# Supplementary material for: Comparative Study of Human and Mouse Postsynaptic Proteomes Finds High Compositional Conservation and Abundance Differences for Key Synaptic Proteins
Source: PLoS One. 2012 Oct 5;7(10):e46683. doi: 10.1371/journal.pone.0046683 (PMC3465276; doi:10.1371/journal.pone.0046683)
Supplement: Table S1 — Protein Identifications and Proteomic Data. For each identified protein several identification (ID) numbers from biological databases are given. The number of total and uniquely identified peptides for each replicate is also provided. Proteins found with two or more peptides in all replicates are classified as members of the consensus mouse PSD. Human orthologues to mouse proteins are provided. Data regarding human PSD proteins is from: Bayes A et al. Nat Neurosci. 2011 Jan;14(1):19–21. (XLSX) [file pone.0046683.s001.xlsx]

## Sheet: Legend
Table S1. Protein Identifications and Proteomic Data.
For each identified protein several identification (ID) numbers from biological databases are given. The number of total and uniquely identified peptides for each replicate is also provided. Proteins found with two or more peptides in all replicates are classified as members of the consensus mouse PSD. Human orthologues to mouse proteins are provided. Data regarding human PSD proteins is from: Ba…

## Sheet: Table S1
Internal ID	Detected Mouse	Detected Human (PMID:21170055)	Appr Gene (m)	MGI ID	Appr Gene (h)	HGNC ID	Ensembl (m)	Ensembl (h)	Entrez Gene (m)	Entrez Gene (h)	Cluster Number	Gene (m)	Gene (h)	IPI (m)	Description (m)	UP (m)	IPI (h)	Description (h)	UP (h)	Shared peptides	mPSD 010203	mPSD01	mPSD02	mPSD03	Present in 3 replicas (m)	Present in 3 replicas (h) (PMID:21170055)
ab16moc_919c	AMBIGUOUS	AMBIGUOUS	Calm3	MGI:103249	CALM3	HGNC:1449	ENSMUSG00000019370	ENSG00000160014	12315	808	Cluster 451	Calm1|Calm2|Calm3	CALM1|CALM2|CALM3	IPI00761696	IPI:IPI00761696.2|SWISS-PROT:P62204|ENSEMBL:ENSMUSP00000019514;ENSMUSP00000048857|REFSEQ:NP_031615;NP_031616;NP_033920|VEGA:OTTMUSP00000018448;OTTMUSP00000025722;OTTMUSP00000025724 Tax_Id=10090 Gene_Symbol=Calm3;Calm1;Calm2 Calmodulin	P62204	IPI00386621	IPI:IPI00386621.1|TREMBL:Q9BRL5 Tax_Id=9606 Gene_Symbol=CALM2;CALM3;CALM1 CALM3 protein	P62158	Shared peptides with CALM1|CALM2|CALM3	4	1	1	4
ab16moc_919a	AMBIGUOUS	AMBIGUOUS	Calm1	MGI:88251	CALM1	HGNC:1442	ENSMUSG00000001175	ENSG00000160014	12313	801	Cluster 451	Calm1|Calm2|Calm3	CALM1|CALM2|CALM3	IPI00761696	IPI:IPI00761696.2|SWISS-PROT:P62204|ENSEMBL:ENSMUSP00000019514;ENSMUSP00000048857|REFSEQ:NP_031615;NP_031616;NP_033920|VEGA:OTTMUSP00000018448;OTTMUSP00000025722;OTTMUSP00000025724 Tax_Id=10090 Gene_Symbol=Calm3;Calm1;Calm2 Calmodulin	P62204	IPI00386621	IPI:IPI00386621.1|TREMBL:Q9BRL5 Tax_Id=9606 Gene_Symbol=CALM2;CALM3;CALM1 CALM3 protein	P62158	Shared peptides with CALM1|CALM2|CALM3	4	1	1	4
ab16moc_919b	AMBIGUOUS	AMBIGUOUS	Calm2	MGI:103250	CALM2	HGNC:1445	ENSMUSG00000036438	ENSG00000143933	12314	805	Cluster 451	Calm1|Calm2|Calm3	CALM1|CALM2|CALM3	IPI00761696	IPI:IPI00761696.2|SWISS-PROT:P62204|ENSEMBL:ENSMUSP00000019514;ENSMUSP00000048857|REFSEQ:NP_031615;NP_031616;NP_033920|VEGA:OTTMUSP00000018448;OTTMUSP00000025722;OTTMUSP00000025724 Tax_Id=10090 Gene_Symbol=Calm3;Calm1;Calm2 Calmodulin	P62204	IPI00386621	IPI:IPI00386621.1|TREMBL:Q9BRL5 Tax_Id=9606 Gene_Symbol=CALM2;CALM3;CALM1 CALM3 protein	P62158	Shared peptides with CALM1|CALM2|CALM3	4	1	1	4
ab16moc_920	YES	AMBIGUOUS	Arf3	MGI:99432	ARF3	HGNC:654	ENSMUSG00000051853	ENSG00000134287	11842	377	Cluster 382	Arf3	ARF3	IPI00221614	IPI:IPI00221614.3|SWISS-PROT:P61205|TREMBL:Q3U344|ENSEMBL:ENSMUSP00000050689;ENSMUSP00000072861|REFSEQ:NP_031504|VEGA:OTTMUSP00000018494 Tax_Id=10090 Gene_Symbol=Arf3 ADP-ribosylation factor 3	P61205	IPI00215917	IPI:IPI00215917.3|SWISS-PROT:P61204|ENSEMBL:ENSP00000256682|REFSEQ:NP_001650|H-INV:HIT000196325|VEGA:OTTHUMP00000041595;OTTHUMP00000165241;OTTHUMP00000167413 Tax_Id=9606 Gene_Symbol=ARF3 ADP-ribosylation factor 3	P61204	Shared peptides with ARF1	4	4	3	3	YES	YES
ab16moc_925	YES	AMBIGUOUS	Arf1	MGI:99431	ARF1	HGNC:652	ENSMUSG00000048076	ENSG00000143761	11840	375	Cluster 382	Arf1	ARF1	IPI00221613	IPI:IPI00221613.5|SWISS-PROT:P84078|ENSEMBL:ENSMUSP00000079905|REFSEQ:NP_031502|VEGA:OTTMUSP00000006686 Tax_Id=10090 Gene_Symbol=Arf1 ADP-ribosylation factor 1	P84078	IPI00215914	IPI:IPI00215914.5|SWISS-PROT:P84077|ENSEMBL:ENSP00000272102;ENSP00000355714|REFSEQ:NP_001019397;NP_001019398;NP_001019399;NP_001649|H-INV:HIT000003095|VEGA:OTTHUMP00000035715;OTTHUMP00000061397 Tax_Id=9606 Gene_Symbol=ARF1 ADP-ribosylation factor 1	P84077	Shared peptides with ARF3	4	4	3	3	YES	YES
ab16moc_505	YES	AMBIGUOUS	Hspa1l	MGI:96231	HSPA1L	HGNC:5234	ENSMUSG00000007033	ENSG00000204390	15482	3305	Cluster 307	Hspa1l	HSPA1L	IPI00133208	IPI:IPI00133208.3|SWISS-PROT:P16627|TREMBL:A1L347;Q91ZU4;Q91ZU5;Q9QWU1|ENSEMBL:ENSMUSP00000007248|REFSEQ:NP_038586|VEGA:OTTMUSP00000017491 Tax_Id=10090 Gene_Symbol=Hspa1l Heat shock 70 kDa protein 1L	P16627	IPI00301277	IPI:IPI00301277.1|SWISS-PROT:P34931|ENSEMBL:ENSP00000364804;ENSP00000364805|REFSEQ:NP_005518|VEGA:OTTHUMP00000029295;OTTHUMP00000062692 Tax_Id=9606 Gene_Symbol=HSPA1L Heat shock 70 kDa protein 1L	P34931	Shared peptides with Hspa1a|Hspa1b	9	9	6	8	YES	YES
ab16moc_465a	YES	AMBIGUOUS	Hspa1a	MGI:96244	HSPA1A	HGNC:5232	ENSMUSG00000067283	ENSG00000204389	193740	3303	Cluster 307	Hspa1a|Hspa1b	HSPA1A|HSPA1B	IPI00798482	IPI:IPI00798482.2|SWISS-PROT:Q61696|TREMBL:Q3TAI8;Q3TU85|ENSEMBL:ENSMUSP00000084586|REFSEQ:NP_034609 Tax_Id=10090 Gene_Symbol=Hspa1a Heat shock 70 kDa protein 1A	Q61696	IPI00304925	IPI:IPI00304925.5|SWISS-PROT:P08107|TREMBL:Q9UQC1|ENSEMBL:ENSP00000364801;ENSP00000364802|REFSEQ:NP_005337|H-INV:HIT000260966|VEGA:OTTHUMP00000014656;OTTHUMP00000029287;OTTHUMP00000029288;OTTHUMP00000029727;OTTHUMP00000029728;OTTHUMP00000062686;OTTHUMP000	P08107	Shared peptides with HSPA1L	10	9	6	9	YES	YES
ab16moc_465b		AMBIGUOUS	Hspa1b	MGI:99517	HSPA1B	HGNC:5233	ENSMUSG00000067284	ENSG00000204388	15511	3304	Cluster 307	Hspa1a|Hspa1b	HSPA1A|HSPA1B	IPI00798482	IPI:IPI00798482.2|SWISS-PROT:Q61696|TREMBL:Q3TAI8;Q3TU85|ENSEMBL:ENSMUSP00000084586|REFSEQ:NP_034609 Tax_Id=10090 Gene_Symbol=Hspa1a Heat shock 70 kDa protein 1A	Q61696	IPI00304925	IPI:IPI00304925.5|SWISS-PROT:P08107|TREMBL:Q9UQC1|ENSEMBL:ENSP00000364801;ENSP00000364802|REFSEQ:NP_005337|H-INV:HIT000260966|VEGA:OTTHUMP00000014656;OTTHUMP00000029287;OTTHUMP00000029288;OTTHUMP00000029727;OTTHUMP00000029728;OTTHUMP00000062686;OTTHUMP000	P08107	Shared peptides with HSPA1L	10	9	6	9	YES	YES
ab16moc_1868		AMBIGUOUS	Tubg2	MGI:2144208	TUBG2	HGNC:12419	ENSMUSG00000045007	ENSG00000037042	103768	27175	Cluster 2218		TUBG2				IPI00299830	IPI:IPI00299830.3|SWISS-PROT:Q9NRH3|ENSEMBL:ENSP00000374319;ENSP00000374320|REFSEQ:NP_057521|H-INV:HIT000074436|VEGA:OTTHUMP00000181220 Tax_Id=9606 Gene_Symbol=TUBG2 Tubulin gamma-2 chain	Q9NRH3	Shared peptides with TUBG1
ab16moc_1867		AMBIGUOUS	Tubg1	MGI:101834	TUBG1	HGNC:12417	ENSMUSG00000035198	ENSG00000131462	103733	7283	Cluster 2218		TUBG1				IPI00295081	IPI:IPI00295081.1|SWISS-PROT:P23258|TREMBL:Q53X79|ENSEMBL:ENSP00000251413|REFSEQ:NP_001061|H-INV:HIT000029781|VEGA:OTTHUMP00000181218 Tax_Id=9606 Gene_Symbol=TUBG1 Tubulin gamma-1 chain	P23258	Shared peptides with TUBG2
ab16moc_1050	YES	YES	Mrps36	MGI:1913378	MRPS36	HGNC:16631	ENSMUSG00000061474	ENSG00000134056	66128	92259	Cluster 372	Mrps36	MRPS36	IPI00315808	IPI:IPI00315808.3|SWISS-PROT:Q9CQX8|TREMBL:Q9D6T9|REFSEQ:NP_079645 Tax_Id=10090 Gene_Symbol=Mrps36 Mitochondrial 28S ribosomal protein S36	Q9CQX8	IPI00020495	IPI:IPI00020495.1|SWISS-PROT:P82909|ENSEMBL:ENSP00000256441|REFSEQ:NP_150597|H-INV:HIT000002452;HIT000289035 Tax_Id=9606 Gene_Symbol=MRPS36 Mitochondrial 28S ribosomal protein S36	P82909		3	2	1	2
ab16moc_1307	YES	YES	Prr7	MGI:3487246	PRR7	HGNC:28130	ENSMUSG00000034686	ENSG00000131188	432763	80758	Cluster 1663	Prr7	PRR7	IPI00132812	IPI:IPI00132812.3|TREMBL:Q3V0I2|ENSEMBL:ENSMUSP00000046776|REFSEQ:NP_001025467 Tax_Id=10090 Gene_Symbol=Prr7 Adult male testis cDNA, RIKEN full-length enriched library, clone:4930589C02 product:hypothetical Proline-rich region profile/Histidine-rich regio	Q3V0I2	IPI00152142	IPI:IPI00152142.2|TREMBL:Q8TB68;Q8WU53|ENSEMBL:ENSP00000327168|REFSEQ:NP_085044|H-INV:HIT000039782|VEGA:OTTHUMP00000161454 Tax_Id=9606 Gene_Symbol=PRR7 Proline-rich protein 7	Q8TB68		2	2	2	2	YES
ab16moc_1313	YES	YES	Usmg5	MGI:1891435	USMG5	HGNC:30889	ENSMUSG00000071528	ENSG00000173915	66477	84833	Cluster 463	Usmg5	USMG5	IPI00624653	IPI:IPI00624653.1|SWISS-PROT:Q78IK2|ENSEMBL:ENSMUSP00000093713;ENSMUSP00000094224|REFSEQ:NP_075700 Tax_Id=10090 Gene_Symbol=Usmg5 Up-regulated during skeletal muscle growth protein 5	Q78IK2	IPI00063903	IPI:IPI00063903.5|SWISS-PROT:Q96IX5|ENSEMBL:ENSP00000311245;ENSP00000337705;ENSP00000358826;ENSP00000358830;ENSP00000358840|REFSEQ:NP_116136|H-INV:HIT000033039|VEGA:OTTHUMP00000020397;OTTHUMP00000020398;OTTHUMP00000020399;OTTHUMP00000020400;OTTHUMP0000002	Q96IX5		2	2	2
ab16moc_514	YES	YES	Cend1	MGI:1929898	CEND1	HGNC:24153	ENSMUSG00000060240	ENSG00000184524	57754	51286	Cluster 77	Cend1	CEND1	IPI00122826	IPI:IPI00122826.1|SWISS-PROT:Q9JKC6|ENSEMBL:ENSMUSP00000081476|REFSEQ:NP_067291 Tax_Id=10090 Gene_Symbol=Cend1 Cell cycle exit and neuronal differentiation protein 1	Q9JKC6	IPI00295601	IPI:IPI00295601.1|SWISS-PROT:Q8N111|ENSEMBL:ENSP00000328336|REFSEQ:NP_057648|H-INV:HIT000081582|VEGA:OTTHUMP00000164431 Tax_Id=9606 Gene_Symbol=CEND1 Cell cycle exit and neuronal differentiation protein 1	Q8N111		9	8	7	7	YES	YES
ab16moc_560	YES	YES	N28178	MGI:2140712	KIAA1045	HGNC:29180	ENSMUSG00000078351	ENSG00000122733	230085	23349	Cluster 728	KIAA1045	N28178	IPI00647986	IPI:IPI00647986.1|SWISS-PROT:Q80TL4-1|TREMBL:A2AG28|REFSEQ:XP_977842|VEGA:OTTMUSP00000006974 Tax_Id=10090 Gene_Symbol=N28178 Isoform 1 of Protein KIAA1045	Q80TL4	IPI00414898	IPI:IPI00414898.3|SWISS-PROT:Q9UPV7|TREMBL:Q58FF1|ENSEMBL:ENSP00000242315|REFSEQ:XP_048592;XP_944714|H-INV:HIT000096606|VEGA:OTTHUMP00000021312;OTTHUMP00000045374 Tax_Id=9606 Gene_Symbol=KIAA1045 similar to Protein KIAA1045	Q9UPV7		8	3	7	3	YES	YES
ab16moc_597	YES	YES	Ccdc127	MGI:1914683	CCDC127	HGNC:30520	ENSMUSG00000021578	ENSG00000164366	67433	133957	Cluster 512	Ccdc127	CCDC127	IPI00131843	IPI:IPI00131843.3|SWISS-PROT:Q3TC33-1|ENSEMBL:ENSMUSP00000022063|REFSEQ:NP_077163 Tax_Id=10090 Gene_Symbol=Ccdc127 Isoform 1 of Coiled-coil domain-containing protein 127	Q3TC33	IPI00060148	IPI:IPI00060148.3|SWISS-PROT:Q96BQ5|ENSEMBL:ENSP00000296824|REFSEQ:NP_660308|H-INV:HIT000037089 Tax_Id=9606 Gene_Symbol=CCDC127 Coiled-coil domain-containing protein 127	Q96BQ5		8	8	4	3	YES
ab16moc_713	YES	YES	Calcoco1	MGI:1914738	CALCOCO1	HGNC:29306	ENSMUSG00000023055	ENSG00000012822	67488	57658	Cluster 1537	Calcoco1	CALCOCO1	IPI00461826	IPI:IPI00461826.1|TREMBL:Q5DTX0;Q8CGU1;Q9D935|ENSEMBL:ENSMUSP00000023818|REFSEQ:NP_080468 Tax_Id=10090 Gene_Symbol=Calcoco1 Coiled-coil transcriptional coactivator	Q5DTX0	IPI00011232	IPI:IPI00011232.3|TREMBL:Q6FI59;Q9H090;Q9P1Z2|ENSEMBL:ENSP00000262059|REFSEQ:NP_065949|VEGA:OTTHUMP00000167718 Tax_Id=9606 Gene_Symbol=CALCOCO1 Calcium-binding and coiled-coil domain 1	Q6FI59		6	3	4	5	YES
ab16moc_931	YES	YES	1810074P20Rik	MGI:1914740	KIAA0776	HGNC:23039	ENSMUSG00000040359	ENSG00000014123	67490	23376	Cluster 2090	KIAA0776	KIAA0776	IPI00317684	IPI:IPI00317684.7|SWISS-PROT:Q8CCJ3-3|TREMBL:A2ANW2;A2RSP7|ENSEMBL:ENSMUSP00000042118;ENSMUSP00000100059|REFSEQ:NP_080470|VEGA:OTTMUSP00000005060 Tax_Id=10090 Gene_Symbol=1810074P20Rik Isoform 1 of Uncharacterized protein KIAA0776	Q8CCJ3	IPI00844000	IPI:IPI00844000.1|SWISS-PROT:O94874|TREMBL:A0PJ53|ENSEMBL:ENSP00000358290|REFSEQ:NP_056138|H-INV:HIT000051688|VEGA:OTTHUMP00000016878;OTTHUMP00000040550 Tax_Id=9606 Gene_Symbol=KIAA0776 Uncharacterized protein KIAA0776	O94874		4	4
ab16moc_155	YES	YES	Ckap4	MGI:2444926	CKAP4	HGNC:16991	ENSMUSG00000046841	ENSG00000136026	216197	10970	Cluster 193	Ckap4	CKAP4	IPI00223047	IPI:IPI00223047.2|SWISS-PROT:Q8BMK4|ENSEMBL:ENSMUSP00000050336|REFSEQ:NP_780660 Tax_Id=10090 Gene_Symbol=Ckap4 Cytoskeleton-associated protein 4	Q8BMK4	IPI00433214	IPI:IPI00433214.1|TREMBL:Q6NWZ1|ENSEMBL:ENSP00000258512 Tax_Id=9606 Gene_Symbol=CKAP4 CKAP4 protein (Fragment)	Q6NWZ1		27	24	17	21	YES	YES
ab16moc_362	YES	YES	2010300C02Rik	MGI:1919347	C2orf55	HGNC:33454	ENSMUSG00000026090	ENSG00000196872	72097	343990	Cluster 1084, Cluster 2471	2010300C02Rik	C2ORF55	IPI00454053	IPI:IPI00454053.5|TREMBL:Q6GQT3|ENSEMBL:ENSMUSP00000060549|REFSEQ:XP_129808 Tax_Id=10090 Gene_Symbol=2010300C02Rik hypothetical protein LOC72097	Q6GQT3	IPI00410436	IPI:IPI00410436.3|TREMBL:Q6NV74|ENSEMBL:ENSP00000352870|REFSEQ:NP_997245|H-INV:HIT000262991 Tax_Id=9606 Gene_Symbol=C2orf55 hypothetical protein LOC343990	Q6NV74		14	12	11	4	YES
ab16moc_857	YES	YES	2310022B05Rik	MGI:1916801	C1orf198	HGNC:25900	ENSMUSG00000031983	ENSG00000119280	69551	84886	Cluster 831, Cluster 1477	2310022B05Rik	C1ORF198	IPI00225267	IPI:IPI00225267.6|SWISS-PROT:Q8C3W1|ENSEMBL:ENSMUSP00000034464|REFSEQ:NP_780358 Tax_Id=10090 Gene_Symbol=2310022B05Rik Uncharacterized protein C1orf198 homolog	Q8C3W1	IPI00013912	IPI:IPI00013912.1|SWISS-PROT:Q9H425|ENSEMBL:ENSP00000355623|REFSEQ:NP_116189|H-INV:HIT000021021|VEGA:OTTHUMP00000035916;OTTHUMP00000060160 Tax_Id=9606 Gene_Symbol=C1orf198 Uncharacterized protein C1orf198	Q9H425		5	2	2	5	YES
ab16moc_1315	YES	YES	Agpat5	MGI:1196345	AGPAT5	HGNC:20886	ENSMUSG00000031467	ENSG00000155189	52123	55326	Cluster 2049	Agpat5	AGPAT5	IPI00221486	IPI:IPI00221486.1|SWISS-PROT:Q9D1E8|TREMBL:Q3TDP3|ENSEMBL:ENSMUSP00000033847|REFSEQ:NP_081068 Tax_Id=10090 Gene_Symbol=Agpat5 1-acyl-sn-glycerol-3-phosphate acyltransferase epsilon	Q9D1E8	IPI00028491	IPI:IPI00028491.4|SWISS-PROT:Q9NUQ2|TREMBL:Q6NUM7|ENSEMBL:ENSP00000285518|REFSEQ:NP_060831|H-INV:HIT000025183|VEGA:OTTHUMP00000176921 Tax_Id=9606 Gene_Symbol=AGPAT5 1-acyl-sn-glycerol-3-phosphate acyltransferase epsilon	Q9NUQ2		2	2	1
ab16moc_426	YES	YES	Plcb1	MGI:97613	PLCB1	HGNC:15917	ENSMUSG00000051177	ENSG00000182621	18795	23236	Cluster 595	Plcb1	PLCB1	IPI00468121	IPI:IPI00468121.1|SWISS-PROT:Q9Z1B3-3|TREMBL:Q2M4J2;Q6PDH1;Q6ZQ92|ENSEMBL:ENSMUSP00000028719|VEGA:OTTMUSP00000016610 Tax_Id=10090 Gene_Symbol=Plcb1 Plcb1 protein	Q9Z1B3	IPI00395561	IPI:IPI00395561.1|SWISS-PROT:Q9NQ66-2|TREMBL:Q17RQ6|ENSEMBL:ENSP00000367904;ENSP00000367908|REFSEQ:NP_877398|VEGA:OTTHUMP00000030238;OTTHUMP00000030239;OTTHUMP00000068049;OTTHUMP00000068050 Tax_Id=9606 Gene_Symbol=PLCB1 Isoform B of 1-phosphatidylinositol	Q9NQ66		11	6	8	4	YES	YES
ab16moc_831	YES	YES	Plcb4	MGI:107464	PLCB4	HGNC:9059	ENSMUSG00000039943	ENSG00000101333	18798	5332	Cluster 1985	Plcb4	PLCB4	IPI00625848	IPI:IPI00625848.2|TREMBL:Q8BXH1;Q91UZ1|ENSEMBL:ENSMUSP00000038409|REFSEQ:NP_038857|VEGA:OTTMUSP00000017026 Tax_Id=10090 Gene_Symbol=Plcb4 Phospholipase C beta 4	Q8BXH1	IPI00014897	IPI:IPI00014897.4|SWISS-PROT:Q15147-1|TREMBL:Q17R56|ENSEMBL:ENSP00000278655;ENSP00000367754|REFSEQ:NP_877949|VEGA:OTTHUMP00000030245;OTTHUMP00000030256 Tax_Id=9606 Gene_Symbol=PLCB4 Isoform 2 of 1-phosphatidylinositol-4,5-bisphosphate phosphodiesterase be	Q15147		5	4	2	3	YES
ab16moc_54	YES	YES	Cnp	MGI:88437	CNP	HGNC:2158	ENSMUSG00000006782	ENSG00000173786	12799	1267	Cluster 11	Cnp1	CNP	IPI00319602	IPI:IPI00319602.3|SWISS-PROT:P16330-1|TREMBL:Q09J73;Q3TYV5|ENSEMBL:ENSMUSP00000066142;ENSMUSP00000099409|REFSEQ:NP_034053|VEGA:OTTMUSP00000001946 Tax_Id=10090 Gene_Symbol=Cnp1 Isoform CNPII of 2',3'-cyclic-nucleotide 3'-phosphodiesterase	P16330	IPI00306667	IPI:IPI00306667.5|SWISS-PROT:P09543-1|REFSEQ:NP_149124|H-INV:HIT000040414|VEGA:OTTHUMP00000041902;OTTHUMP00000164760;OTTHUMP00000181199 Tax_Id=9606 Gene_Symbol=CNP Isoform CNPII of 2',3'-cyclic-nucleotide 3'-phosphodiesterase	P09543		46	36	40	40	YES	YES
ab16moc_1080	YES	YES	Psmc1	MGI:106054	PSMC1	HGNC:9547	ENSMUSG00000021178	ENSG00000100764	19179	5700	Cluster 1488	Psmc1	PSMC1	IPI00133428	IPI:IPI00133428.3|SWISS-PROT:P62192|TREMBL:Q542I9|ENSEMBL:ENSMUSP00000021595|REFSEQ:NP_032973 Tax_Id=10090 Gene_Symbol=Psmc1 26S protease regulatory subunit 4	P62192	IPI00011126	IPI:IPI00011126.6|SWISS-PROT:P62191|TREMBL:Q53HB3;Q53XL8;Q6NW36|ENSEMBL:ENSP00000261303|REFSEQ:NP_002793|H-INV:HIT000029694;HIT000267894|VEGA:OTTHUMP00000028280 Tax_Id=9606 Gene_Symbol=PSMC1 26S protease regulatory subunit 4	P62191		3	3	1	1
ab16moc_1316	YES	YES	Psmd14	MGI:1913284	PSMD14	HGNC:16889	ENSMUSG00000026914	ENSG00000115233	59029	10213	Cluster 1852	Psmd14	PSMD14	IPI00113262	IPI:IPI00113262.1|SWISS-PROT:O35593|TREMBL:A2AR77;Q3UD26;Q9CSU2|ENSEMBL:ENSMUSP00000028278|REFSEQ:NP_067501|VEGA:OTTMUSP00000014073 Tax_Id=10090 Gene_Symbol=Psmd14 26S proteasome non-ATPase regulatory subunit 14	O35593	IPI00024821	IPI:IPI00024821.1|SWISS-PROT:O00487|TREMBL:Q4ZG77;Q53TH1;Q59G89;Q96DE8|ENSEMBL:ENSP00000263639|REFSEQ:NP_005796|H-INV:HIT000011742|VEGA:OTTHUMP00000068474 Tax_Id=9606 Gene_Symbol=PSMD14 26S proteasome non-ATPase regulatory subunit 14	O00487		2	2
ab16moc_1312	YES	YES	Psmd2	MGI:1096584	PSMD2	HGNC:9559	ENSMUSG00000006998	ENSG00000175166	21762	5708	Cluster 2431	Psmd2	PSMD2	IPI00123494	IPI:IPI00123494.3|SWISS-PROT:Q8VDM4|TREMBL:Q3TI61;Q3TIP0;Q3TKV1;Q3TW71;Q3TWL6;Q3TXV1;Q3U9Y8;Q80V77;Q99JX8;Q9CRK7|ENSEMBL:ENSMUSP00000007212|REFSEQ:NP_598862 Tax_Id=10090 Gene_Symbol=Psmd2 26S proteasome non-ATPase regulatory subunit 2	Q8VDM4	IPI00012268	IPI:IPI00012268.3|SWISS-PROT:Q13200|TREMBL:Q53XQ4;Q59EG8;Q9NSM5|ENSEMBL:ENSP00000310129|REFSEQ:NP_002799|H-INV:HIT000031345|VEGA:OTTHUMP00000173805 Tax_Id=9606 Gene_Symbol=PSMD2 26S proteasome non-ATPase regulatory subunit 2	Q13200		2	1	1	2
ab16moc_1309	YES	YES	Bckdk	MGI:1276121	BCKDK	HGNC:16902	ENSMUSG00000030802	ENSG00000103507	12041	10295	Cluster 2016	Bckdk	BCKDK	IPI00115094	IPI:IPI00115094.1|SWISS-PROT:O55028|TREMBL:Q3UC13;Q3UCB5;Q8C6H9;Q99KP1|ENSEMBL:ENSMUSP00000070345|REFSEQ:NP_033869 Tax_Id=10090 Gene_Symbol=Bckdk [3-methyl-2-oxobutanoate dehydrogenase [lipoamide]] kinase, mitochondrial precursor	O55028	IPI00298612	IPI:IPI00298612.1|SWISS-PROT:O14874|TREMBL:Q6FGL4|ENSEMBL:ENSP00000219794|REFSEQ:NP_005872|H-INV:HIT000291719|VEGA:OTTHUMP00000044996;OTTHUMP00000044999;OTTHUMP00000080186;OTTHUMP00000108735 Tax_Id=9606 Gene_Symbol=BCKDK [3-methyl-2-oxobutanoate dehydroge	O14874		2	1	2	2
ab16moc_587	YES	YES	Rps11	MGI:1351329	RPS11	HGNC:10384	ENSMUSG00000003429	ENSG00000142534	27207	6205	Cluster 204	Rps11	RPS11	IPI00117569	IPI:IPI00117569.3|SWISS-PROT:P62281|TREMBL:Q3UC02;Q9CW75;Q9D0P6;Q9DB79|ENSEMBL:ENSMUSP00000071377|REFSEQ:NP_038753 Tax_Id=10090 Gene_Symbol=Rps11 Adult male cerebellum cDNA, RIKEN full-length enriched library, clone:1500004H08 product:ribosomal protein S1	P62281	IPI00025091	IPI:IPI00025091.3|SWISS-PROT:P62280|ENSEMBL:ENSP00000270625|REFSEQ:NP_001006|VEGA:OTTHUMP00000069947;OTTHUMP00000077985 Tax_Id=9606 Gene_Symbol=RPS11 40S ribosomal protein S11	P62280		8	5	6	5	YES
ab16moc_640	YES	YES	Rps13	MGI:1915302	RPS13	HGNC:10386	ENSMUSG00000066362	ENSG00000110700	68052	6207	Cluster 300	Rps13	RPS13	IPI00125901	IPI:IPI00125901.5|SWISS-PROT:P62301|TREMBL:Q5BLJ7;Q921R2|ENSEMBL:ENSMUSP00000082124;ENSMUSP00000091035|REFSEQ:NP_080809;XP_894950;XP_913564 Tax_Id=10090 Gene_Symbol=Rps13;EG625298 40S ribosomal protein S13	P62301	IPI00221089	IPI:IPI00221089.5|SWISS-PROT:P62277|ENSEMBL:ENSP00000228140|REFSEQ:NP_001008|H-INV:HIT000191446 Tax_Id=9606 Gene_Symbol=RPS13 40S ribosomal protein S13	P62277		7	5	3	7	YES	YES
ab16moc_575	YES	YES	Rps14	MGI:98107	RPS14	HGNC:10387	ENSMUSG00000024608	ENSG00000164587	20044	6208	Cluster 152	Rps14	RPS14	IPI00322562	IPI:IPI00322562.5|SWISS-PROT:P62264|TREMBL:O70569;Q3UJS5|ENSEMBL:ENSMUSP00000025511|REFSEQ:NP_065625 Tax_Id=10090 Gene_Symbol=Rps14 40S ribosomal protein S14	P62264	IPI00026271	IPI:IPI00026271.5|SWISS-PROT:P62263|ENSEMBL:ENSP00000311028|REFSEQ:NP_001020241;NP_001020242;NP_005608|H-INV:HIT000275460|VEGA:OTTHUMP00000160559 Tax_Id=9606 Gene_Symbol=RPS14 40S ribosomal protein S14	P62263		8	6	8	8	YES	YES
ab16moc_956	YES	YES	Rps17	MGI:1309526	RPS17	HGNC:10397	ENSMUSG00000061787	ENSG00000184779	20068	6218	Cluster 424	Rps17	RPS17	IPI00465880	IPI:IPI00465880.4|SWISS-PROT:P63276|TREMBL:Q3TK12;Q5M9L7;Q8BT90|ENSEMBL:ENSMUSP00000079628|REFSEQ:NP_033118 Tax_Id=10090 Gene_Symbol=Rps17 40S ribosomal protein S17	P63276	IPI00221093	IPI:IPI00221093.7|SWISS-PROT:P08708|ENSEMBL:ENSP00000346045;ENSP00000346046|REFSEQ:NP_001012|H-INV:HIT000260606|VEGA:OTTHUMP00000176550;OTTHUMP00000176579 Tax_Id=9606 Gene_Symbol=RPS17 40S ribosomal protein S17	P08708		4	3	3	2	YES
ab16moc_372	YES	YES	Rps18	MGI:98146	RPS18	HGNC:10401	ENSMUSG00000008668	ENSG00000182498	20084	6222	Cluster 94	Rps18	RPS18	IPI00474174	IPI:IPI00474174.1|TREMBL:Q5SVZ5|ENSEMBL:ENSMUSP00000079301|VEGA:OTTMUSP00000000606 Tax_Id=10090 Gene_Symbol=OTTMUSG00000000655 Novel protein similar to ribosomal protein S18	Q5SVZ5	IPI00013296	IPI:IPI00013296.3|SWISS-PROT:P62269|TREMBL:Q5GGW2;Q5SUJ3|ENSEMBL:ENSP00000211372;ENSP00000363762|REFSEQ:NP_072045|H-INV:HIT000322965|VEGA:OTTHUMP00000014635;OTTHUMP00000029059;OTTHUMP00000029467;OTTHUMP00000062998 Tax_Id=9606 Gene_Symbol=RPS18 40S ribosom	P62269		13	13	7	7	YES	YES
ab16moc_481	YES	YES	Rps3	MGI:1350917	RPS3	HGNC:10420	ENSMUSG00000030744	ENSG00000149273	27050	6188	Cluster 247	Rps3	RPS3	IPI00134599	IPI:IPI00134599.1|SWISS-PROT:P62908|TREMBL:O89068;Q3UCL7;Q3UK56;Q5YLW3;Q9CZP6;Q9D0A2|ENSEMBL:ENSMUSP00000032998|REFSEQ:NP_036182 Tax_Id=10090 Gene_Symbol=Rps3 40S ribosomal protein S3	P62908	IPI00011253	IPI:IPI00011253.3|SWISS-PROT:P23396|TREMBL:Q53G83;Q6IPX9;Q9NQS8|ENSEMBL:ENSP00000278572|REFSEQ:NP_000996|H-INV:HIT000287076 Tax_Id=9606 Gene_Symbol=RPS3 40S ribosomal protein S3	P23396		10	8	10	5	YES	YES
ab16moc_1121	YES	YES	Rps5	MGI:1097682	RPS5	HGNC:10426	ENSMUSG00000012848	ENSG00000083845	20103	6193	Cluster 1048	Rps5	RPS5	IPI00125521	IPI:IPI00125521.3|SWISS-PROT:P97461|TREMBL:Q91V55|ENSEMBL:ENSMUSP00000004554|REFSEQ:NP_033121 Tax_Id=10090 Gene_Symbol=Rps5 40S ribosomal protein S5	P97461	IPI00008433	IPI:IPI00008433.4|SWISS-PROT:P46782|TREMBL:Q53G25|ENSEMBL:ENSP00000196551|REFSEQ:NP_001000|H-INV:HIT000089748|VEGA:OTTHUMP00000070889;OTTHUMP00000077991 Tax_Id=9606 Gene_Symbol=RPS5 40S ribosomal protein S5	P46782		3	3	2	2	YES
ab16moc_933	YES	YES	Rps8	MGI:98166	RPS8	HGNC:10441	ENSMUSG00000047675	ENSG00000214310	20116	6202	Cluster 858	Rps8	RPS8	IPI00466820	IPI:IPI00466820.4|SWISS-PROT:P62242|TREMBL:Q3UA25;Q3UJU6;Q497E9;Q5M9L9;Q9CQW4;Q9CRJ5|ENSEMBL:ENSMUSP00000091736;ENSMUSP00000099757|REFSEQ:NP_033124|VEGA:OTTMUSP00000010506 Tax_Id=10090 Gene_Symbol=Rps8 40S ribosomal protein S8	P62242	IPI00645201	IPI:IPI00645201.1|TREMBL:Q5JR95;Q9BS10|ENSEMBL:ENSP00000361283|VEGA:OTTHUMP00000010161;OTTHUMP00000065132 Tax_Id=9606 Gene_Symbol=RPS8 Ribosomal protein S8	Q5JR95		4	4	4	2	YES
ab16moc_730	YES	YES	Slc3a2	MGI:96955	SLC3A2	HGNC:11026	ENSMUSG00000010095	ENSG00000168003	17254	6520	Cluster 1260	Slc3a2	SLC3A2	IPI00114641	IPI:IPI00114641.2|SWISS-PROT:P10852|TREMBL:Q3TIP1;Q3TN39;Q3U144;Q60849;Q8BTJ9|ENSEMBL:ENSMUSP00000010239|REFSEQ:NP_032603 Tax_Id=10090 Gene_Symbol=Slc3a2 CD98 heavy chain	P10852	IPI00027493	IPI:IPI00027493.1|SWISS-PROT:P08195|ENSEMBL:ENSP00000340815|REFSEQ:NP_001013269 Tax_Id=9606 Gene_Symbol=SLC3A2 4F2 cell-surface antigen heavy chain	P08195		6	5	3	5	YES
ab16moc_692	YES	YES	Nt5e	MGI:99782	NT5E	HGNC:8021	ENSMUSG00000032420	ENSG00000135318	23959	4907	Cluster 1342	Nt5e	NT5E	IPI00122257	IPI:IPI00122257.1|SWISS-PROT:Q61503|TREMBL:Q0VEE0|ENSEMBL:ENSMUSP00000034992|REFSEQ:NP_035981 Tax_Id=10090 Gene_Symbol=Nt5e 5'-nucleotidase precursor	Q61503	IPI00009456	IPI:IPI00009456.1|SWISS-PROT:P21589|TREMBL:Q53Z63;Q5W116;Q6NZX3|ENSEMBL:ENSP00000257770|REFSEQ:NP_002517|H-INV:HIT000321990|VEGA:OTTHUMP00000016808;OTTHUMP00000040565 Tax_Id=9606 Gene_Symbol=NT5E 5'-nucleotidase precursor	P21589		6	4	4	6	YES
ab16moc_953	YES	YES	Rpl10a	MGI:1343877	RPL10A	HGNC:10299	ENSMUSG00000037805	ENSG00000198755	19896	4736	Cluster 710	Rpl10a	RPL10A	IPI00127085	IPI:IPI00127085.6|SWISS-PROT:P53026|TREMBL:Q3U561;Q5XJF6;Q99JL6|ENSEMBL:ENSMUSP00000048469;ENSMUSP00000071789|REFSEQ:NP_035417 Tax_Id=10090 Gene_Symbol=Rpl10a 60S ribosomal protein L10a	P53026	IPI00412579	IPI:IPI00412579.6|SWISS-PROT:P62906|ENSEMBL:ENSP00000355258|REFSEQ:NP_009035|H-INV:HIT000276952|VEGA:OTTHUMP00000016255;OTTHUMP00000016258 Tax_Id=9606 Gene_Symbol=RPL10A 60S ribosomal protein L10a	P62906		4	3	3
ab16moc_572	YES	YES	Rpl12	MGI:98002	RPL12	HGNC:10302	ENSMUSG00000038900	ENSG00000172746	269261	6136	Cluster 208	Rpl12	RPL12	IPI00754405	IPI:IPI00754405.1|SWISS-PROT:P35979|TREMBL:Q3TIQ2;Q5BLK0;Q8C2K0|ENSEMBL:ENSMUSP00000087739;ENSMUSP00000090284;ENSMUSP00000099875|REFSEQ:XP_001003945;XP_996671|VEGA:OTTMUSP00000013470 Tax_Id=10090 Gene_Symbol=Rpl12;EG668844;LOC672173 similar to 60S ribosom	P35979	IPI00024933	IPI:IPI00024933.3|SWISS-PROT:P30050|ENSEMBL:ENSP00000354739|REFSEQ:NP_000967|H-INV:HIT000301385|VEGA:OTTHUMP00000022186;OTTHUMP00000064361 Tax_Id=9606 Gene_Symbol=RPL12 60S ribosomal protein L12	P30050		8	8	7	7	YES	YES
ab16moc_932	YES	YES	Rpl13a	MGI:1351455	RPL13A	HGNC:10304	ENSMUSG00000003426	ENSG00000177350	27210	23521	Cluster 661	Rpl13a	RPL13A	IPI00223217	IPI:IPI00223217.6|SWISS-PROT:P19253|TREMBL:Q5M9M0|ENSEMBL:ENSMUSP00000003518;ENSMUSP00000099730|REFSEQ:NP_033464|VEGA:OTTMUSP00000017768 Tax_Id=10090 Gene_Symbol=Rpl13a 60S ribosomal protein L13a	P19253	IPI00304612	IPI:IPI00304612.9|SWISS-PROT:P40429|TREMBL:Q0VGL3;Q53H34;Q5QTS3;Q8J015;Q9BSQ6|ENSEMBL:ENSP00000270634|REFSEQ:NP_036555|H-INV:HIT000049876|VEGA:OTTHUMP00000069945;OTTHUMP00000077978;OTTHUMP00000165841 Tax_Id=9606 Gene_Symbol=RPL13A 60S ribosomal protein L1	P40429		4	3	3	2	YES
ab16moc_1096	YES	YES	Rpl18a	MGI:1924058	RPL18A	HGNC:10311	ENSMUSG00000045128	ENSG00000212695	76808	6142	Cluster 966	Rpl18a	RPL18A	IPI00162790	IPI:IPI00162790.1|SWISS-PROT:P62717|TREMBL:Q3THJ0|ENSEMBL:ENSMUSP00000058368|REFSEQ:NP_084027 Tax_Id=10090 Gene_Symbol=Rpl18a 60S ribosomal protein L18a	P62717	IPI00026202	IPI:IPI00026202.1|SWISS-PROT:Q02543|TREMBL:Q32XH3;Q53HD3;Q76N54|ENSEMBL:ENSP00000222247|REFSEQ:NP_000971|H-INV:HIT000262210|VEGA:OTTHUMP00000067734;OTTHUMP00000077980;OTTHUMP00000077981 Tax_Id=9606 Gene_Symbol=RPL18A 60S ribosomal protein L18a	Q02543		3	2	3	3	YES
ab16moc_651	YES	YES	Rpl24	MGI:1915443	RPL24	HGNC:10325	ENSMUSG00000022601	ENSG00000114391	68193	6152	Cluster 176	Rpl24	RPL24	IPI00323806	IPI:IPI00323806.4|TREMBL:Q3UW40|ENSEMBL:ENSMUSP00000081509 Tax_Id=10090 Gene_Symbol=Rpl24 Adult male epididymis cDNA, RIKEN full-length enriched library, clone:9230011J09 product:ribosomal protein L24, full insert sequence	Q3UW40	IPI00306332	IPI:IPI00306332.4|SWISS-PROT:P83731|ENSEMBL:ENSP00000265264|REFSEQ:NP_000977|H-INV:HIT000196873|VEGA:OTTHUMP00000172089 Tax_Id=9606 Gene_Symbol=RPL24 60S ribosomal protein L24	P83731		7	7	6	5	YES
ab16moc_712	YES	YES	Rpl30	MGI:98037	RPL30	HGNC:10333	ENSMUSG00000058600	ENSG00000156482	19946	6156	Cluster 189	Rpl30	RPL30	IPI00222549	IPI:IPI00222549.6|SWISS-PROT:P62889|TREMBL:Q497D7;Q58DZ3;Q5PR15;Q6NSR0|ENSEMBL:ENSMUSP00000075523|REFSEQ:NP_033109;XP_001000091;XP_984841;XP_989293 Tax_Id=10090 Gene_Symbol=LOC675333;Rpl30;LOC666899;LOC670014 60S ribosomal protein L30	P62889	IPI00219156	IPI:IPI00219156.7|SWISS-PROT:P62888|ENSEMBL:ENSP00000287038|REFSEQ:NP_000980|H-INV:HIT000273397|VEGA:OTTHUMP00000178120;OTTHUMP00000178121 Tax_Id=9606 Gene_Symbol=RPL30 60S ribosomal protein L30	P62888		6		4	6
ab16moc_825	YES	YES	Rpl36	MGI:1860603	RPL36	HGNC:13631	ENSMUSG00000057863	ENSG00000130255	54217	25873	Cluster 172	Rpl36	RPL36	IPI00845561	IPI:IPI00845561.1|TREMBL:Q6ZWZ4|ENSEMBL:ENSMUSP00000079340 Tax_Id=10090 Gene_Symbol=Rpl36 Adult male heart cDNA, RIKEN full-length enriched library, clone:1010001F03 product:60S RIBOSOMAL PROTEIN L36 homolog	Q6ZWZ4	IPI00216237	IPI:IPI00216237.5|SWISS-PROT:Q9Y3U8|TREMBL:Q9BYF3|ENSEMBL:ENSP00000252543|REFSEQ:NP_056229;NP_378669|H-INV:HIT000295557|VEGA:OTTHUMP00000066613;OTTHUMP00000077983;OTTHUMP00000077984 Tax_Id=9606 Gene_Symbol=RPL36 60S ribosomal protein L36	Q9Y3U8		5	3	2	5	YES
ab16moc_1119	YES	YES	Rpl38	MGI:1914921	RPL38	HGNC:10349	ENSMUSG00000057322	ENSG00000172809	67671	6169	Cluster 241	Rpl38	RPL38	IPI00677340	IPI:IPI00677340.1|ENSEMBL:ENSMUSP00000092161|REFSEQ:XP_895313;XP_984689 Tax_Id=10090 Gene_Symbol=LOC625646 similar to ribosomal protein L38	-	IPI00215790	IPI:IPI00215790.6|SWISS-PROT:P63173|ENSEMBL:ENSP00000309830|REFSEQ:NP_000990;NP_001030335|H-INV:HIT000326788|VEGA:OTTHUMP00000182261;OTTHUMP00000182262;OTTHUMP00000182264;OTTHUMP00000182265 Tax_Id=9606 Gene_Symbol=RPL38 60S ribosomal protein L38	P63173		3	3	3	2	YES	YES
ab16moc_357	YES	YES	Rpl6	MGI:108057	RPL6	HGNC:10362	ENSMUSG00000029614	ENSG00000089009	19988	6128	Cluster 244	Rpl6	RPL6	IPI00313222	IPI:IPI00313222.5|SWISS-PROT:P47911|TREMBL:Q3UCH0;Q3UFI4|ENSEMBL:ENSMUSP00000031617|REFSEQ:NP_035420 Tax_Id=10090 Gene_Symbol=Rpl6 60S ribosomal protein L6	P47911	IPI00742225	IPI:IPI00742225.1|REFSEQ:XP_940477 Tax_Id=9606 Gene_Symbol=LOC646483 similar to 60S ribosomal protein L6 (TAX-responsive enhancer element-binding protein 107) (TAXREB107) (Neoplasm-related protein C140) isoform 2	-		14	12	8	10	YES
ab16moc_295	YES	YES	Rpl7a	MGI:1353472	RPL7A	HGNC:10364	ENSMUSG00000062647	ENSG00000148303	27176	6130	Cluster 166	Rpl7a	RPL7A	IPI00751517	IPI:IPI00751517.1|REFSEQ:XP_990387 Tax_Id=10090 Gene_Symbol=EG666669 similar to 60S ribosomal protein L7a	P12970	IPI00299573	IPI:IPI00299573.12|SWISS-PROT:P62424|TREMBL:Q5T8U4|ENSEMBL:ENSP00000346018;ENSP00000361076|REFSEQ:NP_000963|H-INV:HIT000195660|VEGA:OTTHUMP00000022469;OTTHUMP00000022470 Tax_Id=9606 Gene_Symbol=RPL7A 60S ribosomal protein L7a	P62424		16	14	8	7	YES
ab16moc_377	YES	YES	Rpl8	MGI:1350927	RPL8	HGNC:10368	ENSMUSG00000003970	ENSG00000161016	26961	6132	Cluster 182	Rpl8	RPL8	IPI00137787	IPI:IPI00137787.3|SWISS-PROT:P62918|TREMBL:Q3THC7;Q3UJS0;Q9Z237|ENSEMBL:ENSMUSP00000004072|REFSEQ:NP_036183 Tax_Id=10090 Gene_Symbol=Rpl8 60S ribosomal protein L8	P62918	IPI00012772	IPI:IPI00012772.8|SWISS-PROT:P62917|ENSEMBL:ENSP00000262584|REFSEQ:NP_000964;NP_150644|H-INV:HIT000029326|VEGA:OTTHUMP00000178490;OTTHUMP00000178494 Tax_Id=9606 Gene_Symbol=RPL8 60S ribosomal protein L8	P62917		13	11	10	7	YES	YES
ab16moc_1104	YES	YES	Atad1	MGI:1915229	ATAD1	HGNC:25903	ENSMUSG00000013662	ENSG00000138138	67979	84896	Cluster 1600	Atad1	ATAD1	IPI00108410	IPI:IPI00108410.1|SWISS-PROT:Q9D5T0|TREMBL:Q9D9C1|ENSEMBL:ENSMUSP00000069962|REFSEQ:NP_080763 Tax_Id=10090 Gene_Symbol=Atad1 ATPase family AAA domain-containing protein 1	Q9D5T0	IPI00171445	IPI:IPI00171445.1|SWISS-PROT:Q8NBU5|TREMBL:Q6DKG1|ENSEMBL:ENSP00000339016;ENSP00000339017|REFSEQ:NP_116199|H-INV:HIT000082258|VEGA:OTTHUMP00000020030;OTTHUMP00000020031;OTTHUMP00000059651 Tax_Id=9606 Gene_Symbol=ATAD1 ATPase family AAA domain-containing p	Q8NBU5		3	2	3	2	YES
ab16moc_278	YES	YES	Aak1	MGI:1098687	AAK1	HGNC:19679	ENSMUSG00000057230	ENSG00000115977	269774	22848	Cluster 642	Aak1	AAK1	IPI00356608	IPI:IPI00356608.4|SWISS-PROT:Q3UHJ0-2|ENSEMBL:ENSMUSP00000003710|REFSEQ:NP_808430 Tax_Id=10090 Gene_Symbol=Aak1 Isoform 2 of AP2-associated protein kinase 1	Q3UHJ0	IPI00479760	IPI:IPI00479760.5|SWISS-PROT:Q2M2I8|TREMBL:Q9BUD9|ENSEMBL:ENSP00000375072|REFSEQ:NP_055726|H-INV:HIT000000765|VEGA:OTTHUMP00000070325;OTTHUMP00000160051 Tax_Id=9606 Gene_Symbol=AAK1 AP2-associated protein kinase 1	Q2M2I8		17	13	15	14	YES	YES
ab16moc_245	YES	YES	Abi1	MGI:104913	ABI1	HGNC:11320	ENSMUSG00000058835	ENSG00000136754	11308	10006	Cluster 181	Abi1	ABI1	IPI00659927	IPI:IPI00659927.1|SWISS-PROT:Q8CBW3-2|TREMBL:Q3TMI0;Q3TPY5;Q3UAH6;Q6AXD3|REFSEQ:NP_001070660 Tax_Id=10090 Gene_Symbol=Abi1 Abi1 protein	Q8CBW3	IPI00431033	IPI:IPI00431033.3|SWISS-PROT:Q8IZP0-8 Tax_Id=9606 Gene_Symbol=ABI1 Isoform 8 of Abl interactor 1	Q8IZP0		19	12	12	11	YES	YES
ab16moc_354	YES	YES	Abi2	MGI:106913	ABI2	HGNC:24011	ENSMUSG00000026782	ENSG00000138443	329165	10152	Cluster 373	Abi2	ABI2	IPI00460671	IPI:IPI00460671.1|TREMBL:Q6AXH6|ENSEMBL:ENSMUSP00000084679 Tax_Id=10090 Gene_Symbol=Abi2 Abi2 protein	Q6AXH6	IPI00442211	IPI:IPI00442211.1|SWISS-PROT:Q9NYB9-2|TREMBL:Q53RS4;Q53SH3|ENSEMBL:ENSP00000261017|REFSEQ:NP_005750|VEGA:OTTHUMP00000163784 Tax_Id=9606 Gene_Symbol=ABI2 Isoform 2 of Abl interactor 2	Q9NYB9		14	10	10	11	YES	YES
ab16moc_350	YES	YES	Acat1	MGI:87870	ACAT1	HGNC:93	ENSMUSG00000032047	ENSG00000075239	110446	38	Cluster 342	Acat1	ACAT1	IPI00154054	IPI:IPI00154054.1|SWISS-PROT:Q8QZT1|TREMBL:Q3TQP7|ENSEMBL:ENSMUSP00000034547|REFSEQ:NP_659033 Tax_Id=10090 Gene_Symbol=Acat1 Acetyl-CoA acetyltransferase, mitochondrial precursor	Q8QZT1	IPI00030363	IPI:IPI00030363.1|SWISS-PROT:P24752|ENSEMBL:ENSP00000265838|REFSEQ:NP_000010|H-INV:HIT000102073 Tax_Id=9606 Gene_Symbol=ACAT1 Acetyl-CoA acetyltransferase, mitochondrial precursor	P24752		14	10	4	9	YES
ab16moc_1325	YES	YES	Mccc2	MGI:1925288	MCCC2	HGNC:6937	ENSMUSG00000021646	ENSG00000131844	78038	64087	Cluster 2405	Mccc2	MCCC2	IPI00553717	IPI:IPI00553717.5|SWISS-PROT:Q3ULD5|ENSEMBL:ENSMUSP00000022148|REFSEQ:NP_084302 Tax_Id=10090 Gene_Symbol=Mccc2 Methylcrotonoyl-CoA carboxylase beta chain, mitochondrial precursor	Q3ULD5	IPI00784044	IPI:IPI00784044.1|SWISS-PROT:Q9HCC0-1|ENSEMBL:ENSP00000373643;ENSP00000373644|REFSEQ:NP_071415|H-INV:HIT000076650 Tax_Id=9606 Gene_Symbol=MCCC2 Isoform 1 of Methylcrotonoyl-CoA carboxylase beta chain, mitochondrial precursor	Q9HCC0		2		2	2
ab16moc_473	YES	YES	Actr3	MGI:1921367	ACTR3	HGNC:170	ENSMUSG00000026341	ENSG00000115091	74117	10096	Cluster 651	Actr3	ACTR3	IPI00115627	IPI:IPI00115627.4|SWISS-PROT:Q99JY9|TREMBL:Q3TGE1;Q3TGW0;Q3TWJ4;Q3UGH0;Q3ULF7;Q9ERF8|ENSEMBL:ENSMUSP00000027579|REFSEQ:NP_076224 Tax_Id=10090 Gene_Symbol=Actr3 Actin-like protein 3	Q99JY9	IPI00028091	IPI:IPI00028091.3|SWISS-PROT:P61158|TREMBL:Q53QM2;Q59FV6|ENSEMBL:ENSP00000263238|REFSEQ:NP_005712|H-INV:HIT000052876|VEGA:OTTHUMP00000041035 Tax_Id=9606 Gene_Symbol=ACTR3 Actin-like protein 3	P61158		10	8	6	9	YES	YES
ab16moc_623	YES	YES	Actr1a	MGI:1858964	ACTR1A	HGNC:167	ENSMUSG00000025228	ENSG00000138107	54130	10121	Cluster 756	Actr1a	ACTR1A	IPI00113895	IPI:IPI00113895.1|SWISS-PROT:P61164|ENSEMBL:ENSMUSP00000039844|REFSEQ:NP_058556 Tax_Id=10090 Gene_Symbol=Actr1a Alpha-centractin	P61164	IPI00029468	IPI:IPI00029468.1|SWISS-PROT:P61163|ENSEMBL:ENSP00000358921|REFSEQ:NP_005727|H-INV:HIT000323909|VEGA:OTTHUMP00000020363;OTTHUMP00000020366 Tax_Id=9606 Gene_Symbol=ACTR1A Alpha-centractin	P61163		7	3	5	4	YES	YES
ab16moc_709	YES	YES	Actr1b	MGI:1917446	ACTR1B	HGNC:168	ENSMUSG00000037351	ENSG00000115073	226977	10120	Cluster 756	Actr1b	ACTR1B	IPI00153990	IPI:IPI00153990.1|SWISS-PROT:Q8R5C5|TREMBL:Q8R1B2|ENSEMBL:ENSMUSP00000047326|REFSEQ:NP_666219 Tax_Id=10090 Gene_Symbol=Actr1b Beta-centractin	Q8R5C5	IPI00029469	IPI:IPI00029469.1|SWISS-PROT:P42025|TREMBL:Q13841|ENSEMBL:ENSP00000289228|REFSEQ:NP_005726|H-INV:HIT000034792|VEGA:OTTHUMP00000161110 Tax_Id=9606 Gene_Symbol=ACTR1B Beta-centractin	P42025		6	3	5	3	YES	YES
ab16moc_474	YES	YES	Actr2	MGI:1913963	ACTR2	HGNC:169	ENSMUSG00000020152	ENSG00000213985	66713	10097	Cluster 606	Actr2	ACTR2	IPI00177038	IPI:IPI00177038.1|SWISS-PROT:P61161|TREMBL:Q5SW83|ENSEMBL:ENSMUSP00000000137|REFSEQ:NP_666355|VEGA:OTTMUSP00000005405 Tax_Id=10090 Gene_Symbol=Actr2 Actin-like protein 2	P61161	IPI00005159	IPI:IPI00005159.3|SWISS-PROT:P61160|TREMBL:Q8IY98|ENSEMBL:ENSP00000260641|REFSEQ:NP_005713|VEGA:OTTHUMP00000041011;OTTHUMP00000159937 Tax_Id=9606 Gene_Symbol=ACTR2 Actin-like protein 2	P61160		10	5	9	4	YES	YES
ab16moc_1253	YES	YES	Acbd5	MGI:1921409	ACBD5	HGNC:23338	ENSMUSG00000026781	ENSG00000107897	74159	91452	Cluster 2254	Acbd5	ACBD5	IPI00845729	IPI:IPI00845729.1|SWISS-PROT:Q5XG73-2|VEGA:OTTMUSP00000012305 Tax_Id=10090 Gene_Symbol=Acbd5 Isoform 2 of Acyl-CoA-binding domain-containing protein 5	Q5XG73	IPI00644427	IPI:IPI00644427.4|SWISS-PROT:Q5T8D3-2|TREMBL:Q8NCM9|ENSEMBL:ENSP00000365070|REFSEQ:NP_001035938;NP_663736|H-INV:HIT000014083|VEGA:OTTHUMP00000019363 Tax_Id=9606 Gene_Symbol=ACBD5 Isoform 2 of Acyl-CoA-binding domain-containing protein 5	Q5T8D3		2	2		2		YES
ab16moc_356	YES	YES	Adam22	MGI:1340046	ADAM22	HGNC:201	ENSMUSG00000040537	ENSG00000008277	11496	53616	Cluster 611	Adam22	ADAM22	IPI00515580	IPI:IPI00515580.2|SWISS-PROT:Q9R1V6-11|ENSEMBL:ENSMUSP00000086124|VEGA:OTTMUSP00000022666 Tax_Id=10090 Gene_Symbol=Adam22 Isoform 9 of ADAM 22 precursor	Q9R1V6	IPI00220635	IPI:IPI00220635.1|SWISS-PROT:Q9P0K1-5|REFSEQ:NP_057435|VEGA:OTTHUMP00000174585 Tax_Id=9606 Gene_Symbol=ADAM22 Isoform 5 of ADAM 22 precursor	Q9P0K1		14	8	9	11	YES
ab16moc_106	YES	YES	Ap1b1	MGI:1096368	AP1B1	HGNC:554	ENSMUSG00000009090	ENSG00000100280	11764	162	Cluster 301	Ap1b1	AP1B1	IPI00648683	IPI:IPI00648683.2|TREMBL:Q8CC13|ENSEMBL:ENSMUSP00000070598 Tax_Id=10090 Gene_Symbol=Ap1b1 Adult male diencephalon cDNA, RIKEN full-length enriched library, clone:9330159F11 product:adaptor protein complex AP-1, beta 1 subunit, full insert sequence	Q8CC13	IPI00413947	IPI:IPI00413947.1|SWISS-PROT:Q10567-2|TREMBL:Q20WL3|ENSEMBL:ENSP00000348297|REFSEQ:NP_663782|VEGA:OTTHUMP00000070100 Tax_Id=9606 Gene_Symbol=AP1B1 Isoform B of AP-1 complex subunit beta-1	Q10567		33	21	19	24	YES	YES
ab16moc_42	YES	YES	Ap2b1	MGI:1919020	AP2B1	HGNC:563	ENSMUSG00000035152	ENSG00000006125	71770	163	Cluster 108	Ap2b1	AP2B1	IPI00378063	IPI:IPI00378063.1|SWISS-PROT:Q9DBG3-2|TREMBL:Q5SWR1|ENSEMBL:ENSMUSP00000018875|REFSEQ:NP_001030931|VEGA:OTTMUSP00000000851 Tax_Id=10090 Gene_Symbol=Ap2b1 Isoform 2 of AP-2 complex subunit beta-1	Q9DBG3	IPI00784366	IPI:IPI00784366.1|SWISS-PROT:P63010-2|TREMBL:Q96EL6|ENSEMBL:ENSP00000373678;ENSP00000373679|REFSEQ:NP_001025177|H-INV:HIT000032665|VEGA:OTTHUMP00000180957 Tax_Id=9606 Gene_Symbol=AP2B1 Isoform 2 of AP-2 complex subunit beta-1	P63010		53	41	39	40	YES	YES
ab16moc_38	YES	YES	Ap2a1	MGI:101921	AP2A1	HGNC:561	ENSMUSG00000060279	ENSG00000196961	11771	160	Cluster 109	Ap2a1	AP2A1	IPI00108780	IPI:IPI00108780.6|SWISS-PROT:P17426-1|ENSEMBL:ENSMUSP00000082519|REFSEQ:NP_031484 Tax_Id=10090 Gene_Symbol=Ap2a1 Isoform A of AP-2 complex subunit alpha-1	P17426	IPI00793223	IPI:IPI00793223.1|REFSEQ:NP_570603|H-INV:HIT000025521|VEGA:OTTHUMP00000076094 Tax_Id=9606 Gene_Symbol=AP2A1 adaptor-related protein complex 2, alpha 1 subunit isoform 2	O95782		55	40	48	39	YES	YES
ab16moc_45	YES	YES	Ap2a2	MGI:101920	AP2A2	HGNC:562	ENSMUSG00000002957	ENSG00000183020	11772	161	Cluster 106	Ap2a2	AP2A2	IPI00310131	IPI:IPI00310131.5|SWISS-PROT:P17427 Tax_Id=10090 Gene_Symbol=Ap2a2 AP-2 complex subunit alpha-2	P17427	IPI00016621	IPI:IPI00016621.6|SWISS-PROT:O94973|TREMBL:Q53ET1;Q9UFK5|ENSEMBL:ENSP00000327694|REFSEQ:NP_036437|H-INV:HIT000000616 Tax_Id=9606 Gene_Symbol=AP2A2 AP-2 complex subunit alpha-2	O94973		50	36	39	38	YES	YES
ab16moc_765	YES	YES	Ap3b2	MGI:1100869	AP3B2	HGNC:567	ENSMUSG00000062444	ENSG00000103723	11775	8120	Cluster 1112	Ap3b2	AP3B2	IPI00420426	IPI:IPI00420426.1|SWISS-PROT:Q9JME5-1|TREMBL:Q3UUE3;Q3UYP8|ENSEMBL:ENSMUSP00000080739|REFSEQ:NP_067467 Tax_Id=10090 Gene_Symbol=Ap3b2 Isoform 1 of AP-3 complex subunit beta-2	Q9JME5	IPI00005793	IPI:IPI00005793.2|SWISS-PROT:Q13367|TREMBL:Q68CN5|ENSEMBL:ENSP00000261722|REFSEQ:NP_004635|H-INV:HIT000062666 Tax_Id=9606 Gene_Symbol=AP3B2 AP-3 complex subunit beta-2	Q13367		5	2	3	3	YES	YES
ab16moc_1328	YES	YES	Ap3s2	MGI:1337060	AP3S2	HGNC:571	ENSMUSG00000063801	ENSG00000157823	11778	10239	Cluster 1234	Ap3s2	AP3S2	IPI00123099	IPI:IPI00123099.2|SWISS-PROT:Q8BSZ2|TREMBL:Q6PAL3;Q8BNE3|ENSEMBL:ENSMUSP00000075082|REFSEQ:NP_033812 Tax_Id=10090 Gene_Symbol=Ap3s2 12 days embryo spinal ganglion cDNA, RIKEN full-length enriched library, clone:D130059B07 product:adaptor-related protein c	Q8BSZ2	IPI00025115	IPI:IPI00025115.1|SWISS-PROT:P59780|TREMBL:Q53H83|ENSEMBL:ENSP00000338777|REFSEQ:NP_005820|H-INV:HIT000031182|VEGA:OTTHUMP00000176765 Tax_Id=9606 Gene_Symbol=AP3S2 AP-3 complex subunit sigma-2	P59780		2	2	1	2
ab16moc_1337	YES	YES	Ap3s1	MGI:1337062	AP3S1	HGNC:2013	ENSMUSG00000024480	ENSG00000177879	11777	1176	Cluster 1377	Ap3s1	AP3S1	IPI00322193	IPI:IPI00322193.2|SWISS-PROT:Q9DCR2|TREMBL:Q3U8S0|ENSEMBL:ENSMUSP00000025357|REFSEQ:NP_033811 Tax_Id=10090 Gene_Symbol=Ap3s1 AP-3 complex subunit sigma-1	Q9DCR2	IPI00014624	IPI:IPI00014624.2|SWISS-PROT:Q92572|TREMBL:Q53XL4|ENSEMBL:ENSP00000325369|REFSEQ:NP_001275|H-INV:HIT000294468|VEGA:OTTHUMP00000159125 Tax_Id=9606 Gene_Symbol=AP3S1 Adapter-related protein complex 3 sigma 1 subunit	Q92572		2	2	1	1
ab16moc_248	YES	YES	Apc	MGI:88039	APC	HGNC:583	ENSMUSG00000005871	ENSG00000134982	11789	324	Cluster 1679	Apc	APC	IPI00119913	IPI:IPI00119913.1|SWISS-PROT:Q61315-1|TREMBL:Q8BNP7;Q8BRD8|ENSEMBL:ENSMUSP00000078337|REFSEQ:NP_031488 Tax_Id=10090 Gene_Symbol=Apc Isoform 1 of Adenomatous polyposis coli protein	Q61315	IPI00215877	IPI:IPI00215877.2|SWISS-PROT:P25054-2 Tax_Id=9606 Gene_Symbol=APC Isoform Short of Adenomatous polyposis coli protein	P25054		19	15	11	8	YES
ab16moc_1041	YES	YES	Cap1	MGI:88262	CAP1	HGNC:20040	ENSMUSG00000028656	ENSG00000131236	12331	10487	Cluster 527	Cap1	CAP1	IPI00137331	IPI:IPI00137331.6|SWISS-PROT:P40124|TREMBL:Q3TC53;Q3U0U5;Q3UNQ0;Q3UVJ2;Q8BPT7|ENSEMBL:ENSMUSP00000068260|REFSEQ:NP_031624|VEGA:OTTMUSP00000009255;OTTMUSP00000009256;OTTMUSP00000009257 Tax_Id=10090 Gene_Symbol=Cap1 Adenylyl cyclase-associated protein 1	P40124	IPI00008274	IPI:IPI00008274.7|SWISS-PROT:Q01518|ENSEMBL:ENSP00000344832;ENSP00000361878;ENSP00000361891|REFSEQ:NP_006358|H-INV:HIT000192150|VEGA:OTTHUMP00000004820;OTTHUMP00000004821;OTTHUMP00000004822;OTTHUMP00000046315 Tax_Id=9606 Gene_Symbol=CAP1 Adenylyl cyclase-	Q01518		3	3	2			YES
ab16moc_946	YES	YES	Arf5	MGI:99434	ARF5	HGNC:658	ENSMUSG00000020440	ENSG00000004059	11844	381	Cluster 743	Arf5	ARF5	IPI00221615	IPI:IPI00221615.5|SWISS-PROT:P84084|TREMBL:A2RTC5|ENSEMBL:ENSMUSP00000020717|REFSEQ:NP_031506|VEGA:OTTMUSP00000023551 Tax_Id=10090 Gene_Symbol=Arf5 ADP-ribosylation factor 5	P84084	IPI00215919	IPI:IPI00215919.5|SWISS-PROT:P84085|TREMBL:A4D0Z3|ENSEMBL:ENSP00000000233|REFSEQ:NP_001653|H-INV:HIT000303708|VEGA:OTTHUMP00000024864;OTTHUMP00000108309 Tax_Id=9606 Gene_Symbol=ARF5 ADP-ribosylation factor 5	P84085		4	4	3	3	YES	YES
ab16moc_158	YES	YES	Mllt4	MGI:1314653	MLLT4	HGNC:7137	ENSMUSG00000068036	ENSG00000130396	17356	4301	Cluster 935	Mllt4	MLLT4	IPI00845596	IPI:IPI00845596.1|ENSEMBL:ENSMUSP00000095014|REFSEQ:NP_034936 Tax_Id=10090 Gene_Symbol=Mllt4 myeloid/lymphoid or mixed lineage-leukemia translocation to 4 homolog	Q9QZQ1	IPI00759546	IPI:IPI00759546.1|SWISS-PROT:P55196-5|TREMBL:Q5JPV5|REFSEQ:NP_001035090|VEGA:OTTHUMP00000017634;OTTHUMP00000017643 Tax_Id=9606 Gene_Symbol=MLLT4 Isoform 5 of Afadin	P55196		27	16	18	17	YES	YES
ab16moc_1131	YES	YES	Aldh3a2	MGI:1353452	ALDH3A2	HGNC:403	ENSMUSG00000010025	ENSG00000072210	11671	224	Cluster 1761	Aldh3a2	ALDH3A2	IPI00761984	IPI:IPI00761984.1|SWISS-PROT:P47740|TREMBL:Q3U7B5;Q5SRE1;Q8C3C9;Q99PH3|VEGA:OTTMUSP00000006019 Tax_Id=10090 Gene_Symbol=Aldh3a2 Aldehyde dehydrogenase family 3, subfamily A2	P47740	IPI00394758	IPI:IPI00394758.1|SWISS-PROT:P51648-2|ENSEMBL:ENSP00000345774|REFSEQ:NP_001026976|H-INV:HIT000030886|VEGA:OTTHUMP00000065800;OTTHUMP00000182567 Tax_Id=9606 Gene_Symbol=ALDH3A2 Isoform 2 of Fatty aldehyde dehydrogenase	P51648		3	2	1	2
ab16moc_303	YES	YES	Add1	MGI:87918	ADD1	HGNC:243	ENSMUSG00000029106	ENSG00000087274	11518	118	Cluster 439	Add1	ADD1	IPI00136000	IPI:IPI00136000.1|SWISS-PROT:Q9QYC0-1|TREMBL:Q8K232|ENSEMBL:ENSMUSP00000001108|REFSEQ:NP_001019629 Tax_Id=10090 Gene_Symbol=Add1 Isoform 1 of Alpha-adducin	Q9QYC0	IPI00019901	IPI:IPI00019901.1|SWISS-PROT:P35611-1|TREMBL:A2A2Q0|REFSEQ:NP_001110|VEGA:OTTHUMP00000151164 Tax_Id=9606 Gene_Symbol=ADD1 Isoform 1 of Alpha-adducin	P35611		15	11	12	12	YES	YES
ab16moc_19	YES	YES	Ctnna2	MGI:88275	CTNNA2	HGNC:2510	ENSMUSG00000063063	ENSG00000066032	12386	1496	Cluster 57	Ctnna2	CTNNA2	IPI00230751	IPI:IPI00230751.2|SWISS-PROT:Q61301-2|TREMBL:Q3TY37;Q8BS72|ENSEMBL:ENSMUSP00000074809|REFSEQ:NP_663785 Tax_Id=10090 Gene_Symbol=Ctnna2 Visual cortex cDNA, RIKEN full-length enriched library, clone:K530006G14 product:catenin alpha 2, full insert sequence	Q61301	IPI00385055	IPI:IPI00385055.4|SWISS-PROT:P26232-1|ENSEMBL:ENSP00000330508|H-INV:HIT000196865 Tax_Id=9606 Gene_Symbol=CTNNA2 Isoform 1 of Catenin alpha-2	P26232		70	46	51	53	YES	YES
ab16moc_198	YES	YES	Ctnna1	MGI:88274	CTNNA1	HGNC:2509	ENSMUSG00000037815	ENSG00000044115	12385	1495	Cluster 525	Ctnna1	CTNNA1	IPI00112963	IPI:IPI00112963.1|SWISS-PROT:P26231|TREMBL:Q3TGQ3;Q545R0;Q6NV50|ENSEMBL:ENSMUSP00000049007|REFSEQ:NP_033948 Tax_Id=10090 Gene_Symbol=Ctnna1 Catenin alpha-1	P26231	IPI00215948	IPI:IPI00215948.4|SWISS-PROT:P35221-1|TREMBL:Q8N1C0|ENSEMBL:ENSP00000304669|REFSEQ:NP_001894|H-INV:HIT000100519 Tax_Id=9606 Gene_Symbol=CTNNA1 Isoform 1 of Catenin alpha-1	P35221		22	11	13	17	YES	YES
ab16moc_31	YES	YES	Ina	MGI:96568	INA	HGNC:6057	ENSMUSG00000034336	ENSG00000148798	226180	9118	Cluster 12	Ina	INA	IPI00135965	IPI:IPI00135965.2|SWISS-PROT:P46660|TREMBL:Q3UMG4|ENSEMBL:ENSMUSP00000041347|REFSEQ:NP_666212|VEGA:OTTMUSP00000017549 Tax_Id=10090 Gene_Symbol=Ina Alpha-internexin	P46660	IPI00001453	IPI:IPI00001453.2|SWISS-PROT:Q16352|TREMBL:Q59EM6;Q5SYD2|ENSEMBL:ENSP00000358865|REFSEQ:NP_116116|H-INV:HIT000032782|VEGA:OTTHUMP00000020396;OTTHUMP00000020403 Tax_Id=9606 Gene_Symbol=INA Alpha-internexin	Q16352		59	52	52	49	YES	YES
ab16moc_499	YES	YES	Napb	MGI:104562	NAPB	HGNC:15751	ENSMUSG00000027438	ENSG00000125814	17957	63908	Cluster 180	Napb	NAPB	IPI00311515	IPI:IPI00311515.2|SWISS-PROT:P28663|TREMBL:A2APW8|ENSEMBL:ENSMUSP00000028926;ENSMUSP00000099454|REFSEQ:NP_062606|VEGA:OTTMUSP00000016726 Tax_Id=10090 Gene_Symbol=Napb Beta-soluble NSF attachment protein	P28663	IPI00748037	IPI:IPI00748037.1|SWISS-PROT:Q9H115|ENSEMBL:ENSP00000366225|REFSEQ:NP_071363|H-INV:HIT000260142|VEGA:OTTHUMP00000030424;OTTHUMP00000030426 Tax_Id=9606 Gene_Symbol=NAPB Beta-soluble NSF attachment protein	Q9H115		9	7	5	4	YES	YES
ab16moc_905	YES	YES	Napa	MGI:104563	NAPA	HGNC:7641	ENSMUSG00000006024	ENSG00000105402	108124	8775	Cluster 665	Napa	NAPA	IPI00118930	IPI:IPI00118930.1|SWISS-PROT:Q9DB05|TREMBL:Q9CXX1|ENSEMBL:ENSMUSP00000006181|REFSEQ:NP_080174 Tax_Id=10090 Gene_Symbol=Napa Alpha-soluble NSF attachment protein	Q9DB05	IPI00009253	IPI:IPI00009253.2|SWISS-PROT:P54920|ENSEMBL:ENSP00000263354|REFSEQ:NP_003818|H-INV:HIT000280180|VEGA:OTTHUMP00000069190;OTTHUMP00000077709;OTTHUMP00000077710 Tax_Id=9606 Gene_Symbol=NAPA Alpha-soluble NSF attachment protein	P54920		4	3	2	1		YES
ab16moc_914	YES	YES	Maoa	MGI:96915	MAOA	HGNC:6833	ENSMUSG00000025037	ENSG00000189221	17161	4128	Cluster 1451	Maoa	MAOA	IPI00169711	IPI:IPI00169711.1|SWISS-PROT:Q64133 Tax_Id=10090 Gene_Symbol=Maoa Amine oxidase [flavin-containing] A	Q64133	IPI00008483	IPI:IPI00008483.1|SWISS-PROT:P21397|TREMBL:Q49A63;Q53EZ0;Q5HYP1;Q5UL91;Q5UL94;Q5ULA3;Q5ULA9|ENSEMBL:ENSP00000340684|REFSEQ:NP_000231|H-INV:HIT000196193|VEGA:OTTHUMP00000023165;OTTHUMP00000061531 Tax_Id=9606 Gene_Symbol=MAOA Amine oxidase [flavin-containin	P21397		4	4	1	1		YES
ab16moc_1248	YES	YES	Maob	MGI:96916	MAOB	HGNC:6834	ENSMUSG00000040147	ENSG00000069535	109731	4129	Cluster 2363	Maob	MAOB	IPI00226140	IPI:IPI00226140.5|SWISS-PROT:Q8BW75|TREMBL:Q14CG9|ENSEMBL:ENSMUSP00000040550|REFSEQ:NP_766366|VEGA:OTTMUSP00000018395 Tax_Id=10090 Gene_Symbol=Maob Amine oxidase [flavin-containing] B	Q8BW75	IPI00328156	IPI:IPI00328156.9|SWISS-PROT:P27338|ENSEMBL:ENSP00000367309|REFSEQ:NP_000889|H-INV:HIT000196220|VEGA:OTTHUMP00000023166;OTTHUMP00000061533 Tax_Id=9606 Gene_Symbol=MAOB Amine oxidase [flavin-containing] B	P27338		2	2				YES
ab16moc_305	YES	YES	Amph	MGI:103574	AMPH	HGNC:471	ENSMUSG00000021314	ENSG00000078053	218038	273	Cluster 695	Amph	AMPH	IPI00400180	IPI:IPI00400180.1|SWISS-PROT:Q7TQF7|TREMBL:Q80YA2;Q8BXH2|ENSEMBL:ENSMUSP00000003345|REFSEQ:NP_778172 Tax_Id=10090 Gene_Symbol=Amph Amphiphysin	Q7TQF7	IPI00305486	IPI:IPI00305486.3|SWISS-PROT:P49418-1|TREMBL:A4D1X9;Q9UQI4|ENSEMBL:ENSP00000348602|REFSEQ:NP_001626|H-INV:HIT000323843|VEGA:OTTHUMP00000025343;OTTHUMP00000135289 Tax_Id=9606 Gene_Symbol=AMPH Isoform 1 of Amphiphysin	P49418		15	12	9	7	YES	YES
ab16moc_1077	YES	YES	Raph1	MGI:1924550	RAPH1	HGNC:14436	ENSMUSG00000026014	ENSG00000173166	77300	65059	Cluster 1452	Raph1	RAPH1	IPI00378430	IPI:IPI00378430.3|ENSEMBL:ENSMUSP00000027168|VEGA:OTTMUSP00000002122 Tax_Id=10090 Gene_Symbol=Raph1 81 kDa protein	-	IPI00656088	IPI:IPI00656088.2|SWISS-PROT:Q70E73-1|ENSEMBL:ENSP00000363617 Tax_Id=9606 Gene_Symbol=RAPH1 Isoform 1 of Ras-associated and pleckstrin homology domains-containing protein 1	Q70E73		3	2	2	2	YES
ab16moc_577	YES	YES	Apoe	MGI:88057	APOE	HGNC:613	ENSMUSG00000002985	ENSG00000130203	11816	348	Cluster 613	Apoe	APOE	IPI00323571	IPI:IPI00323571.1|SWISS-PROT:P08226|TREMBL:Q3TX45;Q3TXU4;Q3UBS0;Q3UEE7;Q3UF21;Q4FK40;Q6GTX3;Q8C6E4|ENSEMBL:ENSMUSP00000003066|REFSEQ:NP_033826 Tax_Id=10090 Gene_Symbol=Apoe Apolipoprotein E precursor	P08226	IPI00021842	IPI:IPI00021842.1|SWISS-PROT:P02649|TREMBL:Q13791;Q6LA97;Q6LBZ1;Q8TCZ8|ENSEMBL:ENSP00000252486|REFSEQ:NP_000032|VEGA:OTTHUMP00000069000;OTTHUMP00000076108;OTTHUMP00000159143 Tax_Id=9606 Gene_Symbol=APOE Apolipoprotein E precursor	P02649		8	6	4	5	YES	YES
ab16moc_1271	YES	YES	Aqp4	MGI:107387	AQP4	HGNC:637	ENSMUSG00000024411	ENSG00000171885	11829	361	Cluster 532	Aqp4	AQP4	IPI00135626	IPI:IPI00135626.2|SWISS-PROT:P55088-1|TREMBL:Q3V388;Q4FJP1;Q8BR89;Q8K4M1|ENSEMBL:ENSMUSP00000078088|REFSEQ:NP_033830 Tax_Id=10090 Gene_Symbol=Aqp4 Isoform 2 of Aquaporin-4	P55088	IPI00022799	IPI:IPI00022799.1|SWISS-PROT:P55087-1|TREMBL:Q53H97|ENSEMBL:ENSP00000372654|REFSEQ:NP_001641|H-INV:HIT000101680|VEGA:OTTHUMP00000073062;OTTHUMP00000162792 Tax_Id=9606 Gene_Symbol=AQP4 Isoform 2 of Aquaporin-4	P55087		2	2	1	1		YES
ab16moc_944	YES	YES	Arfgap2	MGI:1924288	ARFGAP2	HGNC:13504	ENSMUSG00000027255	ENSG00000149182	77038	84364	Cluster 1635	Zfp289	ZNF289	IPI00109656	IPI:IPI00109656.2|SWISS-PROT:Q99K28-2|ENSEMBL:ENSMUSP00000028691|VEGA:OTTMUSP00000015325 Tax_Id=10090 Gene_Symbol=Zfp289 Isoform 2 of GTPase-activating protein ZNF289	Q99K28	IPI00297322	IPI:IPI00297322.3|SWISS-PROT:Q8N6H7|ENSEMBL:ENSP00000327309|REFSEQ:NP_115765|H-INV:HIT000040964 Tax_Id=9606 Gene_Symbol=ZNF289 GTPase-activating protein ZNF289	Q8N6H7		4	3	1	2
ab16moc_958	YES	YES	Agap1	MGI:2653690	AGAP1	HGNC:16922	ENSMUSG00000055013	ENSG00000157985	347722	116987	Cluster 1870	Centg2	CENTG2	IPI00226729	IPI:IPI00226729.1|SWISS-PROT:Q8BXK8|ENSEMBL:ENSMUSP00000027521|REFSEQ:NP_835220 Tax_Id=10090 Gene_Symbol=Centg2 Centaurin-gamma 2	Q8BXK8	IPI00456244	IPI:IPI00456244.2|SWISS-PROT:Q9UPQ3-2|TREMBL:Q4ZG22;Q53RW1|ENSEMBL:ENSP00000338378|REFSEQ:NP_055729|H-INV:HIT000000816|VEGA:OTTHUMP00000164399 Tax_Id=9606 Gene_Symbol=CENTG2 Isoform 2 of Centaurin-gamma 2	Q9UPQ3		4		3	4
ab16moc_937	YES	YES	Agap3	MGI:2183446	AGAP3	HGNC:16923	ENSMUSG00000023353	ENSG00000133612	213990	116988	Cluster 2180	Centg3	CENTG3	IPI00128319	IPI:IPI00128319.1|SWISS-PROT:Q8VHH5-1|TREMBL:Q8BV81;Q8K0K1|ENSEMBL:ENSMUSP00000024123|REFSEQ:NP_631892 Tax_Id=10090 Gene_Symbol=Centg3 Isoform 1 of Centaurin-gamma 3	Q8VHH5	IPI00163185	IPI:IPI00163185.8|SWISS-PROT:Q96P47-2|ENSEMBL:ENSP00000334157|REFSEQ:NP_114152|H-INV:HIT000079280 Tax_Id=9606 Gene_Symbol=CENTG3 centaurin, gamma 3 isoform a	Q96P47		4	2	2	4	YES
ab16moc_120	YES	YES	Atp5b	MGI:107801	ATP5B	HGNC:830	ENSMUSG00000025393	ENSG00000110955	11947	506	Cluster 50	Atp5b	ATP5B	IPI00468481	IPI:IPI00468481.2|SWISS-PROT:P56480|ENSEMBL:ENSMUSP00000026459|REFSEQ:NP_058054 Tax_Id=10090 Gene_Symbol=Atp5b ATP synthase subunit beta, mitochondrial precursor	P56480	IPI00303476	IPI:IPI00303476.1|SWISS-PROT:P06576|TREMBL:Q0QEN7|ENSEMBL:ENSP00000262030|REFSEQ:NP_001677|H-INV:HIT000279396|VEGA:OTTHUMP00000041611;OTTHUMP00000168049 Tax_Id=9606 Gene_Symbol=ATP5B ATP synthase subunit beta, mitochondrial precursor	P06576		32	29	22	20	YES	YES
ab16moc_1093	YES	YES	Atp5d	MGI:1913293	ATP5D	HGNC:837	ENSMUSG00000003072	ENSG00000099624	66043	513	Cluster 615	Atp5d	ATP5D	IPI00453777	IPI:IPI00453777.2|SWISS-PROT:Q9D3D9|TREMBL:Q4FK74;Q9D0J2;Q9DCZ0|ENSEMBL:ENSMUSP00000003156|REFSEQ:NP_079589|VEGA:OTTMUSP00000020609 Tax_Id=10090 Gene_Symbol=Atp5d ATP synthase delta chain, mitochondrial precursor	Q9D3D9	IPI00024920	IPI:IPI00024920.1|SWISS-PROT:P30049|TREMBL:Q6FG90|ENSEMBL:ENSP00000215375|REFSEQ:NP_001001975;NP_001678|H-INV:HIT000038255|VEGA:OTTHUMP00000066442;OTTHUMP00000076121;OTTHUMP00000076122 Tax_Id=9606 Gene_Symbol=ATP5D ATP synthase delta chain, mitochondrial	P30049		3	3	3	3	YES	YES
ab16moc_412	YES	YES	Atp5c1	MGI:1261437	ATP5C1	HGNC:833	ENSMUSG00000025781	ENSG00000165629	11949	509	Cluster 302	Atp5c1	ATP5C1	IPI00750074	IPI:IPI00750074.1|TREMBL:Q8C2Q8;Q9Z1F5|VEGA:OTTMUSP00000011846 Tax_Id=10090 Gene_Symbol=Atp5c1 2 days neonate thymus thymic cells cDNA, RIKEN full-length enriched library, clone:E430005G03 product:ATP synthase, H+ transporting, mitochondrial F1 complex, g	Q8C2Q8	IPI00478410	IPI:IPI00478410.2|SWISS-PROT:P36542-1|TREMBL:Q6I9V2;Q8TAS0|ENSEMBL:ENSP00000349142|REFSEQ:NP_001001973|H-INV:HIT000100602|VEGA:OTTHUMP00000019066;OTTHUMP00000019068 Tax_Id=9606 Gene_Symbol=ATP5C1 Isoform Liver of ATP synthase gamma chain, mitochondrial pr	P36542		12	11	7	4	YES
ab16moc_570	YES	YES	Abcd3	MGI:1349216	ABCD3	HGNC:67	ENSMUSG00000028127	ENSG00000117528	19299	5825	Cluster 1220	Abcd3	ABCD3	IPI00135646	IPI:IPI00135646.1|SWISS-PROT:P55096 Tax_Id=10090 Gene_Symbol=Abcd3 ATP-binding cassette sub-family D member 3	P55096	IPI00002372	IPI:IPI00002372.1|SWISS-PROT:P28288|ENSEMBL:ENSP00000359233|REFSEQ:NP_002849|H-INV:HIT000196464|VEGA:OTTHUMP00000012428;OTTHUMP00000058946 Tax_Id=9606 Gene_Symbol=ABCD3 ATP-binding cassette sub-family D member 3	P28288		8	6	4	7	YES	YES
ab16moc_728	YES	YES	Dnajc6	MGI:1919935	DNAJC6	HGNC:15469	ENSMUSG00000028528	ENSG00000116675	72685	9829	Cluster 1784	Dnajc6	DNAJC6	IPI00762713	IPI:IPI00762713.1|SWISS-PROT:Q80TZ3-3 Tax_Id=10090 Gene_Symbol=Dnajc6 Isoform 3 of Putative tyrosine-protein phosphatase auxilin	Q80TZ3	IPI00184119	IPI:IPI00184119.6|SWISS-PROT:O75061-2|ENSEMBL:ENSP00000360108|VEGA:OTTHUMP00000010634;OTTHUMP00000070251 Tax_Id=9606 Gene_Symbol=DNAJC6 Isoform 2 of Putative tyrosine-protein phosphatase auxilin	O75061		6	3	3	5	YES
ab16moc_1286	YES	YES	Bsg	MGI:88208	BSG	HGNC:1116	ENSMUSG00000023175	ENSG00000172270	12215	682	Cluster 1697	Bsg	BSG	IPI00113869	IPI:IPI00113869.1|SWISS-PROT:P18572-2|TREMBL:O55108|REFSEQ:NP_001070652 Tax_Id=10090 Gene_Symbol=Bsg Isoform 2 of Basigin precursor	P18572	IPI00218019	IPI:IPI00218019.1|SWISS-PROT:P35613-1|ENSEMBL:ENSP00000333769|REFSEQ:NP_001719|VEGA:OTTHUMP00000042006;OTTHUMP00000076160 Tax_Id=9606 Gene_Symbol=BSG Isoform 1 of Basigin precursor	P35613		2	2
ab16moc_4	YES	YES	Bsn	MGI:1277955	BSN	HGNC:1117	ENSMUSG00000032589	ENSG00000164061	12217	8927	Cluster 124	Bsn	BSN	IPI00134093	IPI:IPI00134093.4|SWISS-PROT:O88737-1|TREMBL:Q3TUN1;Q3UXD6|ENSEMBL:ENSMUSP00000035208|REFSEQ:NP_031593|VEGA:OTTMUSP00000018359 Tax_Id=10090 Gene_Symbol=Bsn Isoform 1 of Protein bassoon	O88737	IPI00020153	IPI:IPI00020153.3|SWISS-PROT:Q9UPA5|TREMBL:Q2NLD2;Q2NLD3|ENSEMBL:ENSP00000296452|REFSEQ:NP_003449|H-INV:HIT000064389|VEGA:OTTHUMP00000165010;OTTHUMP00000165198;OTTHUMP00000171164 Tax_Id=9606 Gene_Symbol=BSN Protein bassoon	Q9UPA5		202	170	162	145	YES	YES
ab16moc_1135	YES	YES	Bag5	MGI:1917619	BAG5	HGNC:941	ENSMUSG00000049792	ENSG00000166170	70369	9529	Cluster 1827	Bag5	BAG5	IPI00229727	IPI:IPI00229727.3|SWISS-PROT:Q8CI32|ENSEMBL:ENSMUSP00000051049|REFSEQ:NP_081680 Tax_Id=10090 Gene_Symbol=Bag5 BAG family molecular chaperone regulator 5	Q8CI32	IPI00007731	IPI:IPI00007731.1|SWISS-PROT:Q9UL15|ENSEMBL:ENSP00000299204|REFSEQ:NP_001015048;NP_004864|H-INV:HIT000000590|VEGA:OTTHUMP00000028384 Tax_Id=9606 Gene_Symbol=BAG5 BAG family molecular chaperone regulator 5	Q9UL15		3	3	1	1
ab16moc_306	YES	YES	Add2	MGI:87919	ADD2	HGNC:244	ENSMUSG00000030000	ENSG00000075340	11519	119	Cluster 702	Add2	ADD2	IPI00323122	IPI:IPI00323122.1|SWISS-PROT:Q9QYB8-1|TREMBL:Q8C0Y2|ENSEMBL:ENSMUSP00000032069|REFSEQ:NP_038486 Tax_Id=10090 Gene_Symbol=Add2 Isoform 1 of Beta-adducin	Q9QYB8	IPI00019904	IPI:IPI00019904.2|SWISS-PROT:P35612-1|TREMBL:Q05DK5|ENSEMBL:ENSP00000264436|REFSEQ:NP_001608|VEGA:OTTHUMP00000160123 Tax_Id=9606 Gene_Symbol=ADD2 Isoform 1 of Beta-adducin	P35612		15	6	7	11	YES	YES
ab16moc_86	YES	YES	Ctnnb1	MGI:88276	CTNNB1	HGNC:2514	ENSMUSG00000006932	ENSG00000168036	12387	1499	Cluster 110	Ctnnb1	CTNNB1	IPI00125899	IPI:IPI00125899.1|SWISS-PROT:Q02248|TREMBL:Q80VE7|ENSEMBL:ENSMUSP00000007130|REFSEQ:NP_031640|VEGA:OTTMUSP00000017750 Tax_Id=10090 Gene_Symbol=Ctnnb1 Catenin beta-1	Q02248	IPI00017292	IPI:IPI00017292.1|SWISS-PROT:P35222-1|ENSEMBL:ENSP00000344456|REFSEQ:NP_001895;XP_001133675|H-INV:HIT000324313|VEGA:OTTHUMP00000096209;OTTHUMP00000162082;OTTHUMP00000165222;OTTHUMP00000165223;OTTHUMP00000170771;OTTHUMP00000170772 Tax_Id=9606 Gene_Symbol=C	P35222		36	29	31	26	YES	YES
ab16moc_568	YES	YES	Eprs	MGI:97838	EPRS	HGNC:3418	ENSMUSG00000026615	ENSG00000136628	107508	2058	Cluster 2011	Eprs	EPRS	IPI00339916	IPI:IPI00339916.7|SWISS-PROT:Q8CGC7|TREMBL:Q3TLK2;Q3TMX9;Q3UFJ2;Q3UGD4;Q4VC16;Q8BTR1;Q9CRF9|ENSEMBL:ENSMUSP00000045841|REFSEQ:NP_084011 Tax_Id=10090 Gene_Symbol=Eprs Bifunctional aminoacyl-tRNA synthetase	Q8CGC7	IPI00013452	IPI:IPI00013452.8|SWISS-PROT:P07814|TREMBL:A0AVA9;Q05BP6;Q05DF8;Q3KQZ8;Q5DSM1;Q5H9S5;Q6PD57;Q86X73|ENSEMBL:ENSP00000355890|REFSEQ:NP_004437|H-INV:HIT000321887|VEGA:OTTHUMP00000035562;OTTHUMP00000061115 Tax_Id=9606 Gene_Symbol=EPRS glutamyl-prolyl tRNA syn	P07814		8	5	1	4		YES
ab16moc_419	YES	YES	Bai1	MGI:1933736	BAI1	HGNC:943	ENSMUSG00000034730	ENSG00000181790	107831	575	Cluster 1563	Bai1	BAI1	IPI00229528	IPI:IPI00229528.5|SWISS-PROT:Q3UHD1|TREMBL:Q5DTN9;Q8BL11|ENSEMBL:ENSMUSP00000046097|REFSEQ:NP_778156 Tax_Id=10090 Gene_Symbol=Bai1 Brain-specific angiogenesis inhibitor 1 precursor	Q3UHD1	IPI00022333	IPI:IPI00022333.1|SWISS-PROT:O14514|ENSEMBL:ENSP00000313046|REFSEQ:NP_001693|H-INV:HIT000058053|VEGA:OTTHUMP00000178295 Tax_Id=9606 Gene_Symbol=BAI1 Brain-specific angiogenesis inhibitor 1 precursor	O14514		12	9	8	7	YES
ab16moc_683	YES	YES	Bcan	MGI:1096385	BCAN	HGNC:23059	ENSMUSG00000004892	ENSG00000132692	12032	63827	Cluster 1758	Bcan	BCAN	IPI00623371	IPI:IPI00623371.2|SWISS-PROT:Q61361|TREMBL:Q3TQE9;Q80WT7|ENSEMBL:ENSMUSP00000088491|REFSEQ:NP_031555 Tax_Id=10090 Gene_Symbol=Bcan Brevican core protein precursor	Q61361	IPI00456623	IPI:IPI00456623.2|SWISS-PROT:Q96GW7-1|TREMBL:Q59F90;Q5SZ10;Q9NT67|ENSEMBL:ENSP00000331210|REFSEQ:NP_068767|H-INV:HIT000252416|VEGA:OTTHUMP00000032164;OTTHUMP00000060121 Tax_Id=9606 Gene_Symbol=BCAN Isoform 1 of Brevican core protein precursor	Q96GW7		6	4	3	5	YES	YES
ab16moc_1132	YES	YES	Ptplad1	MGI:1889341	PTPLAD1	HGNC:24175	ENSMUSG00000033629	ENSG00000074696	57874	51495	Cluster 1662	Ptplad1	PTPLAD1	IPI00322145	IPI:IPI00322145.9|TREMBL:O09003;Q6PGH3;Q8BGM8;Q8K2C9|ENSEMBL:ENSMUSP00000044955|REFSEQ:NP_067320 Tax_Id=10090 Gene_Symbol=Ptplad1 Protein tyrosine phosphatase-like A domain containing 1	O09003	IPI00008998	IPI:IPI00008998.1|TREMBL:Q6PD63;Q8IUI5;Q8NC86;Q96T12;Q9NQA7;Q9P035|ENSEMBL:ENSP00000261875|REFSEQ:NP_057479|H-INV:HIT000081933|VEGA:OTTHUMP00000175891 Tax_Id=9606 Gene_Symbol=PTPLAD1 Protein-tyrosine phosphatase-like A domain-containing protein 1	Q6PD63		3	3	2	1
ab16moc_338	YES	YES	Mthfd1	MGI:1342005	MTHFD1	HGNC:7432	ENSMUSG00000021048	ENSG00000100714	108156	4522	Cluster 590	Mthfd1	MTHFD1	IPI00122862	IPI:IPI00122862.4|SWISS-PROT:Q922D8|TREMBL:Q3TW74;Q3UZH3;Q8BXX7;Q8BY49;Q8R013|ENSEMBL:ENSMUSP00000021443|REFSEQ:NP_620084 Tax_Id=10090 Gene_Symbol=Mthfd1 C-1-tetrahydrofolate synthase, cytoplasmic	Q922D8	IPI00218342	IPI:IPI00218342.10|SWISS-PROT:P11586|ENSEMBL:ENSP00000216605|REFSEQ:NP_005947|H-INV:HIT000191225|VEGA:OTTHUMP00000180657 Tax_Id=9606 Gene_Symbol=MTHFD1 C-1-tetrahydrofolate synthase, cytoplasmic	P11586		14	6	1	10		YES
ab16moc_817	YES	YES	Ctbp1	MGI:1201685	CTBP1	HGNC:2494	ENSMUSG00000037373	ENSG00000159692	13016	1487	Cluster 1079	Ctbp1	CTBP1	IPI00845775	IPI:IPI00845775.1|SWISS-PROT:O88712-3 Tax_Id=10090 Gene_Symbol=Ctbp1 Isoform 3 of C-terminal-binding protein 1	O88712	IPI00012835	IPI:IPI00012835.1|SWISS-PROT:Q13363|TREMBL:Q4KMQ8;Q4W5N3|ENSEMBL:ENSP00000290921;ENSP00000372411|REFSEQ:NP_001319|H-INV:HIT000219514|VEGA:OTTHUMP00000113364 Tax_Id=9606 Gene_Symbol=CTBP1 C-terminal-binding protein 1	Q13363		5	2	4	4	YES
ab16moc_1335	YES	YES	Mpp1	MGI:105941	MPP1	HGNC:7219	ENSMUSG00000031402	ENSG00000130830	17524	4354	Cluster 2217	Mpp1	MPP1	IPI00137706	IPI:IPI00137706.1|SWISS-PROT:P70290|TREMBL:Q542P4;Q684Q6|ENSEMBL:ENSMUSP00000033775|REFSEQ:NP_032647|VEGA:OTTMUSP00000022728 Tax_Id=10090 Gene_Symbol=Mpp1 55 kDa erythrocyte membrane protein	P70290	IPI00215610	IPI:IPI00215610.2|SWISS-PROT:Q00013|TREMBL:Q2TSB6;Q53F93;Q5J7V5|ENSEMBL:ENSP00000358547|REFSEQ:NP_002427|H-INV:HIT000196150|VEGA:OTTHUMP00000026054;OTTHUMP00000061455 Tax_Id=9606 Gene_Symbol=MPP1 55 kDa erythrocyte membrane protein	Q00013		2	1	2	1
ab16moc_352	YES	YES	Capn5	MGI:1100859	CAPN5	HGNC:1482	ENSMUSG00000035547	ENSG00000149260	12337	726	Cluster 537	Capn5	CAPN5	IPI00114962	IPI:IPI00114962.1|SWISS-PROT:O08688|TREMBL:Q3TDS7;Q3TPL4;Q3UTF3|ENSEMBL:ENSMUSP00000048183|REFSEQ:NP_031628|VEGA:OTTMUSP00000025702;OTTMUSP00000025703 Tax_Id=10090 Gene_Symbol=Capn5 Calpain-5	O08688	IPI00742984	IPI:IPI00742984.1|SWISS-PROT:O15484|ENSEMBL:ENSP00000278559|REFSEQ:NP_004046|H-INV:HIT000038281 Tax_Id=9606 Gene_Symbol=CAPN5 Calpain-5	O15484		14	12	7	7	YES	YES
ab16moc_584	YES	YES	Prkar1a	MGI:104878	PRKAR1A	HGNC:9388	ENSMUSG00000020612	ENSG00000108946	19084	5573	Cluster 671	Prkar1a	PRKAR1A	IPI00762049	IPI:IPI00762049.2|SWISS-PROT:Q9DBC7|TREMBL:A2AI68;Q3UBA7;Q9CS50|ENSEMBL:ENSMUSP00000056500|REFSEQ:NP_068680|VEGA:OTTMUSP00000003353;OTTMUSP00000003354 Tax_Id=10090 Gene_Symbol=Prkar1a cAMP-dependent protein kinase type I-alpha regulatory subunit	Q9DBC7	IPI00021831	IPI:IPI00021831.1|SWISS-PROT:P10644|TREMBL:Q68DQ4|ENSEMBL:ENSP00000351410|REFSEQ:NP_002725;NP_997636;NP_997637|H-INV:HIT000051663|VEGA:OTTHUMP00000182241 Tax_Id=9606 Gene_Symbol=PRKAR1A cAMP-dependent protein kinase type I-alpha regulatory subunit	P10644		8	7	5	5	YES	YES
ab16moc_225	YES	YES	Prkar2b	MGI:97760	PRKAR2B	HGNC:9392	ENSMUSG00000002997	ENSG00000005249	19088	5577	Cluster 157	Prkar2b	PRKAR2B	IPI00224570	IPI:IPI00224570.3|SWISS-PROT:P31324|TREMBL:A2CG31;Q3V2X9|ENSEMBL:ENSMUSP00000003079;ENSMUSP00000039797|REFSEQ:NP_035288|VEGA:OTTMUSP00000018450;OTTMUSP00000018451 Tax_Id=10090 Gene_Symbol=Prkar2b cAMP-dependent protein kinase type II-beta regulatory subun	P31324	IPI00554752	IPI:IPI00554752.2|SWISS-PROT:P31323|TREMBL:A4D0R9;O60380;Q6DHZ2;Q75MP1|ENSEMBL:ENSP00000265717|REFSEQ:NP_002727|H-INV:HIT000195404|VEGA:OTTHUMP00000025511;OTTHUMP00000064467;OTTHUMP00000174592 Tax_Id=9606 Gene_Symbol=PRKAR2B cAMP-dependent protein kinase	P31323		20	9	15	17	YES	YES
ab16moc_293	YES	YES	Prkar2a	MGI:108025	PRKAR2A	HGNC:9391	ENSMUSG00000032601	ENSG00000114302	19087	5576	Cluster 252	Prkar2a	PRKAR2A	IPI00169788	IPI:IPI00169788.1|TREMBL:Q8K1M3|ENSEMBL:ENSMUSP00000035220|REFSEQ:NP_032950 Tax_Id=10090 Gene_Symbol=Prkar2a CAMP-dependent protein kinase type II-alpha regulatory chain	Q8K1M3	IPI00219774	IPI:IPI00219774.3|SWISS-PROT:P13861|ENSEMBL:ENSP00000265563|REFSEQ:NP_004148|H-INV:HIT000321476|VEGA:OTTHUMP00000041191;OTTHUMP00000164821 Tax_Id=9606 Gene_Symbol=PRKAR2A cAMP-dependent protein kinase type II-alpha regulatory subunit	P13861		16	10	12	12	YES	YES
ab16moc_84	YES	YES	Rapgef4	MGI:1917723	RAPGEF4	HGNC:16626	ENSMUSG00000049044	ENSG00000091428	56508	11069	Cluster 288	Rapgef4	RAPGEF4	IPI00323505	IPI:IPI00323505.4|SWISS-PROT:Q9EQZ6-3|TREMBL:A2ASH6|ENSEMBL:ENSMUSP00000028525;ENSMUSP00000099759|REFSEQ:NP_062662|VEGA:OTTMUSP00000014141 Tax_Id=10090 Gene_Symbol=Rapgef4 Isoform 3 of Rap guanine nucleotide exchange factor 4	Q9EQZ6	IPI00329560	IPI:IPI00329560.5|SWISS-PROT:Q8WZA2-1|TREMBL:Q53TH3|ENSEMBL:ENSP00000264111|REFSEQ:NP_008954|H-INV:HIT000058910|VEGA:OTTHUMP00000068667;OTTHUMP00000165043 Tax_Id=9606 Gene_Symbol=RAPGEF4 Isoform 1 of Rap guanine nucleotide exchange factor 4	Q8WZA2		37	27	29	16	YES	YES
ab16moc_1200	YES	YES	Car4	MGI:1096574	CA4	HGNC:1375	ENSMUSG00000000805	ENSG00000167434	12351	762	Cluster 1437, Cluster 705	Car4	CA4	IPI00134476	IPI:IPI00134476.2|SWISS-PROT:Q64444|TREMBL:Q3U3I1;Q5SS51|ENSEMBL:ENSMUSP00000000822;ENSMUSP00000099483|REFSEQ:NP_031633|VEGA:OTTMUSP00000001000 Tax_Id=10090 Gene_Symbol=Car4 NOD-derived CD11c +ve dendritic cells cDNA, RIKEN full-length enriched library, c	Q64444	IPI00027466	IPI:IPI00027466.1|SWISS-PROT:P22748|TREMBL:Q6FHI7|ENSEMBL:ENSP00000300900|REFSEQ:NP_000708|H-INV:HIT000259730|VEGA:OTTHUMP00000181751 Tax_Id=9606 Gene_Symbol=CA4 Carbonic anhydrase 4 precursor	P22748		3	3	3	2	YES	YES
ab16moc_562	YES	YES	Stub1	MGI:1891731	STUB1	HGNC:11427	ENSMUSG00000039615	ENSG00000103266	56424	10273	Cluster 516	Stub1	STUB1	IPI00471361	IPI:IPI00471361.3|SWISS-PROT:Q9WUD1|TREMBL:Q3TYJ0|ENSEMBL:ENSMUSP00000040431|REFSEQ:NP_062693 Tax_Id=10090 Gene_Symbol=Stub1 STIP1 homology and U box-containing protein 1	Q9WUD1	IPI00025156	IPI:IPI00025156.4|SWISS-PROT:Q9UNE7-1|TREMBL:A2IDB9|ENSEMBL:ENSP00000219548|REFSEQ:NP_005852|H-INV:HIT000074213|VEGA:OTTHUMP00000041758;OTTHUMP00000081542;OTTHUMP00000082509;OTTHUMP00000149944 Tax_Id=9606 Gene_Symbol=STUB1 Isoform 1 of STIP1 homology and	Q9UNE7		8	6	4	3	YES
ab16moc_595	YES	YES	Csnk1d	MGI:1355272	CSNK1D	HGNC:2452	ENSMUSG00000025162	ENSG00000141551	104318	1453	Cluster 745	Csnk1d	CSNK1D	IPI00761242	IPI:IPI00761242.1|SWISS-PROT:Q9DC28-1|TREMBL:A2ABP1|ENSEMBL:ENSMUSP00000018274|REFSEQ:NP_620690|VEGA:OTTMUSP00000004584 Tax_Id=10090 Gene_Symbol=Csnk1d Isoform 1 of Casein kinase I isoform delta	Q9DC28	IPI00011102	IPI:IPI00011102.2|SWISS-PROT:P48730-1|ENSEMBL:ENSP00000324464|REFSEQ:NP_001884|VEGA:OTTHUMP00000180807 Tax_Id=9606 Gene_Symbol=CSNK1D Isoform 1 of Casein kinase I isoform delta	P48730		8	5	5	7	YES
ab16moc_655	YES	YES	Csnk1e	MGI:1351660	CSNK1E	HGNC:2453	ENSMUSG00000022433	ENSG00000213923	27373	1454	Cluster 829	Csnk1e	CSNK1E	IPI00321396	IPI:IPI00321396.1|SWISS-PROT:Q9JMK2|TREMBL:Q8CBH9;Q9QUI3|ENSEMBL:ENSMUSP00000078266|REFSEQ:NP_038795 Tax_Id=10090 Gene_Symbol=Csnk1e Casein kinase I isoform epsilon	Q9JMK2	IPI00027729	IPI:IPI00027729.1|SWISS-PROT:P49674|TREMBL:Q53EZ1;Q5U045|ENSEMBL:ENSP00000352929|REFSEQ:NP_001885;NP_689407|H-INV:HIT000270456|VEGA:OTTHUMP00000028770;OTTHUMP00000063258;OTTHUMP00000063259;OTTHUMP00000063260 Tax_Id=9606 Gene_Symbol=CSNK1E Casein kinase I	P49674		7	6	4	4	YES
ab16moc_201	YES	YES	Ctnnd1	MGI:105100	CTNND1	HGNC:2515	ENSMUSG00000034101	ENSG00000198561	12388	1500	Cluster 607	Ctnnd1	CTNND1	IPI00403823	IPI:IPI00403823.1|TREMBL:Q80XQ4|ENSEMBL:ENSMUSP00000064518|REFSEQ:NP_001078919;NP_031641|VEGA:OTTMUSP00000014428;OTTMUSP00000014429 Tax_Id=10090 Gene_Symbol=Ctnnd1 catenin, delta 1 isoform 1	Q80XQ4	IPI00219873	IPI:IPI00219873.1|SWISS-PROT:O60716-7 Tax_Id=9606 Gene_Symbol=CTNND1 Isoform 1C of Catenin delta-1	O60716		22	15	10	17	YES	YES
ab16moc_109	YES	YES	Ctnnd2	MGI:1195966	CTNND2	HGNC:2516	ENSMUSG00000022240	ENSG00000169862	18163	1501	Cluster 381	Ctnnd2	CTNND2	IPI00136135	IPI:IPI00136135.1|SWISS-PROT:O35927-1|ENSEMBL:ENSMUSP00000080427|REFSEQ:NP_032755 Tax_Id=10090 Gene_Symbol=Ctnnd2 Isoform 1 of Catenin delta-2	O35927	IPI00220032	IPI:IPI00220032.2|SWISS-PROT:Q9UQB3-2|ENSEMBL:ENSP00000352661 Tax_Id=9606 Gene_Symbol=CTNND2 Isoform 2 of Catenin delta-2	Q9UQB3		33	26	25	25	YES	YES
ab16moc_200	YES	YES	Sept3	MGI:1345148	SEPT3	HGNC:10750	ENSMUSG00000022456	ENSG00000100167	24050	55964	Cluster 74	Sept3	SEPT3	IPI00845776	IPI:IPI00845776.1|SWISS-PROT:Q9Z1S5-1 Tax_Id=10090 Gene_Symbol=Sept3 Isoform 1 of Neuronal-specific septin-3	Q9Z1S5	IPI00745056	IPI:IPI00745056.1|SWISS-PROT:Q9UH03-2|ENSEMBL:ENSP00000291236|REFSEQ:NP_061979|VEGA:OTTHUMP00000028742;OTTHUMP00000067303 Tax_Id=9606 Gene_Symbol=SEPT3 Isoform 2 of Neuronal-specific septin-3	Q9UH03		22	16	13	15	YES	YES
ab16moc_81	YES	YES	Sept9	MGI:1858222	SEPT9	HGNC:7323	ENSMUSG00000059248	ENSG00000184640	53860	10801	Cluster 81	Sept9	SEPT9	IPI00515330	IPI:IPI00515330.1|SWISS-PROT:Q80UG5-3|TREMBL:A2A6U2|VEGA:OTTMUSP00000004044 Tax_Id=10090 Gene_Symbol=Sept9 Isoform 3 of Septin-9	Q80UG5	IPI00784808	IPI:IPI00784808.1|SWISS-PROT:Q9UHD8-5|VEGA:OTTHUMP00000068640 Tax_Id=9606 Gene_Symbol=SEPT9 Isoform 5 of Septin-9	Q9UHD8		38	33	27	34	YES	YES
ab16moc_392	YES	YES	Vcp	MGI:99919	VCP	HGNC:12666	ENSMUSG00000028452	ENSG00000165280	269523	7415	Cluster 879	Vcp	VCP	IPI00622235	IPI:IPI00622235.5|SWISS-PROT:Q01853|TREMBL:Q8BNF8|ENSEMBL:ENSMUSP00000030164|REFSEQ:NP_033529|VEGA:OTTMUSP00000007079 Tax_Id=10090 Gene_Symbol=Vcp Transitional endoplasmic reticulum ATPase	Q01853	IPI00022774	IPI:IPI00022774.3|SWISS-PROT:P55072|TREMBL:Q0IIN5;Q0V924;Q5VYM0;Q96IF9;Q9HAP0;Q9HAP1;Q9NTC4|ENSEMBL:ENSP00000367954|REFSEQ:NP_009057|H-INV:HIT000001855|VEGA:OTTHUMP00000021322;OTTHUMP00000021326 Tax_Id=9606 Gene_Symbol=VCP Transitional endoplasmic reticul	P55072		12	9	6	5	YES	YES
ab16moc_431	YES	YES	Git1	MGI:1927140	GIT1	HGNC:4272	ENSMUSG00000011877	ENSG00000108262	216963	28964	Cluster 886	Git1	GIT1	IPI00470095	IPI:IPI00470095.1|SWISS-PROT:Q68FF6|ENSEMBL:ENSMUSP00000037210|REFSEQ:NP_001004144|VEGA:OTTMUSP00000008532 Tax_Id=10090 Gene_Symbol=Git1 ARF GTPase-activating protein GIT1	Q68FF6	IPI00384861	IPI:IPI00384861.3|SWISS-PROT:Q9Y2X7-1|TREMBL:Q6NWZ0|ENSEMBL:ENSP00000225394|REFSEQ:NP_054749|VEGA:OTTHUMP00000041875;OTTHUMP00000163605 Tax_Id=9606 Gene_Symbol=GIT1 Isoform 1 of ARF GTPase-activating protein GIT1	Q9Y2X7		11	6	8	10	YES	YES
ab16moc_90	YES	YES	Pde2a	MGI:2446107	PDE2A	HGNC:8777	ENSMUSG00000030653	ENSG00000186642	207728	5138	Cluster 233	Pde2a	PDE2A	IPI00762623	IPI:IPI00762623.1|TREMBL:Q3TCR8;Q3TD37;Q5PR72|ENSEMBL:ENSMUSP00000081956|REFSEQ:NP_001008548 Tax_Id=10090 Gene_Symbol=Pde2a phosphodiesterase 2A, cGMP-stimulated	Q3TCR8	IPI00451132	IPI:IPI00451132.2|SWISS-PROT:O00408|TREMBL:Q5J793;Q8IW54|ENSEMBL:ENSP00000334910|REFSEQ:NP_002590|H-INV:HIT000221019|VEGA:OTTHUMP00000067927;OTTHUMP00000128215 Tax_Id=9606 Gene_Symbol=PDE2A cGMP-dependent 3',5'-cyclic phosphodiesterase	O00408		36	26	25	24	YES	YES
ab16moc_29	YES	YES	Dlg2	MGI:1344351	DLG2	HGNC:2901	ENSMUSG00000052572	ENSG00000150672	23859	1740	Cluster 73	Dlg2	DLG2	IPI00226727	IPI:IPI00226727.4|SWISS-PROT:Q91XM9-2|VEGA:OTTMUSP00000018436 Tax_Id=10090 Gene_Symbol=Dlg2 Isoform 2 of Discs large homolog 2	Q91XM9	IPI00647950	IPI:IPI00647950.1|SWISS-PROT:Q15700-2|ENSEMBL:ENSP00000365272|VEGA:OTTHUMP00000165971 Tax_Id=9606 Gene_Symbol=DLG2 Isoform 2 of Discs large homolog 2	Q15700		60	44	44	47	YES	YES
ab16moc_183	YES	YES	Tcp1	MGI:98535	TCP1	HGNC:11655	ENSMUSG00000068039	ENSG00000120438	21454	6950	Cluster 229	Tcp1	TCP1	IPI00459493	IPI:IPI00459493.5|SWISS-PROT:P11983-1|TREMBL:Q62289;Q62290;Q62291;Q6LBL9;Q9QZ33;Q9QZ34|ENSEMBL:ENSMUSP00000086418|REFSEQ:NP_038714 Tax_Id=10090 Gene_Symbol=Tcp1 Isoform 1 of T-complex protein 1 subunit alpha B	P11983	IPI00290566	IPI:IPI00290566.1|SWISS-PROT:P17987|ENSEMBL:ENSP00000317334|REFSEQ:NP_110379|H-INV:HIT000292987|VEGA:OTTHUMP00000017528;OTTHUMP00000017529 Tax_Id=9606 Gene_Symbol=TCP1 T-complex protein 1 subunit alpha	P17987		23	17	13	22	YES	YES
ab16moc_254	YES	YES	Cct2	MGI:107186	CCT2	HGNC:1615	ENSMUSG00000034024	ENSG00000166226	12461	10576	Cluster 394	Cct2	CCT2	IPI00320217	IPI:IPI00320217.9|SWISS-PROT:P80314|TREMBL:Q542X7|ENSEMBL:ENSMUSP00000036288|REFSEQ:NP_031662 Tax_Id=10090 Gene_Symbol=Cct2 T-complex protein 1 subunit beta	P80314	IPI00297779	IPI:IPI00297779.7|SWISS-PROT:P78371|TREMBL:Q9H369|ENSEMBL:ENSP00000299300|REFSEQ:NP_006422|H-INV:HIT000062801|VEGA:OTTHUMP00000041617;OTTHUMP00000168452 Tax_Id=9606 Gene_Symbol=CCT2 T-complex protein 1 subunit beta	P78371		18	12	10	14	YES	YES
ab16moc_186	YES	YES	Cct4	MGI:104689	CCT4	HGNC:1617	ENSMUSG00000007739	ENSG00000115484	12464	10575	Cluster 194	Cct4	CCT4	IPI00116277	IPI:IPI00116277.3|SWISS-PROT:P80315|TREMBL:Q3TII0;Q3UJZ8;Q5M6Y2|ENSEMBL:ENSMUSP00000020562|REFSEQ:NP_033967|VEGA:OTTMUSP00000005437 Tax_Id=10090 Gene_Symbol=Cct4 T-complex protein 1 subunit delta	P80315	IPI00302927	IPI:IPI00302927.6|SWISS-PROT:P50991|ENSEMBL:ENSP00000233836|REFSEQ:NP_006421|H-INV:HIT000062814|VEGA:OTTHUMP00000041008 Tax_Id=9606 Gene_Symbol=CCT4 T-complex protein 1 subunit delta	P50991		23	13	15	17	YES	YES
ab16moc_294	YES	YES	Cct5	MGI:107185	CCT5	HGNC:1618	ENSMUSG00000022234	ENSG00000150753	12465	22948	Cluster 353	Cct5	CCT5	IPI00116279	IPI:IPI00116279.3|SWISS-PROT:P80316|ENSEMBL:ENSMUSP00000022842|REFSEQ:NP_031663 Tax_Id=10090 Gene_Symbol=Cct5 T-complex protein 1 subunit epsilon	P80316	IPI00010720	IPI:IPI00010720.1|SWISS-PROT:P48643|TREMBL:Q96GI1;Q9BU08;Q9HB74|ENSEMBL:ENSP00000280326|REFSEQ:NP_036205|H-INV:HIT000095964|VEGA:OTTHUMP00000041253;OTTHUMP00000161671 Tax_Id=9606 Gene_Symbol=CCT5 T-complex protein 1 subunit epsilon	P48643		16	12	7	12	YES	YES
ab16moc_365	YES	YES	Cct7	MGI:107184	CCT7	HGNC:1622	ENSMUSG00000030007	ENSG00000135624	12468	10574	Cluster 409	Cct7	CCT7	IPI00331174	IPI:IPI00331174.5|SWISS-PROT:P80313|TREMBL:Q3TET0;Q3THH8;Q3TIJ7;Q3TJN2;Q3UDB1;Q3UIJ0;Q8C5Q5|ENSEMBL:ENSMUSP00000032078|REFSEQ:NP_031664 Tax_Id=10090 Gene_Symbol=Cct7 T-complex protein 1 subunit eta	P80313	IPI00018465	IPI:IPI00018465.1|SWISS-PROT:Q99832|TREMBL:Q53HV2;Q6IBT3|ENSEMBL:ENSP00000258091|REFSEQ:NP_006420|H-INV:HIT000266185|VEGA:OTTHUMP00000041016 Tax_Id=9606 Gene_Symbol=CCT7 T-complex protein 1 subunit eta	Q99832		13	11	10	10	YES	YES
ab16moc_153	YES	YES	Cct3	MGI:104708	CCT3	HGNC:1616	ENSMUSG00000001416	ENSG00000163468	12462	7203	Cluster 183	Cct3	CCT3	IPI00116283	IPI:IPI00116283.1|SWISS-PROT:P80318|TREMBL:Q3TBM6;Q3U0I3;Q3U4U6;Q3UJP4;Q9R1U1|ENSEMBL:ENSMUSP00000001452|REFSEQ:NP_033966 Tax_Id=10090 Gene_Symbol=Cct3 T-complex protein 1 subunit gamma	P80318	IPI00553185	IPI:IPI00553185.2|SWISS-PROT:P49368|TREMBL:Q2TU64;Q59H77|ENSEMBL:ENSP00000357244|REFSEQ:NP_005989|H-INV:HIT000028109|VEGA:OTTHUMP00000025735;OTTHUMP00000060343 Tax_Id=9606 Gene_Symbol=CCT3 T-complex protein 1 subunit gamma	P49368		27	16	16	25	YES	YES
ab16moc_197	YES	YES	Cct8	MGI:107183	CCT8	HGNC:1623	ENSMUSG00000025613	ENSG00000156261	12469	10694	Cluster 265	Cct8	CCT8	IPI00469268	IPI:IPI00469268.5|SWISS-PROT:P42932|TREMBL:Q3UKQ2;Q3UL22;Q6A0F1;Q8BVY8;Q9CRW7;Q9CS06;Q9WVS5|ENSEMBL:ENSMUSP00000026704|REFSEQ:NP_033970 Tax_Id=10090 Gene_Symbol=Cct8 T-complex protein 1 subunit theta	P42932	IPI00302925	IPI:IPI00302925.3|TREMBL:Q53HU0|ENSEMBL:ENSP00000286788|VEGA:OTTHUMP00000096462;OTTHUMP00000122419 Tax_Id=9606 Gene_Symbol=CCT8 Chaperonin containing TCP1, subunit 8 (Theta) variant	Q53HU0		22	14	13	21	YES	YES
ab16moc_273	YES	YES	Cct6a	MGI:107943	CCT6A	HGNC:1620	ENSMUSG00000029447	ENSG00000146731	12466	908	Cluster 311	Cct6a	CCT6A	IPI00116281	IPI:IPI00116281.3|SWISS-PROT:P80317|TREMBL:Q3TI05;Q3TI62;Q3TIX8;Q3TW97;Q52KG9;Q8VEI1|ENSEMBL:ENSMUSP00000031402|REFSEQ:NP_033968 Tax_Id=10090 Gene_Symbol=Cct6a T-complex protein 1 subunit zeta	P80317	IPI00027626	IPI:IPI00027626.3|SWISS-PROT:P40227|TREMBL:A1JUI8;Q59ET3|ENSEMBL:ENSP00000275603|REFSEQ:NP_001753|H-INV:HIT000078722|VEGA:OTTHUMP00000024460;OTTHUMP00000067820;OTTHUMP00000159736 Tax_Id=9606 Gene_Symbol=CCT6A T-complex protein 1 subunit zeta	P40227		17	10	4	13	YES	YES
ab16moc_816	YES	YES	Cct6b	MGI:1329013	CCT6B	HGNC:1621	ENSMUSG00000020698	ENSG00000132141	12467	10693	Cluster 1104	Cct6b	CCT6B	IPI00321816	IPI:IPI00321816.6|SWISS-PROT:Q61390|TREMBL:Q5SVB9;Q8BVT1|ENSEMBL:ENSMUSP00000021040|REFSEQ:NP_033969|VEGA:OTTMUSP00000000849 Tax_Id=10090 Gene_Symbol=Cct6b T-complex protein 1 subunit zeta-2	Q61390	IPI00220656	IPI:IPI00220656.4|SWISS-PROT:Q92526|ENSEMBL:ENSP00000327191|REFSEQ:NP_006575|H-INV:HIT000040276|VEGA:OTTHUMP00000181085 Tax_Id=9606 Gene_Symbol=CCT6B T-complex protein 1 subunit zeta-2	Q92526		5	4		5
ab16moc_337	YES	YES	Hspd1	MGI:96242	HSPD1	HGNC:5261	ENSMUSG00000025980	ENSG00000144381	15510	3329	Cluster 234	Hspd1	HSPD1	IPI00308885	IPI:IPI00308885.6|SWISS-PROT:P63038-1|ENSEMBL:ENSMUSP00000027123|REFSEQ:NP_034607|VEGA:OTTMUSP00000024365 Tax_Id=10090 Gene_Symbol=Hspd1 Isoform 1 of 60 kDa heat shock protein, mitochondrial precursor	P63038	IPI00784154	IPI:IPI00784154.1|SWISS-PROT:P10809|TREMBL:Q53QD5|ENSEMBL:ENSP00000373618;ENSP00000373619;ENSP00000373620|REFSEQ:NP_002147;NP_955472|H-INV:HIT000031088|VEGA:OTTHUMP00000068935 Tax_Id=9606 Gene_Symbol=HSPD1 60 kDa heat shock protein, mitochondrial precurso	P10809		14	10	8	9	YES	YES
ab16moc_948	YES	YES	Chmp1a	MGI:1920159	CHMP1A	HGNC:8740	ENSMUSG00000000743	ENSG00000131165	234852	5119	Cluster 773	Chmp1a	CHMP1A	IPI00122318	IPI:IPI00122318.3|SWISS-PROT:Q921W0|ENSEMBL:ENSMUSP00000000759|REFSEQ:NP_663581 Tax_Id=10090 Gene_Symbol=Chmp1a Charged multivesicular body protein 1a	Q921W0	IPI00382452	IPI:IPI00382452.1|SWISS-PROT:Q9HD42-1|TREMBL:A2RU09|REFSEQ:NP_002759|VEGA:OTTHUMP00000081351;OTTHUMP00000107342 Tax_Id=9606 Gene_Symbol=CHMP1A Isoform 1 of Charged multivesicular body protein 1a	Q9HD42		4	4	2	3	YES
ab16moc_61	YES	YES	Cit	MGI:105313	CIT	HGNC:1985	ENSMUSG00000029516	ENSG00000122966	12704	11113	Cluster 491	Cit	CIT	IPI00406762	IPI:IPI00756265.1|VEGA:OTTMUSP00000015603 Tax_Id=10090 Gene_Symbol=Cit Protein	P49025	IPI00607850	IPI:IPI00607850.1|SWISS-PROT:O14578-3 Tax_Id=9606 Gene_Symbol=CIT Isoform 3 of Citron Rho-interacting kinase	O14578		43	31	26	31	YES	YES
ab16moc_242	YES	YES	Clasp1	MGI:1923957	CLASP1	HGNC:17088	ENSMUSG00000064302	ENSG00000074054	76707	23332	Cluster 1088	Clasp1	CLASP1	IPI00669522	IPI:IPI00669522.2|SWISS-PROT:Q80TV8-2|REFSEQ:XP_900475;XP_927185 Tax_Id=10090 Gene_Symbol=Clasp1 CLASP1 isoform 3	Q80TV8	IPI00396279	IPI:IPI00396279.3|SWISS-PROT:Q7Z460-1|ENSEMBL:ENSP00000263710|REFSEQ:NP_056097|H-INV:HIT000242913 Tax_Id=9606 Gene_Symbol=CLASP1 Isoform 1 of CLIP-associating protein 1	Q7Z460		19	12	9	10	YES
ab16moc_48	YES	YES	Clasp2	MGI:1923749	CLASP2	HGNC:17078	ENSMUSG00000033392	ENSG00000163539	76499	23122	Cluster 294	Clasp2	CLASP2	IPI00407863	IPI:IPI00407863.5|SWISS-PROT:Q8BRT1-1|TREMBL:Q08EB5;Q3UF57;Q8R337|ENSEMBL:ENSMUSP00000035089|REFSEQ:NP_083909 Tax_Id=10090 Gene_Symbol=Clasp2 Clasp2 protein	Q8BRT1	IPI00024382	IPI:IPI00024382.4|SWISS-PROT:O75122-1|ENSEMBL:ENSP00000304743|REFSEQ:NP_055912|H-INV:HIT000000352|VEGA:OTTHUMP00000170594 Tax_Id=9606 Gene_Symbol=CLASP2 CLIP-associating protein 2	O75122		49	42	27	30	YES	YES
ab16moc_1320	YES	YES	Ap1s1	MGI:1098244	AP1S1	HGNC:559	ENSMUSG00000004849	ENSG00000106367	11769	1174	Cluster 1245	Ap1s1	AP1S1	IPI00118026	IPI:IPI00118026.1|SWISS-PROT:P61967|ENSEMBL:ENSMUSP00000004971|REFSEQ:NP_031483 Tax_Id=10090 Gene_Symbol=Ap1s1 AP-1 complex subunit sigma-1A	P61967	IPI00152898	IPI:IPI00152898.1|SWISS-PROT:P61966-1|ENSEMBL:ENSP00000336666|REFSEQ:NP_001274|H-INV:HIT000271400 Tax_Id=9606 Gene_Symbol=AP1S1 Isoform 1 of AP-1 complex subunit sigma-1A	P61966		2	2	2	2	YES	YES
ab16moc_1088	YES	YES	Ap3m2	MGI:1929214	AP3M2	HGNC:570	ENSMUSG00000031539	ENSG00000070718	64933	10947	Cluster 1741	Ap3m2	AP3M2	IPI00124286	IPI:IPI00124286.2|SWISS-PROT:Q8R2R9|TREMBL:Q3TRH5|ENSEMBL:ENSMUSP00000060342|REFSEQ:NP_083781 Tax_Id=10090 Gene_Symbol=Ap3m2 AP-3 complex subunit mu-2	Q8R2R9	IPI00022883	IPI:IPI00022883.1|SWISS-PROT:P53677|TREMBL:Q7Z472|ENSEMBL:ENSP00000174653|REFSEQ:NP_006794|H-INV:HIT000057001|VEGA:OTTHUMP00000177428 Tax_Id=9606 Gene_Symbol=AP3M2 AP-3 complex subunit mu-2	P53677		3			2
ab16moc_649	YES	YES	Ap2s1	MGI:2141861	AP2S1	HGNC:565	ENSMUSG00000008036	ENSG00000042753	232910	1175	Cluster 238	Ap2s1	AP2S1	IPI00118022	IPI:IPI00118022.1|SWISS-PROT:P62743|TREMBL:Q3UJ76;Q7TT10|ENSEMBL:ENSMUSP00000083281|REFSEQ:NP_941015 Tax_Id=10090 Gene_Symbol=Ap2s1 AP-2 complex subunit sigma-1	P62743	IPI00219840	IPI:IPI00219840.4|SWISS-PROT:P53680-1|ENSEMBL:ENSP00000263270|REFSEQ:NP_004060|H-INV:HIT000288877|VEGA:OTTHUMP00000069146;OTTHUMP00000076095 Tax_Id=9606 Gene_Symbol=AP2S1 Isoform 1 of AP-2 complex subunit sigma-1	P53680		7	5	3	6	YES	YES
ab16moc_346	YES	YES	Snap91	MGI:109132	SNAP91	HGNC:14986	ENSMUSG00000033419	ENSG00000065609	20616	9892	Cluster 730	Snap91	SNAP91	IPI00122409	IPI:IPI00122409.1|SWISS-PROT:Q61548-1|TREMBL:Q7TT20;Q8CHE0|ENSEMBL:ENSMUSP00000074066|REFSEQ:NP_038697 Tax_Id=10090 Gene_Symbol=Snap91 Isoform Long of Clathrin coat assembly protein AP180	Q61548	IPI00006612	IPI:IPI00006612.2|SWISS-PROT:O60641-1|ENSEMBL:ENSP00000195649;ENSP00000358708|REFSEQ:NP_055656|H-INV:HIT000000381|VEGA:OTTHUMP00000016794;OTTHUMP00000016798 Tax_Id=9606 Gene_Symbol=SNAP91 Isoform 1 of Clathrin coat assembly protein AP180	O60641		14	12	10	5	YES	YES
ab16moc_121	YES	YES	Ap2m1	MGI:1298405	AP2M1	HGNC:564	ENSMUSG00000022841	ENSG00000161203	11773	1173	Cluster 59	Ap2m1	AP2M1	IPI00116356	IPI:IPI00116356.5|SWISS-PROT:P84091|TREMBL:Q3TH69;Q3UCW9;Q5FWI9;Q6A0C9|ENSEMBL:ENSMUSP00000007216|REFSEQ:NP_033809 Tax_Id=10090 Gene_Symbol=Ap2m1 AP-2 complex subunit mu-1	P84091	IPI00022256	IPI:IPI00022256.3|SWISS-PROT:Q96CW1|ENSEMBL:ENSP00000292807|REFSEQ:NP_004059|H-INV:HIT000014490 Tax_Id=9606 Gene_Symbol=AP2M1 AP-2 complex subunit mu-1	Q96CW1		32	23	18	18	YES	YES
ab16moc_18	YES	YES	Cltc	MGI:2388633	CLTC	HGNC:2092	ENSMUSG00000047126	ENSG00000141367	67300	1213	Cluster 142	Cltc	CLTC	IPI00169916	IPI:IPI00169916.11|SWISS-PROT:Q68FD5|TREMBL:Q3TAN1;Q3TJ98;Q3TYQ2;Q3U0H2;Q3UPJ3;Q8K2I5|ENSEMBL:ENSMUSP00000099475|REFSEQ:NP_001003908|VEGA:OTTMUSP00000001191 Tax_Id=10090 Gene_Symbol=Cltc Clathrin heavy chain	Q68FD5	IPI00455383	IPI:IPI00455383.4|SWISS-PROT:Q00610-2|VEGA:OTTHUMP00000165785;OTTHUMP00000181744 Tax_Id=9606 Gene_Symbol=CLTC Isoform 2 of Clathrin heavy chain 1	Q00610		70	61	49	52	YES	YES
ab16moc_633	YES	YES	Clta	MGI:894297	CLTA	HGNC:2090	ENSMUSG00000028478	ENSG00000122705	12757	1211	Cluster 384	Clta	CLTA	IPI00648658	IPI:IPI00648658.1|TREMBL:A2AJ56|REFSEQ:NP_001073855|VEGA:OTTMUSP00000007657 Tax_Id=10090 Gene_Symbol=Clta clathrin, light polypeptide (Lca) isoform d	A2AJ56	IPI00790571	IPI:IPI00790571.2|SWISS-PROT:P09496-3|REFSEQ:NP_001070145 Tax_Id=9606 Gene_Symbol=CLTA Isoform 3 of Clathrin light chain A	P09496		7	5	5	6	YES
ab16moc_483	YES	YES	Cltb	MGI:1921575	CLTB	HGNC:2091	ENSMUSG00000047547	ENSG00000175416	74325	1212	Cluster 174	Cltb	CLTB	IPI00554923	IPI:IPI00554923.1|SWISS-PROT:Q6IRU5-2|TREMBL:A2VCP8;Q3TJ95;Q3TWZ9|ENSEMBL:ENSMUSP00000089198|REFSEQ:NP_083146 Tax_Id=10090 Gene_Symbol=Cltb Isoform 2 of Clathrin light chain B	Q6IRU5	IPI00216472	IPI:IPI00216472.1|SWISS-PROT:P09497-2|TREMBL:Q53Y37|ENSEMBL:ENSP00000310812|REFSEQ:NP_001825|VEGA:OTTHUMP00000161246 Tax_Id=9606 Gene_Symbol=CLTB Isoform Non-brain of Clathrin light chain B	P09497		10	9	5	3	YES
ab16moc_554	YES	YES	Clu	MGI:88423	CLU	HGNC:2095	ENSMUSG00000022037	ENSG00000120885	12759	1191	Cluster 801	Clu	CLU	IPI00320420	IPI:IPI00320420.3|SWISS-PROT:Q06890|TREMBL:Q3V245;Q549A5|ENSEMBL:ENSMUSP00000022616|REFSEQ:NP_038520 Tax_Id=10090 Gene_Symbol=Clu Clusterin precursor	Q06890	IPI00291262	IPI:IPI00291262.3|SWISS-PROT:P10909|TREMBL:Q2TU75|REFSEQ:NP_976084|VEGA:OTTHUMP00000042515;OTTHUMP00000042517;OTTHUMP00000042521;OTTHUMP00000177302;OTTHUMP00000177303 Tax_Id=9606 Gene_Symbol=CLU Clusterin precursor	P10909		8	7	3	2	YES	YES
ab16moc_1058	YES	YES	Copa	MGI:1334462	COPA	HGNC:2230	ENSMUSG00000026553	ENSG00000122218	12847	1314	Cluster 2284	Copa	COPA	IPI00761529	IPI:IPI00761529.1|TREMBL:Q8CIE6|ENSEMBL:ENSMUSP00000027833 Tax_Id=10090 Gene_Symbol=Copa Coatomer protein complex subunit alpha	Q8CIE6	IPI00646493	IPI:IPI00646493.1|TREMBL:Q8IXZ9|ENSEMBL:ENSP00000357048|VEGA:OTTHUMP00000031846 Tax_Id=9606 Gene_Symbol=COPA COPA protein	Q8IXZ9		3	2	2
ab16moc_34	YES	YES	Cntn1	MGI:105980	CNTN1	HGNC:2171	ENSMUSG00000055022	ENSG00000018236	12805	1272	Cluster 85	Cntn1	CNTN1	IPI00123058	IPI:IPI00123058.1|SWISS-PROT:P12960|ENSEMBL:ENSMUSP00000000109;ENSMUSP00000067842|REFSEQ:NP_031753|VEGA:OTTMUSP00000015953;OTTMUSP00000015954 Tax_Id=10090 Gene_Symbol=Cntn1 Contactin-1 precursor	P12960	IPI00216641	IPI:IPI00216641.1|SWISS-PROT:Q12860-2|ENSEMBL:ENSP00000261160|REFSEQ:NP_778203|VEGA:OTTHUMP00000167145 Tax_Id=9606 Gene_Symbol=CNTN1 Isoform 2 of Contactin-1 precursor	Q12860		58	51	49	42	YES	YES
ab16moc_228	YES	YES	Cntn2	MGI:104518	CNTN2	HGNC:2172	ENSMUSG00000053024	ENSG00000184144	21367	6900	Cluster 637	Cntn2	CNTN2	IPI00119970	IPI:IPI00119970.4|SWISS-PROT:Q61330|TREMBL:Q3UH39|ENSEMBL:ENSMUSP00000083707|REFSEQ:NP_796103 Tax_Id=10090 Gene_Symbol=Cntn2 Contactin-2 precursor	Q61330	IPI00024966	IPI:IPI00024966.1|SWISS-PROT:Q02246|TREMBL:A1L3A3|ENSEMBL:ENSP00000330633|REFSEQ:NP_005067|H-INV:HIT000322876|VEGA:OTTHUMP00000035179;OTTHUMP00000060845 Tax_Id=9606 Gene_Symbol=CNTN2 Contactin-2 precursor	Q02246		20	15	12	13	YES	YES
ab16moc_232	YES	YES	Cntnap1	MGI:1858201	CNTNAP1	HGNC:8011	ENSMUSG00000017167	ENSG00000108797	53321	8506	Cluster 923	Cntnap1	CNTNAP1	IPI00338983	IPI:IPI00338983.2|SWISS-PROT:O54991|TREMBL:A2A4K6;Q3U428|ENSEMBL:ENSMUSP00000017311;ENSMUSP00000099398|REFSEQ:NP_058062|VEGA:OTTMUSP00000002577 Tax_Id=10090 Gene_Symbol=Cntnap1 Contactin-associated protein 1 precursor	O54991	IPI00219249	IPI:IPI00219249.4|SWISS-PROT:P78357|ENSEMBL:ENSP00000264638|REFSEQ:NP_003623|H-INV:HIT000222017|VEGA:OTTHUMP00000181222 Tax_Id=9606 Gene_Symbol=CNTNAP1 Contactin-associated protein 1 precursor	P78357		19	13	18	16	YES	YES
ab16moc_535	YES	YES	Cntnap2	MGI:1914047	CNTNAP2	HGNC:13830	ENSMUSG00000039419	ENSG00000174469	66797	26047	Cluster 1680	Cntnap2	CNTNAP2	IPI00420554	IPI:IPI00420554.2|SWISS-PROT:Q9CPW0-1|ENSEMBL:ENSMUSP00000064082|REFSEQ:NP_001004357|VEGA:OTTMUSP00000025482 Tax_Id=10090 Gene_Symbol=Cntnap2 Isoform 1 of Contactin-associated protein-like 2 precursor	Q9CPW0	IPI00029343	IPI:IPI00029343.2|SWISS-PROT:Q9UHC6-1|TREMBL:O75852;Q75LG9;Q75MA1;Q75MD4;Q75MF8;Q75MQ9;Q86UI8;Q86UJ1;Q86UL4;Q86UL6;Q86UL9;Q96T77;Q96T80;Q9UDV4|ENSEMBL:ENSP00000354778|REFSEQ:NP_054860|H-INV:HIT000077314|VEGA:OTTHUMP00000024440 Tax_Id=9606 Gene_Symbol=CNTN	Q9UHC6		9	7	6	2	YES
ab16moc_1268	YES	YES	Cpne5	MGI:2385908	CPNE5	HGNC:2318	ENSMUSG00000024008	ENSG00000124772	240058	57699	Cluster 1361	Cpne5	CPNE5	IPI00170387	IPI:IPI00170387.1|SWISS-PROT:Q8JZW4|ENSEMBL:ENSMUSP00000024805|REFSEQ:NP_694806 Tax_Id=10090 Gene_Symbol=Cpne5 Copine-5	Q8JZW4	IPI00030532	IPI:IPI00030532.1|SWISS-PROT:Q9HCH3|TREMBL:Q658T3;Q7Z6C8|ENSEMBL:ENSP00000244751|REFSEQ:NP_065990|H-INV:HIT000001314|VEGA:OTTHUMP00000016296;OTTHUMP00000039675 Tax_Id=9606 Gene_Symbol=CPNE5 Copine-5	Q9HCH3		2			1		YES
ab16moc_680	YES	YES	Coro1a	MGI:1345961	CORO1A	HGNC:2252	ENSMUSG00000030707	ENSG00000102879	12721	11151	Cluster 256	Coro1a	CORO1A	IPI00323600	IPI:IPI00323600.4|SWISS-PROT:O89053|TREMBL:Q3T9L1;Q3U1N0;Q3U232;Q3U9K3|ENSEMBL:ENSMUSP00000032949|REFSEQ:NP_034028 Tax_Id=10090 Gene_Symbol=Coro1a Coronin-1A	O89053	IPI00010133	IPI:IPI00010133.3|SWISS-PROT:P31146|ENSEMBL:ENSP00000219150|REFSEQ:NP_009005|H-INV:HIT000080810|VEGA:OTTHUMP00000080374;OTTHUMP00000108842;OTTHUMP00000163017 Tax_Id=9606 Gene_Symbol=CORO1A Coronin-1A	P31146		6	1	3	4		YES
ab16moc_1066	YES	YES	Coro1b	MGI:1345963	CORO1B	HGNC:2253	ENSMUSG00000024835	ENSG00000172725	23789	57175	Cluster 1591	Coro1b	CORO1B	IPI00124819	IPI:IPI00124819.1|SWISS-PROT:Q9WUM3|TREMBL:A2RS22|ENSEMBL:ENSMUSP00000008893|REFSEQ:NP_035908 Tax_Id=10090 Gene_Symbol=Coro1b Coronin-1B	Q9WUM3	IPI00007058	IPI:IPI00007058.1|SWISS-PROT:Q9BR76|TREMBL:Q9NSK3|ENSEMBL:ENSP00000340211|REFSEQ:NP_001018080;NP_065174|H-INV:HIT000271232 Tax_Id=9606 Gene_Symbol=CORO1B;PTPRCAP Coronin-1B	Q9BR76		3	2	2	2	YES
ab16moc_274	YES	YES	Coro1c	MGI:1345964	CORO1C	HGNC:2254	ENSMUSG00000004530	ENSG00000110880	23790	23603	Cluster 317	Coro1c	CORO1C	IPI00124820	IPI:IPI00124820.2|SWISS-PROT:Q9WUM4|TREMBL:Q3TEU8;Q3TF74;Q3U8F0;Q3UA51;Q499X7;Q5PPQ7|ENSEMBL:ENSMUSP00000004646|REFSEQ:NP_035909 Tax_Id=10090 Gene_Symbol=Coro1c Coronin-1C	Q9WUM4	IPI00008453	IPI:IPI00008453.3|SWISS-PROT:Q9ULV4|TREMBL:Q53G58;Q59EA2|ENSEMBL:ENSP00000261401|REFSEQ:NP_055140|H-INV:HIT000026240|VEGA:OTTHUMP00000169110;OTTHUMP00000169111 Tax_Id=9606 Gene_Symbol=CORO1C Coronin-1C	Q9ULV4		17	9	13	13	YES	YES
ab16moc_829	YES	YES	Coro2a	MGI:1345966	CORO2A	HGNC:2255	ENSMUSG00000028337	ENSG00000106789	107684	7464	Cluster 717	Coro2a	CORO2A	IPI00309623	IPI:IPI00309623.1|SWISS-PROT:Q8C0P5|TREMBL:A2AGH0;Q3U8R5;Q3U8X0;Q3UAX0;Q8BLN0;Q8R0L6|ENSEMBL:ENSMUSP00000030021|REFSEQ:NP_849224|VEGA:OTTMUSP00000007346 Tax_Id=10090 Gene_Symbol=Coro2a Coronin-2A	Q8C0P5	IPI00023736	IPI:IPI00023736.2|SWISS-PROT:Q92828|TREMBL:Q5TBR5|ENSEMBL:ENSP00000343746;ENSP00000364218|REFSEQ:NP_438171|H-INV:HIT000035377|VEGA:OTTHUMP00000021767;OTTHUMP00000021768;OTTHUMP00000063767 Tax_Id=9606 Gene_Symbol=CORO2A Coronin-2A	Q92828		5	3	2	4	YES
ab16moc_258	YES	YES	Coro2b	MGI:2444283	CORO2B	HGNC:2256	ENSMUSG00000041729	ENSG00000103647	235431	10391	Cluster 232	Coro2b	CORO2B	IPI00221725	IPI:IPI00221725.1|SWISS-PROT:Q8BH44|ENSEMBL:ENSMUSP00000041826|REFSEQ:NP_780693 Tax_Id=10090 Gene_Symbol=Coro2b Coronin-2B	Q8BH44	IPI00298912	IPI:IPI00298912.7|SWISS-PROT:Q9UQ03|ENSEMBL:ENSP00000261861|REFSEQ:NP_006082|H-INV:HIT000000642|VEGA:OTTHUMP00000164389;OTTHUMP00000175917 Tax_Id=9606 Gene_Symbol=CORO2B Coronin-2B	Q9UQ03		18	13	16	14	YES	YES
ab16moc_384	YES	YES	Ckb	MGI:88407	CKB	HGNC:1991	ENSMUSG00000001270	ENSG00000166165	12709	1152	Cluster 102	Ckb	CKB	IPI00136703	IPI:IPI00136703.1|SWISS-PROT:Q04447|ENSEMBL:ENSMUSP00000001304|REFSEQ:NP_067248 Tax_Id=10090 Gene_Symbol=Ckb Creatine kinase B-type	Q04447	IPI00022977	IPI:IPI00022977.1|SWISS-PROT:P12277|TREMBL:Q6FG40|ENSEMBL:ENSP00000299198|REFSEQ:NP_001814|H-INV:HIT000034729|VEGA:OTTHUMP00000028370;OTTHUMP00000043509 Tax_Id=9606 Gene_Symbol=CKB Creatine kinase B-type	P12277		12	9	11	6	YES	YES
ab16moc_117	YES	YES	Ckmt1	MGI:99441	CKMT1B	HGNC:1995	ENSMUSG00000000308	ENSG00000168775	12716	1159	Cluster 48	Ckmt1a	CKMT1A	IPI00128296	IPI:IPI00128296.1|SWISS-PROT:P30275|TREMBL:Q545N7|ENSEMBL:ENSMUSP00000000317;ENSMUSP00000077349|REFSEQ:NP_034027|VEGA:OTTMUSP00000016245;OTTMUSP00000016246 Tax_Id=10090 Gene_Symbol=Ckmt1 Creatine kinase, ubiquitous mitochondrial precursor	P30275	IPI00658109	IPI:IPI00658109.1|SWISS-PROT:P12532|ENSEMBL:ENSP00000300283;ENSP00000338496;ENSP00000371113;ENSP00000371122;ENSP00000371275|REFSEQ:NP_001015001;NP_066270|H-INV:HIT000278706;HIT000295739|VEGA:OTTHUMP00000066270;OTTHUMP00000066271;OTTHUMP00000066275;OTTHUMP	P12532		32	24	24	25	YES	YES
ab16moc_646	YES	YES	Gak	MGI:2442153	GAK	HGNC:4113	ENSMUSG00000062234	ENSG00000178950	231580	2580	Cluster 1969	Gak	GAK	IPI00620823	IPI:IPI00620823.2|SWISS-PROT:Q99KY4-2 Tax_Id=10090 Gene_Symbol=Gak Isoform 2 of Cyclin G-associated kinase	Q99KY4	IPI00787531	IPI:IPI00787531.1|REFSEQ:XP_001127411 Tax_Id=9606 Gene_Symbol=GAK similar to Cyclin G-associated kinase	Q99KY4		7	6	6	1
ab16moc_175	YES	YES	Clip2	MGI:1313136	CLIP2	HGNC:2586	ENSMUSG00000063146	ENSG00000106665	269713	7461	Cluster 596	Clip2	CLIP2	IPI00467854	IPI:IPI00467854.1|SWISS-PROT:Q9Z0H8-1|ENSEMBL:ENSMUSP00000098212|REFSEQ:NP_034120 Tax_Id=10090 Gene_Symbol=Clip2 Isoform 1 of CAP-Gly domain-containing linker protein 2	Q9Z0H8	IPI00019642	IPI:IPI00019642.1|SWISS-PROT:Q9UDT6-1|ENSEMBL:ENSP00000223398|REFSEQ:NP_003379|VEGA:OTTHUMP00000024598;OTTHUMP00000160724 Tax_Id=9606 Gene_Symbol=CLIP2 Isoform 1 of CAP-Gly domain-containing linker protein 2	Q9UDT6		24	18	14	12	YES	YES
ab16moc_910	YES	YES	Uqcrfs1	MGI:1913944	UQCRFS1	HGNC:12587	ENSMUSG00000038462	ENSG00000169021	66694	7386	Cluster 1004	Uqcrfs1	UQCRFSL1	IPI00133240	IPI:IPI00133240.1|SWISS-PROT:Q9CR68|ENSEMBL:ENSMUSP00000045284|REFSEQ:NP_079986|VEGA:OTTMUSP00000000615 Tax_Id=10090 Gene_Symbol=Uqcrfs1 Ubiquinol-cytochrome c reductase iron-sulfur subunit, mitochondrial precursor	Q9CR68	IPI00026964	IPI:IPI00026964.2|SWISS-PROT:P47985|ENSEMBL:ENSP00000306397|REFSEQ:NP_005994|H-INV:HIT000034755|VEGA:OTTHUMP00000067988;OTTHUMP00000078230 Tax_Id=9606 Gene_Symbol=UQCRFS1 Ubiquinol-cytochrome c reductase iron-sulfur subunit, mitochondrial precursor	P47985		4	3	4	2	YES
ab16moc_725	YES	YES	Cox5a	MGI:88474	COX5A	HGNC:2267	ENSMUSG00000000088	ENSG00000178741	12858	9377	Cluster 262	Cox5a	COX5A	IPI00120719	IPI:IPI00120719.3|SWISS-PROT:P12787 Tax_Id=10090 Gene_Symbol=Cox5a Cytochrome c oxidase subunit 5A, mitochondrial precursor	P12787	IPI00025086	IPI:IPI00025086.3|SWISS-PROT:P20674|TREMBL:Q71UP1;Q8TB65|ENSEMBL:ENSP00000317780|REFSEQ:NP_004246|H-INV:HIT000194859|VEGA:OTTHUMP00000176493 Tax_Id=9606 Gene_Symbol=COX5A Cytochrome c oxidase subunit 5A, mitochondrial precursor	P20674		6	5	6	5	YES	YES
ab16moc_806	YES	YES	Cox6b1	MGI:107460	COX6B1	HGNC:2280	ENSMUSG00000036751	ENSG00000126267	110323	1340	Cluster 228	Cox6b1	COX6B1	IPI00225390	IPI:IPI00225390.5|SWISS-PROT:P56391|ENSEMBL:ENSMUSP00000075150|REFSEQ:NP_079904 Tax_Id=10090 Gene_Symbol=Cox6b1 Cytochrome c oxidase subunit VIb isoform 1	P56391	IPI00216085	IPI:IPI00216085.3|SWISS-PROT:P14854|ENSEMBL:ENSP00000246554|REFSEQ:NP_001854|H-INV:HIT000030070|VEGA:OTTHUMP00000069664;OTTHUMP00000076299 Tax_Id=9606 Gene_Symbol=COX6B1 Cytochrome c oxidase subunit VIb isoform 1	P14854		5	5	4	3	YES	YES
ab16moc_715	YES	YES	Cox4i1	MGI:88473	COX4I1	HGNC:2265	ENSMUSG00000031818	ENSG00000131143	12857	1327	Cluster 291	Cox4i1	COX4I1	IPI00117978	IPI:IPI00117978.1|SWISS-PROT:P19783|TREMBL:A2RSV8|ENSEMBL:ENSMUSP00000034276|REFSEQ:NP_034071 Tax_Id=10090 Gene_Symbol=Cox4i1 Cytochrome c oxidase subunit 4 isoform 1, mitochondrial precursor	P19783	IPI00006579	IPI:IPI00006579.1|SWISS-PROT:P13073|TREMBL:Q6P666|ENSEMBL:ENSP00000253452|REFSEQ:NP_001852|H-INV:HIT000222217|VEGA:OTTHUMP00000080377;OTTHUMP00000107466;OTTHUMP00000175004 Tax_Id=9606 Gene_Symbol=COX4I1 Cytochrome c oxidase subunit 4 isoform 1, mitochondr	P13073		6	6	4	6	YES
ab16moc_1048	YES	YES	Cox5b	MGI:88475	COX5B	HGNC:2269	ENSMUSG00000061518	ENSG00000135940	12859	1329	Cluster 477	Cox5b	COX5B	IPI00785410	IPI:IPI00785410.1|SWISS-PROT:P19536 Tax_Id=10090 Gene_Symbol=Cox5b Cytochrome c oxidase subunit 5B, mitochondrial precursor	P19536	IPI00021785	IPI:IPI00021785.2|SWISS-PROT:P10606|TREMBL:Q53YB7;Q6FHJ9;Q6FHM4|ENSEMBL:ENSP00000258424|REFSEQ:NP_001853|H-INV:HIT000032686|VEGA:OTTHUMP00000161109 Tax_Id=9606 Gene_Symbol=COX5B Cytochrome c oxidase subunit 5B, mitochondrial precursor	P10606		3	3	2	3	YES	YES
ab16moc_1134	YES	YES	Cox7a2l	MGI:106015	COX7A2L	HGNC:2289	ENSMUSG00000024248	ENSG00000115944	20463	9167	Cluster 586	Cox7a2l	COX7A2L	IPI00115949	IPI:IPI00115949.1|TREMBL:Q3U7R2;Q99KD6|ENSEMBL:ENSMUSP00000082686|REFSEQ:XP_001004846;XP_899358;XP_977700;XP_977744 Tax_Id=10090 Gene_Symbol=EG629383;Cox7a2l Cox7a2l protein	Q3U7R2	IPI00022421	IPI:IPI00022421.2|SWISS-PROT:O14548|TREMBL:Q6FGA0|ENSEMBL:ENSP00000234301;ENSP00000367938|REFSEQ:NP_004709|H-INV:HIT000017778|VEGA:OTTHUMP00000158765 Tax_Id=9606 Gene_Symbol=COX7A2L Cytochrome c oxidase subunit VIIa-related protein, mitochondrial precurso	O14548		3	3	1	1		YES
ab16moc_1344	YES	YES	Cyth2	MGI:1334255	CYTH2	HGNC:9502	ENSMUSG00000003269	ENSG00000105443	19158	9266	Cluster 2096	Pscd2	PSCD2	IPI00128134	IPI:IPI00128134.1|SWISS-PROT:P63034-1|TREMBL:Q5HZZ0;Q99KH2|ENSEMBL:ENSMUSP00000051423|REFSEQ:NP_035311 Tax_Id=10090 Gene_Symbol=Pscd2 Isoform 1 of Cytohesin-2	P63034	IPI00183778	IPI:IPI00183778.5|SWISS-PROT:Q99418-2|TREMBL:Q15795|ENSEMBL:ENSP00000314566|REFSEQ:NP_004219|H-INV:HIT000278747|VEGA:OTTHUMP00000069223;OTTHUMP00000077876 Tax_Id=9606 Gene_Symbol=PSCD2 Isoform 2 of Cytohesin-2	Q99418		2	2	2			YES
ab16moc_1318	YES	YES	Cyth3	MGI:1335107	CYTH3	HGNC:9504	ENSMUSG00000018001	ENSG00000008256	19159	9265	Cluster 2129	Pscd3	PSCD3	IPI00272148	IPI:IPI00272148.5|SWISS-PROT:O08967|TREMBL:Q3TGW1;Q3TXK1;Q5DTF5;Q8CBE4;Q922J4|ENSEMBL:ENSMUSP00000018145|REFSEQ:NP_035312 Tax_Id=10090 Gene_Symbol=Pscd3 Cytohesin-3	O08967	IPI00013892	IPI:IPI00013892.1|SWISS-PROT:O43739-1 Tax_Id=9606 Gene_Symbol=PSCD3 Isoform 1 of Cytohesin-3	O43739		2	2	2	2	YES	YES
ab16moc_33	YES	YES	Dync1h1	MGI:103147	DYNC1H1	HGNC:2961	ENSMUSG00000018707	ENSG00000197102	13424	1778	Cluster 648	Dync1h1	DYNC1H1	IPI00119876	IPI:IPI00119876.1|SWISS-PROT:Q9JHU4|TREMBL:O08821;O70182;Q3TAZ3;Q3UA73;Q80U36;Q8C6T5;Q8R0Q4;Q923F5|ENSEMBL:ENSMUSP00000018851|REFSEQ:NP_084514 Tax_Id=10090 Gene_Symbol=Dync1h1 Dynein heavy chain, cytosolic	Q9JHU4	IPI00456969	IPI:IPI00456969.1|SWISS-PROT:Q14204|ENSEMBL:ENSP00000348965|REFSEQ:NP_001367|H-INV:HIT000000031|VEGA:OTTHUMP00000028119;OTTHUMP00000065399 Tax_Id=9606 Gene_Symbol=DYNC1H1 Dynein heavy chain, cytosolic	Q14204		58	45	30	25	YES	YES
ab16moc_430	YES	YES	Phgdh	MGI:1355330	PHGDH	HGNC:8923	ENSMUSG00000053398	ENSG00000092621	236539	26227	Cluster 587	Phgdh	PHGDH	IPI00225961	IPI:IPI00225961.5|SWISS-PROT:Q61753|ENSEMBL:ENSMUSP00000064755|REFSEQ:NP_058662;XP_001003532 Tax_Id=10090 Gene_Symbol=LOC673015;Phgdh D-3-phosphoglycerate dehydrogenase	Q61753	IPI00011200	IPI:IPI00011200.5|SWISS-PROT:O43175|ENSEMBL:ENSP00000358417|REFSEQ:NP_006614|H-INV:HIT000035203|VEGA:OTTHUMP00000013926;OTTHUMP00000059532 Tax_Id=9606 Gene_Symbol=PHGDH D-3-phosphoglycerate dehydrogenase	O43175		11	8	7	3	YES	YES
ab16moc_1260	YES	YES	Des	MGI:94885	DES	HGNC:2770	ENSMUSG00000026208	ENSG00000175084	13346	1674	Cluster 821	Des	DES	IPI00130102	IPI:IPI00130102.4|SWISS-PROT:P31001|TREMBL:Q3V1K9;Q3V2C6;Q9JJY2|ENSEMBL:ENSMUSP00000027409|REFSEQ:NP_034173|VEGA:OTTMUSP00000020924 Tax_Id=10090 Gene_Symbol=Des Desmin	P31001	IPI00465084	IPI:IPI00465084.6|SWISS-PROT:P17661|TREMBL:Q45VM6;Q45VM7;Q45VM8;Q53SB5;Q549R7;Q549R8;Q9H319|ENSEMBL:ENSP00000273074;ENSP00000363071|REFSEQ:NP_001918|H-INV:HIT000041427|VEGA:OTTHUMP00000041067;OTTHUMP00000064865 Tax_Id=9606 Gene_Symbol=DES Desmin	P17661		2	2	2	2	YES
ab16moc_556	YES	YES	Cfl1	MGI:101757	CFL1	HGNC:1874	ENSMUSG00000056201	ENSG00000172757	12631	1072	Cluster 187	Cfl1	CFL1	IPI00407543	IPI:IPI00407543.2|SWISS-PROT:P18760|TREMBL:Q544Y7;Q9CX22|ENSEMBL:ENSMUSP00000064557|REFSEQ:NP_031713 Tax_Id=10090 Gene_Symbol=Cfl1 12 days embryo embryonic body between diaphragm region and neck cDNA, RIKEN full-length enriched library, clone:9430060J01 p	P18760	IPI00012011	IPI:IPI00012011.6|SWISS-PROT:P23528|ENSEMBL:ENSP00000309629|REFSEQ:NP_005498|H-INV:HIT000022544 Tax_Id=9606 Gene_Symbol=CFL1 Cofilin-1	P23528		8	6	6	6	YES	YES
ab16moc_775	YES	YES	Cfl2	MGI:101763	CFL2	HGNC:1875	ENSMUSG00000062929	ENSG00000165410	12632	1073	Cluster 272	Cfl2	CFL2	IPI00266188	IPI:IPI00266188.6|SWISS-PROT:P45591|TREMBL:Q3UHW9|ENSEMBL:ENSMUSP00000077262|REFSEQ:NP_031714 Tax_Id=10090 Gene_Symbol=Cfl2 Cofilin-2	P45591	IPI00413344	IPI:IPI00413344.3|SWISS-PROT:Q9Y281|TREMBL:Q549N0|ENSEMBL:ENSP00000298159;ENSP00000340635|REFSEQ:NP_068733;NP_619579|H-INV:HIT000071018|VEGA:OTTHUMP00000178805;OTTHUMP00000178806 Tax_Id=9606 Gene_Symbol=CFL2 Cofilin-2	Q9Y281		5		4
ab16moc_926	YES	YES	Dstn	MGI:1929270	DSTN	HGNC:15750	ENSMUSG00000015932	ENSG00000125868	56431	11034	Cluster 528	Dstn	DSTN	IPI00127942	IPI:IPI00127942.4|SWISS-PROT:Q9R0P5|TREMBL:Q4FK36|ENSEMBL:ENSMUSP00000016076;ENSMUSP00000099461|REFSEQ:NP_062745|VEGA:OTTMUSP00000003185 Tax_Id=10090 Gene_Symbol=Dstn Destrin	Q9R0P5	IPI00473014	IPI:IPI00473014.5|SWISS-PROT:P60981|ENSEMBL:ENSP00000246069|REFSEQ:NP_006861|H-INV:HIT000055966|VEGA:OTTHUMP00000030334;OTTHUMP00000030335 Tax_Id=9606 Gene_Symbol=DSTN Destrin	P60981		4	3		3		YES
ab16moc_349	YES	YES	Dgkb	MGI:2442474	DGKB	HGNC:2850	ENSMUSG00000036095	ENSG00000136267	217480	1607	Cluster 880	Dgkb	DGKB	IPI00816974	IPI:IPI00816974.1|SWISS-PROT:Q6NS52-1 Tax_Id=10090 Gene_Symbol=Dgkb Isoform 1 of Diacylglycerol kinase beta	Q6NS52	IPI00002590	IPI:IPI00002590.2|SWISS-PROT:Q9Y6T7-1|TREMBL:A4D116|ENSEMBL:ENSP00000258767|REFSEQ:NP_004071|H-INV:HIT000000443|VEGA:OTTHUMP00000025257 Tax_Id=9606 Gene_Symbol=DGKB Isoform 1 of Diacylglycerol kinase beta	Q9Y6T7		14	6	7	11	YES
ab16moc_202	YES	YES	Dlat	MGI:2385311	DLAT	HGNC:2896	ENSMUSG00000000168	ENSG00000150768	235339	1737	Cluster 275	Dlat	DLAT	IPI00153660	IPI:IPI00153660.4|SWISS-PROT:Q8BMF4|TREMBL:Q99LL2|ENSEMBL:ENSMUSP00000034567|REFSEQ:NP_663589|VEGA:OTTMUSP00000017759 Tax_Id=10090 Gene_Symbol=Dlat Dihydrolipoyllysine-residue acetyltransferase component of pyruvate dehydrogenase complex, mitochondrial pr	Q8BMF4	IPI00021338	IPI:IPI00021338.1|SWISS-PROT:P10515 Tax_Id=9606 Gene_Symbol=DLAT Dihydrolipoyllysine-residue acetyltransferase component of pyruvate dehydrogenase complex, mitochondrial precursor	P10515		22	18	10	15	YES	YES
ab16moc_809	YES	YES	Pdhx	MGI:1351627	PDHX	HGNC:21350	ENSMUSG00000010914	ENSG00000110435	27402	8050	Cluster 1350	Pdhx	PDHX	IPI00222767	IPI:IPI00222767.1|SWISS-PROT:Q8BKZ9|TREMBL:A2AWH6|ENSEMBL:ENSMUSP00000011058|REFSEQ:NP_780303|VEGA:OTTMUSP00000015743 Tax_Id=10090 Gene_Symbol=Pdhx Pyruvate dehydrogenase protein X component, mitochondrial precursor	Q8BKZ9	IPI00298423	IPI:IPI00298423.3|SWISS-PROT:O00330|ENSEMBL:ENSP00000227868|REFSEQ:NP_003468|H-INV:HIT000057557 Tax_Id=9606 Gene_Symbol=PDHX Pyruvate dehydrogenase protein X component, mitochondrial precursor	O00330		5	1		3
ab16moc_507	YES	YES	Dld	MGI:107450	DLD	HGNC:2898	ENSMUSG00000020664	ENSG00000091140	13382	1738	Cluster 687	Dld	DLD	IPI00331564	IPI:IPI00331564.2|SWISS-PROT:O08749|TREMBL:Q3TIE8|ENSEMBL:ENSMUSP00000002980|REFSEQ:NP_031887 Tax_Id=10090 Gene_Symbol=Dld TIB-55 BB88 cDNA, RIKEN full-length enriched library, clone:I730035F24 product:dihydrolipoamide dehydrogenase, full insert sequence	O08749	IPI00015911	IPI:IPI00015911.1|SWISS-PROT:P09622|ENSEMBL:ENSP00000205402|REFSEQ:NP_000099|H-INV:HIT000191161|VEGA:OTTHUMP00000025117 Tax_Id=9606 Gene_Symbol=DLD Dihydrolipoyl dehydrogenase, mitochondrial precursor	P09622		9	8	5	4	YES	YES
ab16moc_391	YES	YES	Dlst	MGI:1926170	DLST	HGNC:2911	ENSMUSG00000004789	ENSG00000119689	78920	1743	Cluster 457	Dlst	DLST	IPI00134809	IPI:IPI00134809.2|SWISS-PROT:Q9D2G2-1|ENSEMBL:ENSMUSP00000004911;ENSMUSP00000060346|REFSEQ:NP_084501 Tax_Id=10090 Gene_Symbol=Dlst Isoform 1 of Dihydrolipoyllysine-residue succinyltransferase component of 2- oxoglutarate dehydrogenase complex, mitochondri	Q9D2G2	IPI00420108	IPI:IPI00420108.4|SWISS-PROT:P36957|TREMBL:Q6IBS5;Q7LDY7|ENSEMBL:ENSP00000335304|REFSEQ:NP_001924|H-INV:HIT000029499|VEGA:OTTHUMP00000028154 Tax_Id=9606 Gene_Symbol=DLST Dihydrolipoyllysine-residue succinyltransferase component of 2- oxoglutarate dehydrog	P36957		12	11	6	6	YES	YES
ab16moc_215	YES	YES	Dpysl2	MGI:1349763	DPYSL2	HGNC:3014	ENSMUSG00000022048	ENSG00000092964	12934	1808	Cluster 127	Dpysl2	DPYSL2	IPI00114375	IPI:IPI00114375.2|SWISS-PROT:O08553|ENSEMBL:ENSMUSP00000022629|REFSEQ:NP_034085|VEGA:OTTMUSP00000017622 Tax_Id=10090 Gene_Symbol=Dpysl2 Dihydropyrimidinase-related protein 2	O08553	IPI00257508	IPI:IPI00257508.4|SWISS-PROT:Q16555|TREMBL:Q53ET2;Q59GB4;Q8NAN9|ENSEMBL:ENSP00000309539;ENSP00000369966|REFSEQ:NP_001377|H-INV:HIT000262444|VEGA:OTTHUMP00000125291;OTTHUMP00000177222;OTTHUMP00000177223 Tax_Id=9606 Gene_Symbol=DPYSL2 Dihydropyrimidinase-re	Q16555		20	16	17	17	YES	YES
ab16moc_689	YES	YES	Crmp1	MGI:107793	CRMP1	HGNC:2365	ENSMUSG00000029121	ENSG00000072832	12933	1400	Cluster 1032	Crmp1	CRMP1	IPI00312527	IPI:IPI00312527.4|SWISS-PROT:P97427|TREMBL:Q3TXY0;Q6P1J1|ENSEMBL:ENSMUSP00000031004|REFSEQ:NP_031791 Tax_Id=10090 Gene_Symbol=Crmp1 Crmp1 protein	P97427	IPI00414123	IPI:IPI00414123.4|SWISS-PROT:Q14194|TREMBL:Q4W5F1|REFSEQ:NP_001304|H-INV:HIT000029462|VEGA:OTTHUMP00000041206 Tax_Id=9606 Gene_Symbol=CRMP1 Dihydropyrimidinase-related protein 1	Q14194		6	4	5	5	YES	YES
ab16moc_767	YES	YES	Dpysl3	MGI:1349762	DPYSL3	HGNC:3015	ENSMUSG00000024501	ENSG00000113657	22240	1809	Cluster 912	Dpysl3	DPYSL3	IPI00122349	IPI:IPI00122349.1|SWISS-PROT:Q62188|TREMBL:Q3TAS8;Q3TT92|ENSEMBL:ENSMUSP00000025379|REFSEQ:NP_033494 Tax_Id=10090 Gene_Symbol=Dpysl3 Dihydropyrimidinase-related protein 3	Q62188	IPI00029111	IPI:IPI00029111.2|SWISS-PROT:Q14195|TREMBL:Q6DEN2;Q8IXW6|ENSEMBL:ENSP00000343690|REFSEQ:NP_001378|H-INV:HIT000101734 Tax_Id=9606 Gene_Symbol=DPYSL3 DPYSL3 protein	Q14195		5	3	4	4	YES	YES
ab16moc_921	YES	YES	Dpysl4	MGI:1349764	DPYSL4	HGNC:3016	ENSMUSG00000025478	ENSG00000151640	26757	10570	Cluster 1490	Dpysl4	DPYSL4	IPI00313151	IPI:IPI00313151.3|SWISS-PROT:O35098-1|TREMBL:Q3TMU8|ENSEMBL:ENSMUSP00000026551|REFSEQ:NP_036123 Tax_Id=10090 Gene_Symbol=Dpysl4 Isoform 1 of Dihydropyrimidinase-related protein 4	O35098	IPI00022388	IPI:IPI00022388.2|SWISS-PROT:O14531|ENSEMBL:ENSP00000339850|REFSEQ:NP_006417|H-INV:HIT000058087|VEGA:OTTHUMP00000020754;OTTHUMP00000020757 Tax_Id=9606 Gene_Symbol=DPYSL4 Dihydropyrimidinase-related protein 4	O14531		4		3	2		YES
ab16moc_1334	YES	YES	Gnpat	MGI:1343460	GNPAT	HGNC:4416	ENSMUSG00000031985	ENSG00000116906	14712	8443	Cluster 2585	Gnpat	GNPAT	IPI00126660	IPI:IPI00126660.1|SWISS-PROT:P98192|TREMBL:Q05DV2;Q3TKG9;Q3UBU1;Q545P6;Q8R390;Q9CT84|ENSEMBL:ENSMUSP00000034466|REFSEQ:NP_034452 Tax_Id=10090 Gene_Symbol=Gnpat Dihydroxyacetone phosphate acyltransferase	P98192	IPI00005677	IPI:IPI00005677.1|SWISS-PROT:O15228|TREMBL:Q53FI2;Q53H08;Q59EC9;Q71V38|ENSEMBL:ENSP00000355607|REFSEQ:NP_055051|H-INV:HIT000243943|VEGA:OTTHUMP00000036147;OTTHUMP00000060147 Tax_Id=9606 Gene_Symbol=GNPAT Dihydroxyacetone phosphate acyltransferase	O15228		2			2		YES
ab16moc_1288	YES	YES	Appl2	MGI:2384914	APPL2	HGNC:18242	ENSMUSG00000020263	ENSG00000136044	216190	55198	Cluster 2193	Appl2	APPL2	IPI00170083	IPI:IPI00170083.1|SWISS-PROT:Q8K3G9|TREMBL:Q3TB15;Q3TGG0;Q3TVI6;Q3U3Y3|ENSEMBL:ENSMUSP00000020500|REFSEQ:NP_660255 Tax_Id=10090 Gene_Symbol=Appl2 DCC-interacting protein 13 beta	Q8K3G9	IPI00172513	IPI:IPI00172513.3|SWISS-PROT:Q8NEU8|ENSEMBL:ENSP00000258530|REFSEQ:NP_060641|H-INV:HIT000084464|VEGA:OTTHUMP00000169024 Tax_Id=9606 Gene_Symbol=APPL2 DCC-interacting protein 13 beta	Q8NEU8		2	1	2	2
ab16moc_827	YES	YES	Dpp6	MGI:94921	DPP6	HGNC:3010	ENSMUSG00000061576	ENSG00000130226	13483	1804	Cluster 1888	Dpp6	DPP6	IPI00762083	IPI:IPI00762083.1|SWISS-PROT:Q9Z218|TREMBL:Q5U4C2;Q80VM5|ENSEMBL:ENSMUSP00000071435|REFSEQ:NP_034205 Tax_Id=10090 Gene_Symbol=Dpp6 Dipeptidyl aminopeptidase-like protein 6	Q9Z218	IPI00718942	IPI:IPI00718942.1|REFSEQ:NP_001927|VEGA:OTTHUMP00000025272 Tax_Id=9606 Gene_Symbol=DPP6 dipeptidyl-peptidase 6 isoform 2	P42658		5	5	1	2
ab16moc_529	YES	YES	Dab2ip	MGI:1916851	DAB2IP	HGNC:17294	ENSMUSG00000026883	ENSG00000136848	69601	153090	Cluster 1505	Dab2ip	DAB2IP	IPI00420622	IPI:IPI00420622.3|SWISS-PROT:Q3UHC7-1|TREMBL:A2AUX3|ENSEMBL:ENSMUSP00000088532|VEGA:OTTMUSP00000013184 Tax_Id=10090 Gene_Symbol=Dab2ip Isoform 1 of Disabled homolog 2-interacting protein	Q3UHC7	IPI00789361	IPI:IPI00789361.1|SWISS-PROT:Q5VWQ8-1|ENSEMBL:ENSP00000362887|VEGA:OTTHUMP00000064028 Tax_Id=9606 Gene_Symbol=DAB2IP Isoform 1 of Disabled homolog 2-interacting protein	Q5VWQ8		9	6	6	8	YES
ab16moc_780	YES	YES	Dip2b	MGI:2145977	DIP2B	HGNC:29284	ENSMUSG00000023026	ENSG00000066084	239667	57609	Cluster 2318	Dip2b	DIP2B	IPI00331314	IPI:IPI00331314.6|TREMBL:Q3UH60|ENSEMBL:ENSMUSP00000097777|VEGA:OTTMUSP00000021378 Tax_Id=10090 Gene_Symbol=Dip2b Adult male brain UNDEFINED_CELL_LINE cDNA, RIKEN full-length enriched library, clone:M5C1079K13 product:Hypothetical AMP-dependent synthetase	Q3UH60	IPI00465045	IPI:IPI00465045.2|TREMBL:Q8N1L5;Q96IB4;Q9P265|ENSEMBL:ENSP00000301180|REFSEQ:NP_775873|H-INV:HIT000001178|VEGA:OTTHUMP00000167463 Tax_Id=9606 Gene_Symbol=DIP2B DIP2 disco-interacting protein 2 homolog B	Q8N1L5		5		3	2		YES
ab16moc_578	YES	YES	Daam2	MGI:1923691	DAAM2	HGNC:18143	ENSMUSG00000040260	ENSG00000146122	76441	23500	Cluster 1711	Daam2	DAAM2	IPI00421126	IPI:IPI00421126.4|SWISS-PROT:Q80U19-1|TREMBL:Q6TAB7|ENSEMBL:ENSMUSP00000052085|REFSEQ:NP_001008232 Tax_Id=10090 Gene_Symbol=Daam2 dishevelled associated activator of morphogenesis 2	Q80U19	IPI00514893	IPI:IPI00514893.3|SWISS-PROT:Q86T65|TREMBL:A1A565;Q5T4T8|ENSEMBL:ENSP00000274867|REFSEQ:NP_056160|H-INV:HIT000027995|VEGA:OTTHUMP00000016351;OTTHUMP00000039777;OTTHUMP00000180661 Tax_Id=9606 Gene_Symbol=DAAM2 Disheveled-associated activator of morphogenes	Q86T65		8	7		5
ab16moc_92	YES	YES	Dlgap1	MGI:1346065	DLGAP1	HGNC:2905	ENSMUSG00000003279	ENSG00000170579	224997	9229	Cluster 296	Dlgap1	DLGAP1	IPI00649710	IPI:IPI00649710.1|SWISS-PROT:Q9D415-2|TREMBL:Q3UHD8 Tax_Id=10090 Gene_Symbol=Dlgap1 Isoform 2 of Disks large-associated protein 1	Q9D415	IPI00021941	IPI:IPI00021941.1|SWISS-PROT:O14490-1|ENSEMBL:ENSP00000316377|REFSEQ:NP_004737|H-INV:HIT000057901|VEGA:OTTHUMP00000070562;OTTHUMP00000071965;OTTHUMP00000162272 Tax_Id=9606 Gene_Symbol=DLGAP1 Isoform 1 of Disks large-associated protein 1	O14490		36	26	26	24	YES	YES
ab16moc_53	YES	YES	Dlgap2	MGI:2443181	DLGAP2	HGNC:2906	ENSMUSG00000047495	ENSG00000198010	244310	9228	Cluster 216	Dlgap2	DLGAP2	IPI00467058	IPI:IPI00467058.2|SWISS-PROT:Q8BJ42-2 Tax_Id=10090 Gene_Symbol=Dlgap2 Isoform 2 of Disks large-associated protein 2	Q8BJ42	IPI00033086	IPI:IPI00033086.4|SWISS-PROT:Q9P1A6-1|ENSEMBL:ENSP00000350614 Tax_Id=9606 Gene_Symbol=DLGAP2 Isoform 1 of Disks large-associated protein 2 (Fragment)	Q9P1A6		47	32	31	31	YES	YES
ab16moc_99	YES	YES	Dlgap3	MGI:3039563	DLGAP3	HGNC:30368	ENSMUSG00000042388	ENSG00000116544	242667	58512	Cluster 280	Dlgap3	DLGAP3	IPI00134997	IPI:IPI00134997.3|SWISS-PROT:Q6PFD5|TREMBL:Q3TY61|ENSEMBL:ENSMUSP00000039724|REFSEQ:NP_941020|VEGA:OTTMUSP00000009703 Tax_Id=10090 Gene_Symbol=Dlgap3 Disks large-associated protein 3	Q6PFD5	IPI00219434	IPI:IPI00219434.4|SWISS-PROT:O95886|ENSEMBL:ENSP00000235180;ENSP00000362444|REFSEQ:NP_001073887;XP_945918|H-INV:HIT000070783|VEGA:OTTHUMP00000004180;OTTHUMP00000046194 Tax_Id=9606 Gene_Symbol=DLGAP3 Disks large-associated protein 3	O95886		35	26	26	26	YES	YES
ab16moc_143	YES	YES	Dlgap4	MGI:2138865	DLGAP4	HGNC:24476	ENSMUSG00000061689	ENSG00000080845	228836	22839	Cluster 378	Dlgap4	DLGAP4	IPI00752220	IPI:IPI00752220.1|TREMBL:A2BDU3|VEGA:OTTMUSP00000017144 Tax_Id=10090 Gene_Symbol=Dlgap4 Discs, large homolog-associated protein 4	A2BDU3	IPI00007138	IPI:IPI00007138.2|SWISS-PROT:Q9Y2H0-1|ENSEMBL:ENSP00000363023|REFSEQ:NP_055717|H-INV:HIT000000681|VEGA:OTTHUMP00000030850;OTTHUMP00000030861 Tax_Id=9606 Gene_Symbol=DLGAP4 Isoform 1 of Disks large-associated protein 4	Q9Y2H0		29	14	21	23	YES
ab16moc_699	YES	YES	Dock1	MGI:2429765	DOCK1	HGNC:2987	ENSMUSG00000058325	ENSG00000150760	330662	1793	Cluster 2505	Dock1	DOCK1	IPI00755697	IPI:IPI00755697.2|SWISS-PROT:Q8BUR4-1|REFSEQ:NP_001028592 Tax_Id=10090 Gene_Symbol=Dock1 Isoform 1 of Dedicator of cytokinesis protein 1	Q8BUR4	IPI00015286	IPI:IPI00015286.1|SWISS-PROT:Q14185|TREMBL:Q5VXF6|ENSEMBL:ENSP00000280333|REFSEQ:NP_001371|H-INV:HIT000101645|VEGA:OTTHUMP00000020733 Tax_Id=9606 Gene_Symbol=DOCK1 Dedicator of cytokinesis protein 1	Q14185		6	5	2	2	YES
ab16moc_355	YES	YES	Dock4	MGI:1918006	DOCK4	HGNC:19192	ENSMUSG00000035954	ENSG00000128512	238130	9732	Cluster 415	Dock4	DOCK4	IPI00223070	IPI:IPI00223070.3|SWISS-PROT:P59764|TREMBL:Q8BMP2|ENSEMBL:ENSMUSP00000047387|REFSEQ:NP_766391 Tax_Id=10090 Gene_Symbol=Dock4 Dedicator of cytokinesis protein 4	P59764	IPI00784294	IPI:IPI00784294.1|TREMBL:Q149N5 Tax_Id=9606 Gene_Symbol=DOCK4 DOCK4 protein	Q149N5		14	6	9	7	YES
ab16moc_488	YES	YES	Dock3	MGI:2429763	DOCK3	HGNC:2989	ENSMUSG00000039716	ENSG00000088538	208869	1795	Cluster 2115	Dock3	DOCK3	IPI00284521	IPI:IPI00284521.8|SWISS-PROT:Q8CIQ7|TREMBL:Q3UHH9|ENSEMBL:ENSMUSP00000047652|REFSEQ:NP_700462 Tax_Id=10090 Gene_Symbol=Dock3 Dedicator of cytokinesis protein 3	Q8CIQ7	IPI00217985	IPI:IPI00217985.1|SWISS-PROT:Q8IZD9|TREMBL:A3KMG4|ENSEMBL:ENSP00000266037|REFSEQ:NP_004938|H-INV:HIT000251235|VEGA:OTTHUMP00000171362 Tax_Id=9606 Gene_Symbol=DOCK3 Dedicator of cytokinesis protein 3	Q8IZD9		10	9	8	5	YES
ab16moc_1045	YES	YES	Dock10	MGI:2146320	DOCK10	HGNC:23479	ENSMUSG00000038608	ENSG00000135905	210293	55619	Cluster 2403	Dock10	DOCK10	IPI00337028	IPI:IPI00337028.3|SWISS-PROT:Q8BZN6-2|ENSEMBL:ENSMUSP00000077099|REFSEQ:XP_981520 Tax_Id=10090 Gene_Symbol=Dock10 Isoform 2 of Dedicator of cytokinesis protein 10	Q8BZN6	IPI00333770	IPI:IPI00333770.6|SWISS-PROT:Q96BY6-1|TREMBL:Q3LIC8;Q4ZG60;Q68DA4|ENSEMBL:ENSP00000258390|REFSEQ:NP_055504 Tax_Id=9606 Gene_Symbol=DOCK10 Isoform 1 of Dedicator of cytokinesis protein 10	Q96BY6		3	2	1	2		YES
ab16moc_621	YES	YES	Dock9	MGI:106321	DOCK9	HGNC:14132	ENSMUSG00000025558	ENSG00000088387	105445	23348	Cluster 2052	Dock9	DOCK9	IPI00752102	IPI:IPI00752102.1|REFSEQ:XP_981120 Tax_Id=10090 Gene_Symbol=Dock9 similar to Dedicator of cytokinesis protein 9 (Cdc42 guanine nucleotide exchange factor zizimin 1) isoform 30	Q8BIK4	IPI00151888	IPI:IPI00151888.4|SWISS-PROT:Q9BZ29-1|REFSEQ:NP_056111|H-INV:HIT000081253|VEGA:OTTHUMP00000040724 Tax_Id=9606 Gene_Symbol=DOCK9 Isoform 1 of Dedicator of cytokinesis protein 9	Q9BZ29		7	5	6			YES
ab16moc_1089	YES	YES	Dpm1	MGI:1330239	DPM1	HGNC:3005	ENSMUSG00000078919	ENSG00000000419	13480	8813	Cluster 1072	Dpm1	DPM1	IPI00115668	IPI:IPI00115668.1|SWISS-PROT:O70152|TREMBL:A2BDX1|ENSEMBL:ENSMUSP00000096671|REFSEQ:NP_034202|VEGA:OTTMUSP00000017164 Tax_Id=10090 Gene_Symbol=Dpm1 Dolichol-phosphate mannosyltransferase	O70152	IPI00022018	IPI:IPI00022018.1|SWISS-PROT:O60762|TREMBL:Q6IB78;Q96HK0|ENSEMBL:ENSP00000360644|REFSEQ:NP_003850|H-INV:HIT000033031|VEGA:OTTHUMP00000031277;OTTHUMP00000031285 Tax_Id=9606 Gene_Symbol=DPM1 Dolichol-phosphate mannosyltransferase	O60762		3			2
ab16moc_955	YES	YES	Ddost	MGI:1194508	DDOST	HGNC:2728	ENSMUSG00000028757	ENSG00000117242	13200	1650	Cluster 1481	Ddost	DDOST	IPI00117705	IPI:IPI00117705.1|SWISS-PROT:O54734 Tax_Id=10090 Gene_Symbol=Ddost Dolichyl-diphosphooligosaccharide--protein glycosyltransferase 48 kDa subunit precursor	O54734	IPI00297084	IPI:IPI00297084.7|SWISS-PROT:P39656|TREMBL:Q5VWA5|ENSEMBL:ENSP00000364188|REFSEQ:NP_005207|H-INV:HIT000042202|VEGA:OTTHUMP00000002882;OTTHUMP00000044650 Tax_Id=9606 Gene_Symbol=DDOST dolichyl-diphosphooligosaccharide-protein glycosyltransferase precursor	P39656		4	3	4	2	YES
ab16moc_1349	YES	YES	Dad1	MGI:101912	DAD1	HGNC:2664	ENSMUSG00000022174	ENSG00000129562	13135	1603	Cluster 902	Dad1	DAD1	IPI00109082	IPI:IPI00109082.3|SWISS-PROT:P61804|ENSEMBL:ENSMUSP00000022781|REFSEQ:NP_034145 Tax_Id=10090 Gene_Symbol=Dad1 Dolichyl-diphosphooligosaccharide--protein glycosyltransferase subunit DAD1	P61804	IPI00009407	IPI:IPI00009407.8|SWISS-PROT:P61803|TREMBL:Q53G02|ENSEMBL:ENSP00000250498|REFSEQ:NP_001335|H-INV:HIT000100570|VEGA:OTTHUMP00000043430;OTTHUMP00000164488 Tax_Id=9606 Gene_Symbol=DAD1 Dolichyl-diphosphooligosaccharide--protein glycosyltransferase subunit DA	P61803		2	2
ab16moc_142	YES	YES	Dbn1	MGI:1931838	DBN1	HGNC:2695	ENSMUSG00000034675	ENSG00000113758	56320	1627	Cluster 225	Dbn1	DBN1	IPI00135475	IPI:IPI00135475.3|SWISS-PROT:Q9QXS6-1|TREMBL:A2CG16|ENSEMBL:ENSMUSP00000050477|VEGA:OTTMUSP00000018533 Tax_Id=10090 Gene_Symbol=Dbn1 Isoform A of Drebrin	Q9QXS6	IPI00794221	IPI:IPI00794221.1|VEGA:OTTHUMP00000165798 Tax_Id=9606 Gene_Symbol=DBN1 76 kDa protein	A8MV58		29	16	20	22	YES	YES
ab16moc_918	YES	YES	Dbnl	MGI:700006	DBNL	HGNC:2696	ENSMUSG00000020476	ENSG00000136279	13169	28988	Cluster 1468	Dbnl	DBNL	IPI00378015	IPI:IPI00378015.1|SWISS-PROT:Q62418-1|TREMBL:Q5NCI5|VEGA:OTTMUSP00000005312 Tax_Id=10090 Gene_Symbol=Dbnl Isoform 1 of Drebrin-like protein	Q62418	IPI00101968	IPI:IPI00101968.3|SWISS-PROT:Q9UJU6-3|ENSEMBL:ENSP00000258780 Tax_Id=9606 Gene_Symbol=DBNL Isoform 3 of Drebrin-like protein	Q9UJU6		4	1	3			YES
ab16moc_334	YES	YES	Dctn1	MGI:107745	DCTN1	HGNC:2711	ENSMUSG00000031865	ENSG00000204843	13191	1639	Cluster 573	Dctn1	DCTN1	IPI00115663	IPI:IPI00115663.1|SWISS-PROT:O08788|TREMBL:Q3T9V8;Q3TB96;Q3TRF1;Q3TZG7;Q6NZM3|ENSEMBL:ENSMUSP00000076623|REFSEQ:NP_031861 Tax_Id=10090 Gene_Symbol=Dctn1 Dynactin subunit 1	O08788	IPI00029485	IPI:IPI00029485.2|SWISS-PROT:Q14203-1|TREMBL:Q6MZZ3|ENSEMBL:ENSP00000354791|REFSEQ:NP_004073|VEGA:OTTHUMP00000160423 Tax_Id=9606 Gene_Symbol=DCTN1 Isoform p150 of Dynactin subunit 1	Q14203		14	10	10	4	YES	YES
ab16moc_427	YES	YES	Dnm1l	MGI:1921256	DNM1L	HGNC:2973	ENSMUSG00000022789	ENSG00000087470	74006	10059	Cluster 324	Dnm1l	DNM1L	IPI00556723	IPI:IPI00556723.1|SWISS-PROT:Q8K1M6-1|TREMBL:Q3U4P3|ENSEMBL:ENSMUSP00000093944 Tax_Id=10090 Gene_Symbol=Dnm1l Isoform 1 of Dynamin-1-like protein	Q8K1M6	IPI00146935	IPI:IPI00146935.4|SWISS-PROT:O00429-1|TREMBL:Q59GN9|ENSEMBL:ENSP00000266481|REFSEQ:NP_036192|H-INV:HIT000061579|VEGA:OTTHUMP00000167109 Tax_Id=9606 Gene_Symbol=DNM1L Isoform 1 of Dynamin-1-like protein	O00429		11	8	7	5	YES	YES
ab16moc_173	YES	YES	Dnm3	MGI:1341299	DNM3	HGNC:29125	ENSMUSG00000040265	ENSG00000197959	103967	26052	Cluster 131	Dnm3	DNM3	IPI00625738	IPI:IPI00625738.2|TREMBL:Q8BWW6;Q8R3T9|ENSEMBL:ENSMUSP00000064538 Tax_Id=10090 Gene_Symbol=Dnm3 12 days embryo spinal cord cDNA, RIKEN full-length enriched library, clone:C530045C17 product:DYNAMIN 3 (EC 3.6.1.50) (DYNAMIN, TESTICULAR) (T-DYNAMIN) homolog	Q8BWW6	IPI00221332	IPI:IPI00221332.7|TREMBL:Q5W128|ENSEMBL:ENSP00000347457;ENSP00000356704|VEGA:OTTHUMP00000032877 Tax_Id=9606 Gene_Symbol=DNM3 Dynamin 3	Q5W128		24	13	15	18	YES	YES
ab16moc_581	YES	YES	Dync1i1	MGI:107743	DYNC1I1	HGNC:2963	ENSMUSG00000029757	ENSG00000158560	13426	1780	Cluster 1018	Dync1i1	DYNC1I1	IPI00226946	IPI:IPI00226946.1|SWISS-PROT:O88485-2 Tax_Id=10090 Gene_Symbol=Dync1i1 Isoform 1B of Cytoplasmic dynein 1 intermediate chain 1	O88485	IPI00022461	IPI:IPI00022461.1|SWISS-PROT:O14576-1|TREMBL:A4D1I7;Q75MI9;Q8TBF7|ENSEMBL:ENSP00000320130|REFSEQ:NP_004402|VEGA:OTTHUMP00000024696;OTTHUMP00000065364 Tax_Id=9606 Gene_Symbol=DYNC1I1 Isoform 1 of Cytoplasmic dynein 1 intermediate chain 1	O14576		8	6	3	4	YES	YES
ab16moc_786	YES	YES	Dync1i2	MGI:107750	DYNC1I2	HGNC:2964	ENSMUSG00000027012	ENSG00000077380	13427	1781	Cluster 1585	Dync1i2	DYNC1I2	IPI00131086	IPI:IPI00131086.1|SWISS-PROT:O88487|TREMBL:A2BFF7;Q3UDA2|ENSEMBL:ENSMUSP00000080410|REFSEQ:NP_034194|VEGA:OTTMUSP00000014162;OTTMUSP00000018980 Tax_Id=10090 Gene_Symbol=Dync1i2 Cytoplasmic dynein 1 intermediate chain 2	O88487	IPI00412601	IPI:IPI00412601.3|SWISS-PROT:Q13409-4|TREMBL:Q53SA6;Q9H5W7|ENSEMBL:ENSP00000350692 Tax_Id=9606 Gene_Symbol=DYNC1I2 Isoform 2D of Cytoplasmic dynein 1 intermediate chain 2	Q13409		5	3	2	4	YES
ab16moc_662	YES	YES	Dmwd	MGI:94907	DMWD	HGNC:2936	ENSMUSG00000030410	ENSG00000185800	13401	1762	Cluster 1256	Dmwd	DMWD	IPI00118428	IPI:IPI00118428.1|SWISS-PROT:Q08274|TREMBL:Q5HZG7;Q8K0I9|ENSEMBL:ENSMUSP00000032570|REFSEQ:NP_034188 Tax_Id=10090 Gene_Symbol=Dmwd Dystrophia myotonica WD repeat-containing protein	Q08274	IPI00796018	IPI:IPI00796018.1|SWISS-PROT:Q09019|ENSEMBL:ENSP00000270223|REFSEQ:NP_004934|H-INV:HIT000192330|VEGA:OTTHUMP00000069101 Tax_Id=9606 Gene_Symbol=DMWD dystrophia myotonica-containing WD repeat motif protein	Q09019		7	7	3	4	YES
ab16moc_398	YES	YES	Enpp6	MGI:2445171	ENPP6	HGNC:23409	ENSMUSG00000038173	ENSG00000164303	320981	133121	Cluster 419	Enpp6	ENPP6	IPI00308077	IPI:IPI00308077.5|SWISS-PROT:Q8BGN3|ENSEMBL:ENSMUSP00000044608|REFSEQ:NP_796278 Tax_Id=10090 Gene_Symbol=Enpp6 Ectonucleotide pyrophosphatase/phosphodiesterase family member 6 precursor	Q8BGN3	IPI00157414	IPI:IPI00157414.3|SWISS-PROT:Q6UWR7|TREMBL:Q4W5Q1|ENSEMBL:ENSP00000296741|REFSEQ:NP_699174|H-INV:HIT000051313 Tax_Id=9606 Gene_Symbol=ENPP6 Ectonucleotide pyrophosphatase/phosphodiesterase family member 6 precursor	Q6UWR7		12	8	9	8	YES	YES
ab16moc_1109	YES	YES	Ehd4	MGI:1919619	EHD4	HGNC:3245	ENSMUSG00000027293	ENSG00000103966	98878	30844	Cluster 2003	Ehd4	EHD4	IPI00318671	IPI:IPI00318671.2|SWISS-PROT:Q9EQP2|TREMBL:Q1MWP8;Q1MWP9;Q3TM70;Q3TQ74;Q3TWP9;Q91VL7|ENSEMBL:ENSMUSP00000028755|REFSEQ:NP_598599|VEGA:OTTMUSP00000016279 Tax_Id=10090 Gene_Symbol=Ehd4 EH-domain containing 4-KJR (Fragment)	Q9EQP2	IPI00005578	IPI:IPI00005578.1|SWISS-PROT:Q9H223|ENSEMBL:ENSP00000220325|REFSEQ:NP_644670|H-INV:HIT000053694|VEGA:OTTHUMP00000160905;OTTHUMP00000176211 Tax_Id=9606 Gene_Symbol=EHD4 EH domain-containing protein 4	Q9H223		3	2	3	1
ab16moc_1250	YES	YES	Ehd3	MGI:1928900	EHD3	HGNC:3244	ENSMUSG00000024065	ENSG00000013016	57440	30845	Cluster 652	Ehd3	EHD3	IPI00135677	IPI:IPI00135677.1|SWISS-PROT:Q9QXY6|TREMBL:Q8K590;Q8R0V6|ENSEMBL:ENSMUSP00000024860|REFSEQ:NP_065603 Tax_Id=10090 Gene_Symbol=Ehd3 EH domain-containing protein 3	Q9QXY6	IPI00021458	IPI:IPI00021458.1|SWISS-PROT:Q9NZN3|ENSEMBL:ENSP00000327116;ENSP00000368772|REFSEQ:NP_055415|H-INV:HIT000072813|VEGA:OTTHUMP00000125203 Tax_Id=9606 Gene_Symbol=EHD3 EH domain-containing protein 3	Q9NZN3		2	1	1	1		YES
ab16moc_782	YES	YES	Eef1d	MGI:1913906	EEF1D	HGNC:3211	ENSMUSG00000055762	ENSG00000104529	66656	1936	Cluster 326	Eef1d	EEF1D	IPI00118875	IPI:IPI00118875.4|SWISS-PROT:P57776-1|TREMBL:Q68FG5|ENSEMBL:ENSMUSP00000087110|REFSEQ:NP_083939|VEGA:OTTMUSP00000021367 Tax_Id=10090 Gene_Symbol=Eef1d eukaryotic translation elongation factor 1 delta isoform a	P57776	IPI00023048	IPI:IPI00023048.4|SWISS-PROT:P29692|ENSEMBL:ENSP00000349245|REFSEQ:NP_001951|VEGA:OTTHUMP00000178393;OTTHUMP00000178406 Tax_Id=9606 Gene_Symbol=EEF1D Elongation factor 1-delta	P29692		5	5	2	3	YES	YES
ab16moc_582	YES	YES	Eef1g	MGI:1914410	EEF1G	HGNC:3213	ENSMUSG00000071644	ENSG00000186676	67160	1937	Cluster 778	Eef1g	EEF1G	IPI00318841	IPI:IPI00318841.4|SWISS-PROT:Q9D8N0|TREMBL:Q4FZK2;Q8R1N8|ENSEMBL:ENSMUSP00000093955|REFSEQ:NP_080283|VEGA:OTTMUSP00000022242 Tax_Id=10090 Gene_Symbol=Eef1g Elongation factor 1-gamma	Q9D8N0	IPI00000875	IPI:IPI00000875.6|SWISS-PROT:P26641|TREMBL:Q2F838;Q2F840;Q53YD7|ENSEMBL:ENSP00000331901|REFSEQ:NP_001395|H-INV:HIT000049297 Tax_Id=9606 Gene_Symbol=EEF1G Elongation factor 1-gamma	P26641		8	5	7	7	YES	YES
ab16moc_394	YES	YES	Eef1a2	MGI:1096317	EEF1A2	HGNC:3192	ENSMUSG00000016349	ENSG00000101210	13628	1917	Cluster 314	Eef1a2	EEF1A2	IPI00119667	IPI:IPI00119667.1|SWISS-PROT:P62631|ENSEMBL:ENSMUSP00000054556|REFSEQ:NP_031932|VEGA:OTTMUSP00000017863 Tax_Id=10090 Gene_Symbol=Eef1a2 Elongation factor 1-alpha 2	P62631	IPI00014424	IPI:IPI00014424.1|SWISS-PROT:Q05639|ENSEMBL:ENSP00000217182;ENSP00000298049|REFSEQ:NP_001949|H-INV:HIT000279336|VEGA:OTTHUMP00000031555;OTTHUMP00000031776 Tax_Id=9606 Gene_Symbol=EEF1A2 Elongation factor 1-alpha 2	Q05639		12	9	7	10	YES
ab16moc_342	YES	YES	Eef1a1	MGI:1096881	EEF1A1	HGNC:3189	ENSMUSG00000037742	ENSG00000156508	13627	1915	Cluster 314	Eef1a1	EEF1A1	IPI00307837	IPI:IPI00307837.5|SWISS-PROT:P10126|TREMBL:Q3TII3;Q3UA81;Q3UZQ3;Q4FZE5;Q58E64|ENSEMBL:ENSMUSP00000042457|REFSEQ:NP_034236|VEGA:OTTMUSP00000021291 Tax_Id=10090 Gene_Symbol=Eef1a1 Elongation factor 1-alpha 1	P10126	IPI00396485	IPI:IPI00396485.3|SWISS-PROT:P68104|TREMBL:Q16577;Q53G85;Q53G89;Q53GA1;Q53GE9;Q53HM9;Q53HQ7;Q53HR1;Q53HR5;Q6IPN6;Q6IPS9;Q6IPT9;Q8IUB0;Q96RE1;Q9H2I7;Q9NZS6|ENSEMBL:ENSP00000330054;ENSP00000339053;ENSP00000339063|REFSEQ:NP_001393|H-INV:HIT000279745|VEGA:OTT	P68104		14	12	8	11	YES	YES
ab16moc_618	YES	YES	Tufm	MGI:1923686	TUFM	HGNC:12420	ENSMUSG00000073838	ENSG00000178952	233870	7284	Cluster 408	Tufm	TUFM	IPI00274407	IPI:IPI00274407.1|SWISS-PROT:Q8BFR5-1|ENSEMBL:ENSMUSP00000095656|REFSEQ:NP_766333 Tax_Id=10090 Gene_Symbol=Tufm Isoform 1 of Elongation factor Tu, mitochondrial precursor	Q8BFR5	IPI00027107	IPI:IPI00027107.5|SWISS-PROT:P49411|ENSEMBL:ENSP00000322439|REFSEQ:NP_003312|H-INV:HIT000034759|VEGA:OTTHUMP00000081636;OTTHUMP00000108769;OTTHUMP00000122539 Tax_Id=9606 Gene_Symbol=TUFM Tu translation elongation factor, mitochondrial	P49411		7	7	7	7	YES	YES
ab16moc_764	YES	YES	Sh3gl2	MGI:700009	SH3GL2	HGNC:10831	ENSMUSG00000028488	ENSG00000107295	20404	6456	Cluster 162	Sh3gl2	SH3GL2	IPI00648567	IPI:IPI00648567.1|TREMBL:A2ALV3|VEGA:OTTMUSP00000008292 Tax_Id=10090 Gene_Symbol=Sh3gl2 SH3-domain GRB2-like 2	A2ALV3	IPI00019171	IPI:IPI00019171.1|SWISS-PROT:Q99962|TREMBL:Q3V639;Q7Z376;Q8IZ09|ENSEMBL:ENSP00000369981|REFSEQ:NP_003017|H-INV:HIT000063326|VEGA:OTTHUMP00000021084;OTTHUMP00000044927 Tax_Id=9606 Gene_Symbol=SH3GL2 SH3-containing GRB2-like protein 2	Q99962		5		3	2		YES
ab16moc_908	YES	YES	Sh3gl1	MGI:700010	SH3GL1	HGNC:10830	ENSMUSG00000003200	ENSG00000141985	20405	6455	Cluster 694	Sh3gl1	SH3GL1	IPI00312752	IPI:IPI00312752.3|SWISS-PROT:Q62419|TREMBL:Q3TJB4;Q3TRJ7;Q3U3C4|ENSEMBL:ENSMUSP00000003268|REFSEQ:NP_038692 Tax_Id=10090 Gene_Symbol=Sh3gl1 SH3-containing GRB2-like protein 1	Q62419	IPI00019169	IPI:IPI00019169.3|SWISS-PROT:Q99961|TREMBL:Q6FGM0;Q9UQD4|ENSEMBL:ENSP00000269886|REFSEQ:NP_003016|H-INV:HIT000030276|VEGA:OTTHUMP00000066822;OTTHUMP00000078039 Tax_Id=9606 Gene_Symbol=SH3GL1 SH3-containing GRB2-like protein 1	Q99961		4	3		2		YES
ab16moc_211	YES	YES	Elmo2	MGI:2153045	ELMO2	HGNC:17233	ENSMUSG00000017670	ENSG00000062598	140579	63916	Cluster 375	Elmo2	ELMO2	IPI00756692	IPI:IPI00756692.1|SWISS-PROT:Q8BHL5-2|TREMBL:Q5GMG3|ENSEMBL:ENSMUSP00000091887;ENSMUSP00000099378;ENSMUSP00000099380|REFSEQ:NP_525026|VEGA:OTTMUSP00000001119;OTTMUSP00000001122 Tax_Id=10090 Gene_Symbol=Elmo2 Isoform 2 of Engulfment and cell motility prote	Q8BHL5	IPI00260090	IPI:IPI00260090.2|SWISS-PROT:Q96JJ3-1|ENSEMBL:ENSP00000290246|REFSEQ:NP_573403;NP_877496|H-INV:HIT000001549|VEGA:OTTHUMP00000031204;OTTHUMP00000031762 Tax_Id=9606 Gene_Symbol=ELMO2 Isoform 1 of Engulfment and cell motility protein 2	Q96JJ3		21	18	11	12	YES	YES
ab16moc_187	YES	YES	Eps15l1	MGI:104582	EPS15L1	HGNC:24634	ENSMUSG00000006276	ENSG00000127527	13859	58513	Cluster 523	Eps15l1	EPS15L1	IPI00420185	IPI:IPI00420185.1|SWISS-PROT:Q60902-1|TREMBL:Q3UIS9|ENSEMBL:ENSMUSP00000006439|REFSEQ:NP_031970 Tax_Id=10090 Gene_Symbol=Eps15l1 Isoform 1 of Epidermal growth factor receptor substrate 15-like 1	Q60902	IPI00163849	IPI:IPI00163849.1|SWISS-PROT:Q9UBC2|ENSEMBL:ENSP00000248070|REFSEQ:NP_067058|H-INV:HIT000058425|VEGA:OTTHUMP00000076461 Tax_Id=9606 Gene_Symbol=EPS15L1 Epidermal growth factor receptor substrate 15-like 1	Q9UBC2		23	13	11	14	YES	YES
ab16moc_1056	YES	YES	Eef2	MGI:95288	EEF2	HGNC:3214	ENSMUSG00000034994	ENSG00000167658	13629	1938	Cluster 1928	Eef2	EEF2	IPI00466069	IPI:IPI00466069.3|SWISS-PROT:P58252|TREMBL:O89069;O89070;Q3TJZ1;Q3TK17;Q3TLB1;Q3TPG2;Q3TSK4;Q3TW58;Q3TWX1;Q3TX47;Q3UBL9;Q3UDC8;Q3UMI7;Q3UZ14;Q61509;Q6P9L9;Q8BMA8;Q8C153;Q99LT6|ENSEMBL:ENSMUSP00000046101|REFSEQ:NP_031933 Tax_Id=10090 Gene_Symbol=Eef2 Elong	P58252	IPI00186290	IPI:IPI00186290.6|SWISS-PROT:P13639|TREMBL:Q6PK56;Q8TA90|ENSEMBL:ENSP00000307940|REFSEQ:NP_001952|H-INV:HIT000326370|VEGA:OTTHUMP00000076424;OTTHUMP00000083014 Tax_Id=9606 Gene_Symbol=EEF2 Elongation factor 2	P13639		3		3	2
ab16moc_1107	YES	YES	Eif4g1	MGI:2384784	EIF4G1	HGNC:3296	ENSMUSG00000045983	ENSG00000114867	208643	1981	Cluster 2779	Eif4g1	EIF4G1	IPI00421179	IPI:IPI00421179.1|SWISS-PROT:Q6NZJ6-1|TREMBL:Q3UTK0;Q3UYM6|ENSEMBL:ENSMUSP00000047678|REFSEQ:NP_666053 Tax_Id=10090 Gene_Symbol=Eif4g1 Isoform 1 of Eukaryotic translation initiation factor 4 gamma 1	Q6NZJ6	IPI00552639	IPI:IPI00552639.2|SWISS-PROT:Q04637-1|ENSEMBL:ENSP00000316879|REFSEQ:NP_886553;NP_937884|H-INV:HIT000076104|VEGA:OTTHUMP00000173812 Tax_Id=9606 Gene_Symbol=EIF4G1 Isoform 1 of Eukaryotic translation initiation factor 4 gamma 1	Q04637		3	1		2
ab16moc_443	YES	YES	Exoc1	MGI:2445020	EXOC1	HGNC:30380	ENSMUSG00000036435	ENSG00000090989	69940	55763	Cluster 1210	Exoc1	EXOC1	IPI00153813	IPI:IPI00153813.4|TREMBL:Q6P1Y9|REFSEQ:NP_081546;XP_001052151;XP_001052152 Tax_Id=10090 Gene_Symbol=Exoc1 Exocyst complex component 1	Q6P1Y9	IPI00019427	IPI:IPI00019427.4|SWISS-PROT:Q9NV70-1|ENSEMBL:ENSP00000326514;ENSP00000370695|REFSEQ:NP_001020095;NP_060731|H-INV:HIT000004229|VEGA:OTTHUMP00000128358 Tax_Id=9606 Gene_Symbol=EXOC1 Isoform 1 of Exocyst complex component 1	Q9NV70		11	6	6	8	YES	YES
ab16moc_466	YES	YES	Exoc3	MGI:2443972	EXOC3	HGNC:30378	ENSMUSG00000034152	ENSG00000180104	211446	11336	Cluster 911	Exoc3	EXOC3	IPI00454030	IPI:IPI00454030.3|SWISS-PROT:Q6KAR6|TREMBL:Q8BIT7;Q8K0E2;Q9ET46|ENSEMBL:ENSMUSP00000039416|REFSEQ:NP_796307 Tax_Id=10090 Gene_Symbol=Exoc3 Exocyst complex component 3	Q6KAR6	IPI00157734	IPI:IPI00157734.2|SWISS-PROT:O60645-1|TREMBL:Q69YP2;Q6P2E8;Q6ZNJ2|ENSEMBL:ENSP00000323377|REFSEQ:NP_009208|H-INV:HIT000261488 Tax_Id=9606 Gene_Symbol=EXOC3 Isoform 1 of Exocyst complex component 3	O60645		10	6	7	6	YES	YES
ab16moc_375	YES	YES	Exoc7	MGI:1859270	EXOC7	HGNC:23214	ENSMUSG00000020792	ENSG00000182473	53413	23265	Cluster 584	Exoc7	EXOC7	IPI00316650	IPI:IPI00316650.1|SWISS-PROT:O35250-1|TREMBL:Q3USE0;Q69ZS4|ENSEMBL:ENSMUSP00000021147|REFSEQ:NP_058553|VEGA:OTTMUSP00000004091 Tax_Id=10090 Gene_Symbol=Exoc7 Isoform 1 of Exocyst complex component 7	O35250	IPI00172532	IPI:IPI00172532.1|SWISS-PROT:Q9UPT5-1|TREMBL:Q5G0E1|ENSEMBL:ENSP00000349767|REFSEQ:NP_001013861|H-INV:HIT000000784|VEGA:OTTHUMP00000041937;OTTHUMP00000182492 Tax_Id=9606 Gene_Symbol=EXOC7 Isoform 1 of Exocyst complex component 7	Q9UPT5		13	11	5	5	YES
ab16moc_770	YES	YES	Capza1	MGI:106227	CAPZA1	HGNC:1488	ENSMUSG00000070372	ENSG00000116489	12340	829	Cluster 487	Capza1	CAPZA1	IPI00330063	IPI:IPI00330063.6|SWISS-PROT:P47753|TREMBL:Q3TLJ0;Q3UAS2;Q5RKN9|ENSEMBL:ENSMUSP00000091568|REFSEQ:NP_033927|VEGA:OTTMUSP00000025120 Tax_Id=10090 Gene_Symbol=Capza1 F-actin capping protein subunit alpha-1	P47753	IPI00005969	IPI:IPI00005969.3|SWISS-PROT:P52907|ENSEMBL:ENSP00000263168|REFSEQ:NP_006126|H-INV:HIT000057385|VEGA:OTTHUMP00000013512;OTTHUMP00000059269 Tax_Id=9606 Gene_Symbol=CAPZA1 F-actin capping protein subunit alpha-1	P52907		5	4	5	5	YES	YES
ab16moc_371	YES	YES	Capza2	MGI:106222	CAPZA2	HGNC:1490	ENSMUSG00000015733	ENSG00000198898	12343	830	Cluster 217	Capza2	CAPZA2	IPI00111265	IPI:IPI00111265.3|SWISS-PROT:P47754|TREMBL:Q3U7G3;Q3UBZ3;Q3UCD2;Q5DQJ3|ENSEMBL:ENSMUSP00000015877|REFSEQ:NP_031630|VEGA:OTTMUSP00000017623 Tax_Id=10090 Gene_Symbol=Capza2 F-actin capping protein subunit alpha-2	P47754	IPI00026182	IPI:IPI00026182.5|SWISS-PROT:P47755|TREMBL:A4D0V4;Q53GC7;Q53GE2|ENSEMBL:ENSP00000354947|REFSEQ:NP_006127|H-INV:HIT000217522|VEGA:OTTHUMP00000024803;OTTHUMP00000108263 Tax_Id=9606 Gene_Symbol=CAPZA2 F-actin capping protein subunit alpha-2	P47755		13	11	11	11	YES	YES
ab16moc_203	YES	YES	Capzb	MGI:104652	CAPZB	HGNC:1491	ENSMUSG00000028745	ENSG00000077549	12345	832	Cluster 41	Capzb	CAPZB	IPI00269481	IPI:IPI00269481.7|SWISS-PROT:P47757-2|TREMBL:Q3TRH8;Q923G3|ENSEMBL:ENSMUSP00000030518;ENSMUSP00000099566|REFSEQ:NP_033928|VEGA:OTTMUSP00000010479 Tax_Id=10090 Gene_Symbol=Capzb Isoform 2 of F-actin capping protein subunit beta	P47757	IPI00026185	IPI:IPI00026185.5|SWISS-PROT:P47756-1|ENSEMBL:ENSP00000264202;ENSP00000364284|VEGA:OTTHUMP00000002654;OTTHUMP00000065152 Tax_Id=9606 Gene_Symbol=CAPZB Isoform 1 of F-actin capping protein subunit beta	P47756		22	17	14	12	YES	YES
ab16moc_80	YES	YES	Fbxo41	MGI:1261912	FBXO41	HGNC:29409	ENSMUSG00000047013	ENSG00000163013	330369	150726	Cluster 209	Fbxo41	FBXO41	IPI00415914	IPI:IPI00415914.3|SWISS-PROT:Q6NS60|TREMBL:Q3UGY7|ENSEMBL:ENSMUSP00000058653|REFSEQ:NP_001001160 Tax_Id=10090 Gene_Symbol=Fbxo41 F-box only protein 41	Q6NS60	IPI00291868	IPI:IPI00291868.7|SWISS-PROT:Q8TF61|TREMBL:Q2M1V8|ENSEMBL:ENSP00000295133|REFSEQ:NP_001073879;XP_001133261|H-INV:HIT000001655 Tax_Id=9606 Gene_Symbol=FBXO41 F-box protein 41	Q8TF61		39	28	33	24	YES	YES
ab16moc_509	YES	YES	Farp1	MGI:2446173	FARP1	HGNC:3591	ENSMUSG00000025555	ENSG00000152767	223254	10160	Cluster 1431	Farp1	FARP1	IPI00356904	IPI:IPI00356904.7|TREMBL:Q80VF7;Q8BM51;Q8K2R0;Q8R2X2;Q99KU3|ENSEMBL:ENSMUSP00000026635|REFSEQ:NP_598843 Tax_Id=10090 Gene_Symbol=Farp1 FERMRhoGEF (Arhgef) and pleckstrin domain protein 1	Q80VF7	IPI00024773	IPI:IPI00024773.1|SWISS-PROT:Q9Y4F1-1|ENSEMBL:ENSP00000322926|REFSEQ:NP_005757|H-INV:HIT000096781|VEGA:OTTHUMP00000018588;OTTHUMP00000040734 Tax_Id=9606 Gene_Symbol=FARP1 Isoform 1 of FERM, RhoGEF and pleckstrin domain-containing protein 1	Q9Y4F1		9	5	4	7	YES	YES
ab16moc_1262	YES	YES	Fscn1	MGI:1352745	FSCN1	HGNC:11148	ENSMUSG00000029581	ENSG00000075618	14086	6624	Cluster 1050	Fscn1	FSCN1	IPI00353563	IPI:IPI00353563.4|SWISS-PROT:Q61553|ENSEMBL:ENSMUSP00000031565|REFSEQ:NP_032010 Tax_Id=10090 Gene_Symbol=Fscn1 Fascin	Q61553	IPI00163187	IPI:IPI00163187.10|SWISS-PROT:Q16658|ENSEMBL:ENSP00000339729|REFSEQ:NP_003079|H-INV:HIT000033550|VEGA:OTTHUMP00000115718 Tax_Id=9606 Gene_Symbol=FSCN1 Fascin	Q16658		2		2			YES
ab16moc_1108	YES	YES	Fkbp8	MGI:1341070	FKBP8	HGNC:3724	ENSMUSG00000019428	ENSG00000105701	14232	23770	Cluster 1668	Fkbp8	FKBP8	IPI00130833	IPI:IPI00130833.2|SWISS-PROT:O35465|TREMBL:Q3UK86;Q6GTX9;Q811M7;Q811R4;Q8C2F0|ENSEMBL:ENSMUSP00000074935|REFSEQ:NP_034353 Tax_Id=10090 Gene_Symbol=Fkbp8 FK506-binding protein 38	O35465	IPI00640341	IPI:IPI00640341.1|SWISS-PROT:Q14318|TREMBL:Q86YK6|VEGA:OTTHUMP00000076510 Tax_Id=9606 Gene_Symbol=FKBP8 FK506-binding protein 38	Q14318		3	3	3	1		YES
ab16moc_1347	YES	YES	Flii	MGI:1342286	FLII	HGNC:3750	ENSMUSG00000002812	ENSG00000177731	14248	2314	Cluster 2925	Flii	FLII	IPI00467104	IPI:IPI00467104.2|SWISS-PROT:Q9JJ28|TREMBL:Q3TUY1|ENSEMBL:ENSMUSP00000002889|REFSEQ:NP_071292|VEGA:OTTMUSP00000008167 Tax_Id=10090 Gene_Symbol=Flii Protein flightless-1 homolog	Q9JJ28	IPI00031023	IPI:IPI00031023.1|SWISS-PROT:Q13045|ENSEMBL:ENSP00000324573|REFSEQ:NP_002009|H-INV:HIT000039889|VEGA:OTTHUMP00000065689;OTTHUMP00000183282 Tax_Id=9606 Gene_Symbol=FLII Protein flightless-1 homolog	Q13045		2	1	1
ab16moc_165	YES	YES	Flot1	MGI:1100500	FLOT1	HGNC:3757	ENSMUSG00000059714	ENSG00000137312	14251	10211	Cluster 112	Flot1	FLOT1	IPI00117181	IPI:IPI00117181.1|SWISS-PROT:O08917|TREMBL:Q3TJS0;Q540I4;Q6Y9S2|ENSEMBL:ENSMUSP00000001569|REFSEQ:NP_032053 Tax_Id=10090 Gene_Symbol=Flot1 Flotillin-1	O08917	IPI00027438	IPI:IPI00027438.2|SWISS-PROT:O75955|TREMBL:A2VCL5;Q53HQ0;Q5ST80;Q6IB58|ENSEMBL:ENSP00000365569;ENSP00000372873;ENSP00000373056|REFSEQ:NP_005794|H-INV:HIT000068165|VEGA:OTTHUMP00000014916;OTTHUMP00000029030;OTTHUMP00000029208;OTTHUMP00000029620 Tax_Id=9606	O75955		25	17	13	19	YES	YES
ab16moc_176	YES	YES	Flot2	MGI:103309	FLOT2	HGNC:3758	ENSMUSG00000061981	ENSG00000132589	14252	2319	Cluster 101	Flot2	FLOT2	IPI00119060	IPI:IPI00119060.5|TREMBL:Q5SS82;Q8CDE0;Q9DC36|ENSEMBL:ENSMUSP00000072136|REFSEQ:NP_001035493|VEGA:OTTMUSP00000000102 Tax_Id=10090 Gene_Symbol=Flot2 flotillin 2 isoform 1	Q5SS82	IPI00789008	IPI:IPI00789008.1|TREMBL:Q9BTI6|REFSEQ:NP_004466|VEGA:OTTHUMP00000041866;OTTHUMP00000163514 Tax_Id=9606 Gene_Symbol=FLOT2 flotillin 2	Q9BTI6		24	19	15	17	YES	YES
ab16moc_239	YES	YES	Fmn2	MGI:1859252	FMN2	HGNC:14074	ENSMUSG00000028354	ENSG00000155816	54418	56776	Cluster 940	Fmn2	FMN2	IPI00123295	IPI:IPI00123295.1|SWISS-PROT:Q9JL04|TREMBL:Q3USM5|ENSEMBL:ENSMUSP00000030039|REFSEQ:NP_062318 Tax_Id=10090 Gene_Symbol=Fmn2 Formin-2	Q9JL04	IPI00742944	IPI:IPI00742944.2|SWISS-PROT:Q9NZ56|ENSEMBL:ENSP00000318884;ENSP00000355525|REFSEQ:NP_064450|VEGA:OTTHUMP00000037814 Tax_Id=9606 Gene_Symbol=FMN2 Formin-2	Q9NZ56		19	12	14	14	YES	YES
ab16moc_1065	YES	YES	Fmnl1	MGI:1888994	FMNL1	HGNC:1212	ENSMUSG00000055805	ENSG00000184922	57778	752	Cluster 1710	Fmnl1	FMNL1	IPI00123377	IPI:IPI00123377.1|SWISS-PROT:Q9JL26-1|TREMBL:A2AB61|ENSEMBL:ENSMUSP00000046296|REFSEQ:NP_001071166|VEGA:OTTMUSP00000002931 Tax_Id=10090 Gene_Symbol=Fmnl1 Isoform 1 of Formin-like protein 1	Q9JL26	IPI00025202	IPI:IPI00025202.4|SWISS-PROT:O95466-2|ENSEMBL:ENSP00000327442|VEGA:OTTHUMP00000041906 Tax_Id=9606 Gene_Symbol=FMNL1 Isoform 2 of Formin-like protein 1	O95466		3			3
ab16moc_301	YES	YES	Fmnl2	MGI:1918659	FMNL2	HGNC:18267	ENSMUSG00000036053	ENSG00000157827	71409	114793	Cluster 569	Fmnl2	FMNL2	IPI00345373	IPI:IPI00345373.4|TREMBL:A2APV2;Q7TPA8|ENSEMBL:ENSMUSP00000057084|REFSEQ:NP_765997|VEGA:OTTMUSP00000013301 Tax_Id=10090 Gene_Symbol=Fmnl2 Formin-like 2	A2APV2	IPI00044748	IPI:IPI00044748.5|TREMBL:Q14CC9;Q6ZN96;Q8N3E0;Q96PY5|ENSEMBL:ENSP00000334991|REFSEQ:NP_443137|H-INV:HIT000001617 Tax_Id=9606 Gene_Symbol=FMNL2 formin-like 2	Q14CC9		15	10	7	11	YES	YES
ab16moc_805	YES	YES	Fmnl3	MGI:109569	FMNL3	HGNC:23698	ENSMUSG00000023008	ENSG00000161791	22379	91010	Cluster 1826	Fmnl3	FMNL3	IPI00652582	IPI:IPI00652582.1|TREMBL:Q3TCF9|ENSEMBL:ENSMUSP00000079984 Tax_Id=10090 Gene_Symbol=Fmnl3 NOD-derived CD11c +ve dendritic cells cDNA, RIKEN full-length enriched library, clone:F630118E23 product:formin-like 3, full insert sequence	Q3TCF9	IPI00418767	IPI:IPI00418767.2|TREMBL:Q6ZRJ1|ENSEMBL:ENSP00000344311|REFSEQ:NP_944489|H-INV:HIT000048068 Tax_Id=9606 Gene_Symbol=FMNL3 formin-like 3 isoform 2	Q6ZRJ1		5	3	3	4	YES	YES
ab16moc_458	YES	YES	Fxr2	MGI:1346074	FXR2	HGNC:4024	ENSMUSG00000018765	ENSG00000129245	23879	9513	Cluster 924	Fxr2	FXR2	IPI00126389	IPI:IPI00126389.2|TREMBL:Q6P5B5|ENSEMBL:ENSMUSP00000018909|REFSEQ:NP_035944|VEGA:OTTMUSP00000006226 Tax_Id=10090 Gene_Symbol=Fxr2 Fragile X mental retardation, autosomal homolog 2	Q6P5B5	IPI00016250	IPI:IPI00016250.6|SWISS-PROT:P51116|TREMBL:Q86V09|ENSEMBL:ENSP00000250113|REFSEQ:NP_004851|H-INV:HIT000219143|VEGA:OTTHUMP00000183139 Tax_Id=9606 Gene_Symbol=FXR2 Fragile X mental retardation syndrome-related protein 2	P51116		11	6		8
ab16moc_480	YES	YES	Gabbr1	MGI:1860139	GABBR1	HGNC:4070	ENSMUSG00000024462	ENSG00000204681	54393	2550	Cluster 1127	Gabbr1	GABBR1	IPI00223325	IPI:IPI00223325.5|SWISS-PROT:Q9WV18-1|TREMBL:Q6PGJ2;Q8CAF8|ENSEMBL:ENSMUSP00000025338|REFSEQ:NP_062312 Tax_Id=10090 Gene_Symbol=Gabbr1 Isoform 1A of Gamma-aminobutyric acid type B receptor, subunit 1 precursor	Q9WV18	IPI00218741	IPI:IPI00218741.1|SWISS-PROT:Q9UBS5-5|TREMBL:Q71SG6|ENSEMBL:ENSP00000366177;ENSP00000373029;ENSP00000373132|REFSEQ:NP_068705 Tax_Id=9606 Gene_Symbol=GABBR1 Isoform 1E of Gamma-aminobutyric acid type B receptor, subunit 1 precursor	Q9UBS5		10	8	9	3	YES
ab16moc_227	YES	YES	Gabbr2	MGI:2386030	GABBR2	HGNC:4507	ENSMUSG00000039809	ENSG00000136928	242425	9568	Cluster 617	Gabbr2	GABBR2	IPI00409336	IPI:IPI00409336.4|TREMBL:A2AL05|REFSEQ:NP_001074610|VEGA:OTTMUSP00000007177 Tax_Id=10090 Gene_Symbol=Gabbr2 Ortholog of human G protein-coupled receptor 51 GPR51	A2AL05	IPI00027250	IPI:IPI00027250.1|SWISS-PROT:O75899|ENSEMBL:ENSP00000259455|REFSEQ:NP_005449|H-INV:HIT000064681|VEGA:OTTHUMP00000021776;OTTHUMP00000063797 Tax_Id=9606 Gene_Symbol=GABBR2 Gamma-aminobutyric acid type B receptor, subunit 2 precursor	O75899		20	14	13	15	YES	YES
ab16moc_561	YES	YES	Add3	MGI:1351615	ADD3	HGNC:245	ENSMUSG00000025026	ENSG00000148700	27360	120	Cluster 1105	Add3	ADD3	IPI00387580	IPI:IPI00387580.1|SWISS-PROT:Q9QYB5-2|TREMBL:Q05C56;Q8BJH2;Q8JZT6|ENSEMBL:ENSMUSP00000025999|REFSEQ:NP_038786 Tax_Id=10090 Gene_Symbol=Add3 Adducin 3	Q9QYB5	IPI00220754	IPI:IPI00220754.1|SWISS-PROT:Q9UEY8-2|TREMBL:Q5VU09|ENSEMBL:ENSP00000277900;ENSP00000353286|REFSEQ:NP_001112;NP_063968|VEGA:OTTHUMP00000020459;OTTHUMP00000020461;OTTHUMP00000020463;OTTHUMP00000020464 Tax_Id=9606 Gene_Symbol=ADD3 Isoform 1 of Gamma-adducin	Q9UEY8		8	6	4	5	YES	YES
ab16moc_1064	YES	YES	Gabarapl2	MGI:1890602	GABARAPL2	HGNC:13291	ENSMUSG00000031950	ENSG00000034713	93739	11345	Cluster 473	Gabarapl2	GABARAPL2	IPI00309200	IPI:IPI00309200.1|SWISS-PROT:P60521|ENSEMBL:ENSMUSP00000034428|REFSEQ:NP_080969 Tax_Id=10090 Gene_Symbol=Gabarapl2 Gamma-aminobutyric acid receptor-associated protein-like 2	P60521	IPI00026358	IPI:IPI00026358.3|SWISS-PROT:P60520|TREMBL:Q6FG91|ENSEMBL:ENSP00000037243|REFSEQ:NP_009216|H-INV:HIT000059006|VEGA:OTTHUMP00000080663;OTTHUMP00000107662;OTTHUMP00000174953 Tax_Id=9606 Gene_Symbol=GABARAPL2 Gamma-aminobutyric acid receptor-associated prote	P60520		3	1	1	3
ab16moc_1127	YES	YES	Gabra4	MGI:95616	GABRA4	HGNC:4078	ENSMUSG00000029211	ENSG00000109158	14397	2557	Cluster 1999	Gabra4	GABRA4	IPI00109065	IPI:IPI00109065.1|SWISS-PROT:Q9D6F4|TREMBL:O88963;Q3TRC7;Q3URE7;Q3USX9;Q543Z0|ENSEMBL:ENSMUSP00000031121|REFSEQ:NP_034381 Tax_Id=10090 Gene_Symbol=Gabra4 Gamma-aminobutyric-acid receptor subunit alpha-4 precursor	Q9D6F4	IPI00008225	IPI:IPI00008225.1|SWISS-PROT:P48169 Tax_Id=9606 Gene_Symbol=GABRA4 Gamma-aminobutyric-acid receptor subunit alpha-4 precursor	P48169		3	3	3	2	YES
ab16moc_447	YES	YES	Gabra1	MGI:95613	GABRA1	HGNC:4075	ENSMUSG00000010803	ENSG00000022355	14394	2554	Cluster 727	Gabra1	GABRA1	IPI00113772	IPI:IPI00113772.1|SWISS-PROT:P62812|TREMBL:Q3URD4;Q5SUY9|ENSEMBL:ENSMUSP00000020707|REFSEQ:NP_034380|VEGA:OTTMUSP00000005606 Tax_Id=10090 Gene_Symbol=Gabra1 Gamma-aminobutyric-acid receptor subunit alpha-1 precursor	P62812	IPI00295235	IPI:IPI00295235.5|SWISS-PROT:P14867|TREMBL:Q53F42|ENSEMBL:ENSP00000023897|REFSEQ:NP_000797|H-INV:HIT000041105|VEGA:OTTHUMP00000065263;OTTHUMP00000160870 Tax_Id=9606 Gene_Symbol=GABRA1 Gamma-aminobutyric-acid receptor subunit alpha-1 precursor	P14867		11	9	6	8	YES	YES
ab16moc_553	YES	YES	Napg	MGI:104561	NAPG	HGNC:7642	ENSMUSG00000024581	ENSG00000134265	108123	8774	Cluster 213	Napg	NAPG	IPI00109870	IPI:IPI00109870.1|SWISS-PROT:Q9CWZ7|TREMBL:Q8C1T5|ENSEMBL:ENSMUSP00000025474|REFSEQ:NP_082293 Tax_Id=10090 Gene_Symbol=Napg Gamma-soluble NSF attachment protein	Q9CWZ7	IPI00293817	IPI:IPI00293817.3|SWISS-PROT:Q99747|TREMBL:Q6FHY4|ENSEMBL:ENSP00000324628|REFSEQ:NP_003817|H-INV:HIT000221406|VEGA:OTTHUMP00000071876 Tax_Id=9606 Gene_Symbol=NAPG Gamma-soluble NSF attachment protein	Q99747		8	5	6	1		YES
ab16moc_557	YES	YES	Gdap1	MGI:1338002	GDAP1	HGNC:15968	ENSMUSG00000025777	ENSG00000104381	14545	54332	Cluster 270	Gdap1	GDAP1	IPI00134137	IPI:IPI00134137.1|SWISS-PROT:O88741-1|TREMBL:Q3UEX4;Q3UTV3|ENSEMBL:ENSMUSP00000026879|REFSEQ:NP_034397|VEGA:OTTMUSP00000025245 Tax_Id=10090 Gene_Symbol=Gdap1 Isoform 1 of Ganglioside-induced differentiation-associated protein 1	O88741	IPI00290544	IPI:IPI00290544.2|SWISS-PROT:Q8TB36|ENSEMBL:ENSP00000220822|REFSEQ:NP_061845|H-INV:HIT000326019|VEGA:OTTHUMP00000041392;OTTHUMP00000177613 Tax_Id=9606 Gene_Symbol=GDAP1 Ganglioside-induced differentiation-associated protein 1	Q8TB36		8	8	7	7	YES
ab16moc_940	YES	YES	Gdap1l1	MGI:2385163	GDAP1L1	HGNC:4213	ENSMUSG00000017943	ENSG00000124194	228858	78997	Cluster 1253	Gdap1l1	GDAP1L1	IPI00620728	IPI:IPI00620728.2|TREMBL:Q3USC7|VEGA:OTTMUSP00000001028 Tax_Id=10090 Gene_Symbol=Gdap1l1 10 days neonate cerebellum cDNA, RIKEN full-length enriched library, clone:B930010B03 product:ganglioside-induced differentiation- associated protein 1-like 1, full i	Q3USC7	IPI00552256	IPI:IPI00552256.3|TREMBL:Q5JY50|VEGA:OTTHUMP00000031053;OTTHUMP00000031058 Tax_Id=9606 Gene_Symbol=GDAP1L1 Ganglioside-induced differentiation-associated protein 1-like 1	Q5JY50		4	4	3	1
ab16moc_343	YES	YES	Gja1	MGI:95713	GJA1	HGNC:4274	ENSMUSG00000050953	ENSG00000176857	14609	2697	Cluster 251	Gja1	GJA1	IPI00380273	IPI:IPI00380273.1|SWISS-PROT:P23242|TREMBL:Q3UTR0;Q544I7;Q6T9D4;Q7TMQ1;Q8C4N2;Q8CE05;Q9CT20|ENSEMBL:ENSMUSP00000064536|REFSEQ:NP_034418 Tax_Id=10090 Gene_Symbol=Gja1 Gja1 protein	P23242	IPI00218487	IPI:IPI00218487.3|SWISS-PROT:P17302|TREMBL:Q53FJ6;Q6FHU1|ENSEMBL:ENSP00000282561|REFSEQ:NP_000156|H-INV:HIT000321810|VEGA:OTTHUMP00000017109;OTTHUMP00000017111 Tax_Id=9606 Gene_Symbol=GJA1 Gap junction alpha-1 protein	P17302		14	11	14	14	YES	YES
ab16moc_178	YES	YES	Gphn	MGI:109602	GPHN	HGNC:15465	ENSMUSG00000047454	ENSG00000171723	268566	10243	Cluster 379	Gphn	GPHN	IPI00816946	IPI:IPI00816946.1|TREMBL:A0JNY3 Tax_Id=10090 Gene_Symbol=- Gphn protein	A0JNY3	IPI00016006	IPI:IPI00016006.2|SWISS-PROT:Q9NQX3-1|TREMBL:Q96KU4|ENSEMBL:ENSP00000312771|REFSEQ:NP_001019389|H-INV:HIT000001100|VEGA:OTTHUMP00000070572 Tax_Id=9606 Gene_Symbol=GPHN Isoform 1 of Gephyrin	Q9NQX3		24	14	18	13	YES	YES
ab16moc_214	YES	YES	Gfap	MGI:95697	GFAP	HGNC:4235	ENSMUSG00000020932	ENSG00000131095	14580	2670	Cluster 13	Gfap	GFAP	IPI00649033	IPI:IPI00649033.5|SWISS-PROT:P03995-2|TREMBL:A0MTM0|ENSEMBL:ENSMUSP00000077061 Tax_Id=10090 Gene_Symbol=Gfap Isoform 2 of Glial fibrillary acidic protein, astrocyte	P03995	IPI00117042	IPI:IPI00117042.3|SWISS-PROT:P03995-1|ENSEMBL:ENSMUSP00000064691|REFSEQ:NP_034407|VEGA:OTTMUSP00000002989 Tax_Id=10090 Gene_Symbol=Gfap Isoform 1 of Glial fibrillary acidic protein, astrocyte	P03995		20	11	11	15	YES	YES
ab16moc_93	YES	YES	Glud1	MGI:95753	GLUD1	HGNC:4335	ENSMUSG00000021794	ENSG00000182890	14661	2746	Cluster 44	Glud1	GLUD1	IPI00114209	IPI:IPI00753095.1|REFSEQ:XP_992848 Tax_Id=10090 Gene_Symbol=Glud1 similar to Glutamate dehydrogenase 1, mitochondrial precursor (GDH) isoform 2	P26443	IPI00016801	IPI:IPI00016801.1|SWISS-PROT:P00367|TREMBL:Q14400;Q53GW3;Q9UQV0|ENSEMBL:ENSP00000277865|REFSEQ:NP_005262|H-INV:HIT000194758|VEGA:OTTHUMP00000020017;OTTHUMP00000020018 Tax_Id=9606 Gene_Symbol=GLUD1 Glutamate dehydrogenase 1, mitochondrial precursor	P00367		35	31	29	33	YES	YES
ab16moc_112	YES	YES	Gria3	MGI:95810	GRIA3	HGNC:4573	ENSMUSG00000001986	ENSG00000125675	53623	2892	Cluster 138	Gria3	GRIA3	IPI00131472	IPI:IPI00131472.4|SWISS-PROT:Q9Z2W9|TREMBL:A2AFV5;A2VDF4;A2VDF5;Q0VGS8;Q3TTV2;Q3TZK0;Q3UY17|ENSEMBL:ENSMUSP00000075687|REFSEQ:NP_058582|VEGA:OTTMUSP00000018928 Tax_Id=10090 Gene_Symbol=Gria3 Glutamate receptor 3 precursor	Q9Z2W9	IPI00219315	IPI:IPI00219315.2|SWISS-PROT:P42263-2|TREMBL:Q9P0H2|ENSEMBL:ENSP00000360302|REFSEQ:NP_015564|H-INV:HIT000217989|VEGA:OTTHUMP00000023969;OTTHUMP00000024261 Tax_Id=9606 Gene_Symbol=GRIA3 Isoform Flip of Glutamate receptor 3 precursor	P42263		33	24	25	22	YES	YES
ab16moc_140	YES	YES	Gria1	MGI:95808	GRIA1	HGNC:4571	ENSMUSG00000020524	ENSG00000155511	14799	2890	Cluster 138	Gria1	GRIA1	IPI00407939	IPI:IPI00407939.1|TREMBL:Q5NBY1;Q6P9M2;Q7TNB5;Q9CUV0|REFSEQ:NP_032191|VEGA:OTTMUSP00000005879 Tax_Id=10090 Gene_Symbol=Gria1 Glutamate receptor, ionotropic, AMPA1	Q5NBY1	IPI00030880	IPI:IPI00030880.2|SWISS-PROT:P42261-1|ENSEMBL:ENSP00000285900|REFSEQ:NP_000818|H-INV:HIT000196496|VEGA:OTTHUMP00000070506;OTTHUMP00000160643 Tax_Id=9606 Gene_Symbol=GRIA1 Isoform Flop of Glutamate receptor 1 precursor	P42261		29	16	20	21	YES	YES
ab16moc_282	YES	YES	Gria4	MGI:95811	GRIA4	HGNC:4574	ENSMUSG00000025892	ENSG00000152578	14802	2893	Cluster 138	Gria4	GRIA4	IPI00131471	IPI:IPI00131471.1|SWISS-PROT:Q9Z2W8|TREMBL:Q9QXM2|ENSEMBL:ENSMUSP00000027020 Tax_Id=10090 Gene_Symbol=Gria4 Glutamate receptor 4 precursor	Q9Z2W8	IPI00007632	IPI:IPI00007632.1|SWISS-PROT:P48058|ENSEMBL:ENSP00000282499|REFSEQ:NP_000820|H-INV:HIT000218333|VEGA:OTTHUMP00000063831 Tax_Id=9606 Gene_Symbol=GRIA4 Glutamate receptor 4 precursor	P48058		17	11	14	10	YES
ab16moc_52	YES	YES	Gria2	MGI:95809	GRIA2	HGNC:4572	ENSMUSG00000033981	ENSG00000120251	14800	2891	Cluster 138	Gria2	GRIA2	IPI00608015	IPI:IPI00608015.1|SWISS-PROT:P23819-4 Tax_Id=10090 Gene_Symbol=Gria2 Isoform 4 of Glutamate receptor 2 precursor	P23819	IPI00219216	IPI:IPI00219216.5|SWISS-PROT:P42262-2|TREMBL:Q59F93|ENSEMBL:ENSP00000296526|REFSEQ:NP_000817|H-INV:HIT000192431|VEGA:OTTHUMP00000070505;OTTHUMP00000165323 Tax_Id=9606 Gene_Symbol=GRIA2 Isoform Flip of Glutamate receptor 2 precursor	P42262		47	36	37	36	YES	YES
ab16moc_74	YES	YES	Grin2b	MGI:95821	GRIN2B	HGNC:4586	ENSMUSG00000030209	ENSG00000150086	14812	2904	Cluster 422	Grin2b	GRIN2B	IPI00321320	IPI:IPI00321320.3|SWISS-PROT:Q01097|TREMBL:Q8CG69|ENSEMBL:ENSMUSP00000062284|REFSEQ:NP_032197|VEGA:OTTMUSP00000017581 Tax_Id=10090 Gene_Symbol=Grin2b Glutamate [NMDA] receptor subunit epsilon-2 precursor	Q01097	IPI00297933	IPI:IPI00297933.1|SWISS-PROT:Q13224|TREMBL:Q59HA9|ENSEMBL:ENSP00000279593|REFSEQ:NP_000825|H-INV:HIT000222164|VEGA:OTTHUMP00000069581;OTTHUMP00000166784;OTTHUMP00000174410 Tax_Id=9606 Gene_Symbol=GRIN2B Glutamate [NMDA] receptor subunit epsilon-2 precurso	Q13224		41	37	31	33	YES	YES
ab16moc_100	YES	YES	Grin2a	MGI:95820	GRIN2A	HGNC:4585	ENSMUSG00000059003	ENSG00000183454	14811	2903	Cluster 458	Grin2a	GRIN2A	IPI00118380	IPI:IPI00118380.2|SWISS-PROT:P35436|ENSEMBL:ENSMUSP00000032331|REFSEQ:NP_032196|VEGA:OTTMUSP00000017426 Tax_Id=10090 Gene_Symbol=Grin2a Glutamate [NMDA] receptor subunit epsilon-1 precursor	P35436	IPI00029768	IPI:IPI00029768.1|SWISS-PROT:Q12879|TREMBL:Q547U9;Q59EW6|ENSEMBL:ENSP00000332549|REFSEQ:NP_000824|H-INV:HIT000222163|VEGA:OTTHUMP00000069579;OTTHUMP00000080708;OTTHUMP00000160135;OTTHUMP00000174531 Tax_Id=9606 Gene_Symbol=GRIN2A Glutamate [NMDA] receptor	Q12879		35	26	21	25	YES
ab16moc_129	YES	YES	Grin1	MGI:95819	GRIN1	HGNC:4584	ENSMUSG00000026959	ENSG00000176884	14810	2902	Cluster 322	Grin1	GRIN1	IPI00751834	IPI:IPI00751834.1|TREMBL:A2AI21|VEGA:OTTMUSP00000012763 Tax_Id=10090 Gene_Symbol=Grin1 Glutamate receptor ionotropic NMDA1	A2AI21	IPI00013915	IPI:IPI00013915.1|SWISS-PROT:Q05586-1|TREMBL:Q5VSF7|ENSEMBL:ENSP00000316696|REFSEQ:NP_015566|H-INV:HIT000100503|VEGA:OTTHUMP00000022673 Tax_Id=9606 Gene_Symbol=GRIN1 Isoform 3 of Glutamate [NMDA] receptor subunit zeta-1 precursor	Q05586		31	23	27	19	YES	YES
ab16moc_1061	YES	YES	Gls	MGI:95752	GLS	HGNC:4331	ENSMUSG00000026103	ENSG00000115419	14660	2744	Cluster 1672	Gls	GLS	IPI00671957	IPI:IPI00671957.2|TREMBL:Q69ZX9|ENSEMBL:ENSMUSP00000027273|REFSEQ:XP_905282|VEGA:OTTMUSP00000023769 Tax_Id=10090 Gene_Symbol=Gls glutaminase isoform 5	Q69ZX9	IPI00289159	IPI:IPI00289159.3|SWISS-PROT:O94925-1|TREMBL:Q53S89|ENSEMBL:ENSP00000317379|REFSEQ:NP_055720|H-INV:HIT000052044|VEGA:OTTHUMP00000163554 Tax_Id=9606 Gene_Symbol=GLS Isoform KGA of Glutaminase kidney isoform, mitochondrial precursor	O94925		3	3
ab16moc_347	YES	YES	Glul	MGI:95739	GLUL	HGNC:4341	ENSMUSG00000026473	ENSG00000135821	14645	2752	Cluster 284	Glul	GLUL	IPI00626790	IPI:IPI00626790.2|SWISS-PROT:P15105|ENSEMBL:ENSMUSP00000083375;ENSMUSP00000099574|REFSEQ:NP_032157|VEGA:OTTMUSP00000017702 Tax_Id=10090 Gene_Symbol=Glul Glutamine synthetase	P15105	IPI00010130	IPI:IPI00010130.3|SWISS-PROT:P15104|TREMBL:A1L199;Q2TU80;Q9NSP3|ENSEMBL:ENSP00000307900;ENSP00000344958;ENSP00000356537|REFSEQ:NP_001028216;NP_001028228;NP_002056|H-INV:HIT000038498|VEGA:OTTHUMP00000035524;OTTHUMP00000035525;OTTHUMP00000060703;OTTHUMP0000	P15104		14	5	12	7	YES	YES
ab16moc_1101	YES	YES	Qars	MGI:1915851	QARS	HGNC:9751	ENSMUSG00000032604	ENSG00000172053	97541	5859	Cluster 2164	Qars	QARS	IPI00223055	IPI:IPI00223055.2|TREMBL:Q3TIN2;Q3TN94;Q8BML9;Q8BU21;Q8R1V9|ENSEMBL:ENSMUSP00000006838|REFSEQ:NP_598555 Tax_Id=10090 Gene_Symbol=Qars CRL-1722 L5178Y-R cDNA, RIKEN full-length enriched library, clone:I730023H09 product:glutaminyl-tRNA synthetase, full ins	Q3TIN2	IPI00796091	IPI:IPI00796091.1|TREMBL:Q9BUZ3;Q9H3A5|VEGA:OTTHUMP00000171069 Tax_Id=9606 Gene_Symbol=QARS PRO2195	Q9BUZ3		3	2	1	3
ab16moc_174	YES	YES	Gapdh	MGI:95640	GAPDH	HGNC:4141	ENSMUSG00000057666	ENSG00000111640	14433	2597	Cluster 31	Gapdh	GAPDH	IPI00273646	IPI:IPI00273646.9|SWISS-PROT:P16858|TREMBL:Q3TUZ9|ENSEMBL:ENSMUSP00000073289|REFSEQ:NP_032110|VEGA:OTTMUSP00000005412 Tax_Id=10090 Gene_Symbol=Gapdh Glyceraldehyde-3-phosphate dehydrogenase	P16858	IPI00219018	IPI:IPI00219018.7|SWISS-PROT:P04406|TREMBL:Q2TSD0;Q53X65|ENSEMBL:ENSP00000229239|REFSEQ:NP_002037|H-INV:HIT000279789|VEGA:OTTHUMP00000082434;OTTHUMP00000082435;OTTHUMP00000082436;OTTHUMP00000166331;OTTHUMP00000174430;OTTHUMP00000174431;OTTHUMP00000174432	P04406		24	19	18	22	YES	YES
ab16moc_971	YES	YES	Gyk	MGI:106594	GK	HGNC:4289	ENSMUSG00000025059	ENSG00000198814	14933	2710	Cluster 1601	Gyk	GYK	IPI00135446	IPI:IPI00135446.1|SWISS-PROT:Q64516|TREMBL:A2AA43;Q9CVH5|REFSEQ:NP_032220|VEGA:OTTMUSP00000019464 Tax_Id=10090 Gene_Symbol=Gyk Glycerol kinase	Q64516	IPI00216067	IPI:IPI00216067.1|SWISS-PROT:P32189-3 Tax_Id=9606 Gene_Symbol=GK Isoform 3 of Glycerol kinase	P32189		4	3	2	3	YES
ab16moc_972	YES	YES	Gpc1	MGI:1194891	GPC1	HGNC:4449	ENSMUSG00000034220	ENSG00000063660	14733	2817	Cluster 1712	Gpc1	GPC1	IPI00137336	IPI:IPI00137336.1|SWISS-PROT:Q9QZF2|TREMBL:Q3U379;Q3U3U3;Q8CD04|ENSEMBL:ENSMUSP00000047199|REFSEQ:NP_057905 Tax_Id=10090 Gene_Symbol=Gpc1 Glypican-1 precursor	Q9QZF2	IPI00015688	IPI:IPI00015688.1|SWISS-PROT:P35052|TREMBL:Q05C97;Q53EX3;Q53QM4|ENSEMBL:ENSP00000264039|REFSEQ:NP_002072|H-INV:HIT000321883|VEGA:OTTHUMP00000164497 Tax_Id=9606 Gene_Symbol=GPC1 Glypican-1 precursor	P35052		4	4	2	2	YES
ab16moc_915	YES	YES	Glipr2	MGI:1917770	GLIPR2	HGNC:18007	ENSMUSG00000028480	ENSG00000122694	384009	152007	Cluster 469	Glipr2	GLIPR2	IPI00416279	IPI:IPI00416279.3|SWISS-PROT:Q9CYL5|TREMBL:A2AJ55|ENSEMBL:ENSMUSP00000030202|REFSEQ:NP_081726|VEGA:OTTMUSP00000007558 Tax_Id=10090 Gene_Symbol=Glipr2 Golgi-associated plant pathogenesis-related protein 1	Q9CYL5	IPI00007067	IPI:IPI00007067.5|SWISS-PROT:Q9H4G4|ENSEMBL:ENSP00000367196|REFSEQ:NP_071738|H-INV:HIT000306019|VEGA:OTTHUMP00000021371;OTTHUMP00000046118 Tax_Id=9606 Gene_Symbol=C9orf19 Golgi-associated plant pathogenesis-related protein 1	Q9H4G4		4	3	2	3	YES	YES
ab16moc_625	YES	YES	Arhgap26	MGI:1918552	ARHGAP26	HGNC:17073	ENSMUSG00000036452	ENSG00000145819	71302	23092	Cluster 1479	Arhgap26	ARHGAP26	IPI00620960	IPI:IPI00620960.3|TREMBL:Q6ZQ82|ENSEMBL:ENSMUSP00000095200|REFSEQ:NP_780373|VEGA:OTTMUSP00000022023 Tax_Id=10090 Gene_Symbol=Arhgap26 Rho GTPase activating protein 26	Q6ZQ82	IPI00007913	IPI:IPI00007913.1|SWISS-PROT:Q9UNA1-1|ENSEMBL:ENSP00000274498;ENSP00000367252|REFSEQ:NP_055886|H-INV:HIT000071189|VEGA:OTTHUMP00000066032;OTTHUMP00000096413 Tax_Id=9606 Gene_Symbol=ARHGAP26 Isoform 1 of Rho GTPase-activating protein 26	Q9UNA1		7	4	4	5	YES
ab16moc_701	YES	YES	Gnb5	MGI:101848	GNB5	HGNC:4401	ENSMUSG00000032192	ENSG00000069966	14697	10681	Cluster 776	Gnb5	GNB5	IPI00378017	IPI:IPI00378017.1|SWISS-PROT:P62881-2|TREMBL:Q3UG14;Q9CU21|REFSEQ:NP_619733 Tax_Id=10090 Gene_Symbol=Gnb5 Isoform 2 of Guanine nucleotide-binding protein subunit beta 5	P62881	IPI00745232	IPI:IPI00745232.1|SWISS-PROT:O14775-2|REFSEQ:NP_006569|VEGA:OTTHUMP00000176287 Tax_Id=9606 Gene_Symbol=GNB5 Isoform 2 of Guanine nucleotide-binding protein subunit beta 5	O14775		6	4	5	5	YES
ab16moc_168	YES	YES	Gnai1	MGI:95771	GNAI1	HGNC:4384	ENSMUSG00000057614	ENSG00000127955	14677	2770	Cluster 72	Gnai1	GNAI1	IPI00467152	IPI:IPI00467152.3|TREMBL:Q61018|ENSEMBL:ENSMUSP00000074259|REFSEQ:NP_034435 Tax_Id=10090 Gene_Symbol=Gnai1 guanine nucleotide binding protein, alpha inhibiting 1	Q61018	IPI00337415	IPI:IPI00337415.9|SWISS-PROT:P63096|TREMBL:O43383|ENSEMBL:ENSP00000343027|REFSEQ:NP_002060|H-INV:HIT000064624|VEGA:OTTHUMP00000025141;OTTHUMP00000065548;OTTHUMP00000161319 Tax_Id=9606 Gene_Symbol=GNAI1 Guanine nucleotide-binding protein G(i), alpha-1 subu	P63096		25	19	20	20	YES
ab16moc_154	YES	YES	Gnai2	MGI:95772	GNAI2	HGNC:4385	ENSMUSG00000032562	ENSG00000114353	14678	2771	Cluster 42	Gnai2	GNAI2	IPI00652902	IPI:IPI00652902.1|TREMBL:Q3TXK7;Q8JZT4;Q922Y6|ENSEMBL:ENSMUSP00000057543|REFSEQ:NP_032164 Tax_Id=10090 Gene_Symbol=Gnai2 Osteoclast-like cell cDNA, RIKEN full-length enriched library, clone:I420010J21 product:guanine nucleotide binding protein, alpha inhi	Q3TXK7	IPI00748145	IPI:IPI00748145.2|SWISS-PROT:P04899-1|TREMBL:Q96C71|ENSEMBL:ENSP00000312999|REFSEQ:NP_002061|H-INV:HIT000035686|VEGA:OTTHUMP00000043597;OTTHUMP00000171252 Tax_Id=9606 Gene_Symbol=GNAI2 Isoform 1 of Guanine nucleotide-binding protein G(i), alpha-2 subunit	P04899		27	20	20	24	YES	YES
ab16moc_721	YES	YES	Gng12	MGI:1336171	GNG12	HGNC:19663	ENSMUSG00000036402	ENSG00000172380	14701	55970	Cluster 84	Gng12	GNG12	IPI00227838	IPI:IPI00227838.3|SWISS-PROT:Q9DAS9|ENSEMBL:ENSMUSP00000046557|REFSEQ:NP_079554 Tax_Id=10090 Gene_Symbol=Gng12 Guanine nucleotide-binding protein G(I)/G(S)/G(O) gamma-12 subunit precursor	Q9DAS9	IPI00221232	IPI:IPI00221232.9|SWISS-PROT:Q9UBI6|TREMBL:Q53GD1;Q69YP5|ENSEMBL:ENSP00000360021|REFSEQ:NP_061329|H-INV:HIT000027343|VEGA:OTTHUMP00000011139;OTTHUMP00000046897 Tax_Id=9606 Gene_Symbol=GNG12 Guanine nucleotide-binding protein G(I)/G(S)/G(O) gamma-12 subuni	Q9UBI6		6	5	4	5	YES
ab16moc_909	YES	YES	Gng2	MGI:102705	GNG2	HGNC:4404	ENSMUSG00000043004	ENSG00000186469	14702	54331	Cluster 111	Gng2	GNG2	IPI00230194	IPI:IPI00230194.5|SWISS-PROT:P63213|ENSEMBL:ENSMUSP00000021431;ENSMUSP00000055256|REFSEQ:NP_001033726;NP_034445 Tax_Id=10090 Gene_Symbol=Gng2 Guanine nucleotide-binding protein G(I)/G(S)/G(O) gamma-2 subunit precursor	P63213	IPI00470619	IPI:IPI00470619.4|SWISS-PROT:P59768|TREMBL:Q5JPE2|ENSEMBL:ENSP00000334448|REFSEQ:NP_444292|H-INV:HIT000027790 Tax_Id=9606 Gene_Symbol=GNG2 Guanine nucleotide-binding protein G(I)/G(S)/G(O) gamma-2 subunit precursor	P59768		4	3	3	3	YES
ab16moc_1094	YES	YES	Gng3	MGI:102704	GNG3	HGNC:4405	ENSMUSG00000071658	ENSG00000162188	14704	2785	Cluster 22	Gng3	GNG3	IPI00129268	IPI:IPI00129268.1|SWISS-PROT:P63216|ENSEMBL:ENSMUSP00000093978|REFSEQ:NP_034446 Tax_Id=10090 Gene_Symbol=Gng3 Guanine nucleotide-binding protein G(I)/G(S)/G(O) gamma-3 subunit precursor	P63216	IPI00023625	IPI:IPI00023625.1|SWISS-PROT:P63215|ENSEMBL:ENSP00000294117|REFSEQ:NP_036334|H-INV:HIT000242645 Tax_Id=9606 Gene_Symbol=GNG3 Guanine nucleotide-binding protein G(I)/G(S)/G(O) gamma-3 subunit precursor	P63215		3	3	3	3	YES
ab16moc_928	YES	YES	Gng7	MGI:95787	GNG7	HGNC:4410	ENSMUSG00000048240	ENSG00000213611	14708	2788	Cluster 144	Gng7	GNG7	IPI00762613	IPI:IPI00762613.1|SWISS-PROT:Q61016|TREMBL:Q3UGB3;Q3UGN1|ENSEMBL:ENSMUSP00000097061 Tax_Id=10090 Gene_Symbol=Gng7 Guanine nucleotide-binding protein G(I)/G(S)/G(O) gamma-7 subunit precursor	Q61016	IPI00028509	IPI:IPI00028509.1|SWISS-PROT:O60262|ENSEMBL:ENSP00000326294|REFSEQ:NP_443079|H-INV:HIT000036718|VEGA:OTTHUMP00000066496;OTTHUMP00000076752 Tax_Id=9606 Gene_Symbol=GNG7 Guanine nucleotide-binding protein G(I)/G(S)/G(O) gamma-7 subunit precursor	O60262		4	2	4	2	YES
ab16moc_82	YES	YES	Gnao1	MGI:95775	GNAO1	HGNC:4389	ENSMUSG00000031748	ENSG00000087258	14681	2775	Cluster 6	Gnao1	GNAO1	IPI00230192	IPI:IPI00230192.5|SWISS-PROT:P18872|TREMBL:Q543S2|ENSEMBL:ENSMUSP00000034198|REFSEQ:NP_034438 Tax_Id=10090 Gene_Symbol=Gnao1 Guanine nucleotide-binding protein G(o) subunit alpha 1	P18872	IPI00398700	IPI:IPI00398700.3|SWISS-PROT:P29777|TREMBL:Q6AWC5|ENSEMBL:ENSP00000262494|REFSEQ:NP_620073|VEGA:OTTHUMP00000067007;OTTHUMP00000080688;OTTHUMP00000164319 Tax_Id=9606 Gene_Symbol=GNAO1 Guanine nucleotide-binding protein G(o) subunit alpha 2	P29777		37	35	33	32	YES	YES
ab16moc_353	YES	YES	Gnaq	MGI:95776	GNAQ	HGNC:4390	ENSMUSG00000024639	ENSG00000156052	14682	2776	Cluster 315	Gnaq	GNAQ	IPI00228618	IPI:IPI00228618.5|SWISS-PROT:P21279|TREMBL:Q3UHH5|ENSEMBL:ENSMUSP00000025541|REFSEQ:NP_032165 Tax_Id=10090 Gene_Symbol=Gnaq CDNA, RIKEN full-length enriched library, clone:M5C1028J20 product:guanine nucleotide binding protein, alpha q polypeptide, full in	P21279	IPI00288947	IPI:IPI00288947.3|SWISS-PROT:P50148|TREMBL:Q6NT27|ENSEMBL:ENSP00000286548;ENSP00000365796|REFSEQ:NP_002063|H-INV:HIT000259715|VEGA:OTTHUMP00000021516;OTTHUMP00000021518 Tax_Id=9606 Gene_Symbol=GNAQ Guanine nucleotide binding protein (G protein), q polypep	P50148		14	9	10	7	YES
ab16moc_390	YES	YES	Gnas	MGI:95777	GNAS	HGNC:4392	ENSMUSG00000027523	ENSG00000087460	14683	2778	Cluster 243	Gnas	GNAS	IPI00119853	IPI:IPI00119853.1|SWISS-PROT:P63094-1|ENSEMBL:ENSMUSP00000085179|REFSEQ:NP_963910|VEGA:OTTMUSP00000017631 Tax_Id=10090 Gene_Symbol=Gnas Isoform Gnas-1 of Guanine nucleotide-binding protein G(s) subunit alpha isoforms short	P63094	IPI00219835	IPI:IPI00219835.1|SWISS-PROT:P63092-2|ENSEMBL:ENSP00000360136|REFSEQ:NP_536351|VEGA:OTTHUMP00000031742;OTTHUMP00000064245 Tax_Id=9606 Gene_Symbol=GNAS Isoform Gnas-2 of Guanine nucleotide-binding protein G(s) subunit alpha isoforms short	P63092		12	9	9	9	YES	YES
ab16moc_162	YES	YES	Gnaz	MGI:95780	GNAZ	HGNC:4395	ENSMUSG00000040009	ENSG00000128266	14687	2781	Cluster 88	Gnaz	GNAZ	IPI00230193	IPI:IPI00230193.7|SWISS-PROT:O70443|TREMBL:Q3UYF9;Q542R8|ENSEMBL:ENSMUSP00000036087|REFSEQ:NP_034441 Tax_Id=10090 Gene_Symbol=Gnaz Guanine nucleotide-binding protein G	O70443	IPI00328128	IPI:IPI00328128.6|SWISS-PROT:P19086|TREMBL:Q8IY73;Q8N652|ENSEMBL:ENSP00000248996|REFSEQ:NP_002064|H-INV:HIT000265722|VEGA:OTTHUMP00000028947;OTTHUMP00000042118 Tax_Id=9606 Gene_Symbol=GNAZ Guanine nucleotide-binding protein G	P19086		26	18	23	18	YES	YES
ab16moc_591	YES	YES	Gna11	MGI:95766	GNA11	HGNC:4379	ENSMUSG00000034781	ENSG00000088256	14672	2767	Cluster 315	Gna11	GNA11	IPI00121387	IPI:IPI00121387.1|SWISS-PROT:P21278|TREMBL:Q3UPA1;Q91X95|ENSEMBL:ENSMUSP00000043190|REFSEQ:NP_034431 Tax_Id=10090 Gene_Symbol=Gna11 Guanine nucleotide-binding protein alpha-11 subunit	P21278	IPI00305551	IPI:IPI00305551.3|SWISS-PROT:P29992|TREMBL:Q59FM5|ENSEMBL:ENSP00000078429|REFSEQ:NP_002058|H-INV:HIT000266221|VEGA:OTTHUMP00000042010;OTTHUMP00000076749 Tax_Id=9606 Gene_Symbol=GNA11 Guanine nucleotide-binding protein subunit alpha-11	P29992		8	5	7	3	YES
ab16moc_694	YES	YES	Gna13	MGI:95768	GNA13	HGNC:4381	ENSMUSG00000020611	ENSG00000120063	14674	10672	Cluster 715	Gna13	GNA13	IPI00118569	IPI:IPI00118569.1|SWISS-PROT:P27601|TREMBL:A2AA49;Q3UE40|ENSEMBL:ENSMUSP00000020930|REFSEQ:NP_034433|VEGA:OTTMUSP00000003361 Tax_Id=10090 Gene_Symbol=Gna13 Guanine nucleotide-binding protein alpha-13 subunit	P27601	IPI00290928	IPI:IPI00290928.2|SWISS-PROT:Q14344|ENSEMBL:ENSP00000239138|REFSEQ:NP_006563|H-INV:HIT000051796|VEGA:OTTHUMP00000070737;OTTHUMP00000182222 Tax_Id=9606 Gene_Symbol=GNA13 Guanine nucleotide-binding protein alpha-13 subunit	Q14344		6	3	5	4	YES	YES
ab16moc_726	YES	YES	Gna14	MGI:95769	GNA14	HGNC:4382	ENSMUSG00000024697	ENSG00000156049	14675	9630	Cluster 833	Gna14	GNA14	IPI00132361	IPI:IPI00132361.1|SWISS-PROT:P30677 Tax_Id=10090 Gene_Symbol=Gna14 Guanine nucleotide-binding protein alpha-14 subunit	P30677	IPI00000695	IPI:IPI00000695.1|SWISS-PROT:O95837|TREMBL:Q5VYN0|ENSEMBL:ENSP00000365807|REFSEQ:NP_004288|H-INV:HIT000050926|VEGA:OTTHUMP00000021515;OTTHUMP00000063617 Tax_Id=9606 Gene_Symbol=GNA14 Guanine nucleotide-binding protein alpha-14 subunit	O95837		6	3	6	3	YES
ab16moc_236	YES	YES	Hspa12a	MGI:1920692	HSPA12A	HGNC:19022	ENSMUSG00000025092	ENSG00000165868	73442	259217	Cluster 446	Hspa12a	HSPA12A	IPI00279443	IPI:IPI00279443.1|SWISS-PROT:Q8K0U4|ENSEMBL:ENSMUSP00000066860|REFSEQ:NP_780408 Tax_Id=10090 Gene_Symbol=Hspa12a Heat shock 70 kDa protein 12A	Q8K0U4	IPI00011932	IPI:IPI00011932.8|SWISS-PROT:O43301|ENSEMBL:ENSP00000298777;ENSP00000358211|REFSEQ:NP_079291|H-INV:HIT000000134|VEGA:OTTHUMP00000020566;OTTHUMP00000067601 Tax_Id=9606 Gene_Symbol=HSPA12A Heat shock 70 kDa protein 12A	O43301		19	17	15	13	YES	YES
ab16moc_1247	YES	YES	Hsph1	MGI:105053	HSPH1	HGNC:16969	ENSMUSG00000029657	ENSG00000120694	15505	10808	Cluster 799	Hsp110	HSPH1	IPI00123802	IPI:IPI00123802.5|SWISS-PROT:Q61699-1|ENSEMBL:ENSMUSP00000074392;ENSMUSP00000075746|REFSEQ:NP_038587|VEGA:OTTMUSP00000023701;OTTMUSP00000023705 Tax_Id=10090 Gene_Symbol=Hsp110 Isoform HSP105-alpha of Heat-shock protein 105 kDa	Q61699	IPI00218993	IPI:IPI00218993.1|SWISS-PROT:Q92598-2|ENSEMBL:ENSP00000369768|VEGA:OTTHUMP00000018209;OTTHUMP00000018216 Tax_Id=9606 Gene_Symbol=HSPH1 Isoform Beta of Heat-shock protein 105 kDa	Q92598		2	1	2	1		YES
ab16moc_134	YES	YES	Hspa5	MGI:95835	HSPA5	HGNC:5238	ENSMUSG00000026864	ENSG00000044574	14828	3309	Cluster 132	Hspa5	HSPA5	IPI00319992	IPI:IPI00319992.1|SWISS-PROT:P20029|TREMBL:A2AUF6;Q3TI47;Q3TKF8;Q3TUS2;Q3TWF2;Q3U6V3;Q3U7T8;Q3U9G2;Q3UEM8;Q9DC41|ENSEMBL:ENSMUSP00000028222;ENSMUSP00000097747|REFSEQ:NP_071705|VEGA:OTTMUSP00000012896;OTTMUSP00000012897 Tax_Id=10090 Gene_Symbol=Hspa5 78 kD	P20029	IPI00003362	IPI:IPI00003362.2|SWISS-PROT:P11021|TREMBL:Q2KHP4|ENSEMBL:ENSP00000324173|REFSEQ:NP_005338|H-INV:HIT000038771|VEGA:OTTHUMP00000022124;OTTHUMP00000022125 Tax_Id=9606 Gene_Symbol=HSPA5 HSPA5 protein	P11021		30	27	22	25	YES	YES
ab16moc_234	YES	YES	Hspa9	MGI:96245	HSPA9	HGNC:5244	ENSMUSG00000024359	ENSG00000113013	15526	3313	Cluster 368	Hspa9	HSPA9	IPI00133903	IPI:IPI00133903.1|SWISS-PROT:P38647|TREMBL:Q3TW93;Q3UVN1;Q3V015;Q7TSZ0|ENSEMBL:ENSMUSP00000025217|REFSEQ:NP_034611 Tax_Id=10090 Gene_Symbol=Hspa9 Stress-70 protein, mitochondrial precursor	P38647	IPI00007765	IPI:IPI00007765.5|SWISS-PROT:P38646|TREMBL:A1XP52;Q1HB43;Q2F839;Q8N1C8|ENSEMBL:ENSP00000297185|REFSEQ:NP_004125|H-INV:HIT000192047|VEGA:OTTHUMP00000063370;OTTHUMP00000159494 Tax_Id=9606 Gene_Symbol=HSPA9 Stress-70 protein, mitochondrial precursor	P38646		19	18	13	12	YES	YES
ab16moc_251	YES	YES	Hspa2	MGI:96243	HSPA2	HGNC:5235	ENSMUSG00000059970	ENSG00000126803	15512	3306	Cluster 283	Hspa2	HSPA2	IPI00387494	IPI:IPI00387494.1|TREMBL:Q99KD7|ENSEMBL:ENSMUSP00000079306|REFSEQ:NP_001002012;NP_032327 Tax_Id=10090 Gene_Symbol=Hspa2 heat shock protein 2	Q99KD7	IPI00007702	IPI:IPI00007702.1|SWISS-PROT:P54652|TREMBL:Q53XM3|ENSEMBL:ENSP00000247207|REFSEQ:NP_068814|H-INV:HIT000030626|VEGA:OTTHUMP00000028319;OTTHUMP00000180664 Tax_Id=9606 Gene_Symbol=HSPA2 Heat shock-related 70 kDa protein 2	P54652		18	17	12	16	YES	YES
ab16moc_67	YES	YES	Hspa8	MGI:105384	HSPA8	HGNC:5241	ENSMUSG00000015656	ENSG00000109971	15481	3312	Cluster 40	Hspa8	HSPA8	IPI00323357	IPI:IPI00480560.1|ENSEMBL:ENSMUSP00000071889 Tax_Id=10090 Gene_Symbol=- 71 kDa protein	P63017	IPI00003865	IPI:IPI00003865.1|SWISS-PROT:P11142-1|TREMBL:Q53GZ6;Q96BE0;Q96H53;Q96IS6;Q9NWW3;Q9NZ87|ENSEMBL:ENSP00000227378|REFSEQ:NP_006588|H-INV:HIT000037619|VEGA:OTTHUMP00000041528 Tax_Id=9606 Gene_Symbol=HSPA8 Isoform 1 of Heat shock cognate 71 kDa protein	P11142		42	41	37	39	YES	YES
ab16moc_1046	YES	YES	Hspa4l	MGI:107422	HSPA4L	HGNC:17041	ENSMUSG00000025757	ENSG00000164070	18415	22824	Cluster 1579	Hspa4l	HSPA4L	IPI00317711	IPI:IPI00317711.1|SWISS-PROT:P48722-2 Tax_Id=10090 Gene_Symbol=Hspa4l Isoform 2 of Heat shock 70 kDa protein 4L	P48722	IPI00295485	IPI:IPI00295485.1|SWISS-PROT:O95757 Tax_Id=9606 Gene_Symbol=HSPA4L Heat shock 70 kDa protein 4L	O95757		3	1	2			YES
ab16moc_769	YES	YES	Hspa4	MGI:1342292	HSPA4	HGNC:5237	ENSMUSG00000020361	ENSG00000170606	15525	3308	Cluster 1317	Hspa4	HSPA4	IPI00331556	IPI:IPI00331556.5|SWISS-PROT:Q61316|TREMBL:Q571M2;Q5NCS5;Q8C6R3;Q99L75|ENSEMBL:ENSMUSP00000020630|REFSEQ:NP_032326|VEGA:OTTMUSP00000000078 Tax_Id=10090 Gene_Symbol=Hspa4 Heat shock 70 kDa protein 4	Q61316	IPI00002966	IPI:IPI00002966.1|SWISS-PROT:P34932|TREMBL:O14992;Q2TAL4;Q59GF8;Q7KYN0|ENSEMBL:ENSP00000302961|REFSEQ:NP_002145|H-INV:HIT000058763|VEGA:OTTHUMP00000159262 Tax_Id=9606 Gene_Symbol=HSPA4 Heat shock 70 kDa protein 4	P34932		5	2		3		YES
ab16moc_661	YES	YES	Hnrnpk	MGI:99894	HNRNPK	HGNC:5044	ENSMUSG00000021546	ENSG00000165119	15387	3190	Cluster 988	Hnrpk	HNRPK	IPI00465574	IPI:IPI00465574.2|SWISS-PROT:P61979-3|TREMBL:Q3U6X2;Q3U9Q3|ENSEMBL:ENSMUSP00000039269 Tax_Id=10090 Gene_Symbol=Hnrpk Bone marrow macrophage cDNA, RIKEN full-length enriched library, clone:I830091E20 product:heterogeneous nuclear ribonucleoprotein K, full	P61979	IPI00216746	IPI:IPI00216746.1|SWISS-PROT:P61978-2|TREMBL:Q5EC54;Q6IBN1|ENSEMBL:ENSP00000365444;ENSP00000365458|REFSEQ:NP_002131;NP_112553|VEGA:OTTHUMP00000021554;OTTHUMP00000021557;OTTHUMP00000063633 Tax_Id=9606 Gene_Symbol=HNRPK Isoform 2 of Heterogeneous nuclear ri	P61978		7	4		5
ab16moc_409	YES	YES	Hnrnpm	MGI:1926465	HNRNPM	HGNC:5046	ENSMUSG00000059208	ENSG00000099783	76936	4670	Cluster 580	Hnrpm	HNRPM	IPI00480357	IPI:IPI00480357.6|SWISS-PROT:Q9D0E1-2|TREMBL:Q3THB3;Q3TQ66;Q3TW40;Q3UCL9;Q570Z0|ENSEMBL:ENSMUSP00000084864 Tax_Id=10090 Gene_Symbol=Hnrpm Isoform 2 of Heterogeneous nuclear ribonucleoprotein M	Q9D0E1	IPI00383296	IPI:IPI00383296.5|SWISS-PROT:P52272-2|TREMBL:Q6P2D7;Q8TCM5|ENSEMBL:ENSP00000325732|REFSEQ:NP_112480|H-INV:HIT000193052|VEGA:OTTHUMP00000076813 Tax_Id=9606 Gene_Symbol=HNRPM Isoform 2 of Heterogeneous nuclear ribonucleoprotein M	P52272		12	12	6	8	YES
ab16moc_1044	YES	YES	Vsnl1	MGI:1349453	VSNL1	HGNC:12722	ENSMUSG00000054459	ENSG00000163032	26950	7447	Cluster 248	Vsnl1	VSNL1	IPI00230418	IPI:IPI00230418.5|SWISS-PROT:P62761|TREMBL:Q3TVC0;Q4W4C9|ENSEMBL:ENSMUSP00000072145|REFSEQ:NP_036168 Tax_Id=10090 Gene_Symbol=Vsnl1 Visinin-like protein 1	P62761	IPI00216313	IPI:IPI00216313.7|SWISS-PROT:P62760|TREMBL:Q4ZFX3;Q53RT2|ENSEMBL:ENSP00000295156;ENSP00000370714|REFSEQ:NP_003376|H-INV:HIT000300338|VEGA:OTTHUMP00000115804 Tax_Id=9606 Gene_Symbol=VSNL1 Visinin-like protein 1	P62760		3	3	3	3	YES	YES
ab16moc_1047	YES	YES	Hpca	MGI:1336200	HPCA	HGNC:5144	ENSMUSG00000028785	ENSG00000121905	15444	3208	Cluster 299	Hpca	HPCA	IPI00230310	IPI:IPI00230310.5|SWISS-PROT:P84075|TREMBL:A2A7R4|ENSEMBL:ENSMUSP00000030572|REFSEQ:NP_034601|VEGA:OTTMUSP00000010096;OTTMUSP00000010097 Tax_Id=10090 Gene_Symbol=Hpca Neuron-specific calcium-binding protein hippocalcin	P84075	IPI00219103	IPI:IPI00219103.6|SWISS-PROT:P84074|TREMBL:Q5U068|ENSEMBL:ENSP00000362566|REFSEQ:NP_002134|H-INV:HIT000030642|VEGA:OTTHUMP00000004138;OTTHUMP00000046039 Tax_Id=9606 Gene_Symbol=HPCA Neuron-specific calcium-binding protein hippocalcin	P84074		3	2	3	3	YES
ab16moc_1082	YES	YES	Ncald	MGI:1196326	NCALD	HGNC:7655	ENSMUSG00000051359	ENSG00000104490	52589	83988	Cluster 299	Ncald	NCALD	IPI00263638	IPI:IPI00263638.8|SWISS-PROT:Q91X97|ENSEMBL:ENSMUSP00000087611|REFSEQ:NP_598855;XP_987686;XP_987730;XP_987774;XP_987837;XP_987878;XP_987925;XP_987954 Tax_Id=10090 Gene_Symbol=Ncald Neurocalcin-delta	Q91X97	IPI00395510	IPI:IPI00395510.5|SWISS-PROT:P61601|ENSEMBL:ENSP00000310587|REFSEQ:NP_001035714;NP_001035715;NP_001035716;NP_001035717;NP_001035718;NP_001035719;NP_001035720;NP_114430|H-INV:HIT000021370|VEGA:OTTHUMP00000178170;OTTHUMP00000178173;OTTHUMP00000178174 Tax_Id	P61601		3	2	3
ab16moc_89	YES	YES	Homer1	MGI:1347345	HOMER1	HGNC:17512	ENSMUSG00000007617	ENSG00000152413	26556	9456	Cluster 29	Homer1	HOMER1	IPI00395134	IPI:IPI00395134.4|SWISS-PROT:Q9Z2Y3-1|REFSEQ:NP_671705|VEGA:OTTMUSP00000021807 Tax_Id=10090 Gene_Symbol=Homer1 Isoform 1 of Homer protein homolog 1	Q9Z2Y3	IPI00003566	IPI:IPI00003566.3|SWISS-PROT:Q86YM7-1|TREMBL:Q53F18;Q5U5K4;Q86YM6|ENSEMBL:ENSP00000334382|REFSEQ:NP_004263|H-INV:HIT000037145|VEGA:OTTHUMP00000045954;OTTHUMP00000165782 Tax_Id=9606 Gene_Symbol=HOMER1 Isoform 1 of Homer protein homolog 1	Q86YM7		36	28	27	24	YES	YES
ab16moc_374	YES	YES	Homer2	MGI:1347354	HOMER2	HGNC:17513	ENSMUSG00000025813	ENSG00000103942	26557	9455	Cluster 351	Homer2	HOMER2	IPI00134508	IPI:IPI00134508.1|SWISS-PROT:Q9QWW1-1|TREMBL:Q8CFI9;Q9CTG4|ENSEMBL:ENSMUSP00000026922|REFSEQ:NP_036113 Tax_Id=10090 Gene_Symbol=Homer2 Isoform 1 of Homer protein homolog 2	Q9QWW1	IPI00394746	IPI:IPI00394746.3|SWISS-PROT:Q9NSB8-2|REFSEQ:NP_004830|H-INV:HIT000066482|VEGA:OTTHUMP00000176586 Tax_Id=9606 Gene_Symbol=HOMER2 Isoform 2 of Homer protein homolog 2	Q9NSB8		13	5	8	10	YES
ab16moc_1341	YES	YES	Hook3	MGI:2443554	HOOK3	HGNC:23576	ENSMUSG00000037234	ENSG00000168172	320191	84376	Cluster 2657	Hook3	HOOK3	IPI00353927	IPI:IPI00353927.11|SWISS-PROT:Q8BUK6|TREMBL:Q3UUZ6;Q540A0;Q5BKS5|ENSEMBL:ENSMUSP00000093026|REFSEQ:NP_997542 Tax_Id=10090 Gene_Symbol=Hook3 Hook homolog 3	Q8BUK6	IPI00031768	IPI:IPI00031768.1|SWISS-PROT:Q86VS8|ENSEMBL:ENSP00000305699|REFSEQ:NP_115786|H-INV:HIT000054129|VEGA:OTTHUMP00000177444 Tax_Id=9606 Gene_Symbol=HOOK3 Hook homolog 3	Q86VS8		2		1	1
ab16moc_917	YES	YES	Hip1	MGI:1099804	HIP1	HGNC:4913	ENSMUSG00000039959	ENSG00000127946	215114	3092	Cluster 2214	Hip1	HIP1	IPI00331578	IPI:IPI00331578.5|TREMBL:Q571K7;Q8VD75|ENSEMBL:ENSMUSP00000037540|REFSEQ:NP_666113 Tax_Id=10090 Gene_Symbol=Hip1 Huntingtin interacting protein 1	Q571K7	IPI00782965	IPI:IPI00782965.1|SWISS-PROT:O00291|TREMBL:Q2TB58;Q8TDA4|ENSEMBL:ENSP00000373653|REFSEQ:NP_005329|H-INV:HIT000078427|VEGA:OTTHUMP00000096493 Tax_Id=9606 Gene_Symbol=HIP1 Huntingtin-interacting protein 1	O00291		4	3	1	1
ab16moc_798	YES	YES	Hip1r	MGI:1352504	HIP1R	HGNC:18415	ENSMUSG00000000915	ENSG00000130787	29816	9026	Cluster 1980	Hip1r	HIP1R	IPI00311726	IPI:IPI00311726.3|SWISS-PROT:Q9JKY5|TREMBL:Q3UJ14;Q6P1F5;Q6ZQ77;Q80UP1;Q8BPA2;Q9D689|ENSEMBL:ENSMUSP00000000939|REFSEQ:NP_659507 Tax_Id=10090 Gene_Symbol=Hip1r Huntingtin-interacting protein 1-related protein	Q9JKY5	IPI00024417	IPI:IPI00024417.1|SWISS-PROT:O75146|ENSEMBL:ENSP00000374600;ENSP00000374601|REFSEQ:NP_003950|H-INV:HIT000000380|VEGA:OTTHUMP00000082948;OTTHUMP00000169686 Tax_Id=9606 Gene_Symbol=HIP1R Huntingtin-interacting protein 1-related protein	O75146		5	4	2	2	YES
ab16moc_324	YES	YES	Hapln1	MGI:1337006	HAPLN1	HGNC:2380	ENSMUSG00000021613	ENSG00000145681	12950	1404	Cluster 267	Hapln1	HAPLN1	IPI00131995	IPI:IPI00131995.1|SWISS-PROT:Q9QUP5|ENSEMBL:ENSMUSP00000022108|REFSEQ:NP_038528 Tax_Id=10090 Gene_Symbol=Hapln1 Hyaluronan and proteoglycan link protein 1 precursor	Q9QUP5	IPI00023601	IPI:IPI00023601.1|SWISS-PROT:P10915|ENSEMBL:ENSP00000274341;ENSP00000369486|REFSEQ:NP_001875|H-INV:HIT000219844|VEGA:OTTHUMP00000147586 Tax_Id=9606 Gene_Symbol=HAPLN1 Hyaluronan and proteoglycan link protein 1 precursor	P10915		15	8	11	10	YES
ab16moc_1345	YES	YES	Pnkd	MGI:1930773	PNKD	HGNC:9153	ENSMUSG00000026179	ENSG00000127838	56695	25953	Cluster 1078	Pnkd	PNKD	IPI00453946	IPI:IPI00453946.2|TREMBL:Q6PD45|ENSEMBL:ENSMUSP00000084478|VEGA:OTTMUSP00000024292 Tax_Id=10090 Gene_Symbol=Pnkd Pnkd protein	Q6PD45	IPI00001022	IPI:IPI00001022.5|TREMBL:Q96A48|ENSEMBL:ENSP00000248451|REFSEQ:NP_001070867 Tax_Id=9606 Gene_Symbol=PNKD myofibrillogenesis regulator 1 isoform 3	Q96A48		2		2
ab16moc_626	YES	YES	Igsf21	MGI:2681842	IGSF21	HGNC:28246	ENSMUSG00000040972	ENSG00000117154	230868	84966	Cluster 888	Igsf21	IGSF21	IPI00380338	IPI:IPI00380338.1|SWISS-PROT:Q7TNR6|ENSEMBL:ENSMUSP00000046558|REFSEQ:NP_941012|VEGA:OTTMUSP00000010691 Tax_Id=10090 Gene_Symbol=Igsf21 Immunoglobulin superfamily member 21 precursor	Q7TNR6	IPI00301255	IPI:IPI00301255.2|SWISS-PROT:Q96ID5|ENSEMBL:ENSP00000251296|REFSEQ:NP_116269|H-INV:HIT000082351|VEGA:OTTHUMP00000002532;OTTHUMP00000044609 Tax_Id=9606 Gene_Symbol=IGSF21 Immunoglobulin superfamily member 21 precursor	Q96ID5		7	6	6	5	YES	YES
ab16moc_896	YES	YES	Kpnb1	MGI:107532	KPNB1	HGNC:6400	ENSMUSG00000001440	ENSG00000108424	16211	3837	Cluster 946	Kpnb1	KPNB1	IPI00323881	IPI:IPI00323881.1|SWISS-PROT:P70168 Tax_Id=10090 Gene_Symbol=Kpnb1 Importin beta-1 subunit	P70168	IPI00001639	IPI:IPI00001639.2|SWISS-PROT:Q14974|TREMBL:Q53XN2|ENSEMBL:ENSP00000290158|REFSEQ:NP_002256|H-INV:HIT000193420|VEGA:OTTHUMP00000035030;OTTHUMP00000181581 Tax_Id=9606 Gene_Symbol=KPNB1 Importin beta-1 subunit	Q14974		4	4	4	4	YES	YES
ab16moc_1256	YES	YES	Ipo5	MGI:1917822	IPO5	HGNC:6402	ENSMUSG00000030662	ENSG00000065150	70572	3843	Cluster 1480	Ranbp5	RANBP5	IPI00626994	IPI:IPI00626994.3|SWISS-PROT:Q8BKC5-1|TREMBL:Q3TT04;Q6NZC1;Q7TN23|ENSEMBL:ENSMUSP00000032898|REFSEQ:NP_076068 Tax_Id=10090 Gene_Symbol=Ranbp5 Isoform 1 of Importin beta-3	Q8BKC5	IPI00783829	IPI:IPI00783829.3|SWISS-PROT:O00410|TREMBL:Q5T578;Q9BVS9|ENSEMBL:ENSP00000350219|VEGA:OTTHUMP00000018583 Tax_Id=9606 Gene_Symbol=RANBP5 Importin beta-3	O00410		2	1	2			YES
ab16moc_113	YES	YES	Itsn1	MGI:1338069	ITSN1	HGNC:6183	ENSMUSG00000022957	ENSG00000205726	16443	6453	Cluster 709	Itsn1	ITSN1	IPI00129356	IPI:IPI00129356.1|SWISS-PROT:Q9Z0R4-1|TREMBL:Q6J1F0;Q8C4B5;Q8R358|ENSEMBL:ENSMUSP00000023678|REFSEQ:NP_034717|VEGA:OTTMUSP00000023652 Tax_Id=10090 Gene_Symbol=Itsn1 Isoform 1 of Intersectin-1	Q9Z0R4	IPI00304740	IPI:IPI00304740.2|SWISS-PROT:Q15811-1|TREMBL:Q14BD3;Q14BD4|ENSEMBL:ENSP00000370719|REFSEQ:NP_003015|H-INV:HIT000069838|VEGA:OTTHUMP00000067855;OTTHUMP00000070538 Tax_Id=9606 Gene_Symbol=ITSN1 Isoform 1 of Intersectin-1	Q15811		33	20	14	20	YES	YES
ab16moc_453	YES	YES	Itsn2	MGI:1338049	ITSN2	HGNC:6184	ENSMUSG00000020640	ENSG00000198399	20403	50618	Cluster 1733	Itsn2	ITSN2	IPI00762547	IPI:IPI00762547.1|SWISS-PROT:Q9Z0R6-1|TREMBL:Q3V3Y8;Q80TG5|ENSEMBL:ENSMUSP00000052758|REFSEQ:NP_035495 Tax_Id=10090 Gene_Symbol=Itsn2 Isoform 1 of Intersectin-2	Q9Z0R6	IPI00414027	IPI:IPI00414027.3|SWISS-PROT:Q9NZM3-1|TREMBL:Q53TK4|ENSEMBL:ENSP00000347244;ENSP00000370265|REFSEQ:NP_006268|H-INV:HIT000072847|VEGA:OTTHUMP00000116038 Tax_Id=9606 Gene_Symbol=ITSN2 Intersectin 2 (SH3 domain-containing protein 1B) (SH3P18) (SH3P18-like WA	Q9NZM3		11	5	5	7	YES
ab16moc_370	YES	YES	Icam5	MGI:109430	ICAM5	HGNC:5348	ENSMUSG00000032174	ENSG00000105376	15898	7087	Cluster 790	Icam5	ICAM5	IPI00119033	IPI:IPI00119033.1|SWISS-PROT:Q60625|TREMBL:Q2KHL7;Q3UY19|ENSEMBL:ENSMUSP00000019616|REFSEQ:NP_032345 Tax_Id=10090 Gene_Symbol=Icam5 Intercellular adhesion molecule 5 precursor	Q60625	IPI00290456	IPI:IPI00290456.3|SWISS-PROT:Q9UMF0 Tax_Id=9606 Gene_Symbol=ICAM5 Intercellular adhesion molecule 5 precursor	Q9UMF0		13	7	11	10	YES	YES
ab16moc_97	YES	YES	Iqsec1	MGI:1196356	IQSEC1	HGNC:29112	ENSMUSG00000034312	ENSG00000144711	232227	9922	Cluster 310	Iqsec1	IQSEC1	IPI00762507	IPI:IPI00762507.1|SWISS-PROT:Q8R0S2-1|ENSEMBL:ENSMUSP00000098712 Tax_Id=10090 Gene_Symbol=Iqsec1 Isoform 1 of IQ motif and Sec7 domain-containing protein 1	Q8R0S2	IPI00457114	IPI:IPI00457114.2|SWISS-PROT:Q6DN90-1|ENSEMBL:ENSP00000273221|REFSEQ:NP_055684|H-INV:HIT000255949|VEGA:OTTHUMP00000063386;OTTHUMP00000170290 Tax_Id=9606 Gene_Symbol=IQSEC1 Isoform 1 of IQ motif and Sec7 domain-containing protein 1	Q6DN90		35	22	23	22	YES	YES
ab16moc_32	YES	YES	Iqsec2	MGI:3528396	IQSEC2	HGNC:29059	ENSMUSG00000041115	ENSG00000124313	245666	23096	Cluster 235	Iqsec2	IQSEC2	IPI00758248	IPI:IPI00758248.3|SWISS-PROT:Q5DU25|TREMBL:A4GZ26|ENSEMBL:ENSMUSP00000078978|VEGA:OTTMUSP00000021283 Tax_Id=10090 Gene_Symbol=Iqsec2 IQ motif and Sec7 domain-containing protein 2	Q5DU25	IPI00759479	IPI:IPI00759479.1|SWISS-PROT:Q5JU85-1|ENSEMBL:ENSP00000364517|H-INV:HIT000000239|VEGA:OTTHUMP00000023347;OTTHUMP00000061872 Tax_Id=9606 Gene_Symbol=IQSEC2 IMP dehydrogenase/GMP reductase family protein	Q5JU85		59	45	39	45	YES	YES
ab16moc_585	YES	YES	Iqsec3	MGI:2677208	IQSEC3	HGNC:29193	ENSMUSG00000040797	ENSG00000120645	243621	440073	Cluster 1764	Iqsec3	IQSEC3	IPI00330167	IPI:IPI00330167.4|SWISS-PROT:Q3TES0|ENSEMBL:ENSMUSP00000038653|REFSEQ:NP_001028526 Tax_Id=10090 Gene_Symbol=Iqsec3 IQ motif and Sec7 domain-containing protein 3	Q3TES0	IPI00739462	IPI:IPI00739462.2|SWISS-PROT:Q9UPP2|ENSEMBL:ENSP00000374042|REFSEQ:XP_941924 Tax_Id=9606 Gene_Symbol=IQSEC3 IQ motif and Sec7 domain-containing protein 3	Q9UPP2		8	5	5	4	YES
ab16moc_779	YES	YES	Idh3a	MGI:1915084	IDH3A	HGNC:5384	ENSMUSG00000032279	ENSG00000166411	67834	3419	Cluster 656	Idh3a	IDH3A	IPI00459725	IPI:IPI00459725.2|SWISS-PROT:Q9D6R2-1|ENSEMBL:ENSMUSP00000034818|REFSEQ:NP_083849 Tax_Id=10090 Gene_Symbol=Idh3a Isoform 1 of Isocitrate dehydrogenase [NAD] subunit alpha, mitochondrial precursor	Q9D6R2	IPI00607898	IPI:IPI00607898.2|SWISS-PROT:P50213-2|VEGA:OTTHUMP00000063415 Tax_Id=9606 Gene_Symbol=IDH3A Isoform 2 of Isocitrate dehydrogenase [NAD] subunit alpha, mitochondrial precursor	P50213		5	3	5	2	YES
ab16moc_510	YES	YES	Klc2	MGI:107953	KLC2	HGNC:20716	ENSMUSG00000024862	ENSG00000174996	16594	64837	Cluster 861	Klc2	KLC2	IPI00753928	IPI:IPI00753928.1|TREMBL:Q91YS4|ENSEMBL:ENSMUSP00000025798|REFSEQ:NP_032477|VEGA:OTTMUSP00000017579 Tax_Id=10090 Gene_Symbol=Klc2 kinesin light chain 2	Q91YS4	IPI00021634	IPI:IPI00021634.3|SWISS-PROT:Q9H0B6|ENSEMBL:ENSP00000314837|REFSEQ:NP_073733|H-INV:HIT000025460|VEGA:OTTHUMP00000065292;OTTHUMP00000165216;OTTHUMP00000165218 Tax_Id=9606 Gene_Symbol=KLC2 Kinesin light chain 2	Q9H0B6		9	7	7	7	YES	YES
ab16moc_930	YES	YES	Klc1	MGI:107978	KLC1	HGNC:6387	ENSMUSG00000021288	ENSG00000126214	16593	3831	Cluster 1727	Klc1	KLC1	IPI00620804	IPI:IPI00620804.1|TREMBL:Q7M6Z6|ENSEMBL:ENSMUSP00000021717 Tax_Id=10090 Gene_Symbol=Klc1 Kinesin light chain 1T	Q7M6Z6	IPI00397666	IPI:IPI00397666.1|SWISS-PROT:Q07866-8 Tax_Id=9606 Gene_Symbol=KLC1 Isoform S of Kinesin light chain 1	Q07866		4		2	2		YES
ab16moc_1276	YES	YES	Ldha	MGI:96759	LDHA	HGNC:6535	ENSMUSG00000063229	ENSG00000134333	16828	3939	Cluster 1196	Ldha	LDHA	IPI00319994	IPI:IPI00319994.6|SWISS-PROT:P06151|TREMBL:Q3UDU4;Q3UIC3;Q564E2;Q99K20|ENSEMBL:ENSMUSP00000036386|REFSEQ:NP_034829|VEGA:OTTMUSP00000017774 Tax_Id=10090 Gene_Symbol=Ldha L-lactate dehydrogenase A chain	P06151	IPI00217966	IPI:IPI00217966.7|SWISS-PROT:P00338-1|ENSEMBL:ENSP00000227157|REFSEQ:NP_005557|H-INV:HIT000049306|VEGA:OTTHUMP00000081810;OTTHUMP00000165205 Tax_Id=9606 Gene_Symbol=LDHA Isoform 1 of L-lactate dehydrogenase A chain	P00338		2		1			YES
ab16moc_897	YES	YES	Ldhb	MGI:96763	LDHB	HGNC:6541	ENSMUSG00000030246	ENSG00000111716	16832	3945	Cluster 253	Ldhb	LDHB	IPI00229510	IPI:IPI00229510.5|SWISS-PROT:P16125|TREMBL:Q5M8R7|ENSEMBL:ENSMUSP00000032373|REFSEQ:NP_032518|VEGA:OTTMUSP00000017612 Tax_Id=10090 Gene_Symbol=Ldhb L-lactate dehydrogenase B chain	P16125	IPI00219217	IPI:IPI00219217.3|SWISS-PROT:P07195|TREMBL:Q5U077|ENSEMBL:ENSP00000229319|REFSEQ:NP_002291|H-INV:HIT000037014|VEGA:OTTHUMP00000082412;OTTHUMP00000082413;OTTHUMP00000165228;OTTHUMP00000165229;OTTHUMP00000166897 Tax_Id=9606 Gene_Symbol=LDHB L-lactate dehydr	P07195		4	3	4			YES
ab16moc_1283	YES	YES	Lancl1	MGI:1336997	LANCL1	HGNC:6508	ENSMUSG00000026000	ENSG00000115365	14768	10314	Cluster 1397	Lancl1	LANCL1	IPI00131535	IPI:IPI00131535.1|SWISS-PROT:O89112|TREMBL:Q8CHW0|ENSEMBL:ENSMUSP00000027149|REFSEQ:NP_067270|VEGA:OTTMUSP00000024065;OTTMUSP00000024066 Tax_Id=10090 Gene_Symbol=Lancl1 LanC-like protein 1	O89112	IPI00005724	IPI:IPI00005724.1|SWISS-PROT:O43813|TREMBL:Q53TN2;Q6FHH6|ENSEMBL:ENSP00000233714|REFSEQ:NP_006046|H-INV:HIT000325654|VEGA:OTTHUMP00000163940 Tax_Id=9606 Gene_Symbol=LANCL1 LanC-like protein 1	O43813		2			1
ab16moc_1278	YES	YES	Lancl2	MGI:1919085	LANCL2	HGNC:6509	ENSMUSG00000062190	ENSG00000132434	71835	55915	Cluster 1674	Lancl2	LANCL2	IPI00121949	IPI:IPI00121949.1|SWISS-PROT:Q9JJK2|ENSEMBL:ENSMUSP00000052146;ENSMUSP00000072723|REFSEQ:NP_598498 Tax_Id=10090 Gene_Symbol=Lancl2 LanC-like protein 2	Q9JJK2	IPI00032995	IPI:IPI00032995.1|SWISS-PROT:Q9NS86|TREMBL:Q6NSL4|ENSEMBL:ENSP00000254770|REFSEQ:NP_061167|H-INV:HIT000246431|VEGA:OTTHUMP00000025397;OTTHUMP00000065384;OTTHUMP00000159664 Tax_Id=9606 Gene_Symbol=LANCL2 LanC-like protein 2	Q9NS86		2	2		1		YES
ab16moc_449	YES	YES	Lphn1	MGI:1929461	LPHN1	HGNC:20973	ENSMUSG00000013033	ENSG00000072071	330814	22859	Cluster 1666	Lphn1	LPHN1	IPI00816879	IPI:IPI00816879.1|SWISS-PROT:Q80TR1-1 Tax_Id=10090 Gene_Symbol=Lphn1 Isoform 1 of Latrophilin-1 precursor	Q80TR1	IPI00183445	IPI:IPI00183445.1|SWISS-PROT:O94910-1|ENSEMBL:ENSP00000340688|REFSEQ:NP_001008701|H-INV:HIT000000538|VEGA:OTTHUMP00000077481 Tax_Id=9606 Gene_Symbol=LPHN1 Isoform 1 of Latrophilin-1 precursor	O94910		11	10	7	6	YES	YES
ab16moc_456	YES	YES	Lphn3	MGI:2441950	LPHN3	HGNC:20974	ENSMUSG00000037605	ENSG00000150471	319387	23284	Cluster 1580	Lphn3	LPHN3	IPI00411158	IPI:IPI00411158.2|SWISS-PROT:Q80TS3-2 Tax_Id=10090 Gene_Symbol=Lphn3 Isoform 2 of Latrophilin-3 precursor	Q80TS3	IPI00162547	IPI:IPI00162547.2|SWISS-PROT:Q9HAR2-2|ENSEMBL:ENSP00000280009|REFSEQ:NP_056051|H-INV:HIT000076893|VEGA:OTTHUMP00000063154 Tax_Id=9606 Gene_Symbol=LPHN3 Isoform 2 of Latrophilin-3 precursor	Q9HAR2		11	9	6	8	YES
ab16moc_1254	YES	YES	Llgl1	MGI:102682	LLGL1	HGNC:6628	ENSMUSG00000020536	ENSG00000131899	16897	3996	Cluster 1640	Llgl1	LLGL1	IPI00649658	IPI:IPI00649658.1|SWISS-PROT:Q80Y17|TREMBL:Q80VF1;Q8BNH9;Q9JJ27|REFSEQ:NP_032528|VEGA:OTTMUSP00000008174 Tax_Id=10090 Gene_Symbol=Llgl1 Lethal(2) giant larvae protein homolog 1	Q80Y17	IPI00105532	IPI:IPI00105532.3|SWISS-PROT:Q15334|ENSEMBL:ENSP00000321537|REFSEQ:NP_004131|H-INV:HIT000101574|VEGA:OTTHUMP00000065700;OTTHUMP00000182937 Tax_Id=9606 Gene_Symbol=LLGL1 lethal giant larvae homolog 1	Q15334		2	2	2	1		YES
ab16moc_475	YES	YES	Letm1	MGI:1932557	LETM1	HGNC:6556	ENSMUSG00000005299	ENSG00000168924	56384	3954	Cluster 881	Letm1	LETM1	IPI00131177	IPI:IPI00131177.1|SWISS-PROT:Q9Z2I0|ENSEMBL:ENSMUSP00000005431|REFSEQ:NP_062668|VEGA:OTTMUSP00000023966 Tax_Id=10090 Gene_Symbol=Letm1 Leucine zipper-EF-hand-containing transmembrane protein 1, mitochondrial precursor	Q9Z2I0	IPI00017592	IPI:IPI00017592.1|SWISS-PROT:O95202|ENSEMBL:ENSP00000305653;ENSP00000354784|REFSEQ:NP_036450|H-INV:HIT000064944|VEGA:OTTHUMP00000149960 Tax_Id=9606 Gene_Symbol=LETM1 Leucine zipper-EF-hand-containing transmembrane protein 1, mitochondrial precursor	O95202		10	9	4	5	YES
ab16moc_523	YES	YES	Lrrc59	MGI:2138133	LRRC59	HGNC:28817	ENSMUSG00000020869	ENSG00000108829	98238	55379	Cluster 416	Lrrc59	LRRC59	IPI00123281	IPI:IPI00123281.1|SWISS-PROT:Q922Q8|TREMBL:Q3UBL0|ENSEMBL:ENSMUSP00000021239|REFSEQ:NP_598568|VEGA:OTTMUSP00000001956 Tax_Id=10090 Gene_Symbol=Lrrc59 Leucine-rich repeat-containing protein 59	Q922Q8	IPI00396321	IPI:IPI00396321.1|SWISS-PROT:Q96AG4|ENSEMBL:ENSP00000225972|REFSEQ:NP_060979|H-INV:HIT000008602|VEGA:OTTHUMP00000095790;OTTHUMP00000182021 Tax_Id=9606 Gene_Symbol=LRRC59 Leucine-rich repeat-containing protein 59	Q96AG4		9	5	7	7	YES
ab16moc_1339	YES	YES	Lrrc57	MGI:1913856	LRRC57	HGNC:26719	ENSMUSG00000027286	ENSG00000180979	66606	255252	Cluster 1594	Lrrc57	LRRC57	IPI00623216	IPI:IPI00623216.1|SWISS-PROT:Q9D1G5|TREMBL:Q8JZX5|ENSEMBL:ENSMUSP00000087465;ENSMUSP00000099554;ENSMUSP00000099555;ENSMUSP00000099556;ENSMUSP00000099557|REFSEQ:NP_079933|VEGA:OTTMUSP00000016642;OTTMUSP00000016643;OTTMUSP00000016644;OTTMUSP00000016645 Tax_	Q9D1G5	IPI00470576	IPI:IPI00470576.4|SWISS-PROT:Q8N9N7|ENSEMBL:ENSP00000326817|REFSEQ:NP_694992|H-INV:HIT000306263|VEGA:OTTHUMP00000161266;OTTHUMP00000176219;OTTHUMP00000176220 Tax_Id=9606 Gene_Symbol=LRRC57 Leucine-rich repeat-containing protein 57	Q8N9N7		2	2	1	1
ab16moc_17	YES	YES	Lrrc7	MGI:2676665	LRRC7	HGNC:18531	ENSMUSG00000028176	ENSG00000033122	242274	57554	Cluster 161	Lrrc7	LRRC7	IPI00330144	IPI:IPI00330144.5|SWISS-PROT:Q80TE7|TREMBL:Q3URB9|ENSEMBL:ENSMUSP00000029826|REFSEQ:XP_143575;XP_998825 Tax_Id=10090 Gene_Symbol=Lrrc7 similar to Leucine-rich repeat-containing protein 7 (LAP1 protein) (Densin-180) isoform 1	Q80TE7	IPI00426269	IPI:IPI00426269.2|SWISS-PROT:Q96NW7-2|ENSEMBL:ENSP00000309245;ENSP00000359996|VEGA:OTTHUMP00000065337;OTTHUMP00000065341 Tax_Id=9606 Gene_Symbol=LRRC7 Isoform 2 of Leucine-rich repeat-containing protein 7	Q96NW7		71	56	50	59	YES	YES
ab16moc_648	YES	YES	Erbb2ip	MGI:1890169	ERBB2IP	HGNC:15842	ENSMUSG00000021709	ENSG00000112851	59079	55914	Cluster 1938	Erbb2ip	ERBB2IP	IPI00454041	IPI:IPI00454041.1|SWISS-PROT:Q80TH2-3|ENSEMBL:ENSMUSP00000088813 Tax_Id=10090 Gene_Symbol=Erbb2ip Isoform 3 of Protein LAP2	Q80TH2	IPI00438291	IPI:IPI00438291.2|SWISS-PROT:Q96RT1-6|ENSEMBL:ENSP00000370323 Tax_Id=9606 Gene_Symbol=ERBB2IP Isoform 6 of Protein LAP2	Q96RT1		7	6	4	6	YES
ab16moc_441	YES	YES	Lrrc8a	MGI:2652847	LRRC8A	HGNC:19027	ENSMUSG00000007476	ENSG00000136802	241296	56262	Cluster 1051	Lrrc8a	LRRC8A	IPI00126759	IPI:IPI00126759.6|SWISS-PROT:Q80WG5|TREMBL:A2AQZ0|ENSEMBL:ENSMUSP00000007620;ENSMUSP00000092690|REFSEQ:NP_808393|VEGA:OTTMUSP00000018164;OTTMUSP00000018165 Tax_Id=10090 Gene_Symbol=Phyhd1;Lrrc8a Leucine-rich repeat-containing protein 8A	Q80WG5	IPI00002070	IPI:IPI00002070.6|SWISS-PROT:Q8IWT6|TREMBL:Q96SW8;Q9NW37|ENSEMBL:ENSP00000259324;ENSP00000361680;ENSP00000361682|REFSEQ:NP_062540|H-INV:HIT000053623|VEGA:OTTHUMP00000022308;OTTHUMP00000022309;OTTHUMP00000064501 Tax_Id=9606 Gene_Symbol=LRRC8A Leucine-rich	Q8IWT6		11	4	7	8	YES
ab16moc_794	YES	YES	Lasp1	MGI:109656	LASP1	HGNC:6513	ENSMUSG00000038366	ENSG00000002834	16796	3927	Cluster 197	Lasp1	LASP1	IPI00648086	IPI:IPI00648086.1|TREMBL:A2A6G9|VEGA:OTTMUSP00000002667 Tax_Id=10090 Gene_Symbol=Lasp1 LIM and SH3 protein 1	A2A6G9	IPI00000861	IPI:IPI00000861.1|SWISS-PROT:Q14847-1|ENSEMBL:ENSP00000325240|REFSEQ:NP_006139|H-INV:HIT000323920|VEGA:OTTHUMP00000096263;OTTHUMP00000164238;OTTHUMP00000181138 Tax_Id=9606 Gene_Symbol=LASP1 Isoform 1 of LIM and SH3 domain protein 1	Q14847		5	5	4	3	YES
ab16moc_318	YES	YES	Lsamp	MGI:1261760	LSAMP	HGNC:6705	ENSMUSG00000061080	ENSG00000185565	268890	4045	Cluster 178	Lsamp	LSAMP	IPI00652675	IPI:IPI00652675.2|TREMBL:Q3TYE5|ENSEMBL:ENSMUSP00000097349|VEGA:OTTMUSP00000018462 Tax_Id=10090 Gene_Symbol=Lsamp Visual cortex cDNA, RIKEN full-length enriched library, clone:K230301B18 product:limbic system-associated membrane protein, full insert seque	Q3TYE5	IPI00013303	IPI:IPI00013303.2|SWISS-PROT:Q13449|ENSEMBL:ENSP00000328455|REFSEQ:NP_002329|H-INV:HIT000051144|VEGA:OTTHUMP00000068511;OTTHUMP00000172325 Tax_Id=9606 Gene_Symbol=LSAMP Limbic system-associated membrane protein precursor	Q13449		15	15	11	12	YES	YES
ab16moc_571	YES	YES	Lin7c	MGI:1330839	LIN7C	HGNC:17789	ENSMUSG00000027162	ENSG00000148943	22343	55327	Cluster 282	Lin7c	LIN7C	IPI00136498	IPI:IPI00136498.1|SWISS-PROT:O88952|TREMBL:A2ARI2;Q3TS99;Q3TTY6;Q3UX93|ENSEMBL:ENSMUSP00000028583|REFSEQ:NP_035829|VEGA:OTTMUSP00000016097 Tax_Id=10090 Gene_Symbol=Lin7c Lin-7 homolog C	O88952	IPI00019997	IPI:IPI00019997.1|SWISS-PROT:Q9NUP9|TREMBL:Q53FX5|ENSEMBL:ENSP00000278193|REFSEQ:NP_060832|H-INV:HIT000054025 Tax_Id=9606 Gene_Symbol=LIN7C Lin-7 homolog C	Q9NUP9		8	5	7	8	YES	YES
ab16moc_935	YES	YES	Lin7b	MGI:1330858	LIN7B	HGNC:17788	ENSMUSG00000003872	ENSG00000104863	22342	64130	Cluster 635	Lin7b	LIN7B	IPI00136496	IPI:IPI00136496.1|SWISS-PROT:O88951|ENSEMBL:ENSMUSP00000003971|REFSEQ:NP_035828|VEGA:OTTMUSP00000017799 Tax_Id=10090 Gene_Symbol=Lin7b Lin-7 homolog B	O88951	IPI00005566	IPI:IPI00005566.1|SWISS-PROT:Q9HAP6|ENSEMBL:ENSP00000221459|REFSEQ:NP_071448|H-INV:HIT000252788|VEGA:OTTHUMP00000069275;OTTHUMP00000077215;OTTHUMP00000165836 Tax_Id=9606 Gene_Symbol=LIN7B Lin-7 homolog B	Q9HAP6		4	4	4	3	YES	YES
ab16moc_952	YES	YES	Lin7a	MGI:2135609	LIN7A	HGNC:17787	ENSMUSG00000019906	ENSG00000111052	108030	8825	Cluster 747	Lin7a	LIN7A	IPI00344142	IPI:IPI00344142.4|SWISS-PROT:Q8JZS0|ENSEMBL:ENSMUSP00000020057|REFSEQ:NP_001034443 Tax_Id=10090 Gene_Symbol=Lin7a Lin-7 homolog A	Q8JZS0	IPI00005824	IPI:IPI00005824.1|SWISS-PROT:O14910|TREMBL:A4FTY3|ENSEMBL:ENSP00000261203|REFSEQ:NP_004655|H-INV:HIT000072449|VEGA:OTTHUMP00000168620 Tax_Id=9606 Gene_Symbol=LIN7A Lin-7 homolog A	O14910		4	2	4	2	YES
ab16moc_512	YES	YES	Ppfia1	MGI:1924750	PPFIA1	HGNC:9245	ENSMUSG00000037519	ENSG00000131626	233977	8500	Cluster 1312	Ppfia1	PPFIA1	IPI00674306	IPI:IPI00674306.3|ENSEMBL:ENSMUSP00000091499|REFSEQ:XP_133979;XP_923336;XP_999181 Tax_Id=10090 Gene_Symbol=Ppfia1 protein tyrosine phosphatase, receptor type, f polypeptide (PTPRF), interacting protein, alpha 1 isoform 1	Q3UJC0	IPI00784296	IPI:IPI00784296.1|SWISS-PROT:Q13136-1|TREMBL:Q59FZ5|ENSEMBL:ENSP00000374200;ENSP00000374202|REFSEQ:NP_003617|H-INV:HIT000218692 Tax_Id=9606 Gene_Symbol=PPFIA1 Isoform 1 of Liprin-alpha-1	Q13136		9	8	6	5	YES	YES
ab16moc_83	YES	YES	Ppfia2	MGI:2443834	PPFIA2	HGNC:9246	ENSMUSG00000053825	ENSG00000139220	327814	8499	Cluster 393	Ppfia2	PPFIA2	IPI00224775	IPI:IPI00224775.2|SWISS-PROT:Q8BSS9 Tax_Id=10090 Gene_Symbol=Ppfia2 Liprin-alpha-2	Q8BSS9	IPI00719091	IPI:IPI00719091.1|TREMBL:Q2M3G8|VEGA:OTTHUMP00000168623 Tax_Id=9606 Gene_Symbol=PPFIA2 PPFIA2 protein	Q2M3G8		37	34	24	20	YES	YES
ab16moc_185	YES	YES	Ppfia3	MGI:1924037	PPFIA3	HGNC:9247	ENSMUSG00000003863	ENSG00000177380	76787	8541	Cluster 749	Ppfia3	PPFIA3	IPI00757782	IPI:IPI00757782.1|REFSEQ:XP_001002337 Tax_Id=10090 Gene_Symbol=2410127E16Rik similar to Liprin-alpha-3	P60469	IPI00398364	IPI:IPI00398364.3|SWISS-PROT:O75145-1|TREMBL:Q3MJA0|ENSEMBL:ENSP00000335614|REFSEQ:NP_003651|H-INV:HIT000000379|VEGA:OTTHUMP00000069890;OTTHUMP00000077846 Tax_Id=9606 Gene_Symbol=PPFIA3 Isoform 1 of Liprin-alpha-3	O75145		23	15	11	14	YES	YES
ab16moc_316	YES	YES	Ppfia4	MGI:1915757	PPFIA4	HGNC:9248	ENSMUSG00000026458	ENSG00000143847	68507	8497	Cluster 887	PPFIA4	PPFIA4	IPI00470177	IPI:IPI00470177.4|TREMBL:Q69ZW5|ENSEMBL:ENSMUSP00000027729|REFSEQ:XP_129443;XP_993485 Tax_Id=10090 Gene_Symbol=Ppfia4 similar to Liprin-alpha-4 (Protein tyrosine phosphatase receptor type f polypeptide-interacting protein alpha-4) (PTPRF-interacting prote	Q69ZW5	IPI00397578	IPI:IPI00397578.2|TREMBL:Q5VV84|ENSEMBL:ENSP00000356207;ENSP00000356209|VEGA:OTTHUMP00000039088;OTTHUMP00000060937 Tax_Id=9606 Gene_Symbol=PPFIA4 Protein tyrosine phosphatase, receptor type, f polypeptide (PTPRF), interacting protein (Liprin), alpha 4	Q5VV84		15	13	9	7	YES	YES
ab16moc_642	YES	YES	Ppap2b	MGI:1915166	PPAP2B	HGNC:9229	ENSMUSG00000028517	ENSG00000162407	67916	8613	Cluster 522	Ppap2b	PPAP2B	IPI00115626	IPI:IPI00115626.1|SWISS-PROT:Q99JY8|TREMBL:A2A9C0|ENSEMBL:ENSMUSP00000065719|REFSEQ:NP_542122|VEGA:OTTMUSP00000008487 Tax_Id=10090 Gene_Symbol=Ppap2b Lipid phosphate phosphohydrolase 3	Q99JY8	IPI00021453	IPI:IPI00021453.1|SWISS-PROT:O14495|TREMBL:Q5U0F7|ENSEMBL:ENSP00000294390;ENSP00000360296|REFSEQ:NP_003704;NP_803133|H-INV:HIT000080457|VEGA:OTTHUMP00000009855;OTTHUMP00000046813 Tax_Id=9606 Gene_Symbol=PPAP2B Lipid phosphate phosphohydrolase 3	O14495		7	6	5	5	YES
ab16moc_1293	YES	YES	Lynx1	MGI:1345180	LYNX1	HGNC:29604	ENSMUSG00000022594	ENSG00000180155	23936	66004	Cluster 441	Lynx1	LYNX1	IPI00125830	IPI:IPI00125830.1|SWISS-PROT:Q9WVC2|ENSEMBL:ENSMUSP00000023259|REFSEQ:NP_035968 Tax_Id=10090 Gene_Symbol=Lynx1 Ly-6/neurotoxin-like protein 1 precursor	Q9WVC2	IPI00289058	IPI:IPI00289058.3|SWISS-PROT:Q9BZG9|ENSEMBL:ENSP00000337950|REFSEQ:NP_803252;NP_803429;NP_803430|VEGA:OTTHUMP00000178330;OTTHUMP00000178331;OTTHUMP00000178332 Tax_Id=9606 Gene_Symbol=LYNX1 Ly-6/neurotoxin-like protein 1 precursor	Q9BZG9		2		1	2		YES
ab16moc_1111	YES	YES	Kars	MGI:1934754	KARS	HGNC:6215	ENSMUSG00000031948	ENSG00000065427	85305	3735	Cluster 2095	Kars	KARS	IPI00620145	IPI:IPI00620145.1|SWISS-PROT:Q99MN1|TREMBL:Q3TIV6;Q8C1V4;Q8C292|ENSEMBL:ENSMUSP00000034426|REFSEQ:NP_444322 Tax_Id=10090 Gene_Symbol=Kars Lysyl-tRNA synthetase	Q99MN1	IPI00014238	IPI:IPI00014238.2|SWISS-PROT:Q15046|ENSEMBL:ENSP00000303043|REFSEQ:NP_005539|H-INV:HIT000101392|VEGA:OTTHUMP00000080847;OTTHUMP00000174948 Tax_Id=9606 Gene_Symbol=KARS Lysyl-tRNA synthetase	Q15046		3	3
ab16moc_238	YES	YES	Cask	MGI:1309489	CASK	HGNC:1497	ENSMUSG00000031012	ENSG00000147044	12361	8573	Cluster 647	Cask	CASK	IPI00844763	IPI:IPI00844763.1|SWISS-PROT:O70589-1 Tax_Id=10090 Gene_Symbol=Cask Isoform 1 of Peripheral plasma membrane protein CASK	O70589	IPI00514301	IPI:IPI00514301.3|SWISS-PROT:O14936-1|ENSEMBL:ENSP00000322727;ENSP00000367405|VEGA:OTTHUMP00000023154;OTTHUMP00000023162 Tax_Id=9606 Gene_Symbol=CASK Isoform 1 of Peripheral plasma membrane protein CASK	O14936		19	9	11	12	YES	YES
ab16moc_415	YES	YES	Mpp2	MGI:1858257	MPP2	HGNC:7220	ENSMUSG00000017314	ENSG00000108852	50997	4355	Cluster 644	Mpp2	MPP2	IPI00125147	IPI:IPI00125147.4|SWISS-PROT:Q9WV34-1|TREMBL:A2A508|ENSEMBL:ENSMUSP00000017458|REFSEQ:NP_057904|VEGA:OTTMUSP00000002219 Tax_Id=10090 Gene_Symbol=Mpp2 Isoform 1 of MAGUK p55 subfamily member 2	Q9WV34	IPI00793074	IPI:IPI00793074.1|SWISS-PROT:Q14168-1|ENSEMBL:ENSP00000225995|VEGA:OTTHUMP00000181842 Tax_Id=9606 Gene_Symbol=MPP2 Isoform 1 of MAGUK p55 subfamily member 2	Q14168		12	9	9	9	YES	YES
ab16moc_583	YES	YES	Mpp6	MGI:1927340	MPP6	HGNC:18167	ENSMUSG00000038388	ENSG00000105926	56524	51678	Cluster 1024	Mpp6	MPP6	IPI00124046	IPI:IPI00124046.1|SWISS-PROT:Q9JLB0-1|TREMBL:Q3TPA2;Q3UN60|ENSEMBL:ENSMUSP00000038772 Tax_Id=10090 Gene_Symbol=Mpp6 Isoform Beta of MAGUK p55 subfamily member 6	Q9JLB0	IPI00303280	IPI:IPI00303280.4|SWISS-PROT:Q9NZW5|TREMBL:A4D157|ENSEMBL:ENSP00000222644|REFSEQ:NP_057531|H-INV:HIT000025432|VEGA:OTTHUMP00000025125;OTTHUMP00000041324;OTTHUMP00000041326;OTTHUMP00000158586 Tax_Id=9606 Gene_Symbol=MPP6 MAGUK p55 subfamily member 6	Q9NZW5		8	5	6	6	YES
ab16moc_429	YES	YES	Mdh2	MGI:97050	MDH2	HGNC:6971	ENSMUSG00000019179	ENSG00000146701	17448	4191	Cluster 203	Mdh2	MDH2	IPI00323592	IPI:IPI00323592.2|SWISS-PROT:P08249|ENSEMBL:ENSMUSP00000019323|REFSEQ:NP_032643 Tax_Id=10090 Gene_Symbol=Mdh2 Malate dehydrogenase, mitochondrial precursor	P08249	IPI00291006	IPI:IPI00291006.1|SWISS-PROT:P40926|TREMBL:Q0QF37;Q6FHZ0;Q75MP7;Q75MT9|ENSEMBL:ENSP00000327070|REFSEQ:NP_005909|H-INV:HIT000271965|VEGA:OTTHUMP00000025445;OTTHUMP00000161017 Tax_Id=9606 Gene_Symbol=MDH2 Malate dehydrogenase, mitochondrial precursor	P40926		11	7	10	8	YES	YES
ab16moc_1279	YES	YES	Magi2	MGI:1354953	MAGI2	HGNC:18957	ENSMUSG00000040003	ENSG00000187391	50791	9863	Cluster 2607	Magi2	MAGI2	IPI00378020	IPI:IPI00378020.2|SWISS-PROT:Q9WVQ1-4|REFSEQ:XP_001000904 Tax_Id=10090 Gene_Symbol=Magi2 Isoform 4 of Membrane-associated guanylate kinase, WW and PDZ domain-containing protein 2	Q9WVQ1	IPI00248069	IPI:IPI00248069.6|SWISS-PROT:Q86UL8-1|TREMBL:A4D1C1|ENSEMBL:ENSP00000346151|REFSEQ:NP_036433|H-INV:HIT000063439|VEGA:OTTHUMP00000025135;OTTHUMP00000161290 Tax_Id=9606 Gene_Symbol=MAGI2 Isoform 1 of Membrane-associated guanylate kinase, WW and PDZ domain-c	Q86UL8		2	1	1	2
ab16moc_634	YES	YES	Mtx1	MGI:103025	MTX1	HGNC:7504	ENSMUSG00000064068	ENSG00000173171	17827	4580	Cluster 721	Mtx1	MTX1	IPI00112327	IPI:IPI00112327.1|SWISS-PROT:P47802|TREMBL:Q8R5C0|ENSEMBL:ENSMUSP00000073261|REFSEQ:NP_038632 Tax_Id=10090 Gene_Symbol=Mtx1 Metaxin-1	P47802	IPI00013678	IPI:IPI00013678.2|SWISS-PROT:Q13505|TREMBL:Q4VX25|ENSEMBL:ENSP00000357360|REFSEQ:NP_002446|H-INV:HIT000285177|VEGA:OTTHUMP00000033824;OTTHUMP00000060015 Tax_Id=9606 Gene_Symbol=MTX1 metaxin 1 isoform 1	Q13505		7	5	6	3	YES
ab16moc_36	YES	YES	Mtap1a	MGI:1306776	MAP1A	HGNC:6835	ENSMUSG00000027254	ENSG00000166963	17754	4130	Cluster 577	Mtap1a	MAP1A	IPI00676243	IPI:IPI00676243.2|SWISS-PROT:Q9QYR6-2|TREMBL:A2ARP8|ENSEMBL:ENSMUSP00000092223|REFSEQ:NP_115769|VEGA:OTTMUSP00000016203 Tax_Id=10090 Gene_Symbol=Mtap1a Microtubule-associated protein 1 A	Q9QYR6	IPI00789977	IPI:IPI00789977.1|SWISS-PROT:P78559|TREMBL:Q504X9;Q7Z5F9;Q9UL09|ENSEMBL:ENSP00000300231|REFSEQ:NP_002364|H-INV:HIT000273429|VEGA:OTTHUMP00000175706 Tax_Id=9606 Gene_Symbol=MAP1A Microtubule-associated protein 1A	P78559		56	50	31	37	YES	YES
ab16moc_39	YES	YES	Mtap1b	MGI:1306778	MAP1B	HGNC:6836	ENSMUSG00000052727	ENSG00000131711	17755	4131	Cluster 471	Mtap1b	MTAP1B	IPI00130920	IPI:IPI00130920.1|SWISS-PROT:P14873|TREMBL:A0PJ96;Q3TYV8;Q3TZM8;Q3UF78;Q3UPV4;Q8CAI9;Q8CFR9|ENSEMBL:ENSMUSP00000068374|REFSEQ:NP_032660 Tax_Id=10090 Gene_Symbol=Mtap1b Microtubule-associated protein 1B	P14873	IPI00008868	IPI:IPI00008868.3|SWISS-PROT:P46821|TREMBL:A2BDK5;Q05BW8;Q32NB7;Q6PJD3;Q86X89|ENSEMBL:ENSP00000296755;ENSP00000370035|REFSEQ:NP_005900|VEGA:OTTHUMP00000126944 Tax_Id=9606 Gene_Symbol=MAP1B Microtubule-associated protein 1B	P46821		53	45	43	42	YES	YES
ab16moc_22	YES	YES	Mtap2	MGI:97175	MAP2	HGNC:6839	ENSMUSG00000015222	ENSG00000078018	17756	4133	Cluster 335	Mtap2	MAP2	IPI00118075	IPI:IPI00118075.1|SWISS-PROT:P20357|TREMBL:Q3URJ7|ENSEMBL:ENSMUSP00000024639|VEGA:OTTMUSP00000017690 Tax_Id=10090 Gene_Symbol=Mtap2 Microtubule-associated protein 2	P20357	IPI00472094	IPI:IPI00472094.1|SWISS-PROT:P11137-3 Tax_Id=9606 Gene_Symbol=MAP2 Isoform 3 of Microtubule-associated protein 2	P11137		67	48	40	42	YES	YES
ab16moc_501	YES	YES	Mtap4	MGI:97178	MAP4	HGNC:6862	ENSMUSG00000047011	ENSG00000047849	17758	4134	Cluster 1548	Mtap4	MAP4	IPI00408119	IPI:IPI00408119.5|SWISS-PROT:P27546|TREMBL:Q05BJ2;Q7TPD4|ENSEMBL:ENSMUSP00000035055|REFSEQ:NP_032659 Tax_Id=10090 Gene_Symbol=Mtap4 Microtubule-associated protein 4	P27546	IPI00396171	IPI:IPI00396171.3|SWISS-PROT:P27816-1|TREMBL:Q05D06;Q6NX68|ENSEMBL:ENSP00000353375|REFSEQ:NP_002366|H-INV:HIT000218525 Tax_Id=9606 Gene_Symbol=MAP4 Isoform 1 of Microtubule-associated protein 4	P27816		9	7	6	8	YES	YES
ab16moc_772	YES	YES	Mapre3	MGI:2140967	MAPRE3	HGNC:6892	ENSMUSG00000029166	ENSG00000084764	100732	22924	Cluster 539	Mapre3	MAPRE3	IPI00343557	IPI:IPI00343557.1|SWISS-PROT:Q6PER3|TREMBL:Q2UZW7|ENSEMBL:ENSMUSP00000031058|REFSEQ:NP_579928|VEGA:OTTMUSP00000025251 Tax_Id=10090 Gene_Symbol=Mapre3 Microtubule-associated protein RP/EB family member 3	Q6PER3	IPI00017597	IPI:IPI00017597.3|SWISS-PROT:Q9UPY8-1|TREMBL:Q6FHB0|ENSEMBL:ENSP00000233121;ENSP00000369760|REFSEQ:NP_036458|H-INV:HIT000058812|VEGA:OTTHUMP00000122582 Tax_Id=9606 Gene_Symbol=MAPRE3 Isoform 1 of Microtubule-associated protein RP/EB family member 3	Q9UPY8		5	4	4	2	YES	YES
ab16moc_237	YES	YES	Mapt	MGI:97180	MAPT	HGNC:6893	ENSMUSG00000018411	ENSG00000186868	17762	4137	Cluster 99	Mapt	MAPT	IPI00465469	IPI:IPI00465469.5|SWISS-PROT:P10637-2|TREMBL:A2A5Y7;Q3UH19|ENSEMBL:ENSMUSP00000097919|REFSEQ:NP_001033698|VEGA:OTTMUSP00000003083 Tax_Id=10090 Gene_Symbol=Mapt Isoform Tau-A of Microtubule-associated protein tau	P10637	IPI00220175	IPI:IPI00220175.5|SWISS-PROT:P10636-7|TREMBL:Q5XWF0|ENSEMBL:ENSP00000340438 Tax_Id=9606 Gene_Symbol=MAPT Isoform Tau-E of Microtubule-associated protein tau	P10636		19	12	14	16	YES	YES
ab16moc_1073	YES	YES	Map1lc3a	MGI:1915661	MAP1LC3A	HGNC:6838	ENSMUSG00000027602	ENSG00000101460	66734	84557	Cluster 376	Map1lc3a	MAP1LC3A	IPI00137594	IPI:IPI00137594.2|SWISS-PROT:Q91VR7|TREMBL:A2AVS1|ENSEMBL:ENSMUSP00000029128|REFSEQ:NP_080011|VEGA:OTTMUSP00000017090 Tax_Id=10090 Gene_Symbol=Map1lc3a Microtubule-associated proteins 1A/1B light chain 3A precursor	Q91VR7	IPI00415014	IPI:IPI00415014.3|SWISS-PROT:Q9H492-1|ENSEMBL:ENSP00000353886|REFSEQ:NP_115903|H-INV:HIT000276209|VEGA:OTTHUMP00000030697 Tax_Id=9606 Gene_Symbol=MAP1LC3A Isoform 1 of Microtubule-associated proteins 1A/1B light chain 3A precursor	Q9H492		3	3	2	3	YES	YES
ab16moc_1123	YES	YES	Mtch1	MGI:1929261	MTCH1	HGNC:17586	ENSMUSG00000024012	ENSG00000137409	56462	23787	Cluster 1280	Mtch1	MTCH1	IPI00137173	IPI:IPI00137173.1|SWISS-PROT:Q791T5-1|ENSEMBL:ENSMUSP00000093077|REFSEQ:NP_063933 Tax_Id=10090 Gene_Symbol=Mtch1 Isoform 1 of Mitochondrial carrier homolog 1	Q791T5	IPI00479697	IPI:IPI00479697.1|SWISS-PROT:Q9NZJ7-2|TREMBL:A4FVA6|ENSEMBL:ENSP00000362718|REFSEQ:NP_055156|VEGA:OTTHUMP00000016300;OTTHUMP00000016315 Tax_Id=9606 Gene_Symbol=MTCH1 Isoform 2 of Mitochondrial carrier homolog 1	Q9NZJ7		3	2	2	1
ab16moc_690	YES	YES	Mtch2	MGI:1929260	MTCH2	HGNC:17587	ENSMUSG00000027282	ENSG00000109919	56428	23788	Cluster 559	Mtch2	MTCH2	IPI00132039	IPI:IPI00132039.2|SWISS-PROT:Q791V5|TREMBL:A2AFW7|ENSEMBL:ENSMUSP00000061152|REFSEQ:NP_062732|VEGA:OTTMUSP00000015114 Tax_Id=10090 Gene_Symbol=Mtch2 Mitochondrial carrier homolog 2	Q791V5	IPI00003833	IPI:IPI00003833.3|SWISS-PROT:Q9Y6C9|TREMBL:Q53G34|ENSEMBL:ENSP00000303222|REFSEQ:NP_055157|H-INV:HIT000253434|VEGA:OTTHUMP00000081799 Tax_Id=9606 Gene_Symbol=MTCH2 Mitochondrial carrier homolog 2	Q9Y6C9		6	6	5	4	YES	YES
ab16moc_269	YES	YES	Tomm70a	MGI:106295	TOMM70A	HGNC:11985	ENSMUSG00000022752	ENSG00000154174	28185	9868	Cluster 440	Tomm70a	TOMM70A	IPI00751137	IPI:IPI00751137.1|TREMBL:Q3TSX8;Q80TT4;Q8BNI6|ENSEMBL:ENSMUSP00000023433|REFSEQ:NP_613065 Tax_Id=10090 Gene_Symbol=Tomm70a Adult male thymus cDNA, RIKEN full-length enriched library, clone:5830412L10 product:Mitochondrial proteins import receptor (Translo	Q3TSX8	IPI00015602	IPI:IPI00015602.1|SWISS-PROT:O94826|TREMBL:Q6P0M2|ENSEMBL:ENSP00000284320|REFSEQ:NP_055635|H-INV:HIT000000444|VEGA:OTTHUMP00000172059 Tax_Id=9606 Gene_Symbol=TOMM70A Mitochondrial precursor proteins import receptor	O94826		17	15	8	10	YES	YES
ab16moc_289	YES	YES	Uqcrc1	MGI:107876	UQCRC1	HGNC:12585	ENSMUSG00000025651	ENSG00000010256	22273	7384	Cluster 313	Uqcrc1	UQCRC1	IPI00111885	IPI:IPI00111885.1|SWISS-PROT:Q9CZ13 Tax_Id=10090 Gene_Symbol=Uqcrc1 Ubiquinol-cytochrome-c reductase complex core protein 1, mitochondrial precursor	Q9CZ13	IPI00013847	IPI:IPI00013847.4|SWISS-PROT:P31930|ENSEMBL:ENSP00000203407|REFSEQ:NP_003356|H-INV:HIT000192292|VEGA:OTTHUMP00000164820;OTTHUMP00000171109;OTTHUMP00000171110 Tax_Id=9606 Gene_Symbol=UQCRC1 Ubiquinol-cytochrome-c reductase complex core protein 1, mitochond	P31930		16	13	12	13	YES	YES
ab16moc_502	YES	YES	Afg3l2	MGI:1916847	AFG3L2	HGNC:315	ENSMUSG00000024527	ENSG00000141385	69597	10939	Cluster 932	Afg3l2	AFG3L2	IPI00170357	IPI:IPI00170357.5|SWISS-PROT:Q8JZQ2|TREMBL:Q3U7C0;Q3UDQ7;Q8R5F1;Q9D736|ENSEMBL:ENSMUSP00000025408|REFSEQ:NP_081406 Tax_Id=10090 Gene_Symbol=Afg3l2 AFG3-like protein 2	Q8JZQ2	IPI00001091	IPI:IPI00001091.4|SWISS-PROT:Q9Y4W6|TREMBL:Q8TA92|ENSEMBL:ENSP00000269143|REFSEQ:NP_006787|H-INV:HIT000326080|VEGA:OTTHUMP00000071704;OTTHUMP00000162476 Tax_Id=9606 Gene_Symbol=AFG3L2 AFG3-like protein 2	Q9Y4W6		9	6	4	7	YES	YES
ab16moc_1060	YES	YES	Mfn2	MGI:2442230	MFN2	HGNC:16877	ENSMUSG00000029020	ENSG00000116688	170731	9927	Cluster 1832	Mfn2	MFN2	IPI00312244	IPI:IPI00312244.3|SWISS-PROT:Q80U63-1|TREMBL:A2A7Y6;Q3TEX7;Q3UGM1|ENSEMBL:ENSMUSP00000030884|REFSEQ:NP_573464|VEGA:OTTMUSP00000011416;OTTMUSP00000011417;OTTMUSP00000011419 Tax_Id=10090 Gene_Symbol=Mfn2 Isoform 1 of Mitofusin-2	Q80U63	IPI00642329	IPI:IPI00642329.2|SWISS-PROT:O95140-1|ENSEMBL:ENSP00000373871;ENSP00000373872|REFSEQ:NP_055689|H-INV:HIT000042368|VEGA:OTTHUMP00000002509;OTTHUMP00000170007 Tax_Id=9606 Gene_Symbol=MFN2 Isoform 1 of Mitofusin-2	O95140		3	3		1
ab16moc_497	YES	YES	Ezr	MGI:98931	EZR	HGNC:12691	ENSMUSG00000052397	ENSG00000092820	22350	7430	Cluster 389	VIL2	VIL2	IPI00330862	IPI:IPI00330862.5|SWISS-PROT:P26040|TREMBL:Q3TCP5;Q3UL48;Q3UXR4;Q4KML7|ENSEMBL:ENSMUSP00000095040|REFSEQ:NP_033536|VEGA:OTTMUSP00000019758 Tax_Id=10090 Gene_Symbol=Vil2 Ezrin	P26040	IPI00843975	IPI:IPI00843975.1|SWISS-PROT:P15311|TREMBL:Q9UJZ2;Q9UJZ6;Q9UJZ7;Q9UJZ8;Q9UK20|ENSEMBL:ENSP00000338934;ENSP00000356042|REFSEQ:NP_003370|H-INV:HIT000026256|VEGA:OTTHUMP00000017506;OTTHUMP00000017507;OTTHUMP00000040092 Tax_Id=9606 Gene_Symbol=VIL2 Ezrin	P15311		9	8	3	6	YES	YES
ab16moc_679	YES	YES	Msn	MGI:97167	MSN	HGNC:7373	ENSMUSG00000031207	ENSG00000147065	17698	4478	Cluster 348	Msn	MSN	IPI00110588	IPI:IPI00110588.4|SWISS-PROT:P26041|TREMBL:A2ALU5;Q05DU4;Q3TZQ2;Q3UF33|ENSEMBL:ENSMUSP00000051217|REFSEQ:NP_034963 Tax_Id=10090 Gene_Symbol=Msn Moesin	P26041	IPI00219365	IPI:IPI00219365.3|SWISS-PROT:P26038|TREMBL:Q6PJT4|ENSEMBL:ENSP00000353408|REFSEQ:NP_002435|H-INV:HIT000037926|VEGA:OTTHUMP00000023438;OTTHUMP00000043724 Tax_Id=9606 Gene_Symbol=MSN Moesin	P26038		6	5	2	4	YES	YES
ab16moc_681	YES	YES	Rdx	MGI:97887	RDX	HGNC:9944	ENSMUSG00000032050	ENSG00000137710	19684	5962	Cluster 478	Rdx	RDX	IPI00308324	IPI:IPI00308324.2|SWISS-PROT:P26043 Tax_Id=10090 Gene_Symbol=Rdx Radixin	P26043	IPI00017367	IPI:IPI00017367.5|SWISS-PROT:P35241|TREMBL:Q05CU6;Q6PKD3;Q9NST9|ENSEMBL:ENSP00000342830|REFSEQ:NP_002897|H-INV:HIT000191480 Tax_Id=9606 Gene_Symbol=RDX Radixin	P35241		6		2
ab16moc_1333	YES	YES	Mthfd1l	MGI:1924836	MTHFD1L	HGNC:21055	ENSMUSG00000040675	ENSG00000120254	270685	25902	Cluster 2805	Mthfd1l	MTHFD1L	IPI00228113	IPI:IPI00228113.4|TREMBL:Q3TVQ0;Q3V3R1;Q3V402;Q80V98;Q8CAL0;Q8K2N5|ENSEMBL:ENSMUSP00000036178|REFSEQ:NP_758512 Tax_Id=10090 Gene_Symbol=Mthfd1l Osteoclast-like cell cDNA, RIKEN full-length enriched library, clone:I420044H02 product:formyltetrahydrofolate	Q3TVQ0	IPI00291646	IPI:IPI00291646.2|TREMBL:Q2TBF3;Q6UB35;Q8WVW0;Q96HG8;Q9H789;Q9UFU8|ENSEMBL:ENSP00000356290|REFSEQ:NP_056255|H-INV:HIT000253337|VEGA:OTTHUMP00000017418 Tax_Id=9606 Gene_Symbol=MTHFD1L methylenetetrahydrofolate dehydrogenase (NADP+ dependent) 1-like	Q2TBF3		2	2		2
ab16moc_310	YES	YES	Bin1	MGI:108092	BIN1	HGNC:1052	ENSMUSG00000024381	ENSG00000136717	30948	274	Cluster 499	Bin1	BIN1	IPI00114352	IPI:IPI00114352.1|SWISS-PROT:O08539-1|ENSEMBL:ENSMUSP00000025239|REFSEQ:NP_033798 Tax_Id=10090 Gene_Symbol=Bin1 Isoform 1 of Myc box-dependent-interacting protein 1	O08539	IPI00186966	IPI:IPI00186966.3|SWISS-PROT:O00499-1|TREMBL:Q659B7|ENSEMBL:ENSP00000316779|REFSEQ:NP_647593|H-INV:HIT000026622|VEGA:OTTHUMP00000162177 Tax_Id=9606 Gene_Symbol=BIN1 Isoform IIA of Myc box-dependent-interacting protein 1	O00499		15	12	7	7	YES	YES
ab16moc_793	YES	YES	Plp1	MGI:97623	PLP1	HGNC:9086	ENSMUSG00000031425	ENSG00000123560	18823	5354	Cluster 760	Plp1	PLP1	IPI00263013	IPI:IPI00263013.4|SWISS-PROT:P60202-1|TREMBL:Q3UYM8|ENSEMBL:ENSMUSP00000033800|REFSEQ:NP_035253|VEGA:OTTMUSP00000017800 Tax_Id=10090 Gene_Symbol=Plp1 Isoform 1 of Myelin proteolipid protein	P60202	IPI00219661	IPI:IPI00219661.2|SWISS-PROT:P60201-1|ENSEMBL:ENSP00000305152|REFSEQ:NP_000524|VEGA:OTTHUMP00000023761;OTTHUMP00000062204 Tax_Id=9606 Gene_Symbol=PLP1 Isoform 1 of Myelin proteolipid protein	P60201		5	2	5	3	YES	YES
ab16moc_1090	YES	YES	Mag	MGI:96912	MAG	HGNC:6783	ENSMUSG00000036634	ENSG00000105695	17136	4099	Cluster 2059	Mag	MAG	IPI00230151	IPI:IPI00230151.1|SWISS-PROT:P20917-2|TREMBL:Q3ZB60;Q6LBU4;Q9CW70|ENSEMBL:ENSMUSP00000041464|REFSEQ:NP_034888 Tax_Id=10090 Gene_Symbol=Mag Isoform S-MAG of Myelin-associated glycoprotein precursor	P20917	IPI00026237	IPI:IPI00026237.1|SWISS-PROT:P20916|TREMBL:Q53ES7;Q53HA1;Q53HD1;Q59GD9|ENSEMBL:ENSP00000262624|REFSEQ:NP_002352|H-INV:HIT000195308|VEGA:OTTHUMP00000042047;OTTHUMP00000077499 Tax_Id=9606 Gene_Symbol=MAG Myelin-associated glycoprotein precursor	P20916		3	3	1	1
ab16moc_12	YES	YES	Myh9	MGI:107717	MYH9	HGNC:7579	ENSMUSG00000022443	ENSG00000100345	17886	4627	Cluster 119	Myh9	MYH9	IPI00788324	IPI:IPI00788324.1|TREMBL:A2VCK1;O89055;Q3UFT0;Q3UHT9;Q3UHU4;Q6KAN6;Q7TQJ6;Q811I2;Q811J9;Q99JJ3|ENSEMBL:ENSMUSP00000016771|REFSEQ:NP_071855|VEGA:OTTMUSP00000017674 Tax_Id=10090 Gene_Symbol=Myh9 15 days pregnant adult female amnion cDNA, RIKEN full-length e	A2VCK1	IPI00019502	IPI:IPI00019502.3|SWISS-PROT:P35579|TREMBL:Q60FE2;Q86XU5;Q99529|ENSEMBL:ENSP00000216181|REFSEQ:NP_002464|H-INV:HIT000242559|VEGA:OTTHUMP00000096116;OTTHUMP00000165902 Tax_Id=9606 Gene_Symbol=MYH9 Myosin-9	P35579		87	69	57	46	YES	YES
ab16moc_388	YES	YES	Myh11	MGI:102643	MYH11	HGNC:7569	ENSMUSG00000018830	ENSG00000133392	17880	4629	Cluster 1748	Myh11	MYH11	IPI00114894	IPI:IPI00114894.1|SWISS-PROT:O08638-1|TREMBL:Q69ZX3;Q8R384|ENSEMBL:ENSMUSP00000087756 Tax_Id=10090 Gene_Symbol=Myh11 Isoform 1 of Myosin-11	O08638	IPI00020501	IPI:IPI00020501.1|SWISS-PROT:P35749|TREMBL:O14794;Q16086;Q66K75|ENSEMBL:ENSP00000300036|REFSEQ:NP_002465|H-INV:HIT000000583|VEGA:OTTHUMP00000081251;OTTHUMP00000083094;OTTHUMP00000160389 Tax_Id=9606 Gene_Symbol=MYH11 Myosin-11	P35749		12	11	9	7	YES	YES
ab16moc_50	YES	YES	Myh14	MGI:1919210	MYH14	HGNC:23212	ENSMUSG00000030739	ENSG00000105357	71960	79784	Cluster 455	Myh14	MYH14	IPI00453996	IPI:IPI00453996.1|SWISS-PROT:Q6URW6-1|VEGA:OTTMUSP00000019209 Tax_Id=10090 Gene_Symbol=Myh14 Isoform 1 of Myosin-14	Q6URW6	IPI00607818	IPI:IPI00607818.1|SWISS-PROT:Q7Z406-2|TREMBL:A1L2Z2;Q14780|ENSEMBL:ENSP00000366169|REFSEQ:NP_079005|VEGA:OTTHUMP00000069966 Tax_Id=9606 Gene_Symbol=MYH14 Isoform 2 of Myosin-14	Q7Z406		47	31	28	25	YES	YES
ab16moc_7	YES	YES	Myh10	MGI:1930780	MYH10	HGNC:7568	ENSMUSG00000020900	ENSG00000133026	77579	4628	Cluster 91	Myh10	MYH10	IPI00757312	IPI:IPI00757312.1|TREMBL:Q3UH59|ENSEMBL:ENSMUSP00000090661|VEGA:OTTMUSP00000017507 Tax_Id=10090 Gene_Symbol=Myh10 CDNA, RIKEN full-length enriched library, clone:M5C1080G13 product:myosin heavy chain 10, non-muscle, full insert sequence	Q3UH59	IPI00479307	IPI:IPI00479307.3|SWISS-PROT:P35580-2|TREMBL:Q9UMG3|ENSEMBL:ENSP00000353590 Tax_Id=9606 Gene_Symbol=MYH10 Isoform 2 of Myosin-10	P35580		142	107	100	94	YES	YES
ab16moc_240	YES	YES	Myo1b	MGI:107752	MYO1B	HGNC:7596	ENSMUSG00000018417	ENSG00000128641	17912	4430	Cluster 915	Myo1b	MYO1B	IPI00408215	IPI:IPI00408215.1|SWISS-PROT:P46735-1|TREMBL:Q7TQD7|ENSEMBL:ENSMUSP00000018561|VEGA:OTTMUSP00000017715 Tax_Id=10090 Gene_Symbol=Myo1b Myo1b protein	P46735	IPI00414980	IPI:IPI00414980.2|SWISS-PROT:O43795-2|TREMBL:Q05CR5|ENSEMBL:ENSP00000341903|REFSEQ:NP_036355|VEGA:OTTHUMP00000163592 Tax_Id=9606 Gene_Symbol=MYO1B Isoform 2 of Myosin-Ib	O43795		19	12	14	14	YES
ab16moc_341	YES	YES	Myo1d	MGI:107728	MYO1D	HGNC:7598	ENSMUSG00000035441	ENSG00000176658	338367	4642	Cluster 849	Myo1d	MYO1D	IPI00408207	IPI:IPI00408207.2|SWISS-PROT:Q5SYD0-1|TREMBL:Q3UG58;Q8K063;Q91ZI5|ENSEMBL:ENSMUSP00000037819|REFSEQ:NP_796364|VEGA:OTTMUSP00000000278 Tax_Id=10090 Gene_Symbol=Myo1d Isoform 1 of Myosin-Id	Q5SYD0	IPI00329719	IPI:IPI00329719.1|SWISS-PROT:O94832-1|TREMBL:Q7Z3N6;Q8N618|ENSEMBL:ENSP00000324527|REFSEQ:NP_056009|H-INV:HIT000000452|VEGA:OTTHUMP00000181079 Tax_Id=9606 Gene_Symbol=MYO1D Isoform 1 of Myosin-Id	O94832		14	12	10	6	YES	YES
ab16moc_698	YES	YES	Myo1c	MGI:106612	MYO1C	HGNC:7597	ENSMUSG00000017774	ENSG00000197879	17913	4641	Cluster 1961	Myo1c	MYO1C	IPI00620222	IPI:IPI00620222.2|SWISS-PROT:Q9WTI7-1|TREMBL:Q5ND49|ENSEMBL:ENSMUSP00000058704;ENSMUSP00000099562;ENSMUSP00000099563|REFSEQ:NP_001074243;NP_032685|VEGA:OTTMUSP00000006508;OTTMUSP00000006510 Tax_Id=10090 Gene_Symbol=Myo1c Isoform A of Myosin-Ic	Q9WTI7	IPI00010418	IPI:IPI00010418.4|SWISS-PROT:O00159|TREMBL:A1L180;Q86Y95|ENSEMBL:ENSP00000354283|REFSEQ:NP_203693|H-INV:HIT000325087|VEGA:OTTHUMP00000182979 Tax_Id=9606 Gene_Symbol=MYO1C Myosin-Ic	O00159		6	5	5	3	YES
ab16moc_8	YES	YES	Myo5a	MGI:105976	MYO5A	HGNC:7602	ENSMUSG00000034593	ENSG00000197535	17918	4644	Cluster 54	Myo5a	MYO5A	IPI00118120	IPI:IPI00118120.1|SWISS-PROT:Q99104|ENSEMBL:ENSMUSP00000039576|REFSEQ:NP_034994|VEGA:OTTMUSP00000017756 Tax_Id=10090 Gene_Symbol=Myo5a Myosin-Va	Q99104	IPI00100956	IPI:IPI00100956.3|SWISS-PROT:Q9Y4I1-2|TREMBL:Q59FF5;Q9UES3|ENSEMBL:ENSP00000348693|VEGA:OTTHUMP00000174453 Tax_Id=9606 Gene_Symbol=MYO5A Isoform 2 of Myosin-Va	Q9Y4I1		140	116	108	102	YES	YES
ab16moc_145	YES	YES	Myo6	MGI:104785	MYO6	HGNC:7605	ENSMUSG00000033577	ENSG00000196586	17920	4646	Cluster 534	Myo6	MYO6	IPI00776145	IPI:IPI00776145.1|VEGA:OTTMUSP00000019174 Tax_Id=10090 Gene_Symbol=Myo6 146 kDa protein	-	IPI00642722	IPI:IPI00642722.2|SWISS-PROT:Q9UM54-5 Tax_Id=9606 Gene_Symbol=MYO6 Isoform 5 of Myosin-VI	Q9UM54		28	19	22	17	YES	YES
ab16moc_252	YES	YES	Myo18a	MGI:2667185	MYO18A	HGNC:31104	ENSMUSG00000000631	ENSG00000196535	360013	399687	Cluster 1528	Myo18a	MYO18A	IPI00622556	IPI:IPI00622556.3|SWISS-PROT:Q9JMH9-1|TREMBL:Q6PER1|ENSEMBL:ENSMUSP00000090563;ENSMUSP00000099546|REFSEQ:NP_035716|VEGA:OTTMUSP00000000105 Tax_Id=10090 Gene_Symbol=Myo18a Isoform 1 of Myosin-XVIIIa	Q9JMH9	IPI00828082	IPI:IPI00828082.1|SWISS-PROT:Q92614-4|TREMBL:Q5QD01|REFSEQ:NP_976063 Tax_Id=9606 Gene_Symbol=MYO18A Isoform 4 of Myosin-XVIIIa	Q92614		18	8	12	7	YES	YES
ab16moc_147	YES	YES	Cdc42bpb	MGI:2136459	CDC42BPB	HGNC:1738	ENSMUSG00000021279	ENSG00000198752	217866	9578	Cluster 843	Cdc42bpb	CDC42BPB	IPI00114613	IPI:IPI00114613.3|SWISS-PROT:Q7TT50|ENSEMBL:ENSMUSP00000042565|REFSEQ:NP_898837 Tax_Id=10090 Gene_Symbol=Cdc42bpb Serine/threonine-protein kinase MRCK beta	Q7TT50	IPI00477763	IPI:IPI00477763.4|SWISS-PROT:Q9Y5S2|TREMBL:Q86TR8;Q86XZ8|ENSEMBL:ENSP00000355237|REFSEQ:NP_006026|H-INV:HIT000070596|VEGA:OTTHUMP00000028140;OTTHUMP00000066098 Tax_Id=9606 Gene_Symbol=CDC42BPB Serine/threonine-protein kinase MRCK beta	Q9Y5S2		28	16	18	18	YES	YES
ab16moc_906	YES	YES	Cdc42bpa	MGI:2441841	CDC42BPA	HGNC:1737	ENSMUSG00000026490	ENSG00000143776	226751	8476	Cluster 2161	Cdc42bpa	CDC42BPA	IPI00652736	IPI:IPI00652736.3|SWISS-PROT:Q3UU96-2|REFSEQ:XP_905406;XP_981161;XP_999389|VEGA:OTTMUSP00000024389 Tax_Id=10090 Gene_Symbol=Cdc42bpa Cdc42 binding protein kinase alpha isoform 11	Q3UU96	IPI00640957	IPI:IPI00640957.2|SWISS-PROT:Q5VT25-2|TREMBL:Q5HYB0|ENSEMBL:ENSP00000355728|VEGA:OTTHUMP00000035730 Tax_Id=9606 Gene_Symbol=CDC42BPA Isoform 2 of Serine/threonine-protein kinase MRCK alpha	Q5VT25		4	1	5	3		YES
ab16moc_208	YES	YES	Sbf1	MGI:1925230	SBF1	HGNC:10542	ENSMUSG00000036529	ENSG00000100241	77980	6305	Cluster 1113	Sbf1	SBF1	IPI00752390	IPI:IPI00752390.2|TREMBL:Q6ZPE2|ENSEMBL:ENSMUSP00000080149|REFSEQ:XP_001003517;XP_900013 Tax_Id=10090 Gene_Symbol=Sbf1 SET binding factor 1 isoform 6	Q6ZPE2	IPI00029446	IPI:IPI00029446.2|SWISS-PROT:O95248-1|ENSEMBL:ENSP00000252027 Tax_Id=9606 Gene_Symbol=SBF1 Isoform 1 of SET-binding factor 1	O95248		21	9	16	16	YES	YES
ab16moc_1246	YES	YES	Nnt	MGI:109279	NNT	HGNC:7863	ENSMUSG00000025453	ENSG00000112992	18115	23530	Cluster 873	Nnt	NNT	IPI00323166	IPI:IPI00323166.2|SWISS-PROT:Q61941 Tax_Id=10090 Gene_Symbol=Nnt NAD(P) transhydrogenase, mitochondrial precursor	Q61941	IPI00337541	IPI:IPI00337541.3|SWISS-PROT:Q13423|TREMBL:Q2TB59;Q8N5H5|ENSEMBL:ENSP00000264663;ENSP00000343873;ENSP00000370939|REFSEQ:NP_036475;NP_892022|H-INV:HIT000026734|VEGA:OTTHUMP00000122432;OTTHUMP00000122433 Tax_Id=9606 Gene_Symbol=NNT NAD(P) transhydrogenase,	Q13423		2		1			YES
ab16moc_714	YES	YES	Ndufa10	MGI:1914523	NDUFA10	HGNC:7684	ENSMUSG00000026260	ENSG00000130414	67273	4705	Cluster 716	Ndufa10	NDUFA10	IPI00116748	IPI:IPI00116748.1|SWISS-PROT:Q99LC3|ENSEMBL:ENSMUSP00000027478|REFSEQ:NP_077159|VEGA:OTTMUSP00000024348 Tax_Id=10090 Gene_Symbol=Ndufa10 NADH dehydrogenase [ubiquinone] 1 alpha subcomplex subunit 10, mitochondrial precursor	Q99LC3	IPI00029561	IPI:IPI00029561.1|SWISS-PROT:O95299|TREMBL:Q53QE8;Q53SW4;Q7Z518|ENSEMBL:ENSP00000252711|REFSEQ:NP_004535|H-INV:HIT000275470|VEGA:OTTHUMP00000066056;OTTHUMP00000164498 Tax_Id=9606 Gene_Symbol=NDUFA10 NADH dehydrogenase [ubiquinone] 1 alpha subcomplex subun	O95299		6	5	4	3	YES
ab16moc_1275	YES	YES	Ndufv2	MGI:1920150	NDUFV2	HGNC:7717	ENSMUSG00000024099	ENSG00000178127	72900	4729	Cluster 951	Ndufv2	NDUFV2	IPI00845716	IPI:IPI00845716.1|SWISS-PROT:Q9D6J6-2 Tax_Id=10090 Gene_Symbol=Ndufv2 Isoform 2 of NADH dehydrogenase [ubiquinone] flavoprotein 2, mitochondrial precursor	Q9D6J6	IPI00291328	IPI:IPI00291328.3|SWISS-PROT:P19404|TREMBL:Q6IB76;Q6IPW4;Q6LEN9;Q9UEH5|ENSEMBL:ENSP00000327268|REFSEQ:NP_066552|H-INV:HIT000274539|VEGA:OTTHUMP00000041999;OTTHUMP00000071710;OTTHUMP00000162347 Tax_Id=9606 Gene_Symbol=NDUFV2 NADH dehydrogenase [ubiquinone]	P19404		2	1	2	1		YES
ab16moc_936	YES	YES	Ndufs3	MGI:1915599	NDUFS3	HGNC:7710	ENSMUSG00000005510	ENSG00000213619	68349	4722	Cluster 1026	Ndufs3	NDUFS3	IPI00121309	IPI:IPI00121309.2|SWISS-PROT:Q9DCT2|ENSEMBL:ENSMUSP00000005647|REFSEQ:NP_080964|VEGA:OTTMUSP00000015131 Tax_Id=10090 Gene_Symbol=Ndufs3 NADH dehydrogenase [ubiquinone] iron-sulfur protein 3, mitochondrial precursor	Q9DCT2	IPI00025796	IPI:IPI00025796.3|SWISS-PROT:O75489|TREMBL:Q53FM7;Q9UF24|ENSEMBL:ENSP00000263774|REFSEQ:NP_004542|H-INV:HIT000273555|VEGA:OTTHUMP00000041564 Tax_Id=9606 Gene_Symbol=NDUFS3 NADH dehydrogenase [ubiquinone] iron-sulfur protein 3, mitochondrial precursor	O75489		4	3	4	2	YES	YES
ab16moc_1097	YES	YES	Ndufs7	MGI:1922656	NDUFS7	HGNC:7714	ENSMUSG00000020153	ENSG00000115286	75406	374291	Cluster 703	Ndufs7	NDUFS7	IPI00120232	IPI:IPI00120232.1|SWISS-PROT:Q9DC70|ENSEMBL:ENSMUSP00000020361|REFSEQ:NP_083548|VEGA:OTTMUSP00000020604 Tax_Id=10090 Gene_Symbol=Ndufs7 NADH dehydrogenase [ubiquinone] iron-sulfur protein 7, mitochondrial precursor	Q9DC70	IPI00307749	IPI:IPI00307749.2|SWISS-PROT:O75251|TREMBL:Q7LD69|ENSEMBL:ENSP00000233627|REFSEQ:NP_077718|H-INV:HIT000032550|VEGA:OTTHUMP00000077392;OTTHUMP00000082977 Tax_Id=9606 Gene_Symbol=NDUFS7 NADH dehydrogenase [ubiquinone] iron-sulfur protein 7, mitochondrial pr	O75251		3	3	2	3	YES	YES
ab16moc_177	YES	YES	Ndufs1	MGI:2443241	NDUFS1	HGNC:7707	ENSMUSG00000025968	ENSG00000023228	227197	4719	Cluster 281	Ndufs1	NDUFS1	IPI00308882	IPI:IPI00308882.4|SWISS-PROT:Q91VD9|TREMBL:Q3TIU7;Q3UIQ2;Q5SUH2|ENSEMBL:ENSMUSP00000027111|REFSEQ:NP_663493|VEGA:OTTMUSP00000002422 Tax_Id=10090 Gene_Symbol=Ndufs1 NADH-ubiquinone oxidoreductase 75 kDa subunit, mitochondrial precursor	Q91VD9	IPI00604664	IPI:IPI00604664.4|SWISS-PROT:P28331|ENSEMBL:ENSP00000233190|REFSEQ:NP_004997|H-INV:HIT000089800|VEGA:OTTHUMP00000041060;OTTHUMP00000163806 Tax_Id=9606 Gene_Symbol=NDUFS1 NADH-ubiquinone oxidoreductase 75 kDa subunit, mitochondrial precursor	P28331		24	19	17	11	YES	YES
ab16moc_695	YES	YES	Ndufa9	MGI:1913358	NDUFA9	HGNC:7693	ENSMUSG00000000399	ENSG00000139180	66108	4704	Cluster 970	Ndufa9	NDUFA9	IPI00120212	IPI:IPI00120212.1|SWISS-PROT:Q9DC69|TREMBL:Q6GTD3|ENSEMBL:ENSMUSP00000085523|REFSEQ:NP_079634 Tax_Id=10090 Gene_Symbol=Ndufa9 NADH dehydrogenase [ubiquinone] 1 alpha subcomplex subunit 9, mitochondrial precursor	Q9DC69	IPI00003968	IPI:IPI00003968.1|SWISS-PROT:Q16795|TREMBL:Q9BTT5|ENSEMBL:ENSP00000266544|REFSEQ:NP_004993|H-INV:HIT000298026|VEGA:OTTHUMP00000082547;OTTHUMP00000166273 Tax_Id=9606 Gene_Symbol=NDUFA9 NADH dehydrogenase [ubiquinone] 1 alpha subcomplex subunit 9, mitochond	Q16795		6	5	5	1
ab16moc_963	YES	YES	Nebl	MGI:1921353	NEBL	HGNC:16932	ENSMUSG00000053702	ENSG00000078114	74103	10529	Cluster 1061	Nebl	NEBL	IPI00120023	IPI:IPI00120023.1|TREMBL:Q9DC07|ENSEMBL:ENSMUSP00000028080|REFSEQ:NP_083033|VEGA:OTTMUSP00000012207 Tax_Id=10090 Gene_Symbol=Nebl Adult male lung cDNA, RIKEN full-length enriched library, clone:1200007O21 product:LIM AND SH3 PROTEIN (LASP Homolog), full i	Q9DC07	IPI00418240	IPI:IPI00418240.1|TREMBL:Q59FZ8;Q70I54;Q8N8M3|ENSEMBL:ENSP00000366364|REFSEQ:NP_998734|VEGA:OTTHUMP00000019268;OTTHUMP00000071320 Tax_Id=9606 Gene_Symbol=NEBL LIM-nebulette	Q59FZ8		4	3	4	2	YES
ab16moc_962	YES	YES	Neo1	MGI:1097159	NEO1	HGNC:7754	ENSMUSG00000032340	ENSG00000067141	18007	4756	Cluster 2622	Neo1	NEO1	IPI00757220	IPI:IPI00757220.2|TREMBL:Q7TQG5|REFSEQ:NP_001036217 Tax_Id=10090 Gene_Symbol=Neo1 neogenin isoform 2	Q7TQG5	IPI00023814	IPI:IPI00023814.2|SWISS-PROT:Q92859-1|ENSEMBL:ENSP00000261908|REFSEQ:NP_002490|H-INV:HIT000220683|VEGA:OTTHUMP00000095972;OTTHUMP00000164776;OTTHUMP00000175950 Tax_Id=9606 Gene_Symbol=NEO1 Isoform 1 of Neogenin precursor	Q92859		4	1	2	3
ab16moc_218	YES	YES	Ncam1	MGI:97281	NCAM1	HGNC:7656	ENSMUSG00000039542	ENSG00000149294	17967	4684	Cluster 433	Ncam1	NCAM1	IPI00831465	IPI:IPI00831465.1|TREMBL:Q6LBU8;Q8BQ96;Q8C4B2|REFSEQ:NP_001074914 Tax_Id=10090 Gene_Symbol=Ncam1 neural cell adhesion molecule 1 isoform 1	Q6LBU8	IPI00435020	IPI:IPI00435020.3|SWISS-PROT:P13591|REFSEQ:NP_000606 Tax_Id=9606 Gene_Symbol=NCAM1 Neural cell adhesion molecule 1, 140 kDa isoform precursor	P13591		20	17	13	15	YES	YES
ab16moc_469	YES	YES	Ncam2	MGI:97282	NCAM2	HGNC:7657	ENSMUSG00000022762	ENSG00000154654	17968	4685	Cluster 905	Ncam2	NCAM2	IPI00127556	IPI:IPI00127556.1|SWISS-PROT:O35136-1|TREMBL:Q71VC5|ENSEMBL:ENSMUSP00000063468|VEGA:OTTMUSP00000015902 Tax_Id=10090 Gene_Symbol=Ncam2 Isoform Long of Neural cell adhesion molecule 2 precursor	O35136	IPI00376427	IPI:IPI00376427.3|SWISS-PROT:O15394|TREMBL:Q7Z7F2|ENSEMBL:ENSP00000284894|REFSEQ:NP_004531|H-INV:HIT000221255|VEGA:OTTHUMP00000063041;OTTHUMP00000095814 Tax_Id=9606 Gene_Symbol=NCAM2 Neural cell adhesion molecule 2 precursor	O15394		10	4	8	5	YES	YES
ab16moc_313	YES	YES	L1cam	MGI:96721	L1CAM	HGNC:6470	ENSMUSG00000031391	ENSG00000198910	16728	3897	Cluster 1039	L1cam	L1CAM	IPI00831568	IPI:IPI00831568.1|TREMBL:A2AFG7|VEGA:OTTMUSP00000022957 Tax_Id=10090 Gene_Symbol=L1cam L1 cell adhesion molecule	A2AFG7	IPI00027087	IPI:IPI00027087.1|SWISS-PROT:P32004-1|TREMBL:Q7Z3Z9|ENSEMBL:ENSP00000355380;ENSP00000359077|REFSEQ:NP_000416|H-INV:HIT000196402|VEGA:OTTHUMP00000025992;OTTHUMP00000044030;OTTHUMP00000061650 Tax_Id=9606 Gene_Symbol=L1CAM Isoform 1 of Neural cell adhesion m	P32004		15	13	11	13	YES	YES
ab16moc_451	YES	YES	Nrxn1	MGI:1096391	NRXN1	HGNC:8008	ENSMUSG00000024109	ENSG00000179915	18189	9378	Cluster 1420	Nrxn1	NRXN1	IPI00403860	IPI:IPI00403860.5|SWISS-PROT:Q9CS84-4|ENSEMBL:ENSMUSP00000057294 Tax_Id=10090 Gene_Symbol=Nrxn1 Isoform 4 of Neurexin-1-alpha precursor	Q9CS84	IPI00442299	IPI:IPI00442299.1|SWISS-PROT:Q9ULB1-1|TREMBL:Q49A31|REFSEQ:NP_004792|H-INV:HIT000059144 Tax_Id=9606 Gene_Symbol=NRXN1 Isoform 1 of Neurexin-1-alpha precursor	Q9ULB1		11	7	7	4	YES	YES
ab16moc_326	YES	YES	Nrxn3	MGI:1096389	NRXN3	HGNC:8010	ENSMUSG00000066392	ENSG00000021645	18191	9369	Cluster 992	Nrxn3	NRXN3	IPI00460715	IPI:IPI00460715.1|TREMBL:Q6ZQ56|ENSEMBL:ENSMUSP00000050075 Tax_Id=10090 Gene_Symbol=Nrxn3 MKIAA0743 protein (Fragment)	Q6ZQ56	IPI00441515	IPI:IPI00441515.2|SWISS-PROT:Q9Y4C0-2|ENSEMBL:ENSP00000331705 Tax_Id=9606 Gene_Symbol=NRXN3 Isoform 2 of Neurexin-3-alpha precursor	Q9Y4C0		15	13	8	9	YES
ab16moc_413	YES	YES	Ncan	MGI:104694	NCAN	HGNC:2465	ENSMUSG00000002341	ENSG00000130287	13004	1463	Cluster 1200	Ncan	NCAN	IPI00135563	IPI:IPI00135563.1|SWISS-PROT:P55066|ENSEMBL:ENSMUSP00000002412|REFSEQ:NP_031815|VEGA:OTTMUSP00000025040 Tax_Id=10090 Gene_Symbol=Ncan Neurocan core protein precursor	P55066	IPI00159927	IPI:IPI00159927.1|SWISS-PROT:O14594|TREMBL:Q4LE67|ENSEMBL:ENSP00000252575|REFSEQ:NP_004377|H-INV:HIT000062827|VEGA:OTTHUMP00000067842;OTTHUMP00000076314 Tax_Id=9606 Gene_Symbol=NCAN Neurocan core protein precursor	O14594		12	9	7	8	YES	YES
ab16moc_500	YES	YES	Ncdn	MGI:1347351	NCDN	HGNC:17597	ENSMUSG00000028833	ENSG00000020129	26562	23154	Cluster 667	Ncdn	NCDN	IPI00331299	IPI:IPI00331299.9|TREMBL:Q3TCW4;Q80TW1;Q91YH7;Q9CW81;Q9QUQ0;Q9Z0E0|ENSEMBL:ENSMUSP00000030637|REFSEQ:NP_036116|VEGA:OTTMUSP00000009636;OTTMUSP00000009637 Tax_Id=10090 Gene_Symbol=Ncdn NOD-derived CD11c +ve dendritic cells cDNA, RIKEN full-length enriched	Q3TCW4	IPI00555661	IPI:IPI00555661.1|TREMBL:Q9UBY2|ENSEMBL:ENSP00000362350|REFSEQ:NP_001014841|VEGA:OTTHUMP00000065370;OTTHUMP00000065375 Tax_Id=9606 Gene_Symbol=NCDN neurochondrin isoform 2	Q9UBY2		9	5	8	2	YES	YES
ab16moc_71	YES	YES	Nfasc	MGI:104753	NFASC	HGNC:29866	ENSMUSG00000026442	ENSG00000163531	269116	23114	Cluster 306	Nfasc	NFASC	IPI00329927	IPI:IPI00329927.3|SWISS-PROT:Q810U3|TREMBL:Q6P6Q1|ENSEMBL:ENSMUSP00000092148|REFSEQ:NP_874385 Tax_Id=10090 Gene_Symbol=Nfasc Neurofascin precursor	Q810U3	IPI00384998	IPI:IPI00384998.4|SWISS-PROT:O94856-7|ENSEMBL:ENSP00000342128 Tax_Id=9606 Gene_Symbol=NFASC Isoform 7 of Neurofascin precursor	O94856		41	38	21	25	YES	YES
ab16moc_30	YES	YES	Nefl	MGI:97313	NEFL	HGNC:7739	ENSMUSG00000022055	ENSG00000104725	18039	4747	Cluster 19	Nefl	NEFL	IPI00554928	IPI:IPI00554928.3|SWISS-PROT:P08551|TREMBL:Q05DD2|ENSEMBL:ENSMUSP00000022639|REFSEQ:NP_035040|VEGA:OTTMUSP00000017610 Tax_Id=10090 Gene_Symbol=Nefl Neurofilament light polypeptide	P08551	IPI00237671	IPI:IPI00237671.9|SWISS-PROT:P07196|ENSEMBL:ENSP00000311331|REFSEQ:NP_006149|H-INV:HIT000052164|VEGA:OTTHUMP00000177283 Tax_Id=9606 Gene_Symbol=NEFL Neurofilament light polypeptide	P07196		59	56	50	44	YES	YES
ab16moc_25	YES	YES	Nefm	MGI:97314	NEFM	HGNC:7734	ENSMUSG00000022054	ENSG00000104722	18040	4741	Cluster 66	Nefm	NEFM	IPI00323800	IPI:IPI00323800.6|SWISS-PROT:P08553|ENSEMBL:ENSMUSP00000022638|REFSEQ:NP_032717|VEGA:OTTMUSP00000017611 Tax_Id=10090 Gene_Symbol=Nefm Neurofilament medium polypeptide	P08553	IPI00217507	IPI:IPI00217507.5|SWISS-PROT:P07197|TREMBL:Q4QRK6;Q9UK51|ENSEMBL:ENSP00000221166|REFSEQ:NP_005373|H-INV:HIT000264572|VEGA:OTTHUMP00000041383;OTTHUMP00000162831;OTTHUMP00000177211 Tax_Id=9606 Gene_Symbol=NEFM Neurofilament medium polypeptide	P07197		62	50	46	49	YES	YES
ab16moc_484	YES	YES	Nlgn2	MGI:2681835	NLGN2	HGNC:14290	ENSMUSG00000051790	ENSG00000169992	216856	57555	Cluster 1179	Nlgn2	NLGN2	IPI00468605	IPI:IPI00468605.4|SWISS-PROT:Q69ZK9|TREMBL:Q6PHN2|ENSEMBL:ENSMUSP00000053097|REFSEQ:NP_942562|VEGA:OTTMUSP00000006214 Tax_Id=10090 Gene_Symbol=Nlgn2 Neuroligin-2 precursor	Q69ZK9	IPI00176424	IPI:IPI00176424.1|SWISS-PROT:Q8NFZ4|ENSEMBL:ENSP00000305288;ENSP00000370018|REFSEQ:NP_065846|H-INV:HIT000078584|VEGA:OTTHUMP00000135277;OTTHUMP00000182805 Tax_Id=9606 Gene_Symbol=NLGN2 Neuroligin-2 precursor	Q8NFZ4		10	5	7	9	YES	YES
ab16moc_119	YES	YES	Gap43	MGI:95639	GAP43	HGNC:4140	ENSMUSG00000047261	ENSG00000172020	14432	2596	Cluster 4	Gap43	GAP43	IPI00128973	IPI:IPI00128973.1|SWISS-PROT:P06837|ENSEMBL:ENSMUSP00000058154;ENSMUSP00000099881|REFSEQ:NP_032109|VEGA:OTTMUSP00000017444 Tax_Id=10090 Gene_Symbol=Gap43 Neuromodulin	P06837	IPI00015964	IPI:IPI00015964.4|SWISS-PROT:P17677|TREMBL:Q5U058|ENSEMBL:ENSP00000305010|REFSEQ:NP_002036|H-INV:HIT000287136|VEGA:OTTHUMP00000067527;OTTHUMP00000165225;OTTHUMP00000172324 Tax_Id=9606 Gene_Symbol=GAP43 Neuromodulin	P17677		32	20	29	24	YES	YES
ab16moc_472	YES	YES	Nrcam	MGI:104750	NRCAM	HGNC:7994	ENSMUSG00000020598	ENSG00000091129	319504	4897	Cluster 1371	Nrcam	NRCAM	IPI00395042	IPI:IPI00395042.1|SWISS-PROT:Q810U4-3 Tax_Id=10090 Gene_Symbol=Nrcam Isoform 3 of Neuronal cell adhesion molecule precursor	Q810U4	IPI00655818	IPI:IPI00655818.2|SWISS-PROT:Q92823-5|TREMBL:Q6QRP2|ENSEMBL:ENSP00000368317|REFSEQ:NP_001032210 Tax_Id=9606 Gene_Symbol=NRCAM Isoform 5 of Neuronal cell adhesion molecule precursor	Q92823		10	6	4	8	YES	YES
ab16moc_319	YES	YES	Negr1	MGI:2444846	NEGR1	HGNC:17302	ENSMUSG00000040037	ENSG00000172260	320840	257194	Cluster 191	Negr1	NEGR1	IPI00467747	IPI:IPI00467747.2|TREMBL:A0A4W9|ENSEMBL:ENSMUSP00000041132|REFSEQ:NP_796248 Tax_Id=10090 Gene_Symbol=Negr1 Adult male urinary bladder cDNA, RIKEN full-length enriched library, clone:9530002M20 product:neuronal growth regulator 1, full insert sequence	A0A4W9	IPI00176221	IPI:IPI00176221.7|SWISS-PROT:Q7Z3B1|ENSEMBL:ENSP00000350364|REFSEQ:NP_776169|H-INV:HIT000054798|VEGA:OTTHUMP00000011267;OTTHUMP00000095859 Tax_Id=9606 Gene_Symbol=NEGR1 Neuronal growth regulator 1 precursor	Q7Z3B1		15	14	13	13	YES	YES
ab16moc_532	YES	YES	Nptn	MGI:108077	NPTN	HGNC:17867	ENSMUSG00000032336	ENSG00000156642	20320	27020	Cluster 601	Nptn	NPTN	IPI00662285	IPI:IPI00662285.1|SWISS-PROT:P97300-3 Tax_Id=10090 Gene_Symbol=Nptn Isoform 3 of Neuroplastin precursor	P97300	IPI00018311	IPI:IPI00018311.1|SWISS-PROT:Q9Y639-2|TREMBL:Q9UFM8|ENSEMBL:ENSP00000290401|REFSEQ:NP_036560|H-INV:HIT000069595|VEGA:OTTHUMP00000174915;OTTHUMP00000176459;OTTHUMP00000178953 Tax_Id=9606 Gene_Symbol=NPTN Isoform 2 of Neuroplastin precursor	Q9Y639		9	7	7	5	YES	YES
ab16moc_486	YES	YES	Aifm3	MGI:1919418	AIFM3	HGNC:26398	ENSMUSG00000022763	ENSG00000183773	72168	150209	Cluster 719	Aifm3	AIFM3	IPI00312374	IPI:IPI00312374.6|SWISS-PROT:Q3TY86-1|ENSEMBL:ENSMUSP00000097704 Tax_Id=10090 Gene_Symbol=Aifm3 Isoform 1 of Apoptosis-inducing factor 3	Q3TY86	IPI00043760	IPI:IPI00043760.2|SWISS-PROT:Q96NN9-1|ENSEMBL:ENSP00000335369|REFSEQ:NP_653305 Tax_Id=9606 Gene_Symbol=AIFM3 Isoform 1 of Apoptosis-inducing factor 3	Q96NN9		10	9	7	10	YES
ab16moc_1267	YES	YES	Ddah1	MGI:1916469	DDAH1	HGNC:2715	ENSMUSG00000028194	ENSG00000153904	69219	23576	Cluster 740	Ddah1	DDAH1	IPI00109482	IPI:IPI00109482.3|SWISS-PROT:Q9CWS0|TREMBL:Q3UF01;Q6PAJ5|ENSEMBL:ENSMUSP00000029845|REFSEQ:NP_081269 Tax_Id=10090 Gene_Symbol=Ddah1 NG,NG-dimethylarginine dimethylaminohydrolase 1	Q9CWS0	IPI00220342	IPI:IPI00220342.5|SWISS-PROT:O94760|TREMBL:Q5HYC8;Q5VWX2|ENSEMBL:ENSP00000284031;ENSP00000352644|REFSEQ:NP_036269|H-INV:HIT000041899|VEGA:OTTHUMP00000012304;OTTHUMP00000058977 Tax_Id=9606 Gene_Symbol=DDAH1 NG,NG-dimethylarginine dimethylaminohydrolase 1	O94760		2	1	2	1		YES
ab16moc_1114	YES	YES	Prrt1	MGI:1932118	PRRT1	HGNC:13943	ENSMUSG00000015476	ENSG00000204314	260297	80863	Cluster 1338	Prrt1	PRRT1	IPI00130766	IPI:IPI00130766.1|SWISS-PROT:O35449|TREMBL:A2CG20;Q14C00|ENSEMBL:ENSMUSP00000015620|REFSEQ:NP_112152|VEGA:OTTMUSP00000019948 Tax_Id=10090 Gene_Symbol=Prrt1 Proline-rich transmembrane protein 1	O35449	IPI00043810	IPI:IPI00043810.4|SWISS-PROT:Q99946-1|TREMBL:Q5SSW4|ENSEMBL:ENSP00000211413|REFSEQ:NP_085154|VEGA:OTTHUMP00000014888;OTTHUMP00000029194;OTTHUMP00000029606 Tax_Id=9606 Gene_Symbol=PRRT1 Isoform 1 of Proline-rich transmembrane protein 1	Q99946		3	2	2	3	YES
ab16moc_911	YES	YES	Gbas	MGI:1278343	GBAS	HGNC:4179	ENSMUSG00000029432	ENSG00000146729	14467	2631	Cluster 795	Gbas	GBAS	IPI00115827	IPI:IPI00115827.1|SWISS-PROT:O55126 Tax_Id=10090 Gene_Symbol=Gbas Protein NipSnap2	O55126	IPI00016077	IPI:IPI00016077.1|SWISS-PROT:O75323|TREMBL:Q53X96|ENSEMBL:ENSP00000313050|REFSEQ:NP_001474|H-INV:HIT000062996|VEGA:OTTHUMP00000024550;OTTHUMP00000159734 Tax_Id=9606 Gene_Symbol=GBAS Protein NipSnap2	O75323		4	3	3	1		YES
ab16moc_934	YES	YES	Nipsnap1	MGI:1278344	NIPSNAP1	HGNC:7827	ENSMUSG00000034285	ENSG00000184117	18082	8508	Cluster 920	Nipsnap1	NIPSNAP1	IPI00115824	IPI:IPI00115824.1|SWISS-PROT:O55125|TREMBL:Q5SVB1|ENSEMBL:ENSMUSP00000049338|REFSEQ:NP_032724|VEGA:OTTMUSP00000005277 Tax_Id=10090 Gene_Symbol=Nipsnap1 Protein NipSnap1	O55125	IPI00304435	IPI:IPI00304435.3|SWISS-PROT:Q9BPW8|ENSEMBL:ENSP00000216121|REFSEQ:NP_003625|H-INV:HIT000275615|VEGA:OTTHUMP00000028856 Tax_Id=9606 Gene_Symbol=NIPSNAP1 Protein NipSnap1	Q9BPW8		4	4	2	2	YES	YES
ab16moc_1	YES	YES	Spna2	MGI:98386	SPTAN1	HGNC:11273	ENSMUSG00000057738	ENSG00000197694	20740	6709	Cluster 10	Spna2	SPTAN1	IPI00757353	IPI:IPI00757353.1|TREMBL:A3KGU7|REFSEQ:XP_001000449;XP_994029|VEGA:OTTMUSP00000018116 Tax_Id=10090 Gene_Symbol=Spna2 similar to Spectrin alpha chain, brain (Spectrin, non-erythroid alpha chain) (Alpha-II spectrin) (Fodrin alpha chain) isoform 18	A3KGU7	IPI00844215	IPI:IPI00844215.1|SWISS-PROT:Q13813-1|TREMBL:Q9UG16|ENSEMBL:ENSP00000361816|REFSEQ:NP_003118|VEGA:OTTHUMP00000022283 Tax_Id=9606 Gene_Symbol=SPTAN1 Isoform 1 of Spectrin alpha chain, brain	Q13813		281	253	206	223	YES	YES
ab16moc_107	YES	YES	Dst	MGI:104627	DST	HGNC:1090	ENSMUSG00000026131	ENSG00000151914	13518	667	Cluster 2171	Dst	DST	IPI00762553	IPI:IPI00762553.2|ENSEMBL:ENSMUSP00000095392|REFSEQ:NP_604443 Tax_Id=10090 Gene_Symbol=Dst dystonin isoform b	-	IPI00642259	IPI:IPI00642259.2|TREMBL:Q5TBT2|ENSEMBL:ENSP00000354508;ENSP00000359805|VEGA:OTTHUMP00000016654 Tax_Id=9606 Gene_Symbol=DST Dystonin	Q5TBT2		33	27	17	15	YES	YES
ab16moc_14	YES	YES	Spnb1	MGI:98387	SPTB	HGNC:11274	ENSMUSG00000021061	ENSG00000070182	20741	6710	Cluster 163	Spnb1	SPTB	IPI00131376	IPI:IPI00131376.5|SWISS-PROT:P15508|TREMBL:Q149M1;Q3UGX2;Q3UGY4;Q5DTG9;Q8BWJ8|ENSEMBL:ENSMUSP00000021458|REFSEQ:NP_038703 Tax_Id=10090 Gene_Symbol=Spnb1 spectrin beta 1	P15508	IPI00784382	IPI:IPI00784382.1|TREMBL:Q59FP5|ENSEMBL:ENSP00000374372;ENSP00000374373|REFSEQ:NP_001020029 Tax_Id=9606 Gene_Symbol=SPTB spectrin beta isoform a	Q59FP5		80	47	57	59	YES	YES
ab16moc_16	YES	YES	Macf1	MGI:108559	MACF1	HGNC:13664	ENSMUSG00000028649	ENSG00000127603	11426	23499	Cluster 957	Macf1	MACF1	IPI00229613	IPI:IPI00229613.3|SWISS-PROT:Q9QXZ0-3 Tax_Id=10090 Gene_Symbol=Macf1 Isoform 3 of Microtubule-actin cross-linking factor 1	Q9QXZ0	IPI00478226	IPI:IPI00478226.1|SWISS-PROT:Q9UPN3-4|TREMBL:Q5T3B2;Q5TBD2;Q5VW19|ENSEMBL:ENSP00000362016|VEGA:OTTHUMP00000009302;OTTHUMP00000065253 Tax_Id=9606 Gene_Symbol=MACF1 Isoform 5 of Microtubule-actin cross-linking factor 1, isoforms 1/2/3/5	Q9UPN3		71	57	43	28	YES	YES
ab16moc_21	YES	YES	Actn1	MGI:2137706	ACTN1	HGNC:163	ENSMUSG00000015143	ENSG00000072110	109711	87	Cluster 61	Actn1	ACTN1	IPI00380436	IPI:IPI00380436.1|SWISS-PROT:Q7TPR4|TREMBL:A1BN54;Q99LJ3|ENSEMBL:ENSMUSP00000021554|REFSEQ:NP_598917 Tax_Id=10090 Gene_Symbol=Actn1 Alpha-actinin-1	Q7TPR4	IPI00759776	IPI:IPI00759776.1|TREMBL:A1L0V1;Q1HE25 Tax_Id=9606 Gene_Symbol=ACTN1 Actinin alpha 1 isoform b	A1L0V1		67	48	49	52	YES	YES
ab16moc_291	YES	YES	Actn3	MGI:99678	ACTN3	HGNC:165	ENSMUSG00000006457	ENSG00000204633	11474	89	Cluster 796	Actn3	ACTN3	IPI00136701	IPI:IPI00136701.1|SWISS-PROT:O88990|TREMBL:Q14DS8;Q3UYE4|ENSEMBL:ENSMUSP00000006626|REFSEQ:NP_038484|VEGA:OTTMUSP00000017571 Tax_Id=10090 Gene_Symbol=Actn3 Alpha-actinin-3	O88990	IPI00032137	IPI:IPI00032137.1|SWISS-PROT:Q08043|TREMBL:Q4JCP9;Q4VAM3|ENSEMBL:ENSP00000374659|REFSEQ:NP_001095|H-INV:HIT000196626 Tax_Id=9606 Gene_Symbol=ACTN3 Alpha-actinin-3	Q08043		16	8	11	13	YES
ab16moc_3	YES	YES	Spnb2	MGI:98388	SPTBN1	HGNC:11275	ENSMUSG00000020315	ENSG00000115306	20742	6711	Cluster 25	Spnb2	SPNB2	IPI00319830	IPI:IPI00319830.7|SWISS-PROT:Q62261|TREMBL:Q8BQ35;Q8R1C2|ENSEMBL:ENSMUSP00000006629;ENSMUSP00000011877|REFSEQ:NP_787030|VEGA:OTTMUSP00000005519 Tax_Id=10090 Gene_Symbol=Spnb2 Spectrin beta chain, brain 1	Q62261	IPI00005614	IPI:IPI00005614.6|SWISS-PROT:Q01082-1|TREMBL:Q53R99|ENSEMBL:ENSP00000374630;ENSP00000374631|REFSEQ:NP_003119|H-INV:HIT000196936|VEGA:OTTHUMP00000165176 Tax_Id=9606 Gene_Symbol=SPTBN1 Isoform Long of Spectrin beta chain, brain 1	Q01082		220	188	171	165	YES	YES
ab16moc_49	YES	YES	Actn2	MGI:109192	ACTN2	HGNC:164	ENSMUSG00000052374	ENSG00000077522	11472	88	Cluster 130	Actn2	ACTN2	IPI00387557	IPI:IPI00387557.3|TREMBL:Q5FW75;Q8K3Q4;Q9CTH3|ENSEMBL:ENSMUSP00000067708|REFSEQ:NP_150371|VEGA:OTTMUSP00000018506 Tax_Id=10090 Gene_Symbol=Actn2 Actinin alpha 2	Q5FW75	IPI00019884	IPI:IPI00019884.1|SWISS-PROT:P35609|TREMBL:Q59FD9;Q5VXF1|ENSEMBL:ENSP00000355537|REFSEQ:NP_001094|H-INV:HIT000196625|VEGA:OTTHUMP00000037963;OTTHUMP00000044024 Tax_Id=9606 Gene_Symbol=ACTN2 Alpha-actinin-2	P35609		48	32	35	40	YES	YES
ab16moc_79	YES	YES	Actn4	MGI:1890773	ACTN4	HGNC:166	ENSMUSG00000054808	ENSG00000130402	60595	81	Cluster 61	Actn4	ACTN4	IPI00118899	IPI:IPI00118899.1|SWISS-PROT:P57780|TREMBL:Q1A602;Q3UDJ7;Q3ULT2;Q61064;Q8BP35|ENSEMBL:ENSMUSP00000066068|REFSEQ:NP_068695|VEGA:OTTMUSP00000018457 Tax_Id=10090 Gene_Symbol=Actn4 Alpha-actinin-4	P57780	IPI00013808	IPI:IPI00013808.1|SWISS-PROT:O43707|TREMBL:Q96BG6|ENSEMBL:ENSP00000252699|REFSEQ:NP_004915|H-INV:HIT000032172|VEGA:OTTHUMP00000068272;OTTHUMP00000076071;OTTHUMP00000174445 Tax_Id=9606 Gene_Symbol=ACTN4 Alpha-actinin-4	O43707		39	26	22	29	YES	YES
ab16moc_939	YES	YES	Dtna	MGI:106039	DTNA	HGNC:3057	ENSMUSG00000024302	ENSG00000134769	13527	1837	Cluster 1950	Dtna	DTNA	IPI00222694	IPI:IPI00222694.5|SWISS-PROT:Q9D2N4-7|TREMBL:Q3UHJ2;Q3UHP1;Q8CFR5|ENSEMBL:ENSMUSP00000074624|REFSEQ:NP_997533 Tax_Id=10090 Gene_Symbol=Dtna CDNA, RIKEN full-length enriched library, clone:M5C1020E04 product:dystrobrevin alpha, full insert sequence	Q9D2N4	IPI00000845	IPI:IPI00000845.1|SWISS-PROT:Q9Y4J8-1|ENSEMBL:ENSP00000269190|REFSEQ:NP_001381|VEGA:OTTHUMP00000163155 Tax_Id=9606 Gene_Symbol=DTNA Isoform 1 of Dystrobrevin alpha	Q9Y4J8		4	4	1	2
ab16moc_161	YES	YES	Syne1	MGI:1927152	SYNE1	HGNC:17089	ENSMUSG00000019769	ENSG00000131018	64009	23345	Cluster 2513	Syne1	SYNE1	IPI00403993	IPI:IPI00403993.5|TREMBL:Q7TQH5;Q9ERT7;Q9ERT8|ENSEMBL:ENSMUSP00000051825|REFSEQ:NP_001073154 Tax_Id=10090 Gene_Symbol=Syne1 synaptic nuclear envelope 1 isoform 3	Q7TQH5	IPI00247295	IPI:IPI00247295.3|SWISS-PROT:Q8NF91-4|TREMBL:Q5JV23|ENSEMBL:ENSP00000308157|REFSEQ:NP_149062|VEGA:OTTHUMP00000017440 Tax_Id=9606 Gene_Symbol=SYNE1 Isoform 4 of Nesprin-1	Q8NF91		26	23	13	10	YES
ab16moc_26	YES	YES	Spnb4	MGI:1890574	SPTBN4	HGNC:14896	ENSMUSG00000078782	ENSG00000160460	80297	57731	Cluster 533	Spnb4	SPNB4	IPI00270149	IPI:IPI00270149.2|TREMBL:Q8VBX2;Q8VIE5;Q91ZE6;Q9EQM0|ENSEMBL:ENSMUSP00000011895|REFSEQ:NP_115999 Tax_Id=10090 Gene_Symbol=Spnb4 spectrin beta 4	Q8VBX2	IPI00018829	IPI:IPI00018829.2|SWISS-PROT:Q9H254-1|TREMBL:Q71S07|ENSEMBL:ENSP00000263373|REFSEQ:NP_066022|VEGA:OTTHUMP00000078109 Tax_Id=9606 Gene_Symbol=SPTBN4 Isoform 1 of Spectrin beta chain, brain 3	Q9H254		62	41	43	37	YES	YES
ab16moc_6	YES	YES	Spnb3	MGI:1313261	SPTBN2	HGNC:11276	ENSMUSG00000067889	ENSG00000173898	20743	6712	Cluster 71	Spnb3	SPNB3	IPI00134344	IPI:IPI00134344.6|TREMBL:O35411;Q3UGZ4;Q68FG2;Q68FM2;Q6A087;Q80ZK2|ENSEMBL:ENSMUSP00000008991|REFSEQ:NP_067262 Tax_Id=10090 Gene_Symbol=Spnb3 Adult male brain UNDEFINED_CELL_LINE cDNA, RIKEN full-length enriched library, clone:M5C1106A14 product:spectrin	O35411	IPI00012645	IPI:IPI00012645.1|SWISS-PROT:O15020-1|ENSEMBL:ENSP00000311489|REFSEQ:NP_008877|H-INV:HIT000000227 Tax_Id=9606 Gene_Symbol=SPTBN2 Isoform 1 of Spectrin beta chain, brain 2	O15020		166	137	132	127	YES	YES
ab16moc_414	YES	YES	Olfm1	MGI:1860437	OLFM1	HGNC:17187	ENSMUSG00000026833	ENSG00000130558	56177	10439	Cluster 488	Olfm1	OLFM1	IPI00720005	IPI:IPI00720005.1|TREMBL:Q8R357|ENSEMBL:ENSMUSP00000028177|REFSEQ:NP_062371|VEGA:OTTMUSP00000012372 Tax_Id=10090 Gene_Symbol=Olfm1 olfactomedin 1 isoform a	Q8R357	IPI00419820	IPI:IPI00419820.2|SWISS-PROT:Q99784-2|TREMBL:Q6IMJ4;Q8N8R0|ENSEMBL:ENSP00000360858|VEGA:OTTHUMP00000022522;OTTHUMP00000022529 Tax_Id=9606 Gene_Symbol=OLFM1 NOELIN1_V3	Q99784		12	12	7	8	YES
ab16moc_659	YES	YES	Npm1	MGI:106184	NPM1	HGNC:7910	ENSMUSG00000057113	ENSG00000214774	18148	4869	Cluster 548	Npm1	NPM1	IPI00127415	IPI:IPI00127415.1|SWISS-PROT:Q61937|TREMBL:Q3U536;Q5SQB7;Q5U438|ENSEMBL:ENSMUSP00000075067|REFSEQ:NP_032748|VEGA:OTTMUSP00000005572 Tax_Id=10090 Gene_Symbol=Npm1 Nucleophosmin	Q61937	IPI00549248	IPI:IPI00549248.4|SWISS-PROT:P06748-1|TREMBL:Q9BTI9|ENSEMBL:ENSP00000296930|REFSEQ:NP_002511|H-INV:HIT000033829|VEGA:OTTHUMP00000096415;OTTHUMP00000161024 Tax_Id=9606 Gene_Symbol=NPM1 Isoform 1 of Nucleophosmin	P06748		7	6	5	5	YES
ab16moc_292	YES	YES	Opcml	MGI:97397	OPCML	HGNC:8143	ENSMUSG00000062257	ENSG00000183715	330908	4978	Cluster 145	Opcml	OPCML	IPI00463489	IPI:IPI00463489.2|TREMBL:Q3TYL3;Q6DFY2|ENSEMBL:ENSMUSP00000073493|REFSEQ:NP_808574 Tax_Id=10090 Gene_Symbol=Opcml Visual cortex cDNA, RIKEN full-length enriched library, clone:K230009E18 product:Opioid binding protein/cell adhesion molecule (OBCAM) (Opioi	Q3TYL3	IPI00001662	IPI:IPI00001662.1|SWISS-PROT:Q14982|TREMBL:Q6B0I4|ENSEMBL:ENSP00000330862|REFSEQ:NP_002536|VEGA:OTTHUMP00000095764 Tax_Id=9606 Gene_Symbol=OPCML Opioid-binding protein/cell adhesion molecule precursor	Q14982		16	13	14	14	YES	YES
ab16moc_302	YES	YES	Opa1	MGI:1921393	OPA1	HGNC:8140	ENSMUSG00000038084	ENSG00000198836	74143	4976	Cluster 574	Opa1	OPA1	IPI00403336	IPI:IPI00403336.4|SWISS-PROT:P58281-2|REFSEQ:XP_001000561 Tax_Id=10090 Gene_Symbol=Opa1 Isoform 2 of Dynamin-like 120 kDa protein, mitochondrial precursor	P58281	IPI00107753	IPI:IPI00107753.2|SWISS-PROT:O60313-6|ENSEMBL:ENSP00000355324|REFSEQ:NP_570850|VEGA:OTTHUMP00000174043 Tax_Id=9606 Gene_Symbol=OPA1 optic atrophy 1 isoform 8	O60313		15	11	4	9	YES	YES
ab16moc_169	YES	YES	Palm	MGI:1261814	PALM	HGNC:8594	ENSMUSG00000035863	ENSG00000099864	18483	5064	Cluster 105	Palm	PALM	IPI00129298	IPI:IPI00129298.1|SWISS-PROT:Q9Z0P4-1|TREMBL:Q6ZQE7;Q8CB16|ENSEMBL:ENSMUSP00000040596|REFSEQ:NP_075617 Tax_Id=10090 Gene_Symbol=Palm Isoform 1 of Paralemmin	Q9Z0P4	IPI00301023	IPI:IPI00301023.5|SWISS-PROT:O75781-1|ENSEMBL:ENSP00000341911|REFSEQ:NP_002570|H-INV:HIT000041541|VEGA:OTTHUMP00000077779;OTTHUMP00000082973 Tax_Id=9606 Gene_Symbol=PALM Isoform 1 of Paralemmin	O75781		25	18	18	21	YES	YES
ab16moc_524	YES	YES	Rapgef2	MGI:2659071	RAPGEF2	HGNC:16854	ENSMUSG00000062232	ENSG00000109756	76089	9693	Cluster 2101	Rapgef2	RAPGEF2	IPI00275899	IPI:IPI00275899.7|SWISS-PROT:Q8CHG7|TREMBL:Q6NXI4|ENSEMBL:ENSMUSP00000043884|REFSEQ:XP_203999;XP_988720 Tax_Id=10090 Gene_Symbol=Rapgef2 Rap guanine nucleotide exchange factor (GEF) 2	Q8CHG7	IPI00738628	IPI:IPI00738628.1|SWISS-PROT:Q9Y4G8|TREMBL:Q17RH5;Q4W5Q4|ENSEMBL:ENSP00000264431|REFSEQ:XP_939811;XP_949503|H-INV:HIT000000019 Tax_Id=9606 Gene_Symbol=RAPGEF2 similar to Rap guanine nucleotide exchange factor 2 (Neural RAP guanine nucleotide exchange prot	Q9Y4G8		9	3	3	7	YES	YES
ab16moc_1040	YES	YES	Ppia	MGI:97749	PPIA	HGNC:9253	ENSMUSG00000071866	ENSG00000196262	268373	5478	Cluster 64	Ppia	PPIA	IPI00554989	IPI:IPI00554989.2|SWISS-PROT:P17742|TREMBL:Q3TE63;Q3UAJ1;Q5SVY2;Q9CZK9|ENSEMBL:ENSMUSP00000071686;ENSMUSP00000088252;ENSMUSP00000093071|REFSEQ:NP_032933|VEGA:OTTMUSP00000000741 Tax_Id=10090 Gene_Symbol=Ppia Peptidyl-prolyl cis-trans isomerase A	P17742	IPI00419585	IPI:IPI00419585.9|SWISS-PROT:P62937|TREMBL:Q71V99|ENSEMBL:ENSP00000348240;ENSP00000351238|REFSEQ:NP_066953;XP_931592;XP_945701|H-INV:HIT000049372|VEGA:OTTHUMP00000025305;OTTHUMP00000063061;OTTHUMP00000159501 Tax_Id=9606 Gene_Symbol=PPIA;LOC654188;LOC65321	P62937		3	3	2	3	YES	YES
ab16moc_1277	YES	YES	Ppib	MGI:97750	PPIB	HGNC:9255	ENSMUSG00000032383	ENSG00000166794	19035	5479	Cluster 673	Ppib	PPIB	IPI00135686	IPI:IPI00135686.2|SWISS-PROT:P24369|TREMBL:Q9DCY1|ENSEMBL:ENSMUSP00000034947|REFSEQ:NP_035279 Tax_Id=10090 Gene_Symbol=Ppib peptidylprolyl isomerase B	P24369	IPI00646304	IPI:IPI00646304.4|SWISS-PROT:P23284|TREMBL:Q6IBH5|ENSEMBL:ENSP00000300026|REFSEQ:NP_000933|H-INV:HIT000034019|VEGA:OTTHUMP00000163975;OTTHUMP00000176373 Tax_Id=9606 Gene_Symbol=PPIB peptidylprolyl isomerase B precursor	P23284		2	1		2
ab16moc_1336	YES	YES	Ppid	MGI:1914988	PPID	HGNC:9257	ENSMUSG00000027804	ENSG00000171497	67738	5481	Cluster 1599	Ppid	PPID	IPI00132966	IPI:IPI00132966.3|SWISS-PROT:Q9CR16|TREMBL:Q3UB60;Q8BMX6|ENSEMBL:ENSMUSP00000029382|REFSEQ:NP_080628 Tax_Id=10090 Gene_Symbol=Ppid 40 kDa peptidyl-prolyl cis-trans isomerase	Q9CR16	IPI00003927	IPI:IPI00003927.5|SWISS-PROT:Q08752|TREMBL:Q05DH6;Q6FGM6|ENSEMBL:ENSP00000303754|REFSEQ:NP_005029|H-INV:HIT000041115 Tax_Id=9606 Gene_Symbol=PPID 40 kDa peptidyl-prolyl cis-trans isomerase	Q08752		2		2	1
ab16moc_1329	YES	YES	Fkbp1b	MGI:1336205	FKBP1B	HGNC:3712	ENSMUSG00000020635	ENSG00000119782	14226	2281	Cluster 866	Fkbp1b	FKBP1B	IPI00226591	IPI:IPI00226591.6|SWISS-PROT:Q9Z2I2|TREMBL:Q810R7|ENSEMBL:ENSMUSP00000020964|REFSEQ:NP_058559 Tax_Id=10090 Gene_Symbol=Fkbp1b FK506-binding protein 1B	Q9Z2I2	IPI00396151	IPI:IPI00396151.1|SWISS-PROT:P68106-1|TREMBL:Q53TM2|ENSEMBL:ENSP00000238793;ENSP00000370373|REFSEQ:NP_004107|VEGA:OTTHUMP00000116040 Tax_Id=9606 Gene_Symbol=FKBP1B Isoform 1 of FK506-binding protein 1B	P68106		2	1	1	2
ab16moc_1252	YES	YES	Prph	MGI:97774	PRPH	HGNC:9461	ENSMUSG00000023484	ENSG00000135406	19132	5630	Cluster 916	Prph1	PRPH	IPI00129527	IPI:IPI00129527.3|SWISS-PROT:P15331-1|ENSEMBL:ENSMUSP00000024249 Tax_Id=10090 Gene_Symbol=Prph1 Isoform 5g of Peripherin	P15331	IPI00793184	IPI:IPI00793184.1|SWISS-PROT:P41219-2 Tax_Id=9606 Gene_Symbol=PRPH Isoform 2 of Peripherin	P41219		2	2	2	1		YES
ab16moc_616	YES	YES	Prdx1	MGI:99523	PRDX1	HGNC:9352	ENSMUSG00000028691	ENSG00000117450	18477	5052	Cluster 75	Prdx1	PRDX1	IPI00121788	IPI:IPI00121788.1|SWISS-PROT:P35700|TREMBL:A2AP16;Q3U9J9|ENSEMBL:ENSMUSP00000030454|REFSEQ:NP_035164|VEGA:OTTMUSP00000009955;OTTMUSP00000009957 Tax_Id=10090 Gene_Symbol=Prdx1 Peroxiredoxin-1	P35700	IPI00000874	IPI:IPI00000874.1|SWISS-PROT:Q06830|ENSEMBL:ENSP00000262746;ENSP00000361152|REFSEQ:NP_002565;NP_859047;NP_859048|H-INV:HIT000050320|VEGA:OTTHUMP00000009234;OTTHUMP00000046443 Tax_Id=9606 Gene_Symbol=PRDX1 Peroxiredoxin-1	Q06830		7	6	4	5	YES	YES
ab16moc_1043	YES	YES	Prdx2	MGI:109486	PRDX2	HGNC:9353	ENSMUSG00000005161	ENSG00000167815	21672	7001	Cluster 149	Prdx2	PRDX2	IPI00117910	IPI:IPI00117910.3|SWISS-PROT:Q61171|TREMBL:Q5M9N9|ENSEMBL:ENSMUSP00000005292|VEGA:OTTMUSP00000018421;OTTMUSP00000018422;OTTMUSP00000018423 Tax_Id=10090 Gene_Symbol=Prdx2 Peroxiredoxin-2	Q61171	IPI00027350	IPI:IPI00027350.3|SWISS-PROT:P32119|ENSEMBL:ENSP00000301522|REFSEQ:NP_005800|H-INV:HIT000277909|VEGA:OTTHUMP00000077857;OTTHUMP00000083173;OTTHUMP00000165823 Tax_Id=9606 Gene_Symbol=PRDX2 Peroxiredoxin-2	P32119		3	3	3	3	YES	YES
ab16moc_1319	YES	YES	Prdx5	MGI:1859821	PRDX5	HGNC:9355	ENSMUSG00000024953	ENSG00000126432	54683	25824	Cluster 609	Prdx5	PRDX5	IPI00475031	IPI:IPI00475031.1|TREMBL:Q9D6X2 Tax_Id=10090 Gene_Symbol=Prdx5 Adult male tongue cDNA, RIKEN full-length enriched library, clone:2310046N07 product:peroxiredoxin 6, full insert sequence	Q9D6X2	IPI00024915	IPI:IPI00024915.2|SWISS-PROT:P30044-1|ENSEMBL:ENSP00000265462|REFSEQ:NP_036226|H-INV:HIT000070488 Tax_Id=9606 Gene_Symbol=PRDX5 Isoform Mitochondrial of Peroxiredoxin-5, mitochondrial precursor	P30044		2	2	2	2	YES	YES
ab16moc_1290	YES	YES	Acot8	MGI:2158201	ACOT8	HGNC:15919	ENSMUSG00000017307	ENSG00000101473	170789	10005	Cluster 1694	Acot8	ACOT8	IPI00309365	IPI:IPI00309365.3|SWISS-PROT:P58137|TREMBL:Q3U965|ENSEMBL:ENSMUSP00000099383|REFSEQ:NP_573503|VEGA:OTTMUSP00000001102 Tax_Id=10090 Gene_Symbol=Acot8 Acyl-coenzyme A thioesterase 8	P58137	IPI00298202	IPI:IPI00298202.1|SWISS-PROT:O14734|TREMBL:Q6FHI2|ENSEMBL:ENSP00000217455|REFSEQ:NP_005460|H-INV:HIT000062285|VEGA:OTTHUMP00000031172;OTTHUMP00000031675 Tax_Id=9606 Gene_Symbol=ACOT8 Acyl-coenzyme A thioesterase 8	O14734		2	2	1	2
ab16moc_373	YES	YES	Psd	MGI:1920978	PSD	HGNC:9507	ENSMUSG00000037126	ENSG00000059915	73728	5662	Cluster 679	Psd	PSD	IPI00464335	IPI:IPI00464335.3|TREMBL:Q5DTT2|ENSEMBL:ENSMUSP00000039728|REFSEQ:NP_082903 Tax_Id=10090 Gene_Symbol=Psd pleckstrin and Sec7 domain containing homolog	Q5DTT2	IPI00217012	IPI:IPI00217012.2|TREMBL:Q15673;Q5JWA3;Q86YI3;Q8IVG0|ENSEMBL:ENSP00000020673|REFSEQ:NP_002770|H-INV:HIT000052178|VEGA:OTTHUMP00000020364;OTTHUMP00000059199 Tax_Id=9606 Gene_Symbol=PSD Pleckstrin and Sec7 domain containing	Q15673		13	10	5	7	YES
ab16moc_314	YES	YES	Psd3	MGI:1918215	PSD3	HGNC:19093	ENSMUSG00000074285	ENSG00000156011	234353	23362	Cluster 175	Psd3	PSD3	IPI00761957	IPI:IPI00761957.1|TREMBL:Q8C0E9|ENSEMBL:ENSMUSP00000060306 Tax_Id=10090 Gene_Symbol=Psd3 13 days embryo male testis cDNA, RIKEN full-length enriched library, clone:6030438H23 product:weakly similar to HEPATOCELLULAR CARCINOMA- ASSOCIATED ANTIGEN 67	Q8C0E9	IPI00410060	IPI:IPI00410060.4|SWISS-PROT:Q9NYI0-2|ENSEMBL:ENSP00000348981|REFSEQ:NP_056125|VEGA:OTTHUMP00000177123 Tax_Id=9606 Gene_Symbol=PSD3 ADP-ribosylation factor guanine nucleotide factor 6 isoform a	Q9NYI0		15	15	12	10	YES	YES
ab16moc_445	YES	YES	Farsa	MGI:1913840	FARSA	HGNC:3592	ENSMUSG00000003808	ENSG00000179115	66590	2193	Cluster 597	Farsa	FARSA	IPI00263874	IPI:IPI00263874.3|SWISS-PROT:Q8C0C7|ENSEMBL:ENSMUSP00000003906|VEGA:OTTMUSP00000025176 Tax_Id=10090 Gene_Symbol=Farsa Phenylalanyl-tRNA synthetase alpha chain	Q8C0C7	IPI00031820	IPI:IPI00031820.3|SWISS-PROT:Q9Y285|TREMBL:Q6IBR2|ENSEMBL:ENSP00000320309|REFSEQ:NP_004452|H-INV:HIT000049466|VEGA:OTTHUMP00000076482;OTTHUMP00000083192 Tax_Id=9606 Gene_Symbol=FARSA Phenylalanyl-tRNA synthetase alpha chain	Q9Y285		11	7	3	9	YES	YES
ab16moc_400	YES	YES	Farsb	MGI:1346035	FARSB	HGNC:17800	ENSMUSG00000026245	ENSG00000116120	23874	10056	Cluster 766	Farsb	FARSB	IPI00322828	IPI:IPI00322828.1|SWISS-PROT:Q9WUA2 Tax_Id=10090 Gene_Symbol=Farsb Phenylalanyl-tRNA synthetase beta chain	Q9WUA2	IPI00300074	IPI:IPI00300074.3|SWISS-PROT:Q9NSD9|TREMBL:Q4ZFX1;Q57ZJ5;Q9BR63|ENSEMBL:ENSP00000281828|REFSEQ:NP_005678|H-INV:HIT000090558|VEGA:OTTHUMP00000164205 Tax_Id=9606 Gene_Symbol=FARSB Phenylalanyl-tRNA synthetase beta chain	Q9NSD9		12	8	7	7	YES	YES
ab16moc_277	YES	YES	Phactr1	MGI:2659021	PHACTR1	HGNC:20990	ENSMUSG00000054728	ENSG00000112137	218194	221692	Cluster 425	Phactr1	PHACTR1	IPI00719908	IPI:IPI00719908.1|SWISS-PROT:Q2M3X8-1 Tax_Id=10090 Gene_Symbol=Phactr1 Isoform 1 of Phosphatase and actin regulator 1	Q2M3X8	IPI00028318	IPI:IPI00028318.7|SWISS-PROT:Q9C0D0-1|TREMBL:Q4VY15|ENSEMBL:ENSP00000329880|REFSEQ:NP_112210|VEGA:OTTHUMP00000016044 Tax_Id=9606 Gene_Symbol=PHACTR1 Isoform 1 of Phosphatase and actin regulator 1	Q9C0D0		17	15	13	12	YES
ab16moc_96	YES	YES	Pi4ka	MGI:2448506	PI4KA	HGNC:8983	ENSMUSG00000041720	ENSG00000215513	224020	5297	Cluster 863	Pik4ca	PIK4CA	IPI00115875	IPI:IPI00115875.6|TREMBL:Q3UVT5;Q6DIC7;Q7TNG2;Q80Y45|ENSEMBL:ENSMUSP00000036162|REFSEQ:NP_001001983 Tax_Id=10090 Gene_Symbol=Pik4ca Phosphatidylinositol 4-kinase, catalytic, alpha polypeptide	Q3UVT5	IPI00070943	IPI:IPI00070943.3|SWISS-PROT:P42356-1|TREMBL:Q4LE69|ENSEMBL:ENSP00000255882|REFSEQ:NP_477352|H-INV:HIT000062248|VEGA:OTTHUMP00000028907 Tax_Id=9606 Gene_Symbol=PIK4CA Isoform 1 of Phosphatidylinositol 4-kinase alpha	P42356		35	25	24	25	YES	YES
ab16moc_1057	YES	YES	Pip4k2b	MGI:1934234	PIP4K2B	HGNC:8998	ENSMUSG00000018547	ENSG00000141720	108083	8396	Cluster 1226	Pip5k2b	PIP5K2B	IPI00336318	IPI:IPI00336318.1|SWISS-PROT:Q80XI4|TREMBL:Q3UJ95;Q91XU2|ENSEMBL:ENSMUSP00000018691|REFSEQ:NP_473392;XP_996733|VEGA:OTTMUSP00000002594 Tax_Id=10090 Gene_Symbol=Pip5k2b Phosphatidylinositol-4-phosphate 5-kinase type-2 beta	Q80XI4	IPI00216470	IPI:IPI00216470.1|SWISS-PROT:P78356-1|ENSEMBL:ENSP00000269554|REFSEQ:NP_003550|H-INV:HIT000221928|VEGA:OTTHUMP00000164155;OTTHUMP00000181264 Tax_Id=9606 Gene_Symbol=PIP5K2B Isoform 1 of Phosphatidylinositol-4-phosphate 5-kinase type-2 beta	P78356		3			3		YES
ab16moc_904	YES	YES	Pip4k2a	MGI:1298206	PIP4K2A	HGNC:8997	ENSMUSG00000026737	ENSG00000150867	18718	5305	Cluster 906	Pip5k2a	PIP5K2A	IPI00115708	IPI:IPI00115708.1|SWISS-PROT:O70172|TREMBL:Q544E3;Q9CZS7|ENSEMBL:ENSMUSP00000006912|REFSEQ:NP_032871|VEGA:OTTMUSP00000012251 Tax_Id=10090 Gene_Symbol=Pip5k2a Phosphatidylinositol-4-phosphate 5-kinase type-2 alpha	O70172	IPI00009688	IPI:IPI00009688.1|SWISS-PROT:P48426|ENSEMBL:ENSP00000365757|REFSEQ:NP_005019|H-INV:HIT000038227|VEGA:OTTHUMP00000019300;OTTHUMP00000043353 Tax_Id=9606 Gene_Symbol=PIP5K2A Phosphatidylinositol-4-phosphate 5-kinase type-2 alpha	P48426		4	3	3	4	YES	YES
ab16moc_5	YES	YES	Pclo	MGI:1349390	PCLO	HGNC:13406	ENSMUSG00000061601	ENSG00000186472	26875	27445	Cluster 250	Pclo	PCLO	IPI00225140	IPI:IPI00225140.4|SWISS-PROT:Q9QYX7-1|ENSEMBL:ENSMUSP00000071676|REFSEQ:NP_036125 Tax_Id=10090 Gene_Symbol=Pclo piccolo	Q9QYX7	IPI00411656	IPI:IPI00741460.2|REFSEQ:XP_940803 Tax_Id=9606 Gene_Symbol=PCLO similar to Protein piccolo (Aczonin) isoform 7	Q9Y6V0		173	150	132	120	YES	YES
ab16moc_262	YES	YES	Jup	MGI:96650	JUP	HGNC:6207	ENSMUSG00000001552	ENSG00000173801	16480	3728	Cluster 489	Jup	JUP	IPI00229475	IPI:IPI00229475.1|SWISS-PROT:Q02257|TREMBL:A2A4H7|ENSEMBL:ENSMUSP00000001592|REFSEQ:NP_034723|VEGA:OTTMUSP00000006595;OTTMUSP00000006596 Tax_Id=10090 Gene_Symbol=Jup Junction plakoglobin	Q02257	IPI00554711	IPI:IPI00554711.2|SWISS-PROT:P14923|TREMBL:Q15151;Q7KZ86;Q86W21;Q9BWC4|ENSEMBL:ENSP00000311113|REFSEQ:NP_002221;NP_068831|H-INV:HIT000327559|VEGA:OTTHUMP00000041892;OTTHUMP00000164732;OTTHUMP00000164735;OTTHUMP00000164738 Tax_Id=9606 Gene_Symbol=JUP Junct	P14923		18	9	15	10	YES
ab16moc_98	YES	YES	Pkp4	MGI:109281	PKP4	HGNC:9026	ENSMUSG00000026991	ENSG00000144283	227937	8502	Cluster 365	Pkp4	PKP4	IPI00473693	IPI:IPI00473693.2|SWISS-PROT:Q68FH0-1|TREMBL:A2AS46|ENSEMBL:ENSMUSP00000042249;ENSMUSP00000099815|REFSEQ:NP_080637|VEGA:OTTMUSP00000013629 Tax_Id=10090 Gene_Symbol=Pkp4 Isoform 1 of Plakophilin-4	Q68FH0	IPI00747119	IPI:IPI00747119.1|TREMBL:Q53TM5;Q86W91|ENSEMBL:ENSP00000374407|REFSEQ:NP_001005476 Tax_Id=9606 Gene_Symbol=PKP4 plakophilin 4 isoform b	Q53TM5		35	27	26	28	YES	YES
ab16moc_1326	YES	YES	Pllp	MGI:1915051	PLLP	HGNC:18553	ENSMUSG00000031775	ENSG00000102934	67801	51090	Cluster 929	Pllp	PLLP	IPI00121350	IPI:IPI00121350.1|SWISS-PROT:Q9DCU2|ENSEMBL:ENSMUSP00000034227|REFSEQ:NP_080661 Tax_Id=10090 Gene_Symbol=Pllp Plasmolipin	Q9DCU2	IPI00032485	IPI:IPI00032485.1|SWISS-PROT:Q9Y342|ENSEMBL:ENSP00000219207|REFSEQ:NP_057077|H-INV:HIT000049855|VEGA:OTTHUMP00000081590;OTTHUMP00000108211;OTTHUMP00000164670 Tax_Id=9606 Gene_Symbol=PLLP Plasmolipin	Q9Y342		2	2	1	2
ab16moc_1270	YES	YES	Plxna4	MGI:2179061	PLXNA4	HGNC:9102	ENSMUSG00000029765	ENSG00000220225	243743	91584	Cluster 2663	Plxna4	PLXNA4A	IPI00187545	IPI:IPI00187545.4|SWISS-PROT:Q80UG2|ENSEMBL:ENSMUSP00000047929|REFSEQ:XP_989298|VEGA:OTTMUSP00000015623 Tax_Id=10090 Gene_Symbol=Plxna4 Plexin-A4 precursor	Q80UG2	IPI00165931	IPI:IPI00165931.7|SWISS-PROT:Q9HCM2-1|TREMBL:A4D1N7|ENSEMBL:ENSP00000251675|H-INV:HIT000001265 Tax_Id=9606 Gene_Symbol=PLXNA4A Isoform 1 of Plexin-A4 precursor	Q9HCM2		2	2	1	1		YES
ab16moc_773	YES	YES	Plxna1	MGI:107685	PLXNA1	HGNC:9099	ENSMUSG00000030084	ENSG00000114554	18844	5361	Cluster 2000	Plxna1	PLXNA1	IPI00137311	IPI:IPI00137311.1|SWISS-PROT:P70206|TREMBL:Q3U3W7|ENSEMBL:ENSMUSP00000063066|REFSEQ:NP_032907 Tax_Id=10090 Gene_Symbol=Plxna1 Plexin-A1 precursor	P70206	IPI00552671	IPI:IPI00552671.2|SWISS-PROT:Q9UIW2|ENSEMBL:ENSP00000251772|REFSEQ:NP_115618|H-INV:HIT000324311|VEGA:OTTHUMP00000041165;OTTHUMP00000172598 Tax_Id=9606 Gene_Symbol=PLXNA1 Plexin-A1 precursor	Q9UIW2		5	3		2		YES
ab16moc_627	YES	YES	Pcbp1	MGI:1345635	PCBP1	HGNC:8647	ENSMUSG00000051695	ENSG00000169564	23983	5093	Cluster 645	Pcbp1	PCBP1	IPI00128904	IPI:IPI00128904.1|SWISS-PROT:P60335|ENSEMBL:ENSMUSP00000054863|REFSEQ:NP_035995 Tax_Id=10090 Gene_Symbol=Pcbp1 Poly(rC)-binding protein 1	P60335	IPI00016610	IPI:IPI00016610.2|SWISS-PROT:Q15365|TREMBL:Q53SS8|ENSEMBL:ENSP00000305556|REFSEQ:NP_006187|H-INV:HIT000303351|VEGA:OTTHUMP00000160048 Tax_Id=9606 Gene_Symbol=PCBP1 Poly(rC)-binding protein 1	Q15365		7	3	7
ab16moc_789	YES	YES	Pcbp2	MGI:108202	PCBP2	HGNC:8648	ENSMUSG00000056851	ENSG00000197111	18521	5094	Cluster 820	Pcbp2	PCBP2	IPI00221799	IPI:IPI00221799.1|SWISS-PROT:Q61990-3|ENSEMBL:ENSMUSP00000077509|REFSEQ:NP_035172 Tax_Id=10090 Gene_Symbol=Pcbp2 Isoform 3 of Poly(rC)-binding protein 2	Q61990	IPI00470509	IPI:IPI00470509.2|TREMBL:Q32Q82;Q68Y55|ENSEMBL:ENSP00000369102|VEGA:OTTHUMP00000167692 Tax_Id=9606 Gene_Symbol=PCBP2 PCBP2 protein	Q32Q82		5	4	5	5	YES	YES
ab16moc_1350	YES	YES	Reep5	MGI:1270152	REEP5	HGNC:30077	ENSMUSG00000005873	ENSG00000129625	13476	7905	Cluster 989	Reep5	REEP5	IPI00315463	IPI:IPI00315463.3|SWISS-PROT:Q60870|TREMBL:Q5QGU0;Q921E4;Q9CQG4|ENSEMBL:ENSMUSP00000006027|REFSEQ:NP_031900 Tax_Id=10090 Gene_Symbol=Reep5 Receptor expression enhancing protein 5	Q60870	IPI00024670	IPI:IPI00024670.5|SWISS-PROT:Q00765|ENSEMBL:ENSP00000368959;ENSP00000368960|REFSEQ:NP_005660|H-INV:HIT000056652|VEGA:OTTHUMP00000159020 Tax_Id=9606 Gene_Symbol=REEP5 Receptor expression-enhancing protein 5	Q00765		2	2
ab16moc_327	YES	YES	Kcnab2	MGI:109239	KCNAB2	HGNC:6229	ENSMUSG00000028931	ENSG00000069424	16498	8514	Cluster 231	Kcnab2	KCNAB2	IPI00315359	IPI:IPI00315359.1|SWISS-PROT:P62482|TREMBL:A2A8L3;Q3U0B0;Q3U7L1;Q3UPV6|ENSEMBL:ENSMUSP00000030768|REFSEQ:NP_034728|VEGA:OTTMUSP00000011318;OTTMUSP00000011319;OTTMUSP00000011378 Tax_Id=10090 Gene_Symbol=Kcnab2 Voltage-gated potassium channel subunit beta-2	P62482	IPI00657651	IPI:IPI00657651.1|TREMBL:Q2YD85 Tax_Id=9606 Gene_Symbol=KCNAB2 KCNAB2 protein	Q2YD85		15	13	10	11	YES
ab16moc_246	YES	YES	Kctd16	MGI:1914659	KCTD16	HGNC:29244	ENSMUSG00000051401	ENSG00000183775	383348	57528	Cluster 224	Kctd16	KCTD16	IPI00675985	IPI:IPI00675985.1|SWISS-PROT:Q5DTY9|ENSEMBL:ENSMUSP00000089547|REFSEQ:XP_915024;XP_996682 Tax_Id=10090 Gene_Symbol=Kctd16 BTB/POZ domain-containing protein KCTD16	Q5DTY9	IPI00002354	IPI:IPI00002354.4|SWISS-PROT:Q68DU8|ENSEMBL:ENSP00000329906|REFSEQ:NP_065819|H-INV:HIT000306306 Tax_Id=9606 Gene_Symbol=KCTD16 BTB/POZ domain-containing protein KCTD16	Q68DU8		19	14	12	14	YES
ab16moc_434	YES	YES	Kctd12	MGI:2145823	KCTD12	HGNC:14678	ENSMUSG00000048107	ENSG00000178695	239217	115207	Cluster 271	Kctd12	KCTD12	IPI00421206	IPI:IPI00421206.1|SWISS-PROT:Q6WVG3|TREMBL:Q69ZA6;Q8CBQ4|REFSEQ:NP_808383 Tax_Id=10090 Gene_Symbol=Kctd12 BTB/POZ domain-containing protein KCTD12	Q6WVG3	IPI00060715	IPI:IPI00060715.1|SWISS-PROT:Q96CX2|ENSEMBL:ENSP00000317141;ENSP00000366694|REFSEQ:NP_612453|H-INV:HIT000242918|VEGA:OTTHUMP00000018517;OTTHUMP00000040820 Tax_Id=9606 Gene_Symbol=KCTD12 BTB/POZ domain-containing protein KCTD12	Q96CX2		11	8	11	8	YES	YES
ab16moc_708	YES	YES	Kctd8	MGI:2443804	KCTD8	HGNC:22394	ENSMUSG00000037653	ENSG00000183783	243043	386617	Cluster 1150	Kctd8	KCTD8	IPI00227455	IPI:IPI00227455.2|SWISS-PROT:Q50H33-1|ENSEMBL:ENSMUSP00000055326|REFSEQ:NP_780728 Tax_Id=10090 Gene_Symbol=Kctd8 Isoform 1 of BTB/POZ domain-containing protein KCTD8	Q50H33	IPI00383585	IPI:IPI00383585.1|SWISS-PROT:Q6ZWB6|TREMBL:A2RU39|ENSEMBL:ENSP00000328862;ENSP00000353129|REFSEQ:NP_938167|H-INV:HIT000043220|VEGA:OTTHUMP00000125257 Tax_Id=9606 Gene_Symbol=KCTD8 BTB/POZ domain-containing protein KCTD8	Q6ZWB6		6	5	4	4	YES	YES
ab16moc_43	YES	YES	Dlg4	MGI:1277959	DLG4	HGNC:2903	ENSMUSG00000020886	ENSG00000132535	13385	1742	Cluster 60	Dlg4	DLG4	IPI00622720	IPI:IPI00622720.1|SWISS-PROT:Q62108-1|TREMBL:Q6XVF4|ENSEMBL:ENSMUSP00000018700|REFSEQ:NP_031890|VEGA:OTTMUSP00000006269 Tax_Id=10090 Gene_Symbol=Dlg4 Isoform 1 of Discs large homolog 4	Q62108	IPI00789794	IPI:IPI00789794.1|TREMBL:Q3ZCU5|VEGA:OTTHUMP00000166068 Tax_Id=9606 Gene_Symbol=DLG4 DLG4 protein	Q3ZCU5		51	43	37	34	YES	YES
ab16moc_62	YES	YES	Dlg3	MGI:1888986	DLG3	HGNC:2902	ENSMUSG00000000881	ENSG00000082458	53310	1741	Cluster 121	Dlg3	DLG3	IPI00623890	IPI:IPI00623890.1|TREMBL:Q52KF7|ENSEMBL:ENSMUSP00000000901|VEGA:OTTMUSP00000017773 Tax_Id=10090 Gene_Symbol=Dlg3 Dlgh3 protein	Q52KF7	IPI00552701	IPI:IPI00552701.1|TREMBL:Q5JUW8|ENSEMBL:ENSP00000194900|VEGA:OTTHUMP00000023477;OTTHUMP00000062025 Tax_Id=9606 Gene_Symbol=DLG3 Discs, large homolog 3	Q5JUW8		43	26	37	31	YES	YES
ab16moc_157	YES	YES	Dlg1	MGI:107231	DLG1	HGNC:2900	ENSMUSG00000022770	ENSG00000075711	13383	1739	Cluster 364	Dlg1	DLG1	IPI00408668	IPI:IPI00408668.2|SWISS-PROT:Q811D0-1|TREMBL:Q3UP61|ENSEMBL:ENSMUSP00000023454|REFSEQ:XP_622652|VEGA:OTTMUSP00000017431 Tax_Id=10090 Gene_Symbol=Dlg1 Isoform 1 of Disks large homolog 1	Q811D0	IPI00552213	IPI:IPI00552213.1|SWISS-PROT:Q12959-6|ENSEMBL:ENSP00000371228|VEGA:OTTHUMP00000165199 Tax_Id=9606 Gene_Symbol=DLG1 Isoform 6 of Disks large homolog 1	Q12959		27	15	16	22	YES	YES
ab16moc_1351	YES	YES	Mycbp2	MGI:2179432	MYCBP2	HGNC:23386	ENSMUSG00000033004	ENSG00000005810	105689	23077	Cluster 3254	Mycbp2	MYCBP2	IPI00380409	IPI:IPI00380409.1|SWISS-PROT:Q7TPH6-2 Tax_Id=10090 Gene_Symbol=Phr1 Isoform 2 of Probable E3 ubiquitin-protein ligase MYCBP2	Q7TPH6	IPI00289776	IPI:IPI00289776.3|SWISS-PROT:O75592-1|ENSEMBL:ENSP00000349892;ENSP00000353197|REFSEQ:NP_055872|H-INV:HIT000066156|VEGA:OTTHUMP00000018523;OTTHUMP00000040824 Tax_Id=9606 Gene_Symbol=MYCBP2 Protein associated with Myc	O75592		2	2
ab16moc_965	YES	YES	Lrp1	MGI:96828	LRP1	HGNC:6692	ENSMUSG00000040249	ENSG00000123384	16971	4035	Cluster 3173	Lrp1	LRP1	IPI00119063	IPI:IPI00119063.2|SWISS-PROT:Q91ZX7|TREMBL:Q3U454;Q3U5J2;Q811K6;Q8C4T5|ENSEMBL:ENSMUSP00000044004|REFSEQ:NP_032538 Tax_Id=10090 Gene_Symbol=Lrp1 Low-density lipoprotein receptor-related protein 1 precursor	Q91ZX7	IPI00020557	IPI:IPI00020557.1|SWISS-PROT:Q07954|TREMBL:Q59FG2;Q6LAF4;Q6LBN5|ENSEMBL:ENSP00000243077|REFSEQ:NP_002323|H-INV:HIT000321395|VEGA:OTTHUMP00000069354;OTTHUMP00000168137 Tax_Id=9606 Gene_Symbol=LRP1 Low-density lipoprotein receptor-related protein 1 precurso	Q07954		4	4	3
ab16moc_1302	YES	YES	Psmb6	MGI:104880	PSMB6	HGNC:9543	ENSMUSG00000018286	ENSG00000142507	19175	5694	Cluster 950	Psmb6	PSMB6	IPI00119239	IPI:IPI00119239.2|SWISS-PROT:Q60692|TREMBL:A2CFA7|ENSEMBL:ENSMUSP00000018430|REFSEQ:NP_032972|VEGA:OTTMUSP00000006323 Tax_Id=10090 Gene_Symbol=Psmb6 Proteasome subunit beta type 6 precursor	Q60692	IPI00000811	IPI:IPI00000811.2|SWISS-PROT:P28072|TREMBL:Q6IAT9|ENSEMBL:ENSP00000270586;ENSP00000370848|REFSEQ:NP_002789|H-INV:HIT000284778|VEGA:OTTHUMP00000115982;OTTHUMP00000182726 Tax_Id=9606 Gene_Symbol=PSMB6 Proteasome subunit beta type 6 precursor	P28072		2	1	1	1
ab16moc_630	YES	YES	2400003C14Rik	MGI:1919205	KIAA0174	HGNC:28977	ENSMUSG00000031729	ENSG00000182149	71955	9798	Cluster 791	KIAA0174	KIAA0174	IPI00109389	IPI:IPI00109389.1|SWISS-PROT:Q9CX00|TREMBL:Q8BHC2|ENSEMBL:ENSMUSP00000034164|REFSEQ:NP_082294 Tax_Id=10090 Gene_Symbol=2400003C14Rik Uncharacterized protein KIAA0174	Q9CX00	IPI00643007	IPI:IPI00643007.1|SWISS-PROT:P53990-3|ENSEMBL:ENSP00000330408|REFSEQ:NP_055576|VEGA:OTTHUMP00000080856;OTTHUMP00000174932 Tax_Id=9606 Gene_Symbol=KIAA0174 Isoform 3 of Uncharacterized protein KIAA0174	P53990		7	7	4	2	YES
ab16moc_1038	YES	YES	Pacsin1	MGI:1345181	PACSIN1	HGNC:8570	ENSMUSG00000040276	ENSG00000124507	23969	29993	Cluster 414	Pacsin1	PACSIN1	IPI00123613	IPI:IPI00123613.1|SWISS-PROT:Q61644|TREMBL:Q3TYF2;Q543Y7|ENSEMBL:ENSMUSP00000044168;ENSMUSP00000094973|REFSEQ:NP_035991;NP_848142|VEGA:OTTMUSP00000023642;OTTMUSP00000023643;OTTMUSP00000023644;OTTMUSP00000023645 Tax_Id=10090 Gene_Symbol=Pacsin1 Protein kin	Q61644	IPI00011515	IPI:IPI00011515.1|SWISS-PROT:Q9BY11|TREMBL:Q5TZC3|ENSEMBL:ENSP00000244458|REFSEQ:NP_065855|H-INV:HIT000028941|VEGA:OTTHUMP00000016231;OTTHUMP00000039607 Tax_Id=9606 Gene_Symbol=PACSIN1 Protein kinase C and casein kinase substrate in neurons protein 1	Q9BY11		3	1		2		YES
ab16moc_321	YES	YES	Ppp1cc	MGI:104872	PPP1CC	HGNC:9283	ENSMUSG00000004455	ENSG00000186298	19047	5501	Cluster 210	Ppp1cc	PPP1CC	IPI00227773	IPI:IPI00227773.1|SWISS-PROT:P63087-2|TREMBL:Q3U7K1|ENSEMBL:ENSMUSP00000083474|VEGA:OTTMUSP00000017568 Tax_Id=10090 Gene_Symbol=Ppp1cc Isoform Gamma-2 of Serine/threonine-protein phosphatase PP1-gamma catalytic subunit	P63087	IPI00005705	IPI:IPI00005705.1|SWISS-PROT:P36873-1|TREMBL:Q9UPN1|ENSEMBL:ENSP00000335084|REFSEQ:NP_002701|H-INV:HIT000323407|VEGA:OTTHUMP00000082907 Tax_Id=9606 Gene_Symbol=PPP1CC Isoform Gamma-1 of Serine/threonine-protein phosphatase PP1-gamma catalytic subunit	P36873		15	5	10	13	YES
ab16moc_323	YES	YES	Ppp1ca	MGI:103016	PPP1CA	HGNC:9281	ENSMUSG00000040385	ENSG00000172531	19045	5499	Cluster 210	Ppp1ca	PPP1CA	IPI00130185	IPI:IPI00130185.1|SWISS-PROT:P62137|TREMBL:Q3TYF5;Q3U8W0|ENSEMBL:ENSMUSP00000039109|REFSEQ:NP_114074 Tax_Id=10090 Gene_Symbol=Ppp1ca Serine/threonine-protein phosphatase PP1-alpha catalytic subunit	P62137	IPI00550451	IPI:IPI00550451.1|SWISS-PROT:P62136|ENSEMBL:ENSP00000365936|REFSEQ:NP_002699|H-INV:HIT000273404|VEGA:OTTHUMP00000064268 Tax_Id=9606 Gene_Symbol=PPP1CA Serine/threonine-protein phosphatase PP1-alpha catalytic subunit	P62136		15	5	10	12	YES	YES
ab16moc_1251	YES	YES	Ptpn11	MGI:99511	PTPN11	HGNC:9644	ENSMUSG00000043733	ENSG00000179295	19247	5781	Cluster 1019	Ptpn11	PTPN11	IPI00116554	IPI:IPI00116554.2|SWISS-PROT:P35235-1|ENSEMBL:ENSMUSP00000098334|REFSEQ:NP_035332 Tax_Id=10090 Gene_Symbol=Ptpn11 Isoform 1 of Tyrosine-protein phosphatase non-receptor type 11	P35235	IPI00658023	IPI:IPI00658023.1|SWISS-PROT:Q06124-1 Tax_Id=9606 Gene_Symbol=PTPN11 Isoform 1 of Tyrosine-protein phosphatase non-receptor type 11	Q06124		2	2				YES
ab16moc_103	YES	YES	Unc13a	MGI:3051532	UNC13A	HGNC:23150	ENSMUSG00000074246	ENSG00000130477	382018	23025	Cluster 636	Unc13a	UNC13A	IPI00405121	IPI:IPI00405121.5|TREMBL:Q4KUS2|ENSEMBL:ENSMUSP00000030170 Tax_Id=10090 Gene_Symbol=Unc13a Munc 13-1	Q4KUS2	IPI00164441	IPI:IPI00164441.9|SWISS-PROT:Q9UPW8|ENSEMBL:ENSP00000252773|REFSEQ:NP_001073890|H-INV:HIT000000749|VEGA:OTTHUMP00000077061 Tax_Id=9606 Gene_Symbol=UNC13A unc-13 homolog A	Q9UPW8		34	25	26	20	YES	YES
ab16moc_1321	YES	YES	Paics	MGI:1914304	PAICS	HGNC:8587	ENSMUSG00000029247	ENSG00000128050	67054	10606	Cluster 2140	Paics	PAICS	IPI00624863	IPI:IPI00624863.1|TREMBL:Q9CQ38|ENSEMBL:ENSMUSP00000031160|REFSEQ:NP_080215 Tax_Id=10090 Gene_Symbol=Paics 10 days embryo whole body cDNA, RIKEN full-length enriched library, clone:2610511I09 product:phosphoribosylaminoimidazole carboxylase, phosphoribosy	Q9CQ38	IPI00815732	IPI:IPI00815732.1|TREMBL:Q68CQ5|REFSEQ:NP_001072993 Tax_Id=9606 Gene_Symbol=PAICS phosphoribosylaminoimidazole carboxylase, phosphoribosylaminoimidazole succinocarboxamide synthetase isoform 1	Q68CQ5		2	2	2	2	YES	YES
ab16moc_220	YES	YES	Pdha1	MGI:97532	PDHA1	HGNC:8806	ENSMUSG00000031299	ENSG00000131828	18597	5160	Cluster 215	Pdha1	PDHA1	IPI00337893	IPI:IPI00337893.2|SWISS-PROT:P35486|TREMBL:Q3UFJ3|ENSEMBL:ENSMUSP00000033662|REFSEQ:NP_032836|VEGA:OTTMUSP00000020974 Tax_Id=10090 Gene_Symbol=Pdha1 Pyruvate dehydrogenase E1 component alpha subunit, somatic form, mitochondrial precursor	P35486	IPI00306301	IPI:IPI00306301.1|SWISS-PROT:P08559|TREMBL:Q53GE3;Q53H41;Q5JPT8|ENSEMBL:ENSP00000348062|REFSEQ:NP_000275|H-INV:HIT000288959|VEGA:OTTHUMP00000023015;OTTHUMP00000061348 Tax_Id=9606 Gene_Symbol=PDHA1 Pyruvate dehydrogenase E1 component alpha subunit, somatic	P08559		20	13	10	10	YES	YES
ab16moc_404	YES	YES	Pdhb	MGI:1915513	PDHB	HGNC:8808	ENSMUSG00000021748	ENSG00000168291	68263	5162	Cluster 255	Pdhb	PDHB	IPI00132042	IPI:IPI00132042.1|SWISS-PROT:Q9D051|ENSEMBL:ENSMUSP00000022268|REFSEQ:NP_077183 Tax_Id=10090 Gene_Symbol=Pdhb Pyruvate dehydrogenase E1 component subunit beta, mitochondrial precursor	Q9D051	IPI00003925	IPI:IPI00003925.6|SWISS-PROT:P11177-1|ENSEMBL:ENSP00000307241|REFSEQ:NP_000916|H-INV:HIT000195749|VEGA:OTTHUMP00000171697 Tax_Id=9606 Gene_Symbol=PDHB Isoform 1 of Pyruvate dehydrogenase E1 component subunit beta, mitochondrial precursor	P11177		12	10	8	7	YES	YES
ab16moc_159	YES	YES	Rab11fip5	MGI:1098586	RAB11FIP5	HGNC:24845	ENSMUSG00000051343	ENSG00000135631	52055	26056	Cluster 602	Rab11fip5	RAB11FIP5	IPI00480432	IPI:IPI00480432.2|TREMBL:Q6ZQ33|ENSEMBL:ENSMUSP00000087007|REFSEQ:NP_001003955 Tax_Id=10090 Gene_Symbol=Rab11fip5 RAB11 family interacting protein 5 (class I) isoform 1	Q6ZQ33	IPI00022033	IPI:IPI00022033.6|SWISS-PROT:Q9BXF6|TREMBL:Q2Z1P3|ENSEMBL:ENSP00000258098|REFSEQ:NP_056285|H-INV:HIT000000574|VEGA:OTTHUMP00000160201 Tax_Id=9606 Gene_Symbol=RAB11FIP5 Rab11 family-interacting protein 5	Q9BXF6		27	23	11	13	YES
ab16moc_55	YES	YES	Dmxl2	MGI:2444630	DMXL2	HGNC:2938	ENSMUSG00000041268	ENSG00000104093	235380	23312	Cluster 857	Dmxl2	DMXL2	IPI00605677	IPI:IPI00605677.4|SWISS-PROT:Q8BPN8|TREMBL:Q05CM4;Q69ZX5;Q8CCU3|ENSEMBL:ENSMUSP00000041830|REFSEQ:XP_358382;XP_922528;XP_978222 Tax_Id=10090 Gene_Symbol=Dmxl2 Dmx-like 2	Q8BPN8	IPI00152542	IPI:IPI00152542.1|SWISS-PROT:Q8TDJ6|TREMBL:Q8WTV7|ENSEMBL:ENSP00000251076|REFSEQ:NP_056078|H-INV:HIT000078819|VEGA:OTTHUMP00000162545;OTTHUMP00000176281 Tax_Id=9606 Gene_Symbol=DMXL2 Protein DmX-like 2	Q8TDJ6		46	40	29	30	YES	YES
ab16moc_136	YES	YES	Rph3a	MGI:102788	RPH3A	HGNC:17056	ENSMUSG00000029608	ENSG00000089169	19894	22895	Cluster 200	Rph3a	RPH3A	IPI00111151	IPI:IPI00111151.2|SWISS-PROT:P47708|TREMBL:Q768S5|ENSEMBL:ENSMUSP00000078198|REFSEQ:NP_035416 Tax_Id=10090 Gene_Symbol=Rph3a Rabphilin-3A	P47708	IPI00032227	IPI:IPI00032227.2|SWISS-PROT:Q9Y2J0-1|ENSEMBL:ENSP00000261730|H-INV:HIT000000702|VEGA:OTTHUMP00000169310 Tax_Id=9606 Gene_Symbol=RPH3A Isoform 1 of Rabphilin-3A	Q9Y2J0		30	21	19	22	YES	YES
ab16moc_768	YES	YES	Rap1gds1	MGI:2385189	RAP1GDS1	HGNC:9859	ENSMUSG00000028149	ENSG00000138698	229877	5910	Cluster 931	Rap1gds1	RAP1GDS1	IPI00310972	IPI:IPI00310972.4|TREMBL:Q921Q5|ENSEMBL:ENSMUSP00000029796|REFSEQ:NP_663519 Tax_Id=10090 Gene_Symbol=Rap1gds1 RAP1, GTP-GDP dissociation stimulator 1 isoform b	Q921Q5	IPI00619924	IPI:IPI00619924.2|SWISS-PROT:P52306-2|TREMBL:Q499L7;Q4KMV2|ENSEMBL:ENSP00000369503 Tax_Id=9606 Gene_Symbol=RAP1GDS1 RAP1GDS1 protein	P52306		5	2	3	3	YES	YES
ab16moc_378	YES	YES	Rasgrf2	MGI:109137	RASGRF2	HGNC:9876	ENSMUSG00000021708	ENSG00000113319	19418	5924	Cluster 1170	Rasgrf2	RASGRF2	IPI00108372	IPI:IPI00108372.1|TREMBL:P70392;Q3TYN3;Q9QX51|ENSEMBL:ENSMUSP00000022221|REFSEQ:NP_033053 Tax_Id=10090 Gene_Symbol=Rasgrf2 Guanine nucleotide release/exchange factor Ras-GRF2	P70392	IPI00024184	IPI:IPI00024184.2|TREMBL:O14827;Q68DX5;Q9UK56|ENSEMBL:ENSP00000265080;ENSP00000369572|REFSEQ:NP_008840|H-INV:HIT000072811|VEGA:OTTHUMP00000147545 Tax_Id=9606 Gene_Symbol=RASGRF2 Ras protein-specific guanine nucleotide-releasing factor 2	O14827		13	7	9	8	YES
ab16moc_487	YES	YES	Rasal2	MGI:2443881	RASAL2	HGNC:9874	ENSMUSG00000070565	ENSG00000075391	226525	9462	Cluster 1538	Rasal2	RASAL2	IPI00405756	IPI:IPI00405756.7|TREMBL:Q0VAV5;Q8BU92|ENSEMBL:ENSMUSP00000077423|REFSEQ:NP_808312 Tax_Id=10090 Gene_Symbol=Rasal2 RAS protein activator like 2	Q0VAV5	IPI00006854	IPI:IPI00006854.1|SWISS-PROT:Q9UJF2|ENSEMBL:ENSP00000356621|REFSEQ:NP_004832|H-INV:HIT000064140|VEGA:OTTHUMP00000032947 Tax_Id=9606 Gene_Symbol=RASAL2 Ras GTPase-activating protein nGAP	Q9UJF2		10	6	7	6	YES
ab16moc_13	YES	YES	Syngap1	MGI:3039785	SYNGAP1	HGNC:11497	ENSMUSG00000067629	ENSG00000197283	240057	8831	Cluster 1	Syngap1	SYNGAP1	IPI00663736	IPI:IPI00663736.1|ENSEMBL:ENSMUSP00000080038|REFSEQ:XP_920298;XP_990642;XP_995323 Tax_Id=10090 Gene_Symbol=Syngap1 similar to Ras GTPase-activating protein SynGAP	-	IPI00337790	IPI:IPI00337790.3|SWISS-PROT:Q96PV0-2|TREMBL:A2BEL6|VEGA:OTTHUMP00000016210 Tax_Id=9606 Gene_Symbol=SYNGAP1 Synaptic Ras GTPase activating protein 1 homolog (Fragment)	Q96PV0		81	66	69	57	YES	YES
ab16moc_522	YES	YES	Ptprz1	MGI:97816	PTPRZ1	HGNC:9685	ENSMUSG00000068748	ENSG00000106278	19283	5803	Cluster 1951	Ptprz1	PTPRZ1	IPI00125154	IPI:IPI00125154.3|TREMBL:Q810U6;Q8C4M8;Q9WUT8|REFSEQ:XP_620293;XP_993383 Tax_Id=10090 Gene_Symbol=Ptprz1 DSD-1-proteoglycan precursor	Q810U6	IPI00748312	IPI:IPI00748312.2|SWISS-PROT:P23471-1|TREMBL:A4D0W5;O76043;Q9UDR6|ENSEMBL:ENSP00000265220|REFSEQ:NP_002842|H-INV:HIT000196852|VEGA:OTTHUMP00000070392 Tax_Id=9606 Gene_Symbol=PTPRZ1 protein tyrosine phosphatase, receptor-type, zeta1 precursor	P23471		9	8	6	6	YES	YES
ab16moc_128	YES	YES	Ptprs	MGI:97815	PTPRS	HGNC:9681	ENSMUSG00000013236	ENSG00000105426	19280	5802	Cluster 627	Ptprs	PTPRS	IPI00230067	IPI:IPI00230067.3|TREMBL:Q5XJV4;Q7TT17|ENSEMBL:ENSMUSP00000025037|VEGA:OTTMUSP00000015869 Tax_Id=10090 Gene_Symbol=Ptprs Ptprs protein	Q5XJV4	IPI00299590	IPI:IPI00299590.5|SWISS-PROT:Q13332-5|TREMBL:Q59FX6;Q9UM81|ENSEMBL:ENSP00000347479|REFSEQ:NP_570925|VEGA:OTTHUMP00000077921 Tax_Id=9606 Gene_Symbol=PTPRS Isoform PTPS-F4-7 of Receptor-type tyrosine-protein phosphatase S precursor	Q13332		31	22	21	21	YES	YES
ab16moc_135	YES	YES	Ptprd	MGI:97812	PTPRD	HGNC:9668	ENSMUSG00000028399	ENSG00000153707	19266	5789	Cluster 634	Ptprd	PTPRD	IPI00465836	IPI:IPI00465836.4|TREMBL:Q3UUC2|ENSEMBL:ENSMUSP00000072353|REFSEQ:NP_035341 Tax_Id=10090 Gene_Symbol=Ptprd protein tyrosine phosphatase, receptor type, D isoform B	Q3UUC2	IPI00760703	IPI:IPI00760703.1|TREMBL:Q3KPJ0;Q59H90|REFSEQ:NP_001035802 Tax_Id=9606 Gene_Symbol=PTPRD PTPRD protein	Q3KPJ0		30	19	19	21	YES	YES
ab16moc_559	YES	YES	Ptprf	MGI:102695	PTPRF	HGNC:9670	ENSMUSG00000033295	ENSG00000142949	19268	5792	Cluster 2026	Ptprf	PTPRF	IPI00110264	IPI:IPI00110264.2|TREMBL:A2A8L5;Q6PG86;Q9EQ17|ENSEMBL:ENSMUSP00000039368|REFSEQ:NP_035343|VEGA:OTTMUSP00000009082 Tax_Id=10090 Gene_Symbol=Ptprf protein tyrosine phosphatase, receptor type, F	A2A8L5	IPI00107831	IPI:IPI00107831.3|SWISS-PROT:P10586|TREMBL:Q5T022;Q5W9G2;Q86WS0|ENSEMBL:ENSP00000353030;ENSP00000361491|REFSEQ:NP_002831|H-INV:HIT000325327|VEGA:OTTHUMP00000008683;OTTHUMP00000064967 Tax_Id=9606 Gene_Symbol=PTPRF Receptor-type tyrosine-protein phosphatase	P10586		8	5
ab16moc_63	YES	YES	Rims1	MGI:2152971	RIMS1	HGNC:17282	ENSMUSG00000041670	ENSG00000079841	116837	22999	Cluster 346	Rims1	RIMS1	IPI00118692	IPI:IPI00118692.6|SWISS-PROT:Q99NE5-1|ENSEMBL:ENSMUSP00000095420|REFSEQ:NP_444500 Tax_Id=10090 Gene_Symbol=Rims1 Isoform 1 of Regulating synaptic membrane exocytosis protein 1	Q99NE5	IPI00387015	IPI:IPI00387015.1|SWISS-PROT:Q86UR5-1|TREMBL:Q5SZK1|ENSEMBL:ENSP00000264839;ENSP00000359447|REFSEQ:NP_055804|H-INV:HIT000250949|VEGA:OTTHUMP00000016713;OTTHUMP00000016725 Tax_Id=9606 Gene_Symbol=RIMS1 Isoform 1 of Regulating synaptic membrane exocytosis p	Q86UR5		43	38	29	24	YES	YES
ab16moc_574	YES	YES	Rgs7	MGI:1346089	RGS7	HGNC:10003	ENSMUSG00000026527	ENSG00000182901	24012	6000	Cluster 769	Rgs7	RGS7	IPI00118769	IPI:IPI00118769.2|TREMBL:Q45FE4;Q80XD3|ENSEMBL:ENSMUSP00000083014 Tax_Id=10090 Gene_Symbol=Rgs7 Rgs7 protein	Q45FE4	IPI00220660	IPI:IPI00220660.1|SWISS-PROT:P49802-3|ENSEMBL:ENSP00000355520;ENSP00000355521|VEGA:OTTHUMP00000037996;OTTHUMP00000067499 Tax_Id=9606 Gene_Symbol=RGS7 Isoform 3 of Regulator of G-protein signaling 7	P49802		8	8	8	8	YES	YES
ab16moc_1136	YES	YES	Upf1	MGI:107995	UPF1	HGNC:9962	ENSMUSG00000058301	ENSG00000005007	19704	5976	Cluster 1285	Upf1	UPF1	IPI00420949	IPI:IPI00420949.2|SWISS-PROT:Q9EPU0|TREMBL:Q3UG00;Q6GYP5;Q6PHQ5;Q8K0N4|ENSEMBL:ENSMUSP00000075089|REFSEQ:NP_109605 Tax_Id=10090 Gene_Symbol=Upf1 B16 F10Y cells cDNA, RIKEN full-length enriched library, clone:G370046N24 product:regulator of nonsense transc	Q9EPU0	IPI00399170	IPI:IPI00399170.1|SWISS-PROT:Q92900-2|TREMBL:O60385|ENSEMBL:ENSP00000262803|REFSEQ:NP_002902|H-INV:HIT000052253|VEGA:OTTHUMP00000077962 Tax_Id=9606 Gene_Symbol=UPF1 Isoform 2 of Regulator of nonsense transcripts 1	Q92900		3	2	1	1
ab16moc_663	YES	YES	Clip3	MGI:1923936	CLIP3	HGNC:24314	ENSMUSG00000013921	ENSG00000105270	76686	25999	Cluster 1119	Clip3	CLIP3	IPI00265407	IPI:IPI00265407.8|TREMBL:Q7TNI1;Q9DB67|ENSEMBL:ENSMUSP00000014065|REFSEQ:NP_001074583;XP_001002472;XP_001002485;XP_920287 Tax_Id=10090 Gene_Symbol=Clip3 CLIP-170-related protein	Q7TNI1	IPI00103362	IPI:IPI00103362.3|SWISS-PROT:Q96DZ5|ENSEMBL:ENSP00000353732|REFSEQ:NP_056341|H-INV:HIT000019593|VEGA:OTTHUMP00000069681;OTTHUMP00000076286 Tax_Id=9606 Gene_Symbol=CLIP3 CAP-Gly domain-containing linker protein 3	Q96DZ5		7	5	3	4	YES
ab16moc_647	YES	YES	Rtn1	MGI:1933947	RTN1	HGNC:10467	ENSMUSG00000021087	ENSG00000139970	104001	6252	Cluster 1450	Rtn1	RTN1	IPI00395193	IPI:IPI00395193.1|SWISS-PROT:Q8K0T0|TREMBL:Q4FJL2|ENSEMBL:ENSMUSP00000077594|REFSEQ:NP_703187|VEGA:OTTMUSP00000017535 Tax_Id=10090 Gene_Symbol=Rtn1 Reticulon-1	Q8K0T0	IPI00003971	IPI:IPI00003971.1|SWISS-PROT:Q16799-1|TREMBL:Q2L7A7;Q2NKQ5|ENSEMBL:ENSP00000267484|REFSEQ:NP_066959|H-INV:HIT000192013|VEGA:OTTHUMP00000165163;OTTHUMP00000165249 Tax_Id=9606 Gene_Symbol=RTN1 Isoform RTN1-A of Reticulon-1	Q16799		7	6	3	2	YES	YES
ab16moc_814	YES	YES	Rtn3	MGI:1339970	RTN3	HGNC:10469	ENSMUSG00000024758	ENSG00000133318	20168	10313	Cluster 1998	Rtn3	RTN3	IPI00480414	IPI:IPI00480414.2|SWISS-PROT:Q9ES97-2|TREMBL:Q8C6L4|ENSEMBL:ENSMUSP00000085496|REFSEQ:NP_001003933 Tax_Id=10090 Gene_Symbol=Rtn3 Isoform 2 of Reticulon-3	Q9ES97	IPI00398795	IPI:IPI00398795.4|SWISS-PROT:O95197-2|ENSEMBL:ENSP00000344106|REFSEQ:NP_958831 Tax_Id=9606 Gene_Symbol=RTN3 Isoform 2 of Reticulon-3	O95197		5	2	4	1
ab16moc_533	YES	YES	Rtn4	MGI:1915835	RTN4	HGNC:14085	ENSMUSG00000020458	ENSG00000115310	68585	57142	Cluster 1621	Rtn4	RTN4	IPI00270767	IPI:IPI00270767.2|SWISS-PROT:Q99P72-3|ENSEMBL:ENSMUSP00000060197;ENSMUSP00000099905|REFSEQ:NP_918940|VEGA:OTTMUSP00000005512 Tax_Id=10090 Gene_Symbol=Rtn4 Isoform 2 of Reticulon-4	Q99P72	IPI00021766	IPI:IPI00021766.4|SWISS-PROT:Q9NQC3-1|TREMBL:Q3LIF1;Q53RF4;Q7L7Q8|ENSEMBL:ENSP00000337838|REFSEQ:NP_065393|H-INV:HIT000071539|VEGA:OTTHUMP00000159690 Tax_Id=9606 Gene_Symbol=RTN4 Isoform 1 of Reticulon-4	Q9NQC3		9	7	3	3	YES	YES
ab16moc_707	YES	YES	Gprc5b	MGI:1927596	GPRC5B	HGNC:13308	ENSMUSG00000008734	ENSG00000167191	64297	51704	Cluster 556	Gprc5b	GPRC5B	IPI00124890	IPI:IPI00124890.1|SWISS-PROT:Q923Z0|TREMBL:Q9JMF0|ENSEMBL:ENSMUSP00000008878|REFSEQ:NP_071865 Tax_Id=10090 Gene_Symbol=Gprc5b G-protein coupled receptor family C group 5 member B precursor	Q923Z0	IPI00008239	IPI:IPI00008239.1|SWISS-PROT:Q9NZH0|ENSEMBL:ENSP00000300571|REFSEQ:NP_057319|H-INV:HIT000072829|VEGA:OTTHUMP00000080705;OTTHUMP00000108363;OTTHUMP00000162164 Tax_Id=9606 Gene_Symbol=GPRC5B G-protein coupled receptor family C group 5 member B precursor	Q9NZH0		6	6	4	4	YES	YES
ab16moc_1249	YES	YES	Rock2	MGI:107926	ROCK2	HGNC:10252	ENSMUSG00000020580	ENSG00000134318	19878	9475	Cluster 1482	Rock2	ROCK2	IPI00108150	IPI:IPI00108150.1|SWISS-PROT:P70336|TREMBL:Q3TR46;Q3UEZ9;Q3UMT5;Q6A035;Q8CC95|ENSEMBL:ENSMUSP00000020904|REFSEQ:NP_033098 Tax_Id=10090 Gene_Symbol=Rock2 Rho-associated protein kinase 2	P70336	IPI00307155	IPI:IPI00307155.7|SWISS-PROT:O75116|TREMBL:Q14DU5;Q53QZ0;Q53SJ7|ENSEMBL:ENSP00000317985|REFSEQ:NP_004841|H-INV:HIT000000344 Tax_Id=9606 Gene_Symbol=ROCK2 Rho-associated protein kinase 2	O75116		2	1	2	1		YES
ab16moc_511	YES	YES	Rimbp2	MGI:2443235	RIMBP2	HGNC:30339	ENSMUSG00000029420	ENSG00000060709	231760	23504	Cluster 1415	Rimbp2	RIMBP2	IPI00129397	IPI:IPI00129397.6|SWISS-PROT:Q80U40|ENSEMBL:ENSMUSP00000031370|REFSEQ:XP_979287;XP_979324 Tax_Id=10090 Gene_Symbol=Rimbp2 RIM-binding protein 2	Q80U40	IPI00183206	IPI:IPI00183206.6|SWISS-PROT:O15034-1|ENSEMBL:ENSP00000261655|REFSEQ:NP_056162|H-INV:HIT000000024|VEGA:OTTHUMP00000169863 Tax_Id=9606 Gene_Symbol=RIMBP2 Isoform 1 of RIM-binding protein 2	O15034		9	5	5	9	YES	YES
ab16moc_1299	YES	YES	Rbx1	MGI:1891829	RBX1	HGNC:9928	ENSMUSG00000022400	ENSG00000100387	56438	9978	Cluster 579	Rbx1	RBX1	IPI00124752	IPI:IPI00124752.1|SWISS-PROT:P62878|ENSEMBL:ENSMUSP00000023036|REFSEQ:NP_062686 Tax_Id=10090 Gene_Symbol=Rbx1 RING-box protein 1	P62878	IPI00003386	IPI:IPI00003386.3|SWISS-PROT:P62877|ENSEMBL:ENSP00000216225|REFSEQ:NP_055063|H-INV:HIT000267494|VEGA:OTTHUMP00000028983 Tax_Id=9606 Gene_Symbol=RBX1 RING-box protein 1	P62877		2	2	1	1		YES
ab16moc_617	YES	YES	Rufy3	MGI:106484	RUFY3	HGNC:30285	ENSMUSG00000029291	ENSG00000018189	52822	22902	Cluster 502	Rufy3	RUFY3	IPI00622482	IPI:IPI00622482.2|SWISS-PROT:Q9D394-1|ENSEMBL:ENSMUSP00000031229|REFSEQ:NP_081806 Tax_Id=10090 Gene_Symbol=Rufy3 Isoform 1 of Protein RUFY3	Q9D394	IPI00033573	IPI:IPI00033573.4|SWISS-PROT:Q7L099-1|ENSEMBL:ENSP00000226328|REFSEQ:NP_055776|VEGA:OTTHUMP00000160358 Tax_Id=9606 Gene_Symbol=RUFY3 Isoform 1 of Protein RUFY3	Q7L099		7	5	5	2	YES	YES
ab16moc_122	YES	YES	Ryr2	MGI:99685	RYR2	HGNC:10484	ENSMUSG00000021313	ENSG00000198626	20191	6262	Cluster 1760	Ryr2	RYR2	IPI00338309	IPI:IPI00338309.3|TREMBL:O70181;Q60835;Q62174;Q62197;Q80ZZ5;Q9CTT8;Q9ERN6|ENSEMBL:ENSMUSP00000021750|REFSEQ:NP_076357 Tax_Id=10090 Gene_Symbol=Ryr2 Cardiac Ca2+ release channel	O70181	IPI00218501	IPI:IPI00218501.1|SWISS-PROT:Q92736-2|ENSEMBL:ENSP00000353174 Tax_Id=9606 Gene_Symbol=RYR2 Isoform 2 of Ryanodine receptor 2	Q92736		32	26	12	12	YES	YES
ab16moc_340	YES	YES	Sept2	MGI:97298	SEPT2	HGNC:7729	ENSMUSG00000026276	ENSG00000168385	18000	4735	Cluster 150	Sept2	SEPT2	IPI00114945	IPI:IPI00114945.1|SWISS-PROT:P42208|ENSEMBL:ENSMUSP00000027495|REFSEQ:NP_035021|VEGA:OTTMUSP00000024480 Tax_Id=10090 Gene_Symbol=Sept2 Septin-2	P42208	IPI00014177	IPI:IPI00014177.3|SWISS-PROT:Q15019|ENSEMBL:ENSP00000353157|REFSEQ:NP_001008491;NP_001008492;NP_004395;NP_006146|H-INV:HIT000042294|VEGA:OTTHUMP00000070464;OTTHUMP00000070466;OTTHUMP00000164575 Tax_Id=9606 Gene_Symbol=SEPT2 Septin-2	Q15019		14	11	11	12	YES	YES
ab16moc_66	YES	YES	Sept11	MGI:1277214	SEPT11	HGNC:25589	ENSMUSG00000058013	ENSG00000138758	52398	55752	Cluster 27	Sept11	SEPT11	IPI00420385	IPI:IPI00420385.4|SWISS-PROT:Q8C1B7-3|ENSEMBL:ENSMUSP00000074293 Tax_Id=10090 Gene_Symbol=Sept11 Isoform 3 of Septin-11	Q8C1B7	IPI00019376	IPI:IPI00019376.6|SWISS-PROT:Q9NVA2|TREMBL:Q4W5G1;Q96KC0;Q96SP1;Q9UFY9|ENSEMBL:ENSP00000264893|REFSEQ:NP_060713|H-INV:HIT000004185 Tax_Id=9606 Gene_Symbol=SEPT11 Septin-11	Q9NVA2		42	36	32	34	YES	YES
ab16moc_822	YES	YES	Sept10	MGI:1918110	SEPT10	HGNC:14349	ENSMUSG00000019917	ENSG00000186522	103080	151011	Cluster 1275	Sept10	SEPT10	IPI00275587	IPI:IPI00275587.6|SWISS-PROT:Q8C650-1|ENSEMBL:ENSMUSP00000086493|REFSEQ:NP_001020081 Tax_Id=10090 Gene_Symbol=Sept10 Isoform 1 of Septin-10	Q8C650	IPI00153055	IPI:IPI00153055.5|SWISS-PROT:Q9P0V9-2|TREMBL:Q86VP5;Q9Y3S8|ENSEMBL:ENSP00000334234|REFSEQ:NP_653311|H-INV:HIT000038793 Tax_Id=9606 Gene_Symbol=SEPT10 Isoform 2 of Septin-10	Q9P0V9		5	4	3	2	YES	YES
ab16moc_87	YES	YES	Sept6	MGI:1888939	SEPT6	HGNC:15848	ENSMUSG00000050379	ENSG00000125354	56526	23157	Cluster 32	Sept6	SEPT6	IPI00226602	IPI:IPI00226602.3|SWISS-PROT:Q9R1T4-3|TREMBL:Q3UUU4|ENSEMBL:ENSMUSP00000062014|REFSEQ:NP_064326|VEGA:OTTMUSP00000018594 Tax_Id=10090 Gene_Symbol=Sept6 Isoform V of Septin-6	Q9R1T4	IPI00644857	IPI:IPI00644857.1|TREMBL:Q5JTK4|ENSEMBL:ENSP00000346397|VEGA:OTTHUMP00000023917;OTTHUMP00000067359 Tax_Id=9606 Gene_Symbol=SEPT6 Septin 6	Q5JTK4		36	31	25	25	YES	YES
ab16moc_88	YES	YES	Sept8	MGI:894310	SEPT8	HGNC:16511	ENSMUSG00000018398	ENSG00000164402	20362	23176	Cluster 47	Sept8	SEPT8	IPI00331497	IPI:IPI00331497.8|SWISS-PROT:Q8CHH9-2|ENSEMBL:ENSMUSP00000018542|REFSEQ:NP_149156 Tax_Id=10090 Gene_Symbol=Sept8 Isoform 2 of Septin-8	Q8CHH9	IPI00549434	IPI:IPI00549434.1|SWISS-PROT:Q92599-1|ENSEMBL:ENSP00000327644;ENSP00000367993|H-INV:HIT000079696|VEGA:OTTHUMP00000066074;OTTHUMP00000067180 Tax_Id=9606 Gene_Symbol=SEPT8 Isoform 1 of Septin-8	Q92599		36	30	25	30	YES	YES
ab16moc_190	YES	YES	Sept4	MGI:1270156	SEPT4	HGNC:9165	ENSMUSG00000020486	ENSG00000181013	18952	5414	Cluster 155	Sept4	SEPT4	IPI00649730	IPI:IPI00649730.1|SWISS-PROT:P28661-2|VEGA:OTTMUSP00000001274 Tax_Id=10090 Gene_Symbol=Sept4 Isoform B of Septin-4	P28661	IPI00183878	IPI:IPI00183878.5|SWISS-PROT:O43236-2|ENSEMBL:ENSP00000321071|REFSEQ:NP_536341|H-INV:HIT000222100|VEGA:OTTHUMP00000041918;OTTHUMP00000182073 Tax_Id=9606 Gene_Symbol=SEPT4 Isoform B of Septin-4	O43236		23	19	15	18	YES	YES
ab16moc_78	YES	YES	Sept5	MGI:1195461	SEPT5	HGNC:9164	ENSMUSG00000072214	ENSG00000184702	18951	5413	Cluster 16	Sept5	SEPT5	IPI00416280	IPI:IPI00416280.3|SWISS-PROT:Q9Z2Q6|TREMBL:Q68FM0|ENSEMBL:ENSMUSP00000094750|REFSEQ:NP_998779 Tax_Id=10090 Gene_Symbol=Sept5 septin 5	Q9Z2Q6	IPI00792072	IPI:IPI00792072.1|TREMBL:Q59GE1|VEGA:OTTHUMP00000042184 Tax_Id=9606 Gene_Symbol=SEPT5 H5 variant	Q59GE1		39	28	31	26	YES	YES
ab16moc_51	YES	YES	Sept7	MGI:1335094	SEPT7	HGNC:1717	ENSMUSG00000001833	ENSG00000122545	235072	989	Cluster 9	Sept7	SEPT7	IPI00224626	IPI:IPI00224626.3|SWISS-PROT:O55131|TREMBL:Q3UGE0;Q3UNN1;Q8C2A3|ENSEMBL:ENSMUSP00000052745|REFSEQ:NP_033989 Tax_Id=10090 Gene_Symbol=Sept7 cell division cycle 10 homolog	O55131	IPI00816201	IPI:IPI00816201.1|SWISS-PROT:Q16181-2 Tax_Id=9606 Gene_Symbol=SEPT7 Isoform 2 of Septin-7	Q16181		47	43	27	29	YES	YES
ab16moc_1259	YES	YES	Ppp3cb	MGI:107163	PPP3CB	HGNC:9315	ENSMUSG00000021816	ENSG00000107758	19056	5532	Cluster 997	Ppp3cb	PPP3CB	IPI00475109	IPI:IPI00475109.1|SWISS-PROT:P48453-2 Tax_Id=10090 Gene_Symbol=Ppp3cb Isoform 1 of Serine/threonine-protein phosphatase 2B catalytic subunit beta isoform	P48453	IPI00027809	IPI:IPI00027809.2|SWISS-PROT:P16298-1|TREMBL:Q5F2F9;Q8N1F0|ENSEMBL:ENSP00000353881|REFSEQ:NP_066955|H-INV:HIT000195327|VEGA:OTTHUMP00000019823;OTTHUMP00000060582 Tax_Id=9606 Gene_Symbol=PPP3CB Protein phosphatase 3 (Formerly 2B), catalytic subunit, beta i	P16298		2	1				YES
ab16moc_555	YES	YES	Ppp3ca	MGI:107164	PPP3CA	HGNC:9314	ENSMUSG00000028161	ENSG00000138814	19055	5530	Cluster 753	Ppp3ca	PPP3CA	IPI00756703	IPI:IPI00756703.1|SWISS-PROT:P63328-2|VEGA:OTTMUSP00000017684 Tax_Id=10090 Gene_Symbol=Ppp3ca Isoform 2 of Serine/threonine-protein phosphatase 2B catalytic subunit alpha isoform	P63328	IPI00179415	IPI:IPI00179415.4|SWISS-PROT:Q08209-1|TREMBL:A1A441;Q9UMM5|ENSEMBL:ENSP00000320580|REFSEQ:NP_000935|H-INV:HIT000026275|VEGA:OTTHUMP00000066283;OTTHUMP00000165327 Tax_Id=9606 Gene_Symbol=PPP3CA Isoform 1 of Serine/threonine-protein phosphatase 2B catalytic	Q08209		8	6	6	6	YES	YES
ab16moc_46	YES	YES	Kalrn	MGI:2685385	KALRN	HGNC:4814	ENSMUSG00000061751	ENSG00000160145	545156	8997	Cluster 442	Kalrn	KALRN	IPI00620349	IPI:IPI00620349.3|TREMBL:A2CG53|ENSEMBL:ENSMUSP00000087084|REFSEQ:XP_899566|VEGA:OTTMUSP00000019357 Tax_Id=10090 Gene_Symbol=Kalrn Kalirin, RhoGEF kinase	A2CG53	IPI00607777	IPI:IPI00607777.2|ENSEMBL:ENSP00000353109|REFSEQ:NP_001019831|VEGA:OTTHUMP00000165774 Tax_Id=9606 Gene_Symbol=KALRN kalirin, RhoGEF kinase isoform 1	A8MSI4		50	31	27	31	YES
ab16moc_233	YES	YES	Ppp2r1a	MGI:1926334	PPP2R1A	HGNC:9302	ENSMUSG00000007564	ENSG00000105568	51792	5518	Cluster 289	Ppp2r1a	PPP2R1A	IPI00310091	IPI:IPI00310091.8|SWISS-PROT:Q76MZ3|TREMBL:Q7TMX2;Q8C2E1|ENSEMBL:ENSMUSP00000007708|REFSEQ:NP_058587|VEGA:OTTMUSP00000017454 Tax_Id=10090 Gene_Symbol=Ppp2r1a Serine/threonine-protein phosphatase 2A 65 kDa regulatory subunit A alpha isoform	Q76MZ3	IPI00554737	IPI:IPI00554737.3|SWISS-PROT:P30153|ENSEMBL:ENSP00000324804|REFSEQ:NP_055040|H-INV:HIT000091288|VEGA:OTTHUMP00000042084;OTTHUMP00000077853;OTTHUMP00000174392 Tax_Id=9606 Gene_Symbol=PPP2R1A Serine/threonine-protein phosphatase 2A 65 kDa regulatory subunit	P30153		19	12	16	16	YES	YES
ab16moc_369	YES	YES	Sgip1	MGI:1920344	SGIP1	HGNC:25412	ENSMUSG00000028524	ENSG00000118473	73094	84251	Cluster 822	Sgip1	SGIP1	IPI00623241	IPI:IPI00623241.2|TREMBL:A2AIY8|VEGA:OTTMUSP00000008381 Tax_Id=10090 Gene_Symbol=Sgip1 Novel protein	A2AIY8	IPI00217265	IPI:IPI00217265.7|SWISS-PROT:Q9BQI5-3|ENSEMBL:ENSP00000237247;ENSP00000360077|H-INV:HIT000052411|VEGA:OTTHUMP00000010740;OTTHUMP00000046899 Tax_Id=9606 Gene_Symbol=SGIP1 Isoform 3 of SH3-containing GRB2-like protein 3-interacting protein 1	Q9BQI5		13	10	9	6	YES	YES
ab16moc_396	YES	YES	Sfxn3	MGI:2137679	SFXN3	HGNC:16087	ENSMUSG00000025212	ENSG00000107819	94280	81855	Cluster 254	Sfxn3	SFXN3	IPI00126115	IPI:IPI00126115.1|SWISS-PROT:Q91V61-1|ENSEMBL:ENSMUSP00000059419|REFSEQ:NP_444427 Tax_Id=10090 Gene_Symbol=Sfxn3 Isoform 1 of Sideroflexin-3	Q91V61	IPI00329606	IPI:IPI00329606.2|SWISS-PROT:Q9BWM7|ENSEMBL:ENSP00000224807|VEGA:OTTHUMP00000020311 Tax_Id=9606 Gene_Symbol=SFXN3 Sideroflexin-3	Q9BWM7		12	12	9	7	YES	YES
ab16moc_766	YES	YES	Sfxn1	MGI:2137677	SFXN1	HGNC:16085	ENSMUSG00000021474	ENSG00000164466	14057	94081	Cluster 385	Sfxn1	SFXN1	IPI00115454	IPI:IPI00115454.3|SWISS-PROT:Q99JR1|TREMBL:Q8BPC9|ENSEMBL:ENSMUSP00000021930|REFSEQ:NP_081600 Tax_Id=10090 Gene_Symbol=Sfxn1 Sideroflexin-1	Q99JR1	IPI00009368	IPI:IPI00009368.4|SWISS-PROT:Q9H9B4|ENSEMBL:ENSP00000316905|REFSEQ:NP_073591|H-INV:HIT000077530|VEGA:OTTHUMP00000161114 Tax_Id=9606 Gene_Symbol=SFXN1 Sideroflexin-1	Q9H9B4		5	5	2	1		YES
ab16moc_573	YES	YES	Sfxn5	MGI:2137681	SFXN5	HGNC:16073	ENSMUSG00000033720	ENSG00000144040	94282	94097	Cluster 641	Sfxn5	SFXN5	IPI00221602	IPI:IPI00221602.1|SWISS-PROT:Q925N0|ENSEMBL:ENSMUSP00000041872|REFSEQ:NP_848754 Tax_Id=10090 Gene_Symbol=Sfxn5 Sideroflexin-5	Q925N0	IPI00152426	IPI:IPI00152426.1|SWISS-PROT:Q8TD22|ENSEMBL:ENSP00000272433|REFSEQ:NP_653180|H-INV:HIT000083772|VEGA:OTTHUMP00000160197 Tax_Id=9606 Gene_Symbol=SFXN5 Sideroflexin-5	Q8TD22		8	6	6	5	YES	YES
ab16moc_785	YES	YES	Srpr	MGI:1914648	SRPR	HGNC:11307	ENSMUSG00000032042	ENSG00000182934	67398	6734	Cluster 159, Cluster 1416	Srpr	PFN2	IPI00845675	IPI:IPI00845675.1|SWISS-PROT:Q9JJV2-3 Tax_Id=10090 Gene_Symbol=Pfn2 Isoform 3 of Profilin-2	Q9JJV2	IPI00219468	IPI:IPI00219468.4|SWISS-PROT:P35080-1|ENSEMBL:ENSP00000239940|REFSEQ:NP_444252|VEGA:OTTHUMP00000173191 Tax_Id=9606 Gene_Symbol=PFN2 Isoform IIa of Profilin-2	P35080		5	1	4	5		YES
ab16moc_1343	YES	YES	Ssbp1	MGI:1920040	SSBP1	HGNC:11317	ENSMUSG00000029911	ENSG00000106028	381760	6742	Cluster 1162	Ssbp1	SSBP1	IPI00111877	IPI:IPI00111877.1|SWISS-PROT:Q9CYR0|ENSEMBL:ENSMUSP00000031971|REFSEQ:NP_082634 Tax_Id=10090 Gene_Symbol=Ssbp1 Single-stranded DNA-binding protein, mitochondrial precursor	Q9CYR0	IPI00029744	IPI:IPI00029744.1|SWISS-PROT:Q04837|TREMBL:A4D1U3;Q567R6;Q75MV9|ENSEMBL:ENSP00000265304|REFSEQ:NP_003134|H-INV:HIT000075998|VEGA:OTTHUMP00000025194 Tax_Id=9606 Gene_Symbol=SSBP1 Single-stranded DNA-binding protein, mitochondrial precursor	Q04837		2	1		1
ab16moc_1074	YES	YES	Srgap3	MGI:2152938	SRGAP3	HGNC:19744	ENSMUSG00000030257	ENSG00000196220	259302	9901	Cluster 2384	Srgap3	SRGAP3	IPI00330039	IPI:IPI00330039.3|SWISS-PROT:Q812A2-1|TREMBL:Q91Z68|ENSEMBL:ENSMUSP00000085712|REFSEQ:NP_536696 Tax_Id=10090 Gene_Symbol=Srgap3 Isoform 1 of SLIT-ROBO Rho GTPase-activating protein 3	Q812A2	IPI00218087	IPI:IPI00218087.1|SWISS-PROT:O43295-1|ENSEMBL:ENSP00000348691;ENSP00000373347|REFSEQ:NP_055665|VEGA:OTTHUMP00000115707;OTTHUMP00000170165 Tax_Id=9606 Gene_Symbol=SRGAP3 Isoform 1 of SLIT-ROBO Rho GTPase-activating protein 3	O43295		3	1		3
ab16moc_923	YES	YES	Scfd1	MGI:1924233	SCFD1	HGNC:20726	ENSMUSG00000020952	ENSG00000092108	76983	23256	Cluster 1818	Scfd1	SCFD1	IPI00224219	IPI:IPI00224219.1|SWISS-PROT:Q8BRF7-1|ENSEMBL:ENSMUSP00000021335|REFSEQ:NP_084101 Tax_Id=10090 Gene_Symbol=Scfd1 Isoform 1 of Sec1 family domain-containing protein 1	Q8BRF7	IPI00165261	IPI:IPI00165261.6|SWISS-PROT:Q8WVM8|ENSEMBL:ENSP00000309417|REFSEQ:NP_057190|H-INV:HIT000000634|VEGA:OTTHUMP00000067028;OTTHUMP00000082858;OTTHUMP00000178786 Tax_Id=9606 Gene_Symbol=SCFD1 Sec1 family domain-containing protein 1	Q8WVM8		4			3		YES
ab16moc_652	YES	YES	Slc4a4	MGI:1927555	SLC4A4	HGNC:11030	ENSMUSG00000060961	ENSG00000080493	54403	8671	Cluster 1461	Slc4a4	SLC4A4	IPI00314749	IPI:IPI00314749.2|SWISS-PROT:O88343-1|TREMBL:A2VDF7|ENSEMBL:ENSMUSP00000071050|REFSEQ:NP_061230 Tax_Id=10090 Gene_Symbol=Slc4a4 Isoform 1 of Electrogenic sodium bicarbonate cotransporter 1	O88343	IPI00411338	IPI:IPI00411338.1|SWISS-PROT:Q9Y6R1-2|ENSEMBL:ENSP00000344272|REFSEQ:NP_003750|VEGA:OTTHUMP00000160355 Tax_Id=9606 Gene_Symbol=SLC4A4 Isoform 2 of Electrogenic sodium bicarbonate cotransporter 1	Q9Y6R1		7	5	4	4	YES
ab16moc_1310	YES	YES	Slc8a2	MGI:107996	SLC8A2	HGNC:11069	ENSMUSG00000030376	ENSG00000118160	110891	6543	Cluster 2763	Slc8a2	SLC8A2	IPI00170310	IPI:IPI00170310.1|TREMBL:Q68EG0;Q6ZPY3;Q8K596;Q8R504|ENSEMBL:ENSMUSP00000006175|REFSEQ:NP_683748 Tax_Id=10090 Gene_Symbol=Slc8a2 Sodium-calcium exchanger	Q68EG0	IPI00010343	IPI:IPI00010343.3|SWISS-PROT:Q9UPR5|ENSEMBL:ENSP00000236877|REFSEQ:NP_055878|H-INV:HIT000000804|VEGA:OTTHUMP00000042072;OTTHUMP00000078086 Tax_Id=9606 Gene_Symbol=SLC8A2 Sodium/calcium exchanger 2 precursor	Q9UPR5		2	1	2	2
ab16moc_687	YES	YES	Atp1b1	MGI:88108	ATP1B1	HGNC:804	ENSMUSG00000026576	ENSG00000143153	11931	481	Cluster 520	Atp1b1	ATP1B1	IPI00121550	IPI:IPI00121550.2|SWISS-PROT:P14094|TREMBL:Q3TRA6;Q3TSQ1;Q3TV47;Q545P0|ENSEMBL:ENSMUSP00000027863|REFSEQ:NP_033851 Tax_Id=10090 Gene_Symbol=Atp1b1 Sodium/potassium-transporting ATPase subunit beta-1	P14094	IPI00747849	IPI:IPI00747849.1|SWISS-PROT:P05026-2|TREMBL:Q6LEU2|ENSEMBL:ENSP00000356787|REFSEQ:NP_001001787|H-INV:HIT000218352 Tax_Id=9606 Gene_Symbol=ATP1B1 Isoform 2 of Sodium/potassium-transporting ATPase subunit beta-1	P05026		6	6	4	3	YES	YES
ab16moc_1291	YES	YES	Atp1b2	MGI:88109	ATP1B2	HGNC:805	ENSMUSG00000041329	ENSG00000129244	11932	482	Cluster 1110	Atp1b2	ATP1B2	IPI00123704	IPI:IPI00123704.1|SWISS-PROT:P14231|TREMBL:Q5F215|ENSEMBL:ENSMUSP00000047353|REFSEQ:NP_038201|VEGA:OTTMUSP00000006200 Tax_Id=10090 Gene_Symbol=Atp1b2 Sodium/potassium-transporting ATPase subunit beta-2	P14231	IPI00293971	IPI:IPI00293971.3|SWISS-PROT:P14415|TREMBL:Q58I19|ENSEMBL:ENSP00000250111|REFSEQ:NP_001669|H-INV:HIT000196463|VEGA:OTTHUMP00000041847;OTTHUMP00000182834 Tax_Id=9606 Gene_Symbol=ATP1B2 Sodium/potassium-transporting ATPase subunit beta-2	P14415		2	1	1	2		YES
ab16moc_579	YES	YES	Slc1a2	MGI:101931	SLC1A2	HGNC:10940	ENSMUSG00000005089	ENSG00000110436	20511	6506	Cluster 725	Slc1a2	SLC1A2	IPI00470184	IPI:IPI00470184.2|SWISS-PROT:P43006-1|TREMBL:Q3USU5;Q3UYK6|ENSEMBL:ENSMUSP00000079100|REFSEQ:NP_001070982|VEGA:OTTMUSP00000015765 Tax_Id=10090 Gene_Symbol=Slc1a2 Isoform Glt-1 of Excitatory amino acid transporter 2	P43006	IPI00300020	IPI:IPI00300020.5|SWISS-PROT:P43004|TREMBL:Q541G6|ENSEMBL:ENSP00000278379|REFSEQ:NP_004162|H-INV:HIT000250672|VEGA:OTTHUMP00000070167;OTTHUMP00000165208 Tax_Id=9606 Gene_Symbol=SLC1A2 Excitatory amino acid transporter 2	P43004		8	7	7	7	YES
ab16moc_417	YES	YES	Slc1a3	MGI:99917	SLC1A3	HGNC:10941	ENSMUSG00000005360	ENSG00000079215	20512	6507	Cluster 492	Slc1a3	SLC1A3	IPI00114279	IPI:IPI00114279.1|SWISS-PROT:P56564|TREMBL:Q543U3;Q8C3T7;Q8C7W8;Q99NG1|ENSEMBL:ENSMUSP00000005493|REFSEQ:NP_683740 Tax_Id=10090 Gene_Symbol=Slc1a3 Excitatory amino acid transporter 1	P56564	IPI00015473	IPI:IPI00015473.3|SWISS-PROT:P43003|TREMBL:Q8N169|ENSEMBL:ENSP00000265113;ENSP00000371339|REFSEQ:NP_004163|H-INV:HIT000101153|VEGA:OTTHUMP00000116002 Tax_Id=9606 Gene_Symbol=SLC1A3 Excitatory amino acid transporter 1	P43003		12	9	6	8	YES	YES
ab16moc_629	YES	YES	Slc12a2	MGI:101924	SLC12A2	HGNC:10911	ENSMUSG00000024597	ENSG00000064651	20496	6558	Cluster 1775	Slc12a2	SLC12A2	IPI00135324	IPI:IPI00135324.2|SWISS-PROT:P55012|ENSEMBL:ENSMUSP00000025493|REFSEQ:NP_033220 Tax_Id=10090 Gene_Symbol=Slc12a2 solute carrier family 12, member 2	P55012	IPI00220844	IPI:IPI00220844.1|SWISS-PROT:P55011-3|TREMBL:Q59GB7|ENSEMBL:ENSP00000340878 Tax_Id=9606 Gene_Symbol=SLC12A2 Isoform 2 of Solute carrier family 12 member 2	P55011		7	4	2	6	YES
ab16moc_656	YES	YES	Slc12a5	MGI:1862037	SLC12A5	HGNC:13818	ENSMUSG00000017740	ENSG00000124140	57138	57468	Cluster 1714	Slc12a5	SLC12A5	IPI00465769	IPI:IPI00465769.3|SWISS-PROT:Q91V14|TREMBL:A2A5L0;Q3UHQ2;Q6PFC8;Q7TQC9;Q80TI5|ENSEMBL:ENSMUSP00000017884|REFSEQ:NP_065066|VEGA:OTTMUSP00000001056 Tax_Id=10090 Gene_Symbol=Slc12a5 Solute carrier family 12 member 5	Q91V14	IPI00301180	IPI:IPI00301180.4|SWISS-PROT:Q9H2X9|TREMBL:A2RTX2|ENSEMBL:ENSP00000243964|REFSEQ:NP_065759|H-INV:HIT000073919|VEGA:OTTHUMP00000031192;OTTHUMP00000031197 Tax_Id=9606 Gene_Symbol=SLC12A5 Solute carrier family 12 member 5	Q9H2X9		7	7	4	3	YES
ab16moc_964	YES	YES	Slc17a7	MGI:1920211	SLC17A7	HGNC:16704	ENSMUSG00000070570	ENSG00000104888	72961	57030	Cluster 1718	Slc17a7	SLC17A7	IPI00109153	IPI:IPI00109153.6|TREMBL:Q3TXX4;Q7TQH3;Q8JZR7|ENSEMBL:ENSMUSP00000082489|REFSEQ:NP_892038 Tax_Id=10090 Gene_Symbol=Slc17a7 Visual cortex cDNA, RIKEN full-length enriched library, clone:K530047N18 product:Brain specific Na+-dependent inorganic phosphate co	Q3TXX4	IPI00025331	IPI:IPI00025331.4|TREMBL:Q6PCD0;Q9P2U7|ENSEMBL:ENSP00000221485|REFSEQ:NP_064705|H-INV:HIT000059055|VEGA:OTTHUMP00000070029;OTTHUMP00000078074 Tax_Id=9606 Gene_Symbol=SLC17A7 solute carrier family 17, member 7	Q6PCD0		4	4	3	2	YES
ab16moc_261	YES	YES	Sorbs1	MGI:700014	SORBS1	HGNC:14565	ENSMUSG00000025006	ENSG00000095637	20411	10580	Cluster 1007	Sorbs1	SORBS1	IPI00468140	IPI:IPI00468140.2|SWISS-PROT:Q62417-1|ENSEMBL:ENSMUSP00000025973 Tax_Id=10090 Gene_Symbol=Sorbs1 Isoform 1 of Sorbin and SH3 domain-containing protein 1	Q62417	IPI00064591	IPI:IPI00064591.1|SWISS-PROT:Q9BX66-8 Tax_Id=9606 Gene_Symbol=SORBS1 Isoform 8 of Sorbin and SH3 domain-containing protein 1	Q9BX66		18	11	9	12	YES	YES
ab16moc_70	YES	YES	Sorbs2	MGI:1924574	SORBS2	HGNC:24098	ENSMUSG00000031626	ENSG00000154556	234214	8470	Cluster 320	Sorbs2	SORBS2	IPI00673886	IPI:IPI00673886.4|TREMBL:Q80TS1|ENSEMBL:ENSMUSP00000070720|REFSEQ:NP_766340 Tax_Id=10090 Gene_Symbol=Sorbs2 sorbin and SH3 domain containing 2	Q80TS1	IPI00477577	IPI:IPI00477577.1|TREMBL:O94875|ENSEMBL:ENSP00000284776|REFSEQ:NP_066547 Tax_Id=9606 Gene_Symbol=SORBS2 sorbin and SH3 domain containing 2 isoform 2	O94875		42	39	35	31	YES	YES
ab16moc_1295	YES	YES	Snx27	MGI:1923992	SNX27	HGNC:20073	ENSMUSG00000028136	ENSG00000143376	76742	81609	Cluster 1979	Snx27	SNX27	IPI00111320	IPI:IPI00111320.7|TREMBL:Q7TQL6|REFSEQ:NP_001075953|VEGA:OTTMUSP00000021102 Tax_Id=10090 Gene_Symbol=Snx27 sorting nexin family member 27 isoform 1	Q7TQL6	IPI00645303	IPI:IPI00645303.1|TREMBL:Q5VWB1|ENSEMBL:ENSP00000357834|VEGA:OTTHUMP00000015251;OTTHUMP00000059958 Tax_Id=9606 Gene_Symbol=SNX27 Sorting nexin family member 27	Q5VWB1		2	2		2		YES
ab16moc_913	YES	YES	Agk	MGI:1917173	AGK	HGNC:21869	ENSMUSG00000029916	ENSG00000006530	69923	55750	Cluster 1224	Agk	AGK	IPI00113606	IPI:IPI00113606.2|SWISS-PROT:Q9ESW4-1|ENSEMBL:ENSMUSP00000031977|REFSEQ:NP_076027 Tax_Id=10090 Gene_Symbol=Agk Isoform 1 of Acylglycerol kinase, mitochondrial precursor	Q9ESW4	IPI00019353	IPI:IPI00019353.4|SWISS-PROT:Q53H12-1|TREMBL:A4D1U5|ENSEMBL:ENSP00000347581|REFSEQ:NP_060708|H-INV:HIT000004178|VEGA:OTTHUMP00000025155 Tax_Id=9606 Gene_Symbol=AGK Isoform 1 of Acylglycerol kinase, mitochondrial precursor	Q53H12		4	2	3	2	YES
ab16moc_1115	YES	YES	Stoml2	MGI:1913842	STOML2	HGNC:14559	ENSMUSG00000028455	ENSG00000165283	66592	30968	Cluster 1541	Stoml2	STOML2	IPI00115117	IPI:IPI00115117.1|SWISS-PROT:Q99JB2|TREMBL:A2AG40|ENSEMBL:ENSMUSP00000030169|REFSEQ:NP_075720|VEGA:OTTMUSP00000007121 Tax_Id=10090 Gene_Symbol=Stoml2 Stomatin-like protein 2	Q99JB2	IPI00334190	IPI:IPI00334190.4|SWISS-PROT:Q9UJZ1|ENSEMBL:ENSP00000348886|REFSEQ:NP_038470|H-INV:HIT000270914|VEGA:OTTHUMP00000021320;OTTHUMP00000045386 Tax_Id=9606 Gene_Symbol=STOML2 Stomatin-like protein 2	Q9UJZ1		3	2	2	2	YES
ab16moc_312	YES	YES	Gnai3	MGI:95773	GNAI3	HGNC:4387	ENSMUSG00000000001	ENSG00000065135	14679	2773	Cluster 72	Gnai3	GNAI3	IPI00338854	IPI:IPI00338854.3|SWISS-PROT:Q9DC51|TREMBL:A2AE36;Q3TJH1|ENSEMBL:ENSMUSP00000000001|REFSEQ:NP_034436|VEGA:OTTMUSP00000007641 Tax_Id=10090 Gene_Symbol=Gnai3 Guanine nucleotide-binding protein G	Q9DC51	IPI00220578	IPI:IPI00220578.3|SWISS-PROT:P08754|TREMBL:Q5TZX1|ENSEMBL:ENSP00000358867|REFSEQ:NP_006487|H-INV:HIT000195175|VEGA:OTTHUMP00000013368;OTTHUMP00000059485 Tax_Id=9606 Gene_Symbol=GNAI3 Guanine nucleotide-binding protein G	P08754		15	11	12	10	YES
ab16moc_317	YES	YES	Atp6v0d1	MGI:1201778	ATP6V0D1	HGNC:13724	ENSMUSG00000013160	ENSG00000159720	11972	9114	Cluster 246	Atp6v0d1	ATP6V0D1	IPI00313841	IPI:IPI00313841.1|SWISS-PROT:P51863|TREMBL:Q921S5|ENSEMBL:ENSMUSP00000013304|REFSEQ:NP_038505 Tax_Id=10090 Gene_Symbol=Atp6v0d1 Vacuolar ATP synthase subunit d 1	P51863	IPI00034159	IPI:IPI00034159.1|SWISS-PROT:P61421|ENSEMBL:ENSP00000290949|REFSEQ:NP_004682|H-INV:HIT000034029|VEGA:OTTHUMP00000041804;OTTHUMP00000080169;OTTHUMP00000174810 Tax_Id=9606 Gene_Symbol=ATP6V0D1 Vacuolar ATP synthase subunit d 1	P61421		15	13	13	11	YES	YES
ab16moc_898	YES	YES	Vps35	MGI:1890467	VPS35	HGNC:13487	ENSMUSG00000031696	ENSG00000069329	65114	55737	Cluster 1190	Vps35	VPS35	IPI00111181	IPI:IPI00111181.1|SWISS-PROT:Q9EQH3|TREMBL:Q3TJ43;Q3TKU6;Q3TRJ1;Q3TUV7;Q3UQJ1|ENSEMBL:ENSMUSP00000034131|REFSEQ:NP_075373 Tax_Id=10090 Gene_Symbol=Vps35 Vacuolar protein sorting-associated protein 35	Q9EQH3	IPI00018931	IPI:IPI00018931.6|SWISS-PROT:Q96QK1|TREMBL:Q53FR4;Q5HYM2|ENSEMBL:ENSP00000299138|REFSEQ:NP_060676|H-INV:HIT000072918|VEGA:OTTHUMP00000081661;OTTHUMP00000108637;OTTHUMP00000163364 Tax_Id=9606 Gene_Symbol=VPS35 Vacuolar protein sorting-associated protein 35	Q96QK1		4	1	2	4		YES
ab16moc_824	YES	YES	Suclg1	MGI:1927234	SUCLG1	HGNC:11449	ENSMUSG00000052738	ENSG00000163541	56451	8802	Cluster 824	Suclg1	SUCLG1	IPI00406442	IPI:IPI00406442.2|SWISS-PROT:Q9WUM5|ENSEMBL:ENSMUSP00000065113|REFSEQ:NP_063932 Tax_Id=10090 Gene_Symbol=Suclg1 Succinyl-CoA ligase [GDP-forming] subunit alpha, mitochondrial precursor	Q9WUM5	IPI00759493	IPI:IPI00759493.3|SWISS-PROT:P53597|TREMBL:Q6IAL5|ENSEMBL:ENSP00000295783|REFSEQ:NP_003840|H-INV:HIT000301348|VEGA:OTTHUMP00000160494 Tax_Id=9606 Gene_Symbol=SUCLG1 succinate-CoA ligase, GDP-forming, alpha subunit	P53597		5	3	1	2
ab16moc_704	YES	YES	D10Wsu52e	MGI:106379	C22orf28	HGNC:26935	ENSMUSG00000001783	ENSG00000100220	28088	51493	Cluster 948	D10Wsu52e	D10WSU52E	IPI00116850	IPI:IPI00116850.3|SWISS-PROT:Q99LF4|TREMBL:Q3TJ01|ENSEMBL:ENSMUSP00000001834|REFSEQ:NP_663397 Tax_Id=10090 Gene_Symbol=D10Wsu52e UPF0027 protein C22orf28 homolog	Q99LF4	IPI00550689	IPI:IPI00550689.3|SWISS-PROT:Q9Y3I0|ENSEMBL:ENSP00000216038|REFSEQ:NP_055121|H-INV:HIT000037644|VEGA:OTTHUMP00000028639;OTTHUMP00000108907 Tax_Id=9606 Gene_Symbol=C22orf28 UPF0027 protein C22orf28	Q9Y3I0		6	5	5	5	YES
ab16moc_1317	YES	YES	Vps29	MGI:1928344	VPS29	HGNC:14340	ENSMUSG00000029462	ENSG00000111237	56433	51699	Cluster 1327	Vps29	VPS29	IPI00136936	IPI:IPI00136936.1|SWISS-PROT:Q9QZ88-1|ENSEMBL:ENSMUSP00000031418|REFSEQ:NP_062754 Tax_Id=10090 Gene_Symbol=Vps29 Isoform 1 of Vacuolar protein sorting-associated protein 29	Q9QZ88	IPI00170796	IPI:IPI00170796.1|SWISS-PROT:Q9UBQ0-1|TREMBL:Q5JPE4|REFSEQ:NP_057310|VEGA:OTTHUMP00000169186 Tax_Id=9606 Gene_Symbol=VPS29 Isoform 1 of Vacuolar protein sorting-associated protein 29	Q9UBQ0		2	2
ab16moc_376	YES	YES	Rpl14	MGI:1914365	RPL14	HGNC:10305	ENSMUSG00000025794	ENSG00000188846	67115	9045	Cluster 122	Rpl14	RPL14	IPI00133185	IPI:IPI00133185.3|SWISS-PROT:Q9CR57|TREMBL:Q569Z0;Q922F9|ENSEMBL:ENSMUSP00000077118|REFSEQ:NP_080250 Tax_Id=10090 Gene_Symbol=Rpl14 60S ribosomal protein L14	Q9CR57	IPI00002821	IPI:IPI00002821.4|SWISS-PROT:P50914 Tax_Id=9606 Gene_Symbol=RPL14 60S ribosomal protein L14	P50914		13	10	12	8	YES	YES
ab16moc_1049	YES	YES	Evl	MGI:1194884	EVL	HGNC:20234	ENSMUSG00000021262	ENSG00000196405	14026	51466	Cluster 1008	Evl	EVL	IPI00311253	IPI:IPI00311253.5|SWISS-PROT:P70429-2|TREMBL:Q6PB99|ENSEMBL:ENSMUSP00000076916|REFSEQ:NP_031991 Tax_Id=10090 Gene_Symbol=Evl Isoform 1 of Ena/VASP-like protein	P70429	IPI00109256	IPI:IPI00109256.4|SWISS-PROT:P70429-1|ENSEMBL:ENSMUSP00000021689|REFSEQ:XP_984420 Tax_Id=10090 Gene_Symbol=Evl Isoform 2 of Ena/VASP-like protein	P70429		3		2	3		YES
ab16moc_416	YES	YES	Numbl	MGI:894702	NUMBL	HGNC:8061	ENSMUSG00000063160	ENSG00000105245	18223	9253	Cluster 685	Numbl	NUMBL	IPI00280984	IPI:IPI00280984.5|SWISS-PROT:O08919 Tax_Id=10090 Gene_Symbol=Numbl Numb-like protein	O08919	IPI00002560	IPI:IPI00002560.1|SWISS-PROT:Q9Y6R0|TREMBL:Q9Y4I7|ENSEMBL:ENSP00000252891|REFSEQ:NP_004747|H-INV:HIT000062300|VEGA:OTTHUMP00000042059;OTTHUMP00000077745;OTTHUMP00000077746 Tax_Id=9606 Gene_Symbol=NUMBL Numb-like protein	Q9Y6R0		12	9	6	9	YES
ab16moc_808	YES	YES	Nme1	MGI:97355	NME1	HGNC:7849	ENSMUSG00000037601	NOT_FOUND	18102	4830	Cluster 219	Nme1	NME1	IPI00131459	IPI:IPI00131459.1|SWISS-PROT:P15532|TREMBL:Q5NC81|ENSEMBL:ENSMUSP00000021220|REFSEQ:NP_032730|VEGA:OTTMUSP00000001440 Tax_Id=10090 Gene_Symbol=Nme1 Nucleoside diphosphate kinase A	P15532	IPI00604590	IPI:IPI00604590.3|TREMBL:Q32Q12|VEGA:OTTHUMP00000174726 Tax_Id=9606 Gene_Symbol=NME1 NME1-NME2 protein	Q32Q12		5	5	3	3	YES	YES
ab16moc_660	YES	YES	Ampd2	MGI:88016	AMPD2	HGNC:469	ENSMUSG00000027889	ENSG00000116337	109674	271	Cluster 1321	Ampd2	AMPD2	IPI00623834	IPI:IPI00623834.1|TREMBL:A2AE27|VEGA:OTTMUSP00000007622 Tax_Id=10090 Gene_Symbol=Ampd2 Adenosine monophosphate deaminase 2	A2AE27	IPI00745772	IPI:IPI00745772.1|SWISS-PROT:Q01433-1|ENSEMBL:ENSP00000256578|REFSEQ:NP_004028 Tax_Id=9606 Gene_Symbol=AMPD2 Isoform Ex1B-2-3 of AMP deaminase 2	Q01433		7	4	5	5	YES
ab16moc_959	YES	YES	Rpl3	MGI:1351605	RPL3	HGNC:10332	ENSMUSG00000060036	ENSG00000100316	27367	6122	Cluster 1158	Rpl3	RPL3	IPI00321170	IPI:IPI00321170.8|SWISS-PROT:P27659|TREMBL:Q3T9U9;Q3U9L3;Q3UB15;Q3UB67;Q3UB90|REFSEQ:NP_038790 Tax_Id=10090 Gene_Symbol=Rpl3 60S ribosomal protein L3	P27659	IPI00550021	IPI:IPI00550021.4|SWISS-PROT:P39023|TREMBL:Q96QL0|ENSEMBL:ENSP00000346001|REFSEQ:NP_000958|H-INV:HIT000035692|VEGA:OTTHUMP00000028935 Tax_Id=9606 Gene_Symbol=RPL3 60S ribosomal protein L3	P39023		4	1	2	4
ab16moc_207	YES	YES	Mbp	MGI:96925	MBP	HGNC:6925	ENSMUSG00000041607	ENSG00000197971	17196	4155	Cluster 8	Mbp	MBP	IPI00223377	IPI:IPI00223377.1|SWISS-PROT:P04370-4|ENSEMBL:ENSMUSP00000053495|REFSEQ:NP_001020422|VEGA:OTTMUSP00000017520 Tax_Id=10090 Gene_Symbol=Mbp Isoform 4 of Myelin basic protein	P04370	IPI00223378	IPI:IPI00223378.1|SWISS-PROT:P04370-5|ENSEMBL:ENSMUSP00000099876|REFSEQ:NP_001020426|VEGA:OTTMUSP00000017519 Tax_Id=10090 Gene_Symbol=Mbp Isoform 5 of Myelin basic protein	P04370		21	20	17	15	YES	YES
ab16moc_894	YES	YES	Gpi1	MGI:95797	GPI	HGNC:4458	ENSMUSG00000036427	ENSG00000105220	14751	2821	Cluster 560	Gpi	GPI	IPI00228633	IPI:IPI00228633.7|SWISS-PROT:P06745|ENSEMBL:ENSMUSP00000049355|REFSEQ:NP_032181|VEGA:OTTMUSP00000008735 Tax_Id=10090 Gene_Symbol=Gpi1 Glucose-6-phosphate isomerase	P06745	IPI00027497	IPI:IPI00027497.5|SWISS-PROT:P06744|TREMBL:Q9BRD3|ENSEMBL:ENSP00000348877|REFSEQ:NP_000166|H-INV:HIT000049155|VEGA:OTTHUMP00000068114;OTTHUMP00000076759 Tax_Id=9606 Gene_Symbol=GPI Glucose-6-phosphate isomerase	P06744		4	2	4	2	YES	YES
ab16moc_264	YES	YES	Rpl7	MGI:98073	RPL7	HGNC:10363	ENSMUSG00000043716	ENSG00000214485	19989	6129	Cluster 165	Rpl7	RPL7	IPI00311236	IPI:IPI00311236.1|SWISS-PROT:P14148|TREMBL:Q3UBI6;Q5M9N8|ENSEMBL:ENSMUSP00000071616|REFSEQ:NP_035421|VEGA:OTTMUSP00000018402 Tax_Id=10090 Gene_Symbol=Rpl7 60S ribosomal protein L7	P14148	IPI00472171	IPI:IPI00472171.2|TREMBL:Q3KQU0|VEGA:OTTHUMP00000177751 Tax_Id=9606 Gene_Symbol=RPL7 RPL7 protein	Q3KQU0		18	16	14	12	YES	YES
ab16moc_335	YES	YES	Hsp90aa1	MGI:96250	HSP90AA1	HGNC:5253	ENSMUSG00000021270	ENSG00000080824	15519	3320	Cluster 269	Hsp90aa1	HSP90AA1	IPI00330804	IPI:IPI00330804.4|SWISS-PROT:P07901|TREMBL:A0PJ91;Q3TJU7;Q3TKA2;Q3TKB9;Q3TKG0;Q3UIF3;Q80Y52;Q8C2A9;Q8C5U3|ENSEMBL:ENSMUSP00000021698|REFSEQ:NP_034610|VEGA:OTTMUSP00000021333;OTTMUSP00000021334 Tax_Id=10090 Gene_Symbol=Hsp90aa1 Heat shock protein HSP 90-al	P07901	IPI00784295	IPI:IPI00784295.2|SWISS-PROT:P07900|TREMBL:Q2VPJ6;Q5CAQ6;Q8TBA7;Q96HX7|ENSEMBL:ENSP00000216281|REFSEQ:NP_005339|H-INV:HIT000321491|VEGA:OTTHUMP00000041670 Tax_Id=9606 Gene_Symbol=HSP90AA1 Heat shock protein HSP 90-alpha	P07900		14	10	8	7	YES	YES
ab16moc_383	YES	YES	Hsp90ab1	MGI:96247	HSP90AB1	HGNC:5258	ENSMUSG00000023944	ENSG00000205527	15516	3326	Cluster 293	Hsp90ab1	HSP90AB1	IPI00229080	IPI:IPI00229080.7|TREMBL:Q71LX8;Q80YC2;Q811H6|ENSEMBL:ENSMUSP00000024739|REFSEQ:NP_032328|VEGA:OTTMUSP00000021764 Tax_Id=10090 Gene_Symbol=Hsp90ab1 Heat shock protein 84b	Q71LX8	IPI00414676	IPI:IPI00414676.6|SWISS-PROT:P08238|TREMBL:Q6PK50;Q9H6X9|ENSEMBL:ENSP00000325875;ENSP00000360574;ENSP00000360609;ENSP00000360709|REFSEQ:NP_031381|H-INV:HIT000253179|VEGA:OTTHUMP00000016517;OTTHUMP00000016518;OTTHUMP00000016519;OTTHUMP00000039869 Tax_Id=96	P08238		12	11	6	9	YES	YES
ab16moc_250	YES	YES	Dnm2	MGI:109547	DNM2	HGNC:2974	ENSMUSG00000033335	ENSG00000079805	13430	1785	Cluster 323	Dnm2	DNM2	IPI00749677	IPI:IPI00749677.2|TREMBL:Q3TBU6;Q3TCR7;Q91Z39;Q9CUM4|ENSEMBL:ENSMUSP00000072199|REFSEQ:NP_001034609 Tax_Id=10090 Gene_Symbol=Dnm2 NOD-derived CD11c +ve dendritic cells cDNA, RIKEN full-length enriched library, clone:F630221B07 product:dynamin 2, full inse	Q3TBU6	IPI00514550	IPI:IPI00514550.1|TREMBL:Q8N1K8|REFSEQ:NP_001005361|VEGA:OTTHUMP00000076397 Tax_Id=9606 Gene_Symbol=DNM2 dynamin 2 isoform 2	Q8N1K8		18	12	12	13	YES	YES
ab16moc_24	YES	YES	Dnm1	MGI:107384	DNM1	HGNC:2972	ENSMUSG00000026825	ENSG00000106976	13429	1759	Cluster 18	Dnm1	DNM1	IPI00465648	IPI:IPI00465648.3|SWISS-PROT:P39053-3|ENSEMBL:ENSMUSP00000077461|VEGA:OTTMUSP00000013921 Tax_Id=10090 Gene_Symbol=Dnm1 Isoform 3 of Dynamin-1	P39053	IPI00657691	IPI:IPI00657691.2|TREMBL:Q5SYX0|VEGA:OTTHUMP00000022237 Tax_Id=9606 Gene_Symbol=DNM1 Dynamin 1	Q5SYX0		62	44	51	44	YES	YES
ab16moc_111	YES	YES	Atp6v1e1	MGI:894326	ATP6V1E1	HGNC:857	ENSMUSG00000019210	ENSG00000131100	11973	529	Cluster 5	Atp6v1e1	ATP6V1E1	IPI00119115	IPI:IPI00119115.2|SWISS-PROT:P50518|ENSEMBL:ENSMUSP00000019354|REFSEQ:NP_031536 Tax_Id=10090 Gene_Symbol=Atp6v1e1 Vacuolar ATP synthase subunit E 1	P50518	IPI00003856	IPI:IPI00003856.1|SWISS-PROT:P36543|TREMBL:Q53Y06|ENSEMBL:ENSP00000253413|REFSEQ:NP_001687|H-INV:HIT000283919|VEGA:OTTHUMP00000065606;OTTHUMP00000065607 Tax_Id=9606 Gene_Symbol=ATP6V1E1 Vacuolar ATP synthase subunit E 1	P36543		33	27	25	22	YES	YES
ab16moc_638	YES	YES	Atp6v1e2	MGI:1922165	ATP6V1E2	HGNC:18125	ENSMUSG00000053375	ENSG00000171142	74915	90423	Cluster 504	Atp6v1e2	ATP6V1E2	IPI00377443	IPI:IPI00377443.3|SWISS-PROT:Q9D593|ENSEMBL:ENSMUSP00000065285|REFSEQ:NP_083397 Tax_Id=10090 Gene_Symbol=Atp6v1e2 Vacuolar ATP synthase subunit E 2	Q9D593	IPI00059139	IPI:IPI00059139.1|SWISS-PROT:Q96A05|ENSEMBL:ENSP00000304891;ENSP00000367656|REFSEQ:NP_542384|H-INV:HIT000301802|VEGA:OTTHUMP00000159034 Tax_Id=9606 Gene_Symbol=ATP6V1E2 Vacuolar ATP synthase subunit E 2	Q96A05		7	5	2	4	YES
ab16moc_1314	YES	YES	Gpx4	MGI:104767	GPX4	HGNC:4556	ENSMUSG00000075706	ENSG00000167468	625249	2879	Cluster 1272	Gpx4	GPX4	IPI00117281	IPI:IPI00117281.1|SWISS-PROT:O70325-1|TREMBL:Q3TIF2;Q5XJZ8|REFSEQ:NP_032188|VEGA:OTTMUSP00000020605 Tax_Id=10090 Gene_Symbol=Gpx4 Isoform Mitochondrial of Phospholipid hydroperoxide glutathione peroxidase, mitochondrial precursor	O70325	IPI00304814	IPI:IPI00304814.3|SWISS-PROT:P36969-1|TREMBL:Q6PI42|REFSEQ:NP_002076|VEGA:OTTHUMP00000064905 Tax_Id=9606 Gene_Symbol=GPX4 Isoform Mitochondrial of Phospholipid hydroperoxide glutathione peroxidase, mitochondrial precursor	P36969		2	1	2
ab16moc_1308	YES	YES	Rps27	MGI:1888676	RPS27	HGNC:10416	ENSMUSG00000050621	ENSG00000177954	57294	6232	Cluster 707	Rps27	RPS27	IPI00173160	IPI:IPI00173160.3|SWISS-PROT:Q6ZWU9|ENSEMBL:ENSMUSP00000060523|REFSEQ:NP_081291 Tax_Id=10090 Gene_Symbol=Rps27 40S ribosomal protein S27	Q6ZWU9	IPI00513971	IPI:IPI00513971.5|SWISS-PROT:P42677|TREMBL:Q5T4L6|ENSEMBL:ENSP00000252325;ENSP00000357555|REFSEQ:NP_001021|H-INV:HIT000264177|VEGA:OTTHUMP00000034760;OTTHUMP00000059844 Tax_Id=9606 Gene_Symbol=RPS27 40S ribosomal protein S27	P42677		2	1	2	2		YES
ab16moc_593	YES	YES	Rpl23a	MGI:3040672	RPL23A	HGNC:10317	ENSMUSG00000058546	ENSG00000198242	268449	6147	Cluster 173	Rpl23a	RPL23A	IPI00461456	IPI:IPI00461456.1|SWISS-PROT:P62751|TREMBL:Q4V9X9;Q5M9M5;Q91YK6|ENSEMBL:ENSMUSP00000078397;ENSMUSP00000099541|REFSEQ:NP_997406|VEGA:OTTMUSP00000000140 Tax_Id=10090 Gene_Symbol=Rpl23a 60S ribosomal protein L23a	P62751	IPI00021266	IPI:IPI00021266.1|SWISS-PROT:P62750|ENSEMBL:ENSP00000347969|REFSEQ:NP_000975|H-INV:HIT000259830|VEGA:OTTHUMP00000163536;OTTHUMP00000180869 Tax_Id=9606 Gene_Symbol=RPL23A 60S ribosomal protein L23a	P62750		8	7	5	7	YES
ab16moc_496	YES	YES	Aldoc	MGI:101863	ALDOC	HGNC:418	ENSMUSG00000017390	ENSG00000109107	11676	230	Cluster 98	Aldoc	ALDOC	IPI00119458	IPI:IPI00119458.7|SWISS-PROT:P05063|TREMBL:Q5SYM1|ENSEMBL:ENSMUSP00000017534;ENSMUSP00000099536;ENSMUSP00000099537|REFSEQ:NP_033787|VEGA:OTTMUSP00000000160;OTTMUSP00000000161 Tax_Id=10090 Gene_Symbol=Aldoc Fructose-bisphosphate aldolase C	P05063	IPI00418262	IPI:IPI00418262.4|SWISS-PROT:P09972|TREMBL:Q3SYL3;Q6FH94|ENSEMBL:ENSP00000226253|REFSEQ:NP_005156|H-INV:HIT000289368|VEGA:OTTHUMP00000041858;OTTHUMP00000041860;OTTHUMP00000163435;OTTHUMP00000163437;OTTHUMP00000181000 Tax_Id=9606 Gene_Symbol=ALDOC Fructose	P09972		9		3	6		YES
ab16moc_94	YES	YES	Aldoa	MGI:87994	ALDOA	HGNC:414	ENSMUSG00000030695	ENSG00000149925	11674	226	Cluster 21	Aldoa	ALDOA	IPI00221402	IPI:IPI00221402.7|SWISS-PROT:P05064|TREMBL:Q5FWB7;Q6NY00|ENSEMBL:ENSMUSP00000032934|REFSEQ:NP_031464 Tax_Id=10090 Gene_Symbol=Aldoa Fructose-bisphosphate aldolase A	P05064	IPI00465439	IPI:IPI00465439.5|SWISS-PROT:P04075|TREMBL:A4UCS9;A4UCT0;Q6FI10;Q9UCN2|ENSEMBL:ENSP00000336927|REFSEQ:NP_000025;NP_908930;NP_908932|H-INV:HIT000031868|VEGA:OTTHUMP00000041783;OTTHUMP00000041786;OTTHUMP00000041787;OTTHUMP00000041789;OTTHUMP00000080131;OTTH	P04075		35	27	31	25	YES	YES
ab16moc_820	YES	YES	Pycrl	MGI:1913444	PYCRL	HGNC:25846	ENSMUSG00000022571	ENSG00000104524	66194	65263	Cluster 676	Pycrl	PYCRL	IPI00153234	IPI:IPI00153234.2|TREMBL:Q8R0P9;Q9DCC4|ENSEMBL:ENSMUSP00000049605|REFSEQ:NP_079688 Tax_Id=10090 Gene_Symbol=Pycrl pyrroline-5-carboxylate reductase-like	Q8R0P9	IPI00646105	IPI:IPI00646105.3|TREMBL:Q8N3N9;Q96HX4;Q9H896|ENSEMBL:ENSP00000220966|REFSEQ:NP_075566|H-INV:HIT000003974|VEGA:OTTHUMP00000178409 Tax_Id=9606 Gene_Symbol=PYCRL Pyrroline-5-carboxylate reductase-like	Q8N3N9		5	3	4	3	YES	YES
ab16moc_446	YES	YES	Ppp1cb	MGI:104871	PPP1CB	HGNC:9282	ENSMUSG00000014956	ENSG00000213639	19046	5500	Cluster 210	Ppp1cb	PPP1CB	IPI00311873	IPI:IPI00311873.5|SWISS-PROT:P62141|TREMBL:Q3TBE5;Q3TL90;Q542E7;Q8C285;Q9DBY2|ENSEMBL:ENSMUSP00000015100;ENSMUSP00000069836|REFSEQ:NP_766295 Tax_Id=10090 Gene_Symbol=Ppp1cb Serine/threonine-protein phosphatase PP1-beta catalytic subunit	P62141	IPI00218236	IPI:IPI00218236.6|SWISS-PROT:P62140|ENSEMBL:ENSP00000351298|REFSEQ:NP_002700;NP_996759|H-INV:HIT000056617|VEGA:OTTHUMP00000041116 Tax_Id=9606 Gene_Symbol=PPP1CB Serine/threonine-protein phosphatase PP1-beta catalytic subunit	P62140		11	4	8	11	YES	YES
ab16moc_444	YES	YES	Atp6v1d	MGI:1921084	ATP6V1D	HGNC:13527	ENSMUSG00000021114	ENSG00000100554	73834	51382	Cluster 151	Atp6v1d	ATP6V1D	IPI00118787	IPI:IPI00118787.1|SWISS-PROT:P57746|TREMBL:Q3U684;Q3U861;Q3UJH5;Q3UK81;Q9CTI8|ENSEMBL:ENSMUSP00000021536|REFSEQ:NP_076210 Tax_Id=10090 Gene_Symbol=Atp6v1d Vacuolar ATP synthase subunit D	P57746	IPI00001568	IPI:IPI00001568.1|SWISS-PROT:Q9Y5K8|TREMBL:Q6PJ05;Q8N5Z9;Q9H3H0|ENSEMBL:ENSP00000216442|REFSEQ:NP_057078|H-INV:HIT000298564|VEGA:OTTHUMP00000028402;OTTHUMP00000065551;OTTHUMP00000065552 Tax_Id=9606 Gene_Symbol=ATP6V1D Vacuolar ATP synthase subunit D	Q9Y5K8		11	9	7	7	YES	YES
ab16moc_639	YES	YES	Rps19	MGI:1333780	RPS19	HGNC:10402	ENSMUSG00000040952	ENSG00000105372	20085	6223	Cluster 218	Rps19	RPS19	IPI00113241	IPI:IPI00113241.7|SWISS-PROT:Q9CZX8|TREMBL:Q5M9P3|ENSEMBL:ENSMUSP00000048491|REFSEQ:NP_075622 Tax_Id=10090 Gene_Symbol=Rps19 40S ribosomal protein S19	Q9CZX8	IPI00215780	IPI:IPI00215780.5|SWISS-PROT:P39019|TREMBL:Q8WVX7|ENSEMBL:ENSP00000221975|REFSEQ:NP_001013|H-INV:HIT000038368|VEGA:OTTHUMP00000068715;OTTHUMP00000077988 Tax_Id=9606 Gene_Symbol=RPS19 40S ribosomal protein S19	P39019		7	6	3	5	YES	YES
ab16moc_580	YES	YES	Rpl13	MGI:105922	RPL13	HGNC:10303	ENSMUSG00000000740	ENSG00000167526	270106	6137	Cluster 330	Rpl13	RPL13	IPI00224505	IPI:IPI00224505.7|SWISS-PROT:P47963|ENSEMBL:ENSMUSP00000000756;ENSMUSP00000081970|REFSEQ:NP_058018|VEGA:OTTMUSP00000017746 Tax_Id=10090 Gene_Symbol=Rpl13 60S ribosomal protein L13	P47963	IPI00465361	IPI:IPI00465361.4|SWISS-PROT:P26373|TREMBL:O60250;Q567Q8;Q6NZ55|ENSEMBL:ENSP00000307889|REFSEQ:NP_000968;NP_150254|H-INV:HIT000047452|VEGA:OTTHUMP00000081450;OTTHUMP00000081451;OTTHUMP00000107331;OTTHUMP00000165255;OTTHUMP00000165256 Tax_Id=9606 Gene_Symb	P26373		8	7	6	6	YES
ab16moc_348	YES	YES	Cs	MGI:88529	CS	HGNC:2422	ENSMUSG00000005683	ENSG00000062485	12974	1431	Cluster 454	Cs	CS	IPI00113141	IPI:IPI00113141.1|SWISS-PROT:Q9CZU6|TREMBL:Q0QEL9|ENSEMBL:ENSMUSP00000005826|REFSEQ:NP_080720 Tax_Id=10090 Gene_Symbol=Cs Citrate synthase, mitochondrial precursor	Q9CZU6	IPI00025366	IPI:IPI00025366.4|SWISS-PROT:O75390|ENSEMBL:ENSP00000342056|REFSEQ:NP_004068|VEGA:OTTHUMP00000082833;OTTHUMP00000168096 Tax_Id=9606 Gene_Symbol=CS Citrate synthase, mitochondrial precursor	O75390		14	11	8	13	YES	YES
ab16moc_1322	YES	YES	Rps15a	MGI:2389091	RPS15A	HGNC:10389	ENSMUSG00000008683	ENSG00000134419	267019	6210	Cluster 726	Rps15a	RPS15A	IPI00230660	IPI:IPI00230660.5|SWISS-PROT:P62245|TREMBL:Q5M9M4|ENSEMBL:ENSMUSP00000063998|REFSEQ:NP_733769 Tax_Id=10090 Gene_Symbol=Rps15a 40S ribosomal protein S15a	P62245	IPI00221091	IPI:IPI00221091.9|SWISS-PROT:P62244|ENSEMBL:ENSP00000318646|REFSEQ:NP_001010;NP_001025180|H-INV:HIT000050238|VEGA:OTTHUMP00000081453;OTTHUMP00000081454;OTTHUMP00000108329;OTTHUMP00000162054 Tax_Id=9606 Gene_Symbol=RPS15A 40S ribosomal protein S15a	P62244		2	2	2	2	YES
ab16moc_517	YES	YES	Ndufv1	MGI:107851	NDUFV1	HGNC:7716	ENSMUSG00000037916	ENSG00000167792	17995	4723	Cluster 714	Ndufv1	NDUFV1	IPI00130460	IPI:IPI00130460.1|SWISS-PROT:Q91YT0|ENSEMBL:ENSMUSP00000042967|REFSEQ:NP_598427 Tax_Id=10090 Gene_Symbol=Ndufv1 NADH dehydrogenase [ubiquinone] flavoprotein 1, mitochondrial precursor	Q91YT0	IPI00221298	IPI:IPI00221298.1|SWISS-PROT:P49821-2 Tax_Id=9606 Gene_Symbol=NDUFV1 Isoform 2 of NADH dehydrogenase [ubiquinone] flavoprotein 1, mitochondrial precursor	P49821		9	5	6	5	YES
ab16moc_1245	YES	YES	Gdi1	MGI:99846	GDI1	HGNC:4226	ENSMUSG00000015291	ENSG00000203879	14567	2664	Cluster 177	Gdi1	GDI1	IPI00323179	IPI:IPI00323179.3|SWISS-PROT:P50396|ENSEMBL:ENSMUSP00000015435|REFSEQ:NP_034403|VEGA:OTTMUSP00000019266 Tax_Id=10090 Gene_Symbol=Gdi1 Rab GDP dissociation inhibitor alpha	P50396	IPI00010154	IPI:IPI00010154.3|SWISS-PROT:P31150|TREMBL:Q6FG50|ENSEMBL:ENSP00000358756|REFSEQ:NP_001484|VEGA:OTTHUMP00000032118;OTTHUMP00000108777 Tax_Id=9606 Gene_Symbol=GDI1 Rab GDP dissociation inhibitor alpha	P31150		2	1	2	1		YES
ab16moc_1042	YES	YES	Sucla2	MGI:1306775	SUCLA2	HGNC:11448	ENSMUSG00000022110	ENSG00000136143	20916	8803	Cluster 755	Sucla2	SUCLA2	IPI00261627	IPI:IPI00261627.1|SWISS-PROT:Q9Z2I9|TREMBL:Q05BC6;Q3U6C7;Q3UCC6;Q9CTE2|ENSEMBL:ENSMUSP00000022706|REFSEQ:NP_035636 Tax_Id=10090 Gene_Symbol=Sucla2 Succinyl-CoA ligase [ADP-forming] beta-chain, mitochondrial precursor	Q9Z2I9	IPI00217232	IPI:IPI00217232.2|SWISS-PROT:Q9P2R7-2|TREMBL:Q5T9Q6;Q7Z503|ENSEMBL:ENSP00000367912|VEGA:OTTHUMP00000018381;OTTHUMP00000018385 Tax_Id=9606 Gene_Symbol=SUCLA2 Isoform 2 of Succinyl-CoA ligase [ADP-forming] beta-chain, mitochondrial precursor	Q9P2R7		3	1	1	3		YES
ab16moc_893	YES	YES	Pkm2	MGI:97591	PKM2	HGNC:9021	ENSMUSG00000032294	ENSG00000067225	18746	5315	Cluster 154	Pkm2	PKM2	IPI00845840	IPI:IPI00845840.1|SWISS-PROT:P52480-2 Tax_Id=10090 Gene_Symbol=Pkm2 Isoform M1 of Pyruvate kinase isozymes M1/M2	P52480	IPI00220644	IPI:IPI00220644.8|SWISS-PROT:P14618-2|ENSEMBL:ENSP00000373742;ENSP00000373743;ENSP00000373745|REFSEQ:NP_872270;NP_872271|VEGA:OTTHUMP00000043776;OTTHUMP00000043777;OTTHUMP00000176445 Tax_Id=9606 Gene_Symbol=PKM2 Isoform M1 of Pyruvate kinase isozymes M1/M	P14618		4	3	3	3	YES	YES
ab16moc_298	YES	YES	Cacnb4	MGI:103301	CACNB4	HGNC:1404	ENSMUSG00000017412	ENSG00000182389	12298	785	Cluster 450	Cacnb4	CACNB4	IPI00626660	IPI:IPI00626660.3|SWISS-PROT:Q8R0S4-3|TREMBL:A2ARR1;Q3TYI5|ENSEMBL:ENSMUSP00000077438;ENSMUSP00000099822|REFSEQ:NP_001032176|VEGA:OTTMUSP00000013519 Tax_Id=10090 Gene_Symbol=Cacnb4 Isoform 3 of Voltage-dependent L-type calcium channel subunit beta-4	Q8R0S4	IPI00792551	IPI:IPI00792551.1|TREMBL:Q53S65;Q580I4|VEGA:OTTHUMP00000164899 Tax_Id=9606 Gene_Symbol=CACNB4 Hypothetical protein CACNB4	Q53S65		16	14	12	12	YES	YES
ab16moc_418	YES	YES	Cacnb3	MGI:103307	CACNB3	HGNC:1403	ENSMUSG00000003352	ENSG00000167535	12297	784	Cluster 557	Cacnb3	CACNB3	IPI00788326	IPI:IPI00788326.1|TREMBL:Q8K5A7|ENSEMBL:ENSMUSP00000003442|REFSEQ:NP_031607 Tax_Id=10090 Gene_Symbol=Cacnb3 calcium channel, voltage-dependent, beta 3 subunit isoform 1	Q8K5A7	IPI00031790	IPI:IPI00031790.2|SWISS-PROT:P54284-2|VEGA:OTTHUMP00000041590;OTTHUMP00000167290 Tax_Id=9606 Gene_Symbol=CACNB3 Isoform 3B of Voltage-dependent L-type calcium channel subunit beta-3	P54284		12	10	8	10	YES
ab16moc_485	YES	YES	Cacnb1	MGI:102522	CACNB1	HGNC:1401	ENSMUSG00000020882	ENSG00000067191	12295	782	Cluster 832	Cacnb1	CACNB1	IPI00321850	IPI:IPI00321850.3|SWISS-PROT:Q8R3Z5-1|TREMBL:A2A543|ENSEMBL:ENSMUSP00000017552;ENSMUSP00000099433|REFSEQ:NP_660099|VEGA:OTTMUSP00000002817 Tax_Id=10090 Gene_Symbol=Cacnb1 Isoform 1 of Voltage-dependent L-type calcium channel subunit beta-1	Q8R3Z5	IPI00219984	IPI:IPI00219984.1|SWISS-PROT:Q02641-3|TREMBL:Q6TME4|REFSEQ:NP_954856|VEGA:OTTHUMP00000041883 Tax_Id=9606 Gene_Symbol=CACNB1 Isoform 3 of Voltage-dependent L-type calcium channel subunit beta-1	Q02641		10	7	6	9	YES
ab16moc_358	YES	YES	Rps3a	MGI:1202063	RPS3A	HGNC:10421	ENSMUSG00000028081	ENSG00000178429	20091	6189	Cluster 167	Rps3a	RPS3A	IPI00331345	IPI:IPI00331345.5|SWISS-PROT:P97351|TREMBL:Q3U5P8;Q3UAC2;Q3UJU5;Q564F3;Q9D1S3|ENSEMBL:ENSMUSP00000029722|REFSEQ:NP_058655 Tax_Id=10090 Gene_Symbol=Rps3a 40S ribosomal protein S3a	P97351	IPI00472119	IPI:IPI00472119.2|ENSEMBL:ENSP00000343748|VEGA:OTTHUMP00000175846 Tax_Id=9606 Gene_Symbol=- 30 kDa protein	A6NCR2		14	10	9	5	YES
ab16moc_566	YES	YES	Cyld	MGI:1921506	CYLD	HGNC:2584	ENSMUSG00000036712	ENSG00000083799	74256	1540	Cluster 1568	Cyld	CYLD	IPI00463126	IPI:IPI00463126.1|SWISS-PROT:Q80TQ2-2 Tax_Id=10090 Gene_Symbol=Cyld Isoform 1 of Probable ubiquitin carboxyl-terminal hydrolase CYLD	Q80TQ2	IPI00106663	IPI:IPI00106663.2|SWISS-PROT:Q9NQC7-1|REFSEQ:NP_056062|H-INV:HIT000245961 Tax_Id=9606 Gene_Symbol=CYLD Isoform 1 of Probable ubiquitin carboxyl-terminal hydrolase CYLD	Q9NQC7		8	6	8	4	YES
ab16moc_541	YES	YES	Glg1	MGI:104967	GLG1	HGNC:4316	ENSMUSG00000003316	ENSG00000090863	20340	2734	Cluster 1681	Glg1	GLG1	IPI00122399	IPI:IPI00122399.1|SWISS-PROT:Q61543|TREMBL:Q3TMG0;Q53WR6;Q8BQH1|ENSEMBL:ENSMUSP00000003404|REFSEQ:NP_033175 Tax_Id=10090 Gene_Symbol=Glg1 Golgi apparatus protein 1 precursor	Q61543	IPI00641153	IPI:IPI00641153.2|SWISS-PROT:Q92896|TREMBL:Q6ZMF1|H-INV:HIT000220859|VEGA:OTTHUMP00000080683;OTTHUMP00000107687 Tax_Id=9606 Gene_Symbol=GLG1 Golgi apparatus protein 1 precursor	Q92896		9	6	6	4	YES
ab16moc_711	YES	YES	Dynll2	MGI:1915347	DYNLL2	HGNC:24596	ENSMUSG00000020483	ENSG00000121083	68097	140735	Cluster 78	Dynll2	DYNLL2	IPI00132734	IPI:IPI00132734.1|SWISS-PROT:Q9D0M5|ENSEMBL:ENSMUSP00000020775|REFSEQ:NP_080832|VEGA:OTTMUSP00000001420;OTTMUSP00000001421 Tax_Id=10090 Gene_Symbol=Dynll2 Dynein light chain 2, cytoplasmic	Q9D0M5	IPI00062037	IPI:IPI00062037.1|SWISS-PROT:Q96FJ2|ENSEMBL:ENSP00000240343|REFSEQ:NP_542408|H-INV:HIT000035065|VEGA:OTTHUMP00000181714;OTTHUMP00000181715 Tax_Id=9606 Gene_Symbol=DYNLL2 Dynein light chain 2, cytoplasmic	Q96FJ2		6	1	6	6		YES
ab16moc_719	YES	YES	Dynll1	MGI:1861457	DYNLL1	HGNC:15476	ENSMUSG00000009013	ENSG00000088986	56455	8655	Cluster 78	Dynll1	DYNLL1	IPI00121623	IPI:IPI00121623.1|SWISS-PROT:P63168|TREMBL:Q9D6F6|ENSEMBL:ENSMUSP00000009157|REFSEQ:NP_062656|VEGA:OTTMUSP00000015546;OTTMUSP00000015547 Tax_Id=10090 Gene_Symbol=Dynll1 Dynein light chain 1, cytoplasmic	P63168	IPI00019329	IPI:IPI00019329.1|SWISS-PROT:P63167|TREMBL:Q6FGH9|ENSEMBL:ENSP00000242577|REFSEQ:NP_001032583;NP_001032584;NP_003737|H-INV:HIT000269701|VEGA:OTTHUMP00000169455;OTTHUMP00000169456 Tax_Id=9606 Gene_Symbol=DYNLL1 Dynein light chain 1, cytoplasmic	P63167		6	2	6	5	YES	YES
ab16moc_1037	YES	YES	Eno2	MGI:95394	ENO2	HGNC:3353	ENSMUSG00000004267	ENSG00000111674	13807	2026	Cluster 264	Eno2	ENO2	IPI00331704	IPI:IPI00331704.7|SWISS-PROT:P17183|TREMBL:Q3UJ20;Q545V3|ENSEMBL:ENSMUSP00000004378|REFSEQ:NP_038537|VEGA:OTTMUSP00000025146 Tax_Id=10090 Gene_Symbol=Eno2 Gamma-enolase	P17183	IPI00216171	IPI:IPI00216171.3|SWISS-PROT:P09104|TREMBL:Q6FHV6|ENSEMBL:ENSP00000229277|REFSEQ:NP_001966|H-INV:HIT000031150|VEGA:OTTHUMP00000166420 Tax_Id=9606 Gene_Symbol=ENO2 Gamma-enolase	P09104		3	3	2	2	YES	YES
ab16moc_1261	YES	YES	Eno3	MGI:95395	ENO3	HGNC:3354	ENSMUSG00000060600	ENSG00000108515	13808	2027	Cluster 921	Eno3	ENO3	IPI00228548	IPI:IPI00228548.6|SWISS-PROT:P21550|TREMBL:Q4FK59;Q5SX58|ENSEMBL:ENSMUSP00000065681;ENSMUSP00000072620|REFSEQ:NP_031959|VEGA:OTTMUSP00000006349;OTTMUSP00000006350 Tax_Id=10090 Gene_Symbol=Eno3 Beta-enolase	P21550	IPI00218474	IPI:IPI00218474.5|SWISS-PROT:P13929|TREMBL:Q9NPL4|ENSEMBL:ENSP00000324105;ENSP00000370739|REFSEQ:NP_001967;NP_443739|H-INV:HIT000321704|VEGA:OTTHUMP00000125242;OTTHUMP00000182733;OTTHUMP00000182734 Tax_Id=9606 Gene_Symbol=ENO3 Beta-enolase	P13929		2			2		YES
ab16moc_339	YES	YES	Eno1	MGI:95393	ENO1	HGNC:3350	ENSMUSG00000063524	ENSG00000074800	13806	2023	Cluster 184	Eno1	ENO1	IPI00462072	IPI:IPI00462072.3|SWISS-PROT:P17182|TREMBL:Q5FW97|ENSEMBL:ENSMUSP00000075513;ENSMUSP00000079727|REFSEQ:NP_001020559|VEGA:OTTMUSP00000011140 Tax_Id=10090 Gene_Symbol=Eno1;EG433182 Alpha-enolase	P17182	IPI00465248	IPI:IPI00465248.5|SWISS-PROT:P06733-1|TREMBL:A4QMW8;A4UCS8;Q53FT9;Q53HR3;Q96GV1;Q9BT62;Q9UCG5;Q9UCH6|ENSEMBL:ENSP00000234590;ENSP00000351745|REFSEQ:NP_001419|H-INV:HIT000270987|VEGA:OTTHUMP00000001706;OTTHUMP00000044281 Tax_Id=9606 Gene_Symbol=ENO1 Isofor	P06733		14	11	10	12	YES	YES
ab16moc_589	YES	YES	Adam23	MGI:1345162	ADAM23	HGNC:202	ENSMUSG00000025964	ENSG00000114948	23792	8745	Cluster 1060	Adam23	ADAM23	IPI00650001	IPI:IPI00650001.2|TREMBL:Q5SV72|ENSEMBL:ENSMUSP00000091461|REFSEQ:XP_986705|VEGA:OTTMUSP00000002476 Tax_Id=10090 Gene_Symbol=Adam23 similar to ADAM 23 precursor	Q5SV72	IPI00021903	IPI:IPI00021903.1|SWISS-PROT:O75077-1|TREMBL:A2RU59;Q53TC0|ENSEMBL:ENSP00000264377|REFSEQ:NP_003803|H-INV:HIT000244039|VEGA:OTTHUMP00000163840 Tax_Id=9606 Gene_Symbol=ADAM23 Isoform Alpha of ADAM 23 precursor	O75077		8	6	7	8	YES
ab16moc_403	YES	YES	Atp5o	MGI:106341	ATP5O	HGNC:850	ENSMUSG00000022956	ENSG00000159186	28080	539	Cluster 97	Atp5o	ATP5O	IPI00118986	IPI:IPI00118986.1|SWISS-PROT:Q9DB20|TREMBL:Q3TF25;Q3THG0|ENSEMBL:ENSMUSP00000023677|REFSEQ:NP_613063 Tax_Id=10090 Gene_Symbol=Atp5o ATP synthase O subunit, mitochondrial precursor	Q9DB20	IPI00007611	IPI:IPI00007611.1|SWISS-PROT:P48047|TREMBL:Q53HH2|ENSEMBL:ENSP00000290299;ENSP00000370601|REFSEQ:NP_001688|H-INV:HIT000323942|VEGA:OTTHUMP00000062822;OTTHUMP00000067745 Tax_Id=9606 Gene_Symbol=ATP5O ATP synthase O subunit, mitochondrial precursor	P48047		12	11	8	11	YES	YES
ab16moc_1084	YES	YES	Pgam1	MGI:97552	PGAM1	HGNC:8888	ENSMUSG00000011752	ENSG00000186076	18648	5223	Cluster 987	hCG_2015138	PGAM1	IPI00457898	IPI:IPI00457898.3|SWISS-PROT:Q9DBJ1|TREMBL:Q3U7Z6;Q6NWV5|ENSEMBL:ENSMUSP00000011896;ENSMUSP00000083087;ENSMUSP00000088891|REFSEQ:NP_075907;XP_982590;XP_985088;XP_996466;XP_998756;XP_999028;XP_999777 Tax_Id=10090 Gene_Symbol=LOC675179;Pgam1;LOC669836;EG668	Q9DBJ1	IPI00549725	IPI:IPI00549725.6|SWISS-PROT:P18669|TREMBL:Q0D2Q6;Q53G35;Q6FHK8;Q6FHU2;Q6P6D7|ENSEMBL:ENSP00000351067;ENSP00000359991|REFSEQ:NP_002620;XP_932047;XP_947649|H-INV:HIT000271380;HIT000278221|VEGA:OTTHUMP00000020190;OTTHUMP00000059414;OTTHUMP00000168727 Tax_Id	P18669		3	3	2	2	YES	YES
ab16moc_452	YES	YES	Auh	MGI:1338011	AUH	HGNC:890	ENSMUSG00000021460	ENSG00000148090	11992	549	Cluster 245	Auh	AUH	IPI00124900	IPI:IPI00124900.1|SWISS-PROT:Q9JLZ3-1|ENSEMBL:ENSMUSP00000021913|REFSEQ:NP_057918 Tax_Id=10090 Gene_Symbol=Auh Isoform 1 of Methylglutaconyl-CoA hydratase, mitochondrial precursor	Q9JLZ3	IPI00017802	IPI:IPI00017802.1|SWISS-PROT:Q13825-1|TREMBL:Q5VYU8|ENSEMBL:ENSP00000364883|REFSEQ:NP_001689|H-INV:HIT000323781|VEGA:OTTHUMP00000021631;OTTHUMP00000063642 Tax_Id=9606 Gene_Symbol=AUH Isoform 1 of Methylglutaconyl-CoA hydratase, mitochondrial precursor	Q13825		11	8	6	9	YES
ab16moc_1294	YES	YES	Rars	MGI:1914297	RARS	HGNC:9870	ENSMUSG00000018848	ENSG00000113643	104458	5917	Cluster 2091	Rars	RARS	IPI00315488	IPI:IPI00315488.1|SWISS-PROT:Q9D0I9|TREMBL:Q3THP2;Q3TM73;Q3TVC5;Q3U8R2;Q3U930;Q3UAZ3;Q5SXA8|ENSEMBL:ENSMUSP00000018992|REFSEQ:NP_080212|VEGA:OTTMUSP00000005592 Tax_Id=10090 Gene_Symbol=Rars Arginyl-tRNA synthetase, cytoplasmic	Q9D0I9	IPI00004860	IPI:IPI00004860.2|SWISS-PROT:P54136-1|TREMBL:Q53GY4|ENSEMBL:ENSP00000231572|REFSEQ:NP_002878|H-INV:HIT000029710|VEGA:OTTHUMP00000160962 Tax_Id=9606 Gene_Symbol=RARS Isoform Complexed of Arginyl-tRNA synthetase, cytoplasmic	P54136		2		1	2
ab16moc_1281	YES	YES	Cycs	MGI:88578	CYCS	HGNC:19986	ENSMUSG00000063694	ENSG00000172115	13063	54205	Cluster 405	Cycs	CYCS	IPI00222419	IPI:IPI00222419.5|SWISS-PROT:P62897|TREMBL:Q56A15|ENSEMBL:ENSMUSP00000072829;ENSMUSP00000076944|REFSEQ:NP_031834;XP_980234;XP_980266;XP_996799 Tax_Id=10090 Gene_Symbol=Cycs;LOC672195 Cytochrome c, somatic	P62897	IPI00465315	IPI:IPI00465315.6|SWISS-PROT:P99999|TREMBL:A4D166;Q6LER6|ENSEMBL:ENSP00000307786|REFSEQ:NP_061820|H-INV:HIT000026606|VEGA:OTTHUMP00000025168;OTTHUMP00000158609 Tax_Id=9606 Gene_Symbol=CYCS Cytochrome c	P99999		2	1		2
ab16moc_1036	YES	YES	Gsn	MGI:95851	GSN	HGNC:4620	ENSMUSG00000026879	ENSG00000148180	227753	2934	Cluster 517	Gsn	GSN	IPI00117167	IPI:IPI00117167.2|SWISS-PROT:P13020-1|TREMBL:A2AL35;Q3TGJ9;Q3U9Q8;Q3UCW8|ENSEMBL:ENSMUSP00000028239|REFSEQ:NP_666232|VEGA:OTTMUSP00000013018 Tax_Id=10090 Gene_Symbol=Gsn Isoform 1 of Gelsolin precursor	P13020	IPI00641047	IPI:IPI00641047.4|TREMBL:Q5T0I0|ENSEMBL:ENSP00000362929|VEGA:OTTHUMP00000022012;OTTHUMP00000022018 Tax_Id=9606 Gene_Symbol=GSN Gelsolin	Q5T0I0		3	2	1	2		YES
ab16moc_243	YES	YES	Gpd2	MGI:99778	GPD2	HGNC:4456	ENSMUSG00000026827	ENSG00000115159	14571	2820	Cluster 495	Gpd2	GPD2	IPI00331182	IPI:IPI00331182.4|SWISS-PROT:Q64521|TREMBL:A2AQR0|ENSEMBL:ENSMUSP00000028167|REFSEQ:NP_034404|VEGA:OTTMUSP00000013434 Tax_Id=10090 Gene_Symbol=Gpd2 Glycerol phosphate dehydrogenase 2, mitochondrial	Q64521	IPI00017895	IPI:IPI00017895.2|SWISS-PROT:P43304-1|TREMBL:Q53RD0;Q53T76;Q8WUQ0|ENSEMBL:ENSP00000308610|REFSEQ:NP_000399;NP_001076581|H-INV:HIT000218082|VEGA:OTTHUMP00000162788 Tax_Id=9606 Gene_Symbol=GPD2 Isoform 1 of Glycerol-3-phosphate dehydrogenase, mitochondrial	P43304		19	18	13	11	YES
ab16moc_788	YES	YES	Ndufs2	MGI:2385112	NDUFS2	HGNC:7708	ENSMUSG00000013593	ENSG00000158864	226646	4720	Cluster 1144	Ndufs2	NDUFS2	IPI00128023	IPI:IPI00128023.3|SWISS-PROT:Q91WD5|ENSEMBL:ENSMUSP00000013737|REFSEQ:NP_694704|VEGA:OTTMUSP00000024040 Tax_Id=10090 Gene_Symbol=Ndufs2 NADH dehydrogenase [ubiquinone] iron-sulfur protein 2, mitochondrial precursor	Q91WD5	IPI00025239	IPI:IPI00025239.2|SWISS-PROT:O75306|TREMBL:Q53HG2;Q5VTW0;Q9HC11;Q9HC12|ENSEMBL:ENSP00000356972|REFSEQ:NP_004541|H-INV:HIT000034035|VEGA:OTTHUMP00000032241;OTTHUMP00000060267 Tax_Id=9606 Gene_Symbol=NDUFS2 NADH dehydrogenase [ubiquinone] iron-sulfur protei	O75306		5	4	4	2	YES	YES
ab16moc_700	YES	YES	Arpc2	MGI:1923959	ARPC2	HGNC:705	ENSMUSG00000006304	ENSG00000163466	76709	10109	Cluster 582	Arpc2	ARPC2	IPI00661414	IPI:IPI00661414.2|SWISS-PROT:Q9CVB6|TREMBL:Q3UA52;Q4FZG5|ENSEMBL:ENSMUSP00000006467|REFSEQ:NP_083987|VEGA:OTTMUSP00000017692;OTTMUSP00000018874 Tax_Id=10090 Gene_Symbol=Arpc2 Actin-related protein 2/3 complex subunit 2	Q9CVB6	IPI00005161	IPI:IPI00005161.3|SWISS-PROT:O15144|TREMBL:Q53R19|ENSEMBL:ENSP00000327137|REFSEQ:NP_005722;NP_690601|H-INV:HIT000029757|VEGA:OTTHUMP00000164144;OTTHUMP00000164986;OTTHUMP00000165866 Tax_Id=9606 Gene_Symbol=ARPC2 Actin-related protein 2/3 complex subunit 2	O15144		6	5	5	6	YES	YES
ab16moc_85	YES	YES	Nckap1	MGI:1355333	NCKAP1	HGNC:7666	ENSMUSG00000027002	ENSG00000061676	50884	10787	Cluster 303	Nckap1	NCKAP1	IPI00755241	IPI:IPI00755241.1|TREMBL:A1L0U6;A2AS98|VEGA:OTTMUSP00000014352 Tax_Id=10090 Gene_Symbol=Nckap1 NCK-associated protein 1	A1L0U6	IPI00409684	IPI:IPI00409684.2|ENSEMBL:ENSP00000354251|REFSEQ:NP_995314|VEGA:OTTHUMP00000163461 Tax_Id=9606 Gene_Symbol=NCKAP1 NCK-associated protein 1 isoform 2	Q9Y2A7		36	26	27	29	YES	YES
ab16moc_476	YES	YES	Exoc5	MGI:2145645	EXOC5	HGNC:10696	ENSMUSG00000061244	ENSG00000070367	105504	10640	Cluster 1001	Exoc5	EXOC5	IPI00749893	IPI:IPI00749893.2|SWISS-PROT:Q3TPX4|TREMBL:Q3U8A5;Q80VK3|ENSEMBL:ENSMUSP00000087302|REFSEQ:NP_997097;XP_998467 Tax_Id=10090 Gene_Symbol=Exoc5 Exocyst complex component 5	Q3TPX4	IPI00829808	IPI:IPI00829808.1|SWISS-PROT:O00471|TREMBL:Q8IW24|REFSEQ:NP_006535|H-INV:HIT000221957|VEGA:OTTHUMP00000028003;OTTHUMP00000082914 Tax_Id=9606 Gene_Symbol=EXOC5 Exocyst complex component 5	O00471		10	8	5	4	YES
ab16moc_1118	YES	YES	Fbxo2	MGI:2446216	FBXO2	HGNC:13581	ENSMUSG00000041556	ENSG00000116661	230904	26232	Cluster 1393	Fbxo2	FBXO2	IPI00153176	IPI:IPI00153176.2|SWISS-PROT:Q80UW2|TREMBL:Q3USR5|ENSEMBL:ENSMUSP00000037377|REFSEQ:NP_789818|VEGA:OTTMUSP00000011756 Tax_Id=10090 Gene_Symbol=Fbxo2 F-box only protein 2	Q80UW2	IPI00007087	IPI:IPI00007087.4|SWISS-PROT:Q9UK22|ENSEMBL:ENSP00000346240|REFSEQ:NP_036300|H-INV:HIT000039851|VEGA:OTTHUMP00000002066;OTTHUMP00000044351 Tax_Id=9606 Gene_Symbol=FBXO2 F-box only protein 2	Q9UK22		3		1	3
ab16moc_684	YES	YES	Cadps	MGI:1350922	CADPS	HGNC:1426	ENSMUSG00000054423	ENSG00000163618	27062	8618	Cluster 1518	Cadps	CADPS	IPI00670114	IPI:IPI00670114.1|SWISS-PROT:Q80TJ1-4 Tax_Id=10090 Gene_Symbol=Cadps Isoform 4 of Calcium-dependent secretion activator 1	Q80TJ1	IPI00478178	IPI:IPI00478178.4|SWISS-PROT:Q9ULU8-4 Tax_Id=9606 Gene_Symbol=CADPS Isoform 4 of Calcium-dependent secretion activator 1	Q9ULU8		6	3	4	2	YES	YES
ab16moc_118	YES	YES	Cyfip1	MGI:1338801	CYFIP1	HGNC:13759	ENSMUSG00000030447	ENSG00000068793	20430	23191	Cluster 417	Cyfip1	CYFIP1	IPI00330476	IPI:IPI00330476.3|SWISS-PROT:Q7TMB8-1|ENSEMBL:ENSMUSP00000032629|REFSEQ:NP_035500 Tax_Id=10090 Gene_Symbol=Cyfip1 Isoform 1 of Cytoplasmic FMR1-interacting protein 1	Q7TMB8	IPI00644231	IPI:IPI00644231.3|SWISS-PROT:Q7L576-1|ENSEMBL:ENSP00000324549|REFSEQ:NP_055423|H-INV:HIT000257648|VEGA:OTTHUMP00000067941;OTTHUMP00000159353;OTTHUMP00000175432 Tax_Id=9606 Gene_Symbol=CYFIP1 Isoform 1 of Cytoplasmic FMR1-interacting protein 1	Q7L576		32	20	21	31	YES	YES
ab16moc_65	YES	YES	Cyfip2	MGI:1924134	CYFIP2	HGNC:13760	ENSMUSG00000020340	ENSG00000055163	76884	26999	Cluster 297	Cyfip2	CYFIP2	IPI00405625	IPI:IPI00405625.9|SWISS-PROT:Q5SQX6|TREMBL:Q6PGK0|ENSEMBL:ENSMUSP00000090854;ENSMUSP00000099852|REFSEQ:NP_598530|VEGA:OTTMUSP00000005638 Tax_Id=10090 Gene_Symbol=Cyfip2 Cytoplasmic FMR1-interacting protein 2	Q5SQX6	IPI00719600	IPI:IPI00719600.4|SWISS-PROT:Q96F07-2|TREMBL:Q9NSN1|ENSEMBL:ENSP00000366799|REFSEQ:NP_001032409;NP_001032410;NP_055191|H-INV:HIT000025145 Tax_Id=9606 Gene_Symbol=CYFIP2 Isoform 2 of Cytoplasmic FMR1-interacting protein 2	Q96F07		42	25	29	39	YES	YES
ab16moc_216	YES	YES	Igsf8	MGI:2154090	IGSF8	HGNC:17813	ENSMUSG00000038034	ENSG00000162729	140559	93185	Cluster 242	Igsf8	IGSF8	IPI00321348	IPI:IPI00321348.3|SWISS-PROT:Q8R366|ENSEMBL:ENSMUSP00000041232|REFSEQ:NP_536344|VEGA:OTTMUSP00000023828;OTTMUSP00000023829 Tax_Id=10090 Gene_Symbol=Igsf8 Immunoglobulin superfamily member 8 precursor	Q8R366	IPI00186736	IPI:IPI00186736.2|SWISS-PROT:Q969P0-3|ENSEMBL:ENSP00000351261|H-INV:HIT000077024|VEGA:OTTHUMP00000025752 Tax_Id=9606 Gene_Symbol=IGSF8 Isoform 3 of Immunoglobulin superfamily member 8 precursor	Q969P0		20	18	19	14	YES	YES
ab16moc_35	YES	YES	Gprin1	MGI:1349455	GPRIN1	HGNC:24835	ENSMUSG00000069227	ENSG00000169258	26913	114787	Cluster 65	Gprin1	GPRIN1	IPI00138232	IPI:IPI00138232.4|SWISS-PROT:Q3UNH4|ENSEMBL:ENSMUSP00000089195;ENSMUSP00000097106|REFSEQ:NP_036144 Tax_Id=10090 Gene_Symbol=Gprin1 G protein-regulated inducer of neurite outgrowth 1	Q3UNH4	IPI00332155	IPI:IPI00332155.1|SWISS-PROT:Q7Z2K8-1|ENSEMBL:ENSP00000305839|REFSEQ:NP_443131|VEGA:OTTHUMP00000161241 Tax_Id=9606 Gene_Symbol=GPRIN1 Isoform 1 of G protein-regulated inducer of neurite outgrowth 1	Q7Z2K8		58	44	39	46	YES	YES
ab16moc_1086	YES	YES	Gipc1	MGI:1926252	GIPC1	HGNC:1226	ENSMUSG00000019433	ENSG00000123159	67903	10755	Cluster 1160	Gipc1	GIPC1	IPI00129107	IPI:IPI00129107.1|SWISS-PROT:Q9Z0G0|ENSEMBL:ENSMUSP00000019577|REFSEQ:NP_061241 Tax_Id=10090 Gene_Symbol=Gipc1 PDZ domain-containing protein GIPC1	Q9Z0G0	IPI00024705	IPI:IPI00024705.1|SWISS-PROT:O14908|ENSEMBL:ENSP00000340698|REFSEQ:NP_005707;NP_974197;NP_974199|H-INV:HIT000029597|VEGA:OTTHUMP00000067437;OTTHUMP00000077972;OTTHUMP00000077973 Tax_Id=9606 Gene_Symbol=GIPC1 PDZ domain-containing protein GIPC1	O14908		3	3	2	3	YES
ab16moc_1255	YES	YES	Sccpdh	MGI:1924486	SCCPDH	HGNC:24275	ENSMUSG00000038936	ENSG00000143653	109232	51097	Cluster 1882	Sccpdh	SCCPDH	IPI00153266	IPI:IPI00153266.1|SWISS-PROT:Q8R127|ENSEMBL:ENSMUSP00000040956|REFSEQ:NP_848768|VEGA:OTTMUSP00000024557 Tax_Id=10090 Gene_Symbol=Sccpdh Probable saccharopine dehydrogenase	Q8R127	IPI00329600	IPI:IPI00329600.3|SWISS-PROT:Q8NBX0|ENSEMBL:ENSP00000355467|REFSEQ:NP_057086|H-INV:HIT000071620|VEGA:OTTHUMP00000038085;OTTHUMP00000044269 Tax_Id=9606 Gene_Symbol=SCCPDH Probable saccharopine dehydrogenase	Q8NBX0		2		1	1		YES
ab16moc_91	YES	YES	Snd1	MGI:1929266	SND1	HGNC:30646	ENSMUSG00000001424	ENSG00000197157	56463	27044	Cluster 273	Snd1	SND1	IPI00123129	IPI:IPI00123129.1|SWISS-PROT:Q78PY7|TREMBL:Q3TJ56;Q3TRW3;Q3TW51;Q3UZI3|ENSEMBL:ENSMUSP00000001460|REFSEQ:NP_062750 Tax_Id=10090 Gene_Symbol=Snd1 Staphylococcal nuclease domain-containing protein 1	Q78PY7	IPI00140420	IPI:IPI00140420.4|SWISS-PROT:Q7KZF4|TREMBL:Q59FF0;Q86UF7|ENSEMBL:ENSP00000346762|REFSEQ:NP_055205|H-INV:HIT000037857|VEGA:OTTHUMP00000024914 Tax_Id=9606 Gene_Symbol=SND1 Staphylococcal nuclease domain-containing protein 1	Q7KZF4		36	29	18	24	YES	YES
ab16moc_710	YES	YES	Arpc3	MGI:1928375	ARPC3	HGNC:706	ENSMUSG00000029465	ENSG00000111229	56378	10094	Cluster 388	Arpc3	ARPC3	IPI00124829	IPI:IPI00124829.5|SWISS-PROT:Q9JM76|ENSEMBL:ENSMUSP00000031421;ENSMUSP00000099584|REFSEQ:NP_062798|VEGA:OTTMUSP00000017455 Tax_Id=10090 Gene_Symbol=Arpc3 Actin-related protein 2/3 complex subunit 3	Q9JM76	IPI00005162	IPI:IPI00005162.3|SWISS-PROT:O15145|TREMBL:Q2LE71|ENSEMBL:ENSP00000228825|REFSEQ:NP_005710|H-INV:HIT000285408|VEGA:OTTHUMP00000070420;OTTHUMP00000166104;OTTHUMP00000166105;OTTHUMP00000169199 Tax_Id=9606 Gene_Symbol=ARPC3 Actin-related protein 2/3 complex	O15145		6	2	4	4	YES	YES
ab16moc_858	YES	YES	Atp5k	MGI:106636	ATP5I	HGNC:846	ENSMUSG00000050856	ENSG00000169020	11958	521	Cluster 168, Cluster 387	Atp5k	ATP5I	IPI00111770	IPI:IPI00111770.7|SWISS-PROT:Q06185|TREMBL:Q5EBI8;Q8BTB6|ENSEMBL:ENSMUSP00000051222|REFSEQ:NP_031533 Tax_Id=10090 Gene_Symbol=Atp5k ATP synthase e chain, mitochondrial	Q06185	IPI00218848	IPI:IPI00218848.5|SWISS-PROT:P56385|ENSEMBL:ENSP00000306003;ENSP00000372487|REFSEQ:NP_009031|H-INV:HIT000101556|VEGA:OTTHUMP00000109533 Tax_Id=9606 Gene_Symbol=ATP5I ATP synthase, H+ transporting, mitochondrial F0 complex, subunit e	P56385		5	5	5	4	YES	YES
ab16moc_1100	YES	YES	Tomm20	MGI:1915202	TOMM20	HGNC:20947	ENSMUSG00000058779	ENSG00000173726	67952	9804	Cluster 562	Tomm20	TOMM20	IPI00120715	IPI:IPI00120715.1|SWISS-PROT:Q9DCC8|TREMBL:Q4KL41|ENSEMBL:ENSMUSP00000077578;ENSMUSP00000077864|REFSEQ:NP_077176 Tax_Id=10090 Gene_Symbol=Tomm20 Mitochondrial import receptor subunit TOM20 homolog	Q9DCC8	IPI00016676	IPI:IPI00016676.1|SWISS-PROT:Q15388|TREMBL:Q6IBT4|ENSEMBL:ENSP00000355566|REFSEQ:NP_055580|H-INV:HIT000042150|VEGA:OTTHUMP00000037593;OTTHUMP00000059215 Tax_Id=9606 Gene_Symbol=TOMM20 Mitochondrial import receptor subunit TOM20 homolog	Q15388		3	3	1	3		YES
ab16moc_229	YES	YES	Efr3b	MGI:2444851	EFR3B	HGNC:29155	ENSMUSG00000020658	ENSG00000084710	668212	22979	Cluster 467	Efr3b	EFR3B	IPI00754572	IPI:IPI00754572.2|TREMBL:Q6ZQ18|ENSEMBL:ENSMUSP00000076399|REFSEQ:NP_001075952 Tax_Id=10090 Gene_Symbol=C030014M07Rik hypothetical protein LOC668212	Q6ZQ18	IPI00032128	IPI:IPI00032128.6|TREMBL:Q9Y2G0|ENSEMBL:ENSP00000334769|REFSEQ:XP_039733;XP_945557|H-INV:HIT000020045 Tax_Id=9606 Gene_Symbol=KIAA0953 similar to Protein KIAA0143	Q9Y2G0		20	12	12	15	YES
ab16moc_650	YES	YES	Efr3a	MGI:1923990	EFR3A	HGNC:28970	ENSMUSG00000015002	ENSG00000132294	76740	23167	Cluster 723	Efr3a	EFR3A	IPI00453863	IPI:IPI00453863.3|SWISS-PROT:Q8BG67-1|ENSEMBL:ENSMUSP00000015146|REFSEQ:NP_598527 Tax_Id=10090 Gene_Symbol=C920006C10Rik Isoform 1 of Protein EFR3-like	Q8BG67	IPI00470468	IPI:IPI00470468.3|SWISS-PROT:Q14156-3|ENSEMBL:ENSP00000367150 Tax_Id=9606 Gene_Symbol=KIAA0143 Isoform 3 of Protein EFR3-like	Q14156		7	3	3	6	YES
ab16moc_1055	YES	YES	Rab3gap2	MGI:1916043	RAB3GAP2	HGNC:17168	ENSMUSG00000039318	ENSG00000118873	98732	25782	Cluster 2784	Rab3gap2	RAB3GAP2	IPI00404477	IPI:IPI00404477.4|SWISS-PROT:Q8BMG7-1|ENSEMBL:ENSMUSP00000066325|REFSEQ:XP_985636 Tax_Id=10090 Gene_Symbol=Rab3gap2 similar to Rab3 GTPase-activating protein non-catalytic subunit (Rab3 GTPase-activating protein 150 kDa subunit) (Rab3-GAP p150) (Rab3-GAP	Q8BMG7	IPI00554590	IPI:IPI00554590.1|SWISS-PROT:Q9H2M9-1|ENSEMBL:ENSP00000351832;ENSP00000373788;ENSP00000373789|REFSEQ:NP_036546|H-INV:HIT000002413|VEGA:OTTHUMP00000035228;OTTHUMP00000061114 Tax_Id=9606 Gene_Symbol=RAB3GAP2 Isoform 1 of Rab3 GTPase-activating protein non-c	Q9H2M9		3	3	1			YES
ab16moc_437	YES	YES	Ndufa7	MGI:1913666	NDUFA7	HGNC:7691	ENSMUSG00000041881	ENSG00000167774	66416	4701	Cluster 39	Ndufa7	NDUFA7	IPI00130322	IPI:IPI00130322.5|SWISS-PROT:Q9Z1P6|ENSEMBL:ENSMUSP00000039692|REFSEQ:NP_075691 Tax_Id=10090 Gene_Symbol=Ndufa7 NADH dehydrogenase [ubiquinone] 1 alpha subcomplex subunit 7	Q9Z1P6	IPI00452731	IPI:IPI00452731.6|SWISS-PROT:O95182|TREMBL:Q32Q14;Q6FG42;Q6IB89|ENSEMBL:ENSP00000301457|REFSEQ:NP_004992|H-INV:HIT000031430|VEGA:OTTHUMP00000066944;OTTHUMP00000077719 Tax_Id=9606 Gene_Symbol=NDUFA7 NADH dehydrogenase [ubiquinone] 1 alpha subcomplex subuni	O95182		11	11	8	8	YES	YES
ab16moc_56	YES	YES	Ckap5	MGI:1923036	CKAP5	HGNC:28959	ENSMUSG00000040549	ENSG00000175216	75786	9793	Cluster 519	Ckap5	CKAP5	IPI00337930	IPI:IPI00337930.4|TREMBL:A2AGT5;Q0VGR0;Q4V782;Q4VAE7;Q6PB55;Q80U79;Q8K250|ENSEMBL:ENSMUSP00000046263|REFSEQ:NP_083713|VEGA:OTTMUSP00000015053 Tax_Id=10090 Gene_Symbol=Ckap5 Ckap5 protein	A2AGT5	IPI00028275	IPI:IPI00028275.1|SWISS-PROT:Q14008|TREMBL:Q0VAX7;Q0VAX8;Q8IYN5|ENSEMBL:ENSP00000346566|REFSEQ:NP_001008938|H-INV:HIT000042253|VEGA:OTTHUMP00000081794 Tax_Id=9606 Gene_Symbol=CKAP5 Cytoskeleton-associated protein 5	Q14008		45	31	30	29	YES	YES
ab16moc_265	YES	YES	Purb	MGI:1338779	PURB	HGNC:9702	ENSMUSG00000049266	ENSG00000146676	19291	5814	Cluster 120	Purb	PURB	IPI00128867	IPI:IPI00128867.3|SWISS-PROT:O35295|TREMBL:Q3UTJ8;Q8BQK8|ENSEMBL:ENSMUSP00000055596|REFSEQ:NP_035351|VEGA:OTTMUSP00000005331 Tax_Id=10090 Gene_Symbol=Purb Transcriptional activator protein Pur-beta	O35295	IPI00045051	IPI:IPI00045051.3|SWISS-PROT:Q96QR8|TREMBL:A4D2L7|ENSEMBL:ENSP00000275523|REFSEQ:NP_150093|H-INV:HIT000083580|VEGA:OTTHUMP00000025196;OTTHUMP00000159538 Tax_Id=9606 Gene_Symbol=PURB Transcriptional activator protein Pur-beta	Q96QR8		18	13	16	11	YES
ab16moc_279	YES	YES	Pura	MGI:103079	PURA	HGNC:9701	ENSMUSG00000043991	ENSG00000185129	19290	5813	Cluster 136	Pura	PURA	IPI00118447	IPI:IPI00118447.1|SWISS-PROT:P42669|TREMBL:Q8C6E9|ENSEMBL:ENSMUSP00000059404|REFSEQ:NP_033015;XP_992814;XP_995650 Tax_Id=10090 Gene_Symbol=Pura Transcriptional activator protein Pur-alpha	P42669	IPI00023591	IPI:IPI00023591.1|SWISS-PROT:Q00577|TREMBL:Q2NLC9;Q2NLD4;Q56A79;Q5U0P9|ENSEMBL:ENSP00000332706|REFSEQ:NP_005850|H-INV:HIT000196930|VEGA:OTTHUMP00000159547 Tax_Id=9606 Gene_Symbol=PURA Transcriptional activator protein Pur-alpha	Q00577		17	12	12	10	YES	YES
ab16moc_957	YES	YES	Rpn2	MGI:98085	RPN2	HGNC:10382	ENSMUSG00000027642	ENSG00000118705	20014	6185	Cluster 1817	Rpn2	RPN2	IPI00475154	IPI:IPI00475154.1|SWISS-PROT:Q9DBG6|TREMBL:A2ACG6;Q3U505;Q61833|ENSEMBL:ENSMUSP00000029171;ENSMUSP00000099417|REFSEQ:NP_062616|VEGA:OTTMUSP00000017300 Tax_Id=10090 Gene_Symbol=Rpn2 Dolichyl-diphosphooligosaccharide--protein glycosyltransferase 63 kDa subu	Q9DBG6	IPI00844076	IPI:IPI00844076.1|SWISS-PROT:P04844|ENSEMBL:ENSP00000237530|REFSEQ:NP_002942|H-INV:HIT000283859|VEGA:OTTHUMP00000030900;OTTHUMP00000030913 Tax_Id=9606 Gene_Symbol=RPN2 Dolichyl-diphosphooligosaccharide--protein glycosyltransferase 63 kDa subunit precursor	P04844		4	3	3	4	YES
ab16moc_622	YES	YES	Dync1li2	MGI:107738	DYNC1LI2	HGNC:2966	ENSMUSG00000035770	ENSG00000135720	234663	1783	Cluster 684	Dync1li2	DYNC1LI2	IPI00420806	IPI:IPI00420806.3|SWISS-PROT:Q6PDL0|TREMBL:Q3UGJ3|ENSEMBL:ENSMUSP00000045480|REFSEQ:NP_001013398 Tax_Id=10090 Gene_Symbol=Dync1li2 Cytoplasmic dynein 1 light intermediate chain 2	Q6PDL0	IPI00011592	IPI:IPI00011592.3|SWISS-PROT:O43237|ENSEMBL:ENSP00000258198|REFSEQ:NP_006132|H-INV:HIT000063309|VEGA:OTTHUMP00000080465;OTTHUMP00000107984;OTTHUMP00000174820 Tax_Id=9606 Gene_Symbol=DYNC1LI2 Cytoplasmic dynein 1 light intermediate chain 2	O43237		7	5	6	6	YES	YES
ab16moc_722	YES	YES	Dync1li1	MGI:2135610	DYNC1LI1	HGNC:18745	ENSMUSG00000032435	ENSG00000144635	235661	51143	Cluster 961	Dync1li1	DYNC1LI1	IPI00153421	IPI:IPI00153421.1|SWISS-PROT:Q8R1Q8|TREMBL:A2VDF8;Q3TVT4;Q3TWG5|ENSEMBL:ENSMUSP00000035366|REFSEQ:NP_666341 Tax_Id=10090 Gene_Symbol=Dync1li1 Cytoplasmic dynein 1 light intermediate chain 1	Q8R1Q8	IPI00007675	IPI:IPI00007675.6|SWISS-PROT:Q9Y6G9|TREMBL:A2RRG7;Q6MZE7|ENSEMBL:ENSP00000273130|REFSEQ:NP_057225|H-INV:HIT000015128|VEGA:OTTHUMP00000161315;OTTHUMP00000170568 Tax_Id=9606 Gene_Symbol=DYNC1LI1 Cytoplasmic dynein 1 light intermediate chain 1	Q9Y6G9		6	3	3	5	YES
ab16moc_763	YES	YES	Cand1	MGI:1261820	CAND1	HGNC:30688	ENSMUSG00000020114	ENSG00000111530	71902	55832	Cluster 927	Cand1	CAND1	IPI00753059	IPI:IPI00753059.1|SWISS-PROT:Q6ZQ38|TREMBL:Q3UMI9|ENSEMBL:ENSMUSP00000020315|REFSEQ:XP_990671 Tax_Id=10090 Gene_Symbol=Cand1 similar to Cullin-associated NEDD8-dissociated protein 1	Q6ZQ38	IPI00100160	IPI:IPI00100160.3|SWISS-PROT:Q86VP6-1|ENSEMBL:ENSP00000299218|REFSEQ:NP_060918|H-INV:HIT000025406|VEGA:OTTHUMP00000168390 Tax_Id=9606 Gene_Symbol=CAND1 Isoform 1 of Cullin-associated NEDD8-dissociated protein 1	Q86VP6		5	2	2	4	YES	YES
ab16moc_716	YES	YES	Atp5h	MGI:1918929	ATP5H	HGNC:845	ENSMUSG00000034566	ENSG00000167863	71679	10476	Cluster 160	Atp5h	ATP5H	IPI00230507	IPI:IPI00230507.5|SWISS-PROT:Q9DCX2|TREMBL:A2A8X4|ENSEMBL:ENSMUSP00000046256|REFSEQ:NP_082138|VEGA:OTTMUSP00000003504;OTTMUSP00000003505;OTTMUSP00000003506 Tax_Id=10090 Gene_Symbol=Atp5h ATP synthase D chain, mitochondrial	Q9DCX2	IPI00220487	IPI:IPI00220487.4|SWISS-PROT:O75947-1|ENSEMBL:ENSP00000301587|REFSEQ:NP_006347|H-INV:HIT000067476|VEGA:OTTHUMP00000182430 Tax_Id=9606 Gene_Symbol=ATP5H Isoform 1 of ATP synthase D chain, mitochondrial	O75947		6	6	5	5	YES
ab16moc_1102	YES	YES	Exoc6	MGI:1351611	EXOC6	HGNC:23196	ENSMUSG00000053799	ENSG00000138190	107371	54536	Cluster 2199	Exoc6	EXOC6	IPI00750941	IPI:IPI00750941.1|TREMBL:Q8C670;Q8R131|REFSEQ:XP_980041 Tax_Id=10090 Gene_Symbol=Exoc6 similar to SEC15 homolog	Q8C670	IPI00163337	IPI:IPI00163337.6|SWISS-PROT:Q8TAG9|TREMBL:Q5VXH8|ENSEMBL:ENSP00000260762|REFSEQ:NP_061926|H-INV:HIT000040552|VEGA:OTTHUMP00000020105;OTTHUMP00000059597 Tax_Id=9606 Gene_Symbol=EXOC6 Exocyst complex component 6	Q8TAG9		3	2	1	3
ab16moc_482	YES	YES	Exoc6b	MGI:1923164	EXOC6B	HGNC:17085	ENSMUSG00000033769	ENSG00000144036	75914	23233	Cluster 1211	Exoc6b	EXOC6B	IPI00755874	IPI:IPI00755874.1|TREMBL:Q5DU10;Q6PCN5|ENSEMBL:ENSMUSP00000037897|REFSEQ:XP_983441;XP_986023 Tax_Id=10090 Gene_Symbol=Exoc6b SEC15-like 2 isoform 9	Q5DU10	IPI00294133	IPI:IPI00294133.5|SWISS-PROT:Q9Y2D4|ENSEMBL:ENSP00000290144|REFSEQ:XP_039570;XP_951009|H-INV:HIT000000636 Tax_Id=9606 Gene_Symbol=EXOC6B similar to Exocyst complex component Sec15B isoform 1	Q9Y2D4		10	6	4	9	YES
ab16moc_644	YES	YES	Atp5f1	MGI:1100495	ATP5F1	HGNC:840	ENSMUSG00000000563	ENSG00000116459	11950	515	Cluster 485	Atp5f1	ATP5F1	IPI00341282	IPI:IPI00341282.2|SWISS-PROT:Q9CQQ7|TREMBL:Q3TJD4;Q3UF04;Q5I0W0;Q64218|ENSEMBL:ENSMUSP00000068013|REFSEQ:NP_033855 Tax_Id=10090 Gene_Symbol=Atp5f1 ATP synthase B chain, mitochondrial precursor	Q9CQQ7	IPI00029133	IPI:IPI00029133.4|SWISS-PROT:P24539|TREMBL:Q08ET0;Q53GB3|ENSEMBL:ENSP00000358737|REFSEQ:NP_001679|H-INV:HIT000293409|VEGA:OTTHUMP00000013469;OTTHUMP00000059088 Tax_Id=9606 Gene_Symbol=ATP5F1 ATP synthase B chain, mitochondrial precursor	P24539		7	5	7	4	YES
ab16moc_653	YES	YES	Plekha6	MGI:2388662	PLEKHA6	HGNC:17053	ENSMUSG00000041757	ENSG00000143850	240753	22874	Cluster 2007	Plekha6	PLEKHA6	IPI00625001	IPI:IPI00625001.3|TREMBL:Q69ZU4|ENSEMBL:ENSMUSP00000083691 Tax_Id=10090 Gene_Symbol=Plekha6 MKIAA0969 protein (Fragment)	Q69ZU4	IPI00007248	IPI:IPI00007248.5|SWISS-PROT:Q9Y2H5|TREMBL:Q5VTI6|ENSEMBL:ENSP00000272203|REFSEQ:NP_055750|H-INV:HIT000000686|VEGA:OTTHUMP00000034310 Tax_Id=9606 Gene_Symbol=PLEKHA6 Pleckstrin homology domain-containing family A member 6	Q9Y2H5		7	5	3	3	YES
ab16moc_163	YES	YES	Plekha5	MGI:1923802	PLEKHA5	HGNC:30036	ENSMUSG00000030231	ENSG00000052126	109135	54477	Cluster 688	Plekha5	PLEKHA5	IPI00229810	IPI:IPI00229810.4|TREMBL:Q6ZPK1|ENSEMBL:ENSMUSP00000084904|REFSEQ:NP_659169 Tax_Id=10090 Gene_Symbol=Plekha5 phosphoinositol 3-phosphate-binding protein-2	Q6ZPK1	IPI00169401	IPI:IPI00169401.2|SWISS-PROT:Q9HAU0-2|ENSEMBL:ENSP00000347560|H-INV:HIT000001402|VEGA:OTTHUMP00000166855 Tax_Id=9606 Gene_Symbol=PLEKHA5 Isoform 2 of Pleckstrin homology domain-containing family A member 5	Q9HAU0		26	20	18	12	YES
ab16moc_811	YES	YES	Ttc35	MGI:1913986	TTC35	HGNC:28963	ENSMUSG00000022337	ENSG00000104412	66736	9694	Cluster 960	Ttc35	TTC35	IPI00133612	IPI:IPI00133612.1|SWISS-PROT:Q9CRD2|TREMBL:Q6A0D1|ENSEMBL:ENSMUSP00000022962|REFSEQ:NP_080012 Tax_Id=10090 Gene_Symbol=Ttc35 Tetratricopeptide repeat protein 35	Q9CRD2	IPI00014149	IPI:IPI00014149.3|SWISS-PROT:Q15006|TREMBL:Q53HG5|ENSEMBL:ENSP00000220853|REFSEQ:NP_055488|H-INV:HIT000039235|VEGA:OTTHUMP00000177971 Tax_Id=9606 Gene_Symbol=TTC35 Tetratricopeptide repeat protein 35	Q15006		5	5	5	3	YES
ab16moc_697	YES	YES	Wasl	MGI:1920428	WASL	HGNC:12735	ENSMUSG00000029684	ENSG00000106299	73178	8976	Cluster 1180	Wasl	WASL	IPI00468996	IPI:IPI00468996.2|SWISS-PROT:Q91YD9|TREMBL:Q05CX6;Q3TXX8;Q3UGK7;Q3UMN0;Q3UQ99;Q3USR1;Q6PDL3;Q7TPN5;Q80VV6|ENSEMBL:ENSMUSP00000031695|REFSEQ:NP_082735 Tax_Id=10090 Gene_Symbol=Wasl Neural Wiskott-Aldrich syndrome protein	Q91YD9	IPI00011676	IPI:IPI00011676.2|SWISS-PROT:O00401|TREMBL:A1JUI9;A4D0Y1;Q68DE4|ENSEMBL:ENSP00000223023|REFSEQ:NP_003932|H-INV:HIT000053836|VEGA:OTTHUMP00000024882 Tax_Id=9606 Gene_Symbol=WASL Neural Wiskott-Aldrich syndrome protein	O00401		6	6	3	4	YES	YES
ab16moc_703	YES	YES	Vps16	MGI:2136772	VPS16	HGNC:14584	ENSMUSG00000027411	ENSG00000215305	80743	64601	Cluster 1443	Vps16	VPS16	IPI00230239	IPI:IPI00230239.2|SWISS-PROT:Q920Q4-2|TREMBL:A2BI91;Q8BWV2;Q8C016|ENSEMBL:ENSMUSP00000028900|REFSEQ:NP_085036|VEGA:OTTMUSP00000016541 Tax_Id=10090 Gene_Symbol=Vps16 vacuolar protein sorting 16	Q920Q4	IPI00305438	IPI:IPI00305438.3|SWISS-PROT:Q9H269-1|ENSEMBL:ENSP00000369825|REFSEQ:NP_072097|VEGA:OTTHUMP00000030047;OTTHUMP00000030052 Tax_Id=9606 Gene_Symbol=VPS16;PTPRA Isoform 1 of Vacuolar protein sorting-associated protein 16 homolog	Q9H269		6	2	2	4	YES
ab16moc_564	YES	YES	Samm50	MGI:1915903	SAMM50	HGNC:24276	ENSMUSG00000022437	ENSG00000100347	68653	25813	Cluster 729	Samm50	SAMM50	IPI00221608	IPI:IPI00221608.3|SWISS-PROT:Q8BGH2|ENSEMBL:ENSMUSP00000023071|REFSEQ:NP_848729 Tax_Id=10090 Gene_Symbol=Samm50 Sorting and assembly machinery component 50 homolog	Q8BGH2	IPI00412713	IPI:IPI00412713.4|SWISS-PROT:Q9Y512|TREMBL:Q53HC4;Q56VW7|ENSEMBL:ENSP00000345445|REFSEQ:NP_056195|H-INV:HIT000035370|VEGA:OTTHUMP00000028894 Tax_Id=9606 Gene_Symbol=SAMM50 Sorting and assembly machinery component 50 homolog	Q9Y512		8	3	6	7	YES	YES
ab16moc_1098	YES	YES	Ndufb8	MGI:1914514	NDUFB8	HGNC:7703	ENSMUSG00000025204	ENSG00000166136	67264	4714	Cluster 780	Ndufb8	NDUFB8	IPI00387430	IPI:IPI00387430.1|SWISS-PROT:Q9D6J5|TREMBL:Q3V406|ENSEMBL:ENSMUSP00000026222|REFSEQ:NP_080337 Tax_Id=10090 Gene_Symbol=Ndufb8 NADH dehydrogenase [ubiquinone] 1 beta subcomplex subunit 8, mitochondrial precursor	Q9D6J5	IPI00028883	IPI:IPI00028883.1|SWISS-PROT:O95169|ENSEMBL:ENSP00000299166|REFSEQ:NP_004995|H-INV:HIT000242705|VEGA:OTTHUMP00000020835;OTTHUMP00000059404 Tax_Id=9606 Gene_Symbol=NDUFB8 NADH dehydrogenase [ubiquinone] 1 beta subcomplex subunit 8, mitochondrial precursor	O95169		3	3	2	3	YES
ab16moc_941	YES	YES	Rps25	MGI:1922867	RPS25	HGNC:10413	ENSMUSG00000009927	ENSG00000185641	75617	6230	Cluster 472	Rps25	RPS25	IPI00115992	IPI:IPI00115992.1|ENSEMBL:ENSMUSP00000072501|REFSEQ:XP_144599;XP_984175 Tax_Id=10090 Gene_Symbol=EG243302 similar to 40S ribosomal protein S25	-	IPI00012750	IPI:IPI00012750.3|SWISS-PROT:P62851|ENSEMBL:ENSP00000236900|REFSEQ:NP_001019|H-INV:HIT000031580 Tax_Id=9606 Gene_Symbol=RPS25 40S ribosomal protein S25	P62851		4	3	3	4	YES	YES
ab16moc_1130	YES	YES	Praf2	MGI:1859607	PRAF2	HGNC:28911	ENSMUSG00000031149	ENSG00000102050	54637	11230	Cluster 908	Praf2	PRAF2	IPI00120546	IPI:IPI00120546.1|SWISS-PROT:Q9JIG8|TREMBL:A2AEV6|ENSEMBL:ENSMUSP00000033489|REFSEQ:NP_613068|VEGA:OTTMUSP00000019397 Tax_Id=10090 Gene_Symbol=Praf2 PRA1 family protein 2	Q9JIG8	IPI00026994	IPI:IPI00026994.3|SWISS-PROT:O60831|ENSEMBL:ENSP00000365570|REFSEQ:NP_009144|H-INV:HIT000244059|VEGA:OTTHUMP00000032407;OTTHUMP00000061816 Tax_Id=9606 Gene_Symbol=PRAF2 PRA1 family protein 2	O60831		3	2	1	2
ab16moc_1324	YES	YES	Faah	MGI:109609	FAAH	HGNC:3553	ENSMUSG00000034171	ENSG00000117480	14073	2166	Cluster 2422	Faah	FAAH	IPI00117176	IPI:IPI00117176.1|SWISS-PROT:O08914|TREMBL:A2A906;Q3UUF0;Q8C541;Q8K4D9;Q8K4H2|ENSEMBL:ENSMUSP00000041543|REFSEQ:NP_034303|VEGA:OTTMUSP00000009093 Tax_Id=10090 Gene_Symbol=Faah Fatty-acid amide hydrolase	O08914	IPI00012107	IPI:IPI00012107.2|SWISS-PROT:O00519|ENSEMBL:ENSP00000243167|REFSEQ:NP_001432|H-INV:HIT000221769|VEGA:OTTHUMP00000009480;OTTHUMP00000046617 Tax_Id=9606 Gene_Symbol=FAAH Fatty-acid amide hydrolase	O00519		2	2	2	2	YES
ab16moc_1133	YES	YES	Ndufb9	MGI:1913468	NDUFB9	HGNC:7704	ENSMUSG00000022354	ENSG00000147684	66218	4715	Cluster 1011	Ndufb9	NDUFB9	IPI00132623	IPI:IPI00132623.3|SWISS-PROT:Q9CQJ8|TREMBL:Q9EPK3|ENSEMBL:ENSMUSP00000022980|REFSEQ:NP_075661 Tax_Id=10090 Gene_Symbol=Ndufb9 NADH dehydrogenase [ubiquinone] 1 beta subcomplex subunit 9	Q9CQJ8	IPI00255052	IPI:IPI00255052.5|SWISS-PROT:Q9Y6M9|TREMBL:Q5JVG7|ENSEMBL:ENSP00000276689|REFSEQ:NP_004996|H-INV:HIT000075295|VEGA:OTTHUMP00000178017 Tax_Id=9606 Gene_Symbol=NDUFB9 NADH dehydrogenase [ubiquinone] 1 beta subcomplex subunit 9	Q9Y6M9		3	2	2	1
ab16moc_717	YES	YES	Ndufa2	MGI:1343103	NDUFA2	HGNC:7685	ENSMUSG00000014294	ENSG00000131495	17991	4695	Cluster 146	Ndufa2	NDUFA2	IPI00315302	IPI:IPI00315302.5|SWISS-PROT:Q9CQ75|ENSEMBL:ENSMUSP00000014438|REFSEQ:NP_035015 Tax_Id=10090 Gene_Symbol=Ndufa2 NADH dehydrogenase [ubiquinone] 1 alpha subcomplex subunit 2	Q9CQ75	IPI00219381	IPI:IPI00219381.5|SWISS-PROT:O43678|ENSEMBL:ENSP00000252102|REFSEQ:NP_002479|H-INV:HIT000001785|VEGA:OTTHUMP00000159890 Tax_Id=9606 Gene_Symbol=NDUFA2 NADH dehydrogenase [ubiquinone] 1 alpha subcomplex subunit 2	O43678		6	4	5	3	YES	YES
ab16moc_1292	YES	YES	Wasf2	MGI:1098641	WASF2	HGNC:12733	ENSMUSG00000028868	ENSG00000158195	242687	10163	Cluster 1891	Wasf2	WASF2	IPI00221723	IPI:IPI00221723.1|SWISS-PROT:Q8BH43|TREMBL:A2AE56;Q3T9Z7;Q3U3E7;Q8BZD7|ENSEMBL:ENSMUSP00000081263|REFSEQ:NP_700472|VEGA:OTTMUSP00000011229;OTTMUSP00000011230 Tax_Id=10090 Gene_Symbol=Wasf2 Wiskott-Aldrich syndrome protein family member 2	Q8BH43	IPI00472164	IPI:IPI00472164.2|SWISS-PROT:Q9Y6W5|TREMBL:Q05BU7;Q8NBU0|ENSEMBL:ENSP00000363131|REFSEQ:NP_008921|H-INV:HIT000052463|VEGA:OTTHUMP00000003471;OTTHUMP00000045044 Tax_Id=9606 Gene_Symbol=WASF2 Wiskott-Aldrich syndrome protein family member 2	Q9Y6W5		2	1	1	2
ab16moc_401	YES	YES	Wasf1	MGI:1890563	WASF1	HGNC:12732	ENSMUSG00000019831	ENSG00000112290	83767	8936	Cluster 545	Wasf1	WASF1	IPI00471372	IPI:IPI00471372.2|SWISS-PROT:Q8R5H6|ENSEMBL:ENSMUSP00000019975|REFSEQ:NP_114083|VEGA:OTTMUSP00000022835;OTTMUSP00000022841 Tax_Id=10090 Gene_Symbol=Wasf1 Wiskott-Aldrich syndrome protein family member 1	Q8R5H6	IPI00022007	IPI:IPI00022007.1|SWISS-PROT:Q92558|TREMBL:Q5SZK7|ENSEMBL:ENSP00000352425|REFSEQ:NP_001020105;NP_001020106;NP_001020107;NP_003922|H-INV:HIT000259093|VEGA:OTTHUMP00000016985;OTTHUMP00000016987;OTTHUMP00000016990;OTTHUMP00000016992 Tax_Id=9606 Gene_Symbol=W	Q92558		12	10	11	11	YES	YES
ab16moc_706	YES	YES	Wasf3	MGI:2658986	WASF3	HGNC:12734	ENSMUSG00000029636	ENSG00000132970	245880	10810	Cluster 947	Wasf3	WASF3	IPI00128341	IPI:IPI00128341.1|SWISS-PROT:Q8VHI6|TREMBL:Q3V386|ENSEMBL:ENSMUSP00000016143|REFSEQ:NP_660137 Tax_Id=10090 Gene_Symbol=Wasf3 Wiskott-Aldrich syndrome protein family member 3	Q8VHI6	IPI00299003	IPI:IPI00299003.2|SWISS-PROT:Q9UPY6|TREMBL:Q5T8P4|ENSEMBL:ENSP00000335055;ENSP00000370877|REFSEQ:NP_006637|H-INV:HIT000000617|VEGA:OTTHUMP00000018160;OTTHUMP00000042321 Tax_Id=9606 Gene_Symbol=WASF3 Wiskott-Aldrich syndrome protein family member 3	Q9UPY6		6	5	4	5	YES	YES
ab16moc_696	YES	YES	Cox6c	MGI:104614	COX6C	HGNC:2285	ENSMUSG00000014313	ENSG00000164919	12864	1345	Cluster 68	Cox6c	COX6C	IPI00131771	IPI:IPI00131771.3|SWISS-PROT:Q9CPQ1|ENSEMBL:ENSMUSP00000014457|REFSEQ:NP_444301 Tax_Id=10090 Gene_Symbol=Cox6c Cytochrome c oxidase polypeptide VIc	Q9CPQ1	IPI00015972	IPI:IPI00015972.1|SWISS-PROT:P09669|ENSEMBL:ENSP00000297564|REFSEQ:NP_004365|H-INV:HIT000321356|VEGA:OTTHUMP00000096511;OTTHUMP00000178133;OTTHUMP00000178134;OTTHUMP00000178135;OTTHUMP00000178136;OTTHUMP00000178137;OTTHUMP00000178138 Tax_Id=9606 Gene_Symb	P09669		6	5	5	5	YES	YES
ab16moc_1072	YES	YES	Ndufa13	MGI:1914434	NDUFA13	HGNC:17194	ENSMUSG00000036199	ENSG00000130288	67184	51079	Cluster 816	Ndufa13	NDUFA13	IPI00230715	IPI:IPI00230715.5|SWISS-PROT:Q9ERS2|ENSEMBL:ENSMUSP00000036453|REFSEQ:NP_075801 Tax_Id=10090 Gene_Symbol=Ndufa13 NADH dehydrogenase [ubiquinone] 1 alpha subcomplex subunit 13	Q9ERS2	IPI00219685	IPI:IPI00219685.5|SWISS-PROT:Q9P0J0|ENSEMBL:ENSP00000252576|REFSEQ:NP_057049|H-INV:HIT000002426|VEGA:OTTHUMP00000067882;OTTHUMP00000076776 Tax_Id=9606 Gene_Symbol=NDUFA13 cell death-regulatory protein GRIM19	Q9P0J0		3	3	2	3	YES	YES
ab16moc_900	YES	YES	Efhd2	MGI:106504	EFHD2	HGNC:28670	ENSMUSG00000040659	ENSG00000142634	27984	79180	Cluster 279	Efhd2	EFHD2	IPI00112223	IPI:IPI00112223.1|SWISS-PROT:Q9D8Y0 Tax_Id=10090 Gene_Symbol=Efhd2 EF-hand domain-containing protein 2	Q9D8Y0	IPI00060181	IPI:IPI00060181.1|SWISS-PROT:Q96C19|TREMBL:Q5JYW9|ENSEMBL:ENSP00000365147|REFSEQ:NP_077305|H-INV:HIT000090812|VEGA:OTTHUMP00000002319;OTTHUMP00000044527 Tax_Id=9606 Gene_Symbol=EFHD2 EF-hand domain-containing protein 2	Q96C19		4	4	2	1		YES
ab16moc_1117	YES	YES	Dctn4	MGI:1914915	DCTN4	HGNC:15518	ENSMUSG00000024603	ENSG00000132912	67665	51164	Cluster 1872	Dctn4	DCTN4	IPI00317289	IPI:IPI00317289.7|SWISS-PROT:Q8CBY8-2|TREMBL:Q3TQY2;Q3TRR2;Q9CRP9|ENSEMBL:ENSMUSP00000025505|REFSEQ:NP_080578 Tax_Id=10090 Gene_Symbol=Dctn4 Isoform 2 of Dynactin subunit 4	Q8CBY8	IPI00550852	IPI:IPI00550852.4|SWISS-PROT:Q9UJW0|TREMBL:Q9NSJ5|ENSEMBL:ENSP00000255263|REFSEQ:NP_057305|H-INV:HIT000040195|VEGA:OTTHUMP00000160558 Tax_Id=9606 Gene_Symbol=DCTN4 Dynactin subunit 4	Q9UJW0		3	1	1	3
ab16moc_515	YES	YES	Exoc2	MGI:1913732	EXOC2	HGNC:24968	ENSMUSG00000021357	ENSG00000112685	66482	55770	Cluster 1315	Exoc2	EXOC2	IPI00655041	IPI:IPI00655041.1|SWISS-PROT:Q9D4H1|TREMBL:Q5SUZ6;Q8C984;Q8K2J3|ENSEMBL:ENSMUSP00000021785;ENSMUSP00000100010|REFSEQ:NP_079864|VEGA:OTTMUSP00000000619 Tax_Id=10090 Gene_Symbol=Exoc2 Exocyst complex component 2	Q9D4H1	IPI00783559	IPI:IPI00783559.1|SWISS-PROT:Q96KP1|ENSEMBL:ENSP00000373417;ENSP00000373418|REFSEQ:NP_060773|H-INV:HIT000265811|VEGA:OTTHUMP00000039160;OTTHUMP00000164193 Tax_Id=9606 Gene_Symbol=EXOC2 Exocyst complex component 2	Q96KP1		9	7	4	6	YES	YES
ab16moc_800	YES	YES	Trappc3	MGI:1351486	TRAPPC3	HGNC:19942	ENSMUSG00000028847	ENSG00000054116	27096	27095	Cluster 380	Trappc3	TRAPPC3	IPI00115056	IPI:IPI00115056.1|SWISS-PROT:O55013|TREMBL:Q3U9K9|ENSEMBL:ENSMUSP00000030660|REFSEQ:NP_038746|VEGA:OTTMUSP00000009752 Tax_Id=10090 Gene_Symbol=Trappc3 Trafficking protein particle complex subunit 3	O55013	IPI00004324	IPI:IPI00004324.1|SWISS-PROT:O43617|ENSEMBL:ENSP00000362261|REFSEQ:NP_055223|H-INV:HIT000033363|VEGA:OTTHUMP00000009025;OTTHUMP00000046189 Tax_Id=9606 Gene_Symbol=TRAPPC3 Trafficking protein particle complex subunit 3	O43617		5	4	4	5	YES	YES
ab16moc_685	YES	YES	Cc2d1a	MGI:2384831	CC2D1A	HGNC:30237	ENSMUSG00000036686	ENSG00000132024	212139	54862	Cluster 1835	Cc2d1a	CC2D1A	IPI00321848	IPI:IPI00321848.6|SWISS-PROT:Q8K1A6|ENSEMBL:ENSMUSP00000046449|REFSEQ:NP_666082 Tax_Id=10090 Gene_Symbol=Cc2d1a Coiled-coil and C2 domain-containing protein 1A	Q8K1A6	IPI00302647	IPI:IPI00302647.4|SWISS-PROT:Q6P1N0-1|TREMBL:Q9H8P7|ENSEMBL:ENSP00000313601|REFSEQ:NP_060191|VEGA:OTTHUMP00000076574 Tax_Id=9606 Gene_Symbol=CC2D1A Isoform 1 of Coiled-coil and C2 domain-containing protein 1A	Q6P1N0		6	3	1	4		YES
ab16moc_1126	YES	YES	Atp5j2	MGI:1927558	ATP5J2	HGNC:848	ENSMUSG00000038690	ENSG00000160916	57423	9551	Cluster 483	Atp5j2	ATP5J2	IPI00271986	IPI:IPI00271986.6|SWISS-PROT:P56135|ENSEMBL:ENSMUSP00000039726|REFSEQ:NP_065607 Tax_Id=10090 Gene_Symbol=Atp5j2 ATP synthase f chain, mitochondrial	P56135	IPI00220300	IPI:IPI00220300.5|SWISS-PROT:P56134-1|TREMBL:Q53FE1;Q6IBB3|ENSEMBL:ENSP00000292475|REFSEQ:NP_004880|VEGA:OTTHUMP00000025269 Tax_Id=9606 Gene_Symbol=ATP5J2 Isoform 1 of ATP synthase f chain, mitochondrial	P56134		3	3	3	2	YES
ab16moc_1269	YES	YES	Ndufb10	MGI:1915592	NDUFB10	HGNC:7696	ENSMUSG00000040048	ENSG00000140990	68342	4716	Cluster 975	Ndufb10	NDUFB10	IPI00121288	IPI:IPI00121288.5|SWISS-PROT:Q9DCS9|ENSEMBL:ENSMUSP00000043543|REFSEQ:NP_080960 Tax_Id=10090 Gene_Symbol=Ndufb10 NADH dehydrogenase [ubiquinone] 1 beta subcomplex subunit 10	Q9DCS9	IPI00479905	IPI:IPI00479905.5|SWISS-PROT:O96000|ENSEMBL:ENSP00000268668|REFSEQ:NP_004539|H-INV:HIT000068144|VEGA:OTTHUMP00000081280;OTTHUMP00000107367;OTTHUMP00000158897 Tax_Id=9606 Gene_Symbol=NDUFB10 NADH dehydrogenase [ubiquinone] 1 beta subcomplex subunit 10	O96000		2	2	2			YES
ab16moc_658	YES	YES	Wfs1	MGI:1328355	WFS1	HGNC:12762	ENSMUSG00000039474	ENSG00000109501	22393	7466	Cluster 1550	Wfs1	WFS1	IPI00114833	IPI:IPI00114833.1|SWISS-PROT:P56695|TREMBL:Q3TDI2;Q3UMA8;Q80UI9|ENSEMBL:ENSMUSP00000048053|REFSEQ:NP_035846 Tax_Id=10090 Gene_Symbol=Wfs1 Wolframin	P56695	IPI00008711	IPI:IPI00008711.3|SWISS-PROT:O76024|ENSEMBL:ENSP00000226760;ENSP00000372060|REFSEQ:NP_005996|H-INV:HIT000326067|VEGA:OTTHUMP00000115499 Tax_Id=9606 Gene_Symbol=WFS1 Wolframin	O76024		7	2		6
ab16moc_1125	YES	YES	Ndufs6	MGI:107932	NDUFS6	HGNC:7713	ENSMUSG00000021606	ENSG00000145494	407785	4726	Cluster 332	Ndufs6	NDUFS6	IPI00128345	IPI:IPI00128345.2|SWISS-PROT:P52503|ENSEMBL:ENSMUSP00000022097|REFSEQ:NP_035018 Tax_Id=10090 Gene_Symbol=Ndufs6 NADH dehydrogenase [ubiquinone] iron-sulfur protein 6, mitochondrial precursor	P52503	IPI00025344	IPI:IPI00025344.1|SWISS-PROT:O75380|TREMBL:Q6IBC4|ENSEMBL:ENSP00000274137;ENSP00000372081|REFSEQ:NP_004544|H-INV:HIT000005777|VEGA:OTTHUMP00000115430 Tax_Id=9606 Gene_Symbol=NDUFS6 NADH dehydrogenase [ubiquinone] iron-sulfur protein 6, mitochondrial precu	O75380		3	2	2	3	YES
ab16moc_516	YES	YES	Pacs1	MGI:1277113	PACS1	HGNC:30032	ENSMUSG00000024855	ENSG00000175115	107975	55690	Cluster 1316	Pacs1	PACS1	IPI00321922	IPI:IPI00321922.2|SWISS-PROT:Q8K212|TREMBL:Q3TAB8;Q3TP27|ENSEMBL:ENSMUSP00000025786|REFSEQ:NP_694769 Tax_Id=10090 Gene_Symbol=Pacs1 Phosphofurin acidic cluster sorting protein 1	Q8K212	IPI00376229	IPI:IPI00376229.1|SWISS-PROT:Q6VY07-1|TREMBL:Q9NTH2|ENSEMBL:ENSP00000316454|REFSEQ:NP_060496|H-INV:HIT000053798 Tax_Id=9606 Gene_Symbol=PACS1 Isoform 1 of Phosphofurin acidic cluster sorting protein 1	Q6VY07		9	6	7	7	YES	YES
ab16moc_686	YES	YES	Nckipsd	MGI:1931834	NCKIPSD	HGNC:15486	ENSMUSG00000032598	ENSG00000213672	80987	51517	Cluster 1380	Nckipsd	NCKIPSD	IPI00467223	IPI:IPI00467223.1|SWISS-PROT:Q9ESJ4|TREMBL:Q3UYF3|ENSEMBL:ENSMUSP00000035218|REFSEQ:NP_109654 Tax_Id=10090 Gene_Symbol=Nckipsd SH3 adapter protein SPIN90	Q9ESJ4	IPI00218563	IPI:IPI00218563.1|SWISS-PROT:Q9NZQ3-2|ENSEMBL:ENSP00000342621|H-INV:HIT000245478|VEGA:OTTHUMP00000171097 Tax_Id=9606 Gene_Symbol=NCKIPSD Isoform 2 of SH3 adapter protein SPIN90	Q9NZQ3		6	6	3	5	YES	YES
ab16moc_588	YES	YES	Rogdi	MGI:1913299	ROGDI	HGNC:29478	ENSMUSG00000022540	ENSG00000067836	66049	79641	Cluster 276	Rogdi	ROGDI	IPI00457757	IPI:IPI00457757.1|TREMBL:Q8BL37|ENSEMBL:ENSMUSP00000087938 Tax_Id=10090 Gene_Symbol=Rogdi Adult male corpora quadrigemina cDNA, RIKEN full-length enriched library, clone:B230397E08 product:similar to LEUCINE-ZIPPER-CONTAINING TRANSCRIPTION FACTOR LZF	Q8BL37	IPI00645577	IPI:IPI00645577.1|TREMBL:Q6IA00;Q9GZN7|ENSEMBL:ENSP00000322832|REFSEQ:NP_078865|H-INV:HIT000282369|VEGA:OTTHUMP00000080587;OTTHUMP00000107854;OTTHUMP00000159854 Tax_Id=9606 Gene_Symbol=ROGDI Protein rogdi homolog	Q6IA00		8	7	4	5	YES
ab16moc_792	YES	YES	Cisd1	MGI:1261855	CISD1	HGNC:30880	ENSMUSG00000037710	ENSG00000122873	52637	55847	Cluster 86	Zcd1	ZCD1	IPI00128346	IPI:IPI00128346.1|SWISS-PROT:Q91WS0|ENSEMBL:ENSMUSP00000043559|REFSEQ:NP_598768 Tax_Id=10090 Gene_Symbol=Zcd1 Zinc finger CDGSH domain-containing protein 1	Q91WS0	IPI00020510	IPI:IPI00020510.1|SWISS-PROT:Q9NZ45|TREMBL:Q1X902|ENSEMBL:ENSP00000363041|REFSEQ:NP_060934|H-INV:HIT000259949|VEGA:OTTHUMP00000019629;OTTHUMP00000062124 Tax_Id=9606 Gene_Symbol=ZCD1 Zinc finger CDGSH domain-containing protein 1	Q9NZ45		5	4	4	5	YES	YES
ab16moc_287	YES	YES	Pfkm	MGI:97548	PFKM	HGNC:8877	ENSMUSG00000033065	ENSG00000152556	18642	5213	Cluster 540	Pfkm	PFKM	IPI00331541	IPI:IPI00331541.5|SWISS-PROT:P47857|TREMBL:O35514;Q1LZL7;Q99K08|ENSEMBL:ENSMUSP00000059801|REFSEQ:NP_067489 Tax_Id=10090 Gene_Symbol=Pfkm 6-phosphofructokinase, muscle type	P47857	IPI00743142	IPI:IPI00743142.2|SWISS-PROT:P08237-1|ENSEMBL:ENSP00000352842|REFSEQ:NP_000280|H-INV:HIT000195032|VEGA:OTTHUMP00000082810;OTTHUMP00000167269;OTTHUMP00000167271 Tax_Id=9606 Gene_Symbol=PFKM Isoform 1 of 6-phosphofructokinase, muscle type	P08237		16	12	15	14	YES	YES
ab16moc_336	YES	YES	Pfkp	MGI:1891833	PFKP	HGNC:8878	ENSMUSG00000021196	ENSG00000067057	56421	5214	Cluster 319	Pfkp	PFKP	IPI00124444	IPI:IPI00124444.1|SWISS-PROT:Q9WUA3-1|TREMBL:Q8C605;Q8C8E8;Q9D255|ENSEMBL:ENSMUSP00000021614|REFSEQ:NP_062677 Tax_Id=10090 Gene_Symbol=Pfkp Isoform 1 of 6-phosphofructokinase type C	Q9WUA3	IPI00009790	IPI:IPI00009790.1|SWISS-PROT:Q01813|TREMBL:Q5VSR8|ENSEMBL:ENSP00000370517|REFSEQ:NP_002618|H-INV:HIT000040690|VEGA:OTTHUMP00000018966;OTTHUMP00000018979 Tax_Id=9606 Gene_Symbol=PFKP 6-phosphofructokinase type C	Q01813		14	12	12	7	YES	YES
ab16moc_389	YES	YES	Pfkl	MGI:97547	PFKL	HGNC:8876	ENSMUSG00000020277	ENSG00000141959	18641	5211	Cluster 786	Pfkl	PFKL	IPI00554862	IPI:IPI00554862.2|SWISS-PROT:P12382 Tax_Id=10090 Gene_Symbol=Pfkl 6-phosphofructokinase, liver type	P12382	IPI00332371	IPI:IPI00332371.9|SWISS-PROT:P17858-1|ENSEMBL:ENSP00000269848|REFSEQ:NP_002617|VEGA:OTTHUMP00000062468;OTTHUMP00000109514 Tax_Id=9606 Gene_Symbol=PFKL Isoform 1 of 6-phosphofructokinase, liver type	P17858		12	6	10	8	YES	YES
ab16moc_803	YES	YES	Twf1	MGI:1100520	TWF1	HGNC:9620	ENSMUSG00000022451	ENSG00000151239	19230	5756	Cluster 919	Twf1	TWF1	IPI00314844	IPI:IPI00314844.2|SWISS-PROT:Q91YR1|ENSEMBL:ENSMUSP00000023087|REFSEQ:NP_032997|VEGA:OTTMUSP00000019148 Tax_Id=10090 Gene_Symbol=Twf1 Twinfilin-1	Q91YR1	IPI00815767	IPI:IPI00815767.1|SWISS-PROT:Q12792-3 Tax_Id=9606 Gene_Symbol=TWF1 Isoform 3 of Twinfilin-1	Q12792		5	5	4	4	YES
ab16moc_1051	YES	YES	Sec24c	MGI:1919746	SEC24C	HGNC:10705	ENSMUSG00000039367	ENSG00000176986	218811	9632	Cluster 1756	Sec24c	SEC24C	IPI00229483	IPI:IPI00229483.3|TREMBL:Q3V222;Q8CGF4|ENSEMBL:ENSMUSP00000045955|REFSEQ:NP_766184 Tax_Id=10090 Gene_Symbol=Sec24c SEC24 related gene family, member C	Q3V222	IPI00024661	IPI:IPI00024661.4|SWISS-PROT:P53992|ENSEMBL:ENSP00000321845;ENSP00000343405|REFSEQ:NP_004913;NP_940999|H-INV:HIT000038477|VEGA:OTTHUMP00000019829;OTTHUMP00000019830;OTTHUMP00000060606 Tax_Id=9606 Gene_Symbol=SEC24C Protein transport protein Sec24C	P53992		3	2	1	2
ab16moc_539	YES	YES	Rpl35	MGI:1913739	RPL35	HGNC:10344	ENSMUSG00000062997	ENSG00000136942	66489	11224	Cluster 83	Rpl35	RPL35	IPI00263879	IPI:IPI00263879.4|TREMBL:Q6ZWV7|ENSEMBL:ENSMUSP00000080402;ENSMUSP00000099843|REFSEQ:NP_079868|VEGA:OTTMUSP00000013245 Tax_Id=10090 Gene_Symbol=Rpl35 11 days embryo whole body cDNA, RIKEN full-length enriched library, clone:2700038I05 product:ribosomal pr	Q6ZWV7	IPI00412607	IPI:IPI00412607.6|SWISS-PROT:P42766|ENSEMBL:ENSP00000259469|REFSEQ:NP_009140|H-INV:HIT000029540|VEGA:OTTHUMP00000022107;OTTHUMP00000064218 Tax_Id=9606 Gene_Symbol=RPL35 60S ribosomal protein L35	P42766		9	9	3	7	YES
ab16moc_1266	YES	YES	Mapk8ip3	MGI:1353598	MAPK8IP3	HGNC:6884	ENSMUSG00000024163	ENSG00000138834	30957	23162	Cluster 2179	Mapk8ip3	MAPK8IP3	IPI00230498	IPI:IPI00230498.1|SWISS-PROT:Q9ESN9-3|TREMBL:Q5D062 Tax_Id=10090 Gene_Symbol=Mapk8ip3 Isoform 1b of C-jun-amino-terminal kinase-interacting protein 3	Q9ESN9	IPI00398504	IPI:IPI00398504.5|SWISS-PROT:Q9UPT6-1|TREMBL:Q68CV8|ENSEMBL:ENSP00000348290|REFSEQ:NP_055948|H-INV:HIT000000783|VEGA:OTTHUMP00000081105;OTTHUMP00000107364;OTTHUMP00000158803 Tax_Id=9606 Gene_Symbol=MAPK8IP3 Isoform 1 of C-jun-amino-terminal kinase-interac	Q9UPT6		2	1		2
ab16moc_311	YES	YES	Exoc4	MGI:1096376	EXOC4	HGNC:30389	ENSMUSG00000029763	ENSG00000131558	20336	60412	Cluster 853	Exoc4	EXOC4	IPI00129959	IPI:IPI00129959.2|SWISS-PROT:O35382|TREMBL:Q69ZD1;Q8CEG7|ENSEMBL:ENSMUSP00000051965|REFSEQ:NP_033174|VEGA:OTTMUSP00000015637 Tax_Id=10090 Gene_Symbol=Exoc4 Exocyst complex component 4	O35382	IPI00059279	IPI:IPI00059279.5|SWISS-PROT:Q96A65|TREMBL:Q541U8;Q6NX51|ENSEMBL:ENSP00000253861|REFSEQ:NP_068579|H-INV:HIT000078647|VEGA:OTTHUMP00000068401 Tax_Id=9606 Gene_Symbol=EXOC4 Exocyst complex component 4	Q96A65		15	10	11	7	YES	YES
ab16moc_58	YES	YES	Baiap2	MGI:2137336	BAIAP2	HGNC:947	ENSMUSG00000025372	ENSG00000175866	108100	10458	Cluster 35	Baiap2	BAIAP2	IPI00124778	IPI:IPI00124778.1|SWISS-PROT:Q8BKX1-2|TREMBL:Q3UKP6|ENSEMBL:ENSMUSP00000074674|REFSEQ:NP_570932|VEGA:OTTMUSP00000004383 Tax_Id=10090 Gene_Symbol=Baiap2 Isoform 2 of Brain-specific angiogenesis inhibitor 1-associated protein 2	Q8BKX1	IPI00124778	IPI:IPI00124778.1|SWISS-PROT:Q8BKX1-2|TREMBL:Q3UKP6|ENSEMBL:ENSMUSP00000074674|REFSEQ:NP_570932|VEGA:OTTMUSP00000004383 Tax_Id=10090 Gene_Symbol=Baiap2 Isoform 2 of Brain-specific angiogenesis inhibitor 1-associated protein 2	Q8BKX1		45	39	40	37	YES	YES
ab16moc_1274	YES	YES	Pnpla6	MGI:1354723	PNPLA6	HGNC:16268	ENSMUSG00000004565	ENSG00000032444	50767	10908	Cluster 2340	Pnpla6	PNPLA6	IPI00128034	IPI:IPI00128034.4|TREMBL:Q7TQD6;Q9R114|ENSEMBL:ENSMUSP00000004681|REFSEQ:NP_056616 Tax_Id=10090 Gene_Symbol=Pnpla6 Neuropathy target esterase homolog	Q7TQD6	IPI00217600	IPI:IPI00217600.6|TREMBL:O60859;Q9UG58|ENSEMBL:ENSP00000373916;ENSP00000373917|REFSEQ:NP_006693|VEGA:OTTHUMP00000066877;OTTHUMP00000077739 Tax_Id=9606 Gene_Symbol=PNPLA6 neuropathy target esterase	O60859		2	2
ab16moc_567	YES	YES	Mosc2	MGI:1914497	MOSC2	HGNC:26064	ENSMUSG00000073481	ENSG00000117791	67247	54996	Cluster 670	Mosc2	MOSC2	IPI00123276	IPI:IPI00123276.1|SWISS-PROT:Q922Q1|ENSEMBL:ENSMUSP00000066715|REFSEQ:NP_598445 Tax_Id=10090 Gene_Symbol=Mosc2 MOSC domain-containing protein 2, mitochondrial precursor	Q922Q1	IPI00329552	IPI:IPI00329552.2|SWISS-PROT:Q969Z3-1|ENSEMBL:ENSP00000355880|REFSEQ:NP_060368|H-INV:HIT000035576|VEGA:OTTHUMP00000035465;OTTHUMP00000061120 Tax_Id=9606 Gene_Symbol=MOSC2 Isoform 1 of MOSC domain-containing protein 2, mitochondrial precursor	Q969Z3		8	5	7	5	YES
ab16moc_525	YES	YES	Ccny	MGI:1915224	CCNY	HGNC:23354	ENSMUSG00000024286	ENSG00000108100	67974	219771	Cluster 524	Ccny	CCNY	IPI00308149	IPI:IPI00308149.1|SWISS-PROT:Q8BGU5-1|ENSEMBL:ENSMUSP00000050001|REFSEQ:NP_080760;XP_980023 Tax_Id=10090 Gene_Symbol=Ccny Isoform 1 of Cyclin fold protein 1	Q8BGU5	IPI00465457	IPI:IPI00465457.4|SWISS-PROT:Q8ND76-1|TREMBL:Q2TU96|ENSEMBL:ENSP00000363836|REFSEQ:NP_659449|H-INV:HIT000243040|VEGA:OTTHUMP00000019453;OTTHUMP00000046336 Tax_Id=9606 Gene_Symbol=CCNY Isoform 1 of Cyclin fold protein 1	Q8ND76		9	8	8	6	YES
ab16moc_960	YES	YES	Ndufa4	MGI:107686	NDUFA4	HGNC:7687	ENSMUSG00000029632	ENSG00000189043	17992	4697	Cluster 287	Ndufa4	NDUFA4	IPI00125929	IPI:IPI00125929.2|SWISS-PROT:Q62425|ENSEMBL:ENSMUSP00000031637|REFSEQ:NP_035016 Tax_Id=10090 Gene_Symbol=Ndufa4 NADH dehydrogenase [ubiquinone] 1 alpha subcomplex subunit 4	Q62425	IPI00011770	IPI:IPI00011770.1|SWISS-PROT:O00483|TREMBL:A4D109|ENSEMBL:ENSP00000339720|REFSEQ:NP_002480|H-INV:HIT000270254|VEGA:OTTHUMP00000025498;OTTHUMP00000115954 Tax_Id=9606 Gene_Symbol=NDUFA4 NADH dehydrogenase [ubiquinone] 1 alpha subcomplex subunit 4	O00483		4	3	3	3	YES	YES
ab16moc_164	YES	YES	Begain	MGI:3044626	BEGAIN	HGNC:24163	ENSMUSG00000040867	ENSG00000183092	380785	57596	Cluster 266	Begain	BEGAIN	IPI00380950	IPI:IPI00380950.6|SWISS-PROT:Q68EF6|ENSEMBL:ENSMUSP00000072899|REFSEQ:XP_354696 Tax_Id=10090 Gene_Symbol=BM948371 similar to Brain-enriched guanylate kinase-associated protein isoform 1	Q68EF6	IPI00010853	IPI:IPI00010853.5|SWISS-PROT:Q9BUH8|ENSEMBL:ENSP00000347301|REFSEQ:NP_065887|H-INV:HIT000031031|VEGA:OTTHUMP00000028089 Tax_Id=9606 Gene_Symbol=KIAA1446 Brain-enriched guanylate kinase-associated protein	Q9BUH8		26	24	16	21	YES
ab16moc_1301	YES	YES	Apool	MGI:1915367	APOOL	HGNC:24009	ENSMUSG00000025525	ENSG00000155008	68117	139322	Cluster 1688	Apool	APOOL	IPI00112493	IPI:IPI00112493.1|SWISS-PROT:Q78IK4|TREMBL:A2AF61;Q9CZB4|ENSEMBL:ENSMUSP00000026599|REFSEQ:NP_080841|VEGA:OTTMUSP00000020016 Tax_Id=10090 Gene_Symbol=Apool 10, 11 days embryo whole body cDNA, RIKEN full-length enriched library, clone:2810024N24 product:hy	Q78IK4	IPI00394809	IPI:IPI00394809.1|SWISS-PROT:Q6UXV4|ENSEMBL:ENSP00000362268|REFSEQ:NP_940852|H-INV:HIT000049777|VEGA:OTTHUMP00000023621 Tax_Id=9606 Gene_Symbol=APOOL Apolipoprotein O-like precursor	Q6UXV4		2	1	1	1
ab16moc_1110	YES	YES	Dctn3	MGI:1859251	DCTN3	HGNC:2713	ENSMUSG00000028447	ENSG00000137100	53598	11258	Cluster 555	Dctn3	DCTN3	IPI00331339	IPI:IPI00331339.3|SWISS-PROT:Q9Z0Y1|TREMBL:A2AMR9|ENSEMBL:ENSMUSP00000030158|REFSEQ:NP_058586|VEGA:OTTMUSP00000007070 Tax_Id=10090 Gene_Symbol=Dctn3 Dynactin subunit 3	Q9Z0Y1	IPI00013654	IPI:IPI00013654.1|SWISS-PROT:O75935-2|ENSEMBL:ENSP00000343986|REFSEQ:NP_077324|VEGA:OTTHUMP00000021293 Tax_Id=9606 Gene_Symbol=DCTN3 Isoform 2 of Dynactin subunit 3	O75935		3	3	2	1
ab16moc_1076	YES	YES	Map6d1	MGI:3607784	MAP6D1	HGNC:25753	ENSMUSG00000041205	ENSG00000180834	208158	79929	Cluster 633	Map6d1	MAP6D1	IPI00816921	IPI:IPI00816921.1|SWISS-PROT:Q14BB9|ENSEMBL:ENSMUSP00000097658|REFSEQ:NP_941001 Tax_Id=10090 Gene_Symbol=Map6d1 MAP6 domain-containing protein 1	Q14BB9	IPI00016385	IPI:IPI00016385.4|SWISS-PROT:Q9H9H5|ENSEMBL:ENSP00000314560|REFSEQ:NP_079147|H-INV:HIT000006084|VEGA:OTTHUMP00000173742 Tax_Id=9606 Gene_Symbol=MAP6D1 MAP6 domain-containing protein 1	Q9H9H5		3	3	2	2	YES	YES
ab16moc_37	YES	YES	Mtap6	MGI:1201690	MAP6	HGNC:6868	ENSMUSG00000055407	ENSG00000171533	17760	4135	Cluster 104	Mtap6	MAP6	IPI00115833	IPI:IPI00115833.2|TREMBL:O55129;Q78DV5|ENSEMBL:ENSMUSP00000064787|REFSEQ:NP_034967 Tax_Id=10090 Gene_Symbol=Mtap6 microtubule-associated protein 6 isoform 1	O55129	IPI00420071	IPI:IPI00420071.1|TREMBL:Q6P3T0;Q6ZWB8|ENSEMBL:ENSP00000307093|REFSEQ:NP_149052|H-INV:HIT000043213 Tax_Id=9606 Gene_Symbol=MAP6 microtubule-associated protein 6 isoform 1	Q6P3T0		56	43	33	49	YES	YES
ab16moc_442	YES	YES	Bcas1	MGI:1924210	BCAS1	HGNC:974	ENSMUSG00000013523	ENSG00000064787	76960	8537	Cluster 664	Bcas1	BCAS1	IPI00756676	IPI:IPI00756676.2|TREMBL:A2ATB6;Q14CE2;Q14DK3|VEGA:OTTMUSP00000017230 Tax_Id=10090 Gene_Symbol=Bcas1 Bcas1 protein	A2ATB6	IPI00025311	IPI:IPI00025311.2|SWISS-PROT:O75363-1|TREMBL:A0AVG7|ENSEMBL:ENSP00000360490|REFSEQ:NP_003648|H-INV:HIT000063652|VEGA:OTTHUMP00000031312;OTTHUMP00000031313 Tax_Id=9606 Gene_Symbol=BCAS1 Isoform 1 of Breast carcinoma amplified sequence 1	O75363		11	11	6	8	YES	YES
ab16moc_462	YES	YES	Mtap7d1	MGI:2384297	MAP7D1	HGNC:25514	ENSMUSG00000028849	ENSG00000116871	245877	55700	Cluster 968, Cluster 2121	Mtap7d1	MAP7D1	IPI00649400	IPI:IPI00649400.1|TREMBL:A2AJI1|VEGA:OTTMUSP00000009746 Tax_Id=10090 Gene_Symbol=Mtap7d1 Novel protein containing an E-MAP-115 domain	A2AJI1	IPI00654605	IPI:IPI00654605.1|TREMBL:Q3KQU3;Q6NX58|ENSEMBL:ENSP00000362243;ENSP00000362244|REFSEQ:NP_060537|VEGA:OTTHUMP00000009183 Tax_Id=9606 Gene_Symbol=MAP7D1 Arginine/proline-rich coiled-coil protein 1	Q3KQU3		11	8	4	6	YES	YES
ab16moc_1106	YES	YES	Ndufb6	MGI:2684983	NDUFB6	HGNC:7701	ENSMUSG00000071014	ENSG00000165264	230075	4712	Cluster 551	Ndufb6	NDUFB6	IPI00648743	IPI:IPI00648743.1|TREMBL:A2AP32|VEGA:OTTMUSP00000006940 Tax_Id=10090 Gene_Symbol=Ndufb6 Novel protein	A2AP32	IPI00375914	IPI:IPI00375914.1|TREMBL:Q5VYT2|ENSEMBL:ENSP00000297983|REFSEQ:NP_877416|VEGA:OTTHUMP00000021180 Tax_Id=9606 Gene_Symbol=NDUFB6 NADH dehydrogenase (ubiquinone) 1 beta subcomplex, 6, 17kDa isoform 2	Q5VYT2		3	2	2	2	YES	YES
ab16moc_72	YES	YES	Atp5a1	MGI:88115	ATP5A1	HGNC:823	ENSMUSG00000025428	ENSG00000152234	11946	498	Cluster 58	Atp5a1	ATP5A1	IPI00130280	IPI:IPI00130280.1|SWISS-PROT:Q03265|ENSEMBL:ENSMUSP00000026495|REFSEQ:NP_031531|VEGA:OTTMUSP00000019113 Tax_Id=10090 Gene_Symbol=Atp5a1 ATP synthase subunit alpha, mitochondrial precursor	Q03265	IPI00440493	IPI:IPI00440493.2|SWISS-PROT:P25705|TREMBL:Q53XX6|ENSEMBL:ENSP00000282050|REFSEQ:NP_001001937;NP_004037|H-INV:HIT000049010|VEGA:OTTHUMP00000041988;OTTHUMP00000072923;OTTHUMP00000163475 Tax_Id=9606 Gene_Symbol=ATP5A1 ATP synthase subunit alpha, mitochondri	P25705		41	38	31	25	YES	YES
ab16moc_385	YES	YES	Dctn2	MGI:107733	DCTN2	HGNC:2712	ENSMUSG00000025410	ENSG00000175203	69654	10540	Cluster 343	Dctn2	DCTN2	IPI00116112	IPI:IPI00116112.3|SWISS-PROT:Q99KJ8|TREMBL:Q3TPZ5|ENSEMBL:ENSMUSP00000026479|REFSEQ:NP_081427 Tax_Id=10090 Gene_Symbol=Dctn2 Dynactin subunit 2	Q99KJ8	IPI00220503	IPI:IPI00220503.9|SWISS-PROT:Q13561|TREMBL:Q53H88|ENSEMBL:ENSP00000346785|REFSEQ:NP_006391|H-INV:HIT000220182|VEGA:OTTHUMP00000082840;OTTHUMP00000168260 Tax_Id=9606 Gene_Symbol=DCTN2 dynactin 2	Q13561		12	12	6	7	YES	YES
ab16moc_1137	YES	YES	Erlin1	MGI:2387613	ERLIN1	HGNC:16947	ENSMUSG00000025198	ENSG00000107566	226144	10613	Cluster 1553	Erlin1	ERLIN1	IPI00762654	IPI:IPI00762654.1|SWISS-PROT:Q91X78|ENSEMBL:ENSMUSP00000097007|REFSEQ:NP_663477 Tax_Id=10090 Gene_Symbol=Erlin1 SPFH domain-containing protein 1 precursor	Q91X78	IPI00007940	IPI:IPI00007940.5|SWISS-PROT:O75477|ENSEMBL:ENSP00000359436;ENSP00000359438|REFSEQ:NP_006450|VEGA:OTTHUMP00000020274;OTTHUMP00000020275 Tax_Id=9606 Gene_Symbol=ERLIN1 SPFH domain-containing protein 1 precursor	O75477		3	3	3
ab16moc_733	YES	YES	Erlin2	MGI:2387215	ERLIN2	HGNC:1356	ENSMUSG00000031483	ENSG00000147475	244373	11160	Cluster 762	Erlin2	ERLIN2	IPI00221540	IPI:IPI00221540.1|SWISS-PROT:Q8BFZ9|ENSEMBL:ENSMUSP00000033873|REFSEQ:NP_705820 Tax_Id=10090 Gene_Symbol=Erlin2 SPFH domain-containing protein 2 precursor	Q8BFZ9	IPI00026942	IPI:IPI00026942.4|SWISS-PROT:O94905-1|TREMBL:A0JLQ1|ENSEMBL:ENSP00000276461|REFSEQ:NP_009106|H-INV:HIT000252153|VEGA:OTTHUMP00000177349 Tax_Id=9606 Gene_Symbol=ERLIN2 ERLIN2 protein (Fragment)	O94905		6	4		3
ab16moc_47	YES	YES	Immt	MGI:1923864	IMMT	HGNC:6047	ENSMUSG00000052337	ENSG00000132305	76614	10989	Cluster 92	Immt	IMMT	IPI00381412	IPI:IPI00381412.1|SWISS-PROT:Q8CAQ8-2 Tax_Id=10090 Gene_Symbol=Immt Isoform 2 of Mitochondrial inner membrane protein	Q8CAQ8	IPI00009960	IPI:IPI00009960.6|SWISS-PROT:Q16891-1|TREMBL:Q05DN3|ENSEMBL:ENSP00000254636|REFSEQ:NP_006830|H-INV:HIT000101087 Tax_Id=9606 Gene_Symbol=IMMT Isoform 1 of Mitochondrial inner membrane protein	Q16891		49	41	26	31	YES	YES
ab16moc_828	YES	YES	Ndufb4	MGI:1915444	NDUFB4	HGNC:7699	ENSMUSG00000022820	ENSG00000124399	68194	4710	Cluster 410	Ndufb4	NDUFB4	IPI00132390	IPI:IPI00132390.5|SWISS-PROT:Q9CQC7|TREMBL:Q4VAE8|ENSEMBL:ENSMUSP00000023514|REFSEQ:NP_080886 Tax_Id=10090 Gene_Symbol=Ndufb4 NADH dehydrogenase [ubiquinone] 1 beta subcomplex subunit 4	Q9CQC7	IPI00220059	IPI:IPI00220059.5|SWISS-PROT:O95168|ENSEMBL:ENSP00000184266|REFSEQ:NP_004538;XP_001125915|H-INV:HIT000029958|VEGA:OTTHUMP00000172392 Tax_Id=9606 Gene_Symbol=LOC727762;NDUFB4 NADH dehydrogenase [ubiquinone] 1 beta subcomplex subunit 4	O95168		5	4	2	5	YES
ab16moc_148	YES	YES	Lmo7	MGI:1353586	LMO7	HGNC:6646	ENSMUSG00000033060	ENSG00000136153	380928	4008	Cluster 674	Lmo7	LMO7	IPI00659447	IPI:IPI00659447.2|TREMBL:A0T1J8|REFSEQ:NP_963287 Tax_Id=10090 Gene_Symbol=Lmo7 LIM domain only 7	A0T1J8	IPI00409591	IPI:IPI00409591.1|SWISS-PROT:Q8WWI1-2|ENSEMBL:ENSP00000351728 Tax_Id=9606 Gene_Symbol=LMO7 Isoform 2 of LIM domain only protein 7	Q8WWI1		28	19	12	20	YES	YES
ab16moc_594	YES	YES	Strn4	MGI:2142346	STRN4	HGNC:15721	ENSMUSG00000030374	ENSG00000090372	97387	29888	Cluster 1168	Strn4	STRN4	IPI00607010	IPI:IPI00607010.1|SWISS-PROT:P58404-2|REFSEQ:NP_001034967 Tax_Id=10090 Gene_Symbol=Strn4 Isoform 2 of Striatin-4	P58404	IPI00003016	IPI:IPI00003016.3|SWISS-PROT:Q9NRL3|TREMBL:Q8NE53|ENSEMBL:ENSP00000263280|REFSEQ:NP_037535|H-INV:HIT000074068|VEGA:OTTHUMP00000069148;OTTHUMP00000078118 Tax_Id=9606 Gene_Symbol=STRN4 Striatin-4	Q9NRL3		8	5	4	7	YES
ab16moc_410	YES	YES	6330407J23Rik	MGI:1914662	KIAA0408	HGNC:21636	ENSMUSG00000038916	ENSG00000214338	67412	9729	Cluster 850	6330407J23Rik	C6ORF174	IPI00403618	IPI:IPI00403618.4|SWISS-PROT:Q6NZL0|ENSEMBL:ENSMUSP00000035520|REFSEQ:NP_080414 Tax_Id=10090 Gene_Symbol=6330407J23Rik Uncharacterized protein C6orf174 homolog precursor	Q6NZL0	IPI00647205	IPI:IPI00647205.1|SWISS-PROT:Q5TF21|TREMBL:A1L177|ENSEMBL:ENSP00000237296;ENSP00000357251|REFSEQ:NP_001012279|H-INV:HIT000021345|VEGA:OTTHUMP00000017175;OTTHUMP00000040315 Tax_Id=9606 Gene_Symbol=C6orf174 Uncharacterized protein C6orf174 precursor	Q5TF21		12	10	6	6	YES	YES
ab16moc_59	YES	YES	Sipa1l1	MGI:2443679	SIPA1L1	HGNC:20284	ENSMUSG00000042700	ENSG00000197555	217692	26037	Cluster 480	Sipa1l1	SIPA1L1	IPI00453688	IPI:IPI00453688.1|SWISS-PROT:Q8C0T5-1|TREMBL:Q3TAF4;Q4VBF8|ENSEMBL:ENSMUSP00000037886;ENSMUSP00000061014|REFSEQ:NP_766167 Tax_Id=10090 Gene_Symbol=Sipa1l1 Isoform 1 of Signal-induced proliferation-associated 1-like protein 1	Q8C0T5	IPI00435422	IPI:IPI00435422.2|SWISS-PROT:O43166-2|ENSEMBL:ENSP00000370630 Tax_Id=9606 Gene_Symbol=SIPA1L1 Isoform 2 of Signal-induced proliferation-associated 1-like protein 1	O43166		45	31	25	31	YES
ab16moc_332	YES	YES	AW555464	MGI:2145043	KIAA0284	HGNC:20362	ENSMUSG00000072825	ENSG00000099814	217882	283638	Cluster 1341, Cluster 2639	AW555464	KIAA0284	IPI00380953	IPI:IPI00380953.5|SWISS-PROT:Q80U49-1|ENSEMBL:ENSMUSP00000098580|REFSEQ:NP_001019773 Tax_Id=10090 Gene_Symbol=AW555464 Isoform 1 of Protein KIAA0284	Q80U49	IPI00843802	IPI:IPI00843802.1|SWISS-PROT:Q9Y4F5-1 Tax_Id=9606 Gene_Symbol=KIAA0284 Isoform 1 of Protein KIAA0284	Q9Y4F5		15	8	4	9	YES	YES
ab16moc_1306	YES	YES	Nrn1	MGI:1915654	NRN1	HGNC:17972	ENSMUSG00000039114	ENSG00000124785	68404	51299	Cluster 750	Nrn1	NRN1	IPI00229407	IPI:IPI00229407.1|SWISS-PROT:Q8CFV4|ENSEMBL:ENSMUSP00000040900|REFSEQ:NP_705757 Tax_Id=10090 Gene_Symbol=Nrn1 Neuritin precursor	Q8CFV4	IPI00470625	IPI:IPI00470625.2|SWISS-PROT:Q9NPD7|ENSEMBL:ENSP00000244766|REFSEQ:NP_057672|H-INV:HIT000299506|VEGA:OTTHUMP00000015989;OTTHUMP00000039216 Tax_Id=9606 Gene_Symbol=NRN1 Neuritin precursor	Q9NPD7		2	2	1	1
ab16moc_435	YES	YES	Crtac1	MGI:1920082	CRTAC1	HGNC:14882	ENSMUSG00000042401	ENSG00000095713	72832	55118	Cluster 819	Crtac1	CRTAC1	IPI00330653	IPI:IPI00330653.2|SWISS-PROT:Q8R555|TREMBL:Q3UF40|ENSEMBL:ENSMUSP00000044858|REFSEQ:NP_660105 Tax_Id=10090 Gene_Symbol=Crtac1 Cartilage acidic protein 1 precursor	Q8R555	IPI00451625	IPI:IPI00451625.1|SWISS-PROT:Q9NQ79-2|TREMBL:Q5TAB2|ENSEMBL:ENSP00000310810;ENSP00000359623|VEGA:OTTHUMP00000020235;OTTHUMP00000020239 Tax_Id=9606 Gene_Symbol=CRTAC1 Isoform 2 of Cartilage acidic protein 1 precursor	Q9NQ79		11	10	7	7	YES	YES
ab16moc_705	YES	YES	Fam82a2	MGI:1915059	FAM82A2	HGNC:25550	ENSMUSG00000070730	ENSG00000137824	67809	55177	Cluster 1137	Fam82c	FAM82C	IPI00678532	IPI:IPI00678532.3|SWISS-PROT:Q3UJU9|ENSEMBL:ENSMUSP00000092283|REFSEQ:NP_001028308|VEGA:OTTMUSP00000016776 Tax_Id=10090 Gene_Symbol=1200015F23Rik Protein FAM82C	Q3UJU9	IPI00410079	IPI:IPI00410079.3|SWISS-PROT:Q96TC7-1|ENSEMBL:ENSP00000342493|REFSEQ:NP_060615|H-INV:HIT000043065|VEGA:OTTHUMP00000160543;OTTHUMP00000176196 Tax_Id=9606 Gene_Symbol=FAM82C Isoform 1 of Protein FAM82C	Q96TC7		6	5	2	2	YES	YES
ab16moc_149	YES	YES	Ppp1r9b	MGI:2387581	PPP1R9B	HGNC:9298	ENSMUSG00000038976	ENSG00000108819	217124	84687	Cluster 337	Ppp1r9b	PPP1R9B	IPI00420651	IPI:IPI00420651.3|SWISS-PROT:Q6R891-1|ENSEMBL:ENSMUSP00000041732|REFSEQ:NP_758465|VEGA:OTTMUSP00000001457 Tax_Id=10090 Gene_Symbol=Ppp1r9b Isoform 1 of Neurabin-2	Q6R891	IPI00045550	IPI:IPI00045550.4|SWISS-PROT:Q96SB3|TREMBL:Q96B17|ENSEMBL:ENSP00000320510|REFSEQ:NP_115984|H-INV:HIT000026567|VEGA:OTTHUMP00000182014 Tax_Id=9606 Gene_Symbol=PPP1R9B protein phosphatase 1, regulatory subunit 9B	Q96SB3		28	25	15	18	YES	YES
ab16moc_123	YES	YES	Ppp1r9a	MGI:2442401	PPP1R9A	HGNC:14946	ENSMUSG00000032827	ENSG00000158528	243725	55607	Cluster 431	Ppp1r9a	PPP1R9A	IPI00336313	IPI:IPI00336313.2|TREMBL:Q3UUK5;Q3UXW4;Q7TN74;Q7TSA7;Q80TH3|ENSEMBL:ENSMUSP00000046906|REFSEQ:NP_853626 Tax_Id=10090 Gene_Symbol=Ppp1r9a Neural tissue-specific F-actin binding protein	Q3UUK5	IPI00008144	IPI:IPI00008144.2|SWISS-PROT:Q9ULJ8-1|ENSEMBL:ENSP00000344524|REFSEQ:NP_060120|H-INV:HIT000000938|VEGA:OTTHUMP00000025095 Tax_Id=9606 Gene_Symbol=PPP1R9A Isoform 1 of Neurabin-1	Q9ULJ8		32	29	17	17	YES
ab16moc_1079	YES	YES	Tollip	MGI:1891808	TOLLIP	HGNC:16476	ENSMUSG00000025139	ENSG00000078902	54473	54472	Cluster 1033	Tollip	TOLLIP	IPI00136618	IPI:IPI00136618.1|SWISS-PROT:Q9QZ06|TREMBL:Q8BQL7|ENSEMBL:ENSMUSP00000001950|REFSEQ:NP_076253 Tax_Id=10090 Gene_Symbol=Tollip Toll-interacting protein	Q9QZ06	IPI00100154	IPI:IPI00100154.1|SWISS-PROT:Q9H0E2|TREMBL:Q6FIE9|ENSEMBL:ENSP00000314733|REFSEQ:NP_061882|H-INV:HIT000025431|VEGA:OTTHUMP00000115912;OTTHUMP00000164471 Tax_Id=9606 Gene_Symbol=TOLLIP Toll-interacting protein	Q9H0E2		3	3	2	1		YES
ab16moc_727	YES	YES	Mff	MGI:1922984	MFF	HGNC:24858	ENSMUSG00000026150	ENSG00000168958	75734	56947	Cluster 653	5230400G24Rik	5230400G24RIK	IPI00420734	IPI:IPI00420734.1|TREMBL:Q6PCP5|ENSEMBL:ENSMUSP00000077446|REFSEQ:NP_083685 Tax_Id=10090 Gene_Symbol=5230400G24Rik RIKEN cDNA 5230400G24 gene	Q6PCP5	IPI00024816	IPI:IPI00024816.3|TREMBL:Q658R6;Q9H690|ENSEMBL:ENSP00000304898 Tax_Id=9606 Gene_Symbol=C2orf33 CDNA: FLJ22484 fis, clone HRC10868	Q658R6		6	6	4	2	YES
ab16moc_973	YES	YES	Fam107a	MGI:3041256	FAM107A	HGNC:30827	ENSMUSG00000021750	ENSG00000168309	268709	11170	Cluster 614	BC055107	BC055107	IPI00221492	IPI:IPI00221492.1|TREMBL:Q78TU8|ENSEMBL:ENSMUSP00000022270;ENSMUSP00000045513|REFSEQ:NP_899010 Tax_Id=10090 Gene_Symbol=BC055107 Adult retina cDNA, RIKEN full-length enriched library, clone:A930001P21 product:DRR1 PROTEIN (TU3A PROTEIN) homolog	Q78TU8	IPI00001527	IPI:IPI00001527.5|SWISS-PROT:O95990-1|TREMBL:Q6IAM1|ENSEMBL:ENSP00000354270|REFSEQ:NP_001070246;NP_009108|VEGA:OTTHUMP00000171690;OTTHUMP00000171693 Tax_Id=9606 Gene_Symbol=FAM107A Isoform 1 of Protein FAM107A	O95990		4	4		2
ab16moc_244	YES	YES	Mprip	MGI:1349438	MPRIP	HGNC:30321	ENSMUSG00000005417	ENSG00000133030	26936	23164	Cluster 1576	M-rip	AA536749	IPI00406030	IPI:IPI00406030.2|TREMBL:Q5SWZ5;Q8C8T6;Q8CHC7|ENSEMBL:ENSMUSP00000071081|VEGA:OTTMUSP00000005973 Tax_Id=10090 Gene_Symbol=AA536749 Rho interacting protein 3	Q5SWZ5	IPI00797766	IPI:IPI00797766.1|TREMBL:Q9Y6X7|ENSEMBL:ENSP00000317786|VEGA:OTTHUMP00000065510 Tax_Id=9606 Gene_Symbol=M-RIP KIAA0864 protein	Q9Y6X7		19	14	6	10	YES
ab16moc_832	YES	YES	Rftn1	MGI:1923688	RFTN1	HGNC:30278	ENSMUSG00000039316	ENSG00000131378	76438	23180	Cluster 1485	Rftn1	RFTN1	IPI00469253	IPI:IPI00469253.6|SWISS-PROT:Q6A0D4|TREMBL:Q80VF9;Q8C4D5|ENSEMBL:ENSMUSP00000046524|REFSEQ:NP_852062 Tax_Id=10090 Gene_Symbol=Rftn1 Raftlin	Q6A0D4	IPI00749454	IPI:IPI00749454.4|SWISS-PROT:Q14699|ENSEMBL:ENSP00000334153|REFSEQ:NP_055965|H-INV:HIT000251153|VEGA:OTTHUMP00000170415 Tax_Id=9606 Gene_Symbol=RFTN1 Raftlin	Q14699		5	3		2
ab16moc_209	YES	YES	Ywhaz	MGI:109484	YWHAZ	HGNC:12855	ENSMUSG00000022285	ENSG00000164924	22631	7534	Cluster 20	Ywhaz	YWHAZ	IPI00116498	IPI:IPI00116498.1|SWISS-PROT:P63101|TREMBL:Q3UA58|ENSEMBL:ENSMUSP00000022894|REFSEQ:NP_035870|VEGA:OTTMUSP00000018478;OTTMUSP00000018479;OTTMUSP00000018480 Tax_Id=10090 Gene_Symbol=Ywhaz 14-3-3 protein zeta/delta	P63101	IPI00021263	IPI:IPI00021263.3|SWISS-PROT:P63104|ENSEMBL:ENSP00000309503|REFSEQ:NP_003397;NP_663723|H-INV:HIT000196622|VEGA:OTTHUMP00000069524;OTTHUMP00000069525;OTTHUMP00000069527;OTTHUMP00000165851;OTTHUMP00000165852;OTTHUMP00000165854;OTTHUMP00000165858;OTTHUMP0000	P63104		21	16	16	15	YES	YES
ab16moc_255	YES	YES	Ywhab	MGI:1891917	YWHAB	HGNC:12849	ENSMUSG00000018326	ENSG00000166913	54401	7529	Cluster 43	Ywhab	YWHAB	IPI00230682	IPI:IPI00230682.6|SWISS-PROT:Q9CQV8-1|TREMBL:A2A5N2|ENSEMBL:ENSMUSP00000018470|REFSEQ:NP_061223|VEGA:OTTMUSP00000017275 Tax_Id=10090 Gene_Symbol=Ywhab Isoform Long of 14-3-3 protein beta/alpha	Q9CQV8	IPI00216318	IPI:IPI00216318.5|SWISS-PROT:P31946-1|ENSEMBL:ENSP00000300161;ENSP00000361930|REFSEQ:NP_003395;NP_647539|H-INV:HIT000322080|VEGA:OTTHUMP00000031075;OTTHUMP00000031076;OTTHUMP00000042851;OTTHUMP00000042852;OTTHUMP00000064303;OTTHUMP00000064304 Tax_Id=9606	P31946		18	18	11	9	YES	YES
ab16moc_270	YES	YES	Ywhae	MGI:894689	YWHAE	HGNC:12851	ENSMUSG00000020849	ENSG00000108953	22627	7531	Cluster 67	Ywhae	YWHAE	IPI00118384	IPI:IPI00118384.1|SWISS-PROT:P62259|TREMBL:Q3V453;Q5SS40;Q8BPH1|ENSEMBL:ENSMUSP00000070993|REFSEQ:NP_033562|VEGA:OTTMUSP00000006521 Tax_Id=10090 Gene_Symbol=Ywhae 14-3-3 protein epsilon	P62259	IPI00000816	IPI:IPI00000816.1|SWISS-PROT:P62258|TREMBL:Q4VJB6;Q53XZ5|ENSEMBL:ENSP00000264335|REFSEQ:NP_006752|H-INV:HIT000219855|VEGA:OTTHUMP00000041831;OTTHUMP00000166035;OTTHUMP00000182972 Tax_Id=9606 Gene_Symbol=YWHAE 14-3-3 protein epsilon	P62258		17	13	14	11	YES	YES
ab16moc_271	YES	YES	Ywhag	MGI:108109	YWHAG	HGNC:12852	ENSMUSG00000051391	ENSG00000170027	22628	7532	Cluster 45	Ywhag	YWHAG	IPI00230707	IPI:IPI00230707.6|SWISS-PROT:P61982|ENSEMBL:ENSMUSP00000051223|REFSEQ:NP_061359|VEGA:OTTMUSP00000017492 Tax_Id=10090 Gene_Symbol=Ywhag 14-3-3 protein gamma	P61982	IPI00220642	IPI:IPI00220642.7|SWISS-PROT:P61981|ENSEMBL:ENSP00000306330|REFSEQ:NP_036611|H-INV:HIT000039050|VEGA:OTTHUMP00000024480;OTTHUMP00000067293;OTTHUMP00000161136 Tax_Id=9606 Gene_Symbol=YWHAG 14-3-3 protein gamma	P61981		17	15	13	11	YES	YES
ab16moc_344	YES	YES	Ywhah	MGI:109194	YWHAH	HGNC:12853	ENSMUSG00000018965	ENSG00000128245	22629	7533	Cluster 93	Ywhah	YWHAH	IPI00227392	IPI:IPI00227392.5|SWISS-PROT:P68510|ENSEMBL:ENSMUSP00000019109|REFSEQ:NP_035868|VEGA:OTTMUSP00000017560 Tax_Id=10090 Gene_Symbol=Ywhah 14-3-3 protein eta	P68510	IPI00216319	IPI:IPI00216319.3|SWISS-PROT:Q04917|TREMBL:Q9H4N8|ENSEMBL:ENSP00000248975|REFSEQ:NP_003396|H-INV:HIT000295865|VEGA:OTTHUMP00000028905;OTTHUMP00000063249 Tax_Id=9606 Gene_Symbol=YWHAH 14-3-3 protein eta	Q04917		14	12	7	8	YES	YES
ab16moc_395	YES	YES	Ywhaq	MGI:891963	YWHAQ	HGNC:12854	ENSMUSG00000076432	ENSG00000134308	22630	10971	Cluster 129	Ywhaq	YWHAQ	IPI00656269	IPI:IPI00656269.1|SWISS-PROT:P68254-2|VEGA:OTTMUSP00000017543 Tax_Id=10090 Gene_Symbol=Ywhaq Isoform 2 of 14-3-3 protein theta	P68254	IPI00018146	IPI:IPI00018146.1|SWISS-PROT:P27348|TREMBL:Q53S41|ENSEMBL:ENSP00000238081;ENSP00000371267|REFSEQ:NP_006817|H-INV:HIT000259592|VEGA:OTTHUMP00000015730;OTTHUMP00000165887 Tax_Id=9606 Gene_Symbol=YWHAQ 14-3-3 protein theta	P27348		12	9	10	8	YES	YES
ab16moc_942	YES	YES	Sfn	MGI:1891831	SFN	HGNC:10773	ENSMUSG00000047281	ENSG00000175793	55948	2810	Cluster 783	Sfn	SFN	IPI00118286	IPI:IPI00118286.1|SWISS-PROT:O70456 Tax_Id=10090 Gene_Symbol=Sfn 14-3-3 protein sigma	O70456	IPI00411765	IPI:IPI00411765.3|SWISS-PROT:P31947-2|ENSEMBL:ENSP00000363252 Tax_Id=9606 Gene_Symbol=SFN Isoform 2 of 14-3-3 protein sigma	P31947		4	4	3	2	YES	YES
ab16moc_10	YES	YES	Erc2	MGI:1098749	ERC2	HGNC:31922	ENSMUSG00000040640	ENSG00000187672	238988	26059	Cluster 28	Erc2	ERC2	IPI00460558	IPI:IPI00460558.3|SWISS-PROT:Q6PH08-1|TREMBL:Q5J8K5;Q5J8K6;Q5J8K7|ENSEMBL:ENSMUSP00000078408 Tax_Id=10090 Gene_Symbol=Erc2 Isoform 1 of ERC protein 2	Q6PH08	IPI00472614	IPI:IPI00472614.3|SWISS-PROT:O15083-1|ENSEMBL:ENSP00000288221|REFSEQ:NP_056391|H-INV:HIT000000084|VEGA:OTTHUMP00000171610 Tax_Id=9606 Gene_Symbol=ERC2 Isoform 1 of ERC protein 2	O15083		92	71	68	63	YES	YES
ab16moc_77	YES	YES	Erc1	MGI:2151013	ERC1	HGNC:17072	ENSMUSG00000030172	ENSG00000082805	111173	23085	Cluster 96	Erc1	ERC1	IPI00117731	IPI:IPI00117731.1|SWISS-PROT:Q99MI1-1|ENSEMBL:ENSMUSP00000032279|REFSEQ:NP_444434 Tax_Id=10090 Gene_Symbol=Erc1 Isoform 1 of ELKS/RAB6-interacting/CAST family member 1	Q99MI1	IPI00216719	IPI:IPI00216719.1|SWISS-PROT:Q8IUD2-1|TREMBL:A2RU77|ENSEMBL:ENSP00000354158|REFSEQ:NP_829884|VEGA:OTTHUMP00000082650;OTTHUMP00000160633;OTTHUMP00000166160 Tax_Id=9606 Gene_Symbol=ERC1 Isoform 1 of ELKS/RAB6-interacting/CAST family member 1	Q8IUD2		40	31	27	25	YES	YES
ab16moc_114	YES	YES	Ktn1	MGI:109153	KTN1	HGNC:6467	ENSMUSG00000021843	ENSG00000126777	16709	3895	Cluster 486	Ktn1	KTN1	IPI00760078	IPI:IPI00760078.1|SWISS-PROT:Q61595-9 Tax_Id=10090 Gene_Symbol=Ktn1 Isoform 9 of Kinectin	Q61595	IPI00337736	IPI:IPI00337736.1|SWISS-PROT:Q86UP2-2|TREMBL:Q3SWV9;Q6NZ46;Q6PDF7|ENSEMBL:ENSP00000334083|REFSEQ:NP_004977|VEGA:OTTHUMP00000027997;OTTHUMP00000179012 Tax_Id=9606 Gene_Symbol=KTN1 Isoform 2 of Kinectin	Q86UP2		33	22	13	23	YES
ab16moc_115	YES	YES	Golgb1	MGI:1099447	GOLGB1	HGNC:4429	ENSMUSG00000078096	ENSG00000173230	224139	2804	Cluster 1225	Golgb1	GOLGB1	IPI00665421	IPI:IPI00665421.1|TREMBL:Q3U289;Q9CTU9|ENSEMBL:ENSMUSP00000023534|REFSEQ:XP_001001861;XP_922043 Tax_Id=10090 Gene_Symbol=Golgb1 similar to golgi-associated protein GCP360 isoform 9	Q3U289	IPI00004671	IPI:IPI00004671.2|SWISS-PROT:Q14789|ENSEMBL:ENSP00000341848|REFSEQ:NP_004478|H-INV:HIT000323517|VEGA:OTTHUMP00000172426 Tax_Id=9606 Gene_Symbol=GOLGB1 Golgin subfamily B member 1	Q14789		33	31	11	14	YES
ab16moc_693	YES	YES	Dhx30	MGI:1920081	DHX30	HGNC:16716	ENSMUSG00000032480	ENSG00000132153	72831	22907	Cluster 1903	Dhx30	DHX30	IPI00761204	IPI:IPI00761204.1|SWISS-PROT:Q99PU8-2 Tax_Id=10090 Gene_Symbol=Dhx30 Isoform 2 of Putative ATP-dependent RNA helicase DHX30	Q99PU8	IPI00411733	IPI:IPI00411733.4|SWISS-PROT:Q7L2E3-1|ENSEMBL:ENSP00000343442|REFSEQ:NP_619520|VEGA:OTTHUMP00000164802;OTTHUMP00000170985 Tax_Id=9606 Gene_Symbol=DHX30 Isoform 1 of Putative ATP-dependent RNA helicase DHX30	Q7L2E3		6	2	2	6	YES
ab16moc_538	YES	YES	Grin2d	MGI:95823	GRIN2D	HGNC:4588	ENSMUSG00000002771	ENSG00000105464	14814	2906	Cluster 1747	Grin2d	GRIN2D	IPI00131279	IPI:IPI00131279.1|SWISS-PROT:Q03391|ENSEMBL:ENSMUSP00000002848|REFSEQ:NP_032198|VEGA:OTTMUSP00000025256 Tax_Id=10090 Gene_Symbol=Grin2d Glutamate [NMDA] receptor subunit epsilon-4 precursor	Q03391	IPI00006217	IPI:IPI00006217.1|SWISS-PROT:O15399|TREMBL:Q59G17|ENSEMBL:ENSP00000263269|REFSEQ:NP_000827|H-INV:HIT000221391|VEGA:OTTHUMP00000069226;OTTHUMP00000076777 Tax_Id=9606 Gene_Symbol=GRIN2D Glutamate [NMDA] receptor subunit epsilon-4 precursor	O15399		9	7	5	3	YES	YES
ab16moc_184	YES	YES	Snap25	MGI:98331	SNAP25	HGNC:11132	ENSMUSG00000027273	ENSG00000132639	20614	6616	Cluster 3	Snap25	SNAP25	IPI00125635	IPI:IPI00125635.1|SWISS-PROT:P60879-1|TREMBL:A2AIC2|ENSEMBL:ENSMUSP00000028727|REFSEQ:NP_035558|VEGA:OTTMUSP00000016582 Tax_Id=10090 Gene_Symbol=Snap25 Isoform SNAP-25b of Synaptosomal-associated protein 25	P60879	IPI00010470	IPI:IPI00010470.3|SWISS-PROT:P60880-1|TREMBL:Q53EM2|ENSEMBL:ENSP00000254976|REFSEQ:NP_570824|H-INV:HIT000101100|VEGA:OTTHUMP00000030267;OTTHUMP00000030270 Tax_Id=9606 Gene_Symbol=SNAP25 Isoform SNAP-25b of Synaptosomal-associated protein 25	P60880		23	23	19	17	YES	YES
ab16moc_966	YES	YES	Tmem85	MGI:1915282	TMEM85	HGNC:28032	ENSMUSG00000027131	ENSG00000128463	68032	51234	Cluster 567	Tmem85	TMEM85	IPI00113243	IPI:IPI00113243.1|SWISS-PROT:Q9CZX9|TREMBL:A2AGJ7|ENSEMBL:ENSMUSP00000028551|REFSEQ:NP_080795|VEGA:OTTMUSP00000016120 Tax_Id=10090 Gene_Symbol=Tmem85 Transmembrane protein 85	Q9CZX9	IPI00791782	IPI:IPI00791782.1|VEGA:OTTHUMP00000175607 Tax_Id=9606 Gene_Symbol=TMEM85 8 kDa protein	-		4	4	4	4	YES
ab16moc_1323	YES	YES	Srprb	MGI:102964	SRPRB	HGNC:24085	ENSMUSG00000032553	ENSG00000144867	20818	58477	Cluster 1278	Srprb	SRPRB	IPI00111271	IPI:IPI00111271.1|SWISS-PROT:P47758|TREMBL:Q542X6|ENSEMBL:ENSMUSP00000035157|REFSEQ:NP_033301;XP_984595 Tax_Id=10090 Gene_Symbol=Srprb Signal recognition particle receptor subunit beta	P47758	IPI00295098	IPI:IPI00295098.3|SWISS-PROT:Q9Y5M8|TREMBL:Q549N5;Q6P595|ENSEMBL:ENSP00000273406|REFSEQ:NP_067026|H-INV:HIT000082564|VEGA:OTTHUMP00000172877 Tax_Id=9606 Gene_Symbol=SRPRB Signal recognition particle receptor subunit beta	Q9Y5M8		2	2	2	2	YES
ab16moc_1124	YES	YES	Ly6h	MGI:1346030	LY6H	HGNC:6728	ENSMUSG00000022577	ENSG00000176956	23934	4062	Cluster 592	Ly6h	LY6H	IPI00753569	IPI:IPI00753569.1|SWISS-PROT:Q9WUC3|TREMBL:Q544M1;Q8K356|ENSEMBL:ENSMUSP00000023241|REFSEQ:NP_035967 Tax_Id=10090 Gene_Symbol=Ly6h Lymphocyte antigen 6 complex, locus H	Q9WUC3	IPI00014964	IPI:IPI00014964.5|SWISS-PROT:O94772|TREMBL:Q6IAX0|ENSEMBL:ENSP00000342711|REFSEQ:NP_002338;XP_001130342|H-INV:HIT000040640|VEGA:OTTHUMP00000178385;OTTHUMP00000178386 Tax_Id=9606 Gene_Symbol=LY6H Lymphocyte antigen Ly-6H precursor	O94772		3	3	3	3	YES
ab16moc_322	YES	YES	Rpl4	MGI:1915141	RPL4	HGNC:10353	ENSMUSG00000032399	ENSG00000174444	67891	6124	Cluster 260	Rpl4	RPL4	IPI00111412	IPI:IPI00111412.3|SWISS-PROT:Q9D8E6|TREMBL:Q564E8;Q5ZEY2;Q9CSM5|ENSEMBL:ENSMUSP00000034966|REFSEQ:NP_077174 Tax_Id=10090 Gene_Symbol=Rpl4 60S ribosomal protein L4	Q9D8E6	IPI00003918	IPI:IPI00003918.6|SWISS-PROT:P36578|TREMBL:Q53G74;Q59GY2|ENSEMBL:ENSP00000311430|REFSEQ:NP_000959|H-INV:HIT000304287|VEGA:OTTHUMP00000164249;OTTHUMP00000176421 Tax_Id=9606 Gene_Symbol=RPL4 60S ribosomal protein L4	P36578		15	12	11	11	YES
ab16moc_15	YES	YES	Hk1	MGI:96103	HK1	HGNC:4922	ENSMUSG00000037012	ENSG00000156515	15275	3098	Cluster 38	HK1	HK1	IPI00762858	IPI:IPI00762858.1|TREMBL:Q6GQU1|ENSEMBL:ENSMUSP00000097282 Tax_Id=10090 Gene_Symbol=Hk1 Hk1 protein	Q6GQU1	IPI00018246	IPI:IPI00018246.5|SWISS-PROT:P19367-1|TREMBL:Q71V75|ENSEMBL:ENSP00000352398|REFSEQ:NP_000179|H-INV:HIT000196350|VEGA:OTTHUMP00000019725;OTTHUMP00000060581 Tax_Id=9606 Gene_Symbol=HK1 Isoform 1 of Hexokinase-1	P19367		73	62	52	50	YES	YES
ab16moc_290	YES	YES	Gnb2	MGI:95784	GNB2	HGNC:4398	ENSMUSG00000029711	ENSG00000130427	14693	2783	Cluster 123	Gnb2	GNB2	IPI00162780	IPI:IPI00162780.3|SWISS-PROT:P62880|TREMBL:Q3U9V4|ENSEMBL:ENSMUSP00000031726|REFSEQ:NP_034442|VEGA:OTTMUSP00000017447 Tax_Id=10090 Gene_Symbol=Gnb2 Guanine nucleotide-binding protein G(I)/G(S)/G(T) subunit beta 2	P62880	IPI00003348	IPI:IPI00003348.3|SWISS-PROT:P62879|TREMBL:Q6FHM2|ENSEMBL:ENSP00000305260|REFSEQ:NP_005264|H-INV:HIT000035769|VEGA:OTTHUMP00000025228;OTTHUMP00000041346;OTTHUMP00000174595;OTTHUMP00000174601;OTTHUMP00000174602 Tax_Id=9606 Gene_Symbol=GNB2 Guanine nucleoti	P62879		16	13	14	15	YES	YES
ab16moc_307	YES	YES	Gnb1	MGI:95781	GNB1	HGNC:4396	ENSMUSG00000029064	ENSG00000078369	14688	2782	Cluster 123	Gnb1	GNB1	IPI00120716	IPI:IPI00120716.3|SWISS-PROT:P62874|TREMBL:Q3TQ70;Q3U1B1;Q61621|ENSEMBL:ENSMUSP00000030940|REFSEQ:NP_032168|VEGA:OTTMUSP00000011446 Tax_Id=10090 Gene_Symbol=Gnb1 Guanine nucleotide-binding protein G(I)/G(S)/G(T) subunit beta 1	P62874	IPI00026268	IPI:IPI00026268.3|SWISS-PROT:P62873|TREMBL:Q1RMY8;Q5QPR5|ENSEMBL:ENSP00000367872|REFSEQ:NP_002065|H-INV:HIT000321048|VEGA:OTTHUMP00000001107;OTTHUMP00000044188 Tax_Id=9606 Gene_Symbol=GNB1 Guanine nucleotide-binding protein G(I)/G(S)/G(T) subunit beta 1	P62873		15	14	14	15	YES	YES
[truncated: 1,287 more rows]
