# Supplementary material for: Comparative Study of Human and Mouse Postsynaptic Proteomes Finds High Compositional Conservation and Abundance Differences for Key Synaptic Proteins
Source: PLoS One. 2012 Oct 5;7(10):e46683. doi: 10.1371/journal.pone.0046683 (PMC3465276; doi:10.1371/journal.pone.0046683)
Supplement: Table S2 — Human and Mouse PSD Proteins Abundance. Individual and average abundance values (iBAQ) for mouse and human PSD proteins are given. Data was normalized and log2 transformed. Normalization was achieved by dividing abundance data points by its species abundance average. Abundance fold difference was defined as the ratio of mouse to human average abundance values. To measure significant abundance differences between species a Student's t-test was used. Proteins significantly enriched in one species are shown in separate sheets. The abundance of proteins from the postsynaptic protein complexes shown in figure 1 are also shown in a separate sheet. (XLSX) [file pone.0046683.s002.xlsx]

## Sheet: LEGEND
Table S2. Human and Mouse PSD Proteins Abundance.
Individual and average abundance values (iBAQ) for mouse and human PSD proteins are given. Data was normalized and log2 transformed. Normalization was achieved by dividing abundance data points by its species abundance average. Abundance fold difference was defined as the ratio of mouse to human average abundance values. To measure significant abundance differences between species a Student’s t-t…

## Sheet: All
Appr Gene (m)	MGI ID	Appr Gene (h)	HGNC ID	Ensembl (m)	Ensembl (h)	human ibaq protein group id	mouse ibaq protein group id	iBAQ mPSD01 (Log2, normalised)	iBAQ mPSD02 (Log2, normalised)	iBAQ mPSD03 (Log2, normalised)	iBAQ hPSD01 (Log2, normalised)	iBAQ hPSD02 (Log2, normalised)	iBAQ hPSD03 (Log2, normalised)	iBAQ hPSD average (Log2, normalised)	iBAQ mPSD average (Log2, normalised)	Average fold change (mPSD from hDB/hPSD from mDB)	t-test Significant (Perm 0.01)	t-test p value
Sept2	MGI:97298	SEPT2	HGNC:7729	ENSMUSG00000026276	ENSG00000168385	485	207	3.33614	3.18575	4.17619	3.68731	5.14133	4.50547	4.4447	3.56603	0.543867		0.167353
Sept3	MGI:1345148	SEPT3	HGNC:10750	ENSMUSG00000022456	ENSG00000100167	1858	2331	5.44256	5.2336	5.71745	4.86098	5.08449	5.63505	5.19351	5.46454	1.20667		0.371186
Sept4	MGI:1270156	SEPT4	HGNC:9165	ENSMUSG00000020486	ENSG00000181013	406	2170	1.19287	0.97771	1.01096	0.0194597	-0.253824	-0.0144186	-0.0829275	1.06051	2.20907	+	0.000465884
Sept5	MGI:1195461	SEPT5	HGNC:9164	ENSMUSG00000072214	ENSG00000184702	2308	2408	7.31569	7.5161	7.62552	-1.42597	1.36514	-0.138191	-0.0663415	7.48577	187.678	+	0.000742247
Sept6	MGI:1888939	SEPT6	HGNC:15848	ENSMUSG00000050379	ENSG00000125354	1337	1133	3.24219	4.87404	4.89629	2.79817	3.56231	1.91293	2.7578	4.3375	2.98908		0.0951823
Sept7	MGI:1335094	SEPT7	HGNC:1717	ENSMUSG00000001833	ENSG00000122545	1022	1098	7.57353	7.45713	7.26443	6.9639	7.46631	6.89414	7.10812	7.4317	1.25143		0.183592
Sept8	MGI:894310	SEPT8	HGNC:16511	ENSMUSG00000018398	ENSG00000164402	2128	2371	3.63233	3.21797	3.57532	2.88389	3.25416	2.44915	2.8624	3.47521	1.52923		0.0828547
Sept9	MGI:1858222	SEPT9	HGNC:7323	ENSMUSG00000059248	ENSG00000184640	2294	2083	2.19565	2.19716	2.12452	2.59907	3.30348	2.89823	2.93359	2.17244	0.590025		0.0207694
Sept10	MGI:1918110	SEPT10	HGNC:14349	ENSMUSG00000019917	ENSG00000186522	1828	1317	1.60806	2.8688	2.41726	-1.80125	-0.201385	-1.41912	-1.14059	2.29804	10.8425	+	0.00479371
Sept11	MGI:1277214	SEPT11	HGNC:25589	ENSMUSG00000058013	ENSG00000138758	2456	1862	7.72824	7.15863	7.47978	7.95478	7.9456	8.17949	8.02662	7.45555	0.673116		0.0347802
1810074P20Rik	MGI:1914740	KIAA0776	HGNC:23039	ENSMUSG00000040359	ENSG00000014123	2334	2114	1.20732	1.89922	1.71069	-0.70175	-0.631584	0.670801	-0.220844	1.60574	3.54697		0.0205734
2400001E08Rik	MGI:1913758	LAMTOR1	HGNC:26068	ENSMUSG00000030842	ENSG00000149357	553	1421	0.113397	-0.713332	-0.905763	-0.41334	-0.141976	-1.14634	-0.567219	-0.501899	1.04632		0.88746
2400003C14Rik	MGI:1919205	KIAA0174	HGNC:28977	ENSMUSG00000031729	ENSG00000182149	781	66	0.689891	1.03202	0.449503	0.762249	1.38394	2.0466	1.3976	0.723804	0.626856		0.173596
Aak1	MGI:1098687	AAK1	HGNC:19679	ENSMUSG00000057230	ENSG00000115977	2421	1690	2.66969	2.17367	2.79224	0.914379	0.892719	1.46145	1.08952	2.5452	2.74287	+	0.00537391
Aars	MGI:2384560	AARS	HGNC:20	ENSMUSG00000031960	ENSG00000090861	879	1490	2.66969	-1.09138	-4.90979	-0.852145	-1.11591	-0.430337	-0.799465	-1.11049	0.806067		0.89427
Abcd2	MGI:1349467	ABCD2	HGNC:66	ENSMUSG00000055782	ENSG00000173208	107	1364	-0.642381	-1.12824	-2.41824	-0.777756	-0.3822	-0.580686	-0.580214	-1.39629	0.567986		0.206637
Abcd3	MGI:1349216	ABCD3	HGNC:67	ENSMUSG00000028127	ENSG00000117528	94	864	-1.53997	-1.03971	-1.26571	0.21698	-0.929261	-0.275017	-0.329099	-1.2818	0.516665		0.0581379
Abhd16a	MGI:99476	ABHD16A	HGNC:13921	ENSMUSG00000007036	ENSG00000204427	1024	694	-2.43412	-1.15234	-2.737	-1.34946	-0.819097	-0.405365	-0.857975	-2.10782	0.420493		0.0883414
Abi1	MGI:104913	ABI1	HGNC:11320	ENSMUSG00000058835	ENSG00000136754	2011	1927	4.38886	4.85268	4.93791	2.5191	3.3337	4.33148	3.39476	4.72648	2.51703		0.073056
Abi2	MGI:106913	ABI2	HGNC:24011	ENSMUSG00000026782	ENSG00000138443	2030	1734	2.82866	3.25962	3.21303	1.594	2.98758	3.31533	2.63231	3.10044	1.38332		0.438856
Ablim1	MGI:1194500	ABLIM1	HGNC:78	ENSMUSG00000078103	ENSG00000099204	1776	1688	0.902131	1.55357	1.48906	-0.0615608	1.85996	1.14424	0.980881	1.31492	1.26054		0.606085
Ablim2	MGI:2385758	ABLIM2	HGNC:19195	ENSMUSG00000029095	ENSG00000163995	2017	1136	-2.94919	-1.59723	-1.8466	-2.01674	-0.337714	-0.640471	-0.998308	-2.13101	0.456062		0.162702
Ablim3	MGI:2442582	ABLIM3	HGNC:29132	ENSMUSG00000032735	ENSG00000173210	1305	1989	-1.00031	-0.657536	-0.595734	-3.79749	-2.03376	-2.18347	-2.67157	-0.751193	3.78522		0.0293847
Abr	MGI:107771	ABR	HGNC:81	ENSMUSG00000017631	ENSG00000159842	962	1762	-2.50677	-4.42462	-3.23006	-3.24991	-0.571336	-0.829391	-1.55021	-3.38715	0.279915		0.146093
Acat1	MGI:87870	ACAT1	HGNC:93	ENSMUSG00000032047	ENSG00000075239	961	956	-2.81358	-3.03462	-1.04817	-2.58747	-1.57797	-3.92494	-2.69679	-2.29879	1.31768		0.689412
Acly	MGI:103251	ACLY	HGNC:115	ENSMUSG00000020917	ENSG00000131473	668	577	-1.22029	-0.0661905	-0.191888	-0.444003	-0.947082	0.0652564	-0.441943	-0.492791	0.965369		0.918715
Aco2	MGI:87880	ACO2	HGNC:118	ENSMUSG00000022477	ENSG00000100412	582	240	-2.41684	-1.37017	-2.37179	1.86183	2.76029	1.61324	2.07845	-2.05293	0.0570596	+	0.00106632
Acsl3	MGI:1921455	ACSL3	HGNC:3570	ENSMUSG00000032883	ENSG00000123983	983	977	-3.38035	-1.00975	-1.42225	-0.858289	-0.744121	-0.0487495	-0.550387	-1.93745	0.382342		0.147488
Acsl6	MGI:894291	ACSL6	HGNC:16496	ENSMUSG00000020333	ENSG00000164398	2225	2145	-3.00841	-2.19703	-2.54264	-1.48562	-1.79984	-2.5163	-1.93392	-2.58269	0.637821		0.167309
Actn1	MGI:2137706	ACTN1	HGNC:163	ENSMUSG00000015143	ENSG00000072110	2268	1720	4.86693	5.06675	5.66568	3.14355	3.68354	3.39	3.4057	5.19979	3.46797	+	0.0033079
Actn2	MGI:109192	ACTN2	HGNC:164	ENSMUSG00000052374	ENSG00000077522	628	1755	3.24273	3.19671	3.87415	2.56392	3.20781	3.3064	3.02604	3.43786	1.33036		0.266674
Actn4	MGI:1890773	ACTN4	HGNC:166	ENSMUSG00000054808	ENSG00000130402	469	329	1.0384	0.685237	1.10498	-0.565013	-0.259405	-1.19729	-0.673904	0.942874	3.06689		0.00610758
Actr1a	MGI:1858964	ACTR1A	HGNC:167	ENSMUSG00000025228	ENSG00000138107	937	175	-0.20559	0.329981	0.806114	0.902485	1.96323	1.91259	1.59277	0.310168	0.411054		0.047122
Actr1b	MGI:1917446	ACTR1B	HGNC:168	ENSMUSG00000037351	ENSG00000115073	938	952	0.343026	-0.375608	0.517975	-0.26412	-0.0261919	1.22343	0.311039	0.161798	0.901725		0.794579
Actr2	MGI:1913963	ACTR2	HGNC:169	ENSMUSG00000020152	ENSG00000213985	178	1004	1.41634	3.27683	2.2205	1.29151	1.4308	1.86705	1.52979	2.30456	1.71092		0.242828
Actr3	MGI:1921367	ACTR3	HGNC:170	ENSMUSG00000026341	ENSG00000115091	898	223	0.225477	1.8997	1.5245	2.15884	1.70269	2.52134	2.12762	1.21656	0.531792		0.178969
Adam23	MGI:1345162	ADAM23	HGNC:202	ENSMUSG00000025964	ENSG00000114948	689	651	0.036082	0.707946	0.359886	-1.87559	-2.24883	-1.94223	-2.02222	0.367971	5.24226	+	0.000448255
Add1	MGI:87918	ADD1	HGNC:243	ENSMUSG00000029106	ENSG00000087274	630	875	2.82712	2.66459	2.42652	2.9339	3.12033	2.88601	2.98008	2.63941	0.789676		0.0671103
Add2	MGI:87919	ADD2	HGNC:244	ENSMUSG00000030000	ENSG00000075340	631	1517	1.98357	2.1615	1.91654	2.58347	1.9827	2.25172	2.27263	2.02053	0.839675		0.252059
Add3	MGI:1351615	ADD3	HGNC:245	ENSMUSG00000025026	ENSG00000148700	1490	1756	-1.54207	-1.7112	-1.19037	-0.277864	0.483572	-0.357005	-0.0504325	-1.48121	0.37093		0.00978004
Adrbk1	MGI:87940	ADRBK1	HGNC:289	ENSMUSG00000024858	ENSG00000173020	431	1485	-1.83256	-0.499582	-0.397541	-2.89564	-0.696771	-3.58231	-2.39157	-0.909896	2.79273		0.207122
Afg3l2	MGI:1916847	AFG3L2	HGNC:315	ENSMUSG00000024527	ENSG00000141385	64	992	-0.874641	-1.26141	-1.31265	0.0227252	0.0676057	-0.833596	-0.247755	-1.14957	0.535214		0.0497206
Agap2	MGI:3580016	AGAP2	HGNC:16921	ENSMUSG00000025422	ENSG00000135439	1375	1671	2.06542	2.24697	2.03063	-0.0536292	0.255806	0.597287	0.266488	2.11434	3.59965	+	0.000756764
Agk	MGI:1917173	AGK	HGNC:21869	ENSMUSG00000029916	ENSG00000006530	616	169	-5.60295	-2.80516	0.322492	0.0929126	-3.85333	-3.27343	-2.34461	-2.69521	0.784261		0.875959
Ahcyl1	MGI:2385184	AHCYL1	HGNC:344	ENSMUSG00000027893	ENSG00000168710	1287	963	1.35701	1.42666	1.70661	0.613439	0.576526	1.89443	1.02813	1.49676	1.38379		0.352915
Aifm3	MGI:1919418	AIFM3	HGNC:26398	ENSMUSG00000022763	ENSG00000183773	1041	1392	-0.400768	-0.299269	-0.0606994	-2.06582	-3.72508	-3.36784	-3.05292	-0.253579	6.96121	+	0.00552747
Aldoa	MGI:87994	ALDOA	HGNC:414	ENSMUSG00000030695	ENSG00000149925	2076	1012	6.12969	6.25881	6.54887	5.56691	6.08477	6.46349	6.03839	6.31246	1.20921		0.395035
Amph	MGI:103574	AMPH	HGNC:471	ENSMUSG00000021314	ENSG00000078053	1718	1776	1.65244	1.16974	1.27928	1.67016	1.88684	1.84642	1.80114	1.36716	0.740212		0.0539074
Ank1	MGI:88024	ANK1	HGNC:492	ENSMUSG00000031543	ENSG00000029534	2220	367	-1.19751	-0.343493	-1.17896	4.45651	2.69987	1.56628	2.90755	-0.906655	0.0710901		0.0126294
Ank2	MGI:88025	ANK2	HGNC:493	ENSMUSG00000032826	ENSG00000145362	1096	1153	3.96933	3.82439	3.69276	2.89217	3.80869	3.69175	3.4642	3.82883	1.28755		0.289475
Ank3	MGI:88026	ANK3	HGNC:494	ENSMUSG00000069601	ENSG00000151150	2426	2133	0.297275	0.563458	0.413881	0.175515	0.111245	0.520473	0.269078	0.424871	1.11403		0.353586
Anks1b	MGI:1924781	ANKS1B	HGNC:24600	ENSMUSG00000058589	ENSG00000185046	2042	2205	5.52598	5.94121	5.5934	0.73973	1.67261	1.68795	1.36676	5.68686	19.9747	+	0.000218239
Ap1b1	MGI:1096368	AP1B1	HGNC:554	ENSMUSG00000009090	ENSG00000100280	1750	2160	0.986363	0.345251	0.491585	-0.289208	-1.21002	-0.00486076	-0.501361	0.607733	2.1571		0.0546207
Ap1s1	MGI:1098244	AP1S1	HGNC:559	ENSMUSG00000004849	ENSG00000106367	1156	304	-2.27454	-2.48246	-2.49398	-0.438828	0.16007	-0.0762454	-0.118335	-2.41699	0.203252	+	0.000257943
Ap2a1	MGI:101921	AP2A1	HGNC:561	ENSMUSG00000060279	ENSG00000196961	1522	44	4.84162	5.0854	5.5848	3.82706	4.21992	3.89182	3.9796	5.17061	2.28312		0.00891096
Ap2a2	MGI:101920	AP2A2	HGNC:562	ENSMUSG00000002957	ENSG00000183020	2417	2253	3.42781	3.54591	4.56393	2.37244	2.56029	2.09234	2.34169	3.84588	2.83666		0.0174996
Ap2b1	MGI:1919020	AP2B1	HGNC:563	ENSMUSG00000035152	ENSG00000006125	2289	362	5.09073	5.0457	5.68931	4.2845	4.56512	4.32315	4.39092	5.27525	1.8459		0.0171635
Ap2m1	MGI:1298405	AP2M1	HGNC:564	ENSMUSG00000022841	ENSG00000161203	704	253	4.95372	5.32067	5.28746	4.91071	5.40323	4.51519	4.94304	5.18728	1.18447		0.435785
Ap2s1	MGI:2141861	AP2S1	HGNC:565	ENSMUSG00000008036	ENSG00000042753	1451	303	2.91194	2.50177	3.02227	2.49741	3.20922	2.61902	2.77521	2.81199	1.02582		0.898566
Ap3b2	MGI:1100869	AP3B2	HGNC:567	ENSMUSG00000062444	ENSG00000103723	204	1863	-2.87549	-2.39519	-2.40253	0.0237442	-0.811207	-0.531856	-0.439773	-2.55774	0.230372	+	0.00192655
Ap3m2	MGI:1929214	AP3M2	HGNC:570	ENSMUSG00000031539	ENSG00000070718	728	514	-4.56147	-2.60722	-3.72499	-0.942709	-0.304621	-0.26616	-0.504497	-3.63123	0.114488		0.00674378
Ap3s1	MGI:1337062	AP3S1	HGNC:2013	ENSMUSG00000024480	ENSG00000177879	502	1505	-3.57404	-4.02257	-5.29535	-2.79792	-1.69602	-3.4547	-2.64955	-4.29732	0.319132		0.0861577
Ap3s2	MGI:1337060	AP3S2	HGNC:571	ENSMUSG00000063801	ENSG00000157823	804	469	-2.05224	-2.9684	-3.36439	-2.44682	-2.65817	-2.75431	-2.61977	-2.79501	0.885618		0.683232
Apoe	MGI:88057	APOE	HGNC:613	ENSMUSG00000002985	ENSG00000130203	685	1526	-2.59433	-2.49701	-3.73663	-1.69939	-1.12957	-1.72673	-1.51857	-2.94266	0.372654		0.0324526
Arf1	MGI:99431	ARF1	HGNC:652	ENSMUSG00000048076	ENSG00000143761	1321	1026	-0.599314	-2.60395	-5.06138	0.75569	0.564194	-1.21452	0.03512	-2.75488	0.144586		0.123711
Arf3	MGI:99432	ARF3	HGNC:654	ENSMUSG00000051853	ENSG00000134287	1321	1026	-0.599314	-2.60395	-5.06138	0.75569	0.564194	-1.21452	0.03512	-2.75488	0.144586		0.123711
Arf5	MGI:99434	ARF5	HGNC:658	ENSMUSG00000020440	ENSG00000004059	1323	1027	-1.33083	-2.00889	-2.97724	-1.65541	-2.77836	-2.6903	-2.37469	-2.10565	1.205		0.676344
Arhgap21	MGI:1918685	ARHGAP21	HGNC:23725	ENSMUSG00000036591	ENSG00000107863	1216	2239	-1.34684	-1.62435	-1.20767	-2.02893	-1.19548	-1.1152	-1.44654	-1.39295	1.03784		0.873883
Arhgap23	MGI:3697726	ARHGAP23	HGNC:29293	ENSMUSG00000049807	ENSG00000214627	1113	2157	-0.364175	-0.972113	-1.25404	-2.78088	-2.05314	-2.48554	-2.43985	-0.863444	2.98226		0.00946753
Arhgap26	MGI:1918552	ARHGAP26	HGNC:17073	ENSMUSG00000036452	ENSG00000145819	285	2120	-1.21401	-1.19601	-0.918349	-1.71033	-1.08999	-2.72771	-1.84268	-1.10946	1.66235		0.206538
Arhgap33	MGI:2673998	ARHGAP33	HGNC:23085	ENSMUSG00000036882	ENSG00000004777	2126	1284	-1.25801	-1.7143	-2.80254	-2.78665	-1.93799	-2.43601	-2.38688	-1.92495	1.37739		0.42464
Arhgap39	MGI:107858	ARHGAP39	HGNC:29351	ENSMUSG00000033697	ENSG00000147799	2052	1670	-1.12689	-1.93188	-1.34946	-4.6344	-4.07983	-2.98077	-3.89833	-1.46941	5.38492		0.0109744
Arhgap44	MGI:2144423	ARHGAP44	HGNC:29096	ENSMUSG00000033389	ENSG00000006740	2254	634	-0.995145	-0.974218	-0.368099	-2.80929	-1.37847	-1.84559	-2.01111	-0.779154	2.34886		0.0582992
Arhgef2	MGI:103264	ARHGEF2	HGNC:682	ENSMUSG00000028059	ENSG00000116584	1557	1375	0.588132	0.539442	0.235209	0.394251	-0.35174	0.0832121	0.0419076	0.454261	1.33086		0.164798
Arpc2	MGI:1923959	ARPC2	HGNC:705	ENSMUSG00000006304	ENSG00000163466	179	2196	-0.775294	-0.445103	-0.963625	-0.0316582	-0.534465	-1.22218	-0.596101	-0.728007	0.912625		0.743984
Arpc3	MGI:1928375	ARPC3	HGNC:706	ENSMUSG00000029465	ENSG00000111229	180	534	-0.042297	0.0089413	0.108703	0.0154904	0.701404	-1.10909	-0.130732	0.0251156	1.11408		0.783185
Arpc4	MGI:1915339	ARPC4	HGNC:707	ENSMUSG00000079426	ENSG00000214021	2155	926	0.742666	0.320856	0.0828444	0.534196	1.20129	-0.430849	0.434879	0.382122	0.964092		0.922821
Atad1	MGI:1915229	ATAD1	HGNC:25903	ENSMUSG00000013662	ENSG00000138138	1234	38	-1.28146	-2.16832	-2.1016	-0.263424	-1.50286	-1.55213	-1.10614	-1.85046	0.596948		0.217453
Atad3a	MGI:1919214	ATAD3A	HGNC:25567	ENSMUSG00000029036	ENSG00000215744	1618	590	-0.359464	-0.909358	-0.729129	0.126728	0.187553	-0.745147	-0.143622	-0.665984	0.696231		0.201379
Atp13a1	MGI:2180801	ATP13A1	HGNC:24215	ENSMUSG00000031862	ENSG00000105726	1034	82	-1.54338	-3.3804	-1.9609	-4.16194	-3.84993	-5.13885	-4.38357	-2.29489	4.25359		0.0369257
Atp1a1	MGI:88105	ATP1A1	HGNC:799	ENSMUSG00000033161	ENSG00000163399	223	1387	2.40688	2.56418	2.51606	2.91525	2.19466	2.51855	2.54282	2.49571	0.967876		0.836183
Atp1a2	MGI:88106	ATP1A2	HGNC:800	ENSMUSG00000007097	ENSG00000018625	116	1869	1.50009	0.902955	1.67203	1.55971	0.983394	1.07061	1.20457	1.35836	1.11248		0.628634
Atp1a3	MGI:88107	ATP1A3	HGNC:801	ENSMUSG00000040907	ENSG00000105409	1691	435	6.03682	5.90293	6.00274	5.51948	5.16056	5.6291	5.43638	5.98083	1.45847		0.0208062
Atp1b1	MGI:88108	ATP1B1	HGNC:804	ENSMUSG00000026576	ENSG00000143153	2260	422	4.22041	4.27549	3.76273	4.71709	4.1394	5.03494	4.63048	4.08621	0.685738		0.152372
Atp1b2	MGI:88109	ATP1B2	HGNC:805	ENSMUSG00000041329	ENSG00000129244	1594	496	0.47874	0.0284823	0.523792	2.26503	1.94312	2.39971	2.20262	0.343672	0.275677	+	0.000870188
Atp2a2	MGI:88110	ATP2A2	HGNC:812	ENSMUSG00000029467	ENSG00000174437	1257	1641	1.5487	2.29236	2.41564	0.712538	1.07816	0.828882	0.873194	2.08557	2.31719		0.0141503
Atp2b1	MGI:104653	ATP2B1	HGNC:814	ENSMUSG00000019943	ENSG00000070961	678	2107	1.86171	1.97843	2.15236	1.28668	0.959346	1.44305	1.22969	1.9975	1.70268		0.00976975
Atp2b2	MGI:105368	ATP2B2	HGNC:815	ENSMUSG00000030302	ENSG00000157087	343	606	3.09102	2.9111	3.07087	1.8355	0.664126	1.51344	1.33769	3.02433	3.21906		0.0088742
Atp2b3	MGI:1347353	ATP2B3	HGNC:816	ENSMUSG00000031376	ENSG00000067842	134	1287	-1.36376	-1.16583	-2.75471	-2.38148	-2.85735	-1.49191	-2.24358	-1.76143	1.39682		0.493368
Atp5a1	MGI:88115	ATP5A1	HGNC:823	ENSMUSG00000025428	ENSG00000152234	2024	690	5.08365	5.41636	4.31571	5.82731	5.4147	5.07742	5.43981	4.93857	0.7065		0.269589
Atp5b	MGI:107801	ATP5B	HGNC:830	ENSMUSG00000025393	ENSG00000110955	1699	2033	6.83131	6.84309	6.00235	6.34775	7.2395	5.82812	6.47179	6.55892	1.06225		0.869427
Atp5d	MGI:1913293	ATP5D	HGNC:837	ENSMUSG00000003072	ENSG00000099624	794	1902	0.85696	-0.232193	0.377097	1.14413	1.26735	-0.253379	0.719369	0.333955	0.765559		0.543139
Atp5o	MGI:106341	ATP5O	HGNC:850	ENSMUSG00000022956	ENSG00000159186	267	334	-2.24496	-1.15684	-1.44136	-1.61857	0.268551	-1.10709	-0.819036	-1.61439	0.576203		0.288817
Atp6v0a1	MGI:103286	ATP6V0A1	HGNC:865	ENSMUSG00000019302	ENSG00000033627	2243	1183	6.14347	5.58321	5.99848	3.52519	4.54568	2.97998	3.68362	5.90839	4.67436		0.0103924
Atp6v0d1	MGI:1201778	ATP6V0D1	HGNC:13724	ENSMUSG00000013160	ENSG00000159720	1033	1408	5.23936	4.33105	5.24508	3.97694	3.10832	4.0464	3.71056	4.9385	2.34233		0.045564
Atp6v1a	MGI:1201780	ATP6V1A	HGNC:851	ENSMUSG00000052459	ENSG00000114573	271	1821	5.41454	5.42977	5.50978	4.51802	4.97592	5.002	4.83198	5.45136	1.53622		0.0179438
Atp6v1b2	MGI:109618	ATP6V1B2	HGNC:854	ENSMUSG00000006273	ENSG00000147416	283	341	4.71014	4.95622	4.15013	3.16694	4.18997	3.91997	3.75896	4.60549	1.79818		0.094586
Atp6v1c1	MGI:1913585	ATP6V1C1	HGNC:856	ENSMUSG00000022295	ENSG00000155097	284	687	2.48689	2.30254	2.69796	1.73244	1.33482	2.45432	1.84053	2.4958	1.57491		0.131999
Atp6v1d	MGI:1921084	ATP6V1D	HGNC:13527	ENSMUSG00000021114	ENSG00000100554	70	321	1.80109	1.59668	1.23353	1.27218	1.35305	0.659118	1.09478	1.54377	1.36508		0.177683
Atp6v1e1	MGI:894326	ATP6V1E1	HGNC:857	ENSMUSG00000019210	ENSG00000131100	139	342	5.10982	4.78851	4.10443	2.15373	4.21883	3.79546	3.38934	4.66759	2.42544		0.140186
Atp6v1f	MGI:1913394	ATP6V1F	HGNC:16832	ENSMUSG00000004285	ENSG00000128524	160	1436	-0.329037	-1.12096	-0.886014	0.62498	-1.0366	0.578873	0.0557525	-0.77867	0.560808		0.233222
Atp6v1g2	MGI:1913487	ATP6V1G2	HGNC:862	ENSMUSG00000024403	ENSG00000213760	1001	501	4.39413	3.19677	3.90256	2.93401	3.80756	3.53996	3.42718	3.83115	1.32315		0.403687
Atp6v1h	MGI:1914864	ATP6V1H	HGNC:18303	ENSMUSG00000033793	ENSG00000047249	1621	1383	3.61774	3.86334	3.93625	3.77091	5.16628	3.95348	4.29689	3.80578	0.711477		0.334881
Atp8a1	MGI:1330848	ATP8A1	HGNC:13531	ENSMUSG00000037685	ENSG00000124406	1010	146	-0.936304	-1.1224	-1.50745	-0.168523	-0.609922	-0.295793	-0.358079	-1.18872	0.56228		0.0176229
Atp9a	MGI:1330826	ATP9A	HGNC:13540	ENSMUSG00000027546	ENSG00000054793	775	256	-3.11261	-2.34758	-2.45049	-2.32079	-2.92517	-3.46421	-2.90339	-2.63689	1.20289		0.54935
Auh	MGI:1338011	AUH	HGNC:890	ENSMUSG00000021460	ENSG00000148090	580	539	0.0432162	0.523869	0.49455	0.792145	-0.489051	-1.98314	-0.560014	0.353879	1.88412		0.325893
AW555464	MGI:2145043	KIAA0284	HGNC:20362	ENSMUSG00000072825	ENSG00000099814	1276	1733	-6.47986	-4.03421	-3.52715	-4.65085	-3.8358	-4.1964	-4.22769	-4.68041	0.730664		0.655763
Bag5	MGI:1917619	BAG5	HGNC:941	ENSMUSG00000049792	ENSG00000166170	276	1212	-1.48341	-0.647818	-1.66825	-1.12365	0.192609	1.35039	0.139782	-1.26649	0.377285		0.145971
Bai1	MGI:1933736	BAI1	HGNC:943	ENSMUSG00000034730	ENSG00000181790	710	1205	-2.19799	-2.78642	-2.39035	-4.40966	-2.67409	-4.70484	-3.92953	-2.45825	2.77267		0.0885933
Baiap2	MGI:2137336	BAIAP2	HGNC:947	ENSMUSG00000025372	ENSG00000175866	1275	530	5.27033	5.90651	5.59944	3.08925	4.11323	4.72108	3.97452	5.59209	3.06858		0.0338729
Bcas1	MGI:1924210	BCAS1	HGNC:974	ENSMUSG00000013523	ENSG00000064787	811	2421	-5.49504	-7.42846	-6.8699	-0.5698	0.385207	-3.68935	-1.29131	-6.5978	0.025269		0.0174217
Bckdk	MGI:1276121	BCKDK	HGNC:16902	ENSMUSG00000030802	ENSG00000103507	1073	212	-2.5381	-2.30026	-2.19793	-1.80196	-2.18869	-1.75822	-1.91629	-2.34543	0.742704		0.0649434
Bcr	MGI:88141	BCR	HGNC:1014	ENSMUSG00000009681	ENSG00000186716	161	1728	-0.828218	-2.12652	-1.23539	-3.43086	-1.98648	-1.85633	-2.42456	-1.39671	2.03898		0.180114
Begain	MGI:3044626	BEGAIN	HGNC:24163	ENSMUSG00000040867	ENSG00000183092	386	1732	0.708434	1.3205	0.943353	-2.24287	-1.66181	-3.27086	-2.39185	0.990762	10.4296	+	0.00254796
Bin1	MGI:108092	BIN1	HGNC:1052	ENSMUSG00000024381	ENSG00000136717	1308	185	0.2033	0.899894	0.725187	0.465245	1.23415	0.0482582	0.58255	0.60946	1.01883		0.950272
Brsk1	MGI:2685946	BRSK1	HGNC:18994	ENSMUSG00000035390	ENSG00000160469	1145	2087	0.0641638	0.0893155	0.628257	-1.21493	-0.74545	-1.13332	-1.03123	0.260579	2.44836	+	0.00526836
Brsk2	MGI:1923020	BRSK2	HGNC:11405	ENSMUSG00000053046	ENSG00000174672	908	2012	-2.51263	-2.28389	-2.66242	-5.02213	-3.64626	-3.951	-4.20646	-2.48631	3.2947		0.0163116
Bsn	MGI:1277955	BSN	HGNC:1117	ENSMUSG00000032589	ENSG00000164061	639	826	0.789416	1.50025	0.809657	-1.10563	-0.207599	-1.06279	-0.792003	1.03311	3.54335		0.0081863
Btbd17	MGI:1919264	BTBD17	HGNC:33758	ENSMUSG00000000202	ENSG00000204347	1824	343	1.7711	2.21381	2.39518	-0.731495	-1.06558	0.388313	-0.469586	2.1267	6.04727	+	0.00553764
C85492	MGI:2143424	C3orf39	HGNC:25902	ENSMUSG00000066235	ENSG00000144647	1231	1588	-4.04672	-3.60639	-3.6492	-2.81423	-2.90711	-2.68351	-2.80161	-3.76744	0.511987	+	0.00333601
Cacna1a	MGI:109482	CACNA1A	HGNC:1388	ENSMUSG00000034656	ENSG00000141837	425	1833	-0.926441	-1.31095	-0.292593	-2.02744	-2.02381	-4.0634	-2.70489	-0.843327	3.634		0.0659746
Cacna2d1	MGI:88295	CACNA2D1	HGNC:1399	ENSMUSG00000073202	ENSG00000153956	2082	1474	2.67423	1.88715	2.34173	0.981156	1.24441	1.02198	1.08252	2.30104	2.32708		0.00734342
Cacna2d2	MGI:1929813	CACNA2D2	HGNC:1400	ENSMUSG00000010066	ENSG00000007402	1943	106	-1.85659	-2.93209	-1.74292	-3.10969	-4.00134	-3.74789	-3.61964	-2.1772	2.71781		0.0355677
Cacna2d3	MGI:1338890	CACNA2D3	HGNC:15460	ENSMUSG00000021991	ENSG00000157445	1687	689	1.36497	0.648437	0.569731	-3.58515	-4.64642	-6.48239	-4.90465	0.861046	54.4062	+	0.00284481
Cacnb1	MGI:102522	CACNB1	HGNC:1401	ENSMUSG00000020882	ENSG00000067191	1297	1501	-0.927077	-0.428416	-1.16853	-3.36895	-2.07296	-3.47802	-2.97331	-0.84134	4.38316		0.0131129
Cacnb3	MGI:103307	CACNB3	HGNC:1403	ENSMUSG00000003352	ENSG00000167535	188	2303	0.616185	0.896635	0.757438	-2.32851	-2.51356	-0.580938	-1.80767	0.756752	5.91518		0.0144988
Cacnb4	MGI:103301	CACNB4	HGNC:1404	ENSMUSG00000017412	ENSG00000182389	397	2148	0.995684	1.38663	1.22212	-2.52201	-1.56221	-0.904572	-1.66293	1.20148	7.28238	+	0.00405499
Cacng2	MGI:1316660	CACNG2	HGNC:1406	ENSMUSG00000055844	ENSG00000166862	82	783	-0.456452	-0.267329	0.385324	-0.950213	-2.17424	-1.31708	-1.48051	-0.112819	2.58057		0.0367525
Cadps	MGI:1350922	CADPS	HGNC:1426	ENSMUSG00000054423	ENSG00000163618	1634	1547	-2.28509	-1.76356	-2.33064	-0.842977	-0.640683	-0.0843648	-0.522675	-2.12643	0.329019	+	0.00527234
Calm1	MGI:88251	CALM1	HGNC:1442	ENSMUSG00000001175	ENSG00000160014	1097	2283	-2.69387	-3.91121	-1.35862	-0.656783	0.00561273	-0.390962	-0.347377	-2.65457	0.202053		0.0388397
Calm2	MGI:103250	CALM2	HGNC:1445	ENSMUSG00000036438	ENSG00000143933	1097	2283	-2.69387	-3.91121	-1.35862	-0.656783	0.00561273	-0.390962	-0.347377	-2.65457	0.202053		0.0388397
Calm3	MGI:103249	CALM3	HGNC:1449	ENSMUSG00000019370	ENSG00000160014	1097	2283	-2.69387	-3.91121	-1.35862	-0.656783	0.00561273	-0.390962	-0.347377	-2.65457	0.202053		0.0388397
Camk2a	MGI:88256	CAMK2A	HGNC:1460	ENSMUSG00000024617	ENSG00000070808	2376	2122	7.83959	8.6801	8.26824	8.02513	8.42726	8.35261	8.26833	8.26265	0.996065		0.984332
Camk2b	MGI:88257	CAMK2B	HGNC:1461	ENSMUSG00000057897	ENSG00000058404	1805	2075	5.70316	6.30548	6.1536	3.04009	4.20741	5.65135	4.29961	6.05408	3.37401		0.0867514
Camk2d	MGI:1341265	CAMK2D	HGNC:1462	ENSMUSG00000053819	ENSG00000145349	2217	1819	1.69745	2.21235	1.81653	0.892212	2.31226	3.07317	2.09255	1.90877	0.880397		0.7938
Camk2g	MGI:88259	CAMK2G	HGNC:1463	ENSMUSG00000021820	ENSG00000148660	2403	526	2.74739	3.74786	3.27702	-2.43582	-2.47939	-0.822434	-1.91255	3.25742	36.0012	+	0.00111001
Camkv	MGI:2384296	CAMKV	HGNC:28788	ENSMUSG00000032936	ENSG00000164076	1708	451	-2.24673	-1.15369	-1.25671	-2.48341	-2.8024	-5.39102	-3.55895	-1.55238	4.01825		0.111147
Cand1	MGI:1261820	CAND1	HGNC:30688	ENSMUSG00000020114	ENSG00000111530	1106	2398	-1.51281	-0.82921	-1.02017	0.45398	0.13021	0.113171	0.232454	-1.12073	0.391427	+	0.00429665
Cap2	MGI:1914502	CAP2	HGNC:20039	ENSMUSG00000021373	ENSG00000112186	872	127	-2.42435	-1.54552	-2.34072	0.882741	-0.0697946	2.1226	0.978516	-2.10353	0.11809		0.0113105
Capn5	MGI:1100859	CAPN5	HGNC:1482	ENSMUSG00000035547	ENSG00000149260	2193	208	-1.66532	-1.44097	-1.93747	-1.9893	-1.29348	-1.75266	-1.67848	-1.68125	0.99808		0.99167
Capza2	MGI:106222	CAPZA2	HGNC:1490	ENSMUSG00000015733	ENSG00000198898	837	114	4.94927	4.76024	4.63936	4.03601	3.81619	4.58008	4.14409	4.78296	1.5571		0.0591025
Capzb	MGI:104652	CAPZB	HGNC:1491	ENSMUSG00000028745	ENSG00000077549	2187	1300	2.75188	3.28648	2.24433	2.97957	3.14584	2.95886	3.02809	2.7609	0.830936		0.432738
Cask	MGI:1309489	CASK	HGNC:1497	ENSMUSG00000031012	ENSG00000147044	2120	354	0.696734	0.633543	1.4858	0.0761549	0.714294	0.865496	0.551981	0.938691	1.30741		0.349835
Caskin1	MGI:2442952	CASKIN1	HGNC:20879	ENSMUSG00000033597	ENSG00000167971	1873	1844	1.88572	1.25882	1.53847	0.0173333	0.430848	0.957022	0.468401	1.561	2.13258		0.0287533
Ccdc127	MGI:1914683	CCDC127	HGNC:30520	ENSMUSG00000021578	ENSG00000164366	1063	749	-0.527125	-2.16487	-2.68248	-0.673994	-1.26714	-4.71223	-2.21779	-1.79149	1.34378		0.778467
Ccny	MGI:1915224	CCNY	HGNC:23354	ENSMUSG00000024286	ENSG00000108100	2077	1347	0.936282	-0.374634	0.752893	-1.36346	-0.869079	-1.70222	-1.31159	0.43818	3.36305		0.0212653
Cct2	MGI:107186	CCT2	HGNC:1615	ENSMUSG00000034024	ENSG00000166226	1638	1480	1.3716	1.67587	1.2866	1.5723	0.961939	1.79397	1.44274	1.44469	1.00135		0.994681
Cct3	MGI:104708	CCT3	HGNC:1616	ENSMUSG00000001416	ENSG00000163468	1549	249	0.979007	1.27641	1.54099	0.917694	1.16721	1.83452	1.30648	1.26547	0.971974		0.903668
Cct4	MGI:104689	CCT4	HGNC:1617	ENSMUSG00000007739	ENSG00000115484	1693	246	1.13605	1.59621	2.17584	0.168382	1.92824	2.2463	1.44764	1.63603	1.13949		0.804602
Cct5	MGI:107185	CCT5	HGNC:1618	ENSMUSG00000022234	ENSG00000150753	380	247	-0.19327	0.115279	0.659583	0.358385	-0.647601	0.470156	0.0603132	0.193864	1.09699		0.773726
Cct6a	MGI:107943	CCT6A	HGNC:1620	ENSMUSG00000029447	ENSG00000146731	885	248	1.42341	1.07666	1.8055	0.993711	1.56906	2.09205	1.55161	1.43519	0.922477		0.774996
Cct7	MGI:107184	CCT7	HGNC:1622	ENSMUSG00000030007	ENSG00000135624	598	1587	1.03539	0.900755	1.40977	0.767733	0.486251	1.24476	0.832914	1.11531	1.21621		0.352562
Cct8	MGI:107183	CCT8	HGNC:1623	ENSMUSG00000025613	ENSG00000156261	1692	2048	2.89194	3.36678	2.52749	1.51545	1.45566	1.87731	1.61614	2.92874	2.48388		0.00897638
Cdc42	MGI:106211	CDC42	HGNC:1736	ENSMUSG00000006699	ENSG00000070831	258	380	0.291715	0.301038	0.187872	0.4302	0.15464	-1.64541	-0.353524	0.260208	1.53021		0.399735
Cdc42bpb	MGI:2136459	CDC42BPB	HGNC:1738	ENSMUSG00000021279	ENSG00000198752	2101	197	-0.561097	-0.323322	-1.05111	-1.48492	-1.24537	-1.783	-1.50443	-0.645176	1.8141		0.0315059
Cdc42ep4	MGI:1929760	CDC42EP4	HGNC:17147	ENSMUSG00000041598	ENSG00000179604	522	540	-1.6033	-3.39196	-4.04481	-1.25915	-0.839027	-2.25649	-1.45156	-3.01335	0.338729		0.137278
Cdh10	MGI:107436	CDH10	HGNC:1749	ENSMUSG00000022321	ENSG00000040731	1608	1667	-1.0096	-0.784608	-0.932961	-1.32861	-1.42	-1.85124	-1.53328	-0.909057	1.54138		0.0230805
Cdh13	MGI:99551	CDH13	HGNC:1753	ENSMUSG00000031841	ENSG00000140945	765	2299	2.78021	2.03934	2.2104	1.60685	2.52437	1.23583	1.78901	2.34332	1.46846		0.279625
Cdh2	MGI:88355	CDH2	HGNC:1759	ENSMUSG00000024304	ENSG00000170558	1540	2234	2.44145	2.98977	1.79955	-0.687071	1.61653	1.19915	0.709538	2.41026	3.25063		0.0969817
Cdh4	MGI:99218	CDH4	HGNC:1763	ENSMUSG00000074518	ENSG00000179242	763	736	-2.92339	-2.67372	-4.07043	-3.14495	-2.97238	-2.08469	-2.734	-3.22251	0.712762		0.417703
Cdk5	MGI:101765	CDK5	HGNC:1774	ENSMUSG00000028969	ENSG00000164885	751	1361	-0.28718	0.82381	0.582818	0.503672	0.76116	1.19708	0.820636	0.373149	0.733319		0.318899
Cdkl5	MGI:1278336	CDKL5	HGNC:11411	ENSMUSG00000031292	ENSG00000008086	2252	1738	-0.50377	-0.839691	-0.771802	-2.63319	-1.89628	-2.35788	-2.29578	-0.705088	3.01195	+	0.00261343
Cfl1	MGI:101757	CFL1	HGNC:1874	ENSMUSG00000056201	ENSG00000172757	420	2335	1.84179	1.49367	1.05949	4.25463	4.25833	4.58461	4.36586	1.46498	0.133891	+	0.000321823
Chchd3	MGI:1913325	CHCHD3	HGNC:21906	ENSMUSG00000053768	ENSG00000106554	520	2242	1.60223	0.805833	0.20402	1.54744	1.13232	0.612133	1.09729	0.870693	0.854646		0.665922
Chmp1a	MGI:1920159	CHMP1A	HGNC:8740	ENSMUSG00000000743	ENSG00000131165	1846	442	-1.95841	-1.6985	-1.82666	-2.17019	-2.92759	-1.41293	-2.17024	-1.82785	1.26785		0.483318
Chmp4b	MGI:1922858	CHMP4B	HGNC:16171	ENSMUSG00000038467	ENSG00000101421	831	996	0.403898	0.235898	-0.357598	0.637575	0.926569	0.633343	0.732496	0.0940659	0.642412		0.0634247
Chmp6	MGI:3583942	CHMP6	HGNC:25675	ENSMUSG00000025371	ENSG00000176108	1716	101	-0.794423	-2.24459	-1.51756	-1.15578	-1.62572	-1.60609	-1.46253	-1.51886	0.96171		0.905567
Cisd1	MGI:1261855	CISD1	HGNC:30880	ENSMUSG00000037710	ENSG00000122873	648	629	0.26091	-0.89427	-0.715841	2.13481	1.97872	1.13203	1.74852	-0.449734	0.217902		0.00984742
Cit	MGI:105313	CIT	HGNC:1985	ENSMUSG00000029516	ENSG00000122966	2174	1307	1.81531	2.34785	2.45107	-0.22385	0.612622	0.509636	0.299469	2.20474	3.7458	+	0.0044127
Ckap4	MGI:2444926	CKAP4	HGNC:16991	ENSMUSG00000046841	ENSG00000136026	1141	1066	-0.24257	-0.454351	-0.28694	-0.314378	0.150358	0.340693	0.0588909	-0.327954	0.764801		0.132148
Ckap5	MGI:1923036	CKAP5	HGNC:28959	ENSMUSG00000040549	ENSG00000175216	905	1443	0.636934	2.02426	1.06818	2.57216	1.45461	0.421269	1.48268	1.24313	0.847006		0.763637
Ckb	MGI:88407	CKB	HGNC:1991	ENSMUSG00000001270	ENSG00000166165	732	889	2.35517	3.09558	3.52624	6.24539	6.17648	6.96492	6.46226	2.99233	0.0902498	+	0.00122369
Clasp1	MGI:1923957	CLASP1	HGNC:17088	ENSMUSG00000064302	ENSG00000074054	1905	2212	-1.7567	-1.63308	-1.47948	-1.66143	-2.7517	-2.3136	-2.24224	-1.62309	1.53598		0.131002
Clasp2	MGI:1923749	CLASP2	HGNC:17078	ENSMUSG00000033392	ENSG00000163539	1210	1822	0.832244	0.762256	0.819661	0.729374	-0.192773	0.337323	0.291308	0.80472	1.42742		0.127964
Clip2	MGI:1313136	CLIP2	HGNC:2586	ENSMUSG00000063146	ENSG00000106665	623	2027	0.639826	0.698289	0.44785	-0.6775	-1.6462	-0.216581	-0.846761	0.595322	2.71713		0.0280648
Clta	MGI:894297	CLTA	HGNC:2090	ENSMUSG00000028478	ENSG00000122705	500	2158	1.78949	1.04029	0.500223	-0.38148	1.00554	-0.0255426	0.199506	1.11	1.87969		0.178815
Cltb	MGI:1921575	CLTB	HGNC:2091	ENSMUSG00000047547	ENSG00000175416	501	1193	1.61021	1.06108	0.934115	-0.414775	1.15723	-1.41754	-0.22503	1.2018	2.68856		0.140383
Cltc	MGI:2388633	CLTC	HGNC:2092	ENSMUSG00000047126	ENSG00000141367	767	982	4.54012	3.59152	4.00495	3.97048	5.2058	4.68292	4.61974	4.04553	0.671657		0.27208
Cnksr2	MGI:2661175	CNKSR2	HGNC:19701	ENSMUSG00000025658	ENSG00000149970	2019	1192	0.599555	-0.11342	0.236072	-0.875056	-1.78769	-1.3494	-1.33738	0.240736	2.9858		0.00917488
Cnp	MGI:88437	CNP	HGNC:2158	ENSMUSG00000006782	ENSG00000173786	1732	1468	3.5599	3.47192	4.18546	6.4954	4.6841	5.91496	5.69815	3.73909	0.257196		0.0277424
Cntn1	MGI:105980	CNTN1	HGNC:2171	ENSMUSG00000055022	ENSG00000018236	950	467	6.07022	5.35268	5.75247	5.19081	4.62934	5.74543	5.18853	5.72512	1.45055		0.234092
Cntn2	MGI:104518	CNTN2	HGNC:2172	ENSMUSG00000053024	ENSG00000184144	796	373	1.11078	0.355482	1.48584	0.552528	-2.11601	-0.869379	-0.810952	0.984033	3.47012		0.0992941
Cntnap1	MGI:1858201	CNTNAP1	HGNC:8011	ENSMUSG00000017167	ENSG00000108797	1421	1642	1.71342	2.00885	1.99375	2.92575	2.45648	3.46895	2.95039	1.90534	0.484628		0.0274263
Cntnap2	MGI:1914047	CNTNAP2	HGNC:13830	ENSMUSG00000039419	ENSG00000174469	933	1867	-1.40201	-2.01516	-3.48866	-2.46354	-3.01627	-4.57244	-3.35075	-2.30194	2.06882		0.301247
Coro1a	MGI:1345961	CORO1A	HGNC:2252	ENSMUSG00000030707	ENSG00000102879	355	1528	-1.08102	-0.0243057	0.21873	1.63845	1.60136	2.60251	1.94744	-0.295532	0.211251		0.0122113
Coro1c	MGI:1345964	CORO1C	HGNC:2254	ENSMUSG00000004530	ENSG00000110880	2360	533	1.98682	2.71909	3.10732	2.16735	3.45319	1.89159	2.50404	2.60441	1.07204		0.871602
Coro2b	MGI:2444283	CORO2B	HGNC:2256	ENSMUSG00000041729	ENSG00000103647	2447	1030	2.65541	3.02382	2.35339	2.5805	2.16123	2.94873	2.56349	2.67754	1.08227		0.722158
Cox5a	MGI:88474	COX5A	HGNC:2267	ENSMUSG00000000088	ENSG00000178741	802	395	-2.36787	-3.66304	-3.67691	-3.48933	-3.26662	-3.74999	-3.50198	-3.23594	1.2025		0.590903
Cox5b	MGI:88475	COX5B	HGNC:2269	ENSMUSG00000061518	ENSG00000135940	682	243	-4.20561	-4.8368	-4.59093	-1.98167	-1.54179	-2.46356	-1.99567	-4.54444	0.170901	+	0.00140154
Cox7a2l	MGI:106015	COX7A2L	HGNC:2289	ENSMUSG00000024248	ENSG00000115944	715	237	-2.53154	-3.66617	-3.53301	-1.81738	-2.69383	-2.14692	-2.21938	-3.24357	0.491683		0.0804263
Crmp1	MGI:107793	CRMP1	HGNC:2365	ENSMUSG00000029121	ENSG00000072832	2162	1396	-3.79104	-2.93755	-3.60543	-0.805575	-0.889957	-0.155571	-0.617034	-3.44467	0.140863	+	0.00124565
Crtac1	MGI:1920082	CRTAC1	HGNC:14882	ENSMUSG00000042401	ENSG00000095713	2044	1570	-0.524717	-0.518397	-0.278433	0.0609484	-0.33582	0.55836	0.0944963	-0.440516	0.690153		0.119667
Cs	MGI:88529	CS	HGNC:2422	ENSMUSG00000005683	ENSG00000062485	819	152	2.14163	0.831963	2.0773	1.9153	1.49431	1.1836	1.53107	1.68363	1.11154		0.764658
Csnk1d	MGI:1355272	CSNK1D	HGNC:2452	ENSMUSG00000025162	ENSG00000141551	390	2277	-0.414146	-0.492024	0.137391	0.347586	-0.940425	0.17723	-0.138536	-0.25626	0.921641		0.806505
Csnk1e	MGI:1351660	CSNK1E	HGNC:2453	ENSMUSG00000022433	ENSG00000213923	887	1495	-0.405276	-0.226119	-0.493237	-0.0864561	-1.93407	0.650111	-0.456806	-0.374878	1.05843		0.920657
Csnk2a1	MGI:88543	CSNK2A1	HGNC:2457	ENSMUSG00000074698	ENSG00000101266	550	1828	2.79814	2.46968	2.24676	-1.74629	1.47763	0.688347	0.139896	2.50486	5.15139		0.0739543
Ctbp1	MGI:1201685	CTBP1	HGNC:2494	ENSMUSG00000037373	ENSG00000159692	442	623	-3.65365	-2.50429	-3.62659	-1.83142	-2.05757	-4.0565	-2.6485	-3.26151	0.653831		0.487285
Ctnna1	MGI:88274	CTNNA1	HGNC:2509	ENSMUSG00000037815	ENSG00000044115	1325	148	-0.613298	-1.31405	1.19143	-1.62712	-0.919	-0.567494	-1.03787	-0.245306	1.73215		0.382579
Ctnna2	MGI:88275	CTNNA2	HGNC:2510	ENSMUSG00000063063	ENSG00000066032	2245	1267	5.06063	4.96294	5.60452	2.89579	3.90319	3.50894	3.43597	5.20936	3.41857		0.00748392
Ctnnb1	MGI:88276	CTNNB1	HGNC:2514	ENSMUSG00000006932	ENSG00000168036	565	561	4.78526	4.62022	4.62485	2.86109	3.91556	2.78163	3.18609	4.67678	2.81022		0.0156719
Ctnnd1	MGI:105100	CTNND1	HGNC:2515	ENSMUSG00000034101	ENSG00000198561	1285	1791	1.5641	1.44679	1.39015	-0.40767	-0.511404	0.619183	-0.0999638	1.46701	2.96283		0.0126482
Ctnnd2	MGI:1195966	CTNND2	HGNC:2516	ENSMUSG00000022240	ENSG00000169862	1457	878	2.38924	2.39464	2.3061	1.35572	1.31832	1.87028	1.51477	2.36333	1.80069		0.0092779
Cyfip1	MGI:1338801	CYFIP1	HGNC:13759	ENSMUSG00000030447	ENSG00000068793	2196	1560	-1.23897	-1.17379	-0.507533	-1.509	-1.1657	-0.72918	-1.13463	-0.97343	1.11822		0.64578
Cyfip2	MGI:1924134	CYFIP2	HGNC:13760	ENSMUSG00000020340	ENSG00000055163	2232	1806	2.65863	2.98574	3.43731	2.4349	2.6942	3.04149	2.72353	3.02723	1.2343		0.348255
Cyld	MGI:1921506	CYLD	HGNC:2584	ENSMUSG00000036712	ENSG00000083799	1130	1323	-1.79775	-1.03479	-2.06655	-1.36506	-1.28868	-1.09172	-1.24849	-1.63303	0.766022		0.295199
Cyth3	MGI:1335107	CYTH3	HGNC:9504	ENSMUSG00000018001	ENSG00000008256	473	1306	-2.7932	-3.21679	-3.11781	-1.31536	-2.21677	-0.716922	-1.41635	-3.0426	0.323929		0.0231725
D10Wsu52e	MGI:106379	C22orf28	HGNC:26935	ENSMUSG00000001783	ENSG00000100220	2141	267	-0.240076	-0.582044	-1.15726	-0.545234	-0.638728	-0.719838	-0.6346	-0.659795	0.982688		0.930734
D3Bwg0562e	MGI:106530	NOT_FOUND	NOT_FOUND	ENSMUSG00000044667	ENSG00000117600	1818	1870	1.79666	1.45932	1.30063	-2.53285	-1.84006	-1.69006	-2.02099	1.51887	11.6306	+	0.000287379
D430041D05Rik	MGI:2181743	C11orf41	HGNC:24836	ENSMUSG00000068373	ENSG00000110427	2352	2243	2.40054	2.16238	2.28521	0.201646	0.232553	0.382142	0.272114	2.28271	4.02949	+	2.22477e-05
Daam1	MGI:1914596	DAAM1	HGNC:18142	ENSMUSG00000034574	ENSG00000100592	1819	2121	0.548043	-0.00995024	0.414643	-0.304626	-1.2013	-0.129257	-0.545061	0.317578	1.81836		0.0813397
Daam2	MGI:1923691	DAAM2	HGNC:18143	ENSMUSG00000040260	ENSG00000146122	2123	1635	-0.116786	-2.75811	-0.138519	-1.57226	-3.64754	-2.45218	-2.55733	-1.00447	2.93397		0.217948
Dbn1	MGI:1931838	DBN1	HGNC:2695	ENSMUSG00000034675	ENSG00000113758	2318	858	4.0261	3.92862	4.85872	-0.970198	0.725587	-0.339974	-0.194862	4.27115	22.1006	+	0.00149296
Dclk1	MGI:1330861	DCLK1	HGNC:2700	ENSMUSG00000027797	ENSG00000133083	1370	2031	2.18336	2.26199	2.09689	1.08442	2.22822	1.90393	1.73886	2.18074	1.35838		0.267905
Dclk2	MGI:1918012	DCLK2	HGNC:19002	ENSMUSG00000028078	ENSG00000170390	1623	1124	-1.10484	-1.22708	-0.799254	-1.44119	-0.885501	-2.29405	-1.54025	-1.04372	1.41081		0.311441
Dctn1	MGI:107745	DCTN1	HGNC:2711	ENSMUSG00000031865	ENSG00000204843	2423	2351	-0.558101	-0.659567	-1.1964	0.974194	1.20611	1.23932	1.13987	-0.804691	0.259793	+	0.000826173
Dctn2	MGI:107733	DCTN2	HGNC:2712	ENSMUSG00000025410	ENSG00000175203	1476	242	1.33106	1.38102	1.06198	2.51149	1.75301	2.46231	2.24227	1.25802	0.505488		0.0204065
Dctn3	MGI:1859251	DCTN3	HGNC:2713	ENSMUSG00000028447	ENSG00000137100	464	1597	-1.35966	-3.6819	-3.44489	-1.142	-1.07418	-1.69483	-1.30367	-2.82882	0.347443		0.116436
Dctn4	MGI:1914915	DCTN4	HGNC:15518	ENSMUSG00000024603	ENSG00000132912	2143	1444	-3.28296	-2.59788	-2.35351	-5.0286	-1.44361	-1.65854	-2.71025	-2.74479	0.976346		0.978305
Ddost	MGI:1194508	DDOST	HGNC:2728	ENSMUSG00000028757	ENSG00000117242	1627	293	-1.58095	-2.03472	-0.519997	-3.46219	-1.62341	-2.20841	-2.43134	-1.37856	2.07452		0.209131
Ddx1	MGI:2144727	DDX1	HGNC:2734	ENSMUSG00000037149	ENSG00000079785	1587	592	-1.91613	-1.95795	-1.35064	-0.924277	-1.62528	-2.22153	-1.59036	-1.74157	0.900493		0.738777
Ddx3x	MGI:103064	DDX3X	HGNC:2745	ENSMUSG00000060628	ENSG00000215301	1312	1227	0.819689	0.886812	0.713198	-0.259055	-0.257404	-1.3615	-0.625986	0.806567	2.69924		0.0181611
Ddx6	MGI:104976	DDX6	HGNC:2747	ENSMUSG00000032097	ENSG00000110367	957	83	-5.2751	-6.56623	-2.928	-0.218635	0.132448	0.303121	0.0723114	-4.92311	0.0313494		0.00971301
Dhx30	MGI:1920081	DHX30	HGNC:16716	ENSMUSG00000032480	ENSG00000132153	1954	613	-4.16042	-5.15942	-3.51317	-3.09972	-4.37974	-4.61338	-4.03095	-4.27767	0.842809		0.73184
Dip2b	MGI:2145977	DIP2B	HGNC:29284	ENSMUSG00000023026	ENSG00000066084	2063	1595	-4.25091	-2.97752	-2.97866	-1.5788	-2.47794	-1.55028	-1.86901	-3.40237	0.345472		0.0425631
Dlat	MGI:2385311	DLAT	HGNC:2896	ENSMUSG00000000168	ENSG00000150768	670	946	0.224706	0.532912	0.705333	0.0726931	0.788215	-0.117719	0.24773	0.487651	1.18093		0.481557
Dlg1	MGI:107231	DLG1	HGNC:2900	ENSMUSG00000022770	ENSG00000075711	959	1834	3.01583	2.8708	2.83946	0.432933	0.35531	0.734195	0.507479	2.9087	5.2825	+	4.70796e-05
Dlg2	MGI:1344351	DLG2	HGNC:2901	ENSMUSG00000052572	ENSG00000150672	2036	1137	5.03284	5.19476	5.48961	1.95184	3.16291	2.68021	2.59832	5.23907	6.23656	+	0.00217655
Dlg3	MGI:1888986	DLG3	HGNC:2902	ENSMUSG00000000881	ENSG00000082458	744	2135	4.41152	4.38455	4.55046	0.78896	2.04476	1.81427	1.54933	4.44884	7.46176	+	0.00173706
Dlg4	MGI:1277959	DLG4	HGNC:2903	ENSMUSG00000020886	ENSG00000132535	2175	2127	6.73605	6.8886	6.76516	4.00055	5.41939	4.12604	4.51533	6.7966	4.86108		0.00746897
Dlgap1	MGI:1346065	DLGAP1	HGNC:2905	ENSMUSG00000003279	ENSG00000170579	691	2169	2.60601	3.02028	3.26956	1.18897	1.62562	0.68764	1.16741	2.96528	3.47708	+	0.00569518
Dlgap2	MGI:2443181	DLGAP2	HGNC:2906	ENSMUSG00000047495	ENSG00000198010	1025	1045	1.77302	1.99731	1.97618	-1.38873	-0.681728	-1.36584	-1.14543	1.9155	8.34513	+	0.000227587
Dlgap3	MGI:3039563	DLGAP3	HGNC:30368	ENSMUSG00000042388	ENSG00000116544	1429	847	3.0114	3.33454	3.16416	-0.426362	0.552934	0.203852	0.110141	3.17004	8.33911	+	0.000529845
Dlgap4	MGI:2138865	DLGAP4	HGNC:24476	ENSMUSG00000061689	ENSG00000080845	253	2249	1.42475	1.29902	1.40224	-1.97088	-2.19027	-3.87778	-2.67964	1.37534	16.6215	+	0.00255709
Dlst	MGI:1926170	DLST	HGNC:2911	ENSMUSG00000004789	ENSG00000119689	2003	843	2.09355	1.425	0.993103	2.98894	1.69621	0.999367	1.89484	1.50388	0.762625		0.588178
Dmwd	MGI:94907	DMWD	HGNC:2936	ENSMUSG00000030410	ENSG00000185800	2321	2358	-2.4781	-2.52019	-3.6867	-2.43661	-3.30501	-2.4627	-2.73477	-2.89499	0.894887		0.75916
Dnaja1	MGI:1270129	DNAJA1	HGNC:5229	ENSMUSG00000028410	ENSG00000086061	433	761	-0.290716	-0.92403	-0.6895	0.537938	-0.0887765	1.2516	0.566919	-0.634749	0.434772		0.0487795
Dnaja2	MGI:1931882	DNAJA2	HGNC:14884	ENSMUSG00000031701	ENSG00000069345	1011	881	-2.46015	-1.56828	-1.47151	0.632614	-0.60305	0.336488	0.122018	-1.83331	0.257862		0.0159946
Dnajb1	MGI:1931874	DNAJB1	HGNC:5270	ENSMUSG00000005483	ENSG00000132002	525	882	-3.2449	-1.39796	-1.77217	1.08384	-3.31302	1.52368	-0.235168	-2.13834	0.267354		0.311382
Dnajb6	MGI:1344381	DNAJB6	HGNC:14888	ENSMUSG00000029131	ENSG00000105993	777	370	-0.962513	-0.264643	-0.474781	0.749815	0.132579	0.710667	0.53102	-0.567312	0.467056		0.0187313
Dnajc11	MGI:2443386	DNAJC11	HGNC:25570	ENSMUSG00000039768	ENSG00000007923	1795	1127	-0.0304229	-0.00449152	-0.0362049	-0.875512	-1.49239	-0.333047	-0.900318	-0.0237064	1.83606		0.0590226
Dnajc13	MGI:2676368	DNAJC13	HGNC:30343	ENSMUSG00000032560	ENSG00000138246	1735	2209	-2.4091	-1.44729	-1.35216	-2.1635	-1.94714	-3.49909	-2.53657	-1.73618	1.74157		0.247199
Dnajc19	MGI:1914963	DNAJC19	HGNC:30528	ENSMUSG00000027679	ENSG00000205981	1702	2144	-1.56127	-3.78655	-3.01003	1.3447	-2.4203	-0.666958	-0.580854	-2.78595	0.21687		0.157066
Dnm1	MGI:107384	DNM1	HGNC:2972	ENSMUSG00000026825	ENSG00000106976	2384	1993	4.99004	4.8823	5.51536	4.79476	5.96903	5.78508	5.51629	5.12923	0.76469		0.402531
Dnm1l	MGI:1921256	DNM1L	HGNC:2973	ENSMUSG00000022789	ENSG00000087470	1144	2104	0.177822	0.349464	-0.6815	1.90649	2.28625	1.71789	1.97021	-0.0514045	0.246282	+	0.00494516
Dnm2	MGI:109547	DNM2	HGNC:2974	ENSMUSG00000033335	ENSG00000079805	1279	2233	-3.1592	-1.68867	-0.440855	-0.431436	-0.484908	0.422749	-0.164531	-1.76291	0.330248		0.129415
Dnm3	MGI:1341299	DNM3	HGNC:29125	ENSMUSG00000040265	ENSG00000197959	2117	1161	-0.238482	-0.404168	0.870084	0.738141	0.898841	1.24424	0.960408	0.0758115	0.541639		0.107008
Dock1	MGI:2429765	DOCK1	HGNC:2987	ENSMUSG00000058325	ENSG00000150760	512	2263	-4.99403	-4.93525	-6.05121	-2.28878	-3.64112	-3.27767	-3.06919	-5.32683	0.209114		0.0141622
Dock10	MGI:2146320	DOCK10	HGNC:23479	ENSMUSG00000038608	ENSG00000135905	1801	1626	-3.4119	-3.26042	-4.05957	-3.54558	-2.5919	-2.82172	-2.9864	-3.5773	0.66393		0.192726
Dock3	MGI:2429763	DOCK3	HGNC:2989	ENSMUSG00000039716	ENSG00000088538	1387	1341	-1.5494	-1.51013	-2.56656	-3.28714	-3.20655	-2.87199	-3.12189	-1.87536	2.3727		0.0276933
Dock4	MGI:1918006	DOCK4	HGNC:19192	ENSMUSG00000035954	ENSG00000128512	210	1069	-0.778976	-0.66999	-1.23704	-2.70538	-1.87645	-2.27432	-2.28538	-0.895334	2.62088		0.00930843
Dock9	MGI:106321	DOCK9	HGNC:14132	ENSMUSG00000025558	ENSG00000088387	1352	2395	-1.39736	-1.15787	-1.74977	-1.84534	-1.35895	-2.20917	-1.80449	-1.435	1.29189		0.286016
Dpp6	MGI:94921	DPP6	HGNC:3010	ENSMUSG00000061576	ENSG00000130226	1520	2378	-1.42304	-1.61974	-0.972672	-4.49395	-4.19967	-4.37094	-4.35485	-1.33848	8.0913	+	0.000135661
Dpysl2	MGI:1349763	DPYSL2	HGNC:3014	ENSMUSG00000022048	ENSG00000092964	1523	187	2.0374	2.3977	2.45422	5.38965	5.04664	5.55214	5.32948	2.29644	0.12217	+	0.000106136
Dpysl3	MGI:1349762	DPYSL3	HGNC:3015	ENSMUSG00000024501	ENSG00000113657	2369	443	-4.08305	-3.28343	-4.5679	0.936688	0.550967	1.46419	0.983948	-3.97812	0.0320825	+	0.000413841
Dtna	MGI:106039	DTNA	HGNC:3057	ENSMUSG00000024302	ENSG00000134769	57	1056	-3.19021	-2.84735	-2.35617	-1.81648	-1.30145	-2.74784	-1.95526	-2.79791	0.557616		0.159007
Dync1h1	MGI:103147	DYNC1H1	HGNC:2961	ENSMUSG00000018707	ENSG00000197102	2058	368	-4.42721	-4.9691	-2.91875	-2.86246	-3.88723	-5.0596	-3.93643	-4.10502	0.88971		0.857831
Dync1i1	MGI:107743	DYNC1I1	HGNC:2963	ENSMUSG00000029757	ENSG00000158560	716	720	-1.011	-0.871111	-0.685758	0.00434255	0.724191	-0.150363	0.192723	-0.855957	0.48341		0.0213201
Dync1i2	MGI:107750	DYNC1I2	HGNC:2964	ENSMUSG00000027012	ENSG00000077380	1350	721	-1.36383	-1.12942	-0.665275	-0.024942	0.160844	-0.0593509	0.0255171	-1.05284	0.473568		0.0075742
Dync1li1	MGI:2135610	DYNC1LI1	HGNC:18745	ENSMUSG00000032435	ENSG00000144635	269	944	-0.106223	-0.0170016	-0.44274	-2.29247	-0.889022	-0.106182	-1.09589	-0.188655	1.87545		0.236803
Dync1li2	MGI:107738	DYNC1LI2	HGNC:2966	ENSMUSG00000035770	ENSG00000135720	407	1878	-1.6719	-1.03692	-1.62551	0.693096	0.0201898	0.752169	0.488485	-1.44478	0.261837	+	0.00341919
Dynll1	MGI:1861457	DYNLL1	HGNC:15476	ENSMUSG00000009013	ENSG00000088986	613	425	0	0.202625	-0.413257	1.02621	-0.0706878	2.45747	1.13766	-0.0702106	0.432906		0.184443
Dynll2	MGI:1915347	DYNLL2	HGNC:24596	ENSMUSG00000020483	ENSG00000121083	1072	780	1.87205	2.00925	1.32452	1.37657	0.329722	2.40458	1.37029	1.73527	1.28786		0.595914
Dynlrb1	MGI:1914318	DYNLRB1	HGNC:15468	ENSMUSG00000047459	ENSG00000125971	1262	1422	-1.99297	-2.75461	-2.7328	0.515803	-1.26198	0.454105	-0.097357	-2.49346	0.189977		0.0194556
Eef1a1	MGI:1096881	EEF1A1	HGNC:3189	ENSMUSG00000037742	ENSG00000156508	1908	1343	3.19436	2.69895	3.21545	4.33093	4.47773	4.38211	4.39693	3.03626	0.389401	+	0.00144853
Eef1a2	MGI:1096317	EEF1A2	HGNC:3192	ENSMUSG00000016349	ENSG00000101210	495	360	0.809889	-0.38839	0.784602	-0.553964	1.66817	-1.23216	-0.0393179	0.402034	1.35788		0.669884
Eef1d	MGI:1913906	EEF1D	HGNC:3211	ENSMUSG00000055762	ENSG00000104529	734	326	-2.94899	-4.26082	-3.17656	-2.19602	-1.8719	-2.53871	-2.20221	-3.46212	0.417569		0.0482556
Eef1g	MGI:1914410	EEF1G	HGNC:3213	ENSMUSG00000071644	ENSG00000186676	2445	1461	1.59951	1.10651	1.82378	0.927048	1.7531	1.2711	1.31708	1.50993	1.14302		0.579003
Eef2	MGI:95288	EEF2	HGNC:3214	ENSMUSG00000034994	ENSG00000167658	1307	2003	-1.29503	-1.88784	-1.25036	-1.33257	-1.41034	-3.66506	-2.13599	-1.47775	1.57816		0.452628
Efhd2	MGI:106504	EFHD2	HGNC:28670	ENSMUSG00000040659	ENSG00000142634	1064	129	-1.0738	-1.66118	-3.62589	-2.82667	1.36866	0.0394166	-0.472862	-2.12029	0.319209		0.321878
Efr3b	MGI:2444851	EFR3B	HGNC:29155	ENSMUSG00000020658	ENSG00000084710	2392	2259	2.11936	1.35534	2.22253	-0.507649	0.345129	-1.3305	-0.497673	1.89908	5.26615		0.012516
Ehd3	MGI:1928900	EHD3	HGNC:3244	ENSMUSG00000024065	ENSG00000013016	676	868	-1.48719	-0.233474	-0.397051	1.65906	1.63712	2.78537	2.02718	-0.705906	0.150404		0.00748123
Eif2s1	MGI:95299	EIF2S1	HGNC:3265	ENSMUSG00000021116	ENSG00000134001	1443	2074	-3.45612	-3.833	-2.363	-1.64786	-2.60772	-1.70966	-1.98841	-3.21737	0.426626		0.084783
Eif4a2	MGI:106906	EIF4A2	HGNC:3284	ENSMUSG00000022884	ENSG00000156976	1753	1778	-1.79168	-1.50815	-1.21666	1.11855	0.85471	0.839274	0.937511	-1.50549	0.1839	+	0.000207172
Elfn2	MGI:3608416	ELFN2	HGNC:29396	ENSMUSG00000043460	ENSG00000166897	1537	2061	0.344851	0.313686	0.0534742	-2.30041	-2.12825	-2.05065	-2.15977	0.237337	5.26745	+	3.49404e-05
Elmo2	MGI:2153045	ELMO2	HGNC:17233	ENSMUSG00000017670	ENSG00000062598	1527	1781	0.918559	1.09183	0.834537	-0.526617	0.746193	-0.645545	-0.14199	0.948309	2.12918		0.0733027
Enah	MGI:108360	ENAH	HGNC:18271	ENSMUSG00000022995	ENSG00000154380	2212	2123	-2.15868	-0.381996	-1.38142	-3.13647	-1.43684	-4.25579	-2.94303	-1.30737	3.10731		0.16616
Eno1	MGI:95393	ENO1	HGNC:3350	ENSMUSG00000063524	ENSG00000074800	2070	1970	0.704649	1.25748	1.30967	4.09861	4.38402	3.79892	4.09385	1.0906	0.124719	+	0.000306184
Eno2	MGI:95394	ENO2	HGNC:3353	ENSMUSG00000004267	ENSG00000111674	1339	1617	-1.49918	-3.18218	-2.38994	2.52076	1.47706	1.81703	1.93828	-2.3571	0.0509285	+	0.00171781
Enpp6	MGI:2445171	ENPP6	HGNC:23409	ENSMUSG00000038173	ENSG00000164303	1171	1346	0.224046	0.366749	0.0554291	3.34196	3.04839	2.9372	3.10918	0.215408	0.134551	+	4.31976e-05
Epb4.1	MGI:95401	EPB41	HGNC:3377	ENSMUSG00000028906	ENSG00000159023	1402	1761	-3.71428	-2.85393	-5.08691	2.1691	0.977108	-1.00253	0.714558	-3.88504	0.0412461		0.0152456
Epb4.1l1	MGI:103010	EPB41L1	HGNC:3378	ENSMUSG00000027624	ENSG00000088367	766	1999	1.51173	1.42865	1.30525	0.841243	1.85491	2.09965	1.5986	1.41521	0.880633		0.662573
Epb4.1l2	MGI:103009	EPB41L2	HGNC:3379	ENSMUSG00000019978	ENSG00000079819	530	1365	-1.8455	-1.74499	-1.98771	-0.871945	-2.54823	-4.0731	-2.49776	-1.8594	1.55656		0.528967
Epb4.1l3	MGI:103008	EPB41L3	HGNC:3380	ENSMUSG00000024044	ENSG00000082397	1004	1987	2.542	2.0362	2.33765	3.0059	3.42111	3.51212	3.31304	2.30529	0.497319		0.00926663
Epb4.9	MGI:99670	EPB49	HGNC:3382	ENSMUSG00000022099	ENSG00000158856	1572	550	1.87208	2.10385	2.04004	2.41818	2.36357	2.7054	2.49572	2.00533	0.711833		0.0179219
Epha4	MGI:98277	EPHA4	HGNC:3388	ENSMUSG00000026235	ENSG00000116106	298	654	-0.238664	0.146816	-0.156258	-0.0138592	-1.0094	0.25319	-0.256691	-0.0827019	1.12817		0.687216
Eprs	MGI:97838	EPRS	HGNC:3418	ENSMUSG00000026615	ENSG00000136628	458	1647	-3.8196	-4.48068	-4.3938	-2.88012	-3.25336	-4.09485	-3.40945	-4.23136	0.565691		0.11861
Eps15l1	MGI:104582	EPS15L1	HGNC:24634	ENSMUSG00000006276	ENSG00000127527	1184	1858	0.231735	-0.541927	0.971581	-1.11492	-0.905269	-0.993096	-1.00443	0.220463	2.33738		0.0499946
Erc1	MGI:2151013	ERC1	HGNC:17072	ENSMUSG00000030172	ENSG00000082805	1230	294	1.14451	0.788663	0.6745	-1.69536	-1.84347	-1.91021	-1.81635	0.869226	6.43336	+	6.53258e-05
Erc2	MGI:1098749	ERC2	HGNC:31922	ENSMUSG00000040640	ENSG00000187672	2095	1955	4.47965	4.5033	3.81191	1.69263	2.33862	2.61503	2.21543	4.26495	4.1397	+	0.00447096
Erlin2	MGI:2387215	ERLIN2	HGNC:1356	ENSMUSG00000031483	ENSG00000147475	860	1020	0.18089	0.551561	-0.16977	0.822067	0.55018	0.472773	0.615006	0.18756	0.743577		0.141312
Evl	MGI:1194884	EVL	HGNC:20234	ENSMUSG00000021262	ENSG00000196405	1225	63	-4.52174	-2.83825	-2.69061	-3.46677	-2.06534	-0.769109	-2.1004	-3.3502	0.420507		0.269382
Exoc1	MGI:2445020	EXOC1	HGNC:30380	ENSMUSG00000036435	ENSG00000090989	617	948	-0.0258315	0.0976883	0.564326	-0.766015	-0.478183	-0.192561	-0.47892	0.212061	1.61438		0.0474396
Exoc2	MGI:1913732	EXOC2	HGNC:24968	ENSMUSG00000021357	ENSG00000112685	2279	2186	0.248185	-0.0768734	0.211637	-1.11924	-0.957629	-0.851377	-0.976081	0.12765	2.1491	+	0.00102354
Exoc3	MGI:2443972	EXOC3	HGNC:30378	ENSMUSG00000034152	ENSG00000180104	1172	1918	0.0173914	0.100124	-0.376904	-1.70519	0.0557236	-3.00695	-1.55214	-0.0864629	2.76193		0.178571
Exoc4	MGI:1096376	EXOC4	HGNC:30389	ENSMUSG00000029763	ENSG00000131558	1058	678	0.719727	0.621747	-0.130842	-1.11618	-0.667389	-0.421946	-0.735172	0.403544	2.20185		0.0277869
Exoc5	MGI:2145645	EXOC5	HGNC:10696	ENSMUSG00000061244	ENSG00000070367	2230	2235	-1.31753	-0.457586	-0.692759	-1.93501	-1.14333	-0.814324	-1.29755	-0.822624	1.38985		0.321411
Exoc6b	MGI:1923164	EXOC6B	HGNC:17085	ENSMUSG00000033769	ENSG00000144036	2350	2197	-0.446179	-0.776842	-0.0403746	-1.2551	-1.34904	-2.62655	-1.74356	-0.421132	2.50087		0.0544464
Exoc7	MGI:1859270	EXOC7	HGNC:23214	ENSMUSG00000020792	ENSG00000182473	1243	1438	0.114586	0.621631	0.575116	-1.36848	1.04458	0.0253055	-0.0995315	0.437111	1.45059		0.496278
Exoc8	MGI:2142527	EXOC8	HGNC:24659	ENSMUSG00000074030	ENSG00000116903	904	1695	-2.38162	-1.43454	-2.6909	-2.02401	-1.19475	-1.01775	-1.41217	-2.16902	0.591788		0.196534
Ezr	MGI:98931	EZR	HGNC:12691	ENSMUSG00000052397	ENSG00000092820	2333	1577	-3.50058	-2.79856	-5.05338	-0.862952	-0.528379	-1.12051	-0.837282	-3.78417	0.129687		0.0128066
Fam18a	MGI:3665441	FAM81A	HGNC:28379	ENSMUSG00000050908	ENSG00000166676	1548	2043	1.49786	1.94565	2.2854	0.103052	0.502831	0.213564	0.273149	1.90964	3.10908	+	0.00313341
Fam49b	MGI:1923520	FAM49B	HGNC:25216	ENSMUSG00000022378	ENSG00000153310	1698	433	-2.64929	-2.33906	-3.17401	0.891051	0.493234	-0.0531647	0.443707	-2.72079	0.11153	+	0.000988815
Farp1	MGI:2446173	FARP1	HGNC:3591	ENSMUSG00000025555	ENSG00000152767	789	1693	-0.47559	-0.853894	-0.40375	-1.13935	-1.43477	-0.551326	-1.04182	-0.577745	1.37943		0.190569
Farsa	MGI:1913840	FARSA	HGNC:3592	ENSMUSG00000003808	ENSG00000179115	994	1281	-0.622617	-0.422441	0.261323	0.894709	0.893417	1.23522	1.00778	-0.261245	0.41494		0.0120193
Farsb	MGI:1346035	FARSB	HGNC:17800	ENSMUSG00000026245	ENSG00000116120	1673	1515	-2.46298	-1.23291	-1.52965	-0.613364	-0.166593	-0.804562	-0.528173	-1.74185	0.431169		0.0433604
Fbxo41	MGI:1261912	FBXO41	HGNC:29409	ENSMUSG00000047013	ENSG00000163013	1567	1851	3.78358	3.59469	3.39912	0.134786	1.20886	1.13821	0.827285	3.59246	6.79831	+	0.00161391
Fkbp1b	MGI:1336205	FKBP1B	HGNC:3712	ENSMUSG00000020635	ENSG00000119782	1901	1132	-0.168276	-0.74745	-0.374957	-0.110715	-0.938075	0.1649	-0.29463	-0.430228	0.910293		0.734083
Fkbp8	MGI:1341070	FKBP8	HGNC:3724	ENSMUSG00000019428	ENSG00000105701	1744	716	-0.0296348	0.493099	0.130916	0.870219	0.825146	0.41963	0.704998	0.198127	0.703747		0.0739753
Flot1	MGI:1100500	FLOT1	HGNC:3757	ENSMUSG00000059714	ENSG00000137312	878	276	2.94347	2.39905	2.74671	3.65518	4.02935	3.73143	3.80532	2.69641	0.463644	+	0.00479822
Flot2	MGI:103309	FLOT2	HGNC:3758	ENSMUSG00000061981	ENSG00000132589	2300	2258	3.8944	3.65914	3.80046	4.47676	4.81879	4.426	4.57385	3.78467	0.578671	+	0.00500516
Fmn2	MGI:1859252	FMN2	HGNC:14074	ENSMUSG00000028354	ENSG00000155816	2241	480	-1.06027	-1.26111	-1.37708	-0.942789	-0.799188	-0.741403	-0.827793	-1.23282	0.755223		0.0213034
Fmnl2	MGI:1918659	FMNL2	HGNC:18267	ENSMUSG00000036053	ENSG00000157827	1048	1664	0.834843	0.25171	0.360501	2.83666	0.911469	1.71147	1.81986	0.482351	0.395702		0.0846987
Fscn1	MGI:1352745	FSCN1	HGNC:11148	ENSMUSG00000029581	ENSG00000075618	1180	1682	-2.23888	-2.102	-1.85282	0.620676	2.77201	2.38315	1.92528	-2.06457	0.0629416	+	0.00402318
Fxr2	MGI:1346074	FXR2	HGNC:4024	ENSMUSG00000018765	ENSG00000129245	537	2179	-0.483447	-0.0877688	-0.0468847	-1.76165	-2.29422	-2.17591	-2.07726	-0.206033	3.65844	+	0.000928938
Fyn	MGI:95602	FYN	HGNC:4037	ENSMUSG00000019843	ENSG00000010810	1407	2289	0.457348	0.356459	-0.444642	0.252809	0.122018	0.89109	0.421972	0.123055	0.812862		0.465913
Gabbr1	MGI:1860139	GABBR1	HGNC:4070	ENSMUSG00000024462	ENSG00000204681	108	1075	0.858735	0.355621	0.27117	-2.20493	-1.11148	-2.77655	-2.03099	0.495175	5.76037		0.00839059
Gabbr2	MGI:2386030	GABBR2	HGNC:4507	ENSMUSG00000039809	ENSG00000136928	867	1839	2.65124	2.58625	2.76703	0.432105	0.899846	0.874178	0.735376	2.66817	3.81794	+	0.000274373
Gabra1	MGI:95613	GABRA1	HGNC:4075	ENSMUSG00000010803	ENSG00000022355	1605	172	3.2445	2.95646	2.47281	1.73506	1.1701	1.56471	1.48996	2.89126	2.6414		0.00751356
Gap43	MGI:95639	GAP43	HGNC:4140	ENSMUSG00000047261	ENSG00000172020	528	641	3.58101	3.40399	2.05605	2.59277	3.49087	2.82539	2.96968	3.01368	1.03097		0.940247
Gapdh	MGI:95640	GAPDH	HGNC:4141	ENSMUSG00000057666	ENSG00000111640	1408	1310	3.37782	3.39976	3.48009	3.87347	3.80663	4.64349	4.10786	3.41922	0.620439		0.0634606
Gas7	MGI:1202388	GAS7	HGNC:4169	ENSMUSG00000033066	ENSG00000007237	1009	387	-1.64646	-1.41335	-0.443706	-2.09467	0.220599	0.434256	-0.479938	-1.16784	0.620756		0.482487
Gbas	MGI:1278343	GBAS	HGNC:4179	ENSMUSG00000029432	ENSG00000146729	535	233	0.507803	0.576936	0.0744066	2.19529	1.39374	1.13359	1.57421	0.386382	0.438965		0.0289531
Gdap1	MGI:1338002	GDAP1	HGNC:15968	ENSMUSG00000025777	ENSG00000104381	1545	829	1.42781	0.324855	0.422995	3.04898	2.05468	2.80832	2.63733	0.725222	0.265705		0.0144435
Gdap1l1	MGI:2385163	GDAP1L1	HGNC:4213	ENSMUSG00000017943	ENSG00000124194	1731	498	-0.165777	-0.182015	0.222602	-0.851771	0.69963	-1.12456	-0.425566	-0.0417302	1.30481		0.546439
Gdi1	MGI:99846	GDI1	HGNC:4226	ENSMUSG00000015291	ENSG00000203879	357	1518	-2.36987	-0.36342	-2.28992	3.48607	3.79421	4.0544	3.77823	-1.6744	0.0228347	+	0.00128423
Gfap	MGI:95697	GFAP	HGNC:4235	ENSMUSG00000020932	ENSG00000131095	818	272	1.69499	1.63394	1.82279	6.28034	7.51616	6.86283	6.88644	1.71724	0.0277917	+	0.000138583
Gfra2	MGI:1195462	GFRA2	HGNC:4244	ENSMUSG00000022103	ENSG00000168546	414	252	0.0133181	0.28955	0.0907036	-1.56906	-2.69831	-2.78458	-2.35065	0.131191	5.58611	+	0.00343669
Git1	MGI:1927140	GIT1	HGNC:4272	ENSMUSG00000011877	ENSG00000108262	1863	2056	0.383037	0.220783	0.508175	-0.86544	0.971898	-1.26444	-0.385993	0.370665	1.68957		0.336653
Gja1	MGI:95713	GJA1	HGNC:4274	ENSMUSG00000050953	ENSG00000176857	1398	1714	2.54434	2.16891	2.56537	1.79704	-0.232423	0.451454	0.672024	2.42621	3.37336		0.0451861
Glg1	MGI:104967	GLG1	HGNC:4316	ENSMUSG00000003316	ENSG00000090863	1979	445	-2.19999	-2.10231	-2.79508	-2.79453	-2.93297	-2.97002	-2.89917	-2.36579	1.44731		0.0749984
Glipr2	MGI:1917770	GLIPR2	HGNC:18007	ENSMUSG00000028480	ENSG00000122694	245	1853	-0.304441	-0.957433	-2.34673	3.45241	3.10061	3.0916	3.21487	-1.20287	0.0467873	+	0.00197485
Gls	MGI:95752	GLS	HGNC:4331	ENSMUSG00000026103	ENSG00000115419	1533	1990	-3.27136	-1.79081	-2.26379	-0.626349	-0.833029	-0.305982	-0.588453	-2.44199	0.276714		0.0160542
Glud1	MGI:95753	GLUD1	HGNC:4335	ENSMUSG00000021794	ENSG00000182890	557	178	4.08194	4.33893	4.33451	3.91159	5.25836	5.01276	4.72757	4.25179	0.719078		0.323336
Glul	MGI:95739	GLUL	HGNC:4341	ENSMUSG00000026473	ENSG00000135821	354	2150	2.50731	3.04142	2.60705	2.76309	1.86484	1.26382	1.96392	2.71859	1.68725		0.180262
Gm88	MGI:2684934	C6orf154	HGNC:21375	ENSMUSG00000071073	ENSG00000204052	1254	1336	3.23058	3.96683	3.17131	0.751316	1.46609	0.173381	0.796929	3.45624	6.31732	+	0.00420665
Gna11	MGI:95766	GNA11	HGNC:4379	ENSMUSG00000034781	ENSG00000088256	1719	417	-3.07093	1.55576	2.27028	2.72857	-2.51884	-4.38992	-1.3934	0.251704	3.1277		0.576536
Gna13	MGI:95768	GNA13	HGNC:4381	ENSMUSG00000020611	ENSG00000120063	1551	313	-1.06508	-1.8206	-1.42364	-0.388132	-0.17645	-0.0263159	-0.196966	-1.43644	0.423527		0.00688999
Gnai1	MGI:95771	GNAI1	HGNC:4384	ENSMUSG00000057614	ENSG00000127955	1815	2017	3.90268	1.82022	3.23224	3.05213	-2.96775	2.64994	0.911439	2.98505	4.20938		0.366399
Gnai2	MGI:95772	GNAI2	HGNC:4385	ENSMUSG00000032562	ENSG00000114353	2262	2178	3.6288	2.6949	3.21217	4.08954	-1.76561	3.75697	2.02697	3.17863	2.22169		0.580539
Gnao1	MGI:95775	GNAO1	HGNC:4389	ENSMUSG00000031748	ENSG00000087258	1468	1242	7.90756	7.03969	7.4387	7.4019	5.60759	7.67036	6.89328	7.46198	1.48318		0.458774
Gnas	MGI:95777	GNAS	HGNC:4392	ENSMUSG00000027523	ENSG00000087460	2119	366	3.04772	2.15068	2.40381	2.56616	2.14182	2.51619	2.40806	2.53407	1.09127		0.694813
Gnaz	MGI:95780	GNAZ	HGNC:4395	ENSMUSG00000040009	ENSG00000128266	1742	1243	4.2995	2.75269	3.9151	3.24734	0.582798	3.13346	2.3212	3.65576	2.52199		0.247443
Gnb1	MGI:95781	GNB1	HGNC:4396	ENSMUSG00000029064	ENSG00000078369	844	394	6.13546	6.80321	7.2542	6.67191	6.62475	6.42723	6.57463	6.73096	1.11444		0.663658
Gnb2	MGI:95784	GNB2	HGNC:4398	ENSMUSG00000029711	ENSG00000130427	124	962	6.25076	6.61203	6.79045	5.51695	5.29335	5.53686	5.44905	6.55108	2.14656	+	0.00338188
Gnb4	MGI:104581	GNB4	HGNC:20731	ENSMUSG00000027669	ENSG00000114450	429	1372	-0.960609	0.910864	0.561806	0.821504	1.17943	0.500389	0.833773	0.170687	0.631526		0.336111
Gng2	MGI:102705	GNG2	HGNC:4404	ENSMUSG00000043004	ENSG00000186469	2086	1244	0.450304	-1.37614	-1.07517	-1.19602	-0.37751	0.150792	-0.474245	-0.667003	0.874931		0.793195
Gng3	MGI:102704	GNG3	HGNC:4405	ENSMUSG00000071658	ENSG00000162188	757	655	3.39235	2.69305	2.79816	2.45845	1.93376	3.11712	2.50311	2.96119	1.37371		0.321977
Golga7b	MGI:1918396	GOLGA7B	HGNC:31668	ENSMUSG00000042532	ENSG00000155265	1927	1652	1.78569	1.37731	0.632628	0.777721	0.311944	-0.168128	0.307179	1.26521	1.94266		0.0919712
Gpd2	MGI:99778	GPD2	HGNC:4456	ENSMUSG00000026827	ENSG00000115159	583	1589	-0.709631	-0.889165	-1.25461	-1.09179	-1.80966	-2.29924	-1.73356	-0.951135	1.72002		0.112295
Gphn	MGI:109602	GPHN	HGNC:15465	ENSMUSG00000047454	ENSG00000171723	532	2310	2.54085	2.39488	2.51028	0.0544217	0.918733	0.531929	0.501695	2.482	3.94577	+	0.00145751
Gpr158	MGI:2441697	GPR158	HGNC:23689	ENSMUSG00000045967	ENSG00000151025	1960	2001	0.440288	0.180061	0.454368	-1.68068	-3.00396	-1.22978	-1.97147	0.358239	5.02705		0.0124892
Gprc5b	MGI:1927596	GPRC5B	HGNC:13308	ENSMUSG00000008734	ENSG00000167191	292	538	0.916516	0	0.193308	3.41193	1.42485	2.55885	2.46521	0.369941	0.234025		0.0306122
Gprin1	MGI:1349455	GPRIN1	HGNC:24835	ENSMUSG00000069227	ENSG00000169258	1788	921	0.731087	-0.0476977	0.161491	-0.70492	-1.25859	-0.679338	-0.880951	0.281627	2.23857		0.0178669
Gria1	MGI:95808	GRIA1	HGNC:4571	ENSMUSG00000020524	ENSG00000155511	1414	1823	1.77971	1.69338	2.7614	-1.17707	0.315077	-1.15318	-0.671722	2.07816	6.72664		0.0101992
Gria2	MGI:95809	GRIA2	HGNC:4572	ENSMUSG00000033981	ENSG00000120251	1419	2113	4.73392	4.93348	5.39065	2.23455	3.30081	2.73466	2.75667	5.01935	4.79881	+	0.00341614
Gria3	MGI:95810	GRIA3	HGNC:4573	ENSMUSG00000001986	ENSG00000125675	1424	741	3.7025	3.93937	4.33395	1.35418	2.39316	1.92387	1.8904	3.99194	4.29166	+	0.00396852
Gria4	MGI:95811	GRIA4	HGNC:4574	ENSMUSG00000025892	ENSG00000152578	2229	740	0.371945	0.537351	1.15229	-4.95648	-3.31962	-3.38626	-3.88745	0.687194	23.829	+	0.00144518
Grin1	MGI:95819	GRIN1	HGNC:4584	ENSMUSG00000026959	ENSG00000176884	2090	2247	3.41243	3.69531	3.01768	-0.0849617	0.503442	0.8915	0.43666	3.37514	7.66604	+	0.00104509
Grin2a	MGI:95820	GRIN2A	HGNC:4585	ENSMUSG00000059003	ENSG00000183454	951	309	1.02746	0.953096	1.12105	-1.3098	-1.00876	-1.56281	-1.29379	1.03387	5.01991	+	0.000154932
Grin2b	MGI:95821	GRIN2B	HGNC:4586	ENSMUSG00000030209	ENSG00000150086	1639	1491	2.99064	2.99213	3.00664	-1.20105	0.707422	0.758069	0.0881456	2.99647	7.50746		0.0107357
Gsk3b	MGI:1861437	GSK3B	HGNC:4617	ENSMUSG00000079585	ENSG00000082701	919	549	-1.17134	0.161523	0.15066	0.750307	-0.134312	-1.19102	-0.191674	-0.286387	0.936459		0.90096
Hadha	MGI:2135593	HADHA	HGNC:4801	ENSMUSG00000025745	ENSG00000084754	985	1070	-1.31794	-0.407008	-0.503418	1.26625	0.931189	0.630838	0.942759	-0.74279	0.310884		0.00790391
Hadhb	MGI:2136381	HADHB	HGNC:4803	ENSMUSG00000059447	ENSG00000138029	725	221	-0.906312	-1.48256	-0.581825	2.48762	1.00468	1.14456	1.54562	-0.990231	0.172438		0.00940524
Hapln1	MGI:1337006	HAPLN1	HGNC:2380	ENSMUSG00000021613	ENSG00000145681	756	754	0.855468	1.2478	1.11923	0.423267	-2.36169	0.436191	-0.500745	1.07417	2.97917		0.168316
Hdlbp	MGI:99256	HDLBP	HGNC:4857	ENSMUSG00000034088	ENSG00000115677	702	486	-2.50078	-2.56622	-5.17756	-1.726	-0.848187	-0.60808	-1.06076	-3.41485	0.19559		0.0673601
Hecw2	MGI:2685817	HECW2	HGNC:29853	ENSMUSG00000042807	ENSG00000138411	563	1899	-5.34952	-4.87892	-4.80112	-5.01743	-5.43163	-4.49571	-4.98159	-5.00985	0.980602		0.933956
Hk1	MGI:96103	HK1	HGNC:4922	ENSMUSG00000037012	ENSG00000156515	589	2294	5.90199	5.2717	5.47553	4.82237	5.43227	4.30779	4.85414	5.54974	1.61956		0.13666
Hnrnpk	MGI:99894	HNRNPK	HGNC:5044	ENSMUSG00000021546	ENSG00000165119	1333	1072	-0.917884	-1.0968	-0.782996	-1.02654	-1.40831	-1.30849	-1.24778	-0.932559	1.2442		0.09705
Hnrnpm	MGI:1926465	HNRNPM	HGNC:5046	ENSMUSG00000059208	ENSG00000099783	1241	769	0.0873568	-0.0750842	-0.514525	-1.03696	-0.314144	-1.5483	-0.966468	-0.167417	1.73996		0.116839
Homer1	MGI:1347345	HOMER1	HGNC:17512	ENSMUSG00000007617	ENSG00000152413	131	1759	5.50222	5.35049	5.96427	3.30961	3.60406	4.25568	3.72312	5.60566	3.68724	+	0.00492753
Homer2	MGI:1347354	HOMER2	HGNC:17513	ENSMUSG00000025813	ENSG00000103942	1890	836	1.37512	1.61313	1.62504	1.41552	0.101467	0.892364	0.803118	1.53776	1.66399		0.133102
Hsd17b4	MGI:105089	HSD17B4	HGNC:5213	ENSMUSG00000024507	ENSG00000133835	633	1615	-3.15736	-2.5981	-2.95145	-0.403938	-0.18526	-2.14978	-0.912994	-2.9023	0.25186		0.036389
Hsp90aa1	MGI:96250	HSP90AA1	HGNC:5253	ENSMUSG00000021270	ENSG00000080824	1847	1575	-0.573296	-0.626009	-0.471524	1.74843	2.62033	1.40767	1.92548	-0.556943	0.178944	+	0.00241478
Hsp90ab1	MGI:96247	HSP90AB1	HGNC:5258	ENSMUSG00000023944	ENSG00000205527	1978	1194	1.65015	1.35339	1.81024	-1.18373	-0.102103	-1.29062	-0.858819	1.60459	5.51519	+	0.00361022
Hsp90b1	MGI:98817	HSP90B1	HGNC:12028	ENSMUSG00000020048	ENSG00000203914	866	669	-1.82881	-3.81182	-2.47951	-0.913627	-2.15754	-1.82429	-1.63182	-2.70671	0.474706		0.195286
Hspa12a	MGI:1920692	HSPA12A	HGNC:19022	ENSMUSG00000025092	ENSG00000165868	417	1327	0.409721	0.673746	0.804048	1.04134	1.98813	1.84396	1.62448	0.629172	0.50163		0.0347035
Hspa1a	MGI:96244	HSPA1A	HGNC:5232	ENSMUSG00000067283	ENSG00000204389	1712	1666	-1.91134	-2.75847	-1.29669	2.44718	2.93366	2.2091	2.52998	-1.98883	0.0436217	+	0.000678096
Hspa1b	MGI:99517	HSPA1B	HGNC:5233	ENSMUSG00000067284	ENSG00000204388	1712	1666	-1.91134	-2.75847	-1.29669	2.44718	2.93366	2.2091	2.52998	-1.98883	0.0436217	+	0.000678096
Hspa2	MGI:96243	HSPA2	HGNC:5235	ENSMUSG00000059970	ENSG00000126803	274	1753	-1.77997	-1.16219	-0.719514	1.92275	0.900233	1.1285	1.31716	-1.22056	0.172215	+	0.0043593
Hspa4	MGI:1342292	HSPA4	HGNC:5237	ENSMUSG00000020361	ENSG00000170606	113	1609	-2.16524	-2.59292	-1.40725	-0.718691	0.317856	0.278424	-0.0408037	-2.05514	0.247529		0.0142195
Hspa4l	MGI:107422	HSPA4L	HGNC:17041	ENSMUSG00000025757	ENSG00000164070	1610	1448	-3.82557	-4.00385	-3.2843	-2.32371	-2.21362	-1.48268	-2.00667	-3.70457	0.308234		0.00762217
Hspa5	MGI:95835	HSPA5	HGNC:5238	ENSMUSG00000026864	ENSG00000044574	125	1476	2.58837	2.55031	2.37083	1.86445	2.04853	0.966792	1.62659	2.50317	1.83602		0.0618482
Hspa8	MGI:105384	HSPA8	HGNC:5241	ENSMUSG00000015656	ENSG00000109971	140	1521	5.87535	5.92865	6.06169	5.51704	6.22821	6.01348	5.91958	5.95523	1.02502		0.877889
Hspa9	MGI:96245	HSPA9	HGNC:5244	ENSMUSG00000024359	ENSG00000113013	280	822	0.853903	1.00004	0.485153	1.94691	2.2268	1.61654	1.93009	0.779697	0.450504		0.00790465
Hspd1	MGI:96242	HSPD1	HGNC:5261	ENSMUSG00000025980	ENSG00000144381			0.126538	0.595619	0.677536	1.82279	1.51721	2.33938	1.89313	0.466565	0.372016
Hsph1	MGI:105053	HSPH1	HGNC:16969	ENSMUSG00000029657	ENSG00000120694	2288	1357	0.126538	0.595619	0.677536	1.82279	1.51721	2.33938	1.89313	0.466565	0.372016		0.00842658
Icam5	MGI:109430	ICAM5	HGNC:5348	ENSMUSG00000032174	ENSG00000105376	1543	336	-2.14161	-3.06596	-1.21425	-4.26305	-5.02916	-4.65264	-4.64828	-2.1406	5.68704		0.0123027
Idh3a	MGI:1915084	IDH3A	HGNC:5384	ENSMUSG00000032279	ENSG00000166411	965	1948	-1.33362	-0.0456861	0.0732278	1.27971	0.535033	-0.58587	0.409623	-0.435359	0.556718		0.296784
Igsf21	MGI:2681842	IGSF21	HGNC:28246	ENSMUSG00000040972	ENSG00000117154	1681	1717	1.67583	1.45216	1.37818	1.33764	0.998124	1.08878	1.14151	1.50206	1.28391		0.0561128
Igsf8	MGI:2154090	IGSF8	HGNC:17813	ENSMUSG00000038034	ENSG00000162729	1057	1492	-0.0801483	-0.668485	0.300497	-0.40361	1.53379	-0.512946	0.205744	-0.149378	0.781803		0.648614
Immt	MGI:1923864	IMMT	HGNC:6047	ENSMUSG00000052337	ENSG00000132305	350	1737	3.06868	2.05503	2.10328	2.11887	2.85104	1.08749	2.01913	2.409	1.31027		0.556776
Ina	MGI:96568	INA	HGNC:6057	ENSMUSG00000034336	ENSG00000148798	66	873	4.93479	5.20729	5.08566	4.76985	6.07243	6.81649	5.88626	5.07591	0.570246		0.250341
Inpp5a	MGI:2686961	INPP5A	HGNC:6076	ENSMUSG00000025477	ENSG00000068383	1006	1073	-2.17631	-2.52584	-2.24832	-2.47512	-1.80936	-2.55045	-2.27831	-2.31682	0.973659		0.888762
Iqsec1	MGI:1196356	IQSEC1	HGNC:29112	ENSMUSG00000034312	ENSG00000144711	2324	2279	2.10702	2.27545	2.20292	0.781582	0.488102	1.51419	0.927959	2.19513	2.40689		0.0148407
Iqsec2	MGI:3528396	IQSEC2	HGNC:29059	ENSMUSG00000041115	ENSG00000124313	2370	2273	3.17041	3.4051	3.46872	1.58796	2.0783	2.11044	1.92556	3.34808	2.68052	+	0.00176577
Itsn1	MGI:1338069	ITSN1	HGNC:6183	ENSMUSG00000022957	ENSG00000205726	1710	660	-0.657562	-0.813362	-0.702289	-1.16114	-1.16215	-0.991669	-1.10499	-0.724404	1.30187		0.00651335
Itsn2	MGI:1338049	ITSN2	HGNC:6184	ENSMUSG00000020640	ENSG00000198399	1910	661	-1.81562	-2.41917	-2.62938	-3.93974	-4.00329	-3.9243	-3.95577	-2.28805	3.17712	+	0.00243689
Kalrn	MGI:2685385	KALRN	HGNC:4814	ENSMUSG00000061751	ENSG00000160145	909	2119	1.1266	0.864907	1.45293	-2.49729	-0.951704	-2.26233	-1.90377	1.14814	8.29313	+	0.00392144
Kcnab2	MGI:109239	KCNAB2	HGNC:6229	ENSMUSG00000028931	ENSG00000069424	660	1427	2.50835	2.15594	2.42898	1.07098	-0.82785	0.42067	0.221267	2.36442	4.41727		0.0194691
Kcnq2	MGI:1309503	KCNQ2	HGNC:6296	ENSMUSG00000016346	ENSG00000075043	444	2076	-1.36927	-1.60526	-0.534872	-1.83844	-0.142167	-1.28024	-1.08695	-1.1698	0.944189		0.896058
Kctd12	MGI:2145823	KCTD12	HGNC:14678	ENSMUSG00000048107	ENSG00000178695	1069	1892	2.46315	2.24283	2.55672	1.4917	0.652614	1.65282	1.26571	2.4209	2.22713		0.0234073
Kctd16	MGI:1914659	KCTD16	HGNC:29244	ENSMUSG00000051401	ENSG00000183775	93	2224	3.77091	4.00805	4.43418	2.48088	3.43291	3.5279	3.14723	4.07105	1.89713		0.0751681
Kif17	MGI:1098229	KIF17	HGNC:19167	ENSMUSG00000028758	ENSG00000117245	42	1390	-3.16253	-2.51456	-3.51098	-2.97161	-1.8817	-3.43974	-2.76435	-3.06269	0.813185		0.61391
Kif1a	MGI:108391	KIF1A	HGNC:888	ENSMUSG00000014602	ENSG00000130294	2167	2147	-4.85768	-4.61153	-5.37962	-2.3647	-2.00923	-1.68883	-2.02092	-4.94961	0.131334	+	0.000608585
Kif2a	MGI:108390	KIF2A	HGNC:6318	ENSMUSG00000021693	ENSG00000068796	367	2362	0.710715	0.91627	1.82728	0.975353	0.634708	-0.365623	0.414813	1.15142	1.66625		0.23607
Kif3a	MGI:107689	KIF3A	HGNC:6319	ENSMUSG00000018395	ENSG00000131437	42	1390	-3.16253	-2.51456	-3.51098	-2.97161	-1.8817	-3.43974	-2.76435	-3.06269	0.813185		0.61391
Kif5b	MGI:1098268	KIF5B	HGNC:6324	ENSMUSG00000006740	ENSG00000170759	443	2101	-4.15257	-3.54421	-4.55843	-2.33401	-2.72181	-2.71308	-2.58963	-4.08507	0.354674		0.00962517
Kif5c	MGI:1098269	KIF5C	HGNC:6325	ENSMUSG00000026764	ENSG00000168280	918	2252	-0.244916	-0.114483	-0.923003	-0.0668007	0.0802094	0.785257	0.266222	-0.427468	0.618271		0.128801
Klc1	MGI:107978	KLC1	HGNC:6387	ENSMUSG00000021288	ENSG00000126214	638	1792	-4.69823	-4.78008	-5.59697	-3.66939	-4.32609	-2.69715	-3.56421	-5.02509	0.363271		0.0575783
Klc2	MGI:107953	KLC2	HGNC:20716	ENSMUSG00000024862	ENSG00000174996	677	2256	-1.86102	-2.92787	-2.93747	-1.67909	-0.879255	-0.890188	-1.14951	-2.57545	0.372176		0.0326907
Klraq1	MGI:1921075	KLRAQ1	HGNC:30595	ENSMUSG00000034709	ENSG00000162869	1909	1351	-3.49994	-5.60001	-4.15673	-3.19334	-2.74811	-5.27813	-3.73986	-4.41889	0.624584		0.532973
Kpnb1	MGI:107532	KPNB1	HGNC:6400	ENSMUSG00000001440	ENSG00000108424	73	1535	-0.51393	-0.432413	-0.330668	1.04178	1.93111	0.365567	1.11282	-0.42567	0.344245		0.0280229
Kras	MGI:96680	KRAS	HGNC:6407	ENSMUSG00000030265	ENSG00000133703	2004	846	3.60479	4.02417	4.22218	2.51019	3.71473	2.61998	2.9483	3.95038	2.00289		0.078046
Ktn1	MGI:109153	KTN1	HGNC:6467	ENSMUSG00000021843	ENSG00000126777	1762	455	-1.55577	-1.92807	-0.919991	-1.70762	-3.19185	-2.03741	-2.31229	-1.46794	1.79546		0.19141
L1cam	MGI:96721	L1CAM	HGNC:6470	ENSMUSG00000031391	ENSG00000198910	1807	1818	1.08214	0.718082	0.912347	-0.107409	-0.605505	0.199853	-0.17102	0.90419	2.10703		0.0139032
Lancl1	MGI:1336997	LANCL1	HGNC:6508	ENSMUSG00000026000	ENSG00000115365	201	742	-3.1424	-3.02484	-2.36056	0.424193	-1.61067	0.208789	-0.325896	-2.8426	0.174741		0.0217971
Lancl2	MGI:1919085	LANCL2	HGNC:6509	ENSMUSG00000062190	ENSG00000132434	1021	430	-1.5626	-1.74529	-1.16668	-0.615393	-1.14984	0.275603	-0.496544	-1.49152	0.501744		0.0912498
Lasp1	MGI:109656	LASP1	HGNC:6513	ENSMUSG00000038366	ENSG00000002834	58	544	-0.752791	-0.447732	-1.01492	-0.570538	-0.675657	-0.291656	-0.512617	-0.738481	0.855083		0.32183
Ldhb	MGI:96763	LDHB	HGNC:6541	ENSMUSG00000030246	ENSG00000111716	1420	1203	-2.64783	-2.2985	-3.63595	2.52163	1.67559	1.18391	1.79371	-2.86076	0.0397067	+	0.00114044
Letm1	MGI:1932557	LETM1	HGNC:6556	ENSMUSG00000005299	ENSG00000168924	573	724	0.102654	0.0960511	0.114653	-0.394924	0.498959	-0.514633	-0.136866	0.104453	1.18207		0.492525
Lgi1	MGI:1861691	LGI1	HGNC:6572	ENSMUSG00000067242	ENSG00000108231	661	384	1.60658	2.34388	2.30812	-1.29225	-2.0083	-0.796624	-1.36572	2.0862	10.9429	+	0.00125873
Lgi3	MGI:2182619	LGI3	HGNC:18711	ENSMUSG00000033595	ENSG00000168481	1194	989	-2.39997	-1.25006	-2.15194	-1.65672	-4.58647	-2.06541	-2.76953	-1.93399	1.78453		0.442123
Lima1	MGI:1920992	LIMA1	HGNC:24636	ENSMUSG00000023022	ENSG00000050405	312	134	-4.23389	-4.53984	-4.02068	-2.78123	-0.646562	-2.25538	-1.89439	-4.2648	0.19339		0.0228807
Lin7a	MGI:2135609	LIN7A	HGNC:17787	ENSMUSG00000019906	ENSG00000111052	205	1661	-0.441524	0.0353851	-0.806436	-0.0674081	-1.22137	-0.68917	-0.659316	-0.404192	1.19344		0.570213
Lin7c	MGI:1330839	LIN7C	HGNC:17789	ENSMUSG00000027162	ENSG00000148943	636	886	2.47694	2.40591	2.09567	0.483135	0.995595	-1.0258	0.150977	2.32617	4.51647		0.0244421
Lingo1	MGI:1915522	LINGO1	HGNC:21205	ENSMUSG00000049556	ENSG00000169783	2074	831	-0.909281	-0.827623	-0.856694	-2.08506	-1.11669	-1.70484	-1.63553	-0.864533	1.70645		0.0525883
Lmo7	MGI:1353586	LMO7	HGNC:6646	ENSMUSG00000033060	ENSG00000136153	1931	2194	-1.62786	-0.935431	-1.59112	-0.584383	-0.785304	-1.12529	-0.83166	-1.3848	0.681533		0.114421
Lmtk2	MGI:3036247	LMTK2	HGNC:17880	ENSMUSG00000038970	ENSG00000164715	1374	871	-1.741	-2.38162	-2.9943	-3.80847	-4.48647	-5.37812	-4.55769	-2.37231	4.54845		0.0197452
Lmtk3	MGI:3039582	LMTK3	HGNC:19295	ENSMUSG00000062044	ENSG00000142235	1140	2065	-0.161123	-0.0731658	0.421733	-1.50406	-1.57367	-2.17222	-1.74998	0.0624813	3.51242	+	0.00289914
Lpcat4	MGI:2138993	LPCAT4	HGNC:30059	ENSMUSG00000027134	ENSG00000176454	1870	1663	-0.695873	-0.521368	-0.905615	-1.0339	-1.58436	-1.97379	-1.53068	-0.707619	1.76916		0.0490264
Lphn1	MGI:1929461	LPHN1	HGNC:20973	ENSMUSG00000013033	ENSG00000072071	1293	2370	-0.393551	-0.164769	-0.479412	-1.86083	-2.20675	-1.32615	-1.79791	-0.34591	2.73587		0.00599629
Lphn3	MGI:2441950	LPHN3	HGNC:20974	ENSMUSG00000037605	ENSG00000150471	1177	1846	-0.584017	-1.25286	-0.926386	-3.4188	-2.65	-2.44068	-2.83649	-0.921089	3.77219	+	0.00568358
Lrp1	MGI:96828	LRP1	HGNC:6692	ENSMUSG00000040249	ENSG00000123384	652	339	-5.21389	-4.39076	-3.52209	-1.08492	-3.62805	-3.28848	-2.66715	-4.37558	0.305992		0.141657
Lrrc47	MGI:1920196	LRRC47	HGNC:29207	ENSMUSG00000029028	ENSG00000130764	1224	917	-5.81147	-4.68583	-4.07428	-2.04744	-1.35242	-1.62497	-1.67494	-4.85719	0.110166	+	0.00435941
Lrrc59	MGI:2138133	LRRC59	HGNC:28817	ENSMUSG00000020869	ENSG00000108829	1906	479	1.10845	0.612779	0.809078	0.195257	-0.748499	-2.70206	-1.0851	0.843437	3.80669		0.0897187
Lrrc7	MGI:2676665	LRRC7	HGNC:18531	ENSMUSG00000028176	ENSG00000033122	2007	2326	3.41858	3.26695	3.6464	-0.634556	1.26364	1.07631	0.568461	3.44398	7.33866		0.00942057
Lrrc8a	MGI:2652847	LRRC8A	HGNC:19027	ENSMUSG00000007476	ENSG00000136802	84	586	-0.373145	-0.564658	0.327175	-0.483126	-0.713367	-2.03012	-1.07554	-0.203543	1.83019		0.189898
Lrrtm4	MGI:2389180	LRRTM4	HGNC:19411	ENSMUSG00000052581	ENSG00000176204	2073	994	-2.74393	-1.11522	-1.361	-4.64919	-2.79568	0.0971257	-2.44925	-1.74005	1.6349		0.654946
Lsamp	MGI:1261760	LSAMP	HGNC:6705	ENSMUSG00000061080	ENSG00000185565	456	1060	4.6644	5.79203	6.01495	2.92728	3.44831	3.68435	3.35331	5.49046	4.39891		0.0107569
Ly6h	MGI:1346030	LY6H	HGNC:6728	ENSMUSG00000022577	ENSG00000176956	509	834	-1.07773	-0.919495	-0.949529	-2.74601	-2.50593	-2.14554	-2.46583	-0.982251	2.79641	+	0.00121001
Lyn	MGI:96892	LYN	HGNC:6735	ENSMUSG00000042228	ENSG00000147507	952	1237	-5.06418	-5.05137	-5.06375	-2.75714	-4.39753	-2.88194	-3.34554	-5.05977	0.304765		0.0313375
Mag	MGI:96912	MAG	HGNC:6783	ENSMUSG00000036634	ENSG00000105695	841	1240	-2.98297	-3.95404	-2.82218	-1.78003	-3.49822	-4.02299	-3.10041	-3.25306	0.899594		0.85139
Magi2	MGI:1354953	MAGI2	HGNC:18957	ENSMUSG00000040003	ENSG00000187391	1836	1703	-6.61861	-5.02618	-4.072	-3.83406	-3.72436	-4.71145	-4.08996	-5.23893	0.450947		0.227048
Mal2	MGI:2146021	MAL2	HGNC:13634	ENSMUSG00000024479	ENSG00000147676	1056	1036	4.97981	5.12162	5.30231	0.742307	2.14981	0.750815	1.21431	5.13458	15.1397	+	0.00119447
Maob	MGI:96916	MAOB	HGNC:6834	ENSMUSG00000040147	ENSG00000069535	1743	1121	-2.82548	-3.16448	-2.82266	-1.86497	1.13895	0.465793	-0.086745	-2.93754	0.13862		0.03593
Map1lc3a	MGI:1915661	MAP1LC3A	HGNC:6838	ENSMUSG00000027602	ENSG00000101460	1984	909	1.15218	0.476116	0.595115	1.79238	2.04119	1.73941	1.85766	0.741136	0.461203		0.00808545
Map2k1	MGI:1346866	MAP2K1	HGNC:6840	ENSMUSG00000004936	ENSG00000169032			-0.111633	0.756874	0.646241	1.50337	1.49072	2.22724	1.74044	0.430494	0.403336
Mapk1	MGI:1346858	MAPK1	HGNC:6871	ENSMUSG00000063358	ENSG00000100030			-1.80349	-1.04272	-2.23228	0.991588	-0.670346	2.19608	0.839108	-1.69283	0.172906
Mapk8ip3	MGI:1353598	MAPK8IP3	HGNC:6884	ENSMUSG00000024163	ENSG00000138834	129	359	-1.80349	-1.04272	-2.23228	0.991588	-0.670346	2.19608	0.839108	-1.69283	0.172906		0.048284
Mapre2	MGI:106271	MAPRE2	HGNC:6891	ENSMUSG00000024277	ENSG00000166974	2418	2383	-4.58256	-2.72572	-3.02446	0.960871	0.353392	1.59142	0.96856	-3.44424	0.0469476	+	0.00286934
Mapre3	MGI:2140967	MAPRE3	HGNC:6892	ENSMUSG00000029166	ENSG00000084764	575	1659	-0.833412	-0.424502	-2.38846	1.23771	2.91606	2.6232	2.25899	-1.21546	0.0899676		0.0117643
Mapt	MGI:97180	MAPT	HGNC:6893	ENSMUSG00000018411	ENSG00000186868	1463	168	4.14074	4.29154	4.38413	3.00074	2.83736	4.01952	3.28587	4.27214	1.98105		0.058861
Mark1	MGI:2664902	MARK1	HGNC:6896	ENSMUSG00000026620	ENSG00000116141	1303	2411	-0.234632	-0.427238	0.809014	-3.1859	-2.21523	-3.7829	-3.06134	0.0490478	8.63615		0.00646326
Mark2	MGI:99638	MARK2	HGNC:3332	ENSMUSG00000024969	ENSG00000072518	2159	2092	1.55002	1.43429	2.01863	-1.12113	-0.536346	-1.34833	-1.00193	1.66765	6.36244	+	0.00088907
Mark4	MGI:1920955	MARK4	HGNC:13538	ENSMUSG00000030397	ENSG00000007047	1640	1219	-1.70579	-1.37674	-0.794199	-3.41147	-1.4074	-2.54123	-2.45337	-1.29224	2.23631		0.143114
Mbp	MGI:96925	MBP	HGNC:6925	ENSMUSG00000041607	ENSG00000197971	1354	1076	5.96577	5.34316	5.17706	7.4043	5.67574	6.00167	6.36057	5.49533	0.548955		0.211356
Mdh1	MGI:97051	MDH1	HGNC:6970	ENSMUSG00000020321	ENSG00000014641	2420	1622	7.5571	5.87729	7.42558	2.41694	1.99331	0.586846	1.6657	6.95332	39.0601	+	0.00238457
Mdh2	MGI:97050	MDH2	HGNC:6971	ENSMUSG00000019179	ENSG00000146701	1553	1527	-0.680328	0.500696	0.0973609	2.55887	1.56692	1.09078	1.73886	-0.0274236	0.293966		0.0333068
Mff	MGI:1922984	MFF	HGNC:24858	ENSMUSG00000026150	ENSG00000168958	790	1876	-0.494859	-0.650171	-1.50531	-0.431659	-1.56149	-0.825123	-0.939425	-0.883446	1.03956		0.908303
Mink1	MGI:1355329	MINK1	HGNC:17565	ENSMUSG00000020827	ENSG00000141503	1399	528	0.930893	0.962204	0.871318	-0.305035	0.0346212	-0.00808213	-0.092832	0.921472	2.01993	+	0.000771127
Mlec	MGI:1924015	MLEC	HGNC:28973	ENSMUSG00000048578	ENSG00000110917	927	1389	-0.875773	-4.97673	-2.1546	1.33543	1.8117	1.57636	1.57449	-2.66904	0.0527923		0.0253414
Mlf2	MGI:1353554	MLF2	HGNC:7126	ENSMUSG00000030120	ENSG00000089693	735	255	1.12689	0.964677	0.98104	0.341192	0.117638	0.720483	0.393104	1.0242	1.54874		0.0262448
Mllt4	MGI:1314653	MLLT4	HGNC:7137	ENSMUSG00000068036	ENSG00000130396	746	2330	-0.487608	-0.465755	-0.444166	-2.91107	-1.40835	-1.36345	-1.89429	-0.465843	2.69157		0.0484161
Mogs	MGI:1929872	MOGS	HGNC:24862	ENSMUSG00000030036	ENSG00000115275	1745	1556	-1.05716	-1.20044	-1.00418	-1.34042	-1.37839	-2.34784	-1.68888	-1.08726	1.51742		0.146785
Mpp1	MGI:105941	MPP1	HGNC:7219	ENSMUSG00000031402	ENSG00000130830	1311	911	-4.39884	-2.74643	-5.01878	0.935887	-1.32178	-1.09532	-0.49374	-4.05468	0.0847323		0.022636
Mpp2	MGI:1858257	MPP2	HGNC:7220	ENSMUSG00000017314	ENSG00000108852	1392	546	0.9244	1.02957	1.28836	-0.873537	-1.07935	0.321877	-0.543669	1.08078	3.08323		0.0225621
Mpp6	MGI:1927340	MPP6	HGNC:18167	ENSMUSG00000038388	ENSG00000105926	1696	507	-2.21515	-1.22424	-1.27374	-2.92806	-2.2537	-1.75181	-2.31119	-1.57104	1.67035		0.189739
Mprip	MGI:1349438	MPRIP	HGNC:30321	ENSMUSG00000005417	ENSG00000133030	1197	1809	-2.2245	-2.31832	-2.08653	-0.192651	-1.24629	-0.526802	-0.655249	-2.20978	0.340439		0.00811751
Msn	MGI:97167	MSN	HGNC:7373	ENSMUSG00000031207	ENSG00000147065	1426	91	-2.3383	-2.13309	-2.721	2.05033	2.76073	2.12047	2.31051	-2.39746	0.0382612	+	7.77625e-05
Mtap1a	MGI:1306776	MAP1A	HGNC:6835	ENSMUSG00000027254	ENSG00000166963	642	1836	-1.9385	-1.81029	-1.79328	-1.25727	-2.4289	-3.9678	-2.55132	-1.84735	1.62898		0.421177
Mtap1b	MGI:1306778	MAP1B	HGNC:6836	ENSMUSG00000052727	ENSG00000131711	311	2397	-0.776461	-0.724448	-2.29052	1.27012	0.728201	-0.123637	0.624895	-1.26381	0.270049		0.0447454
Mtap2	MGI:97175	MAP2	HGNC:6839	ENSMUSG00000015222	ENSG00000078018	136	2394	2.1156	2.28761	1.89804	0.775545	1.56673	1.1825	1.17492	2.10042	1.89933		0.0220942
Mtap4	MGI:97178	MAP4	HGNC:6862	ENSMUSG00000047011	ENSG00000047849	1903	1827	-5.00457	-4.36009	-3.77108	-1.46443	-2.13672	-1.78697	-1.79604	-4.37858	0.166947	+	0.00312148
Mtap6	MGI:1201690	MAP6	HGNC:6868	ENSMUSG00000055407	ENSG00000171533	2002	234	1.26627	1.18113	1.44454	0.208796	0.573138	1.53458	0.772172	1.29731	1.43907		0.262488
Mtch1	MGI:1929261	MTCH1	HGNC:17586	ENSMUSG00000024012	ENSG00000137409	1878	899	0.324242	0.0473644	-0.116098	1.91925	0.23194	0.827385	0.992858	0.0851695	0.533038		0.150028
Mtch2	MGI:1929260	MTCH2	HGNC:17587	ENSMUSG00000027282	ENSG00000109919	135	755	0.757125	1.51264	0.462003	1.78543	1.40875	-0.775812	0.806124	0.91059	1.0751		0.908913
Mtdh	MGI:1914404	MTDH	HGNC:29608	ENSMUSG00000022255	ENSG00000147649	1759	1563	-0.44406	-0.913021	-1.20408	-0.565625	-1.34409	-1.27012	-1.05995	-0.853719	1.15367		0.568698
Mthfd1	MGI:1342005	MTHFD1	HGNC:7432	ENSMUSG00000021048	ENSG00000100714	1394	458	0.31827	0.0855319	0.257365	0.190184	-0.078295	0.298257	0.136715	0.220389	1.05971		0.560185
Myh10	MGI:1930780	MYH10	HGNC:7568	ENSMUSG00000020900	ENSG00000133026	2303	1636	4.74385	4.95886	5.2364	3.23292	4.85437	4.42831	4.17187	4.9797	1.75058		0.185489
Myh14	MGI:1919210	MYH14	HGNC:23212	ENSMUSG00000030739	ENSG00000105357	2450	1912	-0.312024	-0.113729	0.118917	0.503467	0.799361	0.325485	0.542771	-0.102278	0.639471		0.0256441
Myh9	MGI:107717	MYH9	HGNC:7579	ENSMUSG00000022443	ENSG00000100345	621	473	2.74459	2.7202	2.69953	2.64959	3.90068	2.80452	3.11826	2.72144	0.759529		0.370806
Myl12b	MGI:107494	MYL12B	HGNC:29827	ENSMUSG00000034868	ENSG00000118680	1028	50	1.7041	-0.133878	0.486764	2.02205	2.49116	1.3603	1.95784	0.685661	0.414035		0.114277
Myl6	MGI:109318	MYL6	HGNC:7587	ENSMUSG00000060680	ENSG00000092841	1810	1685	2.46797	1.44495	2.28531	3.54524	4.18626	3.83139	3.85429	2.06608	0.28953		0.00808855
Myo18a	MGI:2667185	MYO18A	HGNC:31104	ENSMUSG00000000631	ENSG00000196535	2270	2116	-0.286678	-0.127559	-0.360984	0.0748185	-1.08726	-0.7296	-0.58068	-0.258407	1.2503		0.409829
Myo1c	MGI:106612	MYO1C	HGNC:7597	ENSMUSG00000017774	ENSG00000197879	369	2018	-3.07526	-2.96185	-3.61452	-5.84009	-1.6949	-4.8626	-4.13253	-3.21721	1.88599		0.510056
Myo1d	MGI:107728	MYO1D	HGNC:7598	ENSMUSG00000035441	ENSG00000176658	1784	1829	-0.950903	-0.5084	-0.366819	0.403644	-2.17873	-0.0269177	-0.600669	-0.608707	0.994444		0.99263
Myo5a	MGI:105976	MYO5A	HGNC:7602	ENSMUSG00000034593	ENSG00000197535	2374	2410	5.2618	5.59553	5.11	3.93426	4.13251	4.38321	4.14999	5.32244	2.25394	+	0.00374434
Myo6	MGI:104785	MYO6	HGNC:7605	ENSMUSG00000033577	ENSG00000196586	2335	2301	0.987986	0.683569	0.379006	0.673986	0.385096	-0.508918	0.183388	0.68352	1.41434		0.276336
Napa	MGI:104563	NAPA	HGNC:7641	ENSMUSG00000006024	ENSG00000105402	321	331	-3.45203	-2.81972	-3.15289	-2.84316	-1.6321	-2.85724	-2.44416	-3.14155	0.61669		0.192329
Napb	MGI:104562	NAPB	HGNC:15751	ENSMUSG00000027438	ENSG00000125814	2261	1384	0.0296685	0.316271	-1.09419	2.53827	2.86704	2.08719	2.4975	-0.249416	0.148969	+	0.00483316
Napg	MGI:104561	NAPG	HGNC:7642	ENSMUSG00000024581	ENSG00000134265	1590	81	0.0923131	-0.296348	-1.05509	0.850439	0.803663	1.75062	1.13491	-0.419707	0.34042		0.0271557
Ncam1	MGI:97281	NCAM1	HGNC:7656	ENSMUSG00000039542	ENSG00000149294	2320	462	2.26544	1.54686	2.11733	0.771936	1.34326	1.24561	1.12027	1.97654	1.81036		0.0382403
Ncam2	MGI:97282	NCAM2	HGNC:7657	ENSMUSG00000022762	ENSG00000154654	1838	604	-1.39922	-1.17775	-1.79105	-1.58849	-2.49093	-1.30536	-1.79493	-1.45601	1.26481		0.444469
Ncan	MGI:104694	NCAN	HGNC:2465	ENSMUSG00000002341	ENSG00000130287	1174	860	1.3719	0.392838	0.156541	0.897135	-0.900335	0.323767	0.106855	0.640425	1.44751		0.456294
Ncdn	MGI:1347351	NCDN	HGNC:17597	ENSMUSG00000028833	ENSG00000020129	2156	1594	-2.34423	-0.802757	-2.76211	0.424996	1.76647	1.12852	1.10666	-1.9697	0.118556		0.0123621
Nckap1	MGI:1355333	NCKAP1	HGNC:7666	ENSMUSG00000027002	ENSG00000061676	996	1465	2.49604	2.8259	3.17469	2.0412	2.02923	3.05516	2.37519	2.83221	1.3727		0.308895
Nckipsd	MGI:1931834	NCKIPSD	HGNC:15486	ENSMUSG00000032598	ENSG00000213672	322	2019	-3.00345	-3.0117	-2.35069	-2.61923	-1.47569	-2.06051	-2.05181	-2.78861	0.600068		0.136422
Ndel1	MGI:1932915	NDEL1	HGNC:17620	ENSMUSG00000018736	ENSG00000166579	228	1452	-0.688888	-0.923251	-0.629798	-1.07887	-0.793278	-0.93943	-0.937192	-0.747312	1.14067		0.193924
Ndufa13	MGI:1914434	NDUFA13	HGNC:17194	ENSMUSG00000036199	ENSG00000130288	1446	1265	-4.00005	0.244776	-4.1831	-2.26705	-2.21048	-2.69685	-2.39146	-2.64613	0.838182		0.86952
Ndufa4	MGI:107686	NDUFA4	HGNC:7687	ENSMUSG00000029632	ENSG00000189043	415	563	-0.36348	-1.07914	-2.25047	1.05203	-1.54941	0.245594	-0.0839304	-1.23103	0.451532		0.291702
Ndufa7	MGI:1913666	NDUFA7	HGNC:7691	ENSMUSG00000041881	ENSG00000167774	2045	693	-2.02429	-2.01552	-3.29921	-2.40797	-0.943278	-1.48315	-1.61146	-2.44634	0.560632		0.239029
Ndufb4	MGI:1915444	NDUFB4	HGNC:7699	ENSMUSG00000022820	ENSG00000124399	1458	766	-1.19787	-1.76501	-2.41024	-1.4243	-1.94686	-2.37551	-1.91556	-1.79104	1.09014		0.793633
Ndufb8	MGI:1914514	NDUFB8	HGNC:7703	ENSMUSG00000025204	ENSG00000166136	922	1751	-1.07637	-2.74763	-5.07158	0.0906973	-0.705774	-2.0164	-0.877158	-2.96519	0.235201		0.186504
Ndufs1	MGI:2443241	NDUFS1	HGNC:7707	ENSMUSG00000025968	ENSG00000023228	2166	1356	1.06816	1.80102	0.624092	1.54232	1.84531	0.566475	1.31804	1.16442	0.898996		0.780893
Ndufs2	MGI:2385112	NDUFS2	HGNC:7708	ENSMUSG00000013593	ENSG00000158864	808	618	-1.6781	-2.08788	-4.00023	-1.98571	-2.45112	-2.045	-2.16061	-2.58874	0.743226		0.589246
Ndufs3	MGI:1915599	NDUFS3	HGNC:7710	ENSMUSG00000005510	ENSG00000213619	826	411	0.648306	0.652307	-0.261974	1.51437	0.765662	0.694148	0.991393	0.346213	0.639413		0.183427
Ndufs7	MGI:1922656	NDUFS7	HGNC:7714	ENSMUSG00000020153	ENSG00000115286	1737	382	-1.10836	-2.91272	-2.37629	-1.73577	-2.66821	-3.59572	-2.66657	-2.13245	1.44805		0.519867
Ndufv1	MGI:107851	NDUFV1	HGNC:7716	ENSMUSG00000037916	ENSG00000167792	917	700	0.304897	1.07234	0.684851	1.16626	2.3577	1.12975	1.55124	0.687362	0.549474		0.13372
Nebl	MGI:1921353	NEBL	HGNC:16932	ENSMUSG00000053702	ENSG00000078114	1986	374	-1.70218	-1.15306	-1.05139	-0.505707	-0.100664	-0.770188	-0.458853	-1.30221	0.557345		0.0397415
Nefh	MGI:97309	NEFH	HGNC:7737	ENSMUSG00000020396	ENSG00000100285	2412	179	1.97119	-0.0625476	1.56878	1.12175	1.47083	1.58412	1.39223	1.15914	0.850809		0.73302
Nefl	MGI:97313	NEFL	HGNC:7739	ENSMUSG00000022055	ENSG00000104725	1510	2094	5.11116	5.28188	4.84482	5.87608	6.58128	6.89981	6.45239	5.07929	0.38606		0.0138646
Nefm	MGI:97314	NEFM	HGNC:7734	ENSMUSG00000022054	ENSG00000104722	1378	1531	4.809	4.53076	4.36186	5.48466	5.75593	6.49784	5.91281	4.56721	0.39349		0.0150798
Negr1	MGI:2444846	NEGR1	HGNC:17302	ENSMUSG00000040037	ENSG00000172260	1250	1578	4.46312	3.98894	4.12248	2.44938	3.19	2.2519	2.63043	4.19151	2.95076		0.00803861
Nfasc	MGI:104753	NFASC	HGNC:29866	ENSMUSG00000026442	ENSG00000163531	1867	1538	2.79155	2.33873	2.79122	2.79662	2.67189	3.13187	2.86679	2.6405	0.854829		0.329577
Nipsnap1	MGI:1278344	NIPSNAP1	HGNC:7827	ENSMUSG00000034285	ENSG00000184117	1705	232	0.40691	0.560311	-0.532374	-0.195162	0.321207	-0.886751	-0.253569	0.144949	1.31815		0.460817
Nlgn2	MGI:2681835	NLGN2	HGNC:14290	ENSMUSG00000051790	ENSG00000169992	1251	2035	2.24368	2.25718	2.99678	-0.201387	1.17566	0.109147	0.361142	2.49921	4.40174		0.0116643
Nme1	MGI:97355	NME1	HGNC:7849	ENSMUSG00000037601	NOT_FOUND	842	739	-1.3711	-2.32466	-1.81316	1.54673	1.60714	0.838684	1.33085	-1.83631	0.111324	+	0.00102087
Nnt	MGI:109279	NNT	HGNC:7863	ENSMUSG00000025453	ENSG00000112992	1816	1368	-3.10949	-3.10747	-7.2024	0.527919	-0.071521	0.226137	0.227512	-4.47312	0.0384563		0.0268483
Nomo1	MGI:2385850	NOMO1	HGNC:30060	ENSMUSG00000030835	ENSG00000103226	1773	1049	-3.55673	-4.36064	-3.99447	-2.87437	-3.00141	-3.94222	-3.27267	-3.97061	0.61645		0.163248
Npm1	MGI:106184	NPM1	HGNC:7910	ENSMUSG00000057113	ENSG00000214774	1488	600	0.0661314	-0.201072	-0.38129	-0.597923	1.342	1.27056	0.671546	-0.172077	0.557242		0.263011
Nptn	MGI:108077	NPTN	HGNC:17867	ENSMUSG00000032336	ENSG00000156642	2218	2199	2.03561	2.14337	1.85604	-5.44943	-1.96257	-2.29075	-3.23425	2.01167	37.9472		0.00926883
Nptx1	MGI:107811	NPTX1	HGNC:7952	ENSMUSG00000025582	ENSG00000171246	1478	567	-1.89206	-1.90607	-1.39785	-1.04079	1.41769	-1.39906	-0.340723	-1.732	0.381228		0.197396
Nrcam	MGI:104750	NRCAM	HGNC:7994	ENSMUSG00000020598	ENSG00000091129	1802	1639	-2.96739	-3.03137	-2.74243	-2.40432	-2.15266	-1.31866	-1.95855	-2.91373	0.515778		0.0481806
Nrn1	MGI:1915654	NRN1	HGNC:17972	ENSMUSG00000039114	ENSG00000124785	2087	1199	-0.00489708	0.0481942	-0.190729	-1.49843	-1.88265	-0.466787	-1.28262	-0.0491439	2.35134		0.0451953
Nrxn1	MGI:1096391	NRXN1	HGNC:8008	ENSMUSG00000024109	ENSG00000179915	2032	1229	-1.59959	-1.03582	-1.09901	-2.27818	-1.85318	-1.36226	-1.8312	-1.24481	1.50149		0.139985
Nrxn3	MGI:1096389	NRXN3	HGNC:8010	ENSMUSG00000066392	ENSG00000021645	1359	1189	-0.599938	-1.11545	-0.525491	-2.60316	-2.58635	-2.82809	-2.67253	-0.746959	3.79887	+	0.000665964
Nsf	MGI:104560	NSF	HGNC:8016	ENSMUSG00000034187	ENSG00000073969	222	2190	3.05092	4.06606	3.77052	3.36087	4.80555	4.16327	4.1099	3.62917	0.716614		0.403654
Nt5e	MGI:99782	NT5E	HGNC:8021	ENSMUSG00000032420	ENSG00000135318	329	439	-4.96578	-4.08524	-5.00397	-2.57539	-2.70959	-3.79696	-3.02731	-4.685	0.316948		0.0276246
Ntm	MGI:2446259	NTM	HGNC:17941	ENSMUSG00000059974	ENSG00000182667	2031	1780	5.52612	5.31606	5.20702	2.99332	2.73973	2.76378	2.83228	5.34973	5.72572	+	3.44158e-05
Numbl	MGI:894702	NUMBL	HGNC:8061	ENSMUSG00000063160	ENSG00000105245	104	1330	0.709378	0.835171	0.651707	-0.857839	-0.320667	-0.580307	-0.586271	0.732086	2.49382	+	0.00130832
Ogdh	MGI:1098267	OGDH	HGNC:8124	ENSMUSG00000020456	ENSG00000105953	1103	1882	0.185875	-0.100413	-0.677003	0.374929	0.343994	-0.33624	0.127561	-0.19718	0.798442		0.39845
Ogdhl	MGI:3616088	OGDHL	HGNC:25590	ENSMUSG00000021913	ENSG00000197444	2191	1656	-0.200821	-1.7053	-1.42301	-0.998882	-0.389114	-1.70085	-1.02962	-1.10971	0.945997		0.899808
Ogt	MGI:1339639	OGT	HGNC:8127	ENSMUSG00000034160	ENSG00000147162	2173	2329	-2.89297	-3.60521	-2.79351	0.841891	-0.216251	-0.46149	0.0547166	-3.09723	0.112504	+	0.00266836
Olfm1	MGI:1860437	OLFM1	HGNC:17187	ENSMUSG00000026833	ENSG00000130558	581	890	1.59718	2.02	1.84729	-0.134934	1.04772	0.434131	0.448974	1.82149	2.58921		0.0193963
Olfm3	MGI:2387329	OLFM3	HGNC:17990	ENSMUSG00000027965	ENSG00000118733	41	958	-2.42304	-0.809724	0.277232	-0.180349	-1.61707	-0.595529	-0.797649	-0.985176	0.87811		0.843942
Omg	MGI:106586	OMG	HGNC:8135	ENSMUSG00000049612	ENSG00000126861	1614	867	2.5489	1.80502	2.71996	1.83921	1.22991	1.37275	1.48062	2.35796	1.83698		0.0592242
Opa1	MGI:1921393	OPA1	HGNC:8140	ENSMUSG00000038084	ENSG00000198836	233	291	1.49786	-0.0981351	0.637857	1.19983	2.17413	0.54945	1.3078	0.679195	0.6468		0.394797
Opcml	MGI:97397	OPCML	HGNC:8143	ENSMUSG00000062257	ENSG00000183715	74	1979	4.87765	4.84667	4.92627	3.76169	3.79068	3.64738	3.73325	4.88353	2.21957	+	2.03215e-05
Pabpc1	MGI:1349722	PABPC1	HGNC:8554	ENSMUSG00000022283	ENSG00000070756	304	515	0.313308	0.173185	0.442465	-1.51906	-0.33135	-0.920697	-0.923702	0.309653	2.35113		0.024714
Pacs1	MGI:1277113	PACS1	HGNC:30032	ENSMUSG00000024855	ENSG00000175115	1835	1502	-0.402859	-0.899493	-0.418101	-1.99518	-1.6385	-1.12244	-1.58537	-0.573484	2.01655		0.0283397
Pacsin1	MGI:1345181	PACSIN1	HGNC:8570	ENSMUSG00000040276	ENSG00000124507	404	493	-0.663867	-1.28468	-0.778191	1.70387	2.58097	3.17049	2.48511	-0.908912	0.0951258	+	0.00190135
Pak1	MGI:1339975	PAK1	HGNC:8590	ENSMUSG00000030774	ENSG00000149269	2224	793	-2.26882	-1.21384	-2.6268	0.495821	0.470622	1.00797	0.658139	-2.03649	0.154467	+	0.00419873
Palm	MGI:1261814	PALM	HGNC:8594	ENSMUSG00000035863	ENSG00000099864	1679	656	0.828554	0.538459	1.61808	-1.35751	-1.45511	-1.39762	-1.40341	0.99503	5.27233	+	0.00177278
Pcbp1	MGI:1345635	PCBP1	HGNC:8647	ENSMUSG00000051695	ENSG00000169564	549	639	-0.463832	0.595146	0.232428	2.22634	-0.312389	2.5625	1.49215	0.121247	0.38665		0.22615
Pcbp2	MGI:108202	PCBP2	HGNC:8648	ENSMUSG00000056851	ENSG00000197111	421	605	-1.42459	-0.254505	-0.594116	-0.204009	-0.435397	0.682969	0.014521	-0.757737	0.5855		0.187819
Pclo	MGI:1349390	PCLO	HGNC:13406	ENSMUSG00000061601	ENSG00000186472	1951	1103	-3.6401	-2.70798	-2.64785	-4.71424	-4.73373	-7.08058	-5.50952	-2.99864	5.69964		0.0416138
Pde2a	MGI:2446107	PDE2A	HGNC:8777	ENSMUSG00000030653	ENSG00000186642	2043	2292	2.56721	2.27637	3.31616	-0.532477	0.87718	0.408609	0.251104	2.71991	5.53587		0.00883112
Pdha1	MGI:97532	PDHA1	HGNC:8806	ENSMUSG00000031299	ENSG00000131828	2189	1629	2.4565	1.65792	2.90123	1.10606	1.58708	0.942648	1.21193	2.33855	2.18348		0.052182
Pdhb	MGI:1915513	PDHB	HGNC:8808	ENSMUSG00000021748	ENSG00000168291	144	756	1.90065	1.90944	1.76257	1.83015	1.53269	1.32422	1.56235	1.85755	1.22705		0.128304
Pdhx	MGI:1351627	PDHX	HGNC:21350	ENSMUSG00000010914	ENSG00000110435	1645	1057	-0.853914	-0.349786	-0.4964	-0.63668	-0.447951	-2.27604	-1.12022	-0.5667	1.46767		0.408077
Pdia3	MGI:95834	PDIA3	HGNC:4606	ENSMUSG00000027248	ENSG00000167004	809	1233	-3.88134	-4.25303	-4.74784	-0.797202	-0.356643	-0.558952	-0.570932	-4.29407	0.0757224	+	0.000188629
Pfkl	MGI:97547	PFKL	HGNC:8876	ENSMUSG00000020277	ENSG00000141959	1790	1744	-5.25099	-4.10721	-5.04859	-4.85806	-0.40146	-1.48091	-2.24681	-4.80226	0.170111		0.139374
Pfkm	MGI:97548	PFKM	HGNC:8877	ENSMUSG00000033065	ENSG00000152556	2242	1607	0.826887	1.39134	1.27812	1.00702	1.96353	1.50115	1.49057	1.16545	0.798232		0.374491
Pfkp	MGI:1891833	PFKP	HGNC:8878	ENSMUSG00000021196	ENSG00000067057	342	519	1.36132	2.45776	2.75734	0.605947	1.60131	1.41581	1.20769	2.19214	1.97856		0.132875
Pgam1	MGI:97552	PGAM1	HGNC:8888	ENSMUSG00000011752	ENSG00000186076	2047	1931	-0.244185	0.482013	-1.33513	1.58174	1.19614	0.937656	1.23851	-0.365767	0.3289		0.0457677
Phactr1	MGI:2659021	PHACTR1	HGNC:20990	ENSMUSG00000054728	ENSG00000112137	907	2230	0.900892	1.21662	0.741335	-1.83767	0.0310974	-0.3076	-0.704723	0.95295	3.15507		0.0487038
Phb	MGI:97572	PHB	HGNC:8912	ENSMUSG00000038845	ENSG00000167085	567	815	2.47996	1.74786	0.613441	1.97542	2.14925	0.840806	1.65516	1.61375	0.971709		0.954405
Phb2	MGI:102520	PHB2	HGNC:30306	ENSMUSG00000004264	ENSG00000215021	868	1498	2.75366	2.27935	1.45453	3.71008	3.10857	1.99408	2.93758	2.16252	0.584363		0.285929
Phgdh	MGI:1355330	PHGDH	HGNC:8923	ENSMUSG00000053398	ENSG00000092621	393	1120	-0.179422	0.62198	-0.321477	2.95649	2.0111	3.28058	2.74939	0.0403603	0.152933	+	0.00488656
Phldb1	MGI:2143230	PHLDB1	HGNC:23697	ENSMUSG00000048537	ENSG00000019144	1967	1551	-2.42767	-3.61551	-5.56528	-2.66797	-2.36488	-4.29608	-3.10964	-3.86949	0.590561		0.525442
Pi4ka	MGI:2448506	PI4KA	HGNC:8983	ENSMUSG00000041720	ENSG00000215513	1090	235	0.587448	0.995293	0.68148	-0.667663	0.247206	0	-0.140152	0.75474	1.85947		0.0405279
Pip4k2a	MGI:1298206	PIP4K2A	HGNC:8997	ENSMUSG00000026737	ENSG00000150867	338	229	-0.253172	-0.522266	-0.000564041	3.53855	2.4402	3.61898	3.19925	-0.258667	0.0910048	+	0.00107213
Pip4k2b	MGI:1934234	PIP4K2B	HGNC:8998	ENSMUSG00000018547	ENSG00000141720	1353	1621	-0.866432	-1.25333	-0.665025	0.0416817	1.1069	1.14019	0.762923	-0.928263	0.309672		0.013383
Pkm2	MGI:97591	PKM2	HGNC:9021	ENSMUSG00000032294	ENSG00000067225	1484	2332	-0.891749	-0.56178	-1.13517	1.53262	3.70636	4.30589	3.18162	-0.8629	0.0606006		0.0092392
Pkp4	MGI:109281	PKP4	HGNC:9026	ENSMUSG00000026991	ENSG00000144283	2257	2071	1.83808	1.79707	1.9897	0.352558	0.533041	0.49489	0.460163	1.87495	2.6662	+	6.09495e-05
Plcb1	MGI:97613	PLCB1	HGNC:15917	ENSMUSG00000051177	ENSG00000182621	1436	2028	2.50715	-0.68304	-1.40393	0.422711	0.587604	0.378869	0.463061	0.140059	0.799405		0.801656
Plekha6	MGI:2388662	PLEKHA6	HGNC:17053	ENSMUSG00000041757	ENSG00000143850	260	1325	-2.69005	-2.71137	-2.16104	-1.73384	-1.25687	-1.17692	-1.38921	-2.52082	0.456406		0.0106419
Pllp	MGI:1915051	PLLP	HGNC:18553	ENSMUSG00000031775	ENSG00000102934	1013	416	3.13032	3.31932	2.7313	5.95218	4.05082	4.85749	4.9535	3.06031	0.269212		0.0305652
Plp1	MGI:97623	PLP1	HGNC:9086	ENSMUSG00000031425	ENSG00000123560	1440	406	0.0363329	0.608684	-0.352823	3.60674	3.87033	4.16807	3.88172	0.0973981	0.0725783	+	0.000303161
Plxna1	MGI:107685	PLXNA1	HGNC:9099	ENSMUSG00000030084	ENSG00000114554	2144	904	-3.93672	-3.52243	-3.49551	-2.66731	-1.45863	-1.64159	-1.92251	-3.65155	0.301652		0.0126689
Plxna4	MGI:2179061	PLXNA4	HGNC:9102	ENSMUSG00000029765	ENSG00000220225	1191	1011	-4.83125	-4.61127	-4.85867	-4.46952	-3.7268	-2.96648	-3.72093	-4.76706	0.484265		0.0765966
Ppfia1	MGI:1924750	PPFIA1	HGNC:9245	ENSMUSG00000037519	ENSG00000131626	1181	2396	-4.02572	-2.5111	-1.65568	-4.29725	-4.198	-3.63728	-4.04418	-2.73083	2.48517		0.143353
Ppfia2	MGI:2443834	PPFIA2	HGNC:9246	ENSMUSG00000053825	ENSG00000139220	2452	1100	1.48441	1.61424	1.00484	0.634323	0.794713	1.17123	0.866755	1.36783	1.41527		0.109519
Ppfia3	MGI:1924037	PPFIA3	HGNC:9247	ENSMUSG00000003863	ENSG00000177380	1917	1771	0.0609609	-0.190248	-0.37224	0.0708015	0.155417	0.732799	0.319672	-0.167176	0.713582		0.115627
Ppfia4	MGI:1915757	PPFIA4	HGNC:9248	ENSMUSG00000026458	ENSG00000143847	2183	2406	0.713228	0.672738	0.461757	-2.25735	-3.30772	-2.39673	-2.65393	0.615908	9.64541	+	0.000642212
Ppia	MGI:97749	PPIA	HGNC:9253	ENSMUSG00000071866	ENSG00000196262	1994	2096	-1.7948	-3.1069	-2.89348	2.08501	3.05348	2.37512	2.50454	-2.59839	0.0290981	+	0.000509666
Ppp1ca	MGI:103016	PPP1CA	HGNC:9281	ENSMUSG00000040385	ENSG00000172531	2140	686	2.71965	3.51755	3.82327	1.28509	0.52705	1.9962	1.26944	3.35349	4.23994		0.0178058
Ppp1cb	MGI:104871	PPP1CB	HGNC:9282	ENSMUSG00000014956	ENSG00000213639	1391	1388	0.514573	0.845649	1.00782	0.369104	-0.0818771	1.01968	0.435634	0.789347	1.27784		0.370754
Ppp1cc	MGI:104872	PPP1CC	HGNC:9283	ENSMUSG00000004455	ENSG00000186298	198	1169	2.02979	2.0731	2.36874	-0.802971	-0.100633	0.20773	-0.231958	2.15721	5.23855	+	0.00166897
Ppp1r9a	MGI:2442401	PPP1R9A	HGNC:14946	ENSMUSG00000032827	ENSG00000158528	289	1620	0.683577	0.198598	-1.32523	-2.02205	-1.07855	-1.27952	-1.46004	-0.147685	2.48346		0.121634
Ppp1r9b	MGI:2387581	PPP1R9B	HGNC:9298	ENSMUSG00000038976	ENSG00000108819	1051	1872	2.26549	2.06872	1.55526	-1.36912	0.274882	0.668812	-0.14181	1.96316	4.30188		0.0330893
Ppp2r1a	MGI:1926334	PPP2R1A	HGNC:9302	ENSMUSG00000007564	ENSG00000105568	2153	1370	1.64061	1.98982	1.75987	0.798279	1.48068	2.65007	1.64301	1.79677	1.11246		0.793795
Ppp2r5e	MGI:1349473	PPP2R5E	HGNC:9313	ENSMUSG00000021051	ENSG00000154001	110	1099	0.70741	1.73546	1.21626	0.677875	1.70003	1.39282	1.25691	1.21971	0.974546		0.934304
Ppp3ca	MGI:107164	PPP3CA	HGNC:9314	ENSMUSG00000028161	ENSG00000138814	1271	421	1.73225	2.06668	1.52124	1.82443	2.0685	2.45486	2.11593	1.77339	0.788651		0.230953
Ppp3cb	MGI:107163	PPP3CB	HGNC:9315	ENSMUSG00000021816	ENSG00000107758	889	131	-4.96473	-2.20805	-3.37068	-1.02688	-0.367467	0.434693	-0.319885	-3.51449	0.109227		0.0241378
Praf2	MGI:1859607	PRAF2	HGNC:28911	ENSMUSG00000031149	ENSG00000102050	862	390	-1.46899	-1.74913	-1.6651	0.534139	0.400254	-0.763511	0.0569608	-1.62774	0.311068		0.0160225
Prdx1	MGI:99523	PRDX1	HGNC:9352	ENSMUSG00000028691	ENSG00000117450	60	427	-1.41584	-0.598912	-0.677382	1.33457	1.85124	-0.986142	0.733223	-0.897379	0.322953		0.147799
Prdx5	MGI:1859821	PRDX5	HGNC:9355	ENSMUSG00000024953	ENSG00000126432	792	667	-1.55998	-1.76435	-2.23642	-0.563237	-0.754568	-1.24841	-0.855404	-1.85358	0.500632		0.025115
Prkar1a	MGI:104878	PRKAR1A	HGNC:9388	ENSMUSG00000020612	ENSG00000108946	683	2286	2.93603	3.22085	3.00804	1.80785	0.969912	1.33599	1.37125	3.05497	3.21256	+	0.00281323
Prkar2a	MGI:108025	PRKAR2A	HGNC:9391	ENSMUSG00000032601	ENSG00000114302	1075	978	0.832967	1.57646	1.22974	-1.42375	0.18159	-0.846209	-0.696122	1.21305	3.75594		0.0208704
Prkar2b	MGI:97760	PRKAR2B	HGNC:9392	ENSMUSG00000002997	ENSG00000005249	2154	1097	3.63679	4.35421	4.36783	2.04763	3.01946	2.31753	2.46154	4.11961	3.15594		0.0117166
Prkcc	MGI:97597	PRKCG	HGNC:9402	ENSMUSG00000078816	ENSG00000126583	252	436	-1.34012	0.509759	-0.289143	-0.972228	1.08436	0.134893	0.0823426	-0.373167	0.729252		0.599569
Prkra	MGI:1344375	PRKRA	HGNC:9438	ENSMUSG00000002731	ENSG00000180228	662	2064	-4.41508	-5.26366	-3.29544	-0.2269	-0.985309	-1.47715	-0.896452	-4.32473	0.0928937		0.00712675
Prosapip1	MGI:2656976	NOT_FOUND	NOT_FOUND	ENSMUSG00000037703	ENSG00000088899	920	2174	-0.457176	-0.11576	-0.167995	-1.84186	-2.13482	-2.10397	-2.02688	-0.246977	3.43404	+	0.00022738
Prps1	MGI:97775	PRPS1	HGNC:9462	ENSMUSG00000031432	ENSG00000147224	1439	2400	-4.69739	-1.81292	-0.946809	-2.36925	-1.57153	-2.76569	-2.23549	-2.48571	0.84077		0.843334
Psmc1	MGI:106054	PSMC1	HGNC:9547	ENSMUSG00000021178	ENSG00000100764	392	814	-2.90689	-3.1969	-3.38876	-3.41182	-1.81336	-1.94154	-2.3889	-3.16418	0.584276		0.21847
Psmd11	MGI:1916327	PSMD11	HGNC:9556	ENSMUSG00000017428	ENSG00000108671	1129	1051	-3.31436	-3.43568	-6.37849	-2.09016	-1.7791	-1.62575	-1.83167	-4.37618	0.171407		0.0655863
Psmd14	MGI:1913284	PSMD14	HGNC:16889	ENSMUSG00000026914	ENSG00000115233	791	161	-2.27391	-4.63221	-3.92203	-0.89965	-0.942086	-1.80768	-1.21647	-3.60939	0.190397		0.0343651
Psmd2	MGI:1096584	PSMD2	HGNC:9559	ENSMUSG00000006998	ENSG00000175166	426	489	-1.46891	-2.79	-2.31108	-1.48922	-1.25742	-1.29434	-1.34699	-2.19	0.557481		0.0983934
Ptn	MGI:97804	PTN	HGNC:9630	ENSMUSG00000029838	ENSG00000105894	1958	547	-4.06162	-4.66374	-4.66479	-1.79461	-4.87197	-2.95895	-3.20851	-4.46338	0.419031		0.243978
Ptprd	MGI:97812	PTPRD	HGNC:9668	ENSMUSG00000028399	ENSG00000153707	1137	2000	1.19276	1.47483	1.39895	0.0436521	0.748856	0.311	0.367836	1.35551	1.98299		0.0112823
Ptprs	MGI:97815	PTPRS	HGNC:9681	ENSMUSG00000013236	ENSG00000105426	1789	1230	0.579893	0.204673	0.79387	-2.05141	-0.615257	-1.58239	-1.41635	0.526145	3.84371		0.0131068
Ptprz1	MGI:97816	PTPRZ1	HGNC:9685	ENSMUSG00000068748	ENSG00000106278	2263	2153	-2.56275	-3.29383	-1.86066	-1.08386	-0.39021	-0.848791	-0.774288	-2.57241	0.287548		0.0175547
Pura	MGI:103079	PURA	HGNC:9701	ENSMUSG00000043991	ENSG00000185129	754	312	4.89076	4.60011	4.79051	1.27497	1.38056	2.0419	1.56581	4.76046	9.15556	+	0.000232397
Pycrl	MGI:1913444	PYCRL	HGNC:25846	ENSMUSG00000022571	ENSG00000104524	2207	939	-1.66499	-1.14731	-1.38125	-0.951414	-2.33358	-1.69237	-1.65912	-1.39785	1.19854		0.57323
Qk	MGI:97837	QKI	HGNC:21100	ENSMUSG00000062078	ENSG00000112531	1874	701	-1.42355	-1.60564	-1.31333	-1.2714	-2.84715	-0.72932	-1.61596	-1.44751	1.12385		0.805651
Rab1	MGI:97842	RAB1A	HGNC:9758	ENSMUSG00000020149	ENSG00000138069	200	196	-2.20443	-1.92739	-2.11219	0.946543	0	0.139114	0.361886	-2.08134	0.183872	+	0.00133558
Rab14	MGI:1915615	RAB14	HGNC:16524	ENSMUSG00000026878	ENSG00000119396	1568	571	-1.24344	-1.55709	-1.53327	-1.055	-2.24145	-1.76408	-1.68684	-1.4446	1.18283		0.536928
Rab1b	MGI:1923558	RAB1B	HGNC:18370	ENSMUSG00000024870	ENSG00000174903	313	196	-2.00423	-0.639055	-2.01672	0.946543	0	0.139114	0.361886	-1.55333	0.265132		0.0244523
Rab3a	MGI:97843	RAB3A	HGNC:9777	ENSMUSG00000031840	ENSG00000105649	748	461	-3.63328	-0.967355	-2.3887	-0.391986	-4.25746	-2.58789	-2.41245	-2.32978	1.05897		0.954402
Rab3c	MGI:1914545	RAB3C	HGNC:30269	ENSMUSG00000021700	ENSG00000152932	1070	1437	-0.703249	-0.475286	-2.09012	-2.0338	-2.59634	-0.292482	-1.64088	-1.08955	1.46543		0.555321
Rab5a	MGI:105926	RAB5A	HGNC:9783	ENSMUSG00000017831	ENSG00000144566	749	767	-3.00046	-2.97612	-4.44959	-3.04099	-6.0552	-0.312937	-3.13638	-3.47539	0.790582		0.854061
Rab6b	MGI:107283	RAB6B	HGNC:14902	ENSMUSG00000032549	ENSG00000154917	750	1705	-3.2736	-2.26093	-3.84877	0.193121	-0.20243	-0.831266	-0.280192	-3.12777	0.138929		0.00669145
Rab7	MGI:105068	RAB7A	HGNC:9788	ENSMUSG00000079477	ENSG00000075785	539	1835	-1.24582	-2.18553	0.139235	-0.679091	-3.05134	-2.52954	-2.08666	-1.09737	1.98521		0.372844
Rac1	MGI:97845	RAC1	HGNC:9801	ENSMUSG00000001847	ENSG00000136238	363	599	5.4688	6.0918	6.27557	5.28561	5.869	4.29465	5.14975	5.94539	1.73585		0.200984
Rala	MGI:1927243	RALA	HGNC:9839	ENSMUSG00000008859	ENSG00000006451	1379	513	0.29434	0.304586	-0.99698	1.07857	0.294767	0.34691	0.573415	-0.132685	0.612975		0.23135
Ralgapb	MGI:2444531	RALGAPB	HGNC:29221	ENSMUSG00000027652	ENSG00000170471	1934	1840	-2.25543	-2.77611	-0.339489	-4.48947	-3.47056	-5.00845	-4.32283	-1.79034	5.78567		0.0433006
Rap1a	MGI:97852	RAP1A	HGNC:9855	ENSMUSG00000068798	ENSG00000116473	614	925	0.624637	0.428322	1.6908	1.60671	1.55087	0.0652564	1.07428	0.914587	0.895217		0.815037
Rap1gds1	MGI:2385189	RAP1GDS1	HGNC:9859	ENSMUSG00000028149	ENSG00000138698	2170	1377	-3.78482	-2.18155	-3.0921	-0.511482	-0.230611	1.10307	0.120326	-3.01949	0.113455		0.00994318
Rapgef2	MGI:2659071	RAPGEF2	HGNC:16854	ENSMUSG00000062232	ENSG00000109756	2355	2348	-1.64872	-1.39942	-1.50803	-1.89099	-1.14094	-1.05873	-1.36356	-1.51872	0.898027		0.602008
Rapgef4	MGI:1917723	RAPGEF4	HGNC:16626	ENSMUSG00000049044	ENSG00000091428	1779	1524	2.4013	2.4123	1.60349	-0.529723	-0.700844	0.582541	-0.216009	2.13903	5.11608		0.00820244
Rapgef6	MGI:2384761	RAPGEF6	HGNC:20655	ENSMUSG00000037533	ENSG00000158987	1566	2168	0.941717	-1.16139	0.228775	0.454736	-0.287237	2.11911	0.762203	0.0030348	0.590837		0.465509
Rasal2	MGI:2443881	RASAL2	HGNC:9874	ENSMUSG00000070565	ENSG00000075391	237	1807	-2.14285	-2.04766	-1.91995	-3.90457	-4.18599	-3.64946	-3.91334	-2.03682	3.67188	+	0.000364528
Rasgrf2	MGI:109137	RASGRF2	HGNC:9876	ENSMUSG00000021708	ENSG00000113319	771	37	-1.29031	-1.81437	-1.28645	-2.51764	-3.98596	-4.92391	-3.80917	-1.46371	5.08223		0.0313985
Rbx1	MGI:1891829	RBX1	HGNC:9928	ENSMUSG00000022400	ENSG00000100387	127	527	1.05007	-0.240211	-0.448546	0.0955123	0.957045	1.2589	0.770485	0.120437	0.637259		0.328111
Rdx	MGI:97887	RDX	HGNC:9944	ENSMUSG00000032050	ENSG00000137710	2398	2183	-1.87129	-3.993	-2.72368	-0.612414	-1.55419	-2.8301	-1.66557	-2.86266	0.436154		0.250011
Reps2	MGI:2663511	REPS2	HGNC:9963	ENSMUSG00000040855	ENSG00000169891	1850	1285	-4.02633	-3.71947	-4.44113	-3.42546	-1.62203	-2.9226	-2.6567	-4.06231	0.377458		0.0713698
Rgs7	MGI:1346089	RGS7	HGNC:10003	ENSMUSG00000026527	ENSG00000182901	912	320	1.44445	1.84072	1.54289	0.993254	0.628286	1.92753	1.18302	1.60935	1.34381		0.35167
Rhoa	MGI:1096342	RHOA	HGNC:667	ENSMUSG00000007815	ENSG00000067560	2105	1419	-0.670117	-1.12614	-1.07915	-0.206731	-0.809386	-2.15556	-1.05723	-0.958466	1.07085		0.876013
Rhob	MGI:107949	RHOB	HGNC:668	ENSMUSG00000054364	ENSG00000143878	34	1795	0.396783	-0.265137	-0.51546	-0.345512	-1.73466	-2.06962	-1.38326	-0.127938	2.38721		0.102036
Rhog	MGI:1928370	RHOG	HGNC:672	ENSMUSG00000073982	ENSG00000177105	568	259	1.04028	0.197866	0.0968337	1.09159	0.320976	0.442508	0.618359	0.444993	0.886771		0.674235
Rhot1	MGI:1926078	RHOT1	HGNC:21168	ENSMUSG00000017686	ENSG00000126858	2216	475	-0.734074	-0.169503	-0.409896	-0.660313	-0.554063	-1.61227	-0.942214	-0.437824	1.41852		0.248842
Rimbp2	MGI:2443235	RIMBP2	HGNC:30339	ENSMUSG00000029420	ENSG00000060709	1290	2325	0.646745	0.445611	0.292231	-2.14861	-2.08766	-3.11588	-2.45072	0.461529	7.5279	+	0.00112128
Rims1	MGI:2152971	RIMS1	HGNC:17282	ENSMUSG00000041670	ENSG00000079841	1823	2308	2.01201	1.32343	1.50213	-0.315357	-0.427133	0.267739	-0.158251	1.61252	3.41237	+	0.00403612
Rock2	MGI:107926	ROCK2	HGNC:10252	ENSMUSG00000020580	ENSG00000134318	1734	34	-1.50995	-1.11696	-1.68665	-3.16676	-1.99203	-2.12772	-2.42884	-1.43785	1.98755		0.0718101
Rph3a	MGI:102788	RPH3A	HGNC:17056	ENSMUSG00000029608	ENSG00000089169	1003	105	1.59943	2.28644	2.70405	2.41825	1.64544	2.42484	2.16285	2.19664	1.0237		0.938726
Rpl10a	MGI:1343877	RPL10A	HGNC:10299	ENSMUSG00000037805	ENSG00000198755	1962	2339	-0.768528	0.395014	-0.464566	0.823846	-0.209299	-0.056803	0.185915	-0.27936	0.724333		0.382254
Rpl11	MGI:1914275	RPL11	HGNC:10301	ENSMUSG00000059291	ENSG00000142676	1841	1602	-0.4537	0.0642609	0.107028	-2.01562	0.0350435	-2.75793	-1.5795	-0.0941372	2.79988		0.157134
Rpl12	MGI:98002	RPL12	HGNC:10302	ENSMUSG00000038900	ENSG00000172746	795	2338	2.90156	2.6298	2.05499	1.94884	1.52805	0.158411	1.21177	2.52878	2.4915		0.0913976
Rpl13	MGI:105922	RPL13	HGNC:10303	ENSMUSG00000000740	ENSG00000167526	2075	1094	0.304481	0.354504	0.31707	-0.328976	-1.29115	-2.19399	-1.27137	0.325352	3.02455		0.0413848
Rpl19	MGI:98020	RPL19	HGNC:10312	ENSMUSG00000017404	ENSG00000108298	812	449	0.218307	0.284939	-0.645768	-0.234921	-2.04729	-2.559	-1.61374	-0.0475076	2.9613		0.110398
Rpl23a	MGI:3040672	RPL23A	HGNC:10317	ENSMUSG00000058546	ENSG00000198242	667	1963	0.535494	-0.658185	0.805791	0.148976	-1.00219	-3.48301	-1.44541	0.2277	3.18901		0.223386
Rpl24	MGI:1915443	RPL24	HGNC:10325	ENSMUSG00000022601	ENSG00000114391	1727	1532	1.71448	1.23397	1.91402	-0.129667	-0.904459	-2.14548	-1.05987	1.62083	6.41165		0.012466
Rpl3	MGI:1351605	RPL3	HGNC:10332	ENSMUSG00000060036	ENSG00000100316	2133	1489	0.00488051	-0.660188	-0.265902	-1.33958	-2.36667	-2.79755	-2.16793	-0.30707	3.63224		0.0171148
Rpl30	MGI:98037	RPL30	HGNC:10333	ENSMUSG00000058600	ENSG00000156482	1417	1055	-2.03585	0.0573063	0.395392	-1.78587	-0.450963	-2.11996	-1.45227	-0.527716	1.89809		0.369665
Rpl35	MGI:1913739	RPL35	HGNC:10344	ENSMUSG00000062997	ENSG00000136942	1963	1282	1.96058	0.501453	1.23794	0.400446	0.73272	-0.387095	0.248691	1.23332	1.97881		0.140285
Rpl38	MGI:1914921	RPL38	HGNC:10349	ENSMUSG00000057322	ENSG00000172809	1320	923	0.690529	0.0601195	-0.859987	3.66498	2.94363	2.59072	3.06644	-0.0364459	0.116396	+	0.00486331
Rpl4	MGI:1915141	RPL4	HGNC:10353	ENSMUSG00000032399	ENSG00000174444	143	118	1.66012	2.53766	1.8802	1.41263	-0.950366	0.634784	0.365684	2.02599	3.16084		0.0893257
Rpl6	MGI:108057	RPL6	HGNC:10362	ENSMUSG00000029614	ENSG00000089009	1775	1401	1.12128	0.0507147	0.613515	-2.11882	-3.96962	-3.0977	-3.06205	0.595171	12.6163	+	0.00407266
Rpl7	MGI:98073	RPL7	HGNC:10363	ENSMUSG00000043716	ENSG00000214485	955	1381	1.0638	0.874976	-0.102713	-1.0116	-0.153622	-1.4543	-0.873176	0.612019	2.79955		0.0476002
Rpl7a	MGI:1353472	RPL7A	HGNC:10364	ENSMUSG00000062647	ENSG00000148303	1670	1557	2.93044	2.20799	1.6812	0	-0.0566574	-2.4161	-0.824253	2.27321	8.55911		0.023977
Rpl8	MGI:1350927	RPL8	HGNC:10368	ENSMUSG00000003970	ENSG00000161016	440	915	2.24875	2.00712	1.15295	0.65138	-0.595491	-1.0734	-0.339171	1.80294	4.41407		0.0249211
Rplp0	MGI:1927636	RPLP0	HGNC:10371	ENSMUSG00000067274	ENSG00000089157	307	1418	1.723	1.73321	1.6311	1.37212	0.604963	0.476447	0.817842	1.69577	1.83774		0.0355649
Rpn1	MGI:98084	RPN1	HGNC:10381	ENSMUSG00000030062	ENSG00000163902	828	1358	-0.836005	-0.586062	-0.761001	-1.68921	-2.43146	-2.62044	-2.24704	-0.727689	2.86662		0.00663677
Rps11	MGI:1351329	RPS11	HGNC:10384	ENSMUSG00000003429	ENSG00000142534	803	2290	2.75545	2.13266	0.88023	0.370707	-1.06416	-2.35799	-1.01715	1.92278	7.67373		0.0377818
Rps13	MGI:1915302	RPS13	HGNC:10386	ENSMUSG00000066362	ENSG00000110700	1496	562	0.9622	-0.577158	-0.581622	0.483965	-0.702157	-2.34936	-0.855851	-0.0655267	1.72946		0.4605
Rps14	MGI:98107	RPS14	HGNC:10387	ENSMUSG00000024608	ENSG00000164587	845	1510	2.23797	1.86432	1.7635	1.76535	1.57575	0.777351	1.37282	1.95526	1.49738		0.157434
Rps15a	MGI:2389091	RPS15A	HGNC:10389	ENSMUSG00000008683	ENSG00000134419	1497	1262	-0.603432	-0.77868	-0.868734	-1.46409	-1.98511	-3.01348	-2.15423	-0.750282	2.64624		0.0383989
Rps17	MGI:1309526	RPS17	HGNC:10397	ENSMUSG00000061787	ENSG00000184779	1499	2002	-0.719913	-1.13922	-0.872322	-0.434455	-1.63796	-1.73261	-1.26834	-0.910485	1.28152		0.457331
Rps18	MGI:98146	RPS18	HGNC:10401	ENSMUSG00000008668	ENSG00000182498	455	1446	1.27011	0.383418	0.131122	1.02822	0.25024	-0.499581	0.259626	0.594885	1.2616		0.581772
Rps19	MGI:1333780	RPS19	HGNC:10402	ENSMUSG00000040952	ENSG00000105372	1318	157	0.610297	-1.2247	-0.929412	-0.646307	-0.656847	-2.624	-1.30905	-0.514605	1.73441		0.412538
Rps25	MGI:1922867	RPS25	HGNC:10413	ENSMUSG00000009927	ENSG00000185641	439	238	0.334889	-0.325313	-0.496702	2.51874	1.50436	0.511058	1.51139	-0.162376	0.313435		0.0572286
Rps26	MGI:1351628	RPS26P8	HGNC:31329	ENSMUSG00000025362	ENSG00000204652	1925	1270	-0.833114	-1.40874	-0.820012	-0.821005	-1.42115	-3.03038	-1.75751	-1.02062	1.66658		0.34419
Rps27	MGI:1888676	RPS27	HGNC:10416	ENSMUSG00000050621	ENSG00000177954	1912	1001	-1.11149	-0.580761	-0.712732	0.634777	-3.82704	0.133778	-1.01949	-0.801663	1.16298		0.885524
Rps28	MGI:1859516	RPS28	HGNC:10418	ENSMUSG00000067288	NOT_FOUND	2233	914	1.6835	0.226781	0.277511	0.87237	0.00158533	0.534291	0.469416	0.729263	1.19735		0.65578
Rps3	MGI:1350917	RPS3	HGNC:10420	ENSMUSG00000030744	ENSG00000149273	396	838	2.12518	1.92312	1.03146	0.369136	0.690187	0.826243	0.628522	1.69325	2.09178		0.0424377
Rps3a	MGI:1202063	RPS3A	HGNC:10421	ENSMUSG00000028081	ENSG00000178429	1996	1598	0.20207	-0.135074	-0.682858	0.587101	-0.325628	-0.260033	0.000479967	-0.205287	0.867078		0.626537
Rps8	MGI:98166	RPS8	HGNC:10441	ENSMUSG00000047675	ENSG00000214310	1356	2011	1.78781	0.286814	-0.382495	-0.865214	-0.643406	-1.42761	-0.978743	0.564045	2.91357		0.0867257
Rras2	MGI:1914172	RRAS2	HGNC:17271	ENSMUSG00000055723	ENSG00000133818	432	1534	-1.11539	-1.05177	-1.92628	2.32891	1.1613	2.19406	1.89475	-1.36448	0.104442	+	0.00216304
Rtn4rl2	MGI:2669796	RTN4RL2	HGNC:23053	ENSMUSG00000050896	ENSG00000186907	1761	1689	-2.12277	-3.03667	-1.90319	-2.64716	-1.80366	-1.50922	-1.98668	-2.35421	0.77511		0.492073
Rufy3	MGI:106484	RUFY3	HGNC:30285	ENSMUSG00000029291	ENSG00000018189	1029	1911	-0.152089	0.425133	-0.867437	1.92657	1.4301	2.39811	1.91826	-0.198131	0.230623		0.0105432
Sacm1l	MGI:1933169	SACM1L	HGNC:17059	ENSMUSG00000025240	ENSG00000211456	706	62	-2.82256	-2.11425	-2.01855	-5.32413	-1.70521	-0.707933	-2.57909	-2.31845	1.19801		0.863783
Samm50	MGI:1915903	SAMM50	HGNC:24276	ENSMUSG00000022437	ENSG00000100347	1964	1024	-0.0733642	1.23913	0.977092	1.64681	2.02417	1.42406	1.69834	0.714284	0.505555		0.0877655
Sbf1	MGI:1925230	SBF1	HGNC:10542	ENSMUSG00000036529	ENSG00000100241	935	2250	-0.724158	-0.134446	-0.191115	-0.655673	-0.0035372	0.801762	0.0475173	-0.349906	0.759213		0.437676
Scai	MGI:2443716	SCAI	HGNC:26709	ENSMUSG00000035236	ENSG00000173611	1299	1406	1.8917	1.73761	1.91797	0.729424	0.655272	1.45077	0.945157	1.84909	1.87116		0.0253902
Scfd1	MGI:1924233	SCFD1	HGNC:20726	ENSMUSG00000020952	ENSG00000092108	1189	1092	-3.32618	-3.42952	-2.95101	-2.89953	-2.51785	-2.26811	-2.56183	-3.23557	0.626879		0.045149
Scrib	MGI:2145950	SCRIB	HGNC:30377	ENSMUSG00000022568	ENSG00000180900	1944	662	-4.96662	-3.81551	-4.90465	-3.60427	-3.13033	-2.47682	-3.07047	-4.56226	0.355572		0.0397707
Sdcbp	MGI:1337026	SDCBP	HGNC:10662	ENSMUSG00000028249	ENSG00000137575	1664	287	-1.76123	-1.85051	-2.29921	-0.0611286	-0.115709	-0.462827	-0.213222	-1.97032	0.295844	+	0.00108848
Sec22b	MGI:1338759	SEC22B	HGNC:10700	ENSMUSG00000027879	NOT_FOUND	238	186	0.294131	0.637223	0.674006	0.682089	-1.73303	0.464356	-0.195528	0.53512	1.65938		0.402339
Sec23a	MGI:1349635	SEC23A	HGNC:10701	ENSMUSG00000020986	ENSG00000100934	570	483	-2.50078	-1.84139	-1.95267	-2.5099	-0.138448	-1.68747	-1.44527	-2.09828	0.635954		0.41836
Sec24c	MGI:1919746	SEC24C	HGNC:10705	ENSMUSG00000039367	ENSG00000176986	782	1202	-1.70168	-1.95747	-1.95097	-3.32462	-2.00315	-2.02323	-2.45033	-1.87004	1.49515		0.2624
Sfn	MGI:1891831	SFN	HGNC:10773	ENSMUSG00000047281	ENSG00000175793	472	308	-0.279383	0.0751052	-0.0708519	1.6943	0.569256	0.834549	1.0327	-0.0917099	0.458689		0.0338818
Sfxn3	MGI:2137679	SFXN3	HGNC:16087	ENSMUSG00000025212	ENSG00000107819	2315	575	-0.240289	-0.448341	-1.2202	0.569541	-0.560003	-3.38952	-1.12666	-0.636276	1.40482		0.70706
Sfxn5	MGI:2137681	SFXN5	HGNC:16073	ENSMUSG00000033720	ENSG00000144040	1150	1023	-1.11072	-0.926066	-1.56316	-0.651112	-1.89676	-1.72311	-1.42366	-1.19998	1.16771		0.632736
Sgip1	MGI:1920344	SGIP1	HGNC:25412	ENSMUSG00000028524	ENSG00000118473	977	1997	-0.511727	-0.179929	-0.794962	-0.529843	-0.247219	0.320391	-0.152224	-0.495539	0.788228		0.325697
Sh3gl2	MGI:700009	SH3GL2	HGNC:10831	ENSMUSG00000028488	ENSG00000107295	609	1584	0.254346	0.793413	1.32276	2.88921	3.72513	4.65153	3.75529	0.790174	0.128059		0.00758467
Sh3pxd2a	MGI:1298393	SH3PXD2A	HGNC:23664	ENSMUSG00000053617	ENSG00000107957	1924	1329	-2.3625	-2.57727	-2.29616	-5.27758	-6.41118	-4.73733	-5.47536	-2.41198	8.35932	+	0.00360775
Shank2	MGI:2671987	SHANK2	HGNC:14295	ENSMUSG00000037541	ENSG00000162105	2357	1673	3.18845	2.77265	3.3766	-0.412293	0.432238	0.0807803	0.0335753	3.11256	8.45021	+	0.000528374
Shank3	MGI:1930016	SHANK3	HGNC:14294	ENSMUSG00000022623	ENSG00000099882	627	1677	4.52433	4.74373	4.25078	0.955114	2.21505	2.21129	1.79382	4.50628	6.5544	+	0.00360188
Shisa7	MGI:3605641	SHISA7	HGNC:35409	ENSMUSG00000053550	ENSG00000187902	2422	2377	1.99562	2.39267	2.15048	-2.08267	-0.353563	-1.42511	-1.28712	2.17959	11.0556	+	0.00257373
Sipa1l1	MGI:2443679	SIPA1L1	HGNC:20284	ENSMUSG00000042700	ENSG00000197555	2020	1898	0.427814	0.785039	0.692828	-4.03592	-2.2341	-1.56718	-2.6124	0.635227	9.49803		0.0120734
skt	MGI:98314	NOT_FOUND	NOT_FOUND	NOT_FOUND	ENSG00000120549	1118	1847	1.51786	1.44088	1.57856	-1.15007	-0.547493	-0.724362	-0.807307	1.51243	4.99242	+	0.000224035
Slc12a2	MGI:101924	SLC12A2	HGNC:10911	ENSMUSG00000024597	ENSG00000064651	720	856	-2.72152	-3.16042	-2.48347	-0.885501	-4.56327	-2.66819	-2.70565	-2.78847	0.944211		0.942568
Slc12a5	MGI:1862037	SLC12A5	HGNC:13818	ENSMUSG00000017740	ENSG00000124140	1680	1994	-0.823247	-1.31086	-1.34917	-2.04754	-2.70657	-1.83848	-2.19753	-1.16109	2.05116		0.029203
Slc17a7	MGI:1920211	SLC17A7	HGNC:16704	ENSMUSG00000070570	ENSG00000104888	813	58	1.56327	1.01532	0.957246	1.20156	1.37351	2.00474	1.5266	1.17861	0.785678		0.326191
Slc1a2	MGI:101931	SLC1A2	HGNC:10940	ENSMUSG00000005089	ENSG00000110436	1672	2058	1.99871	1.44206	0.700691	-0.287488	-0.45588	0.228444	-0.171641	1.38049	2.9325		0.0223363
Slc1a3	MGI:99917	SLC1A3	HGNC:10941	ENSMUSG00000005360	ENSG00000079215	513	182	3.402	3.04677	3.46862	1.73742	2.29597	1.34863	1.79401	3.3058	2.85163		0.0076813
Slc25a11	MGI:1915113	SLC25A11	HGNC:10981	ENSMUSG00000014606	ENSG00000108528	1447	1268	1.38963	0.777137	0.169737	1.34459	0.154769	-1.31866	0.0602317	0.778835	1.64559		0.443972
Slc25a12	MGI:1926080	SLC25A12	HGNC:10982	ENSMUSG00000027010	ENSG00000115840	1879	1348	2.42547	0.50536	0.553069	1.20359	0.504052	0.25556	0.654401	1.1613	1.42099		0.505054
Slc25a13	MGI:1354721	SLC25A13	HGNC:10983	ENSMUSG00000015112	ENSG00000004864	248	865	-2.29668	-2.17177	-5.71293	-0.640033	-2.46308	-2.65734	-1.92015	-3.39379	0.360072		0.328769
Slc25a22	MGI:1915517	SLC25A22	HGNC:19954	ENSMUSG00000019082	ENSG00000177542	114	64	2.70182	2.7295	2.6866	3.68251	2.39201	2.02115	2.69856	2.70597	1.00516		0.988954
Slc25a3	MGI:1353498	SLC25A3	HGNC:10989	ENSMUSG00000061904	ENSG00000075415	701	529	2.99186	2.98907	2.30242	3.52566	3.89429	3.59607	3.67201	2.76112	0.531857		0.0235277
Slc25a4	MGI:1353495	SLC25A4	HGNC:10990	ENSMUSG00000031633	ENSG00000151729	729	219	-0.786146	-2.63369	-4.73301	3.29374	2.64569	1.86346	2.60096	-2.71762	0.0250581		0.0118252
Slc25a5	MGI:1353496	SLC25A5	HGNC:10991	ENSMUSG00000016319	ENSG00000005022	257	608	4.12232	3.58425	2.33716	0.979434	-0.644825	-1.40341	-0.356267	3.34791	13.0337		0.0135674
Slc27a1	MGI:1347098	SLC27A1	HGNC:10995	ENSMUSG00000031808	ENSG00000130304	2034	378	-4.65276	-3.39187	-3.41896	-2.31835	-3.71951	-3.93355	-3.3238	-3.8212	0.708386		0.490137
Slc2a1	MGI:95755	SLC2A1	HGNC:11005	ENSMUSG00000028645	ENSG00000117394	1464	1354	1.80835	0.163072	1.45049	3.86459	0.469581	-0.0317838	1.43413	1.14064	0.815924		0.835166
Slc4a4	MGI:1927555	SLC4A4	HGNC:11030	ENSMUSG00000060961	ENSG00000080493	2414	2353	1.22575	-0.0590255	-0.174981	-3.46155	-1.93474	-2.26221	-2.55283	0.330582	7.37894		0.0111082
Slc8a2	MGI:107996	SLC8A2	HGNC:11069	ENSMUSG00000030376	ENSG00000118160	365	991	1.5638	1.04073	1.28642	-2.19562	-0.803233	-1.66161	-1.55349	1.29698	7.21233	+	0.00275203
Slc9a3r2	MGI:1890662	SLC9A3R2	HGNC:11076	ENSMUSG00000002504	ENSG00000065054	1868	1345	-3.33472	-2.85587	-1.99224	-0.234093	0.234638	0.221295	0.0739468	-2.72761	0.143433	+	0.00267054
Snap25	MGI:98331	SNAP25	HGNC:11132	ENSMUSG00000027273	ENSG00000132639	375	556	6.30434	5.7887	5.32938	5.76019	5.70785	6.26628	5.91144	5.80747	0.930472		0.770597
Snap91	MGI:109132	SNAP91	HGNC:14986	ENSMUSG00000033419	ENSG00000065609	230	446	1.7437	1.30366	1.08715	-0.172065	0.0535022	0.970845	0.284094	1.37817	2.13477		0.0519135
Snd1	MGI:1929266	SND1	HGNC:30646	ENSMUSG00000001424	ENSG00000197157	1139	470	1.69415	1.34328	1.62186	1.08661	-0.265268	0.655372	0.492237	1.5531	2.08617		0.0619786
Snx1	MGI:1928395	SNX1	HGNC:11172	ENSMUSG00000032382	ENSG00000028528	1291	2125	-0.265012	0.012683	0.293521	1.4054	2.2923	2.26108	1.98626	0.0137305	0.254806	+	0.0040384
Snx12	MGI:1919331	SNX12	HGNC:14976	ENSMUSG00000046032	ENSG00000147164	2022	2037	-2.95008	-3.38595	-4.92116	-1.02933	-0.972067	-2.0519	-1.3511	-3.7524	0.189294		0.0257101
Snx27	MGI:1923992	SNX27	HGNC:20073	ENSMUSG00000028136	ENSG00000143376	2177	116	-3.2939	-2.97359	-2.05141	-1.99549	-1.01972	-0.899525	-1.30491	-2.77297	0.361469		0.0448383
Sorbs1	MGI:700014	SORBS1	HGNC:14565	ENSMUSG00000025006	ENSG00000095637	251	2029	-0.338441	-0.193472	0.0171545	-1.09444	-0.601408	-0.441124	-0.712323	-0.171586	1.45472		0.0715677
Sorbs2	MGI:1924574	SORBS2	HGNC:24098	ENSMUSG00000031626	ENSG00000154556	2437	2217	1.00527	1.02703	1.03444	-1.58178	-0.431852	-1.26768	-1.09377	1.02224	4.33495	+	0.00351566
Specc1	MGI:2442356	SPECC1	HGNC:30615	ENSMUSG00000042331	ENSG00000128487	1554	1740	-0.902363	-1.76071	-1.30572	-2.74312	-3.00987	-2.31125	-2.68808	-1.32293	2.57603		0.0130983
Spna2	MGI:98386	SPTAN1	HGNC:11273	ENSMUSG00000057738	ENSG00000197694	2363	2270	7.61547	7.5836	7.65364	6.15539	7.2714	7.06918	6.83199	7.61757	1.72378		0.0843801
Spnb1	MGI:98387	SPTB	HGNC:11274	ENSMUSG00000021061	ENSG00000070182	1358	735	1.88892	2.22815	2.07433	3.96784	2.84441	2.80295	3.20506	2.0638	0.453361		0.0442599
Spnb2	MGI:98388	SPTBN1	HGNC:11275	ENSMUSG00000020315	ENSG00000115306	192	1469	7.39274	7.26479	7.40469	6.22499	7.44305	7.15136	6.9398	7.35407	1.33263		0.325444
Spnb3	MGI:1313261	SPTBN2	HGNC:11276	ENSMUSG00000067889	ENSG00000173898	436	832	5.21702	5.463	5.52859	1.61336	3.58123	2.60105	2.59855	5.40287	6.9853		0.00822486
Spnb4	MGI:1890574	SPTBN4	HGNC:14896	ENSMUSG00000078782	ENSG00000160460	603	1301	0.867012	0.843659	0.752492	0.454676	0.960532	0.287649	0.567619	0.821054	1.19204		0.284558
Src	MGI:98397	SRC	HGNC:11283	ENSMUSG00000027646	ENSG00000197122	1767	1059	2.2474	2.73576	2.93646	0.982309	1.55632	2.47162	1.67008	2.63987	1.95856		0.113184
Srcin1	MGI:1933179	SRCIN1	HGNC:29506	ENSMUSG00000038453	ENSG00000017373	1900	2389	5.44844	5.31879	5.02397	2.66945	2.45106	2.81882	2.64644	5.26373	6.13596	+	9.19799e-05
Srgap3	MGI:2152938	SRGAP3	HGNC:19744	ENSMUSG00000030257	ENSG00000196220	1389	1542	-4.31943	-3.58436	-1.47888	-3.32645	-3.02329	-2.62182	-2.99052	-3.12756	0.909383		0.883178
Srpr	MGI:1914648	SRPR	HGNC:11307	ENSMUSG00000032042	ENSG00000182934	1431	363	-2	-0.90909	-0.585543	-1.99116	-3.15016	-4.24775	-3.12969	-1.16488	3.90361		0.0653026
Srprb	MGI:102964	SRPRB	HGNC:24085	ENSMUSG00000032553	ENSG00000144867	1603	115	-0.983855	-0.622786	-1.13981	-0.265762	-1.15683	-1.23991	-0.887502	-0.915484	0.980792		0.939666
Ssr3	MGI:1914687	SSR3	HGNC:11325	ENSMUSG00000027828	ENSG00000114850	319	398	-0.133906	-0.350583	-1.3243	-0.950373	-0.612014	-3.52801	-1.6968	-0.602929	2.13446		0.33157
Strn	MGI:1333757	STRN	HGNC:11424	ENSMUSG00000024077	ENSG00000115808	498	1679	0.355549	0.0422898	0.0637626	-1.89084	-2.13071	-1.93341	-1.98498	0.153867	4.40411	+	6.87958e-05
Stub1	MGI:1891731	STUB1	HGNC:11427	ENSMUSG00000039615	ENSG00000103266	805	2067	-1.28563	-1.34994	-1.29575	-0.62571	-0.647488	-0.817295	-0.696831	-1.31044	0.65356	+	0.000652091
Stx12	MGI:1931027	STX12	HGNC:11430	ENSMUSG00000028879	ENSG00000117758	1772	119	-1.9081	-2.9638	-3.13862	-2.20069	-3.29564	-3.48141	-2.99258	-2.67017	1.25042		0.592085
Stx16	MGI:1923396	STX16	HGNC:11431	ENSMUSG00000027522	ENSG00000124222	738	1119	-2.63084	-3.1001	-2.88729	-4.76819	-5.73984	-3.76466	-4.75756	-2.87274	3.69307		0.0324121
Stx1a	MGI:109355	STX1A	HGNC:11433	ENSMUSG00000007207	ENSG00000106089	126	745	1.95707	2.6361	4.2525	2.08842	2.80218	3.29303	2.72788	2.94856	1.16528		0.787415
Stx1b	MGI:1930705	STX1B	HGNC:18539	ENSMUSG00000030806	ENSG00000099365	1945	154	3.75965	3.48131	2.88098	4.48913	4.31419	4.43084	4.41139	3.37398	0.487203		0.0171773
Stx6	MGI:1926235	STX6	HGNC:11441	ENSMUSG00000026470	ENSG00000135823	477	70	-1.62651	-1.45442	-2.66435	-3.09327	-2.7853	-2.16125	-2.67994	-1.91509	1.69919		0.176719
Stx7	MGI:1858210	STX7	HGNC:11442	ENSMUSG00000019998	ENSG00000079950	1539	1539	0.828989	0.797222	0.383336	1.03363	0.547715	0.0139833	0.531777	0.669849	1.10043		0.695062
Stxbp1	MGI:107363	STXBP1	HGNC:11444	ENSMUSG00000026797	ENSG00000136854	1098	1849	-2.84615	-2.33148	-2.83605	5.52615	6.18261	6.72212	6.14363	-2.67123	0.00222057	+	2.16216e-05
Stxbp5	MGI:1926058	STXBP5	HGNC:19665	ENSMUSG00000019790	ENSG00000164506	1232	2189	-1.76459	-1.32498	-1.86826	-1.15181	-1.31553	-1.37632	-1.28122	-1.65261	0.773038		0.10737
Sucla2	MGI:1306775	SUCLA2	HGNC:11448	ENSMUSG00000022110	ENSG00000136143	1369	1271	-2.14456	-1.59545	-0.564991	-0.651958	-1.4939	-0.595465	-0.913773	-1.435	0.696778		0.394284
Suclg1	MGI:1927234	SUCLG1	HGNC:11449	ENSMUSG00000052738	ENSG00000163541	2368	1812	-3.1407	-1.35693	-2.51891	0.939541	-1.01205	-1.59853	-0.557012	-2.33885	0.290813		0.127367
Sv2a	MGI:1927139	SV2A	HGNC:20566	ENSMUSG00000038486	ENSG00000159164	2194	1998	-0.287478	0.206687	0.0799662	-1.02705	-0.787268	-4.39568	-2.07	-0.000275147	4.19807		0.152764
Syn1	MGI:98460	SYN1	HGNC:11494	ENSMUSG00000037217	ENSG00000008056	1677	2173	7.41394	7.42422	7.32625	6.00369	7.35516	6.82411	6.72765	7.38814	1.58061		0.169255
Syn2	MGI:103020	SYN2	HGNC:11495	ENSMUSG00000009394	ENSG00000157152	742	2052	3.96744	3.88369	3.31072	1.68956	3.57423	3.73562	2.9998	3.72062	1.64812		0.354179
Syn3	MGI:1351334	SYN3	HGNC:11496	ENSMUSG00000059602	ENSG00000185666	1655	1981	-1.43662	-1.35273	-1.59572	-0.936513	-0.016387	0.211598	-0.247101	-1.46169	0.430896		0.0274839
Syncrip	MGI:1891690	SYNCRIP	HGNC:16918	ENSMUSG00000032423	ENSG00000135316	1928	1810	-1.3238	-0.737466	-0.511708	-2.0252	-2.5693	-2.01101	-2.20184	-0.857656	2.53886		0.0114806
Syne1	MGI:1927152	SYNE1	HGNC:17089	ENSMUSG00000019769	ENSG00000131018	1517	1794	-7.90461	-7.23217	-9.38146	-9.32826	-8.08743	-8.8183	-8.74466	-8.17275	1.4865		0.477034
Syngap1	MGI:3039785	SYNGAP1	HGNC:11497	ENSMUSG00000067629	ENSG00000197283	1258	2202	5.82166	6.0726	6.0509	3.02709	3.60513	3.63819	3.42347	5.98172	5.88992	+	0.000280792
Synj1	MGI:1354961	SYNJ1	HGNC:11503	ENSMUSG00000022973	ENSG00000159082	1797	2379	-1.10246	-0.703552	-1.10472	-0.481853	-0.676441	-0.114106	-0.424133	-0.970246	0.684863		0.0616285
Synpo	MGI:1099446	SYNPO	HGNC:30672	ENSMUSG00000043079	ENSG00000171992	1966	1850	3.49645	3.03374	4.26046	2.99035	3.74139	2.70345	3.14507	3.59688	1.36776		0.393518
Syp	MGI:98467	SYP	HGNC:11506	ENSMUSG00000031144	ENSG00000102003	888	2265	-0.0684994	-0.666782	-0.529132	-0.421084	-1.94547	-0.176973	-0.847842	-0.421471	1.34385		0.504518
Syt1	MGI:99667	SYT1	HGNC:11509	ENSMUSG00000035864	ENSG00000067715	328	673	4.0548	4.32696	4.34503	1.98004	2.96371	3.97534	2.97303	4.24226	2.41033		0.0952989
Syt7	MGI:1859545	SYT7	HGNC:11514	ENSMUSG00000024743	ENSG00000011347	446	1198	2.81317	2.57583	2.33303	1.08059	1.35401	1.39089	1.27516	2.57401	2.46032	+	0.00156513
Tagln3	MGI:1926784	TAGLN3	HGNC:29868	ENSMUSG00000022658	ENSG00000144834	208	643	2.12279	1.72096	1.50468	2.62186	3.34183	1.68664	2.55011	1.78281	0.587515		0.208505
Taok1	MGI:1914490	TAOK1	HGNC:29259	ENSMUSG00000017291	ENSG00000160551	89	588	-1.60737	-2.57769	-2.33661	-1.31783	-1.79989	-1.24851	-1.45541	-2.17389	0.607738		0.101648
Taok2	MGI:1915919	TAOK2	HGNC:16835	ENSMUSG00000059981	ENSG00000149930	220	1866	-0.283104	-1.17742	-0.532554	-1.73026	-2.40717	-2.29565	-2.14436	-0.66436	2.78948		0.0120039
Tbc1d24	MGI:2443456	TBC1D24	HGNC:29203	ENSMUSG00000036473	ENSG00000162065	1633	1907	-1.11958	0.060702	-0.101503	-0.627116	-0.432864	0.813118	-0.0822875	-0.386793	0.80972		0.62911
Tcp1	MGI:98535	TCP1	HGNC:11655	ENSMUSG00000068039	ENSG00000120438	1547	1946	0.697289	1.05868	1.7179	1.98821	1.00798	1.87282	1.623	1.15796	0.724448		0.340367
Tjp1	MGI:98759	TJP1	HGNC:11827	ENSMUSG00000030516	ENSG00000104067	1342	2417	-0.623865	-0.45896	-0.467807	-1.46135	-0.632456	-1.36106	-1.15162	-0.516877	1.55266		0.0759355
Tjp2	MGI:1341872	TJP2	HGNC:11828	ENSMUSG00000024812	ENSG00000119139	137	1520	-3.12333	-3.63097	-3.44661	-2.3534	-3.3202	-2.63382	-2.76914	-3.4003	0.645655		0.122584
Tln2	MGI:1917799	TLN2	HGNC:15447	ENSMUSG00000052698	ENSG00000171914	1423	1208	-1.4503	-4.59188	-2.76594	-0.184909	1.33636	0.616901	0.589451	-2.93604	0.0868401		0.0252123
Tmod1	MGI:98775	TMOD1	HGNC:11871	ENSMUSG00000028328	ENSG00000136842	95	2187	2.02604	2.02171	2.77996	3.79874	2.41471	1.1861	2.46652	2.27591	0.876234		0.822434
Tmod2	MGI:1355335	TMOD2	HGNC:11872	ENSMUSG00000032186	ENSG00000128872	175	1784	4.50497	4.34263	4.22049	4.02172	4.12328	4.51268	4.21923	4.35603	1.09947		0.468064
Tnr	MGI:99516	TNR	HGNC:11953	ENSMUSG00000015829	ENSG00000116147	1176	1146	2.28267	1.27803	1.79293	1.77458	1.89683	1.58031	1.75057	1.78454	1.02383		0.9165
Tollip	MGI:1891808	TOLLIP	HGNC:16476	ENSMUSG00000025139	ENSG00000078902	1105	887	-3.7071	-4.16514	-4.62117	-2.80737	-2.61716	-2.35473	-2.59309	-4.16447	0.336485	+	0.00595625
Tom1l2	MGI:2443306	TOM1L2	HGNC:11984	ENSMUSG00000000538	ENSG00000175662	2038	1503	-3.91347	-3.45451	-3.73956	-1.34704	-2.3006	-0.551017	-1.39955	-3.70251	0.202647		0.0116711
Tomm20	MGI:1915202	TOMM20	HGNC:20947	ENSMUSG00000058779	ENSG00000173726	554	393	0.511959	-0.281179	1.01844	1.47152	0.958381	0.112781	0.84756	0.416405	0.741668		0.475166
Tomm70a	MGI:106295	TOMM70A	HGNC:11985	ENSMUSG00000022752	ENSG00000154174	517	2241	1.7407	1.39365	1.17873	2.09658	2.19441	1.51017	1.93372	1.4377	0.70906		0.139141
Tpi1	MGI:98797	TPI1	HGNC:12009	ENSMUSG00000023456	ENSG00000111669	2062	2026	-2.91745	-0.891682	-3.08213	0.292478	-0.318849	0.117534	0.0303876	-2.29708	0.199233		0.0329079
Tpm3	MGI:1890149	TPM3	HGNC:12012	ENSMUSG00000027940	ENSG00000143549	1393	1228	1.2765	0.187831	-0.807798	0.858753	1.48522	0.0377323	0.793902	0.218845	0.67126		0.47683
Tppp	MGI:1920198	TPPP	HGNC:24164	ENSMUSG00000021573	ENSG00000171368	450	340	-1.5955	-0.963831	-1.30274	1.15942	0.512972	1.40391	1.02543	-1.28736	0.201271	+	0.00199962
Trap1	MGI:1915265	TRAP1	HGNC:16264	ENSMUSG00000005981	ENSG00000126602	956	781	-5.65548	-4.33323	-4.99211	-2.37096	-2.62826	-2.30563	-2.43495	-4.99361	0.169733	+	0.00290533
Trappc3	MGI:1351486	TRAPPC3	HGNC:19942	ENSMUSG00000028847	ENSG00000054116	151	209	0.905157	0.14588	-0.904918	0.0794906	3.4754	-0.54645	1.00281	0.0487063	0.516161		0.520226
Trappc9	MGI:1923760	TRAPPC9	HGNC:30832	ENSMUSG00000047921	ENSG00000167632	1281	1917	-3.07917	-3.14675	-2.62645	-2.89696	-4.16716	-3.23748	-3.43387	-2.95079	1.39772		0.30732
Trim3	MGI:1860040	TRIM3	HGNC:10064	ENSMUSG00000036989	ENSG00000110171	1147	645	-2.00144	-1.20521	-1.47699	-0.773147	-0.216251	-1.19962	-0.729672	-1.56121	0.561929		0.0869075
Trio	MGI:1927230	TRIO	HGNC:12303	ENSMUSG00000022263	ENSG00000038382	2111	2108	-2.25826	-1.1874	-0.938613	-4.2118	-2.81554	-2.72436	-3.25057	-1.46142	3.4561		0.0466474
Tsc22d4	MGI:1926079	TSC22D4	HGNC:21696	ENSMUSG00000029723	ENSG00000166925	2353	2356	-4.19125	-7.5723	-5.77847	-2.28803	-3.80563	-3.67338	-3.25568	-5.84734	0.165895		0.0762861
Tsg101	MGI:106581	TSG101	HGNC:15971	ENSMUSG00000014402	ENSG00000074319	597	299	-1.60901	-1.9202	-1.99004	-2.11374	-1.3438	-1.15289	-1.53681	-1.83975	0.810597		0.392245
Ttc35	MGI:1913986	TTC35	HGNC:28963	ENSMUSG00000022337	ENSG00000104412	483	818	-0.148092	0.0125591	-0.356457	-0.00718351	-0.928409	-1.01433	-0.649975	-0.163997	1.40054		0.225656
Tuba1a	MGI:98869	TUBA1A	HGNC:20766	ENSMUSG00000072235	ENSG00000167552	1277	97	1.63706	2.53362	2.82658	1.48642	3.6263	-1.3088	1.26797	2.33242	2.09137		0.509879
Tuba4a	MGI:1095410	TUBA4A	HGNC:12407	ENSMUSG00000026202	ENSG00000127824	277	285	5.22013	5.80784	5.38418	6.28289	6.46081	6.73271	6.49214	5.47072	0.49263		0.00949195
Tubb2a	MGI:107861	TUBB2A	HGNC:12412	ENSMUSG00000058672	ENSG00000137267	462	1631	7.33749	7.70391	7.26428	8.51319	8.0868	8.57858	8.39285	7.43523	0.514903		0.00960467
Tubb2b	MGI:1920960	TUBB2B	HGNC:30829	ENSMUSG00000045136	ENSG00000137285	982	51	1.9226	2.00574	1.35076	2.69071	2.88425	2.21047	2.59514	1.7597	0.560412		0.0437374
Tubb2c	MGI:1915472	TUBB2C	HGNC:20771	ENSMUSG00000036752	ENSG00000188229	278	971	8.57461	8.88287	8.43398	9.75398	9.70645	9.572	9.67747	8.63049	0.483978	+	0.0018675
Tubb3	MGI:107813	TUBB3	HGNC:20772	ENSMUSG00000062380	ENSG00000198211	466	130	4.72135	4.9523	4.32722	5.03239	4.96884	4.41417	4.80514	4.66696	0.908664		0.63338
Tubb4	MGI:107848	TUBB4	HGNC:20774	ENSMUSG00000062591	ENSG00000104833	466	130	4.72135	4.9523	4.32722	5.03239	4.96884	4.41417	4.80514	4.66696	0.908664		0.63338
Tufm	MGI:1923686	TUFM	HGNC:12420	ENSMUSG00000073838	ENSG00000178952	864	1315	0.494167	0.252235	0.218439	3.06406	1.99614	2.8531	2.63777	0.321614	0.200802	+	0.00237108
Twf1	MGI:1100520	TWF1	HGNC:9620	ENSMUSG00000022451	ENSG00000151239	2328	1417	-1.1766	-1.68166	-1.03847	-1.68681	-1.17609	-2.2777	-1.71353	-1.29891	1.33295		0.329224
Uba1	MGI:98890	UBA1	HGNC:12469	ENSMUSG00000001924	ENSG00000130985	2198	481	-2.03701	-1.66905	-2.97289	1.2358	1.7507	2.51404	1.83351	-2.22632	0.059961	+	0.00164195
Ubc	MGI:98889	UBC	HGNC:12468	ENSMUSG00000008348	ENSG00000150991	1270	928	2.75032	2.52222	2.24166	3.26244	2.99221	2.79944	3.01803	2.50473	0.70062		0.0615096
Ube2n	MGI:1934835	UBE2N	HGNC:12492	ENSMUSG00000074781	ENSG00000102069	147	968	-1.71134	-0.378671	-1.30143	1.805	1.88965	1.35625	1.68363	-1.13048	0.142189	+	0.00275577
Ube2v2	MGI:1917870	UBE2V2	HGNC:12495	ENSMUSG00000022674	ENSG00000169139	622	1782	-0.19738	0.273129	-0.657124	3.33824	2.91799	3.54994	3.26872	-0.193791	0.0907151	+	0.000447538
Uchl1	MGI:103149	UCHL1	HGNC:12513	ENSMUSG00000029223	ENSG00000154277	595	1409	-1.66299	-1.25091	-1.85886	3.42301	0.853833	3.47409	2.58364	-1.59092	0.0553772		0.00913359
Unc13a	MGI:3051532	UNC13A	HGNC:23150	ENSMUSG00000074246	ENSG00000130477	1186	1801	0.715267	0.9494	0.446443	-1.51361	-1.05547	-1.25514	-1.27474	0.703704	3.94068	+	0.000549787
Uqcrc1	MGI:107876	UQCRC1	HGNC:12585	ENSMUSG00000025651	ENSG00000010256	470	124	1.90416	1.81444	1.51912	2.45822	2.77133	1.36908	2.19955	1.74591	0.730199		0.361369
Uqcrc2	MGI:1914253	UQCRC2	HGNC:12586	ENSMUSG00000030884	ENSG00000140740	1715	345	-0.320498	-1.50388	-0.707547	1.06422	0.94586	1.33868	1.11625	-0.843976	0.256988	+	0.00593619
Uqcrfs1	MGI:1913944	UQCRFS1	HGNC:12587	ENSMUSG00000038462	ENSG00000169021	861	808	-2.19509	-2.54771	-5.59834	-3.71947	-5.39301	-2.12432	-3.7456	-3.44705	1.22991		0.845306
Vamp2	MGI:1313277	VAMP2	HGNC:12643	ENSMUSG00000020894	ENSG00000179036	2145	1210	4.74495	4.06136	3.58127	2.47969	3.48869	2.6693	2.87923	4.12919	2.37835		0.0525189
Vapa	MGI:1353561	VAPA	HGNC:12648	ENSMUSG00000024091	ENSG00000101558	1220	548	1.12695	1.04584	0.48483	0.217372	0.90031	0.150792	0.422824	0.885875	1.37845		0.213424
Vapb	MGI:1928744	VAPB	HGNC:12649	ENSMUSG00000054455	ENSG00000124164	216	866	1.67534	1.76951	1.16653	1.1997	1.04807	0.995478	1.08108	1.53712	1.37177		0.0816268
Vcan	MGI:102889	VCAN	HGNC:2464	ENSMUSG00000021614	ENSG00000038427	344	403	0.432588	0.9935	-0.44984	4.17471	-1.38275	3.26077	2.01758	0.325416	0.309463		0.393453
Vcp	MGI:99919	VCP	HGNC:12666	ENSMUSG00000028452	ENSG00000165280	724	2124	1.16612	-0.177361	0.96524	0.669123	1.0542	-0.613622	0.369899	0.651332	1.2154		0.68964
Vdac1	MGI:106919	VDAC1	HGNC:12669	ENSMUSG00000020402	ENSG00000213585	1346	1258	5.3116	5.16225	4.15558	5.70718	5.40911	4.30855	5.14162	4.87648	0.832118		0.660111
Vdac2	MGI:106915	VDAC2	HGNC:12672	ENSMUSG00000021771	ENSG00000165637	1331	453	3.51738	3.95651	3.48886	5.44537	5.10529	4.20828	4.91965	3.65425	0.415985		0.0337652
Vdac3	MGI:106922	VDAC3	HGNC:12674	ENSMUSG00000008892	ENSG00000078668	993	454	1.70658	1.37035	0.631173	-0.807024	1.60126	0.217272	0.33717	1.23603	1.8646		0.306091
Vim	MGI:98932	VIM	HGNC:12692	ENSMUSG00000026728	ENSG00000026025	1987	1156	-0.116088	0.131517	-0.0191886	5.17737	6.27498	5.29531	5.58255	-0.00125329	0.0208501	+	9.57191e-05
Vps11	MGI:1918982	VPS11	HGNC:14583	ENSMUSG00000032127	ENSG00000160695	2429	1213	-2.77847	-3.19252	-1.11268	-1.51645	-2.74802	-2.30117	-2.18854	-2.36122	0.887195		0.824738
Vps16	MGI:2136772	VPS16	HGNC:14584	ENSMUSG00000027411	ENSG00000215305	1717	399	-1.10916	-1.1696	0	-1.21426	-1.95025	-3.82468	-2.32973	-0.759588	2.96934		0.143714
Vps33a	MGI:1924823	VPS33A	HGNC:18179	ENSMUSG00000029434	ENSG00000139719	1092	848	-2.8806	-2.27583	-2.6772	-1.98984	-2.6684	-2.0367	-2.23165	-2.61121	0.768671		0.249324
Vps35	MGI:1890467	VPS35	HGNC:13487	ENSMUSG00000031696	ENSG00000069329	606	108	-2.83637	-3.17411	-2.18813	-1.27681	0.0503029	-1.18803	-0.804847	-2.73287	0.262789		0.0202952
Vps39	MGI:2443189	VPS39	HGNC:20593	ENSMUSG00000027291	ENSG00000166887	1748	955	-0.0947742	-0.352612	0.135954	0.392895	-0.812092	-1.27788	-0.565692	-0.103811	1.37734		0.42248
Vps45	MGI:891965	VPS45	HGNC:14579	ENSMUSG00000015747	ENSG00000136631	1100	516	-2.31878	-2.14593	-2.31125	1.4498	2.69547	2.0856	2.07696	-2.25865	0.049528	+	0.000284641
Vps52	MGI:1330304	VPS52	HGNC:10518	ENSMUSG00000024319	ENSG00000112478	1195	2131	-2.29421	-2.44793	-2.63939	-2.05787	-0.603137	-1.05812	-1.23971	-2.46051	0.429043		0.0504515
Vsnl1	MGI:1349453	VSNL1	HGNC:12722	ENSMUSG00000054459	ENSG00000163032	1347	1252	-2.01958	-2.27825	-1.61947	0.626456	2.01877	0.731758	1.12566	-1.97243	0.116783	+	0.00312714
Wasf1	MGI:1890563	WASF1	HGNC:12732	ENSMUSG00000019831	ENSG00000112290	694	2068	2.54798	2.77539	2.53164	0.816974	2.51343	2.35867	1.89636	2.61833	1.64944		0.257505
Wasf2	MGI:1098641	WASF2	HGNC:12733	ENSMUSG00000028868	ENSG00000158195	2093	1029	-3.82397	-2.9473	-2.46798	-1.66957	-1.39661	-1.8827	-1.64963	-3.07975	0.3711		0.0273923
Wasf3	MGI:2658986	WASF3	HGNC:12734	ENSMUSG00000029636	ENSG00000132970	1659	627	-1.75175	-1.3982	-1.89389	-2.0969	-0.694202	-1.51042	-1.43384	-1.68128	0.84239		0.597946
Wasl	MGI:1920428	WASL	HGNC:12735	ENSMUSG00000029684	ENSG00000106299	412	2038	-2.18459	-2.2524	-2.58269	-1.28385	-1.7173	-0.351611	-1.11759	-2.33989	0.428598		0.0440486
Wdr37	MGI:1920393	WDR37	HGNC:31406	ENSMUSG00000021147	ENSG00000047056	1002	1749	-1.45707	-0.234461	0.457739	-0.956147	-1.31768	-0.501372	-0.925067	-0.411264	1.42781		0.445351
Wdr47	MGI:2139593	WDR47	HGNC:29141	ENSMUSG00000040389	ENSG00000215718	1383	1549	-0.354011	-1.2121	-0.745336	-1.98856	-0.612322	-0.760219	-1.12037	-0.770483	1.27446		0.524025
Wdr48	MGI:1914811	WDR48	HGNC:30914	ENSMUSG00000032512	ENSG00000114742	2228	1619	-1.10473	0.320713	-1.71347	-3.10068	-2.09355	-4.30581	-3.16668	-0.832496	5.04267		0.0566192
Wdr7	MGI:1860197	WDR7	HGNC:13490	ENSMUSG00000040560	ENSG00000091157	1764	391	-0.352565	-0.59521	-0.517008	-1.22023	-0.622454	-0.579361	-0.807347	-0.488261	1.24754		0.218542
Wipf2	MGI:1924462	WIPF2	HGNC:30923	ENSMUSG00000038013	ENSG00000171475	2021	1709	-3.4588	-3.77229	-4.07957	-2.41858	-3.53716	-1.42342	-2.45972	-3.77022	0.40318		0.108501
Yars	MGI:2147627	YARS	HGNC:12840	ENSMUSG00000028811	ENSG00000134684	247	1411	-3.54057	-4.18863	-4.51379	-2.84604	-3.55262	-2.04936	-2.81601	-4.081	0.416102		0.0717622
Yes1	MGI:99147	YES1	HGNC:12841	ENSMUSG00000014932	ENSG00000176105	482	76	-0.334883	0.318709	0.248373	-1.9494	-1.84011	-1.27972	-1.68974	0.0773993	3.40379	+	0.00381608
Ywhab	MGI:1891917	YWHAB	HGNC:12849	ENSMUSG00000018326	ENSG00000166913	1348	1263	1.91266	1.63458	1.14746	2.12049	2.28652	2.17923	2.19541	1.5649	0.645947		0.0511023
Ywhae	MGI:894689	YWHAE	HGNC:12851	ENSMUSG00000020849	ENSG00000108953	54	310	3.8272	4.06414	3.4587	4.10455	4.36784	2.6314	3.70126	3.78335	1.05855		0.892137
Ywhag	MGI:108109	YWHAG	HGNC:12852	ENSMUSG00000051391	ENSG00000170027	1483	1264	4.57676	4.58291	3.87107	5.42324	4.63474	4.86496	4.97432	4.34358	0.645847		0.130781
Ywhah	MGI:109194	YWHAH	HGNC:12853	ENSMUSG00000018965	ENSG00000128245	1349	1160	2.63225	2.44518	2.31129	3.2873	3.4377	3.73495	3.48665	2.46291	0.491838	+	0.00314426
Ywhaq	MGI:891963	YWHAQ	HGNC:12854	ENSMUSG00000076432	ENSG00000134308	584	1831	1.51552	1.85333	1.27467	2.64423	1.92725	2.171	2.24749	1.54784	0.61572		0.060108
Ywhaz	MGI:109484	YWHAZ	HGNC:12855	ENSMUSG00000022285	ENSG00000164924	666	257	3.63119	3.96294	3.34431	4.64992	3.87102	3.65738	4.05944	3.64615	0.750907		0.303797

## Sheet: Enriched in human
Appr Gene (m)	MGI ID	Appr Gene (h)	HGNC ID	Ensembl (m)	Ensembl (h)	human ibaq protein group id	mouse ibaq protein group id	iBAQ mPSD01 (Log2, normalised)	iBAQ mPSD02 (Log2, normalised)	iBAQ mPSD03 (Log2, normalised)	iBAQ hPSD01 (Log2, normalised)	iBAQ hPSD02 (Log2, normalised)	iBAQ hPSD03 (Log2, normalised)	iBAQ hPSD average (Log2, normalised)	iBAQ mPSD average (Log2, normalised)	Average fold change (mPSD from hDB/hPSD from mDB)	t-test Significant (Permutation 0.01)	t-test p value
Stxbp1	MGI:107363	STXBP1	HGNC:11444	ENSMUSG00000026797	ENSG00000136854	1098	1849	-2.84615	-2.33148	-2.83605	5.52615	6.18261	6.72212	6.14363	-2.67123	0.00222057	+	2.16216e-05
Vim	MGI:98932	VIM	HGNC:12692	ENSMUSG00000026728	ENSG00000026025	1987	1156	-0.116088	0.131517	-0.0191886	5.17737	6.27498	5.29531	5.58255	-0.00125329	0.0208501	+	9.57191e-05
Gdi1	MGI:99846	GDI1	HGNC:4226	ENSMUSG00000015291	ENSG00000203879	357	1518	-2.36987	-0.36342	-2.28992	3.48607	3.79421	4.0544	3.77823	-1.6744	0.0228347	+	0.00128423
Gfap	MGI:95697	GFAP	HGNC:4235	ENSMUSG00000020932	ENSG00000131095	818	272	1.69499	1.63394	1.82279	6.28034	7.51616	6.86283	6.88644	1.71724	0.0277917	+	0.000138583
Ppia	MGI:97749	PPIA	HGNC:9253	ENSMUSG00000071866	ENSG00000196262	1994	2096	-1.7948	-3.1069	-2.89348	2.08501	3.05348	2.37512	2.50454	-2.59839	0.0290981	+	0.000509666
Dpysl3	MGI:1349762	DPYSL3	HGNC:3015	ENSMUSG00000024501	ENSG00000113657	2369	443	-4.08305	-3.28343	-4.5679	0.936688	0.550967	1.46419	0.983948	-3.97812	0.0320825	+	0.000413841
Msn	MGI:97167	MSN	HGNC:7373	ENSMUSG00000031207	ENSG00000147065	1426	91	-2.3383	-2.13309	-2.721	2.05033	2.76073	2.12047	2.31051	-2.39746	0.0382612	+	7.77625e-05
Ldhb	MGI:96763	LDHB	HGNC:6541	ENSMUSG00000030246	ENSG00000111716	1420	1203	-2.64783	-2.2985	-3.63595	2.52163	1.67559	1.18391	1.79371	-2.86076	0.0397067	+	0.00114044
Hspa1a	MGI:96244	HSPA1A	HGNC:5232	ENSMUSG00000067283	ENSG00000204389	1712	1666	-1.91134	-2.75847	-1.29669	2.44718	2.93366	2.2091	2.52998	-1.98883	0.0436217	+	0.000678096
Hspa1b	MGI:99517	HSPA1B	HGNC:5233	ENSMUSG00000067284	ENSG00000204388	1712	1666	-1.91134	-2.75847	-1.29669	2.44718	2.93366	2.2091	2.52998	-1.98883	0.0436217	+	0.000678096
Glipr2	MGI:1917770	GLIPR2	HGNC:18007	ENSMUSG00000028480	ENSG00000122694	245	1853	-0.304441	-0.957433	-2.34673	3.45241	3.10061	3.0916	3.21487	-1.20287	0.0467873	+	0.00197485
Mapre2	MGI:106271	MAPRE2	HGNC:6891	ENSMUSG00000024277	ENSG00000166974	2418	2383	-4.58256	-2.72572	-3.02446	0.960871	0.353392	1.59142	0.96856	-3.44424	0.0469476	+	0.00286934
Vps45	MGI:891965	VPS45	HGNC:14579	ENSMUSG00000015747	ENSG00000136631	1100	516	-2.31878	-2.14593	-2.31125	1.4498	2.69547	2.0856	2.07696	-2.25865	0.049528	+	0.000284641
Eno2	MGI:95394	ENO2	HGNC:3353	ENSMUSG00000004267	ENSG00000111674	1339	1617	-1.49918	-3.18218	-2.38994	2.52076	1.47706	1.81703	1.93828	-2.3571	0.0509285	+	0.00171781
Aco2	MGI:87880	ACO2	HGNC:118	ENSMUSG00000022477	ENSG00000100412	582	240	-2.41684	-1.37017	-2.37179	1.86183	2.76029	1.61324	2.07845	-2.05293	0.0570596	+	0.00106632
Uba1	MGI:98890	UBA1	HGNC:12469	ENSMUSG00000001924	ENSG00000130985	2198	481	-2.03701	-1.66905	-2.97289	1.2358	1.7507	2.51404	1.83351	-2.22632	0.059961	+	0.00164195
Fscn1	MGI:1352745	FSCN1	HGNC:11148	ENSMUSG00000029581	ENSG00000075618	1180	1682	-2.23888	-2.102	-1.85282	0.620676	2.77201	2.38315	1.92528	-2.06457	0.0629416	+	0.00402318
Plp1	MGI:97623	PLP1	HGNC:9086	ENSMUSG00000031425	ENSG00000123560	1440	406	0.0363329	0.608684	-0.352823	3.60674	3.87033	4.16807	3.88172	0.0973981	0.0725783	+	0.000303161
Pdia3	MGI:95834	PDIA3	HGNC:4606	ENSMUSG00000027248	ENSG00000167004	809	1233	-3.88134	-4.25303	-4.74784	-0.797202	-0.356643	-0.558952	-0.570932	-4.29407	0.0757224	+	0.000188629
Ckb	MGI:88407	CKB	HGNC:1991	ENSMUSG00000001270	ENSG00000166165	732	889	2.35517	3.09558	3.52624	6.24539	6.17648	6.96492	6.46226	2.99233	0.0902498	+	0.00122369
Ube2v2	MGI:1917870	UBE2V2	HGNC:12495	ENSMUSG00000022674	ENSG00000169139	622	1782	-0.19738	0.273129	-0.657124	3.33824	2.91799	3.54994	3.26872	-0.193791	0.0907151	+	0.000447538
Pip4k2a	MGI:1298206	PIP4K2A	HGNC:8997	ENSMUSG00000026737	ENSG00000150867	338	229	-0.253172	-0.522266	-0.000564041	3.53855	2.4402	3.61898	3.19925	-0.258667	0.0910048	+	0.00107213
Pacsin1	MGI:1345181	PACSIN1	HGNC:8570	ENSMUSG00000040276	ENSG00000124507	404	493	-0.663867	-1.28468	-0.778191	1.70387	2.58097	3.17049	2.48511	-0.908912	0.0951258	+	0.00190135
Rras2	MGI:1914172	RRAS2	HGNC:17271	ENSMUSG00000055723	ENSG00000133818	432	1534	-1.11539	-1.05177	-1.92628	2.32891	1.1613	2.19406	1.89475	-1.36448	0.104442	+	0.00216304
Lrrc47	MGI:1920196	LRRC47	HGNC:29207	ENSMUSG00000029028	ENSG00000130764	1224	917	-5.81147	-4.68583	-4.07428	-2.04744	-1.35242	-1.62497	-1.67494	-4.85719	0.110166	+	0.00435941
Nme1	MGI:97355	NME1	HGNC:7849	ENSMUSG00000037601	NOT_FOUND	842	739	-1.3711	-2.32466	-1.81316	1.54673	1.60714	0.838684	1.33085	-1.83631	0.111324	+	0.00102087
Fam49b	MGI:1923520	FAM49B	HGNC:25216	ENSMUSG00000022378	ENSG00000153310	1698	433	-2.64929	-2.33906	-3.17401	0.891051	0.493234	-0.0531647	0.443707	-2.72079	0.11153	+	0.000988815
Ogt	MGI:1339639	OGT	HGNC:8127	ENSMUSG00000034160	ENSG00000147162	2173	2329	-2.89297	-3.60521	-2.79351	0.841891	-0.216251	-0.46149	0.0547166	-3.09723	0.112504	+	0.00266836
Rpl38	MGI:1914921	RPL38	HGNC:10349	ENSMUSG00000057322	ENSG00000172809	1320	923	0.690529	0.0601195	-0.859987	3.66498	2.94363	2.59072	3.06644	-0.0364459	0.116396	+	0.00486331
Vsnl1	MGI:1349453	VSNL1	HGNC:12722	ENSMUSG00000054459	ENSG00000163032	1347	1252	-2.01958	-2.27825	-1.61947	0.626456	2.01877	0.731758	1.12566	-1.97243	0.116783	+	0.00312714
Dpysl2	MGI:1349763	DPYSL2	HGNC:3014	ENSMUSG00000022048	ENSG00000092964	1523	187	2.0374	2.3977	2.45422	5.38965	5.04664	5.55214	5.32948	2.29644	0.12217	+	0.000106136
Eno1	MGI:95393	ENO1	HGNC:3350	ENSMUSG00000063524	ENSG00000074800	2070	1970	0.704649	1.25748	1.30967	4.09861	4.38402	3.79892	4.09385	1.0906	0.124719	+	0.000306184
Kif1a	MGI:108391	KIF1A	HGNC:888	ENSMUSG00000014602	ENSG00000130294	2167	2147	-4.85768	-4.61153	-5.37962	-2.3647	-2.00923	-1.68883	-2.02092	-4.94961	0.131334	+	0.000608585
Cfl1	MGI:101757	CFL1	HGNC:1874	ENSMUSG00000056201	ENSG00000172757	420	2335	1.84179	1.49367	1.05949	4.25463	4.25833	4.58461	4.36586	1.46498	0.133891	+	0.000321823
Enpp6	MGI:2445171	ENPP6	HGNC:23409	ENSMUSG00000038173	ENSG00000164303	1171	1346	0.224046	0.366749	0.0554291	3.34196	3.04839	2.9372	3.10918	0.215408	0.134551	+	4.31976e-05
Crmp1	MGI:107793	CRMP1	HGNC:2365	ENSMUSG00000029121	ENSG00000072832	2162	1396	-3.79104	-2.93755	-3.60543	-0.805575	-0.889957	-0.155571	-0.617034	-3.44467	0.140863	+	0.00124565
Ube2n	MGI:1934835	UBE2N	HGNC:12492	ENSMUSG00000074781	ENSG00000102069	147	968	-1.71134	-0.378671	-1.30143	1.805	1.88965	1.35625	1.68363	-1.13048	0.142189	+	0.00275577
Slc9a3r2	MGI:1890662	SLC9A3R2	HGNC:11076	ENSMUSG00000002504	ENSG00000065054	1868	1345	-3.33472	-2.85587	-1.99224	-0.234093	0.234638	0.221295	0.0739468	-2.72761	0.143433	+	0.00267054
Napb	MGI:104562	NAPB	HGNC:15751	ENSMUSG00000027438	ENSG00000125814	2261	1384	0.0296685	0.316271	-1.09419	2.53827	2.86704	2.08719	2.4975	-0.249416	0.148969	+	0.00483316
Phgdh	MGI:1355330	PHGDH	HGNC:8923	ENSMUSG00000053398	ENSG00000092621	393	1120	-0.179422	0.62198	-0.321477	2.95649	2.0111	3.28058	2.74939	0.0403603	0.152933	+	0.00488656
Pak1	MGI:1339975	PAK1	HGNC:8590	ENSMUSG00000030774	ENSG00000149269	2224	793	-2.26882	-1.21384	-2.6268	0.495821	0.470622	1.00797	0.658139	-2.03649	0.154467	+	0.00419873
Mtap4	MGI:97178	MAP4	HGNC:6862	ENSMUSG00000047011	ENSG00000047849	1903	1827	-5.00457	-4.36009	-3.77108	-1.46443	-2.13672	-1.78697	-1.79604	-4.37858	0.166947	+	0.00312148
Trap1	MGI:1915265	TRAP1	HGNC:16264	ENSMUSG00000005981	ENSG00000126602	956	781	-5.65548	-4.33323	-4.99211	-2.37096	-2.62826	-2.30563	-2.43495	-4.99361	0.169733	+	0.00290533
Cox5b	MGI:88475	COX5B	HGNC:2269	ENSMUSG00000061518	ENSG00000135940	682	243	-4.20561	-4.8368	-4.59093	-1.98167	-1.54179	-2.46356	-1.99567	-4.54444	0.170901	+	0.00140154
Hspa2	MGI:96243	HSPA2	HGNC:5235	ENSMUSG00000059970	ENSG00000126803	274	1753	-1.77997	-1.16219	-0.719514	1.92275	0.900233	1.1285	1.31716	-1.22056	0.172215	+	0.0043593
Hsp90aa1	MGI:96250	HSP90AA1	HGNC:5253	ENSMUSG00000021270	ENSG00000080824	1847	1575	-0.573296	-0.626009	-0.471524	1.74843	2.62033	1.40767	1.92548	-0.556943	0.178944	+	0.00241478
Rab1	MGI:97842	RAB1A	HGNC:9758	ENSMUSG00000020149	ENSG00000138069	200	196	-2.20443	-1.92739	-2.11219	0.946543	0	0.139114	0.361886	-2.08134	0.183872	+	0.00133558
Eif4a2	MGI:106906	EIF4A2	HGNC:3284	ENSMUSG00000022884	ENSG00000156976	1753	1778	-1.79168	-1.50815	-1.21666	1.11855	0.85471	0.839274	0.937511	-1.50549	0.1839	+	0.000207172
Tufm	MGI:1923686	TUFM	HGNC:12420	ENSMUSG00000073838	ENSG00000178952	864	1315	0.494167	0.252235	0.218439	3.06406	1.99614	2.8531	2.63777	0.321614	0.200802	+	0.00237108
Tppp	MGI:1920198	TPPP	HGNC:24164	ENSMUSG00000021573	ENSG00000171368	450	340	-1.5955	-0.963831	-1.30274	1.15942	0.512972	1.40391	1.02543	-1.28736	0.201271	+	0.00199962
Ap1s1	MGI:1098244	AP1S1	HGNC:559	ENSMUSG00000004849	ENSG00000106367	1156	304	-2.27454	-2.48246	-2.49398	-0.438828	0.16007	-0.0762454	-0.118335	-2.41699	0.203252	+	0.000257943
Ap3b2	MGI:1100869	AP3B2	HGNC:567	ENSMUSG00000062444	ENSG00000103723	204	1863	-2.87549	-2.39519	-2.40253	0.0237442	-0.811207	-0.531856	-0.439773	-2.55774	0.230372	+	0.00192655
Dnm1l	MGI:1921256	DNM1L	HGNC:2973	ENSMUSG00000022789	ENSG00000087470	1144	2104	0.177822	0.349464	-0.6815	1.90649	2.28625	1.71789	1.97021	-0.0514045	0.246282	+	0.00494516
Snx1	MGI:1928395	SNX1	HGNC:11172	ENSMUSG00000032382	ENSG00000028528	1291	2125	-0.265012	0.012683	0.293521	1.4054	2.2923	2.26108	1.98626	0.0137305	0.254806	+	0.0040384
Uqcrc2	MGI:1914253	UQCRC2	HGNC:12586	ENSMUSG00000030884	ENSG00000140740	1715	345	-0.320498	-1.50388	-0.707547	1.06422	0.94586	1.33868	1.11625	-0.843976	0.256988	+	0.00593619
Dctn1	MGI:107745	DCTN1	HGNC:2711	ENSMUSG00000031865	ENSG00000204843	2423	2351	-0.558101	-0.659567	-1.1964	0.974194	1.20611	1.23932	1.13987	-0.804691	0.259793	+	0.000826173
Dync1li2	MGI:107738	DYNC1LI2	HGNC:2966	ENSMUSG00000035770	ENSG00000135720	407	1878	-1.6719	-1.03692	-1.62551	0.693096	0.0201898	0.752169	0.488485	-1.44478	0.261837	+	0.00341919
Atp1b2	MGI:88109	ATP1B2	HGNC:805	ENSMUSG00000041329	ENSG00000129244	1594	496	0.47874	0.0284823	0.523792	2.26503	1.94312	2.39971	2.20262	0.343672	0.275677	+	0.000870188
Sdcbp	MGI:1337026	SDCBP	HGNC:10662	ENSMUSG00000028249	ENSG00000137575	1664	287	-1.76123	-1.85051	-2.29921	-0.0611286	-0.115709	-0.462827	-0.213222	-1.97032	0.295844	+	0.00108848
Cadps	MGI:1350922	CADPS	HGNC:1426	ENSMUSG00000054423	ENSG00000163618	1634	1547	-2.28509	-1.76356	-2.33064	-0.842977	-0.640683	-0.0843648	-0.522675	-2.12643	0.329019	+	0.00527234
Tollip	MGI:1891808	TOLLIP	HGNC:16476	ENSMUSG00000025139	ENSG00000078902	1105	887	-3.7071	-4.16514	-4.62117	-2.80737	-2.61716	-2.35473	-2.59309	-4.16447	0.336485	+	0.00595625
Eef1a1	MGI:1096881	EEF1A1	HGNC:3189	ENSMUSG00000037742	ENSG00000156508	1908	1343	3.19436	2.69895	3.21545	4.33093	4.47773	4.38211	4.39693	3.03626	0.389401	+	0.00144853
Cand1	MGI:1261820	CAND1	HGNC:30688	ENSMUSG00000020114	ENSG00000111530	1106	2398	-1.51281	-0.82921	-1.02017	0.45398	0.13021	0.113171	0.232454	-1.12073	0.391427	+	0.00429665
Flot1	MGI:1100500	FLOT1	HGNC:3757	ENSMUSG00000059714	ENSG00000137312	878	276	2.94347	2.39905	2.74671	3.65518	4.02935	3.73143	3.80532	2.69641	0.463644	+	0.00479822
Tubb2c	MGI:1915472	TUBB2C	HGNC:20771	ENSMUSG00000036752	ENSG00000188229	278	971	8.57461	8.88287	8.43398	9.75398	9.70645	9.572	9.67747	8.63049	0.483978	+	0.0018675
Ywhah	MGI:109194	YWHAH	HGNC:12853	ENSMUSG00000018965	ENSG00000128245	1349	1160	2.63225	2.44518	2.31129	3.2873	3.4377	3.73495	3.48665	2.46291	0.491838	+	0.00314426
C85492	MGI:2143424	C3orf39	HGNC:25902	ENSMUSG00000066235	ENSG00000144647	1231	1588	-4.04672	-3.60639	-3.6492	-2.81423	-2.90711	-2.68351	-2.80161	-3.76744	0.511987	+	0.00333601
Flot2	MGI:103309	FLOT2	HGNC:3758	ENSMUSG00000061981	ENSG00000132589	2300	2258	3.8944	3.65914	3.80046	4.47676	4.81879	4.426	4.57385	3.78467	0.578671	+	0.00500516
Stub1	MGI:1891731	STUB1	HGNC:11427	ENSMUSG00000039615	ENSG00000103266	805	2067	-1.28563	-1.34994	-1.29575	-0.62571	-0.647488	-0.817295	-0.696831	-1.31044	0.65356	+	0.000652091

## Sheet: Enriched in mouse
Appr Gene (m)	MGI ID	Appr Gene (h)	HGNC ID	Ensembl (m)	Ensembl (h)	human ibaq protein group id	mouse ibaq protein group id	iBAQ mPSD01 (Log2, normalised)	iBAQ mPSD02 (Log2, normalised)	iBAQ mPSD03 (Log2, normalised)	iBAQ hPSD01 (Log2, normalised)	iBAQ hPSD02 (Log2, normalised)	iBAQ hPSD03 (Log2, normalised)	iBAQ hPSD average (Log2, normalised)	iBAQ mPSD average (Log2, normalised)	Average fold change (mPSD from hDB/hPSD from mDB)	t-test Significant (Permutation 0.01)	t-test p value
Sept5	MGI:1195461	SEPT5	HGNC:9164	ENSMUSG00000072214	ENSG00000184702	2308	2408	7.31569	7.5161	7.62552	-1.42597	1.36514	-0.138191	-0.0663415	7.48577	187.678	+	0.000742247
Cacna2d3	MGI:1338890	CACNA2D3	HGNC:15460	ENSMUSG00000021991	ENSG00000157445	1687	689	1.36497	0.648437	0.569731	-3.58515	-4.64642	-6.48239	-4.90465	0.861046	54.4062	+	0.00284481
Mdh1	MGI:97051	MDH1	HGNC:6970	ENSMUSG00000020321	ENSG00000014641	2420	1622	7.5571	5.87729	7.42558	2.41694	1.99331	0.586846	1.6657	6.95332	39.0601	+	0.00238457
Camk2g	MGI:88259	CAMK2G	HGNC:1463	ENSMUSG00000021820	ENSG00000148660	2403	526	2.74739	3.74786	3.27702	-2.43582	-2.47939	-0.822434	-1.91255	3.25742	36.0012	+	0.00111001
Gria4	MGI:95811	GRIA4	HGNC:4574	ENSMUSG00000025892	ENSG00000152578	2229	740	0.371945	0.537351	1.15229	-4.95648	-3.31962	-3.38626	-3.88745	0.687194	23.829	+	0.00144518
Dbn1	MGI:1931838	DBN1	HGNC:2695	ENSMUSG00000034675	ENSG00000113758	2318	858	4.0261	3.92862	4.85872	-0.970198	0.725587	-0.339974	-0.194862	4.27115	22.1006	+	0.00149296
Anks1b	MGI:1924781	ANKS1B	HGNC:24600	ENSMUSG00000058589	ENSG00000185046	2042	2205	5.52598	5.94121	5.5934	0.73973	1.67261	1.68795	1.36676	5.68686	19.9747	+	0.000218239
Dlgap4	MGI:2138865	DLGAP4	HGNC:24476	ENSMUSG00000061689	ENSG00000080845	253	2249	1.42475	1.29902	1.40224	-1.97088	-2.19027	-3.87778	-2.67964	1.37534	16.6215	+	0.00255709
Mal2	MGI:2146021	MAL2	HGNC:13634	ENSMUSG00000024479	ENSG00000147676	1056	1036	4.97981	5.12162	5.30231	0.742307	2.14981	0.750815	1.21431	5.13458	15.1397	+	0.00119447
Rpl6	MGI:108057	RPL6	HGNC:10362	ENSMUSG00000029614	ENSG00000089009	1775	1401	1.12128	0.0507147	0.613515	-2.11882	-3.96962	-3.0977	-3.06205	0.595171	12.6163	+	0.00407266
D3Bwg0562e	MGI:106530	NOT_FOUND	NOT_FOUND	ENSMUSG00000044667	ENSG00000117600	1818	1870	1.79666	1.45932	1.30063	-2.53285	-1.84006	-1.69006	-2.02099	1.51887	11.6306	+	0.000287379
Shisa7	MGI:3605641	SHISA7	HGNC:35409	ENSMUSG00000053550	ENSG00000187902	2422	2377	1.99562	2.39267	2.15048	-2.08267	-0.353563	-1.42511	-1.28712	2.17959	11.0556	+	0.00257373
Lgi1	MGI:1861691	LGI1	HGNC:6572	ENSMUSG00000067242	ENSG00000108231	661	384	1.60658	2.34388	2.30812	-1.29225	-2.0083	-0.796624	-1.36572	2.0862	10.9429	+	0.00125873
Sept10	MGI:1918110	SEPT10	HGNC:14349	ENSMUSG00000019917	ENSG00000186522	1828	1317	1.60806	2.8688	2.41726	-1.80125	-0.201385	-1.41912	-1.14059	2.29804	10.8425	+	0.00479371
Begain	MGI:3044626	BEGAIN	HGNC:24163	ENSMUSG00000040867	ENSG00000183092	386	1732	0.708434	1.3205	0.943353	-2.24287	-1.66181	-3.27086	-2.39185	0.990762	10.4296	+	0.00254796
Ppfia4	MGI:1915757	PPFIA4	HGNC:9248	ENSMUSG00000026458	ENSG00000143847	2183	2406	0.713228	0.672738	0.461757	-2.25735	-3.30772	-2.39673	-2.65393	0.615908	9.64541	+	0.000642212
Pura	MGI:103079	PURA	HGNC:9701	ENSMUSG00000043991	ENSG00000185129	754	312	4.89076	4.60011	4.79051	1.27497	1.38056	2.0419	1.56581	4.76046	9.15556	+	0.000232397
Shank2	MGI:2671987	SHANK2	HGNC:14295	ENSMUSG00000037541	ENSG00000162105	2357	1673	3.18845	2.77265	3.3766	-0.412293	0.432238	0.0807803	0.0335753	3.11256	8.45021	+	0.000528374
Sh3pxd2a	MGI:1298393	SH3PXD2A	HGNC:23664	ENSMUSG00000053617	ENSG00000107957	1924	1329	-2.3625	-2.57727	-2.29616	-5.27758	-6.41118	-4.73733	-5.47536	-2.41198	8.35932	+	0.00360775
Dlgap2	MGI:2443181	DLGAP2	HGNC:2906	ENSMUSG00000047495	ENSG00000198010	1025	1045	1.77302	1.99731	1.97618	-1.38873	-0.681728	-1.36584	-1.14543	1.9155	8.34513	+	0.000227587
Dlgap3	MGI:3039563	DLGAP3	HGNC:30368	ENSMUSG00000042388	ENSG00000116544	1429	847	3.0114	3.33454	3.16416	-0.426362	0.552934	0.203852	0.110141	3.17004	8.33911	+	0.000529845
Kalrn	MGI:2685385	KALRN	HGNC:4814	ENSMUSG00000061751	ENSG00000160145	909	2119	1.1266	0.864907	1.45293	-2.49729	-0.951704	-2.26233	-1.90377	1.14814	8.29313	+	0.00392144
Dpp6	MGI:94921	DPP6	HGNC:3010	ENSMUSG00000061576	ENSG00000130226	1520	2378	-1.42304	-1.61974	-0.972672	-4.49395	-4.19967	-4.37094	-4.35485	-1.33848	8.0913	+	0.000135661
Grin1	MGI:95819	GRIN1	HGNC:4584	ENSMUSG00000026959	ENSG00000176884	2090	2247	3.41243	3.69531	3.01768	-0.0849617	0.503442	0.8915	0.43666	3.37514	7.66604	+	0.00104509
Rimbp2	MGI:2443235	RIMBP2	HGNC:30339	ENSMUSG00000029420	ENSG00000060709	1290	2325	0.646745	0.445611	0.292231	-2.14861	-2.08766	-3.11588	-2.45072	0.461529	7.5279	+	0.00112128
Dlg3	MGI:1888986	DLG3	HGNC:2902	ENSMUSG00000000881	ENSG00000082458	744	2135	4.41152	4.38455	4.55046	0.78896	2.04476	1.81427	1.54933	4.44884	7.46176	+	0.00173706
Cacnb4	MGI:103301	CACNB4	HGNC:1404	ENSMUSG00000017412	ENSG00000182389	397	2148	0.995684	1.38663	1.22212	-2.52201	-1.56221	-0.904572	-1.66293	1.20148	7.28238	+	0.00405499
Slc8a2	MGI:107996	SLC8A2	HGNC:11069	ENSMUSG00000030376	ENSG00000118160	365	991	1.5638	1.04073	1.28642	-2.19562	-0.803233	-1.66161	-1.55349	1.29698	7.21233	+	0.00275203
Aifm3	MGI:1919418	AIFM3	HGNC:26398	ENSMUSG00000022763	ENSG00000183773	1041	1392	-0.400768	-0.299269	-0.0606994	-2.06582	-3.72508	-3.36784	-3.05292	-0.253579	6.96121	+	0.00552747
Fbxo41	MGI:1261912	FBXO41	HGNC:29409	ENSMUSG00000047013	ENSG00000163013	1567	1851	3.78358	3.59469	3.39912	0.134786	1.20886	1.13821	0.827285	3.59246	6.79831	+	0.00161391
Shank3	MGI:1930016	SHANK3	HGNC:14294	ENSMUSG00000022623	ENSG00000099882	627	1677	4.52433	4.74373	4.25078	0.955114	2.21505	2.21129	1.79382	4.50628	6.5544	+	0.00360188
Erc1	MGI:2151013	ERC1	HGNC:17072	ENSMUSG00000030172	ENSG00000082805	1230	294	1.14451	0.788663	0.6745	-1.69536	-1.84347	-1.91021	-1.81635	0.869226	6.43336	+	6.53258e-05
Mark2	MGI:99638	MARK2	HGNC:3332	ENSMUSG00000024969	ENSG00000072518	2159	2092	1.55002	1.43429	2.01863	-1.12113	-0.536346	-1.34833	-1.00193	1.66765	6.36244	+	0.00088907
Gm88	MGI:2684934	C6orf154	HGNC:21375	ENSMUSG00000071073	ENSG00000204052	1254	1336	3.23058	3.96683	3.17131	0.751316	1.46609	0.173381	0.796929	3.45624	6.31732	+	0.00420665
Dlg2	MGI:1344351	DLG2	HGNC:2901	ENSMUSG00000052572	ENSG00000150672	2036	1137	5.03284	5.19476	5.48961	1.95184	3.16291	2.68021	2.59832	5.23907	6.23656	+	0.00217655
Srcin1	MGI:1933179	SRCIN1	HGNC:29506	ENSMUSG00000038453	ENSG00000017373	1900	2389	5.44844	5.31879	5.02397	2.66945	2.45106	2.81882	2.64644	5.26373	6.13596	+	9.19799e-05
Btbd17	MGI:1919264	BTBD17	HGNC:33758	ENSMUSG00000000202	ENSG00000204347	1824	343	1.7711	2.21381	2.39518	-0.731495	-1.06558	0.388313	-0.469586	2.1267	6.04727	+	0.00553764
Syngap1	MGI:3039785	SYNGAP1	HGNC:11497	ENSMUSG00000067629	ENSG00000197283	1258	2202	5.82166	6.0726	6.0509	3.02709	3.60513	3.63819	3.42347	5.98172	5.88992	+	0.000280792
Ntm	MGI:2446259	NTM	HGNC:17941	ENSMUSG00000059974	ENSG00000182667	2031	1780	5.52612	5.31606	5.20702	2.99332	2.73973	2.76378	2.83228	5.34973	5.72572	+	3.44158e-05
Gfra2	MGI:1195462	GFRA2	HGNC:4244	ENSMUSG00000022103	ENSG00000168546	414	252	0.0133181	0.28955	0.0907036	-1.56906	-2.69831	-2.78458	-2.35065	0.131191	5.58611	+	0.00343669
Hsp90ab1	MGI:96247	HSP90AB1	HGNC:5258	ENSMUSG00000023944	ENSG00000205527	1978	1194	1.65015	1.35339	1.81024	-1.18373	-0.102103	-1.29062	-0.858819	1.60459	5.51519	+	0.00361022
Dlg1	MGI:107231	DLG1	HGNC:2900	ENSMUSG00000022770	ENSG00000075711	959	1834	3.01583	2.8708	2.83946	0.432933	0.35531	0.734195	0.507479	2.9087	5.2825	+	4.70796e-05
Palm	MGI:1261814	PALM	HGNC:8594	ENSMUSG00000035863	ENSG00000099864	1679	656	0.828554	0.538459	1.61808	-1.35751	-1.45511	-1.39762	-1.40341	0.99503	5.27233	+	0.00177278
Elfn2	MGI:3608416	ELFN2	HGNC:29396	ENSMUSG00000043460	ENSG00000166897	1537	2061	0.344851	0.313686	0.0534742	-2.30041	-2.12825	-2.05065	-2.15977	0.237337	5.26745	+	3.49404e-05
Adam23	MGI:1345162	ADAM23	HGNC:202	ENSMUSG00000025964	ENSG00000114948	689	651	0.036082	0.707946	0.359886	-1.87559	-2.24883	-1.94223	-2.02222	0.367971	5.24226	+	0.000448255
Ppp1cc	MGI:104872	PPP1CC	HGNC:9283	ENSMUSG00000004455	ENSG00000186298	198	1169	2.02979	2.0731	2.36874	-0.802971	-0.100633	0.20773	-0.231958	2.15721	5.23855	+	0.00166897
Grin2a	MGI:95820	GRIN2A	HGNC:4585	ENSMUSG00000059003	ENSG00000183454	951	309	1.02746	0.953096	1.12105	-1.3098	-1.00876	-1.56281	-1.29379	1.03387	5.01991	+	0.000154932
skt	MGI:98314	NOT_FOUND	NOT_FOUND	NOT_FOUND	ENSG00000120549	1118	1847	1.51786	1.44088	1.57856	-1.15007	-0.547493	-0.724362	-0.807307	1.51243	4.99242	+	0.000224035
Gria2	MGI:95809	GRIA2	HGNC:4572	ENSMUSG00000033981	ENSG00000120251	1419	2113	4.73392	4.93348	5.39065	2.23455	3.30081	2.73466	2.75667	5.01935	4.79881	+	0.00341614
Strn	MGI:1333757	STRN	HGNC:11424	ENSMUSG00000024077	ENSG00000115808	498	1679	0.355549	0.0422898	0.0637626	-1.89084	-2.13071	-1.93341	-1.98498	0.153867	4.40411	+	6.87958e-05
Sorbs2	MGI:1924574	SORBS2	HGNC:24098	ENSMUSG00000031626	ENSG00000154556	2437	2217	1.00527	1.02703	1.03444	-1.58178	-0.431852	-1.26768	-1.09377	1.02224	4.33495	+	0.00351566
Gria3	MGI:95810	GRIA3	HGNC:4573	ENSMUSG00000001986	ENSG00000125675	1424	741	3.7025	3.93937	4.33395	1.35418	2.39316	1.92387	1.8904	3.99194	4.29166	+	0.00396852
Erc2	MGI:1098749	ERC2	HGNC:31922	ENSMUSG00000040640	ENSG00000187672	2095	1955	4.47965	4.5033	3.81191	1.69263	2.33862	2.61503	2.21543	4.26495	4.1397	+	0.00447096
D430041D05Rik	MGI:2181743	C11orf41	HGNC:24836	ENSMUSG00000068373	ENSG00000110427	2352	2243	2.40054	2.16238	2.28521	0.201646	0.232553	0.382142	0.272114	2.28271	4.02949	+	2.22477e-05
Gphn	MGI:109602	GPHN	HGNC:15465	ENSMUSG00000047454	ENSG00000171723	532	2310	2.54085	2.39488	2.51028	0.0544217	0.918733	0.531929	0.501695	2.482	3.94577	+	0.00145751
Unc13a	MGI:3051532	UNC13A	HGNC:23150	ENSMUSG00000074246	ENSG00000130477	1186	1801	0.715267	0.9494	0.446443	-1.51361	-1.05547	-1.25514	-1.27474	0.703704	3.94068	+	0.000549787
Gabbr2	MGI:2386030	GABBR2	HGNC:4507	ENSMUSG00000039809	ENSG00000136928	867	1839	2.65124	2.58625	2.76703	0.432105	0.899846	0.874178	0.735376	2.66817	3.81794	+	0.000274373
Nrxn3	MGI:1096389	NRXN3	HGNC:8010	ENSMUSG00000066392	ENSG00000021645	1359	1189	-0.599938	-1.11545	-0.525491	-2.60316	-2.58635	-2.82809	-2.67253	-0.746959	3.79887	+	0.000665964
Lphn3	MGI:2441950	LPHN3	HGNC:20974	ENSMUSG00000037605	ENSG00000150471	1177	1846	-0.584017	-1.25286	-0.926386	-3.4188	-2.65	-2.44068	-2.83649	-0.921089	3.77219	+	0.00568358
Cit	MGI:105313	CIT	HGNC:1985	ENSMUSG00000029516	ENSG00000122966	2174	1307	1.81531	2.34785	2.45107	-0.22385	0.612622	0.509636	0.299469	2.20474	3.7458	+	0.0044127
Homer1	MGI:1347345	HOMER1	HGNC:17512	ENSMUSG00000007617	ENSG00000152413	131	1759	5.50222	5.35049	5.96427	3.30961	3.60406	4.25568	3.72312	5.60566	3.68724	+	0.00492753
Rasal2	MGI:2443881	RASAL2	HGNC:9874	ENSMUSG00000070565	ENSG00000075391	237	1807	-2.14285	-2.04766	-1.91995	-3.90457	-4.18599	-3.64946	-3.91334	-2.03682	3.67188	+	0.000364528
Fxr2	MGI:1346074	FXR2	HGNC:4024	ENSMUSG00000018765	ENSG00000129245	537	2179	-0.483447	-0.0877688	-0.0468847	-1.76165	-2.29422	-2.17591	-2.07726	-0.206033	3.65844	+	0.000928938
Agap2	MGI:3580016	AGAP2	HGNC:16921	ENSMUSG00000025422	ENSG00000135439	1375	1671	2.06542	2.24697	2.03063	-0.0536292	0.255806	0.597287	0.266488	2.11434	3.59965	+	0.000756764
Lmtk3	MGI:3039582	LMTK3	HGNC:19295	ENSMUSG00000062044	ENSG00000142235	1140	2065	-0.161123	-0.0731658	0.421733	-1.50406	-1.57367	-2.17222	-1.74998	0.0624813	3.51242	+	0.00289914
Dlgap1	MGI:1346065	DLGAP1	HGNC:2905	ENSMUSG00000003279	ENSG00000170579	691	2169	2.60601	3.02028	3.26956	1.18897	1.62562	0.68764	1.16741	2.96528	3.47708	+	0.00569518
Actn1	MGI:2137706	ACTN1	HGNC:163	ENSMUSG00000015143	ENSG00000072110	2268	1720	4.86693	5.06675	5.66568	3.14355	3.68354	3.39	3.4057	5.19979	3.46797	+	0.0033079
Prosapip1	MGI:2656976	NOT_FOUND	NOT_FOUND	ENSMUSG00000037703	ENSG00000088899	920	2174	-0.457176	-0.11576	-0.167995	-1.84186	-2.13482	-2.10397	-2.02688	-0.246977	3.43404	+	0.00022738
Rims1	MGI:2152971	RIMS1	HGNC:17282	ENSMUSG00000041670	ENSG00000079841	1823	2308	2.01201	1.32343	1.50213	-0.315357	-0.427133	0.267739	-0.158251	1.61252	3.41237	+	0.00403612
Yes1	MGI:99147	YES1	HGNC:12841	ENSMUSG00000014932	ENSG00000176105	482	76	-0.334883	0.318709	0.248373	-1.9494	-1.84011	-1.27972	-1.68974	0.0773993	3.40379	+	0.00381608
Prkar1a	MGI:104878	PRKAR1A	HGNC:9388	ENSMUSG00000020612	ENSG00000108946	683	2286	2.93603	3.22085	3.00804	1.80785	0.969912	1.33599	1.37125	3.05497	3.21256	+	0.00281323
Itsn2	MGI:1338049	ITSN2	HGNC:6184	ENSMUSG00000020640	ENSG00000198399	1910	661	-1.81562	-2.41917	-2.62938	-3.93974	-4.00329	-3.9243	-3.95577	-2.28805	3.17712	+	0.00243689
Fam18a	MGI:3665441	FAM81A	HGNC:28379	ENSMUSG00000050908	ENSG00000166676	1548	2043	1.49786	1.94565	2.2854	0.103052	0.502831	0.213564	0.273149	1.90964	3.10908	+	0.00313341
Cdkl5	MGI:1278336	CDKL5	HGNC:11411	ENSMUSG00000031292	ENSG00000008086	2252	1738	-0.50377	-0.839691	-0.771802	-2.63319	-1.89628	-2.35788	-2.29578	-0.705088	3.01195	+	0.00261343
Ly6h	MGI:1346030	LY6H	HGNC:6728	ENSMUSG00000022577	ENSG00000176956	509	834	-1.07773	-0.919495	-0.949529	-2.74601	-2.50593	-2.14554	-2.46583	-0.982251	2.79641	+	0.00121001
Aak1	MGI:1098687	AAK1	HGNC:19679	ENSMUSG00000057230	ENSG00000115977	2421	1690	2.66969	2.17367	2.79224	0.914379	0.892719	1.46145	1.08952	2.5452	2.74287	+	0.00537391
Iqsec2	MGI:3528396	IQSEC2	HGNC:29059	ENSMUSG00000041115	ENSG00000124313	2370	2273	3.17041	3.4051	3.46872	1.58796	2.0783	2.11044	1.92556	3.34808	2.68052	+	0.00176577
Pkp4	MGI:109281	PKP4	HGNC:9026	ENSMUSG00000026991	ENSG00000144283	2257	2071	1.83808	1.79707	1.9897	0.352558	0.533041	0.49489	0.460163	1.87495	2.6662	+	6.09495e-05
Numbl	MGI:894702	NUMBL	HGNC:8061	ENSMUSG00000063160	ENSG00000105245	104	1330	0.709378	0.835171	0.651707	-0.857839	-0.320667	-0.580307	-0.586271	0.732086	2.49382	+	0.00130832
Syt7	MGI:1859545	SYT7	HGNC:11514	ENSMUSG00000024743	ENSG00000011347	446	1198	2.81317	2.57583	2.33303	1.08059	1.35401	1.39089	1.27516	2.57401	2.46032	+	0.00156513
Brsk1	MGI:2685946	BRSK1	HGNC:18994	ENSMUSG00000035390	ENSG00000160469	1145	2087	0.0641638	0.0893155	0.628257	-1.21493	-0.74545	-1.13332	-1.03123	0.260579	2.44836	+	0.00526836
Myo5a	MGI:105976	MYO5A	HGNC:7602	ENSMUSG00000034593	ENSG00000197535	2374	2410	5.2618	5.59553	5.11	3.93426	4.13251	4.38321	4.14999	5.32244	2.25394	+	0.00374434
Opcml	MGI:97397	OPCML	HGNC:8143	ENSMUSG00000062257	ENSG00000183715	74	1979	4.87765	4.84667	4.92627	3.76169	3.79068	3.64738	3.73325	4.88353	2.21957	+	2.03215e-05
Sept4	MGI:1270156	SEPT4	HGNC:9165	ENSMUSG00000020486	ENSG00000181013	406	2170	1.19287	0.97771	1.01096	0.0194597	-0.253824	-0.0144186	-0.0829275	1.06051	2.20907	+	0.000465884
Exoc2	MGI:1913732	EXOC2	HGNC:24968	ENSMUSG00000021357	ENSG00000112685	2279	2186	0.248185	-0.0768734	0.211637	-1.11924	-0.957629	-0.851377	-0.976081	0.12765	2.1491	+	0.00102354
Gnb2	MGI:95784	GNB2	HGNC:4398	ENSMUSG00000029711	ENSG00000130427	124	962	6.25076	6.61203	6.79045	5.51695	5.29335	5.53686	5.44905	6.55108	2.14656	+	0.00338188
Mink1	MGI:1355329	MINK1	HGNC:17565	ENSMUSG00000020827	ENSG00000141503	1399	528	0.930893	0.962204	0.871318	-0.305035	0.0346212	-0.00808213	-0.092832	0.921472	2.01993	+	0.000771127

## Sheet: PSD complexes
MGI ID	Appr Gene (h)	PSD95 Complex	NR Complex	mGluR5 Complex	human ibaq protein group id	mouse ibaq protein group id	iBAQ mPSD01 (Log2, normalised)	iBAQ mPSD02 (Log2, normalised)	iBAQ mPSD03 (Log2, normalised)	iBAQ hPSD01 (Log2, normalised)	iBAQ hPSD02 (Log2, normalised)	iBAQ hPSD03 (Log2, normalised)	iBAQ hPSD average (Log2, normalised)	iBAQ mPSD average (Log2, normalised)	Average fold change (mPSD from hDB/hPSD from mDB)	t-test Significant (Perm 0.01)	t-test p value
MGI:95820	GRIN2A	YES	YES	YES	951	309	1.02746	0.953096	1.12105	-1.3098	-1.00876	-1.56281	-1.29379	1.03387	5.01991	+	0.000154932
MGI:104560	NSF	YES	YES	YES	222	2190	3.05092	4.06606	3.77052	3.36087	4.80555	4.16327	4.1099	3.62917	0.716614		0.403654
MGI:2388633	CLTC	YES	YES	YES	767	982	4.54012	3.59152	4.00495	3.97048	5.2058	4.68292	4.61974	4.04553	0.671657		0.27208
MGI:1353495	SLC25A4	YES	YES	NO	729	219	-0.786146	-2.63369	-4.73301	3.29374	2.64569	1.86346	2.60096	-2.71762	0.0250581		0.0118252
MGI:99432	ARF3	YES	YES	NO	1321	1026	-0.599314	-2.60395	-5.06138	0.75569	0.564194	-1.21452	0.03512	-2.75488	0.144586		0.123711
MGI:107363	STXBP1	YES	YES	NO	1098	1849	-2.84615	-2.33148	-2.83605	5.52615	6.18261	6.72212	6.14363	-2.67123	0.00222057	+	2.16216e-05
MGI:87880	ACO2	YES	YES	NO	582	240	-2.41684	-1.37017	-2.37179	1.86183	2.76029	1.61324	2.07845	-2.05293	0.0570596	+	0.00106632
MGI:1346858	MAPK1	YES	YES	NO			-1.80349	-1.04272	-2.23228	0.991588	-0.670346	2.19608	0.839108	-1.69283	0.172906
MGI:99523	PRDX1	YES	YES	NO	60	427	-1.41584	-0.598912	-0.677382	1.33457	1.85124	-0.986142	0.733223	-0.897379	0.322953		0.147799
MGI:1316660	CACNG2	YES	YES	NO	82	783	-0.456452	-0.267329	0.385324	-0.950213	-2.17424	-1.31708	-1.48051	-0.112819	2.58057		0.0367525
MGI:97623	PLP1	YES	YES	NO	1440	406	0.0363329	0.608684	-0.352823	3.60674	3.87033	4.16807	3.88172	0.0973981	0.0725783	+	0.000303161
MGI:1915339	ARPC4	YES	YES	NO	2155	926	0.742666	0.320856	0.0828444	0.534196	1.20129	-0.430849	0.434879	0.382122	0.964092		0.922821
MGI:101931	SLC1A2	YES	YES	NO	1672	2058	1.99871	1.44206	0.700691	-0.287488	-0.45588	0.228444	-0.171641	1.38049	2.9325		0.0223363
MGI:1194500	ABLIM1	YES	YES	NO	1776	1688	0.902131	1.55357	1.48906	-0.0615608	1.85996	1.14424	0.980881	1.31492	1.26054		0.606085
MGI:2685385	KALRN	YES	YES	NO	909	2119	1.1266	0.864907	1.45293	-2.49729	-0.951704	-2.26233	-1.90377	1.14814	8.29313	+	0.00392144
MGI:107164	PPP3CA	YES	YES	NO	1271	421	1.73225	2.06668	1.52124	1.82443	2.0685	2.45486	2.11593	1.77339	0.788651		0.230953
MGI:102520	PHB2	YES	YES	NO	868	1498	2.75366	2.27935	1.45453	3.71008	3.10857	1.99408	2.93758	2.16252	0.584363		0.285929
MGI:1861691	LGI1	YES	YES	NO	661	384	1.60658	2.34388	2.30812	-1.29225	-2.0083	-0.796624	-1.36572	2.0862	10.9429	+	0.00125873
MGI:95739	GLUL	YES	YES	NO	354	2150	2.50731	3.04142	2.60705	2.76309	1.86484	1.26382	1.96392	2.71859	1.68725		0.180262
MGI:1346065	DLGAP1	YES	YES	NO	691	2169	2.60601	3.02028	3.26956	1.18897	1.62562	0.68764	1.16741	2.96528	3.47708	+	0.00569518
MGI:95821	GRIN2B	YES	YES	NO	1639	1491	2.99064	2.99213	3.00664	-1.20105	0.707422	0.758069	0.0881456	2.99647	7.50746		0.0107357
MGI:107231	DLG1	YES	YES	NO	959	1834	3.01583	2.8708	2.83946	0.432933	0.35531	0.734195	0.507479	2.9087	5.2825	+	4.70796e-05
MGI:1353496	SLC25A5	YES	YES	NO	257	608	4.12232	3.58425	2.33716	0.979434	-0.644825	-1.40341	-0.356267	3.34791	13.0337		0.0135674
MGI:95819	GRIN1	YES	YES	NO	2090	2247	3.41243	3.69531	3.01768	-0.0849617	0.503442	0.8915	0.43666	3.37514	7.66604	+	0.00104509
MGI:95640	GAPDH	YES	YES	NO	1408	1310	3.37782	3.39976	3.48009	3.87347	3.80663	4.64349	4.10786	3.41922	0.620439		0.0634606
MGI:106915	VDAC2	YES	YES	NO	1331	453	3.51738	3.95651	3.48886	5.44537	5.10529	4.20828	4.91965	3.65425	0.415985		0.0337652
MGI:894689	YWHAE	YES	YES	NO	54	310	3.8272	4.06414	3.4587	4.10455	4.36784	2.6314	3.70126	3.78335	1.05855		0.892137
MGI:99667	SYT1	YES	YES	NO	328	673	4.0548	4.32696	4.34503	1.98004	2.96371	3.97534	2.97303	4.24226	2.41033		0.0952989
MGI:1888986	DLG3	YES	YES	NO	744	2135	4.41152	4.38455	4.55046	0.78896	2.04476	1.81427	1.54933	4.44884	7.46176	+	0.00173706
MGI:106919	VDAC1	YES	YES	NO	1346	1258	5.3116	5.16225	4.15558	5.70718	5.40911	4.30855	5.14162	4.87648	0.832118		0.660111
MGI:106222	CAPZA2	YES	YES	NO	837	114	4.94927	4.76024	4.63936	4.03601	3.81619	4.58008	4.14409	4.78296	1.5571		0.0591025
MGI:88115	ATP5A1	YES	YES	NO	2024	690	5.08365	5.41636	4.31571	5.82731	5.4147	5.07742	5.43981	4.93857	0.7065		0.269589
MGI:1344351	DLG2	YES	YES	NO	2036	1137	5.03284	5.19476	5.48961	1.95184	3.16291	2.68021	2.59832	5.23907	6.23656	+	0.00217655
MGI:97313	NEFL	YES	YES	NO	1510	2094	5.11116	5.28188	4.84482	5.87608	6.58128	6.89981	6.45239	5.07929	0.38606		0.0138646
MGI:1201778	ATP6V0D1	YES	YES	NO	1033	1408	5.23936	4.33105	5.24508	3.97694	3.10832	4.0464	3.71056	4.9385	2.34233		0.045564
MGI:97845	RAC1	YES	YES	NO	363	599	5.4688	6.0918	6.27557	5.28561	5.869	4.29465	5.14975	5.94539	1.73585		0.200984
MGI:3039785	SYNGAP1	YES	YES	NO	1258	2202	5.82166	6.0726	6.0509	3.02709	3.60513	3.63819	3.42347	5.98172	5.88992	+	0.000280792
MGI:88257	CAMK2B	YES	YES	NO	1805	2075	5.70316	6.30548	6.1536	3.04009	4.20741	5.65135	4.29961	6.05408	3.37401		0.0867514
MGI:1277959	DLG4	YES	YES	NO	2175	2127	6.73605	6.8886	6.76516	4.00055	5.41939	4.12604	4.51533	6.7966	4.86108		0.00746897
MGI:98388	SPTBN1	YES	YES	NO	192	1469	7.39274	7.26479	7.40469	6.22499	7.44305	7.15136	6.9398	7.35407	1.33263		0.325444
MGI:88256	CAMK2A	YES	YES	NO	2376	2122	7.83959	8.6801	8.26824	8.02513	8.42726	8.35261	8.26833	8.26265	0.996065		0.984332
MGI:1927555	SLC4A4	YES	NO	YES	2414	2353	1.22575	-0.0590255	-0.174981	-3.46155	-1.93474	-2.26221	-2.55283	0.330582	7.37894		0.0111082
MGI:88108	ATP1B1	YES	NO	YES	2260	422	4.22041	4.27549	3.76273	4.71709	4.1394	5.03494	4.63048	4.08621	0.685738		0.152372
MGI:1195461	SEPT5	YES	NO	YES	2308	2408	7.31569	7.5161	7.62552	-1.42597	1.36514	-0.138191	-0.0663415	7.48577	187.678	+	0.000742247
MGI:95775	GNAO1	YES	NO	YES	1468	1242	7.90756	7.03969	7.4387	7.4019	5.60759	7.67036	6.89328	7.46198	1.48318		0.458774
MGI:107163	PPP3CB	YES	NO	NO	889	131	-4.96473	-2.20805	-3.37068	-1.02688	-0.367467	0.434693	-0.319885	-3.51449	0.109227		0.0241378
MGI:107771	ABR	YES	NO	NO	962	1762	-2.50677	-4.42462	-3.23006	-3.24991	-0.571336	-0.829391	-1.55021	-3.38715	0.279915		0.146093
MGI:87870	ACAT1	YES	NO	NO	961	956	-2.81358	-3.03462	-1.04817	-2.58747	-1.57797	-3.92494	-2.69679	-2.29879	1.31768		0.689412
MGI:1352745	FSCN1	YES	NO	NO	1180	1682	-2.23888	-2.102	-1.85282	0.620676	2.77201	2.38315	1.92528	-2.06457	0.0629416	+	0.00402318
MGI:1306775	SUCLA2	YES	NO	NO	1369	1271	-2.14456	-1.59545	-0.564991	-0.651958	-1.4939	-0.595465	-0.913773	-1.435	0.696778		0.394284
MGI:106341	ATP5O	YES	NO	NO	267	334	-2.24496	-1.15684	-1.44136	-1.61857	0.268551	-1.10709	-0.819036	-1.61439	0.576203		0.288817
MGI:1096391	NRXN1	YES	NO	NO	2032	1229	-1.59959	-1.03582	-1.09901	-2.27818	-1.85318	-1.36226	-1.8312	-1.24481	1.50149		0.139985
MGI:97591	PKM2	YES	NO	NO	1484	2332	-0.891749	-0.56178	-1.13517	1.53262	3.70636	4.30589	3.18162	-0.8629	0.0606006		0.0092392
MGI:2137679	SFXN3	YES	NO	NO	2315	575	-0.240289	-0.448341	-1.2202	0.569541	-0.560003	-3.38952	-1.12666	-0.636276	1.40482		0.70706
MGI:95809	GRIA2	YES	NO	NO	1419	2113	4.73392	4.93348	5.39065	2.23455	3.30081	2.73466	2.75667	5.01935	4.79881	+	0.00341614
MGI:1345635	PCBP1	YES	NO	NO	549	639	-0.463832	0.595146	0.232428	2.22634	-0.312389	2.5625	1.49215	0.121247	0.38665		0.22615
MGI:95811	GRIA4	YES	NO	NO	2229	740	0.371945	0.537351	1.15229	-4.95648	-3.31962	-3.38626	-3.88745	0.687194	23.829	+	0.00144518
MGI:3044626	BEGAIN	YES	NO	NO	386	1732	0.708434	1.3205	0.943353	-2.24287	-1.66181	-3.27086	-2.39185	0.990762	10.4296	+	0.00254796
MGI:101757	CFL1	YES	NO	NO	420	2335	1.84179	1.49367	1.05949	4.25463	4.25833	4.58461	4.36586	1.46498	0.133891	+	0.000321823
MGI:2138865	DLGAP4	YES	NO	NO	253	2249	1.42475	1.29902	1.40224	-1.97088	-2.19027	-3.87778	-2.67964	1.37534	16.6215	+	0.00255709
MGI:1350917	RPS3	YES	NO	NO	396	838	2.12518	1.92312	1.03146	0.369136	0.690187	0.826243	0.628522	1.69325	2.09178		0.0424377
MGI:2443181	DLGAP2	YES	NO	NO	1025	1045	1.77302	1.99731	1.97618	-1.38873	-0.681728	-1.36584	-1.14543	1.9155	8.34513	+	0.000227587
MGI:95808	GRIA1	YES	NO	NO	1414	1823	1.77971	1.69338	2.7614	-1.17707	0.315077	-1.15318	-0.671722	2.07816	6.72664		0.0101992
MGI:1915513	PDHB	YES	NO	NO	144	756	1.90065	1.90944	1.76257	1.83015	1.53269	1.32422	1.56235	1.85755	1.22705		0.128304
MGI:98107	RPS14	YES	NO	NO	845	1510	2.23797	1.86432	1.7635	1.76535	1.57575	0.777351	1.37282	1.95526	1.49738		0.157434
MGI:1196356	IQSEC1	YES	NO	NO	2324	2279	2.10702	2.27545	2.20292	0.781582	0.488102	1.51419	0.927959	2.19513	2.40689		0.0148407
MGI:97532	PDHA1	YES	NO	NO	2189	1629	2.4565	1.65792	2.90123	1.10606	1.58708	0.942648	1.21193	2.33855	2.18348		0.052182
MGI:109239	KCNAB2	YES	NO	NO	660	1427	2.50835	2.15594	2.42898	1.07098	-0.82785	0.42067	0.221267	2.36442	4.41727		0.0194691
MGI:3039563	DLGAP3	YES	NO	NO	1429	847	3.0114	3.33454	3.16416	-0.426362	0.552934	0.203852	0.110141	3.17004	8.33911	+	0.000529845
MGI:1930705	STX1B	YES	NO	NO	1945	154	3.75965	3.48131	2.88098	4.48913	4.31419	4.43084	4.41139	3.37398	0.487203		0.0171773
MGI:3528396	IQSEC2	YES	NO	NO	2370	2273	3.17041	3.4051	3.46872	1.58796	2.0783	2.11044	1.92556	3.34808	2.68052	+	0.00176577
MGI:88437	CNP	YES	NO	NO	1732	1468	3.5599	3.47192	4.18546	6.4954	4.6841	5.91496	5.69815	3.73909	0.257196		0.0277424
MGI:95810	GRIA3	YES	NO	NO	1424	741	3.7025	3.93937	4.33395	1.35418	2.39316	1.92387	1.8904	3.99194	4.29166	+	0.00396852
MGI:2137336	BAIAP2	YES	NO	NO	1275	530	5.27033	5.90651	5.59944	3.08925	4.11323	4.72108	3.97452	5.59209	3.06858		0.0338729
MGI:1924781	ANKS1B	YES	NO	NO	2042	2205	5.52598	5.94121	5.5934	0.73973	1.67261	1.68795	1.36676	5.68686	19.9747	+	0.000218239
MGI:107801	ATP5B	YES	NO	NO	1699	2033	6.83131	6.84309	6.00235	6.34775	7.2395	5.82812	6.47179	6.55892	1.06225		0.869427
MGI:1277214	SEPT11	YES	NO	NO	2456	1862	7.72824	7.15863	7.47978	7.95478	7.9456	8.17949	8.02662	7.45555	0.673116		0.0347802
MGI:88251	CALM1	NO	YES	YES	1097	2283	-2.69387	-3.91121	-1.35862	-0.656783	0.00561273	-0.390962	-0.347377	-2.65457	0.202053		0.0388397
MGI:97843	RAB3A	NO	YES	YES	748	461	-3.63328	-0.967355	-2.3887	-0.391986	-4.25746	-2.58789	-2.41245	-2.32978	1.05897		0.954402
MGI:97613	PLCB1	NO	YES	YES	1436	2028	2.50715	-0.68304	-1.40393	0.422711	0.587604	0.378869	0.463061	0.140059	0.799405		0.801656
MGI:1277955	BSN	NO	YES	YES	639	826	0.789416	1.50025	0.809657	-1.10563	-0.207599	-1.06279	-0.792003	1.03311	3.54335		0.0081863
MGI:96721	L1CAM	NO	YES	YES	1807	1818	1.08214	0.718082	0.912347	-0.107409	-0.605505	0.199853	-0.17102	0.90419	2.10703		0.0139032
MGI:105313	CIT	NO	YES	YES	2174	1307	1.81531	2.34785	2.45107	-0.22385	0.612622	0.509636	0.299469	2.20474	3.7458	+	0.0044127
MGI:97175	MAP2	NO	YES	YES	136	2394	2.1156	2.28761	1.89804	0.775545	1.56673	1.1825	1.17492	2.10042	1.89933		0.0220942
MGI:88105	ATP1A1	NO	YES	YES	223	1387	2.40688	2.56418	2.51606	2.91525	2.19466	2.51855	2.54282	2.49571	0.967876		0.836183
MGI:109194	YWHAH	NO	YES	YES	1349	1160	2.63225	2.44518	2.31129	3.2873	3.4377	3.73495	3.48665	2.46291	0.491838	+	0.00314426
MGI:109484	YWHAZ	NO	YES	YES	666	257	3.63119	3.96294	3.34431	4.64992	3.87102	3.65738	4.05944	3.64615	0.750907		0.303797
MGI:108109	YWHAG	NO	YES	YES	1483	1264	4.57676	4.58291	3.87107	5.42324	4.63474	4.86496	4.97432	4.34358	0.645847		0.130781
MGI:107384	DNM1	NO	YES	YES	2384	1993	4.99004	4.8823	5.51536	4.79476	5.96903	5.78508	5.51629	5.12923	0.76469		0.402531
MGI:1347345	HOMER1	NO	YES	YES	131	1759	5.50222	5.35049	5.96427	3.30961	3.60406	4.25568	3.72312	5.60566	3.68724	+	0.00492753
MGI:88107	ATP1A3	NO	YES	YES	1691	435	6.03682	5.90293	6.00274	5.51948	5.16056	5.6291	5.43638	5.98083	1.45847		0.0208062
MGI:97547	PFKL	NO	YES	NO	1790	1744	-5.25099	-4.10721	-5.04859	-4.85806	-0.40146	-1.48091	-2.24681	-4.80226	0.170111		0.139374
MGI:98797	TPI1	NO	YES	NO	2062	2026	-2.91745	-0.891682	-3.08213	0.292478	-0.318849	0.117534	0.0303876	-2.29708	0.199233		0.0329079
MGI:96763	LDHB	NO	YES	NO	1420	1203	-2.64783	-2.2985	-3.63595	2.52163	1.67559	1.18391	1.79371	-2.86076	0.0397067	+	0.00114044
MGI:107953	KLC2	NO	YES	NO	677	2256	-1.86102	-2.92787	-2.93747	-1.67909	-0.879255	-0.890188	-1.14951	-2.57545	0.372176		0.0326907
MGI:99517	HSPA1B	NO	YES	NO	1712	1666	-1.91134	-2.75847	-1.29669	2.44718	2.93366	2.2091	2.52998	-1.98883	0.0436217	+	0.000678096
MGI:1923959	ARPC2	NO	YES	NO	179	2196	-0.775294	-0.445103	-0.963625	-0.0316582	-0.534465	-1.22218	-0.596101	-0.728007	0.912625		0.743984
MGI:98759	TJP1	NO	YES	NO	1342	2417	-0.623865	-0.45896	-0.467807	-1.46135	-0.632456	-1.36106	-1.15162	-0.516877	1.55266		0.0759355
MGI:2135609	LIN7A	NO	YES	NO	205	1661	-0.441524	0.0353851	-0.806436	-0.0674081	-1.22137	-0.68917	-0.659316	-0.404192	1.19344		0.570213
MGI:1861437	GSK3B	NO	YES	NO	919	549	-1.17134	0.161523	0.15066	0.750307	-0.134312	-1.19102	-0.191674	-0.286387	0.936459		0.90096
MGI:1927243	RALA	NO	YES	NO	1379	513	0.29434	0.304586	-0.99698	1.07857	0.294767	0.34691	0.573415	-0.132685	0.612975		0.23135
MGI:97597	PRKCG	NO	YES	NO	252	436	-1.34012	0.509759	-0.289143	-0.972228	1.08436	0.134893	0.0823426	-0.373167	0.729252		0.599569
MGI:1928375	ARPC3	NO	YES	NO	180	534	-0.042297	0.0089413	0.108703	0.0154904	0.701404	-1.10909	-0.130732	0.0251156	1.11408		0.783185
MGI:2385311	DLAT	NO	YES	NO	670	946	0.224706	0.532912	0.705333	0.0726931	0.788215	-0.117719	0.24773	0.487651	1.18093		0.481557
MGI:1346866	MAP2K1	NO	YES	NO			-0.111633	0.756874	0.646241	1.50337	1.49072	2.22724	1.74044	0.430494	0.403336
MGI:105922	RPL13	NO	YES	NO	2075	1094	0.304481	0.354504	0.31707	-0.328976	-1.29115	-2.19399	-1.27137	0.325352	3.02455		0.0413848
MGI:98073	RPL7	NO	YES	NO	955	1381	1.0638	0.874976	-0.102713	-1.0116	-0.153622	-1.4543	-0.873176	0.612019	2.79955		0.0476002
MGI:104581	GNB4	NO	YES	NO	429	1372	-0.960609	0.910864	0.561806	0.821504	1.17943	0.500389	0.833773	0.170687	0.631526		0.336111
MGI:107494	MYL12B	NO	YES	NO	1028	50	1.7041	-0.133878	0.486764	2.02205	2.49116	1.3603	1.95784	0.685661	0.414035		0.114277
MGI:1926080	SLC25A12	NO	YES	NO	1879	1348	2.42547	0.50536	0.553069	1.20359	0.504052	0.25556	0.654401	1.1613	1.42099		0.505054
MGI:1858257	MPP2	NO	YES	NO	1392	546	0.9244	1.02957	1.28836	-0.873537	-1.07935	0.321877	-0.543669	1.08078	3.08323		0.0225621
MGI:1890773	ACTN4	NO	YES	NO	469	329	1.0384	0.685237	1.10498	-0.565013	-0.259405	-1.19729	-0.673904	0.942874	3.06689		0.00610758
MGI:1926334	PPP2R1A	NO	YES	NO	2153	1370	1.64061	1.98982	1.75987	0.798279	1.48068	2.65007	1.64301	1.79677	1.11246		0.793795
MGI:104872	PPP1CC	NO	YES	NO	198	1169	2.02979	2.0731	2.36874	-0.802971	-0.100633	0.20773	-0.231958	2.15721	5.23855	+	0.00166897
MGI:1349763	DPYSL2	NO	YES	NO	1523	187	2.0374	2.3977	2.45422	5.38965	5.04664	5.55214	5.32948	2.29644	0.12217	+	0.000106136
MGI:98869	TUBA1A	NO	YES	NO	1277	97	1.63706	2.53362	2.82658	1.48642	3.6263	-1.3088	1.26797	2.33242	2.09137		0.509879
MGI:109355	STX1A	NO	YES	NO	126	745	1.95707	2.6361	4.2525	2.08842	2.80218	3.29303	2.72788	2.94856	1.16528		0.787415
MGI:98397	SRC	NO	YES	NO	1767	1059	2.2474	2.73576	2.93646	0.982309	1.55632	2.47162	1.67008	2.63987	1.95856		0.113184
MGI:88355	CDH2	NO	YES	NO	1540	2234	2.44145	2.98977	1.79955	-0.687071	1.61653	1.19915	0.709538	2.41026	3.25063		0.0969817
MGI:109318	MYL6	NO	YES	NO	1810	1685	2.46797	1.44495	2.28531	3.54524	4.18626	3.83139	3.85429	2.06608	0.28953		0.00808855
MGI:95777	GNAS	NO	YES	NO	2119	366	3.04772	2.15068	2.40381	2.56616	2.14182	2.51619	2.40806	2.53407	1.09127		0.694813
MGI:1915517	SLC25A22	NO	YES	NO	114	64	2.70182	2.7295	2.6866	3.68251	2.39201	2.02115	2.69856	2.70597	1.00516		0.988954
MGI:107717	MYH9	NO	YES	NO	621	473	2.74459	2.7202	2.69953	2.64959	3.90068	2.80452	3.11826	2.72144	0.759529		0.370806
MGI:104652	CAPZB	NO	YES	NO	2187	1300	2.75188	3.28648	2.24433	2.97957	3.14584	2.95886	3.02809	2.7609	0.830936		0.432738
MGI:95639	GAP43	NO	YES	NO	528	641	3.58101	3.40399	2.05605	2.59277	3.49087	2.82539	2.96968	3.01368	1.03097		0.940247
MGI:2671987	SHANK2	NO	YES	NO	2357	1673	3.18845	2.77265	3.3766	-0.412293	0.432238	0.0807803	0.0335753	3.11256	8.45021	+	0.000528374
MGI:109192	ACTN2	NO	YES	NO	628	1755	3.24273	3.19671	3.87415	2.56392	3.20781	3.3064	3.02604	3.43786	1.33036		0.266674
MGI:97760	PRKAR2B	NO	YES	NO	2154	1097	3.63679	4.35421	4.36783	2.04763	3.01946	2.31753	2.46154	4.11961	3.15594		0.0117166
MGI:1931838	DBN1	NO	YES	NO	2318	858	4.0261	3.92862	4.85872	-0.970198	0.725587	-0.339974	-0.194862	4.27115	22.1006	+	0.00149296
MGI:97314	NEFM	NO	YES	NO	1378	1531	4.809	4.53076	4.36186	5.48466	5.75593	6.49784	5.91281	4.56721	0.39349		0.0150798
MGI:1930780	MYH10	NO	YES	NO	2303	1636	4.74385	4.95886	5.2364	3.23292	4.85437	4.42831	4.17187	4.9797	1.75058		0.185489
MGI:88276	CTNNB1	NO	YES	NO	565	561	4.78526	4.62022	4.62485	2.86109	3.91556	2.78163	3.18609	4.67678	2.81022		0.0156719
MGI:96568	INA	NO	YES	NO	66	873	4.93479	5.20729	5.08566	4.76985	6.07243	6.81649	5.88626	5.07591	0.570246		0.250341
MGI:105976	MYO5A	NO	YES	NO	2374	2410	5.2618	5.59553	5.11	3.93426	4.13251	4.38321	4.14999	5.32244	2.25394	+	0.00374434
MGI:96925	MBP	NO	YES	NO	1354	1076	5.96577	5.34316	5.17706	7.4043	5.67574	6.00167	6.36057	5.49533	0.548955		0.211356
MGI:1201780	ATP6V1A	NO	YES	NO	271	1821	5.41454	5.42977	5.50978	4.51802	4.97592	5.002	4.83198	5.45136	1.53622		0.0179438
MGI:98331	SNAP25	NO	YES	NO	375	556	6.30434	5.7887	5.32938	5.76019	5.70785	6.26628	5.91144	5.80747	0.930472		0.770597
MGI:95784	GNB2	NO	YES	NO	124	962	6.25076	6.61203	6.79045	5.51695	5.29335	5.53686	5.44905	6.55108	2.14656	+	0.00338188
MGI:95781	GNB1	NO	YES	NO	844	394	6.13546	6.80321	7.2542	6.67191	6.62475	6.42723	6.57463	6.73096	1.11444		0.663658
MGI:109547	DNM2	NO	NO	YES	1279	2233	-3.1592	-1.68867	-0.440855	-0.431436	-0.484908	0.422749	-0.164531	-1.76291	0.330248		0.129415
MGI:99846	GDI1	NO	NO	YES	357	1518	-2.36987	-0.36342	-2.28992	3.48607	3.79421	4.0544	3.77823	-1.6744	0.0228347	+	0.00128423
MGI:1306776	MAP1A	NO	NO	YES	642	1836	-1.9385	-1.81029	-1.79328	-1.25727	-2.4289	-3.9678	-2.55132	-1.84735	1.62898		0.421177
MGI:1306778	MAP1B	NO	NO	YES	311	2397	-0.776461	-0.724448	-2.29052	1.27012	0.728201	-0.123637	0.624895	-1.26381	0.270049		0.0447454
MGI:1862037	SLC12A5	NO	NO	YES	1680	1994	-0.823247	-1.31086	-1.34917	-2.04754	-2.70657	-1.83848	-2.19753	-1.16109	2.05116		0.029203
MGI:1354961	SYNJ1	NO	NO	YES	1797	2379	-1.10246	-0.703552	-1.10472	-0.481853	-0.676441	-0.114106	-0.424133	-0.970246	0.684863		0.0616285
MGI:109482	CACNA1A	NO	NO	YES	425	1833	-0.926441	-1.31095	-0.292593	-2.02744	-2.02381	-4.0634	-2.70489	-0.843327	3.634		0.0659746
MGI:1277113	PACS1	NO	NO	YES	1835	1502	-0.402859	-0.899493	-0.418101	-1.99518	-1.6385	-1.12244	-1.58537	-0.573484	2.01655		0.0283397
MGI:1891917	YWHAB	NO	NO	YES	1348	1263	1.91266	1.63458	1.14746	2.12049	2.28652	2.17923	2.19541	1.5649	0.645947		0.0511023
MGI:891963	YWHAQ	NO	NO	YES	584	1831	1.51552	1.85333	1.27467	2.64423	1.92725	2.171	2.24749	1.54784	0.61572		0.060108
MGI:88106	ATP1A2	NO	NO	YES	116	1869	1.50009	0.902955	1.67203	1.55971	0.983394	1.07061	1.20457	1.35836	1.11248		0.628634
MGI:102788	RPH3A	NO	NO	YES	1003	105	1.59943	2.28644	2.70405	2.41825	1.64544	2.42484	2.16285	2.19664	1.0237		0.938726
MGI:104653	ATP2B1	NO	NO	YES	678	2107	1.86171	1.97843	2.15236	1.28668	0.959346	1.44305	1.22969	1.9975	1.70268		0.00976975
MGI:87919	ADD2	NO	NO	YES	631	1517	1.98357	2.1615	1.91654	2.58347	1.9827	2.25172	2.27263	2.02053	0.839675		0.252059
MGI:88543	CSNK2A1	NO	NO	YES	550	1828	2.79814	2.46968	2.24676	-1.74629	1.47763	0.688347	0.139896	2.50486	5.15139		0.0739543
MGI:87918	ADD1	NO	NO	YES	630	875	2.82712	2.66459	2.42652	2.9339	3.12033	2.88601	2.98008	2.63941	0.789676		0.0671103
MGI:99917	SLC1A3	NO	NO	YES	513	182	3.402	3.04677	3.46862	1.73742	2.29597	1.34863	1.79401	3.3058	2.85163		0.0076813
MGI:1099446	SYNPO	NO	NO	YES	1966	1850	3.49645	3.03374	4.26046	2.99035	3.74139	2.70345	3.14507	3.59688	1.36776		0.393518
MGI:1313277	VAMP2	NO	NO	YES	2145	1210	4.74495	4.06136	3.58127	2.47969	3.48869	2.6693	2.87923	4.12919	2.37835		0.0525189
MGI:1919020	AP2B1	NO	NO	YES	2289	362	5.09073	5.0457	5.68931	4.2845	4.56512	4.32315	4.39092	5.27525	1.8459		0.0171635
MGI:1933179	SRCIN1	NO	NO	YES	1900	2389	5.44844	5.31879	5.02397	2.66945	2.45106	2.81882	2.64644	5.26373	6.13596	+	9.19799e-05
MGI:87994	ALDOA	NO	NO	YES	2076	1012	6.12969	6.25881	6.54887	5.56691	6.08477	6.46349	6.03839	6.31246	1.20921		0.395035
MGI:1335094	SEPT7	NO	NO	YES	1022	1098	7.57353	7.45713	7.26443	6.9639	7.46631	6.89414	7.10812	7.4317	1.25143		0.183592
MGI:1927152	SYNE1	NO	NO	NO	1517	1794	-7.90461	-7.23217	-9.38146	-9.32826	-8.08743	-8.8183	-8.74466	-8.17275	1.4865		0.477034
MGI:1924210	BCAS1	NO	NO	NO	811	2421	-5.49504	-7.42846	-6.8699	-0.5698	0.385207	-3.68935	-1.29131	-6.5978	0.025269		0.0174217
MGI:1926079	TSC22D4	NO	NO	NO	2353	2356	-4.19125	-7.5723	-5.77847	-2.28803	-3.80563	-3.67338	-3.25568	-5.84734	0.165895		0.0762861
MGI:1353598	MAPK8IP3	NO	NO	NO	129	359	-1.80349	-1.04272	-2.23228	0.991588	-0.670346	2.19608	0.839108	-1.69283	0.172906		0.048284
MGI:1354953	MAGI2	NO	NO	NO	1836	1703	-6.61861	-5.02618	-4.072	-3.83406	-3.72436	-4.71145	-4.08996	-5.23893	0.450947		0.227048
MGI:2429765	DOCK1	NO	NO	NO	512	2263	-4.99403	-4.93525	-6.05121	-2.28878	-3.64112	-3.27767	-3.06919	-5.32683	0.209114		0.0141622
MGI:2685817	HECW2	NO	NO	NO	563	1899	-5.34952	-4.87892	-4.80112	-5.01743	-5.43163	-4.49571	-4.98159	-5.00985	0.980602		0.933956
MGI:104976	DDX6	NO	NO	NO	957	83	-5.2751	-6.56623	-2.928	-0.218635	0.132448	0.303121	0.0723114	-4.92311	0.0313494		0.00971301
MGI:107978	KLC1	NO	NO	NO	638	1792	-4.69823	-4.78008	-5.59697	-3.66939	-4.32609	-2.69715	-3.56421	-5.02509	0.363271		0.0575783
MGI:1920196	LRRC47	NO	NO	NO	1224	917	-5.81147	-4.68583	-4.07428	-2.04744	-1.35242	-1.62497	-1.67494	-4.85719	0.110166	+	0.00435941
MGI:108391	KIF1A	NO	NO	NO	2167	2147	-4.85768	-4.61153	-5.37962	-2.3647	-2.00923	-1.68883	-2.02092	-4.94961	0.131334	+	0.000608585
MGI:96892	LYN	NO	NO	NO	952	1237	-5.06418	-5.05137	-5.06375	-2.75714	-4.39753	-2.88194	-3.34554	-5.05977	0.304765		0.0313375
MGI:96828	LRP1	NO	NO	NO	652	339	-5.21389	-4.39076	-3.52209	-1.08492	-3.62805	-3.28848	-2.66715	-4.37558	0.305992		0.141657
MGI:97178	MAP4	NO	NO	NO	1903	1827	-5.00457	-4.36009	-3.77108	-1.46443	-2.13672	-1.78697	-1.79604	-4.37858	0.166947	+	0.00312148
MGI:2179061	PLXNA4	NO	NO	NO	1191	1011	-4.83125	-4.61127	-4.85867	-4.46952	-3.7268	-2.96648	-3.72093	-4.76706	0.484265		0.0765966
MGI:99782	NT5E	NO	NO	NO	329	439	-4.96578	-4.08524	-5.00397	-2.57539	-2.70959	-3.79696	-3.02731	-4.685	0.316948		0.0276246
MGI:1915265	TRAP1	NO	NO	NO	956	781	-5.65548	-4.33323	-4.99211	-2.37096	-2.62826	-2.30563	-2.43495	-4.99361	0.169733	+	0.00290533
MGI:2145950	SCRIB	NO	NO	NO	1944	662	-4.96662	-3.81551	-4.90465	-3.60427	-3.13033	-2.47682	-3.07047	-4.56226	0.355572		0.0397707
MGI:95834	PDIA3	NO	NO	NO	809	1233	-3.88134	-4.25303	-4.74784	-0.797202	-0.356643	-0.558952	-0.570932	-4.29407	0.0757224	+	0.000188629
MGI:2145043	KIAA0284	NO	NO	NO	1276	1733	-6.47986	-4.03421	-3.52715	-4.65085	-3.8358	-4.1964	-4.22769	-4.68041	0.730664		0.655763
MGI:1337062	AP3S1	NO	NO	NO	502	1505	-3.57404	-4.02257	-5.29535	-2.79792	-1.69602	-3.4547	-2.64955	-4.29732	0.319132		0.0861577
MGI:97804	PTN	NO	NO	NO	1958	547	-4.06162	-4.66374	-4.66479	-1.79461	-4.87197	-2.95895	-3.20851	-4.46338	0.419031		0.243978
MGI:1891808	TOLLIP	NO	NO	NO	1105	887	-3.7071	-4.16514	-4.62117	-2.80737	-2.61716	-2.35473	-2.59309	-4.16447	0.336485	+	0.00595625
MGI:103147	DYNC1H1	NO	NO	NO	2058	368	-4.42721	-4.9691	-2.91875	-2.86246	-3.88723	-5.0596	-3.93643	-4.10502	0.88971		0.857831
MGI:1344375	PRKRA	NO	NO	NO	662	2064	-4.41508	-5.26366	-3.29544	-0.2269	-0.985309	-1.47715	-0.896452	-4.32473	0.0928937		0.00712675
MGI:88475	COX5B	NO	NO	NO	682	243	-4.20561	-4.8368	-4.59093	-1.98167	-1.54179	-2.46356	-1.99567	-4.54444	0.170901	+	0.00140154
MGI:105941	MPP1	NO	NO	NO	1311	911	-4.39884	-2.74643	-5.01878	0.935887	-1.32178	-1.09532	-0.49374	-4.05468	0.0847323		0.022636
MGI:2147627	YARS	NO	NO	NO	247	1411	-3.54057	-4.18863	-4.51379	-2.84604	-3.55262	-2.04936	-2.81601	-4.081	0.416102		0.0717622
MGI:1920992	LIMA1	NO	NO	NO	312	134	-4.23389	-4.53984	-4.02068	-2.78123	-0.646562	-2.25538	-1.89439	-4.2648	0.19339		0.0228807
MGI:97838	EPRS	NO	NO	NO	458	1647	-3.8196	-4.48068	-4.3938	-2.88012	-3.25336	-4.09485	-3.40945	-4.23136	0.565691		0.11861
MGI:2663511	REPS2	NO	NO	NO	1850	1285	-4.02633	-3.71947	-4.44113	-3.42546	-1.62203	-2.9226	-2.6567	-4.06231	0.377458		0.0713698
MGI:1920081	DHX30	NO	NO	NO	1954	613	-4.16042	-5.15942	-3.51317	-3.09972	-4.37974	-4.61338	-4.03095	-4.27767	0.842809		0.73184
MGI:1098268	KIF5B	NO	NO	NO	443	2101	-4.15257	-3.54421	-4.55843	-2.33401	-2.72181	-2.71308	-2.58963	-4.08507	0.354674		0.00962517
MGI:2143230	PHLDB1	NO	NO	NO	1967	1551	-2.42767	-3.61551	-5.56528	-2.66797	-2.36488	-4.29608	-3.10964	-3.86949	0.590561		0.525442
MGI:1349762	DPYSL3	NO	NO	NO	2369	443	-4.08305	-3.28343	-4.5679	0.936688	0.550967	1.46419	0.983948	-3.97812	0.0320825	+	0.000413841
MGI:2152938	SRGAP3	NO	NO	NO	1389	1542	-4.31943	-3.58436	-1.47888	-3.32645	-3.02329	-2.62182	-2.99052	-3.12756	0.909383		0.883178
MGI:2143424	C3orf39	NO	NO	NO	1231	1588	-4.04672	-3.60639	-3.6492	-2.81423	-2.90711	-2.68351	-2.80161	-3.76744	0.511987	+	0.00333601
MGI:1914434	NDUFA13	NO	NO	NO	1446	1265	-4.00005	0.244776	-4.1831	-2.26705	-2.21048	-2.69685	-2.39146	-2.64613	0.838182		0.86952
MGI:1921075	KLRAQ1	NO	NO	NO	1909	1351	-3.49994	-5.60001	-4.15673	-3.19334	-2.74811	-5.27813	-3.73986	-4.41889	0.624584		0.532973
MGI:107685	PLXNA1	NO	NO	NO	2144	904	-3.93672	-3.52243	-3.49551	-2.66731	-1.45863	-1.64159	-1.92251	-3.65155	0.301652		0.0126689
MGI:2443306	TOM1L2	NO	NO	NO	2038	1503	-3.91347	-3.45451	-3.73956	-1.34704	-2.3006	-0.551017	-1.39955	-3.70251	0.202647		0.0116711
MGI:1916327	PSMD11	NO	NO	NO	1129	1051	-3.31436	-3.43568	-6.37849	-2.09016	-1.7791	-1.62575	-1.83167	-4.37618	0.171407		0.0655863
MGI:1924462	WIPF2	NO	NO	NO	2021	1709	-3.4588	-3.77229	-4.07957	-2.41858	-3.53716	-1.42342	-2.45972	-3.77022	0.40318		0.108501
MGI:1347098	SLC27A1	NO	NO	NO	2034	378	-4.65276	-3.39187	-3.41896	-2.31835	-3.71951	-3.93355	-3.3238	-3.8212	0.708386		0.490137
MGI:1919331	SNX12	NO	NO	NO	2022	2037	-2.95008	-3.38595	-4.92116	-1.02933	-0.972067	-2.0519	-1.3511	-3.7524	0.189294		0.0257101
MGI:1929760	CDC42EP4	NO	NO	NO	522	540	-1.6033	-3.39196	-4.04481	-1.25915	-0.839027	-2.25649	-1.45156	-3.01335	0.338729		0.137278
MGI:107422	HSPA4L	NO	NO	NO	1610	1448	-3.82557	-4.00385	-3.2843	-2.32371	-2.21362	-1.48268	-2.00667	-3.70457	0.308234		0.00762217
MGI:2385850	NOMO1	NO	NO	NO	1773	1049	-3.55673	-4.36064	-3.99447	-2.87437	-3.00141	-3.94222	-3.27267	-3.97061	0.61645		0.163248
MGI:2146320	DOCK10	NO	NO	NO	1801	1626	-3.4119	-3.26042	-4.05957	-3.54558	-2.5919	-2.82172	-2.9864	-3.5773	0.66393		0.192726
MGI:1913284	PSMD14	NO	NO	NO	791	161	-2.27391	-4.63221	-3.92203	-0.89965	-0.942086	-1.80768	-1.21647	-3.60939	0.190397		0.0343651
MGI:95401	EPB41	NO	NO	NO	1402	1761	-3.71428	-2.85393	-5.08691	2.1691	0.977108	-1.00253	0.714558	-3.88504	0.0412461		0.0152456
MGI:109279	NNT	NO	NO	NO	1816	1368	-3.10949	-3.10747	-7.2024	0.527919	-0.071521	0.226137	0.227512	-4.47312	0.0384563		0.0268483
MGI:1929214	AP3M2	NO	NO	NO	728	514	-4.56147	-2.60722	-3.72499	-0.942709	-0.304621	-0.26616	-0.504497	-3.63123	0.114488		0.00674378
MGI:98931	EZR	NO	NO	NO	2333	1577	-3.50058	-2.79856	-5.05338	-0.862952	-0.528379	-1.12051	-0.837282	-3.78417	0.129687		0.0128066
MGI:88474	COX5A	NO	NO	NO	802	395	-2.36787	-3.66304	-3.67691	-3.48933	-3.26662	-3.74999	-3.50198	-3.23594	1.2025		0.590903
MGI:95299	EIF2S1	NO	NO	NO	1443	2074	-3.45612	-3.833	-2.363	-1.64786	-2.60772	-1.70966	-1.98841	-3.21737	0.426626		0.084783
MGI:2145977	DIP2B	NO	NO	NO	2063	1595	-4.25091	-2.97752	-2.97866	-1.5788	-2.47794	-1.55028	-1.86901	-3.40237	0.345472		0.0425631
MGI:105926	RAB5A	NO	NO	NO	749	767	-3.00046	-2.97612	-4.44959	-3.04099	-6.0552	-0.312937	-3.13638	-3.47539	0.790582		0.854061
MGI:1201685	CTBP1	NO	NO	NO	442	623	-3.65365	-2.50429	-3.62659	-1.83142	-2.05757	-4.0565	-2.6485	-3.26151	0.653831		0.487285
MGI:106612	MYO1C	NO	NO	NO	369	2018	-3.07526	-2.96185	-3.61452	-5.84009	-1.6949	-4.8626	-4.13253	-3.21721	1.88599		0.510056
MGI:1098641	WASF2	NO	NO	NO	2093	1029	-3.82397	-2.9473	-2.46798	-1.66957	-1.39661	-1.8827	-1.64963	-3.07975	0.3711		0.0273923
MGI:107793	CRMP1	NO	NO	NO	2162	1396	-3.79104	-2.93755	-3.60543	-0.805575	-0.889957	-0.155571	-0.617034	-3.44467	0.140863	+	0.00124565
MGI:106015	COX7A2L	NO	NO	NO	715	237	-2.53154	-3.66617	-3.53301	-1.81738	-2.69383	-2.14692	-2.21938	-3.24357	0.491683		0.0804263
MGI:1890662	SLC9A3R2	NO	NO	NO	1868	1345	-3.33472	-2.85587	-1.99224	-0.234093	0.234638	0.221295	0.0739468	-2.72761	0.143433	+	0.00267054
MGI:1924233	SCFD1	NO	NO	NO	1189	1092	-3.32618	-3.42952	-2.95101	-2.89953	-2.51785	-2.26811	-2.56183	-3.23557	0.626879		0.045149
MGI:1194884	EVL	NO	NO	NO	1225	63	-4.52174	-2.83825	-2.69061	-3.46677	-2.06534	-0.769109	-2.1004	-3.3502	0.420507		0.269382
MGI:1923992	SNX27	NO	NO	NO	2177	116	-3.2939	-2.97359	-2.05141	-1.99549	-1.01972	-0.899525	-1.30491	-2.77297	0.361469		0.0448383
MGI:104563	NAPA	NO	NO	NO	321	331	-3.45203	-2.81972	-3.15289	-2.84316	-1.6321	-2.85724	-2.44416	-3.14155	0.61669		0.192329
MGI:1917173	AGK	NO	NO	NO	616	169	-5.60295	-2.80516	0.322492	0.0929126	-3.85333	-3.27343	-2.34461	-2.69521	0.784261		0.875959
MGI:107283	RAB6B	NO	NO	NO	750	1705	-3.2736	-2.26093	-3.84877	0.193121	-0.20243	-0.831266	-0.280192	-3.12777	0.138929		0.00669145
MGI:1341872	TJP2	NO	NO	NO	137	1520	-3.12333	-3.63097	-3.44661	-2.3534	-3.3202	-2.63382	-2.76914	-3.4003	0.645655		0.122584
MGI:1859251	DCTN3	NO	NO	NO	464	1597	-1.35966	-3.6819	-3.44489	-1.142	-1.07418	-1.69483	-1.30367	-2.82882	0.347443		0.116436
MGI:1914514	NDUFB8	NO	NO	NO	922	1751	-1.07637	-2.74763	-5.07158	0.0906973	-0.705774	-2.0164	-0.877158	-2.96519	0.235201		0.186504
MGI:106271	MAPRE2	NO	NO	NO	2418	2383	-4.58256	-2.72572	-3.02446	0.960871	0.353392	1.59142	0.96856	-3.44424	0.0469476	+	0.00286934
MGI:106054	PSMC1	NO	NO	NO	392	814	-2.90689	-3.1969	-3.38876	-3.41182	-1.81336	-1.94154	-2.3889	-3.16418	0.584276		0.21847
MGI:106039	DTNA	NO	NO	NO	57	1056	-3.19021	-2.84735	-2.35617	-1.81648	-1.30145	-2.74784	-1.95526	-2.79791	0.557616		0.159007
MGI:1349390	PCLO	NO	NO	NO	1951	1103	-3.6401	-2.70798	-2.64785	-4.71424	-4.73373	-7.08058	-5.50952	-2.99864	5.69964		0.0416138
MGI:1337060	AP3S2	NO	NO	NO	804	469	-2.05224	-2.9684	-3.36439	-2.44682	-2.65817	-2.75431	-2.61977	-2.79501	0.885618		0.683232
MGI:107689	KIF3A	NO	NO	NO	42	1390	-3.16253	-2.51456	-3.51098	-2.97161	-1.8817	-3.43974	-2.76435	-3.06269	0.813185		0.61391
MGI:1098229	KIF17	NO	NO	NO	42	1390	-3.16253	-2.51456	-3.51098	-2.97161	-1.8817	-3.43974	-2.76435	-3.06269	0.813185		0.61391
MGI:99218	CDH4	NO	NO	NO	763	736	-2.92339	-2.67372	-4.07043	-3.14495	-2.97238	-2.08469	-2.734	-3.22251	0.712762		0.417703
MGI:1336997	LANCL1	NO	NO	NO	201	742	-3.1424	-3.02484	-2.36056	0.424193	-1.61067	0.208789	-0.325896	-2.8426	0.174741		0.0217971
MGI:1923760	TRAPPC9	NO	NO	NO	1281	1917	-3.07917	-3.14675	-2.62645	-2.89696	-4.16716	-3.23748	-3.43387	-2.95079	1.39772		0.30732
MGI:99431	ARF1	NO	NO	NO	1321	1026	-0.599314	-2.60395	-5.06138	0.75569	0.564194	-1.21452	0.03512	-2.75488	0.144586		0.123711
MGI:105089	HSD17B4	NO	NO	NO	633	1615	-3.15736	-2.5981	-2.95145	-0.403938	-0.18526	-2.14978	-0.912994	-2.9023	0.25186		0.036389
MGI:1914915	DCTN4	NO	NO	NO	2143	1444	-3.28296	-2.59788	-2.35351	-5.0286	-1.44361	-1.65854	-2.71025	-2.74479	0.976346		0.978305
MGI:99256	HDLBP	NO	NO	NO	702	486	-2.50078	-2.56622	-5.17756	-1.726	-0.848187	-0.60808	-1.06076	-3.41485	0.19559		0.0673601
MGI:1913944	UQCRFS1	NO	NO	NO	861	808	-2.19509	-2.54771	-5.59834	-3.71947	-5.39301	-2.12432	-3.7456	-3.44705	1.22991		0.845306
MGI:1931834	NCKIPSD	NO	NO	NO	322	2019	-3.00345	-3.0117	-2.35069	-2.61923	-1.47569	-2.06051	-2.05181	-2.78861	0.600068		0.136422
MGI:94907	DMWD	NO	NO	NO	2321	2358	-2.4781	-2.52019	-3.6867	-2.43661	-3.30501	-2.4627	-2.73477	-2.89499	0.894887		0.75916
MGI:1913906	EEF1D	NO	NO	NO	734	326	-2.94899	-4.26082	-3.17656	-2.19602	-1.8719	-2.53871	-2.20221	-3.46212	0.417569		0.0482556
MGI:1924750	PPFIA1	NO	NO	NO	1181	2396	-4.02572	-2.5111	-1.65568	-4.29725	-4.198	-3.63728	-4.04418	-2.73083	2.48517		0.143353
MGI:96912	MAG	NO	NO	NO	841	1240	-2.98297	-3.95404	-2.82218	-1.78003	-3.49822	-4.02299	-3.10041	-3.25306	0.899594		0.85139
MGI:88057	APOE	NO	NO	NO	685	1526	-2.59433	-2.49701	-3.73663	-1.69939	-1.12957	-1.72673	-1.51857	-2.94266	0.372654		0.0324526
MGI:104750	NRCAM	NO	NO	NO	1802	1639	-2.96739	-3.03137	-2.74243	-2.40432	-2.15266	-1.31866	-1.95855	-2.91373	0.515778		0.0481806
MGI:1931027	STX12	NO	NO	NO	1772	119	-1.9081	-2.9638	-3.13862	-2.20069	-3.29564	-3.48141	-2.99258	-2.67017	1.25042		0.592085
MGI:1335107	CYTH3	NO	NO	NO	473	1306	-2.7932	-3.21679	-3.11781	-1.31536	-2.21677	-0.716922	-1.41635	-3.0426	0.323929		0.0231725
MGI:2385189	RAP1GDS1	NO	NO	NO	2170	1377	-3.78482	-2.18155	-3.0921	-0.511482	-0.230611	1.10307	0.120326	-3.01949	0.113455		0.00994318
MGI:1339639	OGT	NO	NO	NO	2173	2329	-2.89297	-3.60521	-2.79351	0.841891	-0.216251	-0.46149	0.0547166	-3.09723	0.112504	+	0.00266836
MGI:1100869	AP3B2	NO	NO	NO	204	1863	-2.87549	-2.39519	-2.40253	0.0237442	-0.811207	-0.531856	-0.439773	-2.55774	0.230372	+	0.00192655
MGI:1890467	VPS35	NO	NO	NO	606	108	-2.83637	-3.17411	-2.18813	-1.27681	0.0503029	-1.18803	-0.804847	-2.73287	0.262789		0.0202952
MGI:96916	MAOB	NO	NO	NO	1743	1121	-2.82548	-3.16448	-2.82266	-1.86497	1.13895	0.465793	-0.086745	-2.93754	0.13862		0.03593
MGI:1330826	ATP9A	NO	NO	NO	775	256	-3.11261	-2.34758	-2.45049	-2.32079	-2.92517	-3.46421	-2.90339	-2.63689	1.20289		0.54935
MGI:1914963	DNAJC19	NO	NO	NO	1702	2144	-1.56127	-3.78655	-3.01003	1.3447	-2.4203	-0.666958	-0.580854	-2.78595	0.21687		0.157066
MGI:1923520	FAM49B	NO	NO	NO	1698	433	-2.64929	-2.33906	-3.17401	0.891051	0.493234	-0.0531647	0.443707	-2.72079	0.11153	+	0.000988815
MGI:3036247	LMTK2	NO	NO	NO	1374	871	-1.741	-2.38162	-2.9943	-3.80847	-4.48647	-5.37812	-4.55769	-2.37231	4.54845		0.0197452
MGI:1918982	VPS11	NO	NO	NO	2429	1213	-2.77847	-3.19252	-1.11268	-1.51645	-2.74802	-2.30117	-2.18854	-2.36122	0.887195		0.824738
MGI:1924823	VPS33A	NO	NO	NO	1092	848	-2.8806	-2.27583	-2.6772	-1.98984	-2.6684	-2.0367	-2.23165	-2.61121	0.768671		0.249324
MGI:101924	SLC12A2	NO	NO	NO	720	856	-2.72152	-3.16042	-2.48347	-0.885501	-4.56327	-2.66819	-2.70565	-2.78847	0.944211		0.942568
MGI:97749	PPIA	NO	NO	NO	1994	2096	-1.7948	-3.1069	-2.89348	2.08501	3.05348	2.37512	2.50454	-2.59839	0.0290981	+	0.000509666
MGI:1923396	STX16	NO	NO	NO	738	1119	-2.63084	-3.1001	-2.88729	-4.76819	-5.73984	-3.76466	-4.75756	-2.87274	3.69307		0.0324121
MGI:103249	CALM3	NO	NO	NO	1097	2283	-2.69387	-3.91121	-1.35862	-0.656783	0.00561273	-0.390962	-0.347377	-2.65457	0.202053		0.0388397
MGI:103250	CALM2	NO	NO	NO	1097	2283	-2.69387	-3.91121	-1.35862	-0.656783	0.00561273	-0.390962	-0.347377	-2.65457	0.202053		0.0388397
MGI:2388662	PLEKHA6	NO	NO	NO	260	1325	-2.69005	-2.71137	-2.16104	-1.73384	-1.25687	-1.17692	-1.38921	-2.52082	0.456406		0.0106419
MGI:894291	ACSL6	NO	NO	NO	2225	2145	-3.00841	-2.19703	-2.54264	-1.48562	-1.79984	-2.5163	-1.93392	-2.58269	0.637821		0.167309
MGI:1354721	SLC25A13	NO	NO	NO	248	865	-2.29668	-2.17177	-5.71293	-0.640033	-2.46308	-2.65734	-1.92015	-3.39379	0.360072		0.328769
MGI:1933169	SACM1L	NO	NO	NO	706	62	-2.82256	-2.11425	-2.01855	-5.32413	-1.70521	-0.707933	-2.57909	-2.31845	1.19801		0.863783
MGI:1917799	TLN2	NO	NO	NO	1423	1208	-1.4503	-4.59188	-2.76594	-0.184909	1.33636	0.616901	0.589451	-2.93604	0.0868401		0.0252123
MGI:104967	GLG1	NO	NO	NO	1979	445	-2.19999	-2.10231	-2.79508	-2.79453	-2.93297	-2.97002	-2.89917	-2.36579	1.44731		0.0749984
MGI:97816	PTPRZ1	NO	NO	NO	2263	2153	-2.56275	-3.29383	-1.86066	-1.08386	-0.39021	-0.848791	-0.774288	-2.57241	0.287548		0.0175547
MGI:2385112	NDUFS2	NO	NO	NO	808	618	-1.6781	-2.08788	-4.00023	-1.98571	-2.45112	-2.045	-2.16061	-2.58874	0.743226		0.589246
MGI:1914318	DYNLRB1	NO	NO	NO	1262	1422	-1.99297	-2.75461	-2.7328	0.515803	-1.26198	0.454105	-0.097357	-2.49346	0.189977		0.0194556
MGI:1276121	BCKDK	NO	NO	NO	1073	212	-2.5381	-2.30026	-2.19793	-1.80196	-2.18869	-1.75822	-1.91629	-2.34543	0.742704		0.0649434
MGI:97887	RDX	NO	NO	NO	2398	2183	-1.87129	-3.993	-2.72368	-0.612414	-1.55419	-2.8301	-1.66557	-2.86266	0.436154		0.250011
MGI:97167	MSN	NO	NO	NO	1426	91	-2.3383	-2.13309	-2.721	2.05033	2.76073	2.12047	2.31051	-2.39746	0.0382612	+	7.77625e-05
MGI:1923020	BRSK2	NO	NO	NO	908	2012	-2.51263	-2.28389	-2.66242	-5.02213	-3.64626	-3.951	-4.20646	-2.48631	3.2947		0.0163116
MGI:1914683	CCDC127	NO	NO	NO	1063	749	-0.527125	-2.16487	-2.68248	-0.673994	-1.26714	-4.71223	-2.21779	-1.79149	1.34378		0.778467
MGI:1913666	NDUFA7	NO	NO	NO	2045	693	-2.02429	-2.01552	-3.29921	-2.40797	-0.943278	-1.48315	-1.61146	-2.44634	0.560632		0.239029
MGI:1914047	CNTNAP2	NO	NO	NO	933	1867	-1.40201	-2.01516	-3.48866	-2.46354	-3.01627	-4.57244	-3.35075	-2.30194	2.06882		0.301247
MGI:99434	ARF5	NO	NO	NO	1323	1027	-1.33083	-2.00889	-2.97724	-1.65541	-2.77836	-2.6903	-2.37469	-2.10565	1.205		0.676344
MGI:1330304	VPS52	NO	NO	NO	1195	2131	-2.29421	-2.44793	-2.63939	-2.05787	-0.603137	-1.05812	-1.23971	-2.46051	0.429043		0.0504515
MGI:1338049	ITSN2	NO	NO	NO	1910	661	-1.81562	-2.41917	-2.62938	-3.93974	-4.00329	-3.9243	-3.95577	-2.28805	3.17712	+	0.00243689
MGI:99476	ABHD16A	NO	NO	NO	1024	694	-2.43412	-1.15234	-2.737	-1.34946	-0.819097	-0.405365	-0.857975	-2.10782	0.420493		0.0883414
MGI:1920428	WASL	NO	NO	NO	412	2038	-2.18459	-2.2524	-2.58269	-1.28385	-1.7173	-0.351611	-1.11759	-2.33989	0.428598		0.0440486
MGI:2142527	EXOC8	NO	NO	NO	904	1695	-2.38162	-1.43454	-2.6909	-2.02401	-1.19475	-1.01775	-1.41217	-2.16902	0.591788		0.196534
MGI:1298393	SH3PXD2A	NO	NO	NO	1924	1329	-2.3625	-2.57727	-2.29616	-5.27758	-6.41118	-4.73733	-5.47536	-2.41198	8.35932	+	0.00360775
MGI:1347351	NCDN	NO	NO	NO	2156	1594	-2.34423	-0.802757	-2.76211	0.424996	1.76647	1.12852	1.10666	-1.9697	0.118556		0.0123621
MGI:1927234	SUCLG1	NO	NO	NO	2368	1812	-3.1407	-1.35693	-2.51891	0.939541	-1.01205	-1.59853	-0.557012	-2.33885	0.290813		0.127367
MGI:891965	VPS45	NO	NO	NO	1100	516	-2.31878	-2.14593	-2.31125	1.4498	2.69547	2.0856	2.07696	-2.25865	0.049528	+	0.000284641
MGI:1349635	SEC23A	NO	NO	NO	570	483	-2.50078	-1.84139	-1.95267	-2.5099	-0.138448	-1.68747	-1.44527	-2.09828	0.635954		0.41836
MGI:1098244	AP1S1	NO	NO	NO	1156	304	-2.27454	-2.48246	-2.49398	-0.438828	0.16007	-0.0762454	-0.118335	-2.41699	0.203252	+	0.000257943
MGI:98817	HSP90B1	NO	NO	NO	866	669	-1.82881	-3.81182	-2.47951	-0.913627	-2.15754	-1.82429	-1.63182	-2.70671	0.474706		0.195286
MGI:97775	PRPS1	NO	NO	NO	1439	2400	-4.69739	-1.81292	-0.946809	-2.36925	-1.57153	-2.76569	-2.23549	-2.48571	0.84077		0.843334
MGI:1339975	PAK1	NO	NO	NO	2224	793	-2.26882	-1.21384	-2.6268	0.495821	0.470622	1.00797	0.658139	-2.03649	0.154467	+	0.00419873
MGI:95752	GLS	NO	NO	NO	1533	1990	-3.27136	-1.79081	-2.26379	-0.626349	-0.833029	-0.305982	-0.588453	-2.44199	0.276714		0.0160542
MGI:2444531	RALGAPB	NO	NO	NO	1934	1840	-2.25543	-2.77611	-0.339489	-4.48947	-3.47056	-5.00845	-4.32283	-1.79034	5.78567		0.0433006
MGI:1350922	CADPS	NO	NO	NO	1634	1547	-2.28509	-1.76356	-2.33064	-0.842977	-0.640683	-0.0843648	-0.522675	-2.12643	0.329019	+	0.00527234
MGI:1349438	MPRIP	NO	NO	NO	1197	1809	-2.2245	-2.31832	-2.08653	-0.192651	-1.24629	-0.526802	-0.655249	-2.20978	0.340439		0.00811751
MGI:1915444	NDUFB4	NO	NO	NO	1458	766	-1.19787	-1.76501	-2.41024	-1.4243	-1.94686	-2.37551	-1.91556	-1.79104	1.09014		0.793633
MGI:97842	RAB1A	NO	NO	NO	200	196	-2.20443	-1.92739	-2.11219	0.946543	0	0.139114	0.361886	-2.08134	0.183872	+	0.00133558
MGI:1933736	BAI1	NO	NO	NO	710	1205	-2.19799	-2.78642	-2.39035	-4.40966	-2.67409	-4.70484	-3.92953	-2.45825	2.77267		0.0885933
MGI:95394	ENO2	NO	NO	NO	1339	1617	-1.49918	-3.18218	-2.38994	2.52076	1.47706	1.81703	1.93828	-2.3571	0.0509285	+	0.00171781
MGI:2673998	ARHGAP33	NO	NO	NO	2126	1284	-1.25801	-1.7143	-2.80254	-2.78665	-1.93799	-2.43601	-2.38688	-1.92495	1.37739		0.42464
MGI:1922656	NDUFS7	NO	NO	NO	1737	382	-1.10836	-2.91272	-2.37629	-1.73577	-2.66821	-3.59572	-2.66657	-2.13245	1.44805		0.519867
MGI:2686961	INPP5A	NO	NO	NO	1006	1073	-2.17631	-2.52584	-2.24832	-2.47512	-1.80936	-2.55045	-2.27831	-2.31682	0.973659		0.888762
MGI:1342292	HSPA4	NO	NO	NO	113	1609	-2.16524	-2.59292	-1.40725	-0.718691	0.317856	0.278424	-0.0408037	-2.05514	0.247529		0.0142195
MGI:1914502	CAP2	NO	NO	NO	872	127	-2.42435	-1.54552	-2.34072	0.882741	-0.0697946	2.1226	0.978516	-2.10353	0.11809		0.0113105
MGI:1914490	TAOK1	NO	NO	NO	89	588	-1.60737	-2.57769	-2.33661	-1.31783	-1.79989	-1.24851	-1.45541	-2.17389	0.607738		0.101648
MGI:98890	UBA1	NO	NO	NO	2198	481	-2.03701	-1.66905	-2.97289	1.2358	1.7507	2.51404	1.83351	-2.22632	0.059961	+	0.00164195
MGI:2443881	RASAL2	NO	NO	NO	237	1807	-2.14285	-2.04766	-1.91995	-3.90457	-4.18599	-3.64946	-3.91334	-2.03682	3.67188	+	0.000364528
MGI:109430	ICAM5	NO	NO	NO	1543	336	-2.14161	-3.06596	-1.21425	-4.26305	-5.02916	-4.65264	-4.64828	-2.1406	5.68704		0.0123027
MGI:106504	EFHD2	NO	NO	NO	1064	129	-1.0738	-1.66118	-3.62589	-2.82667	1.36866	0.0394166	-0.472862	-2.12029	0.319209		0.321878
MGI:2669796	RTN4RL2	NO	NO	NO	1761	1689	-2.12277	-3.03667	-1.90319	-2.64716	-1.80366	-1.50922	-1.98668	-2.35421	0.77511		0.492073
MGI:1096584	PSMD2	NO	NO	NO	426	489	-1.46891	-2.79	-2.31108	-1.48922	-1.25742	-1.29434	-1.34699	-2.19	0.557481		0.0983934
MGI:1337026	SDCBP	NO	NO	NO	1664	287	-1.76123	-1.85051	-2.29921	-0.0611286	-0.115709	-0.462827	-0.213222	-1.97032	0.295844	+	0.00108848
MGI:2385758	ABLIM2	NO	NO	NO	2017	1136	-2.94919	-1.59723	-1.8466	-2.01674	-0.337714	-0.640471	-0.998308	-2.13101	0.456062		0.162702
MGI:1859821	PRDX5	NO	NO	NO	792	667	-1.55998	-1.76435	-2.23642	-0.563237	-0.754568	-1.24841	-0.855404	-1.85358	0.500632		0.025115
MGI:1931882	DNAJA2	NO	NO	NO	1011	881	-2.46015	-1.56828	-1.47151	0.632614	-0.60305	0.336488	0.122018	-1.83331	0.257862		0.0159946
MGI:1349453	VSNL1	NO	NO	NO	1347	1252	-2.01958	-2.27825	-1.61947	0.626456	2.01877	0.731758	1.12566	-1.97243	0.116783	+	0.00312714
MGI:2429763	DOCK3	NO	NO	NO	1387	1341	-1.5494	-1.51013	-2.56656	-3.28714	-3.20655	-2.87199	-3.12189	-1.87536	2.3727		0.0276933
MGI:1924015	MLEC	NO	NO	NO	927	1389	-0.875773	-4.97673	-2.1546	1.33543	1.8117	1.57636	1.57449	-2.66904	0.0527923		0.0253414
MGI:2182619	LGI3	NO	NO	NO	1194	989	-2.39997	-1.25006	-2.15194	-1.65672	-4.58647	-2.06541	-2.76953	-1.93399	1.78453		0.442123
MGI:1920159	CHMP1A	NO	NO	NO	1846	442	-1.95841	-1.6985	-1.82666	-2.17019	-2.92759	-1.41293	-2.17024	-1.82785	1.26785		0.483318
MGI:1926235	STX6	NO	NO	NO	477	70	-1.62651	-1.45442	-2.66435	-3.09327	-2.7853	-2.16125	-2.67994	-1.91509	1.69919		0.176719
MGI:2676368	DNAJC13	NO	NO	NO	1735	2209	-2.4091	-1.44729	-1.35216	-2.1635	-1.94714	-3.49909	-2.53657	-1.73618	1.74157		0.247199
MGI:2144727	DDX1	NO	NO	NO	1587	592	-1.91613	-1.95795	-1.35064	-0.924277	-1.62528	-2.22153	-1.59036	-1.74157	0.900493		0.738777
MGI:1915229	ATAD1	NO	NO	NO	1234	38	-1.28146	-2.16832	-2.1016	-0.263424	-1.50286	-1.55213	-1.10614	-1.85046	0.596948		0.217453
MGI:96244	HSPA1A	NO	NO	NO	1712	1666	-1.91134	-2.75847	-1.29669	2.44718	2.93366	2.2091	2.52998	-1.98883	0.0436217	+	0.000678096
MGI:107811	NPTX1	NO	NO	NO	1478	567	-1.89206	-1.90607	-1.39785	-1.04079	1.41769	-1.39906	-0.340723	-1.732	0.381228		0.197396
MGI:1931874	DNAJB1	NO	NO	NO	525	882	-3.2449	-1.39796	-1.77217	1.08384	-3.31302	1.52368	-0.235168	-2.13834	0.267354		0.311382
MGI:1929813	CACNA2D2	NO	NO	NO	1943	106	-1.85659	-2.93209	-1.74292	-3.10969	-4.00134	-3.74789	-3.61964	-2.1772	2.71781		0.0355677
MGI:103009	EPB41L2	NO	NO	NO	530	1365	-1.8455	-1.74499	-1.98771	-0.871945	-2.54823	-4.0731	-2.49776	-1.8594	1.55656		0.528967
MGI:1923558	RAB1B	NO	NO	NO	313	196	-2.00423	-0.639055	-2.01672	0.946543	0	0.139114	0.361886	-1.55333	0.265132		0.0244523
MGI:106581	TSG101	NO	NO	NO	597	299	-1.60901	-1.9202	-1.99004	-2.11374	-1.3438	-1.15289	-1.53681	-1.83975	0.810597		0.392245
MGI:1921506	CYLD	NO	NO	NO	1130	1323	-1.79775	-1.03479	-2.06655	-1.36506	-1.28868	-1.09172	-1.24849	-1.63303	0.766022		0.295199
MGI:106906	EIF4A2	NO	NO	NO	1753	1778	-1.79168	-1.50815	-1.21666	1.11855	0.85471	0.839274	0.937511	-1.50549	0.1839	+	0.000207172
MGI:2180801	ATP13A1	NO	NO	NO	1034	82	-1.54338	-3.3804	-1.9609	-4.16194	-3.84993	-5.13885	-4.38357	-2.29489	4.25359		0.0369257
MGI:1926058	STXBP5	NO	NO	NO	1232	2189	-1.76459	-1.32498	-1.86826	-1.15181	-1.31553	-1.37632	-1.28122	-1.65261	0.773038		0.10737
MGI:1919746	SEC24C	NO	NO	NO	782	1202	-1.70168	-1.95747	-1.95097	-3.32462	-2.00315	-2.02323	-2.45033	-1.87004	1.49515		0.2624
MGI:1923957	CLASP1	NO	NO	NO	1905	2212	-1.7567	-1.63308	-1.47948	-1.66143	-2.7517	-2.3136	-2.24224	-1.62309	1.53598		0.131002
MGI:2658986	WASF3	NO	NO	NO	1659	627	-1.75175	-1.3982	-1.89389	-2.0969	-0.694202	-1.51042	-1.43384	-1.68128	0.84239		0.597946
MGI:1100859	CAPN5	NO	NO	NO	2193	208	-1.66532	-1.44097	-1.93747	-1.9893	-1.29348	-1.75266	-1.67848	-1.68125	0.99808		0.99167
MGI:1346035	FARSB	NO	NO	NO	1673	1515	-2.46298	-1.23291	-1.52965	-0.613364	-0.166593	-0.804562	-0.528173	-1.74185	0.431169		0.0433604
MGI:1920955	MARK4	NO	NO	NO	1640	1219	-1.70579	-1.37674	-0.794199	-3.41147	-1.4074	-2.54123	-2.45337	-1.29224	2.23631		0.143114
MGI:1927340	MPP6	NO	NO	NO	1696	507	-2.21515	-1.22424	-1.27374	-2.92806	-2.2537	-1.75181	-2.31119	-1.57104	1.67035		0.189739
MGI:1860040	TRIM3	NO	NO	NO	1147	645	-2.00144	-1.20521	-1.47699	-0.773147	-0.216251	-1.19962	-0.729672	-1.56121	0.561929		0.0869075
MGI:103149	UCHL1	NO	NO	NO	595	1409	-1.66299	-1.25091	-1.85886	3.42301	0.853833	3.47409	2.58364	-1.59092	0.0553772		0.00913359
MGI:1927230	TRIO	NO	NO	NO	2111	2108	-2.25826	-1.1874	-0.938613	-4.2118	-2.81554	-2.72436	-3.25057	-1.46142	3.4561		0.0466474
MGI:2659071	RAPGEF2	NO	NO	NO	2355	2348	-1.64872	-1.39942	-1.50803	-1.89099	-1.14094	-1.05873	-1.36356	-1.51872	0.898027		0.602008
MGI:1202388	GAS7	NO	NO	NO	1009	387	-1.64646	-1.41335	-0.443706	-2.09467	0.220599	0.434256	-0.479938	-1.16784	0.620756		0.482487
MGI:1347353	ATP2B3	NO	NO	NO	134	1287	-1.36376	-1.16583	-2.75471	-2.38148	-2.85735	-1.49191	-2.24358	-1.76143	1.39682		0.493368
MGI:96243	HSPA2	NO	NO	NO	274	1753	-1.77997	-1.16219	-0.719514	1.92275	0.900233	1.1285	1.31716	-1.22056	0.172215	+	0.0043593
MGI:2384296	CAMKV	NO	NO	NO	1708	451	-2.24673	-1.15369	-1.25671	-2.48341	-2.8024	-5.39102	-3.55895	-1.55238	4.01825		0.111147
MGI:1921353	NEBL	NO	NO	NO	1986	374	-1.70218	-1.15306	-1.05139	-0.505707	-0.100664	-0.770188	-0.458853	-1.30221	0.557345		0.0397415
MGI:97355	NME1	NO	NO	NO	842	739	-1.3711	-2.32466	-1.81316	1.54673	1.60714	0.838684	1.33085	-1.83631	0.111324	+	0.00102087
MGI:1913444	PYCRL	NO	NO	NO	2207	939	-1.66499	-1.14731	-1.38125	-0.951414	-2.33358	-1.69237	-1.65912	-1.39785	1.19854		0.57323
MGI:1349467	ABCD2	NO	NO	NO	107	1364	-0.642381	-1.12824	-2.41824	-0.777756	-0.3822	-0.580686	-0.580214	-1.39629	0.567986		0.206637
MGI:97282	NCAM2	NO	NO	NO	1838	604	-1.39922	-1.17775	-1.79105	-1.58849	-2.49093	-1.30536	-1.79493	-1.45601	1.26481		0.444469
MGI:2389180	LRRTM4	NO	NO	NO	2073	994	-2.74393	-1.11522	-1.361	-4.64919	-2.79568	0.0971257	-2.44925	-1.74005	1.6349		0.654946
MGI:1194508	DDOST	NO	NO	NO	1627	293	-1.58095	-2.03472	-0.519997	-3.46219	-1.62341	-2.20841	-2.43134	-1.37856	2.07452		0.209131
MGI:2384560	AARS	NO	NO	NO	879	1490	2.66969	-1.09138	-4.90979	-0.852145	-1.11591	-0.430337	-0.799465	-1.11049	0.806067		0.89427
MGI:1919085	LANCL2	NO	NO	NO	1021	430	-1.5626	-1.74529	-1.16668	-0.615393	-1.14984	0.275603	-0.496544	-1.49152	0.501744		0.0912498
MGI:106321	DOCK9	NO	NO	NO	1352	2395	-1.39736	-1.15787	-1.74977	-1.84534	-1.35895	-2.20917	-1.80449	-1.435	1.29189		0.286016
MGI:109153	KTN1	NO	NO	NO	1762	455	-1.55577	-1.92807	-0.919991	-1.70762	-3.19185	-2.03741	-2.31229	-1.46794	1.79546		0.19141
MGI:107686	NDUFA4	NO	NO	NO	415	563	-0.36348	-1.07914	-2.25047	1.05203	-1.54941	0.245594	-0.0839304	-1.23103	0.451532		0.291702
MGI:1351615	ADD3	NO	NO	NO	1490	1756	-1.54207	-1.7112	-1.19037	-0.277864	0.483572	-0.357005	-0.0504325	-1.48121	0.37093		0.00978004
MGI:1914172	RRAS2	NO	NO	NO	432	1534	-1.11539	-1.05177	-1.92628	2.32891	1.1613	2.19406	1.89475	-1.36448	0.104442	+	0.00216304
MGI:1349216	ABCD3	NO	NO	NO	94	864	-1.53997	-1.03971	-1.26571	0.21698	-0.929261	-0.275017	-0.329099	-1.2818	0.516665		0.0581379
MGI:107738	DYNC1LI2	NO	NO	NO	407	1878	-1.6719	-1.03692	-1.62551	0.693096	0.0201898	0.752169	0.488485	-1.44478	0.261837	+	0.00341919
MGI:107926	ROCK2	NO	NO	NO	1734	34	-1.50995	-1.11696	-1.68665	-3.16676	-1.99203	-2.12772	-2.42884	-1.43785	1.98755		0.0718101
MGI:1921455	ACSL3	NO	NO	NO	983	977	-3.38035	-1.00975	-1.42225	-0.858289	-0.744121	-0.0487495	-0.550387	-1.93745	0.382342		0.147488
MGI:1917619	BAG5	NO	NO	NO	276	1212	-1.48341	-0.647818	-1.66825	-1.12365	0.192609	1.35039	0.139782	-1.26649	0.377285		0.145971
MGI:1859607	PRAF2	NO	NO	NO	862	390	-1.46899	-1.74913	-1.6651	0.534139	0.400254	-0.763511	0.0569608	-1.62774	0.311068		0.0160225
MGI:1920198	TPPP	NO	NO	NO	450	340	-1.5955	-0.963831	-1.30274	1.15942	0.512972	1.40391	1.02543	-1.28736	0.201271	+	0.00199962
MGI:1351334	SYN3	NO	NO	NO	1655	1981	-1.43662	-1.35273	-1.59572	-0.936513	-0.016387	0.211598	-0.247101	-1.46169	0.430896		0.0274839
MGI:1917770	GLIPR2	NO	NO	NO	245	1853	-0.304441	-0.957433	-2.34673	3.45241	3.10061	3.0916	3.21487	-1.20287	0.0467873	+	0.00197485
MGI:97837	QKI	NO	NO	NO	1874	701	-1.42355	-1.60564	-1.31333	-1.2714	-2.84715	-0.72932	-1.61596	-1.44751	1.12385		0.805651
MGI:94921	DPP6	NO	NO	NO	1520	2378	-1.42304	-1.61974	-0.972672	-4.49395	-4.19967	-4.37094	-4.35485	-1.33848	8.0913	+	0.000135661
MGI:1353586	LMO7	NO	NO	NO	1931	2194	-1.62786	-0.935431	-1.59112	-0.584383	-0.785304	-1.12529	-0.83166	-1.3848	0.681533		0.114421
MGI:1914648	SRPR	NO	NO	NO	1431	363	-2	-0.90909	-0.585543	-1.99116	-3.15016	-4.24775	-3.12969	-1.16488	3.90361		0.0653026
MGI:2137681	SFXN5	NO	NO	NO	1150	1023	-1.11072	-0.926066	-1.56316	-0.651112	-1.89676	-1.72311	-1.42366	-1.19998	1.16771		0.632736
MGI:1309503	KCNQ2	NO	NO	NO	444	2076	-1.36927	-1.60526	-0.534872	-1.83844	-0.142167	-1.28024	-1.08695	-1.1698	0.944189		0.896058
MGI:107750	DYNC1I2	NO	NO	NO	1350	721	-1.36383	-1.12942	-0.665275	-0.024942	0.160844	-0.0593509	0.0255171	-1.05284	0.473568		0.0075742
MGI:1918685	ARHGAP21	NO	NO	NO	1216	2239	-1.34684	-1.62435	-1.20767	-2.02893	-1.19548	-1.1152	-1.44654	-1.39295	1.03784		0.873883
MGI:1915615	RAB14	NO	NO	NO	1568	571	-1.24344	-1.55709	-1.53327	-1.055	-2.24145	-1.76408	-1.68684	-1.4446	1.18283		0.536928
MGI:3583942	CHMP6	NO	NO	NO	1716	101	-0.794423	-2.24459	-1.51756	-1.15578	-1.62572	-1.60609	-1.46253	-1.51886	0.96171		0.905567
MGI:1330848	ATP8A1	NO	NO	NO	1010	146	-0.936304	-1.1224	-1.50745	-0.168523	-0.609922	-0.295793	-0.358079	-1.18872	0.56228		0.0176229
MGI:1261820	CAND1	NO	NO	NO	1106	2398	-1.51281	-0.82921	-1.02017	0.45398	0.13021	0.113171	0.232454	-1.12073	0.391427	+	0.00429665
MGI:95288	EEF2	NO	NO	NO	1307	2003	-1.29503	-1.88784	-1.25036	-1.33257	-1.41034	-3.66506	-2.13599	-1.47775	1.57816		0.452628
MGI:109137	RASGRF2	NO	NO	NO	771	37	-1.29031	-1.81437	-1.28645	-2.51764	-3.98596	-4.92391	-3.80917	-1.46371	5.08223		0.0313985
MGI:1891731	STUB1	NO	NO	NO	805	2067	-1.28563	-1.34994	-1.29575	-0.62571	-0.647488	-0.817295	-0.696831	-1.31044	0.65356	+	0.000652091
MGI:2387329	OLFM3	NO	NO	NO	41	958	-2.42304	-0.809724	0.277232	-0.180349	-1.61707	-0.595529	-0.797649	-0.985176	0.87811		0.843942
MGI:105068	RAB7A	NO	NO	NO	539	1835	-1.24582	-2.18553	0.139235	-0.679091	-3.05134	-2.52954	-2.08666	-1.09737	1.98521		0.372844
MGI:1338801	CYFIP1	NO	NO	NO	2196	1560	-1.23897	-1.17379	-0.507533	-1.509	-1.1657	-0.72918	-1.13463	-0.97343	1.11822		0.64578
MGI:95768	GNA13	NO	NO	NO	1551	313	-1.06508	-1.8206	-1.42364	-0.388132	-0.17645	-0.0263159	-0.196966	-1.43644	0.423527		0.00688999
MGI:3616088	OGDHL	NO	NO	NO	2191	1656	-0.200821	-1.7053	-1.42301	-0.998882	-0.389114	-1.70085	-1.02962	-1.10971	0.945997		0.899808
MGI:1918552	ARHGAP26	NO	NO	NO	285	2120	-1.21401	-1.19601	-0.918349	-1.71033	-1.08999	-2.72771	-1.84268	-1.10946	1.66235		0.206538
MGI:1891690	SYNCRIP	NO	NO	NO	1928	1810	-1.3238	-0.737466	-0.511708	-2.0252	-2.5693	-2.01101	-2.20184	-0.857656	2.53886		0.0114806
MGI:108360	ENAH	NO	NO	NO	2212	2123	-2.15868	-0.381996	-1.38142	-3.13647	-1.43684	-4.25579	-2.94303	-1.30737	3.10731		0.16616
MGI:1859252	FMN2	NO	NO	NO	2241	480	-1.06027	-1.26111	-1.37708	-0.942789	-0.799188	-0.741403	-0.827793	-1.23282	0.755223		0.0213034
MGI:1100520	TWF1	NO	NO	NO	2328	1417	-1.1766	-1.68166	-1.03847	-1.68681	-1.17609	-2.2777	-1.71353	-1.29891	1.33295		0.329224
MGI:107858	ARHGAP39	NO	NO	NO	2052	1670	-1.12689	-1.93188	-1.34946	-4.6344	-4.07983	-2.98077	-3.89833	-1.46941	5.38492		0.0109744
MGI:1922984	MFF	NO	NO	NO	790	1876	-0.494859	-0.650171	-1.50531	-0.431659	-1.56149	-0.825123	-0.939425	-0.883446	1.03956		0.908303
MGI:1916847	AFG3L2	NO	NO	NO	64	992	-0.874641	-1.26141	-1.31265	0.0227252	0.0676057	-0.833596	-0.247755	-1.14957	0.535214		0.0497206
MGI:2442356	SPECC1	NO	NO	NO	1554	1740	-0.902363	-1.76071	-1.30572	-2.74312	-3.00987	-2.31125	-2.68808	-1.32293	2.57603		0.0130983
MGI:1934835	UBE2N	NO	NO	NO	147	968	-1.71134	-0.378671	-1.30143	1.805	1.88965	1.35625	1.68363	-1.13048	0.142189	+	0.00275577
MGI:2136772	VPS16	NO	NO	NO	1717	399	-1.10916	-1.1696	0	-1.21426	-1.95025	-3.82468	-2.32973	-0.759588	2.96934		0.143714
MGI:1918012	DCLK2	NO	NO	NO	1623	1124	-1.10484	-1.22708	-0.799254	-1.44119	-0.885501	-2.29405	-1.54025	-1.04372	1.41081		0.311441
MGI:1914811	WDR48	NO	NO	NO	2228	1619	-1.10473	0.320713	-1.71347	-3.10068	-2.09355	-4.30581	-3.16668	-0.832496	5.04267		0.0566192
MGI:1346030	LY6H	NO	NO	NO	509	834	-1.07773	-0.919495	-0.949529	-2.74601	-2.50593	-2.14554	-2.46583	-0.982251	2.79641	+	0.00121001
MGI:99778	GPD2	NO	NO	NO	583	1589	-0.709631	-0.889165	-1.25461	-1.09179	-1.80966	-2.29924	-1.73356	-0.951135	1.72002		0.112295
MGI:3697726	ARHGAP23	NO	NO	NO	1113	2157	-0.364175	-0.972113	-1.25404	-2.78088	-2.05314	-2.48554	-2.43985	-0.863444	2.98226		0.00946753
MGI:1929872	MOGS	NO	NO	NO	1745	1556	-1.05716	-1.20044	-1.00418	-1.34042	-1.37839	-2.34784	-1.68888	-1.08726	1.51742		0.146785
MGI:1888676	RPS27	NO	NO	NO	1912	1001	-1.11149	-0.580761	-0.712732	0.634777	-3.82704	0.133778	-1.01949	-0.801663	1.16298		0.885524
MGI:1918006	DOCK4	NO	NO	NO	210	1069	-0.778976	-0.66999	-1.23704	-2.70538	-1.87645	-2.27432	-2.28538	-0.895334	2.62088		0.00930843
MGI:88141	BCR	NO	NO	NO	161	1728	-0.828218	-2.12652	-1.23539	-3.43086	-1.98648	-1.85633	-2.42456	-1.39671	2.03898		0.180114
MGI:1914404	MTDH	NO	NO	NO	1759	1563	-0.44406	-0.913021	-1.20408	-0.565625	-1.34409	-1.27012	-1.05995	-0.853719	1.15367		0.568698
MGI:107743	DYNC1I1	NO	NO	NO	716	720	-1.011	-0.871111	-0.685758	0.00434255	0.724191	-0.150363	0.192723	-0.855957	0.48341		0.0213201
MGI:107436	CDH10	NO	NO	NO	1608	1667	-1.0096	-0.784608	-0.932961	-1.32861	-1.42	-1.85124	-1.53328	-0.909057	1.54138		0.0230805
MGI:107745	DCTN1	NO	NO	NO	2423	2351	-0.558101	-0.659567	-1.1964	0.974194	1.20611	1.23932	1.13987	-0.804691	0.259793	+	0.000826173
MGI:2442582	ABLIM3	NO	NO	NO	1305	1989	-1.00031	-0.657536	-0.595734	-3.79749	-2.03376	-2.18347	-2.67157	-0.751193	3.78522		0.0293847
MGI:2144423	ARHGAP44	NO	NO	NO	2254	634	-0.995145	-0.974218	-0.368099	-2.80929	-1.37847	-1.84559	-2.01111	-0.779154	2.34886		0.0582992
MGI:88024	ANK1	NO	NO	NO	2220	367	-1.19751	-0.343493	-1.17896	4.45651	2.69987	1.56628	2.90755	-0.906655	0.0710901		0.0126294
MGI:102964	SRPRB	NO	NO	NO	1603	115	-0.983855	-0.622786	-1.13981	-0.265762	-1.15683	-1.23991	-0.887502	-0.915484	0.980792		0.939666
MGI:87940	ADRBK1	NO	NO	NO	431	1485	-1.83256	-0.499582	-0.397541	-2.89564	-0.696771	-3.58231	-2.39157	-0.909896	2.79273		0.207122
MGI:106379	C22orf28	NO	NO	NO	2141	267	-0.240076	-0.582044	-1.15726	-0.545234	-0.638728	-0.719838	-0.6346	-0.659795	0.982688		0.930734
MGI:107728	MYO1D	NO	NO	NO	1784	1829	-0.950903	-0.5084	-0.366819	0.403644	-2.17873	-0.0269177	-0.600669	-0.608707	0.994444		0.99263
MGI:1914545	RAB3C	NO	NO	NO	1070	1437	-0.703249	-0.475286	-2.09012	-2.0338	-2.59634	-0.292482	-1.64088	-1.08955	1.46543		0.555321
MGI:2145645	EXOC5	NO	NO	NO	2230	2235	-1.31753	-0.457586	-0.692759	-1.93501	-1.14333	-0.814324	-1.29755	-0.822624	1.38985		0.321411
MGI:102522	CACNB1	NO	NO	NO	1297	1501	-0.927077	-0.428416	-1.16853	-3.36895	-2.07296	-3.47802	-2.97331	-0.84134	4.38316		0.0131129
MGI:99894	HNRNPK	NO	NO	NO	1333	1072	-0.917884	-1.0968	-0.782996	-1.02654	-1.40831	-1.30849	-1.24778	-0.932559	1.2442		0.09705
MGI:1915522	LINGO1	NO	NO	NO	2074	831	-0.909281	-0.827623	-0.856694	-2.08506	-1.11669	-1.70484	-1.63553	-0.864533	1.70645		0.0525883
MGI:2136381	HADHB	NO	NO	NO	725	221	-0.906312	-1.48256	-0.581825	2.48762	1.00468	1.14456	1.54562	-0.990231	0.172438		0.00940524
MGI:2140967	MAPRE3	NO	NO	NO	575	1659	-0.833412	-0.424502	-2.38846	1.23771	2.91606	2.6232	2.25899	-1.21546	0.0899676		0.0117643
MGI:1096342	RHOA	NO	NO	NO	2105	1419	-0.670117	-1.12614	-1.07915	-0.206731	-0.809386	-2.15556	-1.05723	-0.958466	1.07085		0.876013
MGI:102705	GNG2	NO	NO	NO	2086	1244	0.450304	-1.37614	-1.07517	-1.19602	-0.37751	0.150792	-0.474245	-0.667003	0.874931		0.793195
MGI:2135593	HADHA	NO	NO	NO	985	1070	-1.31794	-0.407008	-0.503418	1.26625	0.931189	0.630838	0.942759	-0.74279	0.310884		0.00790391
MGI:1934234	PIP4K2B	NO	NO	NO	1353	1621	-0.866432	-1.25333	-0.665025	0.0416817	1.1069	1.14019	0.762923	-0.928263	0.309672		0.013383
MGI:98084	RPN1	NO	NO	NO	828	1358	-0.836005	-0.586062	-0.761001	-1.68921	-2.43146	-2.62044	-2.24704	-0.727689	2.86662		0.00663677
MGI:1351628	RPS26P8	NO	NO	NO	1925	1270	-0.833114	-1.40874	-0.820012	-0.821005	-1.42115	-3.03038	-1.75751	-1.02062	1.66658		0.34419
MGI:109656	LASP1	NO	NO	NO	58	544	-0.752791	-0.447732	-1.01492	-0.570538	-0.675657	-0.291656	-0.512617	-0.738481	0.855083		0.32183
MGI:1914687	SSR3	NO	NO	NO	319	398	-0.133906	-0.350583	-1.3243	-0.950373	-0.612014	-3.52801	-1.6968	-0.602929	2.13446		0.33157
MGI:1351627	PDHX	NO	NO	NO	1645	1057	-0.853914	-0.349786	-0.4964	-0.63668	-0.447951	-2.27604	-1.12022	-0.5667	1.46767		0.408077
MGI:2136459	CDC42BPB	NO	NO	NO	2101	197	-0.561097	-0.323322	-1.05111	-1.48492	-1.24537	-1.783	-1.50443	-0.645176	1.8141		0.0315059
MGI:104561	NAPG	NO	NO	NO	1590	81	0.0923131	-0.296348	-1.05509	0.850439	0.803663	1.75062	1.13491	-0.419707	0.34042		0.0271557
MGI:1333780	RPS19	NO	NO	NO	1318	157	0.610297	-1.2247	-0.929412	-0.646307	-0.656847	-2.624	-1.30905	-0.514605	1.73441		0.412538
MGI:1344381	DNAJB6	NO	NO	NO	777	370	-0.962513	-0.264643	-0.474781	0.749815	0.132579	0.710667	0.53102	-0.567312	0.467056		0.0187313
MGI:2441950	LPHN3	NO	NO	NO	1177	1846	-0.584017	-1.25286	-0.926386	-3.4188	-2.65	-2.44068	-2.83649	-0.921089	3.77219	+	0.00568358
MGI:108202	PCBP2	NO	NO	NO	421	605	-1.42459	-0.254505	-0.594116	-0.204009	-0.435397	0.682969	0.014521	-0.757737	0.5855		0.187819
MGI:1309526	RPS17	NO	NO	NO	1499	2002	-0.719913	-1.13922	-0.872322	-0.434455	-1.63796	-1.73261	-1.26834	-0.910485	1.28152		0.457331
MGI:1913758	LAMTOR1	NO	NO	NO	553	1421	0.113397	-0.713332	-0.905763	-0.41334	-0.141976	-1.14634	-0.567219	-0.501899	1.04632		0.88746
MGI:2138993	LPCAT4	NO	NO	NO	1870	1663	-0.695873	-0.521368	-0.905615	-1.0339	-1.58436	-1.97379	-1.53068	-0.707619	1.76916		0.0490264
MGI:1920393	WDR37	NO	NO	NO	1002	1749	-1.45707	-0.234461	0.457739	-0.956147	-1.31768	-0.501372	-0.925067	-0.411264	1.42781		0.445351
MGI:1928900	EHD3	NO	NO	NO	676	868	-1.48719	-0.233474	-0.397051	1.65906	1.63712	2.78537	2.02718	-0.705906	0.150404		0.00748123
MGI:1913394	ATP6V1F	NO	NO	NO	160	1436	-0.329037	-1.12096	-0.886014	0.62498	-1.0366	0.578873	0.0557525	-0.77867	0.560808		0.233222
MGI:1932915	NDEL1	NO	NO	NO	228	1452	-0.688888	-0.923251	-0.629798	-1.07887	-0.793278	-0.93943	-0.937192	-0.747312	1.14067		0.193924
MGI:2389091	RPS15A	NO	NO	NO	1497	1262	-0.603432	-0.77868	-0.868734	-1.46409	-1.98511	-3.01348	-2.15423	-0.750282	2.64624		0.0383989
MGI:1345181	PACSIN1	NO	NO	NO	404	493	-0.663867	-1.28468	-0.778191	1.70387	2.58097	3.17049	2.48511	-0.908912	0.0951258	+	0.00190135
MGI:1338069	ITSN1	NO	NO	NO	1710	660	-0.657562	-0.813362	-0.702289	-1.16114	-1.16215	-0.991669	-1.10499	-0.724404	1.30187		0.00651335
MGI:1926078	RHOT1	NO	NO	NO	2216	475	-0.734074	-0.169503	-0.409896	-0.660313	-0.554063	-1.61227	-0.942214	-0.437824	1.41852		0.248842
MGI:1913840	FARSA	NO	NO	NO	994	1281	-0.622617	-0.422441	0.261323	0.894709	0.893417	1.23522	1.00778	-0.261245	0.41494		0.0120193
MGI:88274	CTNNA1	NO	NO	NO	1325	148	-0.613298	-1.31405	1.19143	-1.62712	-0.919	-0.567494	-1.03787	-0.245306	1.73215		0.382579
MGI:1925230	SBF1	NO	NO	NO	935	2250	-0.724158	-0.134446	-0.191115	-0.655673	-0.0035372	0.801762	0.0475173	-0.349906	0.759213		0.437676
MGI:1920344	SGIP1	NO	NO	NO	977	1997	-0.511727	-0.179929	-0.794962	-0.529843	-0.247219	0.320391	-0.152224	-0.495539	0.788228		0.325697
MGI:1096389	NRXN3	NO	NO	NO	1359	1189	-0.599938	-1.11545	-0.525491	-2.60316	-2.58635	-2.82809	-2.67253	-0.746959	3.79887	+	0.000665964
MGI:1098269	KIF5C	NO	NO	NO	918	2252	-0.244916	-0.114483	-0.923003	-0.0668007	0.0802094	0.785257	0.266222	-0.427468	0.618271		0.128801
MGI:1278336	CDKL5	NO	NO	NO	2252	1738	-0.50377	-0.839691	-0.771802	-2.63319	-1.89628	-2.35788	-2.29578	-0.705088	3.01195	+	0.00261343
MGI:96250	HSP90AA1	NO	NO	NO	1847	1575	-0.573296	-0.626009	-0.471524	1.74843	2.62033	1.40767	1.92548	-0.556943	0.178944	+	0.00241478
MGI:2139593	WDR47	NO	NO	NO	1383	1549	-0.354011	-1.2121	-0.745336	-1.98856	-0.612322	-0.760219	-1.12037	-0.770483	1.27446		0.524025
MGI:103251	ACLY	NO	NO	NO	668	577	-1.22029	-0.0661905	-0.191888	-0.444003	-0.947082	0.0652564	-0.441943	-0.492791	0.965369		0.918715
MGI:1919214	ATAD3A	NO	NO	NO	1618	590	-0.359464	-0.909358	-0.729129	0.126728	0.187553	-0.745147	-0.143622	-0.665984	0.696231		0.201379
MGI:1261855	CISD1	NO	NO	NO	648	629	0.26091	-0.89427	-0.715841	2.13481	1.97872	1.13203	1.74852	-0.449734	0.217902		0.00984742
MGI:1920082	CRTAC1	NO	NO	NO	2044	1570	-0.524717	-0.518397	-0.278433	0.0609484	-0.33582	0.55836	0.0944963	-0.440516	0.690153		0.119667
MGI:1915084	IDH3A	NO	NO	NO	965	1948	-1.33362	-0.0456861	0.0732278	1.27971	0.535033	-0.58587	0.409623	-0.435359	0.556718		0.296784
MGI:1914253	UQCRC2	NO	NO	NO	1715	345	-0.320498	-1.50388	-0.707547	1.06422	0.94586	1.33868	1.11625	-0.843976	0.256988	+	0.00593619
MGI:107532	KPNB1	NO	NO	NO	73	1535	-0.51393	-0.432413	-0.330668	1.04178	1.93111	0.365567	1.11282	-0.42567	0.344245		0.0280229
MGI:1270129	DNAJA1	NO	NO	NO	433	761	-0.290716	-0.92403	-0.6895	0.537938	-0.0887765	1.2516	0.566919	-0.634749	0.434772		0.0487795
MGI:1345961	CORO1A	NO	NO	NO	355	1528	-1.08102	-0.0243057	0.21873	1.63845	1.60136	2.60251	1.94744	-0.295532	0.211251		0.0122113
MGI:1202063	RPS3A	NO	NO	NO	1996	1598	0.20207	-0.135074	-0.682858	0.587101	-0.325628	-0.260033	0.000479967	-0.205287	0.867078		0.626537
MGI:1314653	MLLT4	NO	NO	NO	746	2330	-0.487608	-0.465755	-0.444166	-2.91107	-1.40835	-1.36345	-1.89429	-0.465843	2.69157		0.0484161
MGI:1098267	OGDH	NO	NO	NO	1103	1882	0.185875	-0.100413	-0.677003	0.374929	0.343994	-0.33624	0.127561	-0.19718	0.798442		0.39845
MGI:1346074	FXR2	NO	NO	NO	537	2179	-0.483447	-0.0877688	-0.0468847	-1.76165	-2.29422	-2.17591	-2.07726	-0.206033	3.65844	+	0.000928938
MGI:2446173	FARP1	NO	NO	NO	789	1693	-0.47559	-0.853894	-0.40375	-1.13935	-1.43477	-0.551326	-1.04182	-0.577745	1.37943		0.190569
MGI:98314	NOT_FOUND	NO	NO	NO	920	2174	-0.457176	-0.11576	-0.167995	-1.84186	-2.13482	-2.10397	-2.02688	-0.246977	3.43404	+	0.00022738
MGI:2656976	NOT_FOUND	NO	NO	NO	920	2174	-0.457176	-0.11576	-0.167995	-1.84186	-2.13482	-2.10397	-2.02688	-0.246977	3.43404	+	0.00022738
MGI:106530	NOT_FOUND	NO	NO	NO	920	2174	-0.457176	-0.11576	-0.167995	-1.84186	-2.13482	-2.10397	-2.02688	-0.246977	3.43404	+	0.00022738
MGI:1923164	EXOC6B	NO	NO	NO	2350	2197	-0.446179	-0.776842	-0.0403746	-1.2551	-1.34904	-2.62655	-1.74356	-0.421132	2.50087		0.0544464
MGI:98037	RPL30	NO	NO	NO	1417	1055	-2.03585	0.0573063	0.395392	-1.78587	-0.450963	-2.11996	-1.45227	-0.527716	1.89809		0.369665
MGI:1355272	CSNK1D	NO	NO	NO	390	2277	-0.414146	-0.492024	0.137391	0.347586	-0.940425	0.17723	-0.138536	-0.25626	0.921641		0.806505
MGI:1914921	RPL38	NO	NO	NO	1320	923	0.690529	0.0601195	-0.859987	3.66498	2.94363	2.59072	3.06644	-0.0364459	0.116396	+	0.00486331
MGI:2443456	TBC1D24	NO	NO	NO	1633	1907	-1.11958	0.060702	-0.101503	-0.627116	-0.432864	0.813118	-0.0822875	-0.386793	0.80972		0.62911
MGI:1914275	RPL11	NO	NO	NO	1841	1602	-0.4537	0.0642609	0.107028	-2.01562	0.0350435	-2.75793	-1.5795	-0.0941372	2.79988		0.157134
MGI:1351660	CSNK1E	NO	NO	NO	887	1495	-0.405276	-0.226119	-0.493237	-0.0864561	-1.93407	0.650111	-0.456806	-0.374878	1.05843		0.920657
MGI:1919418	AIFM3	NO	NO	NO	1041	1392	-0.400768	-0.299269	-0.0606994	-2.06582	-3.72508	-3.36784	-3.05292	-0.253579	6.96121	+	0.00552747
MGI:1929461	LPHN1	NO	NO	NO	1293	2370	-0.393551	-0.164769	-0.479412	-1.86083	-2.20675	-1.32615	-1.79791	-0.34591	2.73587		0.00599629
MGI:1915302	RPS13	NO	NO	NO	1496	562	0.9622	-0.577158	-0.581622	0.483965	-0.702157	-2.34936	-0.855851	-0.0655267	1.72946		0.4605
MGI:2652847	LRRC8A	NO	NO	NO	84	586	-0.373145	-0.564658	0.327175	-0.483126	-0.713367	-2.03012	-1.07554	-0.203543	1.83019		0.189898
MGI:1860197	WDR7	NO	NO	NO	1764	391	-0.352565	-0.59521	-0.517008	-1.22023	-0.622454	-0.579361	-0.807347	-0.488261	1.24754		0.218542
MGI:1915919	TAOK2	NO	NO	NO	220	1866	-0.283104	-1.17742	-0.532554	-1.73026	-2.40717	-2.29565	-2.14436	-0.66436	2.78948		0.0120039
MGI:98467	SYP	NO	NO	NO	888	2265	-0.0684994	-0.666782	-0.529132	-0.421084	-1.94547	-0.176973	-0.847842	-0.421471	1.34385		0.504518
MGI:700014	SORBS1	NO	NO	NO	251	2029	-0.338441	-0.193472	0.0171545	-1.09444	-0.601408	-0.441124	-0.712323	-0.171586	1.45472		0.0715677
MGI:1351486	TRAPPC3	NO	NO	NO	151	209	0.905157	0.14588	-0.904918	0.0794906	3.4754	-0.54645	1.00281	0.0487063	0.516161		0.520226
MGI:107949	RHOB	NO	NO	NO	34	1795	0.396783	-0.265137	-0.51546	-0.345512	-1.73466	-2.06962	-1.38326	-0.127938	2.38721		0.102036
MGI:1926465	HNRNPM	NO	NO	NO	1241	769	0.0873568	-0.0750842	-0.514525	-1.03696	-0.314144	-1.5483	-0.966468	-0.167417	1.73996		0.116839
MGI:1919210	MYH14	NO	NO	NO	2450	1912	-0.312024	-0.113729	0.118917	0.503467	0.799361	0.325485	0.542771	-0.102278	0.639471		0.0256441
MGI:1922867	RPS25	NO	NO	NO	439	238	0.334889	-0.325313	-0.496702	2.51874	1.50436	0.511058	1.51139	-0.162376	0.313435		0.0572286
MGI:2667185	MYO18A	NO	NO	NO	2270	2116	-0.286678	-0.127559	-0.360984	0.0748185	-1.08726	-0.7296	-0.58068	-0.258407	1.2503		0.409829
MGI:1890149	TPM3	NO	NO	NO	1393	1228	1.2765	0.187831	-0.807798	0.858753	1.48522	0.0377323	0.793902	0.218845	0.67126		0.47683
MGI:1891831	SFN	NO	NO	NO	472	308	-0.279383	0.0751052	-0.0708519	1.6943	0.569256	0.834549	1.0327	-0.0917099	0.458689		0.0338818
MGI:2442401	PPP1R9A	NO	NO	NO	289	1620	0.683577	0.198598	-1.32523	-2.02205	-1.07855	-1.27952	-1.46004	-0.147685	2.48346		0.121634
MGI:1343877	RPL10A	NO	NO	NO	1962	2339	-0.768528	0.395014	-0.464566	0.823846	-0.209299	-0.056803	0.185915	-0.27936	0.724333		0.382254
MGI:1927139	SV2A	NO	NO	NO	2194	1998	-0.287478	0.206687	0.0799662	-1.02705	-0.787268	-4.39568	-2.07	-0.000275147	4.19807		0.152764
MGI:1928395	SNX1	NO	NO	NO	1291	2125	-0.265012	0.012683	0.293521	1.4054	2.2923	2.26108	1.98626	0.0137305	0.254806	+	0.0040384
MGI:1891829	RBX1	NO	NO	NO	127	527	1.05007	-0.240211	-0.448546	0.0955123	0.957045	1.2589	0.770485	0.120437	0.637259		0.328111
MGI:1298206	PIP4K2A	NO	NO	NO	338	229	-0.253172	-0.522266	-0.000564041	3.53855	2.4402	3.61898	3.19925	-0.258667	0.0910048	+	0.00107213
MGI:2135610	DYNC1LI1	NO	NO	NO	269	944	-0.106223	-0.0170016	-0.44274	-2.29247	-0.889022	-0.106182	-1.09589	-0.188655	1.87545		0.236803
MGI:97552	PGAM1	NO	NO	NO	2047	1931	-0.244185	0.482013	-1.33513	1.58174	1.19614	0.937656	1.23851	-0.365767	0.3289		0.0457677
MGI:2444926	CKAP4	NO	NO	NO	1141	1066	-0.24257	-0.454351	-0.28694	-0.314378	0.150358	0.340693	0.0588909	-0.327954	0.764801		0.132148
MGI:98277	EPHA4	NO	NO	NO	298	654	-0.238664	0.146816	-0.156258	-0.0138592	-1.0094	0.25319	-0.256691	-0.0827019	1.12817		0.687216
MGI:1341299	DNM3	NO	NO	NO	2117	1161	-0.238482	-0.404168	0.870084	0.738141	0.898841	1.24424	0.960408	0.0758115	0.541639		0.107008
MGI:2664902	MARK1	NO	NO	NO	1303	2411	-0.234632	-0.427238	0.809014	-3.1859	-2.21523	-3.7829	-3.06134	0.0490478	8.63615		0.00646326
MGI:1861457	DYNLL1	NO	NO	NO	613	425	0	0.202625	-0.413257	1.02621	-0.0706878	2.45747	1.13766	-0.0702106	0.432906		0.184443
MGI:1917870	UBE2V2	NO	NO	NO	622	1782	-0.19738	0.273129	-0.657124	3.33824	2.91799	3.54994	3.26872	-0.193791	0.0907151	+	0.000447538
MGI:107185	CCT5	NO	NO	NO	380	247	-0.19327	0.115279	0.659583	0.358385	-0.647601	0.470156	0.0603132	0.193864	1.09699		0.773726
MGI:106184	NPM1	NO	NO	NO	1488	600	0.0661314	-0.201072	-0.38129	-0.597923	1.342	1.27056	0.671546	-0.172077	0.557242		0.263011
MGI:98020	RPL19	NO	NO	NO	812	449	0.218307	0.284939	-0.645768	-0.234921	-2.04729	-2.559	-1.61374	-0.0475076	2.9613		0.110398
MGI:2443972	EXOC3	NO	NO	NO	1172	1918	0.0173914	0.100124	-0.376904	-1.70519	0.0557236	-3.00695	-1.55214	-0.0864629	2.76193		0.178571
MGI:98166	RPS8	NO	NO	NO	1356	2011	1.78781	0.286814	-0.382495	-0.865214	-0.643406	-1.42761	-0.978743	0.564045	2.91357		0.0867257
MGI:1336205	FKBP1B	NO	NO	NO	1901	1132	-0.168276	-0.74745	-0.374957	-0.110715	-0.938075	0.1649	-0.29463	-0.430228	0.910293		0.734083
MGI:1924037	PPFIA3	NO	NO	NO	1917	1771	0.0609609	-0.190248	-0.37224	0.0708015	0.155417	0.732799	0.319672	-0.167176	0.713582		0.115627
MGI:1922858	CHMP4B	NO	NO	NO	831	996	0.403898	0.235898	-0.357598	0.637575	0.926569	0.633343	0.732496	0.0940659	0.642412		0.0634247
MGI:1913986	TTC35	NO	NO	NO	483	818	-0.148092	0.0125591	-0.356457	-0.00718351	-0.928409	-1.01433	-0.649975	-0.163997	1.40054		0.225656
MGI:2385163	GDAP1L1	NO	NO	NO	1731	498	-0.165777	-0.182015	0.222602	-0.851771	0.69963	-1.12456	-0.425566	-0.0417302	1.30481		0.546439
MGI:3039582	LMTK3	NO	NO	NO	1140	2065	-0.161123	-0.0731658	0.421733	-1.50406	-1.57367	-2.17222	-1.74998	0.0624813	3.51242	+	0.00289914
MGI:104562	NAPB	NO	NO	NO	2261	1384	0.0296685	0.316271	-1.09419	2.53827	2.86704	2.08719	2.4975	-0.249416	0.148969	+	0.00483316
MGI:99147	YES1	NO	NO	NO	482	76	-0.334883	0.318709	0.248373	-1.9494	-1.84011	-1.27972	-1.68974	0.0773993	3.40379	+	0.00381608
MGI:106484	RUFY3	NO	NO	NO	1029	1911	-0.152089	0.425133	-0.867437	1.92657	1.4301	2.39811	1.91826	-0.198131	0.230623		0.0105432
MGI:1858964	ACTR1A	NO	NO	NO	937	175	-0.20559	0.329981	0.806114	0.902485	1.96323	1.91259	1.59277	0.310168	0.411054		0.047122
MGI:105053	HSPH1	NO	NO	NO	2288	1357	0.126538	0.595619	0.677536	1.82279	1.51721	2.33938	1.89313	0.466565	0.372016		0.00842658
MGI:1355330	PHGDH	NO	NO	NO	393	1120	-0.179422	0.62198	-0.321477	2.95649	2.0111	3.28058	2.74939	0.0403603	0.152933	+	0.00488656
MGI:1921256	DNM1L	NO	NO	NO	1144	2104	0.177822	0.349464	-0.6815	1.90649	2.28625	1.71789	1.97021	-0.0514045	0.246282	+	0.00494516
MGI:95602	FYN	NO	NO	NO	1407	2289	0.457348	0.356459	-0.444642	0.252809	0.122018	0.89109	0.421972	0.123055	0.812862		0.465913
MGI:1923691	DAAM2	NO	NO	NO	2123	1635	-0.116786	-2.75811	-0.138519	-1.57226	-3.64754	-2.45218	-2.55733	-1.00447	2.93397		0.217948
MGI:98932	VIM	NO	NO	NO	1987	1156	-0.116088	0.131517	-0.0191886	5.17737	6.27498	5.29531	5.58255	-0.00125329	0.0208501	+	9.57191e-05
MGI:2443189	VPS39	NO	NO	NO	1748	955	-0.0947742	-0.352612	0.135954	0.392895	-0.812092	-1.27788	-0.565692	-0.103811	1.37734		0.42248
MGI:2154090	IGSF8	NO	NO	NO	1057	1492	-0.0801483	-0.668485	0.300497	-0.40361	1.53379	-0.512946	0.205744	-0.149378	0.781803		0.648614
MGI:1351605	RPL3	NO	NO	NO	2133	1489	0.00488051	-0.660188	-0.265902	-1.33958	-2.36667	-2.79755	-2.16793	-0.30707	3.63224		0.0171148
MGI:2443386	DNAJC11	NO	NO	NO	1795	1127	-0.0304229	-0.00449152	-0.0362049	-0.875512	-1.49239	-0.333047	-0.900318	-0.0237064	1.83606		0.0590226
MGI:2445020	EXOC1	NO	NO	NO	617	948	-0.0258315	0.0976883	0.564326	-0.766015	-0.478183	-0.192561	-0.47892	0.212061	1.61438		0.0474396
MGI:1915654	NRN1	NO	NO	NO	2087	1199	-0.00489708	0.0481942	-0.190729	-1.49843	-1.88265	-0.466787	-1.28262	-0.0491439	2.35134		0.0451953
MGI:1195462	GFRA2	NO	NO	NO	414	252	0.0133181	0.28955	0.0907036	-1.56906	-2.69831	-2.78458	-2.35065	0.131191	5.58611	+	0.00343669
MGI:1341070	FKBP8	NO	NO	NO	1744	716	-0.0296348	0.493099	0.130916	0.870219	0.825146	0.41963	0.704998	0.198127	0.703747		0.0739753
MGI:97050	MDH2	NO	NO	NO	1553	1527	-0.680328	0.500696	0.0973609	2.55887	1.56692	1.09078	1.73886	-0.0274236	0.293966		0.0333068
MGI:1338011	AUH	NO	NO	NO	580	539	0.0432162	0.523869	0.49455	0.792145	-0.489051	-1.98314	-0.560014	0.353879	1.88412		0.325893
MGI:2685946	BRSK1	NO	NO	NO	1145	2087	0.0641638	0.0893155	0.628257	-1.21493	-0.74545	-1.13332	-1.03123	0.260579	2.44836	+	0.00526836
MGI:1929261	MTCH1	NO	NO	NO	1878	899	0.324242	0.0473644	-0.116098	1.91925	0.23194	0.827385	0.992858	0.0851695	0.533038		0.150028
MGI:2387215	ERLIN2	NO	NO	NO	860	1020	0.18089	0.551561	-0.16977	0.822067	0.55018	0.472773	0.615006	0.18756	0.743577		0.141312
MGI:1278344	NIPSNAP1	NO	NO	NO	1705	232	0.40691	0.560311	-0.532374	-0.195162	0.321207	-0.886751	-0.253569	0.144949	1.31815		0.460817
MGI:1932557	LETM1	NO	NO	NO	573	724	0.102654	0.0960511	0.114653	-0.394924	0.498959	-0.514633	-0.136866	0.104453	1.18207		0.492525
MGI:96242	HSPD1	NO	NO	NO			0.126538	0.595619	0.677536	1.82279	1.51721	2.33938	1.89313	0.466565	0.372016
MGI:1859270	EXOC7	NO	NO	NO	1243	1438	0.114586	0.621631	0.575116	-1.36848	1.04458	0.0253055	-0.0995315	0.437111	1.45059		0.496278
MGI:1096376	EXOC4	NO	NO	NO	1058	678	0.719727	0.621747	-0.130842	-1.11618	-0.667389	-0.421946	-0.735172	0.403544	2.20185		0.0277869
MGI:1915599	NDUFS3	NO	NO	NO	826	411	0.648306	0.652307	-0.261974	1.51437	0.765662	0.694148	0.991393	0.346213	0.639413		0.183427
MGI:2445171	ENPP6	NO	NO	NO	1171	1346	0.224046	0.366749	0.0554291	3.34196	3.04839	2.9372	3.10918	0.215408	0.134551	+	4.31976e-05
MGI:104582	EPS15L1	NO	NO	NO	1184	1858	0.231735	-0.541927	0.971581	-1.11492	-0.905269	-0.993096	-1.00443	0.220463	2.33738		0.0499946
MGI:1345162	ADAM23	NO	NO	NO	689	651	0.036082	0.707946	0.359886	-1.87559	-2.24883	-1.94223	-2.02222	0.367971	5.24226	+	0.000448255
MGI:3608416	ELFN2	NO	NO	NO	1537	2061	0.344851	0.313686	0.0534742	-2.30041	-2.12825	-2.05065	-2.15977	0.237337	5.26745	+	3.49404e-05
MGI:1913732	EXOC2	NO	NO	NO	2279	2186	0.248185	-0.0768734	0.211637	-1.11924	-0.957629	-0.851377	-0.976081	0.12765	2.1491	+	0.00102354
MGI:1333757	STRN	NO	NO	NO	498	1679	0.355549	0.0422898	0.0637626	-1.89084	-2.13071	-1.93341	-1.98498	0.153867	4.40411	+	6.87958e-05
MGI:1278343	GBAS	NO	NO	NO	535	233	0.507803	0.576936	0.0744066	2.19529	1.39374	1.13359	1.57421	0.386382	0.438965		0.0289531
MGI:1928370	RHOG	NO	NO	NO	568	259	1.04028	0.197866	0.0968337	1.09159	0.320976	0.442508	0.618359	0.444993	0.886771		0.674235
MGI:106211	CDC42	NO	NO	NO	258	380	0.291715	0.301038	0.187872	0.4302	0.15464	-1.64541	-0.353524	0.260208	1.53021		0.399735
MGI:1338759	SEC22B	NO	NO	NO	238	186	0.294131	0.637223	0.674006	0.682089	-1.73303	0.464356	-0.195528	0.53512	1.65938		0.402339
MGI:88026	ANK3	NO	NO	NO	2426	2133	0.297275	0.563458	0.413881	0.175515	0.111245	0.520473	0.269078	0.424871	1.11403		0.353586
MGI:1349722	PABPC1	NO	NO	NO	304	515	0.313308	0.173185	0.442465	-1.51906	-0.33135	-0.920697	-0.923702	0.309653	2.35113		0.024714
MGI:1342005	MTHFD1	NO	NO	NO	1394	458	0.31827	0.0855319	0.257365	0.190184	-0.078295	0.298257	0.136715	0.220389	1.05971		0.560185
MGI:700009	SH3GL2	NO	NO	NO	609	1584	0.254346	0.793413	1.32276	2.88921	3.72513	4.65153	3.75529	0.790174	0.128059		0.00758467
MGI:98146	RPS18	NO	NO	NO	455	1446	1.27011	0.383418	0.131122	1.02822	0.25024	-0.499581	0.259626	0.594885	1.2616		0.581772
MGI:1917446	ACTR1B	NO	NO	NO	938	952	0.343026	-0.375608	0.517975	-0.26412	-0.0261919	1.22343	0.311039	0.161798	0.901725		0.794579
MGI:104694	NCAN	NO	NO	NO	1174	860	1.3719	0.392838	0.156541	0.897135	-0.900335	0.323767	0.106855	0.640425	1.44751		0.456294
MGI:101765	CDK5	NO	NO	NO	751	1361	-0.28718	0.82381	0.582818	0.503672	0.76116	1.19708	0.820636	0.373149	0.733319		0.318899
MGI:1349455	GPRIN1	NO	NO	NO	1788	921	0.731087	-0.0476977	0.161491	-0.70492	-1.25859	-0.679338	-0.880951	0.281627	2.23857		0.0178669
MGI:1915113	SLC25A11	NO	NO	NO	1447	1268	1.38963	0.777137	0.169737	1.34459	0.154769	-1.31866	0.0602317	0.778835	1.64559		0.443972
MGI:1927140	GIT1	NO	NO	NO	1863	2056	0.383037	0.220783	0.508175	-0.86544	0.971898	-1.26444	-0.385993	0.370665	1.68957		0.336653
MGI:1927596	GPRC5B	NO	NO	NO	292	538	0.916516	0	0.193308	3.41193	1.42485	2.55885	2.46521	0.369941	0.234025		0.0306122
MGI:1913325	CHCHD3	NO	NO	NO	520	2242	1.60223	0.805833	0.20402	1.54744	1.13232	0.612133	1.09729	0.870693	0.854646		0.665922
MGI:1923686	TUFM	NO	NO	NO	864	1315	0.494167	0.252235	0.218439	3.06406	1.99614	2.8531	2.63777	0.321614	0.200802	+	0.00237108
MGI:1920692	HSPA12A	NO	NO	NO	417	1327	0.409721	0.673746	0.804048	1.04134	1.98813	1.84396	1.62448	0.629172	0.50163		0.0347035
MGI:2384761	RAPGEF6	NO	NO	NO	1566	2168	0.941717	-1.16139	0.228775	0.454736	-0.287237	2.11911	0.762203	0.0030348	0.590837		0.465509
MGI:103264	ARHGEF2	NO	NO	NO	1557	1375	0.588132	0.539442	0.235209	0.394251	-0.35174	0.0832121	0.0419076	0.454261	1.33086		0.164798
MGI:2661175	CNKSR2	NO	NO	NO	2019	1192	0.599555	-0.11342	0.236072	-0.875056	-1.78769	-1.3494	-1.33738	0.240736	2.9858		0.00917488
MGI:108092	BIN1	NO	NO	NO	1308	185	0.2033	0.899894	0.725187	0.465245	1.23415	0.0482582	0.58255	0.60946	1.01883		0.950272
MGI:2443679	SIPA1L1	NO	NO	NO	2020	1898	0.427814	0.785039	0.692828	-4.03592	-2.2341	-1.56718	-2.6124	0.635227	9.49803		0.0120734
MGI:102889	VCAN	NO	NO	NO	344	403	0.432588	0.9935	-0.44984	4.17471	-1.38275	3.26077	2.01758	0.325416	0.309463		0.393453
MGI:2441697	GPR158	NO	NO	NO	1960	2001	0.440288	0.180061	0.454368	-1.68068	-3.00396	-1.22978	-1.97147	0.358239	5.02705		0.0124892
MGI:1860139	GABBR1	NO	NO	NO	108	1075	0.858735	0.355621	0.27117	-2.20493	-1.11148	-2.77655	-2.03099	0.495175	5.76037		0.00839059
MGI:1859516	RPS28	NO	NO	NO	2233	914	1.6835	0.226781	0.277511	0.87237	0.00158533	0.534291	0.469416	0.729263	1.19735		0.65578
MGI:88109	ATP1B2	NO	NO	NO	1594	496	0.47874	0.0284823	0.523792	2.26503	1.94312	2.39971	2.20262	0.343672	0.275677	+	0.000870188
MGI:2443235	RIMBP2	NO	NO	NO	1290	2325	0.646745	0.445611	0.292231	-2.14861	-2.08766	-3.11588	-2.45072	0.461529	7.5279	+	0.00112128
MGI:1915202	TOMM20	NO	NO	NO	554	393	0.511959	-0.281179	1.01844	1.47152	0.958381	0.112781	0.84756	0.416405	0.741668		0.475166
MGI:104871	PPP1CB	NO	NO	NO	1391	1388	0.514573	0.845649	1.00782	0.369104	-0.0818771	1.01968	0.435634	0.789347	1.27784		0.370754
MGI:3040672	RPL23A	NO	NO	NO	667	1963	0.535494	-0.658185	0.805791	0.148976	-1.00219	-3.48301	-1.44541	0.2277	3.18901		0.223386
MGI:1914596	DAAM1	NO	NO	NO	1819	2121	0.548043	-0.00995024	0.414643	-0.304626	-1.2013	-0.129257	-0.545061	0.317578	1.81836		0.0813397
MGI:1918659	FMNL2	NO	NO	NO	1048	1664	0.834843	0.25171	0.360501	2.83666	0.911469	1.71147	1.81986	0.482351	0.395702		0.0846987
MGI:1913293	ATP5D	NO	NO	NO	794	1902	0.85696	-0.232193	0.377097	1.14413	1.26735	-0.253379	0.719369	0.333955	0.765559		0.543139
MGI:104785	MYO6	NO	NO	NO	2335	2301	0.987986	0.683569	0.379006	0.673986	0.385096	-0.508918	0.183388	0.68352	1.41434		0.276336
MGI:1858210	STX7	NO	NO	NO	1539	1539	0.828989	0.797222	0.383336	1.03363	0.547715	0.0139833	0.531777	0.669849	1.10043		0.695062
MGI:97815	PTPRS	NO	NO	NO	1789	1230	0.579893	0.204673	0.79387	-2.05141	-0.615257	-1.58239	-1.41635	0.526145	3.84371		0.0131068
MGI:2448506	PI4KA	NO	NO	NO	1090	235	0.587448	0.995293	0.68148	-0.667663	0.247206	0	-0.140152	0.75474	1.85947		0.0405279
MGI:107851	NDUFV1	NO	NO	NO	917	700	0.304897	1.07234	0.684851	1.16626	2.3577	1.12975	1.55124	0.687362	0.549474		0.13372
MGI:1338002	GDAP1	NO	NO	NO	1545	829	1.42781	0.324855	0.422995	3.04898	2.05468	2.80832	2.63733	0.725222	0.265705		0.0144435
MGI:103307	CACNB3	NO	NO	NO	188	2303	0.616185	0.896635	0.757438	-2.32851	-2.51356	-0.580938	-1.80767	0.756752	5.91518		0.0144988
MGI:97852	RAP1A	NO	NO	NO	614	925	0.624637	0.428322	1.6908	1.60671	1.55087	0.0652564	1.07428	0.914587	0.895217		0.815037
MGI:3051532	UNC13A	NO	NO	NO	1186	1801	0.715267	0.9494	0.446443	-1.51361	-1.05547	-1.25514	-1.27474	0.703704	3.94068	+	0.000549787
MGI:1313136	CLIP2	NO	NO	NO	623	2027	0.639826	0.698289	0.44785	-0.6775	-1.6462	-0.216581	-0.846761	0.595322	2.71713		0.0280648
MGI:1919205	KIAA0174	NO	NO	NO	781	66	0.689891	1.03202	0.449503	0.762249	1.38394	2.0466	1.3976	0.723804	0.626856		0.173596
MGI:1915757	PPFIA4	NO	NO	NO	2183	2406	0.713228	0.672738	0.461757	-2.25735	-3.30772	-2.39673	-2.65393	0.615908	9.64541	+	0.000642212
MGI:1353561	VAPA	NO	NO	NO	1220	548	1.12695	1.04584	0.48483	0.217372	0.90031	0.150792	0.422824	0.885875	1.37845		0.213424
MGI:96245	HSPA9	NO	NO	NO	280	822	0.853903	1.00004	0.485153	1.94691	2.2268	1.61654	1.93009	0.779697	0.450504		0.00790465
MGI:1096368	AP1B1	NO	NO	NO	1750	2160	0.986363	0.345251	0.491585	-0.289208	-1.21002	-0.00486076	-0.501361	0.607733	2.1571		0.0546207
MGI:894297	CLTA	NO	NO	NO	500	2158	1.78949	1.04029	0.500223	-0.38148	1.00554	-0.0255426	0.199506	1.11	1.87969		0.178815
MGI:1309489	CASK	NO	NO	NO	2120	354	0.696734	0.633543	1.4858	0.0761549	0.714294	0.865496	0.551981	0.938691	1.30741		0.349835
MGI:98535	TCP1	NO	NO	NO	1547	1946	0.697289	1.05868	1.7179	1.98821	1.00798	1.87282	1.623	1.15796	0.724448		0.340367
MGI:894702	NUMBL	NO	NO	NO	104	1330	0.709378	0.835171	0.651707	-0.857839	-0.320667	-0.580307	-0.586271	0.732086	2.49382	+	0.00130832
MGI:108390	KIF2A	NO	NO	NO	367	2362	0.710715	0.91627	1.82728	0.975353	0.634708	-0.365623	0.414813	1.15142	1.66625		0.23607
MGI:1929260	MTCH2	NO	NO	NO	135	755	0.757125	1.51264	0.462003	1.78543	1.40875	-0.775812	0.806124	0.91059	1.0751		0.908913
MGI:1338890	CACNA2D3	NO	NO	NO	1687	689	1.36497	0.648437	0.569731	-3.58515	-4.64642	-6.48239	-4.90465	0.861046	54.4062	+	0.00284481
MGI:1915903	SAMM50	NO	NO	NO	1964	1024	-0.0733642	1.23913	0.977092	1.64681	2.02417	1.42406	1.69834	0.714284	0.505555		0.0877655
MGI:95393	ENO1	NO	NO	NO	2070	1970	0.704649	1.25748	1.30967	4.09861	4.38402	3.79892	4.09385	1.0906	0.124719	+	0.000306184
MGI:1915661	MAP1LC3A	NO	NO	NO	1984	909	1.15218	0.476116	0.595115	1.79238	2.04119	1.73941	1.85766	0.741136	0.461203		0.00808545
MGI:108057	RPL6	NO	NO	NO	1775	1401	1.12128	0.0507147	0.613515	-2.11882	-3.96962	-3.0977	-3.06205	0.595171	12.6163	+	0.00407266
MGI:1096317	EEF1A2	NO	NO	NO	495	360	0.809889	-0.38839	0.784602	-0.553964	1.66817	-1.23216	-0.0393179	0.402034	1.35788		0.669884
MGI:103064	DDX3X	NO	NO	NO	1312	1227	0.819689	0.886812	0.713198	-0.259055	-0.257404	-1.3615	-0.625986	0.806567	2.69924		0.0181611
MGI:1921393	OPA1	NO	NO	NO	233	291	1.49786	-0.0981351	0.637857	1.19983	2.17413	0.54945	1.3078	0.679195	0.6468		0.394797
MGI:1261814	PALM	NO	NO	NO	1679	656	0.828554	0.538459	1.61808	-1.35751	-1.45511	-1.39762	-1.40341	0.99503	5.27233	+	0.00177278
MGI:1923749	CLASP2	NO	NO	NO	1210	1822	0.832244	0.762256	0.819661	0.729374	-0.192773	0.337323	0.291308	0.80472	1.42742		0.127964
MGI:1337006	HAPLN1	NO	NO	NO	756	754	0.855468	1.2478	1.11923	0.423267	-2.36169	0.436191	-0.500745	1.07417	2.97917		0.168316
MGI:2151013	ERC1	NO	NO	NO	1230	294	1.14451	0.788663	0.6745	-1.69536	-1.84347	-1.91021	-1.81635	0.869226	6.43336	+	6.53258e-05
MGI:1890574	SPTBN4	NO	NO	NO	603	1301	0.867012	0.843659	0.752492	0.454676	0.960532	0.287649	0.567619	0.821054	1.19204		0.284558
MGI:106922	VDAC3	NO	NO	NO	993	454	1.70658	1.37035	0.631173	-0.807024	1.60126	0.217272	0.33717	1.23603	1.8646		0.306091
MGI:2659021	PHACTR1	NO	NO	NO	907	2230	0.900892	1.21662	0.741335	-1.83767	0.0310974	-0.3076	-0.704723	0.95295	3.15507		0.0487038
MGI:1918396	GOLGA7B	NO	NO	NO	1927	1652	1.78569	1.37731	0.632628	0.777721	0.311944	-0.168128	0.307179	1.26521	1.94266		0.0919712
MGI:97548	PFKM	NO	NO	NO	2242	1607	0.826887	1.39134	1.27812	1.00702	1.96353	1.50115	1.49057	1.16545	0.798232		0.374491
MGI:2153045	ELMO2	NO	NO	NO	1527	1781	0.918559	1.09183	0.834537	-0.526617	0.746193	-0.645545	-0.14199	0.948309	2.12918		0.0733027
MGI:1355329	MINK1	NO	NO	NO	1399	528	0.930893	0.962204	0.871318	-0.305035	0.0346212	-0.00808213	-0.092832	0.921472	2.01993	+	0.000771127
MGI:1915224	CCNY	NO	NO	NO	2077	1347	0.936282	-0.374634	0.752893	-1.36346	-0.869079	-1.70222	-1.31159	0.43818	3.36305		0.0212653
MGI:104708	CCT3	NO	NO	NO	1549	249	0.979007	1.27641	1.54099	0.917694	1.16721	1.83452	1.30648	1.26547	0.971974		0.903668
MGI:103301	CACNB4	NO	NO	NO	397	2148	0.995684	1.38663	1.22212	-2.52201	-1.56221	-0.904572	-1.66293	1.20148	7.28238	+	0.00405499
MGI:2138133	LRRC59	NO	NO	NO	1906	479	1.10845	0.612779	0.809078	0.195257	-0.748499	-2.70206	-1.0851	0.843437	3.80669		0.0897187
MGI:1924574	SORBS2	NO	NO	NO	2437	2217	1.00527	1.02703	1.03444	-1.58178	-0.431852	-1.26768	-1.09377	1.02224	4.33495	+	0.00351566
MGI:107184	CCT7	NO	NO	NO	598	1587	1.03539	0.900755	1.40977	0.767733	0.486251	1.24476	0.832914	1.11531	1.21621		0.352562
MGI:2443241	NDUFS1	NO	NO	NO	2166	1356	1.06816	1.80102	0.624092	1.54232	1.84531	0.566475	1.31804	1.16442	0.898996		0.780893
MGI:95766	GNA11	NO	NO	NO	1719	417	-3.07093	1.55576	2.27028	2.72857	-2.51884	-4.38992	-1.3934	0.251704	3.1277		0.576536
MGI:108025	PRKAR2A	NO	NO	NO	1075	978	0.832967	1.57646	1.22974	-1.42375	0.18159	-0.846209	-0.696122	1.21305	3.75594		0.0208704
MGI:104518	CNTN2	NO	NO	NO	796	373	1.11078	0.355482	1.48584	0.552528	-2.11601	-0.869379	-0.810952	0.984033	3.47012		0.0992941
MGI:1921575	CLTB	NO	NO	NO	501	1193	1.61021	1.06108	0.934115	-0.414775	1.15723	-1.41754	-0.22503	1.2018	2.68856		0.140383
MGI:1353554	MLF2	NO	NO	NO	735	255	1.12689	0.964677	0.98104	0.341192	0.117638	0.720483	0.393104	1.0242	1.54874		0.0262448
MGI:104689	CCT4	NO	NO	NO	1693	246	1.13605	1.59621	2.17584	0.168382	1.92824	2.2463	1.44764	1.63603	1.13949		0.804602
MGI:1920211	SLC17A7	NO	NO	NO	813	58	1.56327	1.01532	0.957246	1.20156	1.37351	2.00474	1.5266	1.17861	0.785678		0.326191
MGI:99919	VCP	NO	NO	NO	724	2124	1.16612	-0.177361	0.96524	0.669123	1.0542	-0.613622	0.369899	0.651332	1.2154		0.68964
MGI:1926170	DLST	NO	NO	NO	2003	843	2.09355	1.425	0.993103	2.98894	1.69621	0.999367	1.89484	1.50388	0.762625		0.588178
MGI:97812	PTPRD	NO	NO	NO	1137	2000	1.19276	1.47483	1.39895	0.0436521	0.748856	0.311	0.367836	1.35551	1.98299		0.0112823
MGI:1270156	SEPT4	NO	NO	NO	406	2170	1.19287	0.97771	1.01096	0.0194597	-0.253824	-0.0144186	-0.0829275	1.06051	2.20907	+	0.000465884
MGI:2443834	PPFIA2	NO	NO	NO	2452	1100	1.48441	1.61424	1.00484	0.634323	0.794713	1.17123	0.866755	1.36783	1.41527		0.109519
MGI:107733	DCTN2	NO	NO	NO	1476	242	1.33106	1.38102	1.06198	2.51149	1.75301	2.46231	2.24227	1.25802	0.505488		0.0204065
MGI:1923036	CKAP5	NO	NO	NO	905	1443	0.636934	2.02426	1.06818	2.57216	1.45461	0.421269	1.48268	1.24313	0.847006		0.763637
MGI:1349473	PPP2R5E	NO	NO	NO	110	1099	0.70741	1.73546	1.21626	0.677875	1.70003	1.39282	1.25691	1.21971	0.974546		0.934304
MGI:1201690	MAP6	NO	NO	NO	2002	234	1.26627	1.18113	1.44454	0.208796	0.573138	1.53458	0.772172	1.29731	1.43907		0.262488
MGI:97572	PHB	NO	NO	NO	567	815	2.47996	1.74786	0.613441	1.97542	2.14925	0.840806	1.65516	1.61375	0.971709		0.954405
MGI:109132	SNAP91	NO	NO	NO	230	446	1.7437	1.30366	1.08715	-0.172065	0.0535022	0.970845	0.284094	1.37817	2.13477		0.0519135
MGI:1928744	VAPB	NO	NO	NO	216	866	1.67534	1.76951	1.16653	1.1997	1.04807	0.995478	1.08108	1.53712	1.37177		0.0816268
MGI:2385184	AHCYL1	NO	NO	NO	1287	963	1.35701	1.42666	1.70661	0.613439	0.576526	1.89443	1.02813	1.49676	1.38379		0.352915
MGI:106295	TOMM70A	NO	NO	NO	517	2241	1.7407	1.39365	1.17873	2.09658	2.19441	1.51017	1.93372	1.4377	0.70906		0.139141
MGI:107186	CCT2	NO	NO	NO	1638	1480	1.3716	1.67587	1.2866	1.5723	0.961939	1.79397	1.44274	1.44469	1.00135		0.994681
MGI:1347354	HOMER2	NO	NO	NO	1890	836	1.37512	1.61313	1.62504	1.41552	0.101467	0.892364	0.803118	1.53776	1.66399		0.133102
MGI:1921084	ATP6V1D	NO	NO	NO	70	321	1.80109	1.59668	1.23353	1.27218	1.35305	0.659118	1.09478	1.54377	1.36508		0.177683
MGI:107943	CCT6A	NO	NO	NO	885	248	1.42341	1.07666	1.8055	0.993711	1.56906	2.09205	1.55161	1.43519	0.922477		0.774996
MGI:1914740	KIAA0776	NO	NO	NO	2334	2114	1.20732	1.89922	1.71069	-0.70175	-0.631584	0.670801	-0.220844	1.60574	3.54697		0.0205734
MGI:1921367	ACTR3	NO	NO	NO	898	223	0.225477	1.8997	1.5245	2.15884	1.70269	2.52134	2.12762	1.21656	0.531792		0.178969
MGI:1913739	RPL35	NO	NO	NO	1963	1282	1.96058	0.501453	1.23794	0.400446	0.73272	-0.387095	0.248691	1.23332	1.97881		0.140285
MGI:1346089	RGS7	NO	NO	NO	912	320	1.44445	1.84072	1.54289	0.993254	0.628286	1.92753	1.18302	1.60935	1.34381		0.35167
MGI:103574	AMPH	NO	NO	NO	1718	1776	1.65244	1.16974	1.27928	1.67016	1.88684	1.84642	1.80114	1.36716	0.740212		0.0539074
MGI:107996	SLC8A2	NO	NO	NO	365	991	1.5638	1.04073	1.28642	-2.19562	-0.803233	-1.66161	-1.55349	1.29698	7.21233	+	0.00275203
MGI:103010	EPB41L1	NO	NO	NO	766	1999	1.51173	1.42865	1.30525	0.841243	1.85491	2.09965	1.5986	1.41521	0.880633		0.662573
MGI:3665441	FAM81A	NO	NO	NO	1548	2043	1.49786	1.94565	2.2854	0.103052	0.502831	0.213564	0.273149	1.90964	3.10908	+	0.00313341
MGI:1350927	RPL8	NO	NO	NO	440	915	2.24875	2.00712	1.15295	0.65138	-0.595491	-1.0734	-0.339171	1.80294	4.41407		0.0249211
MGI:1915347	DYNLL2	NO	NO	NO	1072	780	1.87205	2.00925	1.32452	1.37657	0.329722	2.40458	1.37029	1.73527	1.28786		0.595914
MGI:1920960	TUBB2B	NO	NO	NO	982	51	1.9226	2.00574	1.35076	2.69071	2.88425	2.21047	2.59514	1.7597	0.560412		0.0437374
MGI:99638	MARK2	NO	NO	NO	2159	2092	1.55002	1.43429	2.01863	-1.12113	-0.536346	-1.34833	-1.00193	1.66765	6.36244	+	0.00088907
MGI:105100	CTNND1	NO	NO	NO	1285	1791	1.5641	1.44679	1.39015	-0.40767	-0.511404	0.619183	-0.0999638	1.46701	2.96283		0.0126482
MGI:2681842	IGSF21	NO	NO	NO	1681	1717	1.67583	1.45216	1.37818	1.33764	0.998124	1.08878	1.14151	1.50206	1.28391		0.0561128
MGI:1860437	OLFM1	NO	NO	NO	581	890	1.59718	2.02	1.84729	-0.134934	1.04772	0.434131	0.448974	1.82149	2.58921		0.0193963
MGI:1914410	EEF1G	NO	NO	NO	2445	1461	1.59951	1.10651	1.82378	0.927048	1.7531	1.2711	1.31708	1.50993	1.14302		0.579003
MGI:95755	SLC2A1	NO	NO	NO	1464	1354	1.80835	0.163072	1.45049	3.86459	0.469581	-0.0317838	1.43413	1.14064	0.815924		0.835166
MGI:96247	HSP90AB1	NO	NO	NO	1978	1194	1.65015	1.35339	1.81024	-1.18373	-0.102103	-1.29062	-0.858819	1.60459	5.51519	+	0.00361022
MGI:1351329	RPS11	NO	NO	NO	803	2290	2.75545	2.13266	0.88023	0.370707	-1.06416	-2.35799	-1.01715	1.92278	7.67373		0.0377818
MGI:2152971	RIMS1	NO	NO	NO	1823	2308	2.01201	1.32343	1.50213	-0.315357	-0.427133	0.267739	-0.158251	1.61252	3.41237	+	0.00403612
MGI:1929266	SND1	NO	NO	NO	1139	470	1.69415	1.34328	1.62186	1.08661	-0.265268	0.655372	0.492237	1.5531	2.08617		0.0619786
MGI:1926784	TAGLN3	NO	NO	NO	208	643	2.12279	1.72096	1.50468	2.62186	3.34183	1.68664	2.55011	1.78281	0.587515		0.208505
MGI:95697	GFAP	NO	NO	NO	818	272	1.69499	1.63394	1.82279	6.28034	7.51616	6.86283	6.88644	1.71724	0.0277917	+	0.000138583
MGI:107876	UQCRC1	NO	NO	NO	470	124	1.90416	1.81444	1.51912	2.45822	2.77133	1.36908	2.19955	1.74591	0.730199		0.361369
MGI:1858201	CNTNAP1	NO	NO	NO	1421	1642	1.71342	2.00885	1.99375	2.92575	2.45648	3.46895	2.95039	1.90534	0.484628		0.0274263
MGI:1915443	RPL24	NO	NO	NO	1727	1532	1.71448	1.23397	1.91402	-0.129667	-0.904459	-2.14548	-1.05987	1.62083	6.41165		0.012466
MGI:1927636	RPLP0	NO	NO	NO	307	1418	1.723	1.73321	1.6311	1.37212	0.604963	0.476447	0.817842	1.69577	1.83774		0.0355649
MGI:2442952	CASKIN1	NO	NO	NO	1873	1844	1.88572	1.25882	1.53847	0.0173333	0.430848	0.957022	0.468401	1.561	2.13258		0.0287533
MGI:1341265	CAMK2D	NO	NO	NO	2217	1819	1.69745	2.21235	1.81653	0.892212	2.31226	3.07317	2.09255	1.90877	0.880397		0.7938
MGI:2387581	PPP1R9B	NO	NO	NO	1051	1872	2.26549	2.06872	1.55526	-1.36912	0.274882	0.668812	-0.14181	1.96316	4.30188		0.0330893
MGI:97309	NEFH	NO	NO	NO	2412	179	1.97119	-0.0625476	1.56878	1.12175	1.47083	1.58412	1.39223	1.15914	0.850809		0.73302
MGI:1919264	BTBD17	NO	NO	NO	1824	343	1.7711	2.21381	2.39518	-0.731495	-1.06558	0.388313	-0.469586	2.1267	6.04727	+	0.00553764
MGI:88110	ATP2A2	NO	NO	NO	1257	1641	1.5487	2.29236	2.41564	0.712538	1.07816	0.828882	0.873194	2.08557	2.31719		0.0141503
MGI:109281	PKP4	NO	NO	NO	2257	2071	1.83808	1.79707	1.9897	0.352558	0.533041	0.49489	0.460163	1.87495	2.6662	+	6.09495e-05
MGI:1353472	RPL7A	NO	NO	NO	1670	1557	2.93044	2.20799	1.6812	0	-0.0566574	-2.4161	-0.824253	2.27321	8.55911		0.023977
MGI:99670	EPB49	NO	NO	NO	1572	550	1.87208	2.10385	2.04004	2.41818	2.36357	2.7054	2.49572	2.00533	0.711833		0.0179219
MGI:98387	SPTB	NO	NO	NO	1358	735	1.88892	2.22815	2.07433	3.96784	2.84441	2.80295	3.20506	2.0638	0.453361		0.0442599
MGI:2443716	SCAI	NO	NO	NO	1299	1406	1.8917	1.73761	1.91797	0.729424	0.655272	1.45077	0.945157	1.84909	1.87116		0.0253902
MGI:1917723	RAPGEF4	NO	NO	NO	1779	1524	2.4013	2.4123	1.60349	-0.529723	-0.700844	0.582541	-0.216009	2.13903	5.11608		0.00820244
MGI:99516	TNR	NO	NO	NO	1176	1146	2.28267	1.27803	1.79293	1.77458	1.89683	1.58031	1.75057	1.78454	1.02383		0.9165
MGI:1891833	PFKP	NO	NO	NO	342	519	1.36132	2.45776	2.75734	0.605947	1.60131	1.41581	1.20769	2.19214	1.97856		0.132875
MGI:3605641	SHISA7	NO	NO	NO	2422	2377	1.99562	2.39267	2.15048	-2.08267	-0.353563	-1.42511	-1.28712	2.17959	11.0556	+	0.00257373
MGI:98775	TMOD1	NO	NO	NO	95	2187	2.02604	2.02171	2.77996	3.79874	2.41471	1.1861	2.46652	2.27591	0.876234		0.822434
MGI:108077	NPTN	NO	NO	NO	2218	2199	2.03561	2.14337	1.85604	-5.44943	-1.96257	-2.29075	-3.23425	2.01167	37.9472		0.00926883
MGI:1915141	RPL4	NO	NO	NO	143	118	1.66012	2.53766	1.8802	1.41263	-0.950366	0.634784	0.365684	2.02599	3.16084		0.0893257
MGI:3580016	AGAP2	NO	NO	NO	1375	1671	2.06542	2.24697	2.03063	-0.0536292	0.255806	0.597287	0.266488	2.11434	3.59965	+	0.000756764
MGI:2444851	EFR3B	NO	NO	NO	2392	2259	2.11936	1.35534	2.22253	-0.507649	0.345129	-1.3305	-0.497673	1.89908	5.26615		0.012516
MGI:88529	CS	NO	NO	NO	819	152	2.14163	0.831963	2.0773	1.9153	1.49431	1.1836	1.53107	1.68363	1.11154		0.764658
MGI:1330861	DCLK1	NO	NO	NO	1370	2031	2.18336	2.26199	2.09689	1.08442	2.22822	1.90393	1.73886	2.18074	1.35838		0.267905
MGI:1858222	SEPT9	NO	NO	NO	2294	2083	2.19565	2.19716	2.12452	2.59907	3.30348	2.89823	2.93359	2.17244	0.590025		0.0207694
MGI:2681835	NLGN2	NO	NO	NO	1251	2035	2.24368	2.25718	2.99678	-0.201387	1.17566	0.109147	0.361142	2.49921	4.40174		0.0116643
MGI:98002	RPL12	NO	NO	NO	795	2338	2.90156	2.6298	2.05499	1.94884	1.52805	0.158411	1.21177	2.52878	2.4915		0.0913976
MGI:1345964	CORO1C	NO	NO	NO	2360	533	1.98682	2.71909	3.10732	2.16735	3.45319	1.89159	2.50404	2.60441	1.07204		0.871602
MGI:97281	NCAM1	NO	NO	NO	2320	462	2.26544	1.54686	2.11733	0.771936	1.34326	1.24561	1.12027	1.97654	1.81036		0.0382403
MGI:1330839	LIN7C	NO	NO	NO	636	886	2.47694	2.40591	2.09567	0.483135	0.995595	-1.0258	0.150977	2.32617	4.51647		0.0244421
MGI:1923864	IMMT	NO	NO	NO	350	1737	3.06868	2.05503	2.10328	2.11887	2.85104	1.08749	2.01913	2.409	1.31027		0.556776
MGI:1195966	CTNND2	NO	NO	NO	1457	878	2.38924	2.39464	2.3061	1.35572	1.31832	1.87028	1.51477	2.36333	1.80069		0.0092779
MGI:1918110	SEPT10	NO	NO	NO	1828	1317	1.60806	2.8688	2.41726	-1.80125	-0.201385	-1.41912	-1.14059	2.29804	10.8425	+	0.00479371
MGI:99551	CDH13	NO	NO	NO	765	2299	2.78021	2.03934	2.2104	1.60685	2.52437	1.23583	1.78901	2.34332	1.46846		0.279625
MGI:2181743	C11orf41	NO	NO	NO	2352	2243	2.40054	2.16238	2.28521	0.201646	0.232553	0.382142	0.272114	2.28271	4.02949	+	2.22477e-05
MGI:1913963	ACTR2	NO	NO	NO	178	1004	1.41634	3.27683	2.2205	1.29151	1.4308	1.86705	1.52979	2.30456	1.71092		0.242828
MGI:98889	UBC	NO	NO	NO	1270	928	2.75032	2.52222	2.24166	3.26244	2.99221	2.79944	3.01803	2.50473	0.70062		0.0615096
MGI:2145823	KCTD12	NO	NO	NO	1069	1892	2.46315	2.24283	2.55672	1.4917	0.652614	1.65282	1.26571	2.4209	2.22713		0.0234073
MGI:1913585	ATP6V1C1	NO	NO	NO	284	687	2.48689	2.30254	2.69796	1.73244	1.33482	2.45432	1.84053	2.4958	1.57491		0.131999
MGI:1355333	NCKAP1	NO	NO	NO	996	1465	2.49604	2.8259	3.17469	2.0412	2.02923	3.05516	2.37519	2.83221	1.3727		0.308895
MGI:1353498	SLC25A3	NO	NO	NO	701	529	2.99186	2.98907	2.30242	3.52566	3.89429	3.59607	3.67201	2.76112	0.531857		0.0235277
MGI:1859545	SYT7	NO	NO	NO	446	1198	2.81317	2.57583	2.33303	1.08059	1.35401	1.39089	1.27516	2.57401	2.46032	+	0.00156513
MGI:103008	EPB41L3	NO	NO	NO	1004	1987	2.542	2.0362	2.33765	3.0059	3.42111	3.51212	3.31304	2.30529	0.497319		0.00926663
MGI:88295	CACNA2D1	NO	NO	NO	2082	1474	2.67423	1.88715	2.34173	0.981156	1.24441	1.02198	1.08252	2.30104	2.32708		0.00734342
MGI:109602	GPHN	NO	NO	NO	532	2310	2.54085	2.39488	2.51028	0.0544217	0.918733	0.531929	0.501695	2.482	3.94577	+	0.00145751
MGI:95713	GJA1	NO	NO	NO	1398	1714	2.54434	2.16891	2.56537	1.79704	-0.232423	0.451454	0.672024	2.42621	3.37336		0.0451861
MGI:1890563	WASF1	NO	NO	NO	694	2068	2.54798	2.77539	2.53164	0.816974	2.51343	2.35867	1.89636	2.61833	1.64944		0.257505
MGI:106586	OMG	NO	NO	NO	1614	867	2.5489	1.80502	2.71996	1.83921	1.22991	1.37275	1.48062	2.35796	1.83698		0.0592242
MGI:2444283	CORO2B	NO	NO	NO	2447	1030	2.65541	3.02382	2.35339	2.5805	2.16123	2.94873	2.56349	2.67754	1.08227		0.722158
MGI:95835	HSPA5	NO	NO	NO	125	1476	2.58837	2.55031	2.37083	1.86445	2.04853	0.966792	1.62659	2.50317	1.83602		0.0618482
MGI:2446107	PDE2A	NO	NO	NO	2043	2292	2.56721	2.27637	3.31616	-0.532477	0.87718	0.408609	0.251104	2.71991	5.53587		0.00883112
MGI:88407	CKB	NO	NO	NO	732	889	2.35517	3.09558	3.52624	6.24539	6.17648	6.96492	6.46226	2.99233	0.0902498	+	0.00122369
MGI:2386030	GABBR2	NO	NO	NO	867	1839	2.65124	2.58625	2.76703	0.432105	0.899846	0.874178	0.735376	2.66817	3.81794	+	0.000274373
MGI:1924134	CYFIP2	NO	NO	NO	2232	1806	2.65863	2.98574	3.43731	2.4349	2.6942	3.04149	2.72353	3.02723	1.2343		0.348255
MGI:95613	GABRA1	NO	NO	NO	1605	172	3.2445	2.95646	2.47281	1.73506	1.1701	1.56471	1.48996	2.89126	2.6414		0.00751356
MGI:1098687	AAK1	NO	NO	NO	2421	1690	2.66969	2.17367	2.79224	0.914379	0.892719	1.46145	1.08952	2.5452	2.74287	+	0.00537391
MGI:104753	NFASC	NO	NO	NO	1867	1538	2.79155	2.33873	2.79122	2.79662	2.67189	3.13187	2.86679	2.6405	0.854829		0.329577
MGI:106913	ABI2	NO	NO	NO	2030	1734	2.82866	3.25962	3.21303	1.594	2.98758	3.31533	2.63231	3.10044	1.38332		0.438856
MGI:107183	CCT8	NO	NO	NO	1692	2048	2.89194	3.36678	2.52749	1.51545	1.45566	1.87731	1.61614	2.92874	2.48388		0.00897638
MGI:2141861	AP2S1	NO	NO	NO	1451	303	2.91194	2.50177	3.02227	2.49741	3.20922	2.61902	2.77521	2.81199	1.02582		0.898566
MGI:1915051	PLLP	NO	NO	NO	1013	416	3.13032	3.31932	2.7313	5.95218	4.05082	4.85749	4.9535	3.06031	0.269212		0.0305652
MGI:104878	PRKAR1A	NO	NO	NO	683	2286	2.93603	3.22085	3.00804	1.80785	0.969912	1.33599	1.37125	3.05497	3.21256	+	0.00281323
MGI:1100500	FLOT1	NO	NO	NO	878	276	2.94347	2.39905	2.74671	3.65518	4.02935	3.73143	3.80532	2.69641	0.463644	+	0.00479822
MGI:102704	GNG3	NO	NO	NO	757	655	3.39235	2.69305	2.79816	2.45845	1.93376	3.11712	2.50311	2.96119	1.37371		0.321977
MGI:103016	PPP1CA	NO	NO	NO	2140	686	2.71965	3.51755	3.82327	1.28509	0.52705	1.9962	1.26944	3.35349	4.23994		0.0178058
MGI:105368	ATP2B2	NO	NO	NO	343	606	3.09102	2.9111	3.07087	1.8355	0.664126	1.51344	1.33769	3.02433	3.21906		0.0088742
MGI:1096881	EEF1A1	NO	NO	NO	1908	1343	3.19436	2.69895	3.21545	4.33093	4.47773	4.38211	4.39693	3.03626	0.389401	+	0.00144853
MGI:88259	CAMK2G	NO	NO	NO	2403	526	2.74739	3.74786	3.27702	-2.43582	-2.47939	-0.822434	-1.91255	3.25742	36.0012	+	0.00111001
MGI:97298	SEPT2	NO	NO	NO	485	207	3.33614	3.18575	4.17619	3.68731	5.14133	4.50547	4.4447	3.56603	0.543867		0.167353
MGI:2684934	C6orf154	NO	NO	NO	1254	1336	3.23058	3.96683	3.17131	0.751316	1.46609	0.173381	0.796929	3.45624	6.31732	+	0.00420665
MGI:95772	GNAI2	NO	NO	NO	2262	2178	3.6288	2.6949	3.21217	4.08954	-1.76561	3.75697	2.02697	3.17863	2.22169		0.580539
MGI:2676665	LRRC7	NO	NO	NO	2007	2326	3.41858	3.26695	3.6464	-0.634556	1.26364	1.07631	0.568461	3.44398	7.33866		0.00942057
MGI:95771	GNAI1	NO	NO	NO	1815	2017	3.90268	1.82022	3.23224	3.05213	-2.96775	2.64994	0.911439	2.98505	4.20938		0.366399
MGI:101920	AP2A2	NO	NO	NO	2417	2253	3.42781	3.54591	4.56393	2.37244	2.56029	2.09234	2.34169	3.84588	2.83666		0.0174996
MGI:103020	SYN2	NO	NO	NO	742	2052	3.96744	3.88369	3.31072	1.68956	3.57423	3.73562	2.9998	3.72062	1.64812		0.354179
MGI:1261912	FBXO41	NO	NO	NO	1567	1851	3.78358	3.59469	3.39912	0.134786	1.20886	1.13821	0.827285	3.59246	6.79831	+	0.00161391
MGI:96680	KRAS	NO	NO	NO	2004	846	3.60479	4.02417	4.22218	2.51019	3.71473	2.61998	2.9483	3.95038	2.00289		0.078046
MGI:1914864	ATP6V1H	NO	NO	NO	1621	1383	3.61774	3.86334	3.93625	3.77091	5.16628	3.95348	4.29689	3.80578	0.711477		0.334881
MGI:894310	SEPT8	NO	NO	NO	2128	2371	3.63233	3.21797	3.57532	2.88389	3.25416	2.44915	2.8624	3.47521	1.52923		0.0828547
MGI:1914659	KCTD16	NO	NO	NO	93	2224	3.77091	4.00805	4.43418	2.48088	3.43291	3.5279	3.14723	4.07105	1.89713		0.0751681
MGI:88025	ANK2	NO	NO	NO	1096	1153	3.96933	3.82439	3.69276	2.89217	3.80869	3.69175	3.4642	3.82883	1.28755		0.289475
MGI:103309	FLOT2	NO	NO	NO	2300	2258	3.8944	3.65914	3.80046	4.47676	4.81879	4.426	4.57385	3.78467	0.578671	+	0.00500516
MGI:1098749	ERC2	NO	NO	NO	2095	1955	4.47965	4.5033	3.81191	1.69263	2.33862	2.61503	2.21543	4.26495	4.1397	+	0.00447096
MGI:95753	GLUD1	NO	NO	NO	557	178	4.08194	4.33893	4.33451	3.91159	5.25836	5.01276	4.72757	4.25179	0.719078		0.323336
MGI:1913487	ATP6V1G2	NO	NO	NO	1001	501	4.39413	3.19677	3.90256	2.93401	3.80756	3.53996	3.42718	3.83115	1.32315		0.403687
MGI:95780	GNAZ	NO	NO	NO	1742	1243	4.2995	2.75269	3.9151	3.24734	0.582798	3.13346	2.3212	3.65576	2.52199		0.247443
MGI:97180	MAPT	NO	NO	NO	1463	168	4.14074	4.29154	4.38413	3.00074	2.83736	4.01952	3.28587	4.27214	1.98105		0.058861
MGI:2444846	NEGR1	NO	NO	NO	1250	1578	4.46312	3.98894	4.12248	2.44938	3.19	2.2519	2.63043	4.19151	2.95076		0.00803861
MGI:894326	ATP6V1E1	NO	NO	NO	139	342	5.10982	4.78851	4.10443	2.15373	4.21883	3.79546	3.38934	4.66759	2.42544		0.140186
MGI:104913	ABI1	NO	NO	NO	2011	1927	4.38886	4.85268	4.93791	2.5191	3.3337	4.33148	3.39476	4.72648	2.51703		0.073056
MGI:1888939	SEPT6	NO	NO	NO	1337	1133	3.24219	4.87404	4.89629	2.79817	3.56231	1.91293	2.7578	4.3375	2.98908		0.0951823
MGI:1355335	TMOD2	NO	NO	NO	175	1784	4.50497	4.34263	4.22049	4.02172	4.12328	4.51268	4.21923	4.35603	1.09947		0.468064
MGI:1930016	SHANK3	NO	NO	NO	627	1677	4.52433	4.74373	4.25078	0.955114	2.21505	2.21129	1.79382	4.50628	6.5544	+	0.00360188
MGI:109618	ATP6V1B2	NO	NO	NO	283	341	4.71014	4.95622	4.15013	3.16694	4.18997	3.91997	3.75896	4.60549	1.79818		0.094586
MGI:107813	TUBB3	NO	NO	NO	466	130	4.72135	4.9523	4.32722	5.03239	4.96884	4.41417	4.80514	4.66696	0.908664		0.63338
MGI:107848	TUBB4	NO	NO	NO	466	130	4.72135	4.9523	4.32722	5.03239	4.96884	4.41417	4.80514	4.66696	0.908664		0.63338
MGI:101921	AP2A1	NO	NO	NO	1522	44	4.84162	5.0854	5.5848	3.82706	4.21992	3.89182	3.9796	5.17061	2.28312		0.00891096
MGI:2137706	ACTN1	NO	NO	NO	2268	1720	4.86693	5.06675	5.66568	3.14355	3.68354	3.39	3.4057	5.19979	3.46797	+	0.0033079
MGI:97397	OPCML	NO	NO	NO	74	1979	4.87765	4.84667	4.92627	3.76169	3.79068	3.64738	3.73325	4.88353	2.21957	+	2.03215e-05
MGI:103079	PURA	NO	NO	NO	754	312	4.89076	4.60011	4.79051	1.27497	1.38056	2.0419	1.56581	4.76046	9.15556	+	0.000232397
MGI:1298405	AP2M1	NO	NO	NO	704	253	4.95372	5.32067	5.28746	4.91071	5.40323	4.51519	4.94304	5.18728	1.18447		0.435785
MGI:2146021	MAL2	NO	NO	NO	1056	1036	4.97981	5.12162	5.30231	0.742307	2.14981	0.750815	1.21431	5.13458	15.1397	+	0.00119447
MGI:88275	CTNNA2	NO	NO	NO	2245	1267	5.06063	4.96294	5.60452	2.89579	3.90319	3.50894	3.43597	5.20936	3.41857		0.00748392
MGI:1313261	SPTBN2	NO	NO	NO	436	832	5.21702	5.463	5.52859	1.61336	3.58123	2.60105	2.59855	5.40287	6.9853		0.00822486
MGI:1261760	LSAMP	NO	NO	NO	456	1060	4.6644	5.79203	6.01495	2.92728	3.44831	3.68435	3.35331	5.49046	4.39891		0.0107569
MGI:1095410	TUBA4A	NO	NO	NO	277	285	5.22013	5.80784	5.38418	6.28289	6.46081	6.73271	6.49214	5.47072	0.49263		0.00949195
MGI:2446259	NTM	NO	NO	NO	2031	1780	5.52612	5.31606	5.20702	2.99332	2.73973	2.76378	2.83228	5.34973	5.72572	+	3.44158e-05
MGI:1345148	SEPT3	NO	NO	NO	1858	2331	5.44256	5.2336	5.71745	4.86098	5.08449	5.63505	5.19351	5.46454	1.20667		0.371186
MGI:96103	HK1	NO	NO	NO	589	2294	5.90199	5.2717	5.47553	4.82237	5.43227	4.30779	4.85414	5.54974	1.61956		0.13666
MGI:105384	HSPA8	NO	NO	NO	140	1521	5.87535	5.92865	6.06169	5.51704	6.22821	6.01348	5.91958	5.95523	1.02502		0.877889
MGI:105980	CNTN1	NO	NO	NO	950	467	6.07022	5.35268	5.75247	5.19081	4.62934	5.74543	5.18853	5.72512	1.45055		0.234092
MGI:103286	ATP6V0A1	NO	NO	NO	2243	1183	6.14347	5.58321	5.99848	3.52519	4.54568	2.97998	3.68362	5.90839	4.67436		0.0103924
MGI:107861	TUBB2A	NO	NO	NO	462	1631	7.33749	7.70391	7.26428	8.51319	8.0868	8.57858	8.39285	7.43523	0.514903		0.00960467
MGI:98460	SYN1	NO	NO	NO	1677	2173	7.41394	7.42422	7.32625	6.00369	7.35516	6.82411	6.72765	7.38814	1.58061		0.169255
MGI:97051	MDH1	NO	NO	NO	2420	1622	7.5571	5.87729	7.42558	2.41694	1.99331	0.586846	1.6657	6.95332	39.0601	+	0.00238457
MGI:98386	SPTAN1	NO	NO	NO	2363	2270	7.61547	7.5836	7.65364	6.15539	7.2714	7.06918	6.83199	7.61757	1.72378		0.0843801
MGI:1915472	TUBB2C	NO	NO	NO	278	971	8.57461	8.88287	8.43398	9.75398	9.70645	9.572	9.67747	8.63049	0.483978	+	0.0018675
