# Supplementary material for: Comparative Study of Human and Mouse Postsynaptic Proteomes Finds High Compositional Conservation and Abundance Differences for Key Synaptic Proteins
Source: PLoS One. 2012 Oct 5;7(10):e46683. doi: 10.1371/journal.pone.0046683 (PMC3465276; doi:10.1371/journal.pone.0046683)
Supplement: Table S6 — Biological Processes Overrepresented in Proteins Unique or Enriched to Each Species. Proteins from the consensus PSD exclusive or significantly enriched in human or mouse were classified independently using the Gene Ontology (GO) term ‘Biological Process’. Enrichment analysis was done to determine Biological Processes overrepresented in each species set of specific proteins. The Benjamini-Hochberg procedure was used to correct for multiple testing. The column ‘observed’ retrieves the number of proteins identified in each ‘Biological Process’ while the column ‘expected’, the number that would have been identified by chance. Over or under-representations are shown by a (+) or (−) symbol respectively. (XLSX) [file pone.0046683.s006.xlsx]

## Sheet: Legend
Table S6. Biological Processes Overrepresented in Proteins Unique or Enriched to Each Species.
Proteins from the consensus PSD exclusive or significantly enriched in human or mouse were classified independently using the Gene Ontology (GO) term 'Biological Process'. Enrichment analysis was done to determine Biological Processes overrepresented in each species set of specific proteins. The Benjamini-Hochberg procedure was used to correct for multiple testing. The column 'observed' retrieves…

## Sheet: Table S6
Biological Process in human PSD as compared with human genome								Biological Process in mouse PSD as compared with human genome
Biological Process	Homo sapiens genes	Observed	Expected	(over/under)	P-value	Corrected P-value		Biological Process	Observed	Expected	(over/under)	P-value	Corrected P-value
Unclassified	7108	25	61.05	-	6.38e-10	1.35894e-07		neurological system process	49	15.72	+	1.62e-12	2.92875e-10
protein folding	197	14	1.69	+	2.45e-09	2.60925e-07		synaptic transmission	30	6.29	+	2.75e-12	2.92875e-10
transcription	1993	1	17.12	-	2.94e-07	1.47822e-05		system process	52	19.19	+	5.21e-11	3.6991e-09
transcription from RNA polymerase II promoter	1987	1	17.06	-	3.11e-07	1.47822e-05		cell communication	94	49.42	+	9.05e-11	4.81913e-09
protein transport	1254	30	10.77	+	3.47e-07	1.47822e-05		nerve-nerve synaptic transmission	13	1.14	+	2.49e-10	1.06074e-08
intracellular protein transport	1254	30	10.77	+	3.47e-07	1.47822e-05		nucleobase, nucleoside, nucleotide and nucleic acid metabolic process	12	44.87	-	6.11e-10	2.16905e-08
regulation of transcription from RNA polymerase II promoter	1563	0	13.42	-	8.49e-07	2.58339e-05		cellular process	118	72.49	+	1.96e-09	5.964e-08
cellular component morphogenesis	734	19	6.3	+	2.1e-05	0.00046434		regulation of transcription from RNA polymerase II promoter	1	21.27	-	5.76e-09	1.5336e-07
anatomical structure morphogenesis	734	19	6.3	+	2.1e-05	0.00046434		transport	64	32.24	+	5.9e-08	1.39633e-06
response to stress	265	11	2.28	+	2.18e-05	0.00046434		cell-cell signaling	32	11.73	+	3.53e-07	7.5189e-06
protein metabolic process	2803	44	24.07	+	4.15e-05	0.000803591		transcription	6	27.13	-	4.73e-07	9.017e-06
vesicle-mediated transport	801	19	6.88	+	6.74e-05	0.00119635		transcription from RNA polymerase II promoter	6	27.04	-	5.08e-07	9.017e-06
cellular component organization	989	20	8.49	+	0.000355	0.00581654		signal transduction	80	46.97	+	5.55e-07	9.09346e-06
protein complex assembly	73	5	0.63	+	0.00046	0.0065888		vesicle-mediated transport	29	10.9	+	2.12e-06	3.22543e-05
transport	2369	36	20.35	+	0.000464	0.0065888		protein transport	36	17.07	+	2.12e-05	0.000300706
metabolic process	7511	85	64.51	+	0.000929	0.0123673		intracellular protein transport	36	17.07	+	2.12e-05	0.000300706
intracellular signaling cascade	1017	19	8.73	+	0.00127	0.0159124		neurotransmitter secretion	13	3.17	+	2.4e-05	0.000300706
nucleobase, nucleoside, nucleotide and nucleic acid metabolic process	3297	15	28.32	-	0.00245	0.0289917		exocytosis	14	3.77	+	3.42e-05	0.0004047
cellular process	5326	63	45.74	+	0.00245	0.0289917		translation	16	4.82	+	3.61e-05	0.0004047
glycolysis	72	4	0.62	+	0.00364	0.038766		protein amino acid phosphorylation	22	8.96	+	0.000119	0.00126735
cell motion	448	10	3.85	+	0.00568	0.0576114		neuronal action potential propagation	5	0.65	+	0.000562	0.00563061
primary metabolic process	7131	77	61.24	+	0.00812	0.0786164		response to stimulus	4	15.18	-	0.000586	0.00563061
monosaccharide metabolic process	151	5	1.3	+	0.0102	0.0944609		immune system process	9	22.82	-	0.000608	0.00563061
endocytosis	353	8	3.03	+	0.0118	0.0999462		Unclassified	72	96.74	-	0.000854	0.00757925
generation of precursor metabolites and energy	285	7	2.45	+	0.0121	0.0999462		synaptic vesicle exocytosis	8	1.99	+	0.000993	0.00846036
pyrimidine base metabolic process	55	3	0.47	+	0.0122	0.0999462		ion transport	19	8.55	+	0.00113	0.00925731
G-protein coupled receptor protein signaling pathway	680	1	5.84	-	0.0185	0.145296		ferredoxin metabolic process	2	0.08	+	0.00315	0.02485
synaptic transmission	462	9	3.97	+	0.0191	0.145296		cation transport	15	6.89	+	0.0044	0.0334714
system development	1206	4	10.36	-	0.0203	0.147726		DNA metabolic process	0	5.08	-	0.00595	0.0437017
tricarboxylic acid cycle	26	2	0.22	+	0.0214	0.147726		intracellular signaling cascade	24	13.84	+	0.00672	0.047712
cell-cell adhesion	442	0	3.8	-	0.0215	0.147726		primary metabolic process	78	97.06	-	0.00859	0.0580425
neuromuscular synaptic transmission	27	2	0.23	+	0.023	0.153094		RNA metabolic process	1	6.72	-	0.00872	0.0580425
cell surface receptor linked signal transduction	1628	7	13.98	-	0.027	0.174273		immune response	1	6.47	-	0.011	0.071
fatty acid metabolic process	204	5	1.75	+	0.0323	0.20235		dorsal/ventral axis specification	3	0.5	+	0.0146	0.0914647
reproduction	368	0	3.16	-	0.0412	0.250731		cell adhesion	20	11.76	+	0.0155	0.0943286
protein modification process	1177	16	10.11	+	0.0472	0.279267		metabolic process	85	102.23	-	0.0171	0.101175
tRNA aminoacylation for protein translation	42	2	0.36	+	0.0512	0.289792		proteolysis	6	13.43	-	0.0179	0.102576
neurotransmitter secretion	233	5	2	+	0.0517	0.289792		protein metabolic process	51	38.15	+	0.0183	0.102576
gamete generation	335	0	2.88	-	0.0549	0.297135		protein modification process	25	16.02	+	0.0192	0.104862
purine base metabolic process	100	3	0.86	+	0.0558	0.297135		muscle contraction	9	4.1	+	0.0234	0.122085
response to stimulus	1115	15	9.58	+	0.0578	0.297705		cell surface receptor linked signal transduction	32	22.16	+	0.0235	0.122085
protein amino acid phosphorylation	658	10	5.65	+	0.0588	0.297705		G-protein coupled receptor protein signaling pathway	16	9.26	+	0.0252	0.1278
system process	1410	18	12.11	+	0.0601	0.297705		anion transport	4	1.22	+	0.0356	0.176344
pentose-phosphate shunt	8	1	0.07	+	0.0664	0.321436		asymmetric protein localization	2	0.3	+	0.0367	0.177661
RNA metabolic process	494	1	4.24	-	0.0729	0.340356		protein localization	2	0.3	+	0.0367	0.177661
carbohydrate metabolic process	687	10	5.9	+	0.0737	0.340356		phosphate metabolic process	5	1.91	+	0.0439	0.203276
mRNA processing	298	0	2.56	-	0.0759	0.340356		protein targeting	5	1.96	+	0.0485	0.219656
respiratory electron transport chain	262	5	2.25	+	0.0767	0.340356		tricarboxylic acid cycle	2	0.35	+	0.0495	0.219656
cellular amino acid metabolic process	266	5	2.28	+	0.0806	0.350363		nuclear mRNA splicing, via spliceosome	0	2.97	-	0.0506	0.219955
cellular amino acid and derivative metabolic process	266	5	2.28	+	0.0806	0.350363		cytokinesis	4	1.39	+	0.052	0.22152
ion transport	628	2	5.39	-	0.0916	0.376027		calcium-mediated signaling	5	2.15	+	0.0665	0.277735
exocytosis	277	5	2.38	+	0.0918	0.376027		DNA repair	0	2.61	-	0.0724	0.296562
cellular defense response	264	0	2.27	-	0.102	0.406636		nitric oxide biosynthetic process	1	0.08	+	0.0784	0.315079
receptor-mediated endocytosis	131	3	1.13	+	0.104	0.406636		nitric oxide mediated signal transduction	1	0.08	+	0.0784	0.315079
cytokine-mediated signaling pathway	261	0	2.24	-	0.105	0.406636		mRNA processing	1	4.06	-	0.086	0.333055
mesoderm development	754	3	6.48	-	0.109	0.414589		mitosis	9	5.31	+	0.088	0.334714
nervous system development	738	3	6.34	-	0.119	0.444051		macrophage activation	0	2.29	-	0.101	0.377421
muscle contraction	301	5	2.59	+	0.119	0.444051		mesoderm development	6	10.26	-	0.11	0.403966
neurological system process	1155	14	9.92	+	0.123	0.444051		DNA replication	0	2.11	-	0.12	0.416463
developmental process	2093	23	17.98	+	0.131	0.460918		reproduction	2	5.01	-	0.122	0.416463
cell adhesion	864	4	7.42	-	0.132	0.460918		response to stress	1	3.61	-	0.123	0.416463
oxidative phosphorylation	76	2	0.65	+	0.139	0.477532		cellular defense response	1	3.59	-	0.125	0.416463
nuclear mRNA splicing, via spliceosome	218	0	1.87	-	0.152	0.513905		general transcription from RNA polymerase II promoter	2	0.61	+	0.126	0.416463
pattern specification process	207	0	1.78	-	0.167	0.550523		monosaccharide metabolic process	0	2.06	-	0.127	0.416463
DNA metabolic process	373	1	3.2	-	0.168	0.550523		cytokine-mediated signaling pathway	1	3.55	-	0.129	0.416463
coenzyme metabolic process	92	2	0.79	+	0.187	0.595147		organelle organization	1	3.55	-	0.129	0.416463
cation transport	506	2	4.35	-	0.188	0.595147		segment specification	0	2.03	-	0.131	0.416463
translation	354	5	3.04	+	0.19	0.595147		oxygen and reactive oxygen species metabolic process	2	0.69	+	0.154	0.482382
immune system process	1677	18	14.4	+	0.194	0.59887		transmembrane receptor protein tyrosine kinase signaling pathway	1	3.29	-	0.158	0.487739
spermatogenesis	187	0	1.61	-	0.199	0.605529		gamete generation	2	4.56	-	0.165	0.497959
nuclear transport	98	2	0.84	+	0.206	0.618		MAPKKK cascade	6	3.7	+	0.169	0.497959
skeletal system development	181	0	1.55	-	0.21	0.62125		establishment or maintenance of chromatin architecture	1	3.2	-	0.17	0.497959
cytokinesis	102	2	0.88	+	0.219	0.639		carbohydrate metabolic process	6	9.35	-	0.172	0.497959
angiogenesis	172	0	1.48	-	0.227	0.653392		nucleobase, nucleoside, nucleotide and nucleic acid transport	2	0.75	+	0.173	0.497959
mitosis	390	5	3.35	+	0.245	0.690228		localization	2	0.76	+	0.178	0.50552
cell communication	3631	35	31.18	+	0.252	0.690228		B cell mediated immunity	0	1.7	-	0.181	0.507276
RNA localization	34	1	0.29	+	0.253	0.690228		lipid transport	4	2.26	+	0.192	0.531117
fatty acid biosynthetic process	34	1	0.29	+	0.253	0.690228		generation of precursor metabolites and energy	6	3.88	+	0.195	0.5325
blood coagulation	158	0	1.36	-	0.256	0.690228		carbohydrate transport	2	0.87	+	0.217	0.583778
response to external stimulus	158	0	1.36	-	0.256	0.690228		nitrogen compound metabolic process	1	0.24	+	0.217	0.583778
DNA replication	155	0	1.33	-	0.263	0.691593		cellular amino acid catabolic process	2	0.88	+	0.222	0.583778
embryonic development	151	0	1.3	-	0.272	0.706537		phospholipid metabolic process	1	2.8	-	0.229	0.594841
segment specification	149	0	1.28	-	0.277	0.710855		fatty acid metabolic process	1	2.78	-	0.234	0.5964
ectoderm development	827	5	7.1	-	0.282	0.715071		extracellular transport	0	1.42	-	0.242	0.5964
cell cycle	1152	12	9.89	+	0.287	0.719188		protein amino acid glycosylation	1	2.72	-	0.243	0.5964
lipid metabolic process	836	9	7.18	+	0.292	0.723209		natural killer cell activation	0	1.4	-	0.245	0.5964
cell-cell signaling	862	9	7.4	+	0.323	0.790793		induction of apoptosis	5	3.36	+	0.248	0.5964
B cell mediated immunity	125	0	1.07	-	0.341	0.820888		protein folding	1	2.68	-	0.251	0.5964
organelle organization	261	1	2.24	-	0.343	0.820888		steroid metabolic process	1	2.68	-	0.251	0.5964
protein targeting	144	2	1.24	+	0.351	0.8307		hemopoiesis	0	1.37	-	0.252	0.5964
synaptic vesicle exocytosis	146	2	1.25	+	0.357	0.835615		purine base metabolic process	0	1.36	-	0.256	0.599209
induction of apoptosis	247	1	2.12	-	0.372	0.840275		nuclear transport	0	1.33	-	0.263	0.608902
nucleobase, nucleoside, nucleotide and nucleic acid transport	55	1	0.47	+	0.377	0.840275		spermatogenesis	1	2.55	-	0.277	0.630032
localization	56	1	0.48	+	0.382	0.840275		sulfur metabolic process	0	1.28	-	0.277	0.630032
tRNA metabolic process	56	1	0.48	+	0.382	0.840275		visual perception	5	3.54	+	0.281	0.630032
transmembrane receptor protein tyrosine kinase signaling pathway	242	1	2.08	-	0.383	0.840275		coenzyme metabolic process	0	1.25	-	0.285	0.632344
visual perception	260	3	2.23	+	0.387	0.840275		response to interferon-gamma	0	1.24	-	0.289	0.634608
establishment or maintenance of chromatin architecture	235	1	2.02	-	0.399	0.840275		muscle organ development	1	2.45	-	0.296	0.636912
heart development	105	0	0.9	-	0.405	0.840275		JAK-STAT cascade	0	1.21	-	0.297	0.636912
extracellular transport	104	0	0.89	-	0.408	0.840275		cellular component morphogenesis	12	9.99	+	0.3	0.636912
natural killer cell activation	103	0	0.88	-	0.412	0.840275		anatomical structure morphogenesis	12	9.99	+	0.3	0.636912
immune response	475	3	4.08	-	0.416	0.840275		homeostatic process	0	1.18	-	0.305	0.636912
lipid transport	166	2	1.43	+	0.418	0.840275		neuromuscular synaptic transmission	1	0.37	+	0.308	0.636932
hemopoiesis	101	0	0.87	-	0.419	0.840275		transcription initiation from RNA polymerase II promoter	0	1.16	-	0.314	0.642981
signal transduction	3451	31	29.64	+	0.423	0.840275		cell-matrix adhesion	0	1.14	-	0.318	0.642981
polysaccharide metabolic process	225	1	1.93	-	0.423	0.840275		response to toxin	0	1.13	-	0.322	0.642981
cellular amino acid biosynthetic process	64	1	0.55	+	0.423	0.840275		system development	14	16.41	-	0.323	0.642981
cellular amino acid catabolic process	65	1	0.56	+	0.428	0.840275		meiosis	2	1.21	+	0.342	0.6745
JNK cascade	98	0	0.84	-	0.43	0.840275		endocytosis	6	4.8	+	0.349	0.675134
blood circulation	96	0	0.82	-	0.438	0.845496		DNA recombination	0	1.05	-	0.35	0.675134
anion transport	90	0	0.77	-	0.461	0.845496		rRNA metabolic process	0	1.05	-	0.35	0.675134
JAK-STAT cascade	89	0	0.76	-	0.465	0.845496		oxidative phosphorylation	0	1.03	-	0.355	0.675134
complement activation	73	1	0.63	+	0.466	0.845496		blood coagulation	1	2.15	-	0.366	0.679397
apoptosis	681	5	5.85	-	0.468	0.845496		response to external stimulus	1	2.15	-	0.366	0.679397
phospholipid metabolic process	206	1	1.77	-	0.471	0.845496		negative regulation of apoptosis	1	2.14	-	0.369	0.679397
homeostatic process	87	0	0.75	-	0.473	0.845496		protein complex assembly	0	0.99	-	0.37	0.679397
proteolysis	987	9	8.48	+	0.475	0.845496		glycolysis	0	0.98	-	0.375	0.682692
transcription initiation from RNA polymerase II promoter	85	0	0.73	-	0.481	0.845496		antigen processing and presentation	0	0.98	-	0.375	0.682692
DNA recombination	77	1	0.66	+	0.484	0.845496		embryonic development	1	2.06	-	0.39	0.698067
I-kappaB kinase/NF-kappaB cascade	84	0	0.72	-	0.485	0.845496		RNA catabolic process	0	0.93	-	0.396	0.7029
nerve-nerve synaptic transmission	84	0	0.72	-	0.485	0.845496		fertilization	0	0.93	-	0.396	0.7029
protein amino acid glycosylation	200	1	1.72	-	0.487	0.845496		polysaccharide metabolic process	2	3.06	-	0.408	0.706619
steroid metabolic process	197	1	1.69	-	0.495	0.845496		cell motion	7	6.1	+	0.41	0.706619
vitamin transport	79	0	0.68	-	0.507	0.845496		lipid metabolic process	10	11.38	-	0.412	0.706619
anterior/posterior axis specification	79	0	0.68	-	0.507	0.845496		angiogenesis	3	2.34	+	0.415	0.706619
DNA repair	192	1	1.65	-	0.508	0.845496		apoptosis	8	9.27	-	0.418	0.706619
response to toxin	83	1	0.71	+	0.51	0.845496		nervous system development	11	10.04	+	0.423	0.709441
cell-matrix adhesion	84	1	0.72	+	0.515	0.845496		skeletal system development	3	2.46	+	0.447	0.743836
rRNA metabolic process	77	0	0.66	-	0.516	0.845496		tRNA metabolic process	0	0.76	-	0.466	0.769442
glycogen metabolic process	85	1	0.73	+	0.519	0.845496		pyrimidine base metabolic process	0	0.75	-	0.473	0.774545
female gamete generation	76	0	0.65	-	0.52	0.845496		respiratory electron transport chain	4	3.57	+	0.478	0.774545
meiosis	89	1	0.76	+	0.535	0.856733		amino acid transport	1	0.65	+	0.48	0.774545
antigen processing and presentation	72	0	0.62	-	0.538	0.856733		chromosome segregation	1	1.74	-	0.48	0.774545
muscle organ development	180	1	1.55	-	0.542	0.856733		cellular amino acid metabolic process	4	3.62	+	0.49	0.77839
response to interferon-gamma	91	1	0.78	+	0.543	0.856733		cellular amino acid and derivative metabolic process	4	3.62	+	0.49	0.77839
cholesterol metabolic process	93	1	0.8	+	0.551	0.859717		cell cycle	15	15.68	-	0.497	0.77839
sulfur metabolic process	94	1	0.81	+	0.555	0.859717		developmental process	28	28.49	-	0.511	0.791804
RNA catabolic process	68	0	0.58	-	0.557	0.859717		regulation of biological process	0	0.67	-	0.513	0.791804
fertilization	68	0	0.58	-	0.557	0.859717		regulation of vasoconstriction	0	0.67	-	0.513	0.791804
macrophage activation	168	1	1.44	-	0.577	0.87		cellular component organization	13	13.46	-	0.521	0.792664
carbohydrate transport	64	0	0.55	-	0.577	0.87		receptor-mediated endocytosis	2	1.78	+	0.533	0.798378
sensory perception	384	3	3.3	-	0.58	0.87		cyclic nucleotide metabolic process	0	0.63	-	0.534	0.798378
MAPKKK cascade	272	2	2.34	-	0.586	0.872853		pattern specification process	3	2.82	+	0.536	0.798378
calcium-mediated signaling	158	1	1.36	-	0.606	0.8946		cellular calcium ion homeostasis	0	0.61	-	0.542	0.799781
negative regulation of apoptosis	157	1	1.35	-	0.609	0.8946		ectoderm development	11	11.26	-	0.548	0.799781
oxygen and reactive oxygen species metabolic process	51	0	0.44	-	0.645	0.935869		vitamin metabolic process	0	0.6	-	0.549	0.799781
regulation of biological process	49	0	0.42	-	0.656	0.935869		transmembrane receptor protein serine/threonine kinase signaling pathway	0	0.6	-	0.549	0.799781
regulation of vasoconstriction	49	0	0.42	-	0.656	0.935869		RNA elongation from RNA polymerase II promoter	0	0.59	-	0.557	0.799781
phosphate metabolic process	140	1	1.2	-	0.662	0.935869		defense response to bacterium	0	0.59	-	0.557	0.799781
neuronal action potential propagation	48	0	0.41	-	0.662	0.935869		tRNA aminoacylation for protein translation	0	0.57	-	0.564	0.799781
amino acid transport	48	0	0.41	-	0.662	0.935869		phagocytosis	0	0.56	-	0.572	0.799781
cyclic nucleotide metabolic process	46	0	0.4	-	0.673	0.935869		sensory perception	5	5.23	-	0.576	0.799781
general transcription from RNA polymerase II promoter	45	0	0.39	-	0.679	0.935869		sensory perception of sound	0	0.54	-	0.58	0.799781
cellular calcium ion homeostasis	45	0	0.39	-	0.679	0.935869		heart development	1	1.43	-	0.581	0.799781
vitamin metabolic process	44	0	0.38	-	0.685	0.935869		cellular amino acid biosynthetic process	1	0.87	+	0.582	0.799781
transmembrane receptor protein serine/threonine kinase signaling pathway	44	0	0.38	-	0.685	0.935869		mRNA 3'-end processing	0	0.53	-	0.588	0.802846
RNA elongation from RNA polymerase II promoter	43	0	0.37	-	0.691	0.935869		cell-cell adhesion	6	6.02	-	0.604	0.818232
defense response to bacterium	43	0	0.37	-	0.691	0.935869		sensory perception of pain	0	0.5	-	0.604	0.818232
chromosome segregation	128	1	1.1	-	0.699	0.935869		JNK cascade	1	1.33	-	0.615	0.818232
phagocytosis	41	0	0.35	-	0.703	0.935869		antigen processing and presentation of peptide or polysaccharide antigen via MHC class II	0	0.48	-	0.621	0.818232
sensory perception of sound	40	0	0.34	-	0.709	0.937994		blood circulation	1	1.31	-	0.624	0.818232
mRNA 3'-end processing	39	0	0.33	-	0.715	0.940093		RNA localization	0	0.46	-	0.629	0.818232
sensory perception of pain	37	0	0.32	-	0.728	0.951313		fatty acid biosynthetic process	0	0.46	-	0.629	0.818232
dorsal/ventral axis specification	37	0	0.32	-	0.728	0.951313		complement activation	1	0.99	+	0.63	0.818232
antigen processing and presentation of peptide or polysaccharide antigen via MHC class II	35	0	0.3	-	0.74	0.955273		cellular glucose homeostasis	0	0.45	-	0.638	0.819922
cellular glucose homeostasis	33	0	0.28	-	0.753	0.966199		cholesterol metabolic process	1	1.27	-	0.639	0.819922
mRNA polyadenylation	32	0	0.27	-	0.76	0.969341		mRNA polyadenylation	0	0.44	-	0.647	0.825216
gluconeogenesis	30	0	0.26	-	0.773	0.979053		gluconeogenesis	0	0.41	-	0.665	0.843125
mRNA transcription	29	0	0.25	-	0.779	0.979053		mRNA transcription	0	0.39	-	0.674	0.844526
mammary gland development	29	0	0.25	-	0.779	0.979053		mammary gland development	0	0.39	-	0.674	0.844526
endoderm development	28	0	0.24	-	0.786	0.979053		glycogen metabolic process	1	1.16	-	0.678	0.844526
protein amino acid acetylation	27	0	0.23	-	0.793	0.982029		I-kappaB kinase/NF-kappaB cascade	1	1.14	-	0.683	0.845808
mitochondrion organization	26	0	0.22	-	0.8	0.982234		endoderm development	0	0.38	-	0.683	0.845808
mitochondrial transport	26	0	0.22	-	0.8	0.982234		protein amino acid acetylation	0	0.37	-	0.692	0.84605
fatty acid beta-oxidation	25	0	0.21	-	0.807	0.982234		mitochondrion organization	0	0.35	-	0.702	0.84605
acyl-CoA metabolic process	24	0	0.21	-	0.814	0.985125		mitochondrial transport	0	0.35	-	0.702	0.84605
porphyrin metabolic process	22	0	0.19	-	0.828	0.988083		vitamin transport	1	1.08	-	0.708	0.84605
asymmetric protein localization	22	0	0.19	-	0.828	0.988083		anterior/posterior axis specification	1	1.08	-	0.708	0.84605
protein localization	22	0	0.19	-	0.828	0.988083		fatty acid beta-oxidation	0	0.34	-	0.711	0.84605
vitamin biosynthetic process	21	0	0.18	-	0.835	0.988083		acyl-CoA metabolic process	0	0.33	-	0.721	0.850823
protein amino acid lipidation	21	0	0.18	-	0.835	0.988083		female gamete generation	1	1.03	-	0.723	0.850823
termination of RNA polymerase II transcription	19	0	0.16	-	0.849	0.993241		porphyrin metabolic process	0	0.3	-	0.741	0.867214
lysosomal transport	18	0	0.15	-	0.857	0.993241		vitamin biosynthetic process	0	0.29	-	0.751	0.874115
nitrogen compound metabolic process	18	0	0.15	-	0.857	0.993241		protein amino acid lipidation	0	0.29	-	0.751	0.874115
sex determination	17	0	0.15	-	0.864	0.993241		termination of RNA polymerase II transcription	0	0.26	-	0.772	0.888843
regulation of carbohydrate metabolic process	17	0	0.15	-	0.864	0.993241		lysosomal transport	0	0.24	-	0.783	0.896661
phosphate transport	16	0	0.14	-	0.872	0.993241		sex determination	0	0.23	-	0.793	0.903257
gut mesoderm development	15	0	0.13	-	0.879	0.995385		regulation of carbohydrate metabolic process	0	0.23	-	0.793	0.903257
peroxisomal transport	14	0	0.12	-	0.887	0.995385		phosphate transport	0	0.22	-	0.804	0.906095
regulation of nucleobase, nucleoside, nucleotide and nucleic acid metabolic process	14	0	0.12	-	0.887	0.995385		gut mesoderm development	0	0.2	-	0.815	0.913658
sensory perception of chemical stimulus	12	0	0.1	-	0.902	0.995385		peroxisomal transport	0	0.19	-	0.826	0.921141
protein amino acid methylation	10	0	0.09	-	0.918	0.995385		regulation of nucleobase, nucleoside, nucleotide and nucleic acid metabolic process	0	0.19	-	0.826	0.921141
protein amino acid ADP-ribosylation	10	0	0.09	-	0.918	0.995385		sensory perception of chemical stimulus	0	0.16	-	0.849	0.936979
DNA catabolic process	10	0	0.09	-	0.918	0.995385		protein amino acid methylation	0	0.14	-	0.873	0.952045
sensory perception of taste	10	0	0.09	-	0.918	0.995385		protein amino acid ADP-ribosylation	0	0.14	-	0.873	0.952045
regulation of liquid surface tension	9	0	0.08	-	0.926	0.995385		DNA catabolic process	0	0.14	-	0.873	0.952045
response to pheromone	7	0	0.06	-	0.942	0.995385		sensory perception of taste	0	0.14	-	0.873	0.952045
pinocytosis	7	0	0.06	-	0.942	0.995385		regulation of liquid surface tension	0	0.12	-	0.885	0.952045
transcription, RNA-dependent	6	0	0.05	-	0.95	0.995385		pentose-phosphate shunt	0	0.11	-	0.897	0.960106
nitric oxide biosynthetic process	6	0	0.05	-	0.95	0.995385		response to pheromone	0	0.1	-	0.909	0.968085
regulation of amino acid metabolic process	6	0	0.05	-	0.95	0.995385		pinocytosis	0	0.1	-	0.909	0.968085
ferredoxin metabolic process	6	0	0.05	-	0.95	0.995385		transcription, RNA-dependent	0	0.08	-	0.922	0.970449
unsaturated fatty acid biosynthetic process	6	0	0.05	-	0.95	0.995385		regulation of amino acid metabolic process	0	0.08	-	0.922	0.970449
nitric oxide mediated signal transduction	6	0	0.05	-	0.95	0.995385		unsaturated fatty acid biosynthetic process	0	0.08	-	0.922	0.970449
disaccharide metabolic process	5	0	0.04	-	0.958	0.995385		disaccharide metabolic process	0	0.07	-	0.934	0.970449
polyphosphate catabolic process	4	0	0.03	-	0.966	0.998825		polyphosphate catabolic process	0	0.05	-	0.947	0.97918
mRNA capping	3	0	0.03	-	0.975	1		mRNA capping	0	0.04	-	0.96	0.987826
regulation of phosphate metabolic process	3	0	0.03	-	0.975	1		regulation of phosphate metabolic process	0	0.04	-	0.96	0.987826
sensory perception of smell	2	0	0.02	-	0.983	1		sensory perception of smell	0	0.03	-	0.973	0.991622
nitrogen utilization	2	0	0.02	-	0.983	1		nitrogen utilization	0	0.03	-	0.973	0.991622
vitamin catabolic process	1	0	0.01	-	0.991	1		vitamin catabolic process	0	0.01	-	0.986	0.995346
catabolic process	1	0	0.01	-	0.991	1		catabolic process	0	0.01	-	0.986	0.995346
bile acid metabolic process	1	0	0.01	-	0.991	1		bile acid metabolic process	0	0.01	-	0.986	0.995346
						1							1
