# Supplementary material for: Comparative Study of Human and Mouse Postsynaptic Proteomes Finds High Compositional Conservation and Abundance Differences for Key Synaptic Proteins
Source: PLoS One. 2012 Oct 5;7(10):e46683. doi: 10.1371/journal.pone.0046683 (PMC3465276; doi:10.1371/journal.pone.0046683)
Supplement: Table S8 — Functional Comparison of all PSD Proteins Identified in Human and Mouse. All human and mouse PSD proteins were classified together using the Panther ‘Protein Class’ descriptor. An enrichment analysis was done to determine Protein Classes overrepresented compared with the human genome. The Benjamini-Hochberg procedure was used to correct for multiple testing. The column ‘observed’ retrieves the number of proteins identified in each ‘Protein Class’ while the column ‘expected’, the number that would have been identified by chance. Over or under-representations are shown by a (+) or (−) symbol respectively. (XLSX) [file pone.0046683.s008.xlsx]

## Sheet: Legend
Table S8. Functional Comparison of all PSD Proteins Identified in Human and Mouse.
All human and mouse PSD proteins were classified together using the Panther 'Protein Class' descriptor. An enrichment analysis was done to determine Protein Classes overrepresented compared with the human genome. The Benjamini-Hochberg procedure was used to correct for multiple testing. The column 'observed' retrieves the number of proteins identified in each 'Protein Class' while the column 'exp…

## Sheet: Table S8
Protein Class in human and mouse PSD proteins as compared with human genome
PANTHER Protein Class	Homo sapiens genes	Observed	Expected	over/under	P-value	Corrected P-value
cytoskeletal protein	441	163	41.91	+	2.02e-47	3.8986e-45
transcription factor	2067	41	196.41	-	1.94e-44	1.8721e-42
membrane traffic protein	321	123	30.5	+	2.27e-37	1.46037e-35
actin family cytoskeletal protein	222	96	21.1	+	2.61e-33	1.25932e-31
non-motor actin binding protein	114	61	10.83	+	3.19e-26	1.23134e-24
zinc finger transcription factor	803	7	76.3	-	6.46e-25	2.07797e-23
enzyme modulator	857	183	81.43	+	1.67e-23	4.60443e-22
KRAB box transcription factor	552	1	52.45	-	4.35e-22	1.04944e-20
ribosomal protein	184	70	17.48	+	1.31e-21	2.80922e-20
dehydrogenase	210	69	19.95	+	4.68e-18	9.0324e-17
G-protein	206	68	19.57	+	6.5e-18	1.14045e-16
G-protein modulator	278	79	26.42	+	5.69e-17	9.15142e-16
oxidoreductase	550	121	52.26	+	9.42e-17	1.39851e-15
chaperone	130	50	12.35	+	4.99e-16	6.87907e-15
transporter	1098	193	104.34	+	5.88e-16	7.5656e-15
microtubule family cytoskeletal protein	156	55	14.82	+	6.43e-16	7.75619e-15
kinase	679	137	64.52	+	7.05e-16	8.00382e-15
membrane trafficking regulatory protein	107	44	10.17	+	2.87e-15	3.07728e-14
cation transporter	178	57	16.91	+	1.05e-14	1.06658e-13
ATP synthase	51	28	4.85	+	4.18e-13	4.0337e-12
small GTPase	158	50	15.01	+	6.77e-13	6.22195e-12
Unclassified	6763	508	642.64	-	1.6e-11	1.40364e-10
RNA binding protein	727	129	69.08	+	2.96e-11	2.48383e-10
nucleotide kinase	51	23	4.85	+	2.03e-09	1.63246e-08
transferase	1512	215	143.67	+	3.92e-09	3.02624e-08
non-motor microtubule binding protein	53	22	5.04	+	1.92e-08	1.42248e-07
protein kinase	510	91	48.46	+	1.99e-08	1.42248e-07
guanyl-nucleotide exchange factor	79	27	7.51	+	2.7e-08	1.86107e-07
SNARE protein	37	18	3.52	+	3.63e-08	2.41583e-07
heterotrimeric G-protein	36	17	3.42	+	1.3e-07	8.36333e-07
vesicle coat protein	30	15	2.85	+	3.45e-07	2.1479e-06
helix-turn-helix transcription factor	233	3	22.14	-	4.56e-07	2.75025e-06
homeobox transcription factor	233	3	22.14	-	4.56e-07	2.75025e-06
Hsp70 family chaperone	13	10	1.24	+	7.32e-07	4.15518e-06
chaperonin	20	12	1.9	+	7.9e-07	4.35629e-06
transmembrane receptor regulatory/adaptor protein	84	25	7.98	+	1.05e-06	5.62917e-06
ion channel	341	58	32.4	+	2.69e-05	0.000140316
tubulin	25	11	2.38	+	3.86e-05	0.000196047
microtubule binding motor protein	46	15	4.37	+	5.21e-05	0.000257828
calcium channel	31	12	2.95	+	5.9e-05	0.000284675
ligand-gated ion channel	101	23	9.6	+	0.00016	0.000744429
aminoacyl-tRNA synthetase	20	9	1.9	+	0.000162	0.000744429
reductase	65	17	6.18	+	0.000236	0.00105926
transcription cofactor	255	9	24.23	-	0.000344	0.00150891
intermediate filament binding protein	10	6	0.95	+	0.000454	0.00194716
DNA binding protein	476	25	45.23	-	0.000674	0.00282787
intermediate filament	11	6	1.05	+	0.000742	0.00304694
basic helix-loop-helix transcription factor	120	2	11.4	-	0.000844	0.00339358
mitochondrial carrier protein	17	7	1.62	+	0.0014	0.00551429
nucleic acid binding	1466	173	139.3	+	0.00228	0.00866608
carbohydrate kinase	35	10	3.33	+	0.00229	0.00866608
hydrolase	454	63	43.14	+	0.0024	0.00890769
cytokine	159	5	15.11	-	0.00252	0.0091766
peptide hormone	169	6	16.06	-	0.00375	0.0134028
peroxidase	27	8	2.57	+	0.0049	0.0171945
myelin protein	33	9	3.14	+	0.00499	0.0171977
signaling molecule	961	68	91.32	-	0.00556	0.018826
lyase	104	19	9.88	+	0.00625	0.0207974
amino acid transporter	98	18	9.31	+	0.00725	0.0237161
extracellular matrix glycoprotein	55	12	5.23	+	0.0075	0.024125
protease inhibitor	109	3	10.36	-	0.00783	0.0247736
protease	476	30	45.23	-	0.00994	0.0309423
extracellular matrix protein	72	14	6.84	+	0.0106	0.032473
ligase	260	37	24.71	+	0.0119	0.0358859
amino acid kinase	5	3	0.48	+	0.0126	0.0374123
acetyltransferase	105	18	9.98	+	0.0138	0.0403545
phosphodiesterase	27	7	2.57	+	0.016	0.0456956
Hsp90 family chaperone	10	4	0.95	+	0.0161	0.0456956
serine protease inhibitor	79	2	7.51	-	0.02	0.055942
RNA helicase	71	13	6.75	+	0.0207	0.0570729
anion channel	37	8	3.52	+	0.0272	0.073938
deaminase	12	4	1.14	+	0.0288	0.0772
actin and actin related protein	31	7	2.95	+	0.0307	0.0811658
structural protein	280	37	26.61	+	0.0315	0.0821554
membrane-bound signaling molecule	133	6	12.64	-	0.0315	0.0821554
G-protein coupled receptor	447	31	42.48	-	0.0394	0.100055
receptor	1076	85	102.24	-	0.0414	0.103769
endoribonuclease	33	0	3.14	-	0.0434	0.107387
serine protease	153	8	14.54	-	0.0468	0.114334
oxidase	57	10	5.42	+	0.0493	0.118936
actin binding motor protein	9	3	0.86	+	0.0556	0.131612
aldolase	4	2	0.38	+	0.0563	0.131612
storage protein	15	4	1.43	+	0.0566	0.131612
defense/immunity protein	107	5	10.17	-	0.0605	0.139006
nuclear hormone receptor	46	1	4.37	-	0.0677	0.153719
neuropeptide	28	0	2.66	-	0.0698	0.156644
damaged DNA-binding protein	45	1	4.28	-	0.0731	0.162164
methyltransferase	130	7	12.35	-	0.0745	0.163392
HMG box transcription factor	44	1	4.18	-	0.079	0.170912
oxygenase	74	3	7.03	-	0.0797	0.170912
phosphatase	230	29	21.86	+	0.0808	0.171367
transketolase	5	2	0.48	+	0.0827	0.17349
glycosidase	26	0	2.47	-	0.0844	0.175153
growth factor	165	10	15.68	-	0.0881	0.180886
transaldolase	1	1	0.1	+	0.0907	0.182546
translation factor	56	9	5.32	+	0.0908	0.182546
immunoglobulin superfamily cell adhesion molecule	25	5	2.38	+	0.0927	0.184444
basic leucine zipper transcription factor	24	0	2.28	-	0.102	0.200878
CREB transcription factor	24	0	2.28	-	0.102	0.200878
isomerase	94	13	8.93	+	0.119	0.229307
nucleotide phosphatase	35	6	3.33	+	0.12	0.229307
tumor necrosis factor receptor	22	0	2.09	-	0.123	0.230115
RNA methyltransferase	22	0	2.09	-	0.123	0.230115
DNA helicase	80	4	7.6	-	0.124	0.230115
interleukin superfamily	36	1	3.42	-	0.144	0.264686
endodeoxyribonuclease	20	0	1.9	-	0.149	0.271292
calcium-binding protein	63	9	5.99	+	0.151	0.272364
chemokine	48	2	4.56	-	0.166	0.296648
ATP-binding cassette (ABC) transporter	74	4	7.03	-	0.17	0.301009
immunoglobulin	33	1	3.14	-	0.18	0.314712
centromere DNA-binding protein	18	0	1.71	-	0.181	0.314712
metalloprotease	145	10	13.78	-	0.19	0.327411
interferon superfamily	17	0	1.62	-	0.199	0.338596
kinase activator	45	2	4.28	-	0.2	0.338596
intracellular calcium-sensing protein	33	5	3.14	+	0.208	0.340967
type I cytokine receptor	31	1	2.95	-	0.207	0.340967
calmodulin	33	5	3.14	+	0.208	0.340967
extracellular matrix structural protein	9	2	0.86	+	0.211	0.340967
annexin	9	2	0.86	+	0.211	0.340967
hydroxylase	44	2	4.18	-	0.212	0.340967
transaminase	25	4	2.38	+	0.216	0.344529
galactosidase	16	0	1.52	-	0.218	0.344869
potassium channel	89	11	8.46	+	0.232	0.364033
apolipoprotein	42	2	3.99	-	0.239	0.37056
kinase inhibitor	15	0	1.43	-	0.24	0.37056
surfactant	15	0	1.43	-	0.24	0.37056
DNA-directed RNA polymerase	15	0	1.43	-	0.24	0.37056
major histocompatibility complex antigen	28	1	2.66	-	0.256	0.386
phospholipase	36	5	3.42	+	0.26	0.388992
immunoglobulin receptor superfamily	155	17	14.73	+	0.31	0.460231
DNA glycosylase	12	0	1.14	-	0.32	0.468714
adenylate cyclase	21	3	2	+	0.322	0.468714
glycosyltransferase	229	19	21.76	-	0.323	0.468714
transfer/carrier protein	248	26	23.57	+	0.334	0.478926
exoribonuclease	24	1	2.28	-	0.335	0.478926
cell adhesion molecule	93	7	8.84	-	0.343	0.483204
dehydratase	31	4	2.95	+	0.341	0.483204
phosphorylase	13	2	1.24	+	0.35	0.488748
tumor necrosis factor family member	11	0	1.05	-	0.352	0.488748
cytokine receptor	213	18	20.24	-	0.36	0.494135
ribonucleoprotein	61	7	5.8	+	0.361	0.494135
protein phosphatase	111	12	10.55	+	0.367	0.49881
cyclase	23	3	2.19	+	0.373	0.50342
aspartic protease	14	2	1.33	+	0.384	0.511582
mutase	14	2	1.33	+	0.384	0.511582
DNA-directed DNA polymerase	10	0	0.95	-	0.387	0.511582
cysteine protease	121	10	11.5	-	0.401	0.526483
nucleotidyltransferase	84	9	7.98	+	0.405	0.527188
cysteine protease inhibitor	21	1	2	-	0.407	0.527188
gap junction	21	1	2	-	0.407	0.527188
esterase	25	3	2.38	+	0.424	0.539638
carbohydrate phosphatase	9	0	0.86	-	0.425	0.539638
amylase	6	1	0.57	+	0.435	0.544135
DNA ligase	6	1	0.57	+	0.435	0.544135
mRNA processing factor	179	18	17.01	+	0.437	0.544135
carbohydrate transporter	46	5	4.37	+	0.443	0.548071
lipase	57	6	5.42	+	0.457	0.56179
tight junction	30	2	2.85	-	0.457	0.56179
protein kinase receptor	8	0	0.76	-	0.468	0.568075
neurotrophic factor	8	0	0.76	-	0.468	0.568075
decarboxylase	17	2	1.62	+	0.48	0.575404
DNA methyltransferase	17	2	1.62	+	0.48	0.575404
ubiquitin-protein ligase	132	13	12.54	+	0.486	0.575448
viral protein	7	0	0.67	-	0.514	0.584676
kinase modulator	103	10	9.79	+	0.515	0.584676
phosphatase inhibitor	28	2	2.66	-	0.503	0.584676
antibacterial response protein	18	2	1.71	+	0.51	0.584676
epimerase/racemase	7	0	0.67	-	0.514	0.584676
viral coat protein	7	0	0.67	-	0.514	0.584676
DNA strand-pairing protein	7	0	0.67	-	0.514	0.584676
replication origin binding protein	47	4	4.47	-	0.538	0.607216
acyltransferase	88	8	8.36	-	0.542	0.608174
cell junction protein	67	6	6.37	-	0.548	0.611353
phosphatase modulator	63	6	5.99	+	0.552	0.612276
sodium channel	20	2	1.9	+	0.567	0.62532
nuclease	35	3	3.33	-	0.575	0.63054
glucosidase	15	1	1.43	-	0.583	0.635701
histone	54	5	5.13	-	0.593	0.640458
chromatin/chromatin-binding protein	74	7	7.03	-	0.594	0.640458
helicase	5	0	0.48	-	0.622	0.666922
pyrophosphatase	5	0	0.48	-	0.622	0.666922
metalloprotease inhibitor	4	0	0.38	-	0.684	0.725341
DNA topoisomerase	4	0	0.38	-	0.684	0.725341
deacetylase	2	0	0.19	-	0.827	0.867451
calsequestrin	2	0	0.19	-	0.827	0.867451
TGF-beta receptor	2	0	0.19	-	0.827	0.867451
DNA polymerase processivity factor	2	0	0.19	-	0.827	0.867451
DNA photolyase	2	0	0.19	-	0.827	0.867451
exodeoxyribonuclease	1	0	0.1	-	0.909	0.928238
voltage-gated ion channel	1	0	0.1	-	0.909	0.928238
primase	1	0	0.1	-	0.909	0.928238
phosphatase activator	1	0	0.1	-	0.909	0.928238
reverse transcriptase	1	0	0.1	-	0.909	0.928238
