# Supplementary material for: Comparative Study of Human and Mouse Postsynaptic Proteomes Finds High Compositional Conservation and Abundance Differences for Key Synaptic Proteins
Source: PLoS One. 2012 Oct 5;7(10):e46683. doi: 10.1371/journal.pone.0046683 (PMC3465276; doi:10.1371/journal.pone.0046683)
Supplement: Table S9 — Pathway analysis of all PSD Proteins Identified in Human and Mouse. All human and mouse PSD proteins were classified together using the Panther ‘Pathway’ descriptor. An enrichment analysis was done to determine Pathways overrepresented compared with the human genome. The Benjamini-Hochberg procedure was used to correct for multiple testing. The column ‘observed’ retrieves the number of proteins identified in each ‘Pathway’ while the column ‘expected’, the number that would have been identified by chance. Over or under-representations are shown by a (+) or (−) symbol respectively. (XLSX) [file pone.0046683.s009.xlsx]

## Sheet: Legend
Table S9. Pathway analysis of All PSD Proteins Identified in Human and Mouse.
All human and mouse PSD proteins were classified together using the Panther 'Pathway' descriptor. An enrichment analysis was done to determine Pathways overrepresented compared with the human genome. The Benjamini-Hochberg procedure was used to correct for multiple testing. The column 'observed' retrieves the number of proteins identified in each 'Pathway' while the column 'expected', the number …

## Sheet: Table S9
	PSD vs Human Genome
Pathway	Observed	Expected	over/under	P-value	Corrected P-value
Metabotropic glutamate receptor group III pathway	44	6.94	+	3.09e-21	4.51e-19
Metabotropic glutamate receptor group II pathway	34	4.85	+	4.99e-18	3.64e-16
Muscarinic acetylcholine receptor 1 and 3 signaling pathway	35	5.8	+	1.44e-16	7.01e-15
Huntington disease	58	15.87	+	2e-16	7.3e-15
Ionotropic glutamate receptor pathway	32	5.13	+	1.18e-15	3.43e-14
Thyrotropin-releasing hormone receptor signaling pathway	34	5.89	+	1.41e-15	3.43e-14
Synaptic_vesicle_trafficking	27	3.61	+	2.81e-15	5.86e-14
Parkinson disease	42	9.5	+	6.06e-15	1.11e-13
Heterotrimeric G-protein signaling pathway-Gq alpha and Go alpha mediated pathway	48	12.73	+	2.52e-14	4.09e-13
Oxytocin receptor mediated signaling pathway	31	5.7	+	1.14e-13	1.66e-12
5HT2 type receptor mediated signaling pathway	33	6.56	+	1.51e-13	2e-12
Muscarinic acetylcholine receptor 2 and 4 signaling pathway	30	5.89	+	1.41e-12	1.72e-11
Histamine H1 receptor mediated signaling pathway	26	4.47	+	2.39e-12	2.68e-11
Beta2 adrenergic receptor signaling pathway	25	4.18	+	3.57e-12	3.72e-11
Beta1 adrenergic receptor signaling pathway	25	4.18	+	3.57e-12	3.72e-11
Inflammation mediated by chemokine and cytokine signaling pathway	69	26.89	+	5.42e-12	4.95e-11
Cortocotropin releasing factor receptor signaling pathway	20	2.85	+	3.2e-11	2.75e-10
Heterotrimeric G-protein signaling pathway-Gi alpha and Gs alpha mediated pathway	48	15.77	+	4.02e-11	3.26e-10
Cytoskeletal regulation by Rho GTPase	35	9.31	+	8.18e-11	6.29e-10
5HT1 type receptor mediated signaling pathway	23	4.18	+	1.27e-10	9.27e-10
5HT4 type receptor mediated signaling pathway	19	2.95	+	3.9e-10	2.71e-09
GABA-B_receptor_II_signaling	21	3.8	+	7.37e-10	4.89e-09
Beta3 adrenergic receptor signaling pathway	17	2.47	+	1.24e-09	7.87e-09
EGF receptor signaling pathway	39	12.83	+	2.66e-09	1.62e-08
Metabotropic glutamate receptor group I pathway	19	3.42	+	4.28e-09	2.5e-08
Unclassified	1560	1647.41	-	5.9e-09	3.31e-08
Alpha adrenergic receptor signaling pathway	17	3.04	+	2.5e-08	1.35e-07
Histamine H2 receptor mediated signaling pathway	15	2.38	+	3.47e-08	1.81e-07
Nicotinic acetylcholine receptor signaling pathway	30	9.22	+	4.11e-08	2.07e-07
Endogenous_cannabinoid_signaling	14	2.28	+	1.37e-07	6.67e-07
Glycolysis	14	2.38	+	2.23e-07	1.05e-06
Axon guidance mediated by semaphorins	18	4.09	+	3.2e-07	1.46e-06
Endothelin signaling pathway	27	8.65	+	4.2e-07	1.86e-06
Heterotrimeric G-protein signaling pathway-rod outer segment phototransduction	17	4.28	+	2.62e-06	1.13e-05
FGF signaling pathway	30	11.78	+	5.78e-06	2.41e-05
TCA cycle	10	1.62	+	7.62e-06	3.09e-05
Integrin signalling pathway	38	17.2	+	9.08e-06	3.58e-05
T cell activation	26	9.69	+	9.8e-06	3.77e-05
Wnt signaling pathway	56	30.12	+	1.33e-05	4.98e-05
PI3 kinase pathway	27	10.93	+	2.74e-05	0.0001
B cell activation	21	7.79	+	6.27e-05	0.000223
Ras Pathway	20	7.51	+	0.000108	0.000375
Cadherin signaling pathway	30	13.97	+	0.000122	0.000414
De novo purine biosynthesis	12	3.23	+	0.000138	0.000458
Hedgehog signaling pathway	10	2.38	+	0.000183	0.000594
Adrenaline and noradrenaline biosynthesis	11	3.04	+	0.000322	0.00102
5-Hydroxytryptamine degredation	8	1.9	+	0.000788	0.00245
Apoptosis signaling pathway	24	11.69	+	0.00101	0.00307
Angiogenesis	33	18.15	+	0.00103	0.00307
ATP synthesis	5	0.76	+	0.00113	0.0033
5HT3 type receptor mediated signaling pathway	7	1.71	+	0.00193	0.00553
VEGF signaling pathway	16	7.13	+	0.0028	0.00786
Pyrimidine Metabolism	6	1.43	+	0.00347	0.00946
PDGF signaling pathway	27	15.11	+	0.0035	0.00946
Ubiquitin proteasome pathway	15	6.65	+	0.00358	0.0095
Glutamine glutamate conversion	3	0.38	+	0.00689	0.018
Pentose phosphate pathway	4	0.76	+	0.00762	0.0195
Axon guidance mediated by Slit/Robo	6	1.9	+	0.0132	0.0332
Phenylethylamine degradation	4	0.95	+	0.0161	0.0398
Adenine and hypoxanthine salvage pathway	4	0.95	+	0.0161	0.0398
Alzheimer disease-amyloid secretase pathway	13	6.75	+	0.0207	0.0495
De novo pyrmidine ribonucleotides biosythesis	5	1.71	+	0.0302	0.0711
General transcription regulation	0	3.42	-	0.0326	0.0755
Phenylalanine biosynthesis	2	0.29	+	0.0337	0.0769
Arginine biosynthesis	3	0.76	+	0.0418	0.0939
Pyruvate metabolism	4	1.33	+	0.0461	0.102
Circadian clock system	3	0.86	+	0.0556	0.121
Tyrosine biosynthesis	2	0.38	+	0.0563	0.121
Proline biosynthesis	2	0.38	+	0.0563	0.121
FAS signaling pathway	7	3.42	+	0.0592	0.123
Insulin/IGF pathway-protein kinase B signaling cascade	4	8.46	-	0.0758	0.155
Oxidative stress response	2	5.7	-	0.0764	0.155
Serine glycine biosynthesis	2	0.48	+	0.0827	0.165
Asparagine and aspartate biosynthesis	2	0.48	+	0.0827	0.165
Triacylglycerol metabolism	1	0.1	+	0.0907	0.177
Anandamide_degradation	1	0.1	+	0.0907	0.177
Fructose galactose metabolism	3	1.14	+	0.108	0.205
Gamma-aminobutyric acid synthesis	2	0.57	+	0.112	0.21
Heme biosynthesis	3	1.24	+	0.128	0.237
General transcription by RNA polymerase I	0	1.9	-	0.149	0.272
Axon guidance mediated by netrin	5	2.85	+	0.16	0.288
Interleukin signaling pathway	11	15.3	-	0.165	0.292
Blood coagulation	2	4.56	-	0.166	0.292
Sulfate assimilation	1	0.19	+	0.173	0.297
Pyridoxal phosphate salvage pathway	1	0.19	+	0.173	0.297
Aminobutyrate degradation	1	0.19	+	0.173	0.297
Purine metabolism	2	0.76	+	0.177	0.297
Hypoxia response via HIF activation	1	3.04	-	0.193	0.32
Toll receptor signaling pathway	8	5.89	+	0.241	0.395
Vitamin B6 metabolism	1	0.29	+	0.248	0.402
De novo pyrimidine deoxyribonucleotide biosynthesis	3	1.81	+	0.271	0.435
Alzheimer disease-presenilin pathway	14	11.59	+	0.276	0.436
TGF-beta signaling pathway	11	13.78	-	0.278	0.436
Formyltetrahydroformate biosynthesis	2	1.05	+	0.281	0.436
Androgen/estrogene/progesterone biosynthesis	3	1.9	+	0.296	0.453
Interferon-gamma signaling pathway	4	2.76	+	0.298	0.453
p53 pathway by glucose deprivation	1	2.38	-	0.314	0.471
Methylmalonyl pathway	1	0.38	+	0.316	0.471
Ascorbate degradation	1	0.38	+	0.316	0.471
Cell cycle	3	2.09	+	0.348	0.506
Cholesterol biosynthesis	2	1.24	+	0.35	0.506
p53 pathway feedback loops 2	6	4.94	+	0.374	0.535
Salvage pyrimidine ribonucleotides	2	1.33	+	0.384	0.544
p53 pathway	12	10.74	+	0.389	0.546
DNA replication	1	2	-	0.407	0.566
mRNA splicing	0	0.86	-	0.425	0.577
Insulin/IGF pathway-mitogen activated protein kinase kinase/MAP kinase cascade	4	3.33	+	0.425	0.577
JAK/STAT signaling pathway	1	1.9	-	0.433	0.577
Transcription regulation by bZIP transcription factor	4	5.04	-	0.434	0.577
Xanthine and guanine salvage pathway	1	0.57	+	0.435	0.577
Coenzyme A biosynthesis	1	0.57	+	0.435	0.577
2-arachidonoylglycerol biosynthesis	1	0.67	+	0.486	0.634
Plasminogen activating cascade	2	1.71	+	0.51	0.658
N-acetylglucosamine metabolism	0	0.67	-	0.514	0.658
Mannose metabolism	0	0.67	-	0.514	0.658
P53 pathway feedback loops 1	0	0.67	-	0.514	0.658
Notch signaling pathway	4	4.47	-	0.538	0.671
Folate biosynthesis	0	0.57	-	0.565	0.699
5-Hydroxytryptamine biosynthesis	0	0.57	-	0.565	0.699
Vitamin D metabolism and pathway	1	1.33	-	0.616	0.749
Salvage pyrimidine deoxyribonucleotides	0	0.38	-	0.684	0.825
O-antigen biosynthesis	0	0.38	-	0.684	0.825
Methylcitrate cycle	0	0.38	-	0.684	0.825
Vasopressin synthesis	1	1.14	-	0.684	0.825
Valine biosynthesis	0	0.29	-	0.752	0.878
S adenosyl methionine biosynthesis	0	0.29	-	0.752	0.878
Ornithine degradation	0	0.29	-	0.752	0.878
Isoleucine biosynthesis	0	0.29	-	0.752	0.878
Acetate utilization	0	0.29	-	0.752	0.878
Threonine biosynthesis	0	0.19	-	0.827	0.929
Thiamine metabolism	0	0.19	-	0.827	0.929
Succinate to proprionate conversion	0	0.19	-	0.827	0.929
PLP biosynthesis	0	0.19	-	0.827	0.929
Lysine biosynthesis	0	0.19	-	0.827	0.929
Lipoate_biosynthesis	0	0.19	-	0.827	0.929
Leucine biosynthesis	0	0.19	-	0.827	0.929
Carnitine metabolism	0	0.19	-	0.827	0.929
Carnitine and CoA metabolism	0	0.19	-	0.827	0.929
Histamine synthesis	0	0.19	-	0.827	0.929
Alanine biosynthesis	0	0.19	-	0.827	0.929
Bupropion_degradation	0	0.1	-	0.909	0.941
Methionine biosynthesis	0	0.1	-	0.909	0.941
Flavin biosynthesis	0	0.1	-	0.909	0.941
Cysteine biosynthesis	0	0.1	-	0.909	0.941
Cobalamin biosynthesis	0	0.1	-	0.909	0.941
Allantoin degradation	0	0.1	-	0.909	0.941
