# Supplementary material for: Comparative Study of Human and Mouse Postsynaptic Proteomes Finds High Compositional Conservation and Abundance Differences for Key Synaptic Proteins
Source: PLoS One. 2012 Oct 5;7(10):e46683. doi: 10.1371/journal.pone.0046683 (PMC3465276; doi:10.1371/journal.pone.0046683)
Supplement: Table S10 — Analysis of dN/dS values from mouse and human PSD proteins. dN, dS, dN/dS and median dN/dS values are given for proteins found in human and mouse cortical PSD, and proteins exclusive or significantly enriched to each species' PSD. All values were obtained from Ensembl 62. (XLS) [file pone.0046683.s010.xls]

## Sheet: Legend
Table S10. Analysis of dN/dS values from mouse and human PSD proteins.
dN, dS, dN/dS and median dN/dS values are given for proteins found in human and mouse cortical PSD, and proteins exclusive or significantly enriched to each species’ PSD. All values were obtained from Ensembl 62.

## Sheet: Table S10
Human Cortex (Nat Neurosci. 2011 Jan;14(1):19-21)								Mouse Cortex_PSD_2011								Identified only in human PSD								Identified only in mouse PSD								Enriched in Human PSD								Enriched in Mouse PSD
Ensembl Gene ID	Mouse Ensembl Gene ID	dN	dS	dN/dS		dN/dS Median		Ensembl Gene ID	Human Ensembl Gene ID	dN	dS	dN/dS		dN/dS Median		Ensembl Gene ID	Mouse Ensembl Gene ID	dN	dS	dN/dS		dN/dS Median		Ensembl Gene ID	Mouse Ensembl Gene ID	dN	dS	dN/dS		dN/dS Median		Ensembl Gene ID	Human Ensembl Gene ID	dN	dS	dN/dS		dN/dS Median		Ensembl Gene ID	Human Ensembl Gene ID	dN	dS	dN/dS		dN/dS Median
ENSG00000121083	ENSMUSG00000020483	0	0.0817	0		0.0454321		ENSMUSG00000020483	ENSG00000121083	0	0.0817	0		0.0415381		ENSG00000108518	ENSMUSG00000018293	0.0188	0.2138	0.0879326		0.0674761		ENSG00000123091	ENSMUSG00000028557	0.003	0.1131	0.0265252		0.0492009		ENSMUSG00000004849	ENSG00000106367	0	0.6521	0		0.0203242		ENSMUSG00000023944	ENSG00000096384	0.0018	0.7489	0.00240353		0.0352332
ENSG00000197111	ENSMUSG00000056851	0	0.1043	0				ENSMUSG00000056851	ENSG00000197111	0	0.1043	0				ENSG00000108671	ENSMUSG00000017428	0.0012	0.2141	0.00560486				ENSG00000112531	ENSMUSG00000062078	0	0.1417	0				ENSMUSG00000020149	ENSG00000138069	0	0.1842	0				ENSMUSG00000004455	ENSG00000186298	0.0014	0.4273	0.00327639
ENSG00000124785	ENSMUSG00000039114	0.0127	0.1058	0.120038				ENSMUSG00000039114	ENSG00000124785	0.0127	0.1058	0.120038				ENSG00000123728	ENSMUSG00000050029	0	0.2257	0				ENSG00000146006	ENSMUSG00000071862	0.0085	0.1585	0.0536278				ENSMUSG00000022884	ENSG00000156976	0	0.2833	0				ENSMUSG00000021820	ENSG00000148660	0.0009	0.2708	0.00332349
ENSG00000123560	ENSMUSG00000031425	0	0.1147	0				ENSMUSG00000028557	ENSG00000123091	0.003	0.1131	0.0265252				ENSG00000175130	ENSMUSG00000047945	0.0202	0.2348	0.0860307				ENSG00000198492	ENSMUSG00000040025	0.0017	0.1666	0.0102041				ENSMUSG00000026797	ENSG00000136854	0	0.5646	0				ENSMUSG00000072214	ENSG00000184702	0.0044	1.179	0.00373198
ENSG00000107758	ENSMUSG00000021816	0.0035	0.1603	0.0218341				ENSMUSG00000031425	ENSG00000123560	0	0.1147	0				ENSG00000153310	ENSMUSG00000022378	0.0014	0.2568	0.00545171				ENSG00000154001	ENSMUSG00000021051	0.001	0.1675	0.00597015				ENSMUSG00000027438	ENSG00000125814	0	0.5154	0				ENSMUSG00000025892	ENSG00000152578	0.0015	0.3846	0.00390016
ENSG00000070831	ENSMUSG00000006699	0	0.1723	0				ENSMUSG00000062078	ENSG00000112531	0	0.1417	0				ENSG00000141279	ENSMUSG00000001441	0.0108	0.2652	0.040724				ENSG00000102081	ENSMUSG00000000838	0.0136	0.1939	0.0701392				ENSMUSG00000031425	ENSG00000123560	0	0.1147	0				ENSMUSG00000043991	ENSG00000185129	0.0012	0.2722	0.00440852
ENSG00000138069	ENSMUSG00000020149	0	0.1842	0				ENSMUSG00000071862	ENSG00000146006	0.0085	0.1585	0.0536278				ENSG00000099246	ENSMUSG00000073639	0.0045	0.2669	0.0168602				ENSG00000073921	ENSMUSG00000039361	0.0114	0.2191	0.052031				ENSMUSG00000054459	ENSG00000163032	0	0.5023	0				ENSMUSG00000026959	ENSG00000176884	0.0041	0.7495	0.00547031
ENSG00000102069	ENSMUSG00000059585	0.068	0.1853	0.366972				ENSMUSG00000021816	ENSG00000107758	0.0035	0.1603	0.0218341				ENSG00000156976	ENSMUSG00000022884	0	0.2833	0				ENSG00000114416	ENSMUSG00000027680	0.0086	0.2251	0.0382052				ENSMUSG00000055723	ENSG00000133818	0	0.3523	0				ENSMUSG00000015143	ENSG00000072110	0.0039	0.5925	0.00658228
ENSG00000147044	ENSMUSG00000031012	0.0005	0.1924	0.00259875				ENSMUSG00000040025	ENSG00000198492	0.0017	0.1666	0.0102041				ENSG00000138430	ENSMUSG00000027108	0.0024	0.3022	0.00794176				ENSG00000116667	ENSMUSG00000032666	0.0193	0.2275	0.0848352				ENSMUSG00000036752	ENSG00000188229	0.0008	0.7997	0.00100038				ENSMUSG00000035390	ENSG00000160469	0.004	0.4793	0.0083455
ENSG00000125675	ENSMUSG00000001986	0.0032	0.194	0.0164948				ENSMUSG00000021051	ENSG00000154001	0.001	0.1675	0.00597015				ENSG00000174238	ENSMUSG00000017781	0.005	0.3078	0.0162443				ENSG00000134108	ENSMUSG00000030105	0	0.2387	0				ENSMUSG00000037742	ENSG00000156508	0.001	0.4075	0.00245399				ENSMUSG00000066392	ENSG00000021645	0.0046	0.5253	0.0087569
ENSG00000165410	ENSMUSG00000062929	0.0027	0.2026	0.0133268				ENSMUSG00000006699	ENSG00000070831	0	0.1723	0				ENSG00000102144	ENSMUSG00000062070	0.0108	0.3088	0.0349741				ENSG00000139190	ENSMUSG00000030337	0.0083	0.255	0.032549				ENSMUSG00000059970	ENSG00000126803	0.0019	0.7296	0.00260417				ENSMUSG00000061751	ENSG00000160145	0.0049	0.4947	0.00990499
ENSG00000070756	ENSMUSG00000022283	0.0014	0.2082	0.0067243				ENSMUSG00000020149	ENSG00000138069	0	0.1842	0				ENSG00000112335	ENSMUSG00000019804	0	0.3102	0				ENSG00000151846	ENSMUSG00000022283	0.0376	0.2588	0.145286				ENSMUSG00000020114	ENSG00000111530	0.0027	0.5551	0.00486399				ENSMUSG00000000881	ENSG00000082458	0.0033	0.3224	0.0102357
ENSG00000084733	ENSMUSG00000020671	0	0.213	0				ENSMUSG00000031012	ENSG00000147044	0.0005	0.1924	0.00259875				ENSG00000131779	ENSMUSG00000028102	0.0394	0.3106	0.126851				ENSG00000048740	ENSMUSG00000002107	0.0361	0.2596	0.13906				ENSMUSG00000034160	ENSG00000147162	0.0018	0.3689	0.00487937				ENSMUSG00000039809	ENSG00000136928	0.0088	0.7527	0.0116912
ENSG00000108518	ENSMUSG00000018293	0.0188	0.2138	0.0879326				ENSMUSG00000000838	ENSG00000102081	0.0136	0.1939	0.0701392				ENSG00000175073	ENSMUSG00000045210	0.0217	0.3113	0.0697077				ENSG00000149970	ENSMUSG00000025658	0.0054	0.2634	0.0205011				ENSMUSG00000022378	ENSG00000153310	0.0014	0.2568	0.00545171				ENSMUSG00000043460	ENSG00000166897	0.017	1.2052	0.0141055
ENSG00000108671	ENSMUSG00000017428	0.0012	0.2141	0.00560486				ENSMUSG00000001986	ENSG00000125675	0.0032	0.194	0.0164948				ENSG00000088833	ENSMUSG00000027455	0.0182	0.3124	0.0582586				ENSG00000196792	ENSMUSG00000020954	0.0189	0.265	0.0713208				ENSMUSG00000061981	ENSG00000132589	0.0032	0.5667	0.00564673				ENSMUSG00000024743	ENSG00000011347	0.0082	0.5541	0.0147988
ENSG00000135316	ENSMUSG00000032423	0.0088	0.2221	0.0396218				ENSMUSG00000062929	ENSG00000165410	0.0027	0.2026	0.0133268				ENSG00000068366	ENSMUSG00000031278	0.0147	0.3126	0.047025				ENSG00000165527	ENSMUSG00000044147	0	0.2657	0				ENSMUSG00000021270	ENSG00000080824	0.0036	0.61	0.00590164				ENSMUSG00000040640	ENSG00000187672	0.0084	0.5661	0.0148384
ENSG00000132639	ENSMUSG00000027273	0	0.2223	0				ENSMUSG00000006456	ENSG00000239306	0.0087	0.2036	0.0427308				ENSG00000110344	ENSMUSG00000059890	0.0153	0.3173	0.0482194				ENSG00000113558	ENSMUSG00000036309	0.0027	0.2673	0.010101				ENSMUSG00000039615	ENSG00000103266	0.0098	1.238	0.00791599				ENSMUSG00000041115	ENSG00000124313	0.0047	0.3121	0.0150593
ENSG00000177879	ENSMUSG00000074154	0.0096	0.2239	0.0428763				ENSMUSG00000022283	ENSG00000070756	0.0014	0.2082	0.0067243				ENSG00000079332	ENSMUSG00000020088	0.0023	0.3187	0.00721682				ENSG00000046653	ENSMUSG00000031342	0.0084	0.2705	0.0310536				ENSMUSG00000018965	ENSG00000128245	0.0036	0.3628	0.00992282				ENSMUSG00000001986	ENSG00000125675	0.0032	0.194	0.0164948
ENSG00000123728	ENSMUSG00000050029	0	0.2257	0				ENSMUSG00000020671	ENSG00000084733	0	0.213	0				ENSG00000147164	ENSMUSG00000046032	0.0055	0.3204	0.017166				ENSG00000156709	ENSMUSG00000036932	0.043	0.2744	0.156706				ENSMUSG00000057322	ENSG00000172809	0.0065	0.6395	0.0101642				ENSMUSG00000017412	ENSG00000182389	0.008	0.4756	0.0168209
ENSG00000177879	ENSMUSG00000024480	0.0002	0.2275	0.000879121				ENSMUSG00000039361	ENSG00000073921	0.0114	0.2191	0.052031				ENSG00000162734	ENSMUSG00000013698	0.0032	0.3234	0.00989487				ENSG00000108654	ENSMUSG00000020719	0.0036	0.289	0.0124567				ENSMUSG00000030246	ENSG00000111716	0.0101	0.8754	0.0115376				ENSMUSG00000071073	ENSG00000204052	0.0058	0.3194	0.018159
ENSG00000101266	ENSMUSG00000074698	0.0059	0.2277	0.0259113				ENSMUSG00000032423	ENSG00000135316	0.0088	0.2221	0.0396218				ENSG00000111540	ENSMUSG00000000711	0	0.3237	0				ENSG00000177301	ENSMUSG00000040724	0.0027	0.2894	0.00932965				ENSMUSG00000029581	ENSG00000075618	0.0146	1.2161	0.0120056				ENSMUSG00000021991	ENSG00000157445	0.0093	0.5089	0.0182747
ENSG00000119782	ENSMUSG00000020635	0.0129	0.2297	0.0561602				ENSMUSG00000027273	ENSG00000132639	0	0.2223	0				ENSG00000158882	ENSMUSG00000005674	0.0108	0.3249	0.033241				ENSG00000126950	ENSMUSG00000033578	0.0143	0.2916	0.0490398				ENSMUSG00000059714	ENSG00000137312	0.0074	0.6061	0.0122092				ENSMUSG00000047013	ENSG00000163013	0.0133	0.7097	0.0187403
ENSG00000171723	ENSMUSG00000047454	0.0061	0.234	0.0260684				ENSMUSG00000027680	ENSG00000114416	0.0086	0.2251	0.0382052				ENSG00000095139	ENSMUSG00000032096	0.0046	0.33	0.0139394				ENSG00000109171	ENSMUSG00000036087	0.0309	0.2934	0.105317				ENSMUSG00000026737	ENSG00000150867	0.0078	0.6142	0.0126994				ENSMUSG00000018765	ENSG00000129245	0.0077	0.3774	0.0204028
ENSG00000175130	ENSMUSG00000047945	0.0202	0.2348	0.0860307				ENSMUSG00000024480	ENSG00000177879	0.0002	0.2275	0.000879121				ENSG00000101367	ENSMUSG00000027479	0.0164	0.3311	0.0495319				ENSG00000188215	ENSMUSG00000048787	0.0104	0.2941	0.0353621				ENSMUSG00000031207	ENSG00000147065	0.006	0.4717	0.0127199				ENSMUSG00000030172	ENSG00000082805	0.0128	0.5522	0.02318
ENSG00000169139	ENSMUSG00000060811	0.0652	0.2353	0.277093				ENSMUSG00000032666	ENSG00000116667	0.0193	0.2275	0.0848352				ENSG00000091164	ENSMUSG00000024583	0.0064	0.337	0.0189911				ENSG00000184083	ENSMUSG00000025262	0.0395	0.2958	0.133536				ENSMUSG00000022048	ENSG00000092964	0.0056	0.4314	0.012981				ENSMUSG00000022763	ENSG00000183773	0.0183	0.78	0.0234615
ENSG00000213639	ENSMUSG00000014956	0	0.2364	0				ENSMUSG00000074698	ENSG00000101266	0.0059	0.2277	0.0259113				ENSG00000169891	ENSMUSG00000040855	0.0625	0.3379	0.184966				ENSG00000142864	ENSMUSG00000036371	0.0266	0.2964	0.0897436				ENSMUSG00000014602	ENSG00000130294	0.0111	0.7975	0.0139185				ENSMUSG00000033981	ENSG00000120251	0.0083	0.3467	0.02394
ENSG00000070770	ENSMUSG00000046707	0.005	0.2404	0.0207987				ENSMUSG00000020635	ENSG00000119782	0.0129	0.2297	0.0561602				ENSG00000134444	ENSMUSG00000026319	0.0367	0.3411	0.107593				ENSG00000170471	ENSMUSG00000027652	0.0123	0.2985	0.041206				ENSMUSG00000022789	ENSG00000087470	0.006	0.4124	0.014549				ENSMUSG00000024969	ENSG00000072518	0.0079	0.327	0.024159
ENSG00000126861	ENSMUSG00000049612	0.0632	0.2412	0.262023				ENSMUSG00000047454	ENSG00000171723	0.0061	0.234	0.0260684				ENSG00000170624	ENSMUSG00000020354	0.0273	0.347	0.0786744				ENSG00000122566	ENSMUSG00000004980	0.0027	0.2986	0.0090422				ENSMUSG00000024501	ENSG00000113657	0.0072	0.483	0.0149068				ENSMUSG00000067629	ENSG00000197283	0.0111	0.4581	0.0242305
ENSG00000101558	ENSMUSG00000024091	0.013	0.2413	0.0538748				ENSMUSG00000014956	ENSG00000213639	0	0.2364	0				ENSG00000205302	ENSMUSG00000034484	0.0098	0.3472	0.0282258				ENSG00000196338	ENSMUSG00000031302	0.0045	0.3041	0.0147978				ENSMUSG00000054423	ENSG00000163618	0.0065	0.4227	0.0153773				ENSMUSG00000020827	ENSG00000141503	0.0118	0.476	0.0247899
ENSG00000115233	ENSMUSG00000026914	0	0.2442	0				ENSMUSG00000030105	ENSG00000134108	0	0.2387	0				ENSG00000159348	ENSMUSG00000026456	0.0428	0.3474	0.123201				ENSG00000144320	ENSMUSG00000009207	0.0745	0.3047	0.244503				ENSMUSG00000015291	ENSG00000203879	0.0092	0.5061	0.0181782				ENSMUSG00000038453	ENSG00000017373	0.017	0.6555	0.0259344
ENSG00000110367	ENSMUSG00000032097	0.0108	0.2455	0.0439919				ENSMUSG00000046707	ENSG00000070770	0.005	0.2404	0.0207987				ENSG00000119711	ENSMUSG00000021238	0.0246	0.3506	0.0701654				ENSG00000155744	ENSMUSG00000038174	0.0238	0.3078	0.0773229				ENSMUSG00000004267	ENSG00000111674	0.0083	0.4236	0.019594				ENSMUSG00000047454	ENSG00000171723	0.0061	0.234	0.0260684
ENSG00000169139	ENSMUSG00000022674	0.0059	0.254	0.0232283				ENSMUSG00000049612	ENSG00000126861	0.0632	0.2412	0.262023				ENSG00000124486	ENSMUSG00000031010	0.0072	0.3512	0.0205011				ENSG00000204469	ENSMUSG00000024393	0.0545	0.3079	0.177006				ENSMUSG00000041329	ENSG00000129244	0.0121	0.5747	0.0210545				ENSMUSG00000020612	ENSG00000108946	0.016	0.6073	0.0263461
ENSG00000153310	ENSMUSG00000022378	0.0014	0.2568	0.00545171				ENSMUSG00000024091	ENSG00000101558	0.013	0.2413	0.0538748				ENSG00000134001	ENSMUSG00000021116	0.0042	0.3513	0.0119556				ENSG00000146147	ENSMUSG00000032355	0.1882	0.309	0.609061				ENSMUSG00000001270	ENSG00000166165	0.0184	0.8655	0.0212594				ENSMUSG00000029516	ENSG00000122966	0.0152	0.5522	0.0275263
ENSG00000067560	ENSMUSG00000007815	0.0025	0.2593	0.00964134				ENSMUSG00000026914	ENSG00000115233	0	0.2442	0				ENSG00000130227	ENSMUSG00000022100	0.0027	0.3518	0.00767482				ENSG00000186479	ENSMUSG00000021719	0.0249	0.3106	0.0801674				ENSMUSG00000022674	ENSG00000169139	0.0059	0.254	0.0232283				ENSMUSG00000007617	ENSG00000152413	0.0111	0.3996	0.0277778
ENSG00000143376	ENSMUSG00000028136	0.0099	0.2608	0.0379601				ENSMUSG00000032097	ENSG00000110367	0.0108	0.2455	0.0439919				ENSG00000162368	ENSMUSG00000028719	0.0422	0.3535	0.119378				ENSG00000167258	ENSMUSG00000003119	0.0426	0.3111	0.136933				ENSMUSG00000026728	ENSG00000026025	0.0111	0.4681	0.0237129				ENSMUSG00000030376	ENSG00000118160	0.0254	0.9112	0.0278753
ENSG00000092841	ENSMUSG00000060680	0.0203	0.2612	0.0777182				ENSMUSG00000022674	ENSG00000169139	0.0059	0.254	0.0232283				ENSG00000157500	ENSMUSG00000040760	0.0078	0.3564	0.0218855				ENSG00000184831	ENSMUSG00000079508	0.1011	0.3127	0.323313				ENSMUSG00000040276	ENSG00000124507	0.0201	0.84	0.0239286				ENSMUSG00000037703	ENSG00000088899	0.021	0.7118	0.0295027
ENSG00000105372	ENSMUSG00000072528	0.01	0.2613	0.0382702				ENSMUSG00000030337	ENSG00000139190	0.0083	0.255	0.032549				ENSG00000025772	ENSMUSG00000018322	0.0585	0.3608	0.16214				ENSG00000184831	ENSMUSG00000049233	0.1011	0.3127	0.323313				ENSMUSG00000029121	ENSG00000072832	0.0157	0.6366	0.0246623				ENSMUSG00000044667	ENSG00000117600	0.018	0.5861	0.0307115
ENSG00000116473	ENSMUSG00000068798	0	0.2642	0				ENSMUSG00000022283	ENSG00000151846	0.0376	0.2588	0.145286				ENSG00000174373	ENSMUSG00000021027	0.0252	0.3646	0.0691168				ENSG00000182134	ENSMUSG00000041912	0.0465	0.3134	0.148373				ENSMUSG00000021573	ENSG00000171368	0.0369	1.486	0.0248318				ENSMUSG00000000202	ENSG00000204347	0.0347	1.1077	0.0313262
ENSG00000141279	ENSMUSG00000001441	0.0108	0.2652	0.040724				ENSMUSG00000007815	ENSG00000067560	0.0025	0.2593	0.00964134				ENSG00000115866	ENSMUSG00000026356	0.0183	0.3647	0.0501782				ENSG00000048828	ENSMUSG00000038014	0.0157	0.3191	0.0492009				ENSMUSG00000031865	ENSG00000204843	0.0145	0.502	0.0288845				ENSMUSG00000003279	ENSG00000170579	0.0178	0.5573	0.0319397
ENSG00000163466	ENSMUSG00000006304	0.003	0.2663	0.0112655				ENSMUSG00000002107	ENSG00000048740	0.0361	0.2596	0.13906				ENSG00000100591	ENSMUSG00000021037	0.0249	0.3649	0.0682379				ENSG00000204842	ENSMUSG00000042605	0.0564	0.3203	0.176085				ENSMUSG00000024277	ENSG00000166974	0.0125	0.4283	0.0291852				ENSMUSG00000061689	ENSG00000080845	0.0184	0.5601	0.0328513
ENSG00000099246	ENSMUSG00000073639	0.0045	0.2669	0.0168602				ENSMUSG00000028136	ENSG00000143376	0.0099	0.2608	0.0379601				ENSG00000205544	ENSMUSG00000070394	0.0628	0.3697	0.169867				ENSG00000085832	ENSMUSG00000028552	0.0585	0.3215	0.18196				ENSMUSG00000022477	ENSG00000100412	0.0158	0.5347	0.0295493				ENSMUSG00000022623	ENSG00000251322	0.0231	0.6816	0.0338908
ENSG00000119396	ENSMUSG00000026878	0	0.2681	0				ENSMUSG00000060680	ENSG00000092841	0.0203	0.2612	0.0777182				ENSG00000100462	ENSMUSG00000023110	0.0095	0.3702	0.0256618				ENSG00000162374	ENSMUSG00000028546	0.0104	0.3215	0.0323484				ENSMUSG00000025139	ENSG00000078902	0.0337	1.1253	0.0299476				ENSMUSG00000034593	ENSG00000197535	0.0148	0.4356	0.0339761
ENSG00000109919	ENSMUSG00000027282	0.0376	0.2689	0.139829				ENSMUSG00000025658	ENSG00000149970	0.0054	0.2634	0.0205011				ENSG00000168807	ENSMUSG00000041308	0.0171	0.3711	0.0460792				ENSG00000198947	ENSMUSG00000045103	0.0439	0.3215	0.136547				ENSMUSG00000035770	ENSG00000135720	0.0146	0.3996	0.0365365				ENSMUSG00000047495	ENSG00000198010	0.0519	1.4223	0.0364902
ENSG00000156482	ENSMUSG00000058600	0	0.2707	0				ENSMUSG00000068798	ENSG00000116473	0	0.2642	0				ENSG00000204463	ENSMUSG00000024392	0.0294	0.3717	0.079096				ENSG00000138757	ENSMUSG00000029405	0.0074	0.3226	0.0229386				ENSMUSG00000015747	ENSG00000136631	0.0145	0.3764	0.0385228				ENSMUSG00000024077	ENSG00000115808	0.0161	0.4409	0.0365162
ENSG00000148660	ENSMUSG00000021820	0.0009	0.2708	0.00332349				ENSMUSG00000020954	ENSG00000196792	0.0189	0.265	0.0713208				ENSG00000198648	ENSMUSG00000027030	0.021	0.3719	0.0564668				ENSG00000092847	ENSMUSG00000041530	0.0003	0.3254	0.000921942				ENSMUSG00000037601	ENSG00000239672	0.0295	0.716	0.0412011				ENSMUSG00000053550	ENSG00000187902	0.0336	0.8709	0.0385808
ENSG00000105372	ENSMUSG00000071476	0.0133	0.2721	0.0488791				ENSMUSG00000044147	ENSG00000165527	0	0.2657	0				ENSG00000035403	ENSMUSG00000021823	0.0031	0.3723	0.00832662				ENSG00000155970	ENSMUSG00000039478	0.038	0.3281	0.115818				ENSMUSG00000066235	ENSG00000144647	0.0302	0.7156	0.0422023				ENSMUSG00000059003	ENSG00000183454	0.0229	0.5876	0.0389721
ENSG00000105372	ENSMUSG00000072548	0.0133	0.2721	0.0488791				ENSMUSG00000006304	ENSG00000163466	0.003	0.2663	0.0112655				ENSG00000132142	ENSMUSG00000020532	0.0113	0.3727	0.0303193				ENSG00000131089	ENSMUSG00000025656	0.009	0.3313	0.0271657				ENSMUSG00000062444	ENSG00000103723	0.0243	0.5369	0.0452598				ENSMUSG00000037605	ENSG00000150471	0.019	0.4742	0.0400675
ENSG00000185129	ENSMUSG00000043991	0.0012	0.2722	0.00440852				ENSMUSG00000036309	ENSG00000113558	0.0027	0.2673	0.010101				ENSG00000165795	ENSMUSG00000004558	0.0227	0.3811	0.0595644				ENSG00000109606	ENSMUSG00000029169	0.0017	0.3342	0.00508677				ENSMUSG00000020932	ENSG00000131095	0.0372	0.7595	0.0489796				ENSMUSG00000014932	ENSG00000176105	0.0173	0.4174	0.0414471
ENSG00000122545	ENSMUSG00000001833	0.0039	0.2747	0.0141973				ENSMUSG00000026878	ENSG00000119396	0	0.2681	0				ENSG00000099942	ENSMUSG00000006134	0.0159	0.3832	0.0414927				ENSG00000147010	ENSMUSG00000040990	0.0278	0.3349	0.0830099				ENSMUSG00000001924	ENSG00000130985	0.0228	0.4641	0.0491273				ENSMUSG00000061576	ENSG00000130226	0.0356	0.8467	0.0420456
ENSG00000099783	ENSMUSG00000059208	0.0116	0.2747	0.0422279				ENSMUSG00000027282	ENSG00000109919	0.0376	0.2689	0.139829				ENSG00000060237	ENSMUSG00000045962	0.0761	0.3833	0.198539				ENSG00000121774	ENSMUSG00000028790	0.0274	0.3353	0.0817179				ENSMUSG00000028480	ENSG00000122694	0.0331	0.5882	0.0562734				ENSMUSG00000031292	ENSG00000008086	0.0208	0.4894	0.042501
ENSG00000075391	ENSMUSG00000070565	0.0145	0.2753	0.0526698				ENSMUSG00000031342	ENSG00000046653	0.0084	0.2705	0.0310536				ENSG00000119787	ENSMUSG00000059811	0.0113	0.3845	0.0293888				ENSG00000137094	ENSMUSG00000036052	0.0038	0.3356	0.011323				ENSMUSG00000053398	ENSG00000092621	0.0302	0.5289	0.0570996				ENSMUSG00000067242	ENSG00000108231	0.0144	0.3247	0.0443486
ENSG00000147649	ENSMUSG00000022255	0.0428	0.2753	0.155467				ENSMUSG00000058600	ENSG00000156482	0	0.2707	0				ENSG00000120265	ENSMUSG00000019795	0.0209	0.3856	0.0542012				ENSG00000033170	ENSMUSG00000021065	0.0163	0.3361	0.0484975				ENSMUSG00000002504	ENSG00000065054	0.0395	0.6812	0.0579859				ENSMUSG00000020321	ENSG00000014641	0.0188	0.3945	0.0476553
ENSG00000135486	ENSMUSG00000046434	0.0013	0.2756	0.00471698				ENSMUSG00000021820	ENSG00000148660	0.0009	0.2708	0.00332349				ENSG00000167004	ENSMUSG00000027248	0.0363	0.3862	0.0939927				ENSG00000135823	ENSMUSG00000026470	0.0305	0.3376	0.0903436				ENSMUSG00000032382	ENSG00000028528	0.0249	0.4228	0.0588931				ENSMUSG00000063160	ENSG00000105245	0.0222	0.4593	0.0483344
ENSG00000065135	ENSMUSG00000000001	0.0079	0.2774	0.0284787				ENSMUSG00000043991	ENSG00000185129	0.0012	0.2722	0.00440852				ENSG00000089006	ENSMUSG00000027423	0.0081	0.3916	0.0206844				ENSG00000156113	ENSMUSG00000063142	0.0074	0.344	0.0215116				ENSMUSG00000073838	ENSG00000178952	0.0349	0.5743	0.0607696				ENSMUSG00000022770	ENSG00000075711	0.0213	0.4152	0.0513006
ENSG00000092841	ENSMUSG00000090841	0	0.2779	0				ENSMUSG00000036932	ENSG00000156709	0.043	0.2744	0.156706				ENSG00000117592	ENSMUSG00000026701	0.0671	0.3975	0.168805				ENSG00000135387	ENSMUSG00000027184	0.014	0.3442	0.040674				ENSMUSG00000029028	ENSG00000130764	0.0678	1.0048	0.0674761				ENSMUSG00000070565	ENSG00000075391	0.0145	0.2753	0.0526698
ENSG00000168710	ENSMUSG00000027893	0	0.2832	0				ENSMUSG00000001833	ENSG00000122545	0.0039	0.2747	0.0141973				ENSG00000187118	ENSMUSG00000039163	0.0515	0.398	0.129397				ENSG00000136950	ENSMUSG00000026755	0.0152	0.3442	0.0441604				ENSMUSG00000005981	ENSG00000126602	0.059	0.8247	0.0715412				ENSMUSG00000042388	ENSG00000116544	0.0164	0.31	0.0529032
ENSG00000156976	ENSMUSG00000022884	0	0.2833	0				ENSMUSG00000059208	ENSG00000099783	0.0116	0.2747	0.0422279				ENSG00000167699	ENSMUSG00000017286	0.0448	0.4002	0.111944				ENSG00000112697	ENSMUSG00000032328	0.0604	0.345	0.175072				ENSMUSG00000030774	ENSG00000149269	0.0323	0.4086	0.0790504				ENSMUSG00000026991	ENSG00000144283	0.0172	0.3142	0.0547422
ENSG00000138443	ENSMUSG00000026782	0.0041	0.2871	0.0142807				ENSMUSG00000070565	ENSG00000075391	0.0145	0.2753	0.0526698				ENSG00000169764	ENSMUSG00000001891	0.0053	0.4002	0.0132434				ENSG00000147140	ENSMUSG00000031311	0.004	0.345	0.0115942				ENSMUSG00000027248	ENSG00000167004	0.0363	0.3862	0.0939927				ENSMUSG00000022103	ENSG00000168546	0.0279	0.5026	0.0555113
ENSG00000108953	ENSMUSG00000020849	0	0.2889	0				ENSMUSG00000022255	ENSG00000147649	0.0428	0.2753	0.155467				ENSG00000165434	ENSMUSG00000030729	0.0314	0.4018	0.0781483				ENSG00000092531	ENSMUSG00000027287	0.0654	0.3459	0.189072				ENSMUSG00000028249	ENSG00000137575	0.0504	0.5001	0.10078				ENSMUSG00000040867	ENSG00000183092	0.0559	0.9731	0.0574453
ENSG00000105372	ENSMUSG00000040952	0.0033	0.2923	0.0112898				ENSMUSG00000046434	ENSG00000135486	0.0013	0.2756	0.00471698				ENSG00000140600	ENSMUSG00000030638	0.0748	0.4024	0.185885				ENSG00000166579	ENSMUSG00000018736	0.0192	0.3462	0.0554593				ENSMUSG00000038173	ENSG00000164303	0.0738	0.6733	0.109609				ENSMUSG00000021357	ENSG00000112685	0.0334	0.5696	0.0586376
ENSG00000178741	ENSMUSG00000000088	0.0742	0.2928	0.253415				ENSMUSG00000000001	ENSG00000065135	0.0079	0.2774	0.0284787				ENSG00000106771	ENSMUSG00000055296	0.0396	0.4049	0.0978019				ENSG00000102225	ENSMUSG00000031065	0.0124	0.3478	0.0356527				ENSMUSG00000030884	ENSG00000140740	0.077	0.4502	0.171035				ENSMUSG00000025422	ENSG00000135439	0.024	0.4026	0.0596125
ENSG00000156052	ENSMUSG00000024639	0.0012	0.2934	0.00408998				ENSMUSG00000027893	ENSG00000168710	0	0.2832	0				ENSG00000205339	ENSMUSG00000066232	0.0026	0.4057	0.00640868				ENSG00000135298	ENSMUSG00000033569	0.0078	0.3497	0.0223048				ENSMUSG00000061518	ENSG00000135940	0.0994	0.3084	0.322309				ENSMUSG00000053617	ENSG00000107957	0.0443	0.7077	0.0625971
ENSG00000082701	ENSMUSG00000022812	0.0045	0.2939	0.0153113				ENSMUSG00000026782	ENSG00000138443	0.0041	0.2871	0.0142807				ENSG00000147853	ENSMUSG00000024782	0.0381	0.4072	0.0935658				ENSG00000011677	ENSMUSG00000031343	0.0196	0.3498	0.056032												ENSMUSG00000026458	ENSG00000143847	0.0365	0.498	0.0732932
ENSG00000198898	ENSMUSG00000015733	0.0078	0.2941	0.0265216				ENSMUSG00000020849	ENSG00000108953	0	0.2889	0				ENSG00000067900	ENSMUSG00000024290	0.015	0.4076	0.0368008				ENSG00000150625	ENSMUSG00000031517	0.0052	0.3507	0.0148275												ENSMUSG00000020640	ENSG00000198399	0.033	0.4453	0.0741073
ENSG00000115091	ENSMUSG00000026341	0.0011	0.2991	0.0036777				ENSMUSG00000020719	ENSG00000108654	0.0036	0.289	0.0124567				ENSG00000198513	ENSMUSG00000021066	0.0165	0.4112	0.0401265				ENSG00000198722	ENSMUSG00000028456	0.0222	0.351	0.0632479												ENSMUSG00000062257	ENSG00000183715	0.0346	0.4475	0.0773184
ENSG00000128463	ENSMUSG00000027131	0.0025	0.2991	0.00835841				ENSMUSG00000040724	ENSG00000177301	0.0027	0.2894	0.00932965				ENSG00000169398	ENSMUSG00000022607	0.0128	0.4129	0.0310002				ENSG00000133818	ENSMUSG00000055723	0	0.3523	0												ENSMUSG00000052572	ENSG00000150672	0.0308	0.393	0.0783715
ENSG00000171475	ENSMUSG00000038013	0.0387	0.2993	0.129302				ENSMUSG00000033578	ENSG00000126950	0.0143	0.2916	0.0490398				ENSG00000136152	ENSMUSG00000034893	0.0202	0.4131	0.0488986				ENSG00000169306	ENSMUSG00000052372	0.0066	0.3532	0.0186863												ENSMUSG00000031626	ENSG00000154556	0.0368	0.4678	0.0786661
ENSG00000104381	ENSMUSG00000025777	0.0384	0.2997	0.128128				ENSMUSG00000020894	ENSG00000220205	0.0038	0.2921	0.0130092				ENSG00000080371	ENSMUSG00000020132	0.0108	0.4142	0.0260744				ENSG00000137942	ENSMUSG00000039735	0.0103	0.3546	0.0290468												ENSMUSG00000029614	ENSG00000089009	0.0595	0.7275	0.0817869
ENSG00000122705	ENSMUSG00000028478	0.0061	0.3012	0.0202523				ENSMUSG00000040952	ENSG00000105372	0.0033	0.2923	0.0112898				ENSG00000137076	ENSMUSG00000028465	0.0063	0.4148	0.015188				ENSG00000204131	ENSMUSG00000079481	0.1067	0.3547	0.300818												ENSMUSG00000050908	ENSG00000166676	0.0618	0.7007	0.0881975
ENSG00000138430	ENSMUSG00000027108	0.0024	0.3022	0.00794176				ENSMUSG00000000088	ENSG00000178741	0.0742	0.2928	0.253415				ENSG00000163344	ENSMUSG00000027952	0.0907	0.4165	0.217767				ENSG00000170515	ENSMUSG00000025364	0.0048	0.356	0.0134831												ENSMUSG00000035863	ENSG00000099864	0.1249	1.3825	0.0903436
ENSG00000168958	ENSMUSG00000026150	0.0242	0.303	0.079868				ENSMUSG00000024639	ENSG00000156052	0.0012	0.2934	0.00408998				ENSG00000213281	ENSMUSG00000027852	0.0024	0.4173	0.00575126				ENSG00000123124	ENSMUSG00000041058	0.045	0.36	0.125												ENSMUSG00000020486	ENSG00000108387	0.0369	0.4058	0.0909315
ENSG00000118473	ENSMUSG00000028524	0.0323	0.304	0.10625				ENSMUSG00000036087	ENSG00000109171	0.0309	0.2934	0.105317				ENSG00000109846	ENSMUSG00000032060	0.0106	0.4183	0.0253407				ENSG00000183723	ENSMUSG00000051578	0.0219	0.3606	0.0607321												ENSMUSG00000029420	ENSG00000060709	0.0722	0.7701	0.0937541
ENSG00000114030	ENSMUSG00000022905	0.0103	0.3045	0.0338259				ENSMUSG00000015733	ENSG00000198898	0.0078	0.2941	0.0265216				ENSG00000028528	ENSMUSG00000032382	0.0249	0.4228	0.0588931				ENSG00000089818	ENSMUSG00000030327	0.0351	0.3618	0.0970149												ENSMUSG00000025964	ENSG00000114948	0.0481	0.4999	0.0962192
ENSG00000182890	ENSMUSG00000091316	0.0329	0.3047	0.107975				ENSMUSG00000048787	ENSG00000188215	0.0104	0.2941	0.0353621				ENSG00000101557	ENSMUSG00000047879	0.0158	0.4229	0.0373611				ENSG00000133961	ENSMUSG00000021224	0.0337	0.3634	0.0927353												ENSMUSG00000062044	ENSG00000142235	0.0507	0.5098	0.0994508
ENSG00000182890	ENSMUSG00000021794	0.0329	0.3047	0.107975				ENSMUSG00000025262	ENSG00000184083	0.0395	0.2958	0.133536				ENSG00000156467	ENSMUSG00000021520	0.068	0.4249	0.160038				ENSG00000077063	ENSMUSG00000000416	0.0782	0.3643	0.214658												ENSMUSG00000058589	ENSG00000185046	0.0421	0.4145	0.101568
ENSG00000005022	ENSMUSG00000016319	0.0081	0.3048	0.0265748				ENSMUSG00000036371	ENSG00000142864	0.0266	0.2964	0.0897436				ENSG00000133812	ENSMUSG00000038371	0.03	0.4257	0.0704722				ENSG00000167371	ENSMUSG00000045114	0.1324	0.3646	0.363138												ENSMUSG00000022577	ENSG00000176956	0.0532	0.5035	0.10566
ENSG00000165637	ENSMUSG00000021771	0.0295	0.3048	0.0967848				ENSMUSG00000027652	ENSG00000170471	0.0123	0.2985	0.041206				ENSG00000122359	ENSMUSG00000021866	0.0339	0.4273	0.0793354				ENSG00000114850	ENSMUSG00000027828	0.0051	0.3672	0.0138889												ENSMUSG00000059974	ENSG00000182667	0.0655	0.6133	0.106799
ENSG00000123416	ENSMUSG00000023004	0	0.3058	0				ENSMUSG00000004980	ENSG00000122566	0.0027	0.2986	0.0090422				ENSG00000100934	ENSMUSG00000020986	0.0048	0.4276	0.0112254				ENSG00000172733	ENSMUSG00000049184	0.0723	0.3682	0.196361												ENSMUSG00000057230	ENSG00000115977	0.0361	0.3276	0.110195
ENSG00000172020	ENSMUSG00000047261	0.1247	0.3059	0.40765				ENSMUSG00000026341	ENSG00000115091	0.0011	0.2991	0.0036777				ENSG00000166974	ENSMUSG00000024277	0.0125	0.4283	0.0291852				ENSG00000111218	ENSMUSG00000030350	0.0067	0.3685	0.0181818												ENSMUSG00000041670	ENSG00000079841	0.0597	0.4994	0.119543
ENSG00000105372	ENSMUSG00000069391	0.0965	0.3072	0.314128				ENSMUSG00000027131	ENSG00000128463	0.0025	0.2991	0.00835841				ENSG00000107679	ENSMUSG00000040268	0.0515	0.4284	0.120215				ENSG00000157680	ENSMUSG00000038665	0.0188	0.3704	0.0507559												ENSMUSG00000037541	ENSG00000162105	0.0774	0.5993	0.129151
ENSG00000174238	ENSMUSG00000017781	0.005	0.3078	0.0162443				ENSMUSG00000038013	ENSG00000171475	0.0387	0.2993	0.129302				ENSG00000165219	ENSMUSG00000026867	0.0102	0.4329	0.023562				ENSG00000120049	ENSMUSG00000025221	0.0146	0.3794	0.0384818												ENSMUSG00000034675	ENSG00000113758	0.0792	0.5821	0.136059
ENSG00000107566	ENSMUSG00000025198	0.0252	0.3081	0.0817916				ENSMUSG00000025777	ENSG00000104381	0.0384	0.2997	0.128128				ENSG00000151929	ENSMUSG00000030847	0.0798	0.4333	0.184168				ENSG00000104177	ENSMUSG00000027201	0.0422	0.3802	0.110994												ENSMUSG00000019917	ENSG00000186522	0.0761	0.5381	0.141424
ENSG00000135940	ENSMUSG00000061518	0.0994	0.3084	0.322309				ENSMUSG00000028478	ENSG00000122705	0.0061	0.3012	0.0202523				ENSG00000123338	ENSMUSG00000022488	0.0255	0.4368	0.0583791				ENSG00000076716	ENSMUSG00000031119	0.0241	0.3846	0.0626625												ENSMUSG00000029711	ENSG00000130427	0.1276	0.6737	0.189402
ENSG00000102144	ENSMUSG00000062070	0.0108	0.3088	0.0349741				ENSMUSG00000026150	ENSG00000168958	0.0242	0.303	0.079868				ENSG00000130725	ENSMUSG00000005575	0	0.4368	0				ENSG00000125249	ENSMUSG00000051615	0.0022	0.3854	0.00570835												ENSMUSG00000068373	ENSG00000110427	0.1466	0.6921	0.211819
ENSG00000116544	ENSMUSG00000042388	0.0164	0.31	0.0529032				ENSMUSG00000028524	ENSG00000118473	0.0323	0.304	0.10625				ENSG00000172164	ENSMUSG00000060429	0.0325	0.4378	0.0742348				ENSG00000163155	ENSMUSG00000053769	0.0934	0.3882	0.240598
ENSG00000112335	ENSMUSG00000019804	0	0.3102	0				ENSMUSG00000031302	ENSG00000196338	0.0045	0.3041	0.0147978				ENSG00000166340	ENSMUSG00000030894	0.0637	0.4385	0.145268				ENSG00000081026	ENSMUSG00000052539	0.0724	0.3884	0.186406
ENSG00000131779	ENSMUSG00000028102	0.0394	0.3106	0.126851				ENSMUSG00000022905	ENSG00000114030	0.0103	0.3045	0.0338259				ENSG00000110514	ENSMUSG00000040687	0.0258	0.4406	0.0585565				ENSG00000139197	ENSMUSG00000005069	0.0316	0.3889	0.0812548
ENSG00000126858	ENSMUSG00000017686	0.0099	0.3107	0.0318635				ENSMUSG00000021794	ENSG00000182890	0.0329	0.3047	0.107975				ENSG00000180228	ENSMUSG00000002731	0.0106	0.4413	0.0240199				ENSG00000128683	ENSMUSG00000070880	0.0126	0.3894	0.0323575
ENSG00000175073	ENSMUSG00000045210	0.0217	0.3113	0.0697077				ENSMUSG00000009207	ENSG00000144320	0.0745	0.3047	0.244503				ENSG00000031698	ENSMUSG00000068739	0.0207	0.4427	0.0467585				ENSG00000147234	ENSMUSG00000042425	0.0659	0.3914	0.16837
ENSG00000010810	ENSMUSG00000019843	0.0026	0.3115	0.00834671				ENSMUSG00000016319	ENSG00000005022	0.0081	0.3048	0.0265748				ENSG00000166501	ENSMUSG00000052889	0.0054	0.4495	0.0120133				ENSG00000153317	ENSMUSG00000022377	0.0188	0.392	0.0479592
ENSG00000160551	ENSMUSG00000017291	0.0028	0.3118	0.00898012				ENSMUSG00000021771	ENSG00000165637	0.0295	0.3048	0.0967848				ENSG00000103316	ENSMUSG00000030905	0.0634	0.4512	0.140514				ENSG00000163288	ENSMUSG00000029212	0.0087	0.3924	0.0221713
ENSG00000124313	ENSMUSG00000041115	0.0047	0.3121	0.0150593				ENSMUSG00000023004	ENSG00000123416	0	0.3058	0				ENSG00000159023	ENSMUSG00000028906	0.045	0.4525	0.0994475				ENSG00000128683	ENSMUSG00000090665	0.0245	0.3926	0.0624045
ENSG00000088833	ENSMUSG00000027455	0.0182	0.3124	0.0582586				ENSMUSG00000047261	ENSG00000172020	0.1247	0.3059	0.40765				ENSG00000119471	ENSMUSG00000028383	0.0697	0.453	0.153863				ENSG00000089091	ENSMUSG00000037259	0.1332	0.3953	0.336959
ENSG00000068366	ENSMUSG00000031278	0.0147	0.3126	0.047025				ENSMUSG00000038174	ENSG00000155744	0.0238	0.3078	0.0773229				ENSG00000166986	ENSMUSG00000040354	0.0587	0.4592	0.127831				ENSG00000108733	ENSMUSG00000018733	0.0646	0.3957	0.163255
ENSG00000144283	ENSMUSG00000026991	0.0172	0.3142	0.0547422				ENSMUSG00000024393	ENSG00000204469	0.0545	0.3079	0.177006				ENSG00000114520	ENSMUSG00000022808	0.0322	0.46	0.07				ENSG00000100568	ENSMUSG00000021124	0.0378	0.3987	0.0948081
ENSG00000116489	ENSMUSG00000070372	0.0177	0.3145	0.0562798				ENSMUSG00000025198	ENSG00000107566	0.0252	0.3081	0.0817916				ENSG00000198171	ENSMUSG00000068290	0.0933	0.4605	0.202606				ENSG00000115355	ENSMUSG00000032740	0.0254	0.3998	0.0635318
ENSG00000176986	ENSMUSG00000039367	0.0397	0.3148	0.126112				ENSMUSG00000061518	ENSG00000135940	0.0994	0.3084	0.322309				ENSG00000176148	ENSMUSG00000027175	0.0822	0.4615	0.178115				ENSG00000138073	ENSMUSG00000045302	0.0646	0.4006	0.161258
ENSG00000110344	ENSMUSG00000059890	0.0153	0.3173	0.0482194				ENSMUSG00000032355	ENSG00000146147	0.1882	0.309	0.609061				ENSG00000082898	ENSMUSG00000020290	0.0091	0.4631	0.0196502				ENSG00000117640	ENSMUSG00000046671	0.0202	0.4009	0.0503866
ENSG00000079332	ENSMUSG00000020088	0.0023	0.3187	0.00721682				ENSMUSG00000042388	ENSG00000116544	0.0164	0.31	0.0529032				ENSG00000083312	ENSMUSG00000009470	0.0016	0.4638	0.00344976				ENSG00000047188	ENSMUSG00000034653	0.0135	0.4024	0.0335487
ENSG00000204052	ENSMUSG00000071073	0.0058	0.3194	0.018159				ENSMUSG00000021719	ENSG00000186479	0.0249	0.3106	0.0801674				ENSG00000135924	ENSMUSG00000026203	0.0687	0.4639	0.148092				ENSG00000068971	ENSMUSG00000024777	0.0054	0.4026	0.0134128
ENSG00000100030	ENSMUSG00000063358	0.0053	0.3202	0.0165522				ENSMUSG00000017686	ENSG00000126858	0.0099	0.3107	0.0318635				ENSG00000187164	ENSMUSG00000041362	0.0455	0.4643	0.097997				ENSG00000111262	ENSMUSG00000047976	0.0069	0.4036	0.0170961
ENSG00000147164	ENSMUSG00000046032	0.0055	0.3204	0.017166				ENSMUSG00000003119	ENSG00000167258	0.0426	0.3111	0.136933				ENSG00000119321	ENSMUSG00000066151	0.123	0.4645	0.264801				ENSG00000104177	ENSMUSG00000049230	0.0598	0.4044	0.147873
ENSG00000185565	ENSMUSG00000061080	0.0699	0.3219	0.217148				ENSMUSG00000019843	ENSG00000010810	0.0026	0.3115	0.00834671				ENSG00000138685	ENSMUSG00000037225	0.0206	0.4669	0.0441208				ENSG00000146826	ENSMUSG00000036948	0.0178	0.405	0.0439506
ENSG00000082458	ENSMUSG00000000881	0.0033	0.3224	0.0102357				ENSMUSG00000017291	ENSG00000160551	0.0028	0.3118	0.00898012				ENSG00000136051	ENSMUSG00000034560	0.0156	0.4679	0.0333405				ENSG00000146826	ENSMUSG00000091964	0.0178	0.405	0.0439506
ENSG00000111052	ENSMUSG00000019906	0.0021	0.3233	0.00649552				ENSMUSG00000041115	ENSG00000124313	0.0047	0.3121	0.0150593				ENSG00000166925	ENSMUSG00000029723	0.0862	0.4702	0.183326				ENSG00000204228	ENSMUSG00000073422	0.0647	0.4059	0.159399
ENSG00000162734	ENSMUSG00000013698	0.0032	0.3234	0.00989487				ENSMUSG00000079508	ENSG00000184831	0.1011	0.3127	0.323313				ENSG00000090013	ENSMUSG00000040466	0.0389	0.472	0.0824153				ENSG00000126016	ENSMUSG00000041688	0.0597	0.4066	0.146827
ENSG00000067141	ENSMUSG00000032340	0.0283	0.3236	0.0874536				ENSMUSG00000041912	ENSG00000182134	0.0465	0.3134	0.148373				ENSG00000125971	ENSMUSG00000047459	0.0136	0.472	0.0288136				ENSG00000166206	ENSMUSG00000033676	0.0329	0.4092	0.0804008
ENSG00000111540	ENSMUSG00000000711	0	0.3237	0				ENSMUSG00000026991	ENSG00000144283	0.0172	0.3142	0.0547422				ENSG00000138674	ENSMUSG00000035325	0.0432	0.4748	0.0909857				ENSG00000143195	ENSMUSG00000040612	0.0438	0.4103	0.106751
ENSG00000187391	ENSMUSG00000040003	0.0285	0.324	0.087963				ENSMUSG00000070372	ENSG00000116489	0.0177	0.3145	0.0562798				ENSG00000175198	ENSMUSG00000041650	0.0574	0.4767	0.120411				ENSG00000063601	ENSMUSG00000015214	0.0335	0.4107	0.0815681
ENSG00000108231	ENSMUSG00000067242	0.0144	0.3247	0.0443486				ENSMUSG00000039367	ENSG00000176986	0.0397	0.3148	0.126112				ENSG00000154229	ENSMUSG00000050965	0.0027	0.4785	0.00564263				ENSG00000151012	ENSMUSG00000027737	0.0572	0.4114	0.139037
ENSG00000158882	ENSMUSG00000005674	0.0108	0.3249	0.033241				ENSMUSG00000038014	ENSG00000048828	0.0157	0.3191	0.0492009				ENSG00000004660	ENSMUSG00000020785	0.0317	0.4835	0.0655636				ENSG00000163686	ENSMUSG00000025277	0.0281	0.4117	0.0682536
ENSG00000136754	ENSMUSG00000058835	0.0089	0.3252	0.0273678				ENSMUSG00000071073	ENSG00000204052	0.0058	0.3194	0.018159				ENSG00000023734	ENSMUSG00000030224	0.0105	0.4861	0.0216005				ENSG00000143575	ENSMUSG00000027944	0.1024	0.4118	0.248664
ENSG00000156482	ENSMUSG00000062582	0	0.3258	0				ENSMUSG00000063358	ENSG00000100030	0.0053	0.3202	0.0165522				ENSG00000117868	ENSMUSG00000021171	0.039	0.487	0.0800821				ENSG00000123360	ENSMUSG00000022489	0.02	0.4128	0.0484496
ENSG00000173915	ENSMUSG00000071528	0.0481	0.3267	0.14723				ENSMUSG00000042605	ENSG00000204842	0.0564	0.3203	0.176085				ENSG00000170248	ENSMUSG00000032504	0.0271	0.4888	0.0554419				ENSG00000176454	ENSMUSG00000027134	0.0346	0.4133	0.0837164
ENSG00000072518	ENSMUSG00000024969	0.0079	0.327	0.024159				ENSMUSG00000028546	ENSG00000162374	0.0104	0.3215	0.0323484				ENSG00000064042	ENSMUSG00000037736	0.0685	0.4899	0.139824				ENSG00000198739	ENSMUSG00000042846	0.011	0.4146	0.0265316
ENSG00000115977	ENSMUSG00000057230	0.0361	0.3276	0.110195				ENSMUSG00000045103	ENSG00000198947	0.0439	0.3215	0.136547				ENSG00000116161	ENSMUSG00000014226	0.0305	0.4899	0.0622576				ENSG00000142676	ENSMUSG00000058064	0.0052	0.4152	0.0125241
ENSG00000006125	ENSMUSG00000035152	0.0005	0.3289	0.00152022				ENSMUSG00000028552	ENSG00000085832	0.0585	0.3215	0.18196				ENSG00000105197	ENSMUSG00000003438	0.0421	0.4904	0.0858483				ENSG00000182220	ENSMUSG00000031007	0.034	0.4176	0.0814176
ENSG00000004059	ENSMUSG00000020440	0	0.3294	0				ENSMUSG00000021794	ENSG00000148672	0.0118	0.3218	0.0366687				ENSG00000167578	ENSMUSG00000053291	0.0042	0.4904	0.00856444				ENSG00000122406	ENSMUSG00000058558	0.0075	0.4179	0.0179469
ENSG00000095139	ENSMUSG00000032096	0.0046	0.33	0.0139394				ENSMUSG00000061080	ENSG00000185565	0.0699	0.3219	0.217148				ENSG00000107020	ENSMUSG00000016495	0.0919	0.4952	0.185582				ENSG00000166862	ENSMUSG00000019146	0.0051	0.4179	0.0122039
ENSG00000101367	ENSMUSG00000027479	0.0164	0.3311	0.0495319				ENSMUSG00000000881	ENSG00000082458	0.0033	0.3224	0.0102357				ENSG00000084774	ENSMUSG00000013629	0.0236	0.4962	0.0475615				ENSG00000137216	ENSMUSG00000036026	0.0082	0.4203	0.0195099
ENSG00000167552	ENSMUSG00000072235	0	0.332	0				ENSMUSG00000029405	ENSG00000138757	0.0074	0.3226	0.0229386				ENSG00000136193	ENSMUSG00000019124	0.0618	0.4963	0.124521				ENSG00000154146	ENSMUSG00000053310	0.0175	0.4213	0.0415381
ENSG00000162188	ENSMUSG00000071658	0	0.3355	0				ENSMUSG00000019906	ENSG00000111052	0.0021	0.3233	0.00649552				ENSG00000131462	ENSMUSG00000035198	0.0047	0.4967	0.00946245				ENSG00000127483	ENSMUSG00000028759	0.0512	0.4217	0.121413
ENSG00000138814	ENSMUSG00000028161	0.0018	0.336	0.00535714				ENSMUSG00000032340	ENSG00000067141	0.0283	0.3236	0.0874536				ENSG00000115252	ENSMUSG00000059173	0.038	0.4975	0.0763819				ENSG00000108588	ENSMUSG00000078622	0.009	0.4225	0.0213018
ENSG00000087258	ENSMUSG00000031748	0.0086	0.3362	0.02558				ENSMUSG00000040003	ENSG00000187391	0.0285	0.324	0.087963				ENSG00000138279	ENSMUSG00000021814	0.0394	0.4984	0.079053				ENSG00000078725	ENSMUSG00000028351	0.0052	0.4229	0.0122961
ENSG00000135940	ENSMUSG00000079941	0.0998	0.3363	0.296759				ENSMUSG00000067242	ENSG00000108231	0.0144	0.3247	0.0443486				ENSG00000135655	ENSMUSG00000020124	0.0111	0.4995	0.0222222				ENSG00000066926	ENSMUSG00000024588	0.063	0.4231	0.148901
ENSG00000091164	ENSMUSG00000024583	0.0064	0.337	0.0189911				ENSMUSG00000058835	ENSG00000136754	0.0089	0.3252	0.0273678				ENSG00000060971	ENSMUSG00000010651	0.0789	0.5	0.1578				ENSG00000158987	ENSMUSG00000037533	0.0425	0.4236	0.100331
ENSG00000164924	ENSMUSG00000022285	0.0019	0.3375	0.00562963				ENSMUSG00000041530	ENSG00000092847	0.0003	0.3254	0.000921942				ENSG00000198677	ENSMUSG00000033991	0.0856	0.5002	0.171132				ENSG00000157005	ENSMUSG00000004366	0.0162	0.4283	0.037824
ENSG00000169891	ENSMUSG00000040855	0.0625	0.3379	0.184966				ENSMUSG00000071528	ENSG00000173915	0.0481	0.3267	0.14723				ENSG00000112640	ENSMUSG00000059409	0.0136	0.5043	0.0269681				ENSG00000101349	ENSMUSG00000039913	0.0291	0.4288	0.0678638
ENSG00000169564	ENSMUSG00000051695	0	0.3383	0				ENSMUSG00000024969	ENSG00000072518	0.0079	0.327	0.024159				ENSG00000141252	ENSMUSG00000017288	0.0158	0.5049	0.0312933				ENSG00000001631	ENSMUSG00000000600	0.0277	0.4293	0.0645236
ENSG00000134444	ENSMUSG00000026319	0.0367	0.3411	0.107593				ENSMUSG00000057230	ENSG00000115977	0.0361	0.3276	0.110195				ENSG00000117448	ENSMUSG00000028692	0.0356	0.5052	0.0704671				ENSG00000154380	ENSMUSG00000022995	0.0542	0.4306	0.125871
ENSG00000143653	ENSMUSG00000038936	0.0721	0.3414	0.211189				ENSMUSG00000039478	ENSG00000155970	0.038	0.3281	0.115818				ENSG00000071967	ENSMUSG00000027015	0.1663	0.5054	0.329046				ENSG00000144895	ENSMUSG00000027810	0.0331	0.4307	0.0768516
ENSG00000069345	ENSMUSG00000031701	0.0023	0.3432	0.00670163				ENSMUSG00000035152	ENSG00000006125	0.0005	0.3289	0.00152022				ENSG00000160007	ENSMUSG00000058230	0.0109	0.5054	0.0215671				ENSG00000059758	ENSMUSG00000020015	0.0063	0.4341	0.0145128
ENSG00000115310	ENSMUSG00000020458	0.1372	0.3439	0.398953				ENSMUSG00000020440	ENSG00000004059	0	0.3294	0				ENSG00000151835	ENSMUSG00000048279	0.0663	0.5055	0.131157				ENSG00000151834	ENSMUSG00000000560	0.0114	0.4344	0.0262431
ENSG00000182934	ENSMUSG00000032042	0.0119	0.3461	0.0343831				ENSMUSG00000025656	ENSG00000131089	0.009	0.3313	0.0271657				ENSG00000112855	ENSMUSG00000019143	0.0912	0.5056	0.18038				ENSG00000121753	ENSMUSG00000028782	0.0175	0.4358	0.040156
ENSG00000108424	ENSMUSG00000001440	0.0039	0.3466	0.0112522				ENSMUSG00000072235	ENSG00000167552	0	0.332	0				ENSG00000137106	ENSMUSG00000035637	0.0764	0.5064	0.150869				ENSG00000166225	ENSMUSG00000020170	0.0216	0.4369	0.0494392
ENSG00000120251	ENSMUSG00000033981	0.0083	0.3467	0.02394				ENSMUSG00000029169	ENSG00000109606	0.0017	0.3342	0.00508677				ENSG00000151552	ENSMUSG00000015806	0.0319	0.51	0.062549				ENSG00000172375	ENSMUSG00000032120	0.0469	0.4369	0.107347
ENSG00000178127	ENSMUSG00000024099	0.0358	0.3468	0.10323				ENSMUSG00000040990	ENSG00000147010	0.0278	0.3349	0.0830099				ENSG00000135046	ENSMUSG00000024659	0.0626	0.5101	0.122721				ENSG00000114942	ENSMUSG00000025967	0.0293	0.44	0.0665909
ENSG00000170624	ENSMUSG00000020354	0.0273	0.347	0.0786744				ENSMUSG00000028790	ENSG00000121774	0.0274	0.3353	0.0817179				ENSG00000073417	ENSMUSG00000025584	0.1218	0.5117	0.23803				ENSG00000106636	ENSMUSG00000002741	0.0354	0.4404	0.0803815
ENSG00000205302	ENSMUSG00000034484	0.0098	0.3472	0.0282258				ENSMUSG00000071658	ENSG00000162188	0	0.3355	0				ENSG00000197386	ENSMUSG00000029104	0.049	0.5122	0.0956658				ENSG00000115808	ENSMUSG00000024077	0.0161	0.4409	0.0365162
ENSG00000159348	ENSMUSG00000026456	0.0428	0.3474	0.123201				ENSMUSG00000036052	ENSG00000137094	0.0038	0.3356	0.011323				ENSG00000211455	ENSMUSG00000001630	0.0111	0.514	0.0215953				ENSG00000113231	ENSMUSG00000021684	0.0205	0.4411	0.0464747
ENSG00000198814	ENSMUSG00000025059	0.0127	0.3477	0.0365257				ENSMUSG00000028161	ENSG00000138814	0.0018	0.336	0.00535714				ENSG00000060971	ENSMUSG00000036138	0.0832	0.5145	0.16171				ENSG00000179091	ENSMUSG00000022551	0.0525	0.4416	0.118886
ENSG00000134308	ENSMUSG00000076432	0.0018	0.3482	0.00516944				ENSMUSG00000021065	ENSG00000033170	0.0163	0.3361	0.0484975				ENSG00000002549	ENSMUSG00000039682	0.0478	0.5163	0.0925818				ENSG00000034693	ENSMUSG00000019809	0.0293	0.4424	0.0662297
ENSG00000059915	ENSMUSG00000037126	0.0407	0.3504	0.116153				ENSMUSG00000031748	ENSG00000087258	0.0086	0.3362	0.02558				ENSG00000148341	ENSMUSG00000026860	0.0149	0.5166	0.0288424				ENSG00000072501	ENSMUSG00000041133	0.0007	0.4427	0.00158121
ENSG00000119711	ENSMUSG00000021238	0.0246	0.3506	0.0701654				ENSMUSG00000022285	ENSG00000164924	0.0019	0.3375	0.00562963				ENSG00000120053	ENSMUSG00000025190	0.0468	0.5173	0.0904697				ENSG00000125037	ENSMUSG00000030286	0.0018	0.4433	0.00406046
ENSG00000147224	ENSMUSG00000031432	0	0.3507	0				ENSMUSG00000026470	ENSG00000135823	0.0305	0.3376	0.0903436				ENSG00000125166	ENSMUSG00000031672	0.025	0.5176	0.0482998				ENSG00000173517	ENSMUSG00000074305	0.0735	0.4451	0.165131
ENSG00000173611	ENSMUSG00000035236	0.0145	0.3509	0.0413223				ENSMUSG00000051695	ENSG00000169564	0	0.3383	0				ENSG00000164904	ENSMUSG00000053644	0.064	0.5181	0.123528				ENSG00000145864	ENSMUSG00000007653	0.001	0.4457	0.00224366
ENSG00000124486	ENSMUSG00000031010	0.0072	0.3512	0.0205011				ENSMUSG00000038936	ENSG00000143653	0.0721	0.3414	0.211189				ENSG00000133742	ENSMUSG00000027556	0.134	0.5197	0.257841				ENSG00000184983	ENSMUSG00000022450	0.0855	0.4458	0.19179
ENSG00000134001	ENSMUSG00000021116	0.0042	0.3513	0.0119556				ENSMUSG00000031701	ENSG00000069345	0.0023	0.3432	0.00670163				ENSG00000109654	ENSMUSG00000027993	0.0041	0.5205	0.00787704				ENSG00000006715	ENSMUSG00000041236	0.0122	0.4462	0.027342
ENSG00000130227	ENSMUSG00000022100	0.0027	0.3518	0.00767482				ENSMUSG00000020458	ENSG00000115310	0.1372	0.3439	0.398953				ENSG00000164961	ENSMUSG00000022350	0.0204	0.5205	0.0391931				ENSG00000152092	ENSMUSG00000026587	0.0096	0.4484	0.0214095
ENSG00000117758	ENSMUSG00000028879	0.0359	0.3522	0.101931				ENSMUSG00000063142	ENSG00000156113	0.0074	0.344	0.0215116				ENSG00000067992	ENSMUSG00000035232	0.0151	0.5213	0.028966				ENSG00000159784	ENSMUSG00000029861	0.0192	0.4492	0.0427427
ENSG00000162368	ENSMUSG00000028719	0.0422	0.3535	0.119378				ENSMUSG00000027184	ENSG00000135387	0.014	0.3442	0.040674				ENSG00000042493	ENSMUSG00000056737	0.0341	0.522	0.0653257				ENSG00000144290	ENSMUSG00000026904	0.0105	0.4503	0.0233178
ENSG00000167535	ENSMUSG00000003352	0.0036	0.3539	0.0101724				ENSMUSG00000026755	ENSG00000136950	0.0152	0.3442	0.0441604				ENSG00000139641	ENSMUSG00000025366	0.063	0.5224	0.120597				ENSG00000116560	ENSMUSG00000028820	0.0364	0.4532	0.0803177
ENSG00000144036	ENSMUSG00000033769	0.0046	0.3541	0.0129907				ENSMUSG00000031311	ENSG00000147140	0.004	0.345	0.0115942				ENSG00000108465	ENSMUSG00000018669	0.0586	0.5235	0.111939				ENSG00000198838	ENSMUSG00000057378	0.021	0.4535	0.0463065
ENSG00000091428	ENSMUSG00000049044	0.0134	0.3547	0.0377784				ENSMUSG00000032328	ENSG00000112697	0.0604	0.345	0.175072				ENSG00000185722	ENSMUSG00000020790	0.0268	0.5246	0.0510865				ENSG00000143702	ENSMUSG00000057335	0.0508	0.4536	0.111993
ENSG00000044574	ENSMUSG00000026864	0.007	0.3553	0.0197017				ENSMUSG00000020152	ENSG00000138071	0	0.3455	0				ENSG00000106125	ENSMUSG00000038022	0.1503	0.5249	0.28634				ENSG00000113805	ENSMUSG00000030075	0.0429	0.4542	0.0944518
ENSG00000144834	ENSMUSG00000022658	0.0044	0.3563	0.0123491				ENSMUSG00000027287	ENSG00000092531	0.0654	0.3459	0.189072				ENSG00000151475	ENSMUSG00000069041	0.0592	0.5261	0.112526				ENSG00000155974	ENSMUSG00000034813	0.0188	0.4543	0.0413823
ENSG00000157500	ENSMUSG00000040760	0.0078	0.3564	0.0218855				ENSMUSG00000032042	ENSG00000182934	0.0119	0.3461	0.0343831				ENSG00000091483	ENSMUSG00000026526	0.0361	0.5267	0.06854				ENSG00000104723	ENSMUSG00000039530	0.0122	0.4546	0.0268368
ENSG00000173726	ENSMUSG00000058779	0.0032	0.3571	0.00896108				ENSMUSG00000018736	ENSG00000166579	0.0192	0.3462	0.0554593				ENSG00000197043	ENSMUSG00000018340	0.0283	0.5271	0.05369				ENSG00000103404	ENSMUSG00000063317	0.0436	0.4557	0.095677
ENSG00000095637	ENSMUSG00000025006	0.0595	0.3583	0.166062				ENSMUSG00000001440	ENSG00000108424	0.0039	0.3466	0.0112522				ENSG00000057608	ENSMUSG00000021218	0.0178	0.529	0.0336484				ENSG00000136805	ENSMUSG00000045589	0.0409	0.4557	0.089752
ENSG00000117450	ENSMUSG00000048164	0.0478	0.3585	0.133333				ENSMUSG00000033981	ENSG00000120251	0.0083	0.3467	0.02394				ENSG00000130340	ENSMUSG00000002365	0.0452	0.5294	0.0853797				ENSG00000136040	ENSMUSG00000074785	0.0494	0.456	0.108333
ENSG00000215301	ENSMUSG00000000787	0.0069	0.3605	0.0191401				ENSMUSG00000024099	ENSG00000178127	0.0358	0.3468	0.10323				ENSG00000159176	ENSMUSG00000026421	0.0024	0.5303	0.00452574				ENSG00000077157	ENSMUSG00000073557	0.0628	0.4561	0.137689
ENSG00000025772	ENSMUSG00000018322	0.0585	0.3608	0.16214				ENSMUSG00000025059	ENSG00000198814	0.0127	0.3477	0.0365257				ENSG00000184752	ENSMUSG00000020022	0.0632	0.5313	0.118954				ENSG00000173208	ENSMUSG00000055782	0.0302	0.4578	0.0659677
ENSG00000023228	ENSMUSG00000025968	0.028	0.3609	0.0775838				ENSMUSG00000031065	ENSG00000102225	0.0124	0.3478	0.0356527				ENSG00000127481	ENSMUSG00000066036	0.0151	0.5326	0.0283515				ENSG00000170049	ENSMUSG00000018470	0.0345	0.4611	0.0748211
ENSG00000164587	ENSMUSG00000024608	0	0.3621	0				ENSMUSG00000076432	ENSG00000134308	0.0018	0.3482	0.00516944				ENSG00000009335	ENSMUSG00000039000	0.0333	0.5335	0.062418				ENSG00000155506	ENSMUSG00000037331	0.0524	0.4615	0.113543
ENSG00000132305	ENSMUSG00000052337	0.059	0.3624	0.162804				ENSMUSG00000033569	ENSG00000135298	0.0078	0.3497	0.0223048				ENSG00000100412	ENSMUSG00000022477	0.0158	0.5347	0.0295493				ENSG00000151532	ENSMUSG00000024983	0.0235	0.4617	0.0508989
ENSG00000131236	ENSMUSG00000028656	0.0285	0.3627	0.0785773				ENSMUSG00000031343	ENSG00000011677	0.0196	0.3498	0.056032				ENSG00000004478	ENSMUSG00000030357	0.0525	0.5355	0.0980392				ENSG00000134909	ENSMUSG00000041444	0.0672	0.4619	0.145486
ENSG00000128245	ENSMUSG00000018965	0.0036	0.3628	0.00992282				ENSMUSG00000037126	ENSG00000059915	0.0407	0.3504	0.116153				ENSG00000134516	ENSMUSG00000020143	0.0235	0.5363	0.0438188				ENSG00000075413	ENSMUSG00000007411	0.0149	0.462	0.0322511
ENSG00000114867	ENSMUSG00000045983	0.0438	0.3633	0.120562				ENSMUSG00000031432	ENSG00000147224	0	0.3507	0				ENSG00000198130	ENSMUSG00000041426	0.0968	0.5368	0.180328				ENSG00000170348	ENSMUSG00000021248	0.0335	0.4625	0.0724324
ENSG00000119689	ENSMUSG00000004789	0.0411	0.3643	0.112819				ENSMUSG00000031517	ENSG00000150625	0.0052	0.3507	0.0148275				ENSG00000197872	ENSMUSG00000020589	0.0014	0.5381	0.00260175				ENSG00000143183	ENSMUSG00000052428	0	0.4633	0
ENSG00000174373	ENSMUSG00000021027	0.0252	0.3646	0.0691168				ENSMUSG00000035236	ENSG00000173611	0.0145	0.3509	0.0413223				ENSG00000009844	ENSMUSG00000019868	0.0393	0.5383	0.0730076				ENSG00000145247	ENSMUSG00000029153	0.0783	0.4644	0.168605
ENSG00000115866	ENSMUSG00000026356	0.0183	0.3647	0.0501782				ENSMUSG00000028456	ENSG00000198722	0.0222	0.351	0.0632479				ENSG00000136167	ENSMUSG00000021998	0.0152	0.5394	0.0281795				ENSG00000177034	ENSMUSG00000021704	0.0536	0.4673	0.114701
ENSG00000100591	ENSMUSG00000021037	0.0249	0.3649	0.0682379				ENSMUSG00000028879	ENSG00000117758	0.0359	0.3522	0.101931				ENSG00000187231	ENSMUSG00000042272	0.0086	0.5394	0.0159436				ENSG00000169221	ENSMUSG00000042492	0.0517	0.4677	0.110541
ENSG00000088538	ENSMUSG00000039716	0.0091	0.3653	0.024911				ENSMUSG00000055723	ENSG00000133818	0	0.3523	0				ENSG00000124198	ENSMUSG00000074582	0.0219	0.5399	0.0405631				ENSG00000156026	ENSMUSG00000009647	0.0196	0.4678	0.0418982
ENSG00000169862	ENSMUSG00000022240	0.0135	0.3657	0.0369155				ENSMUSG00000052372	ENSG00000169306	0.0066	0.3532	0.0186863				ENSG00000140575	ENSMUSG00000030536	0.0213	0.5419	0.0393061				ENSG00000147123	ENSMUSG00000031059	0.1345	0.4682	0.28727
ENSG00000117450	ENSMUSG00000028691	0.0285	0.3669	0.0776778				ENSMUSG00000003352	ENSG00000167535	0.0036	0.3539	0.0101724				ENSG00000006747	ENSMUSG00000002565	0.0465	0.5432	0.0856038				ENSG00000198216	ENSMUSG00000004110	0.0156	0.4688	0.0332765
ENSG00000197971	ENSMUSG00000041607	0.0656	0.367	0.178747				ENSMUSG00000033769	ENSG00000144036	0.0046	0.3541	0.0129907				ENSG00000150054	ENSMUSG00000057440	0.0356	0.5448	0.0653451				ENSG00000107560	ENSMUSG00000040022	0.0413	0.4692	0.0880222
ENSG00000115944	ENSMUSG00000024248	0.0849	0.368	0.230707				ENSMUSG00000039735	ENSG00000137942	0.0103	0.3546	0.0290468				ENSG00000166947	ENSMUSG00000023216	0.1688	0.5456	0.309384				ENSG00000145730	ENSMUSG00000026335	0.0475	0.4706	0.100935
ENSG00000147162	ENSMUSG00000034160	0.0018	0.3689	0.00487937				ENSMUSG00000049044	ENSG00000091428	0.0134	0.3547	0.0377784				ENSG00000125447	ENSMUSG00000020740	0.0668	0.546	0.122344				ENSG00000140937	ENSMUSG00000031673	0.0126	0.4711	0.0267459
ENSG00000175216	ENSMUSG00000040549	0.0248	0.3696	0.0670996				ENSMUSG00000026864	ENSG00000044574	0.007	0.3553	0.0197017				ENSG00000116266	ENSMUSG00000027882	0.0413	0.5461	0.0756272				ENSG00000110076	ENSMUSG00000033768	0.0078	0.4736	0.0164696
ENSG00000205544	ENSMUSG00000070394	0.0628	0.3697	0.169867				ENSMUSG00000025364	ENSG00000170515	0.0048	0.356	0.0134831				ENSG00000100003	ENSMUSG00000003585	0.033	0.5466	0.0603732				ENSG00000144369	ENSMUSG00000048388	0.0587	0.4741	0.123814
ENSG00000100462	ENSMUSG00000023110	0.0095	0.3702	0.0256618				ENSMUSG00000022658	ENSG00000144834	0.0044	0.3563	0.0123491				ENSG00000124207	ENSMUSG00000002718	0.0048	0.5475	0.00876712				ENSG00000147123	ENSMUSG00000061633	0.2271	0.4749	0.478206
ENSG00000168807	ENSMUSG00000041308	0.0171	0.3711	0.0460792				ENSMUSG00000058779	ENSG00000173726	0.0032	0.3571	0.00896108				ENSG00000037042	ENSMUSG00000045007	0.0104	0.5504	0.0188953				ENSG00000066044	ENSMUSG00000040028	0.0069	0.475	0.0145263
ENSG00000111737	ENSMUSG00000029518	0.0004	0.3712	0.00107759				ENSMUSG00000025006	ENSG00000095637	0.0595	0.3583	0.166062				ENSG00000124942	ENSMUSG00000069833	0.0905	0.5535	0.163505				ENSG00000151726	ENSMUSG00000018796	0.0807	0.4753	0.169788
ENSG00000204463	ENSMUSG00000024392	0.0294	0.3717	0.079096				ENSMUSG00000041058	ENSG00000123124	0.045	0.36	0.125				ENSG00000129515	ENSMUSG00000005656	0.0022	0.5535	0.00397471				ENSG00000164751	ENSMUSG00000040374	0.0652	0.4758	0.137032
ENSG00000198648	ENSMUSG00000027030	0.021	0.3719	0.0564668				ENSMUSG00000051578	ENSG00000183723	0.0219	0.3606	0.0607321				ENSG00000171202	ENSMUSG00000030615	0.1702	0.5536	0.307442				ENSG00000134369	ENSMUSG00000009418	0.0173	0.479	0.0361169
ENSG00000166887	ENSMUSG00000027291	0.0144	0.372	0.0387097				ENSMUSG00000025968	ENSG00000023228	0.028	0.3609	0.0775838				ENSG00000204351	ENSMUSG00000040356	0.0339	0.5542	0.0611693				ENSG00000163462	ENSMUSG00000042766	0.0102	0.4807	0.0212191
ENSG00000035403	ENSMUSG00000021823	0.0031	0.3723	0.00832662				ENSMUSG00000030327	ENSG00000089818	0.0351	0.3618	0.0970149				ENSG00000132842	ENSMUSG00000021686	0.0717	0.5554	0.129096				ENSG00000153933	ENSMUSG00000000276	0.0456	0.4811	0.0947828
ENSG00000132142	ENSMUSG00000020532	0.0113	0.3727	0.0303193				ENSMUSG00000024608	ENSG00000164587	0	0.3621	0				ENSG00000149541	ENSMUSG00000071649	0.0209	0.5588	0.0374016				ENSG00000065665	ENSMUSG00000025816	0.0005	0.4829	0.00103541
ENSG00000166128	ENSMUSG00000036943	0.0064	0.3746	0.0170849				ENSMUSG00000052337	ENSG00000132305	0.059	0.3624	0.162804				ENSG00000161204	ENSMUSG00000003234	0.0171	0.5595	0.030563				ENSG00000111110	ENSMUSG00000034613	0.0158	0.4837	0.0326649
ENSG00000005249	ENSMUSG00000002997	0.0156	0.3756	0.0415335				ENSMUSG00000028656	ENSG00000131236	0.0285	0.3627	0.0785773				ENSG00000130638	ENSMUSG00000016541	0.0988	0.5604	0.176303				ENSG00000075151	ENSMUSG00000028760	0.0712	0.4842	0.147047
ENSG00000153707	ENSMUSG00000028399	0.0062	0.3758	0.0164981				ENSMUSG00000018965	ENSG00000128245	0.0036	0.3628	0.00992282				ENSG00000065613	ENSMUSG00000025060	0.0932	0.564	0.165248				ENSG00000100226	ENSMUSG00000042535	0.0127	0.4842	0.0262288
ENSG00000112290	ENSMUSG00000019831	0.0081	0.3758	0.021554				ENSMUSG00000045983	ENSG00000114867	0.0438	0.3633	0.120562				ENSG00000068120	ENSMUSG00000001755	0.0692	0.5641	0.122673				ENSG00000166924	ENSMUSG00000045348	0.0396	0.4852	0.0816158
ENSG00000078668	ENSMUSG00000008892	0.0082	0.376	0.0218085				ENSMUSG00000021224	ENSG00000133961	0.0337	0.3634	0.0927353				ENSG00000108861	ENSMUSG00000003518	0.0323	0.5669	0.0569765				ENSG00000141376	ENSMUSG00000059439	0.0151	0.4863	0.0310508
ENSG00000136631	ENSMUSG00000015747	0.0145	0.3764	0.0385228				ENSMUSG00000004789	ENSG00000119689	0.0411	0.3643	0.112819				ENSG00000164830	ENSMUSG00000022307	0.0919	0.5683	0.16171				ENSG00000117523	ENSMUSG00000040225	0.0702	0.4869	0.144177
ENSG00000129245	ENSMUSG00000018765	0.0077	0.3774	0.0204028				ENSMUSG00000000416	ENSG00000077063	0.0782	0.3643	0.214658				ENSG00000115685	ENSMUSG00000026275	0.0272	0.5688	0.04782				ENSG00000101365	ENSMUSG00000027406	0.0311	0.4874	0.063808
ENSG00000165795	ENSMUSG00000004558	0.0227	0.3811	0.0595644				ENSMUSG00000045114	ENSG00000167371	0.1324	0.3646	0.363138				ENSG00000124181	ENSMUSG00000016933	0.019	0.5689	0.0333978				ENSG00000172915	ENSMUSG00000027799	0.0125	0.4914	0.0254375
ENSG00000099942	ENSMUSG00000006134	0.0159	0.3832	0.0414927				ENSMUSG00000039716	ENSG00000088538	0.0091	0.3653	0.024911				ENSG00000217930	ENSMUSG00000014301	0.0228	0.57	0.04				ENSG00000071054	ENSMUSG00000026074	0.0072	0.4916	0.0146461
ENSG00000060237	ENSMUSG00000045962	0.0761	0.3833	0.198539				ENSMUSG00000022240	ENSG00000169862	0.0135	0.3657	0.0369155				ENSG00000041982	ENSMUSG00000028364	0.0676	0.5717	0.118244				ENSG00000152402	ENSMUSG00000041624	0.0501	0.4942	0.101376
ENSG00000211456	ENSMUSG00000025240	0.0234	0.3834	0.0610329				ENSMUSG00000020716	ENSG00000196712	0.008	0.3658	0.0218699				ENSG00000149313	ENSMUSG00000025894	0.0417	0.5718	0.0729276				ENSG00000132563	ENSMUSG00000038555	0.0331	0.4986	0.0663859
ENSG00000136238	ENSMUSG00000001847	0	0.3842	0				ENSMUSG00000028691	ENSG00000117450	0.0285	0.3669	0.0776778				ENSG00000182199	ENSMUSG00000025403	0.0316	0.5725	0.0551965				ENSG00000040933	ENSMUSG00000026113	0.0159	0.4998	0.0318127
ENSG00000132535	ENSMUSG00000020886	0.0105	0.3844	0.0273153				ENSMUSG00000041607	ENSG00000197971	0.0656	0.367	0.178747				ENSG00000160752	ENSMUSG00000059743	0.0855	0.5731	0.149189				ENSG00000100997	ENSMUSG00000032046	0.0572	0.5006	0.114263
ENSG00000119787	ENSMUSG00000059811	0.0113	0.3845	0.0293888				ENSMUSG00000027828	ENSG00000114850	0.0051	0.3672	0.0138889				ENSG00000151632	ENSMUSG00000021214	0.1846	0.5738	0.321715				ENSG00000116641	ENSMUSG00000028556	0.0084	0.5016	0.0167464
ENSG00000152578	ENSMUSG00000025892	0.0015	0.3846	0.00390016				ENSMUSG00000024248	ENSG00000115944	0.0849	0.368	0.230707				ENSG00000182718	ENSMUSG00000032231	0.0121	0.5743	0.0210691				ENSG00000129219	ENSMUSG00000020828	0.0526	0.502	0.104781
ENSG00000067191	ENSMUSG00000020882	0.0083	0.385	0.0215584				ENSMUSG00000049184	ENSG00000172733	0.0723	0.3682	0.196361				ENSG00000103043	ENSMUSG00000010936	0.0265	0.5747	0.046111				ENSG00000011021	ENSMUSG00000029016	0.0146	0.5021	0.0290779
ENSG00000006451	ENSMUSG00000008859	0.0022	0.3853	0.00570984				ENSMUSG00000030350	ENSG00000111218	0.0067	0.3685	0.0181818				ENSG00000189058	ENSMUSG00000022548	0.1916	0.5761	0.332581				ENSG00000168546	ENSMUSG00000022103	0.0279	0.5026	0.0555113
ENSG00000128872	ENSMUSG00000032186	0.0264	0.3853	0.068518				ENSMUSG00000034160	ENSG00000147162	0.0018	0.3689	0.00487937				ENSG00000133943	ENSMUSG00000021185	0.1624	0.5769	0.281505				ENSG00000106803	ENSMUSG00000092116	0.0152	0.5028	0.0302307
ENSG00000149357	ENSMUSG00000030842	0.0028	0.3854	0.00726518				ENSMUSG00000040549	ENSG00000175216	0.0248	0.3696	0.0670996				ENSG00000164434	ENSMUSG00000019874	0.0754	0.5773	0.130608				ENSG00000131771	ENSMUSG00000061718	0.0664	0.5038	0.131798
ENSG00000120265	ENSMUSG00000019795	0.0209	0.3856	0.0542012				ENSMUSG00000046434	ENSG00000139675	0.0144	0.3699	0.0389294				ENSG00000184277	ENSMUSG00000078681	0.0789	0.5773	0.136671				ENSG00000101098	ENSMUSG00000035226	0.0032	0.5045	0.00634291
ENSG00000158864	ENSMUSG00000013593	0.0413	0.3856	0.107106				ENSMUSG00000038665	ENSG00000157680	0.0188	0.3704	0.0507559				ENSG00000158710	ENSMUSG00000026547	0.0156	0.5787	0.026957				ENSG00000130779	ENSMUSG00000049550	0.0538	0.5045	0.10664
ENSG00000135250	ENSMUSG00000062604	0.0393	0.3859	0.10184				ENSMUSG00000029518	ENSG00000111737	0.0004	0.3712	0.00107759				ENSG00000137992	ENSMUSG00000000340	0.0654	0.5801	0.112739				ENSG00000151498	ENSMUSG00000031969	0.0554	0.5049	0.109725
ENSG00000167004	ENSMUSG00000027248	0.0363	0.3862	0.0939927				ENSMUSG00000027291	ENSG00000166887	0.0144	0.372	0.0387097				ENSG00000196305	ENSMUSG00000037851	0.0493	0.5806	0.0849122				ENSG00000181418	ENSMUSG00000059213	0.1404	0.5051	0.277965
ENSG00000138029	ENSMUSG00000059447	0.0464	0.3881	0.119557				ENSMUSG00000036943	ENSG00000166128	0.0064	0.3746	0.0170849				ENSG00000115839	ENSMUSG00000036104	0.036	0.5807	0.0619941				ENSG00000213593	ENSMUSG00000050043	0.0362	0.5052	0.0716548
ENSG00000108100	ENSMUSG00000024286	0.0094	0.3884	0.0242019				ENSMUSG00000002997	ENSG00000005249	0.0156	0.3756	0.0415335				ENSG00000083720	ENSMUSG00000022186	0.0404	0.5812	0.0695114				ENSG00000132718	ENSMUSG00000068923	0.0212	0.5057	0.0419221
ENSG00000044115	ENSMUSG00000037815	0.0031	0.3889	0.0079712				ENSMUSG00000028399	ENSG00000153707	0.0062	0.3758	0.0164981				ENSG00000147526	ENSMUSG00000065954	0.1486	0.5821	0.255283				ENSG00000148219	ENSMUSG00000028373	0.0121	0.5057	0.0239272
ENSG00000196465	ENSMUSG00000039824	0.0403	0.3892	0.103546				ENSMUSG00000019831	ENSG00000112290	0.0081	0.3758	0.021554				ENSG00000076201	ENSMUSG00000036057	0.0438	0.5844	0.0749487				ENSG00000072778	ENSMUSG00000018574	0.0917	0.5059	0.181261
ENSG00000100220	ENSMUSG00000001783	0.0028	0.3895	0.0071887				ENSMUSG00000008892	ENSG00000078668	0.0082	0.376	0.0218085				ENSG00000100884	ENSMUSG00000022212	0.0097	0.5853	0.0165727				ENSG00000110881	ENSMUSG00000023017	0.0083	0.5065	0.016387
ENSG00000158195	ENSMUSG00000028868	0.0454	0.3902	0.116351				ENSMUSG00000015747	ENSG00000136631	0.0145	0.3764	0.0385228				ENSG00000077279	ENSMUSG00000031285	0.0025	0.5857	0.0042684				ENSG00000185008	ENSMUSG00000052516	0.0207	0.5067	0.0408526
ENSG00000155189	ENSMUSG00000031467	0.1094	0.3902	0.280369				ENSMUSG00000033940	ENSG00000254999	0.0111	0.3769	0.0294508				ENSG00000134121	ENSMUSG00000030077	0.0814	0.5857	0.138979				ENSG00000162951	ENSMUSG00000060780	0.0138	0.5088	0.0271226
ENSG00000116459	ENSMUSG00000000563	0.1043	0.3906	0.267025				ENSMUSG00000018765	ENSG00000129245	0.0077	0.3774	0.0204028				ENSG00000101400	ENSMUSG00000027488	0.038	0.5859	0.0648575				ENSG00000072134	ENSMUSG00000001036	0.0586	0.5089	0.11515
ENSG00000089006	ENSMUSG00000027423	0.0081	0.3916	0.0206844				ENSMUSG00000025221	ENSG00000120049	0.0146	0.3794	0.0384818				ENSG00000101997	ENSMUSG00000031143	0.0641	0.5878	0.109051				ENSG00000157445	ENSMUSG00000021991	0.0093	0.5089	0.0182747
ENSG00000127824	ENSMUSG00000026202	0	0.3919	0				ENSMUSG00000027201	ENSG00000104177	0.0422	0.3802	0.110994				ENSG00000138182	ENSMUSG00000024795	0.1617	0.5879	0.275047				ENSG00000164588	ENSMUSG00000021730	0.0183	0.5097	0.0359035
ENSG00000065609	ENSMUSG00000033419	0.0399	0.3921	0.10176				ENSMUSG00000025240	ENSG00000211456	0.0234	0.3834	0.0610329				ENSG00000138095	ENSMUSG00000024120	0.156	0.5881	0.265261				ENSG00000006116	ENSMUSG00000066189	0.0057	0.5112	0.0111502
ENSG00000062485	ENSMUSG00000046934	0.0526	0.3928	0.13391				ENSMUSG00000001847	ENSG00000136238	0	0.3842	0				ENSG00000158186	ENSMUSG00000032470	0.0157	0.5888	0.0266644				ENSG00000198822	ENSMUSG00000003974	0.0152	0.5129	0.0296354
ENSG00000150672	ENSMUSG00000052572	0.0308	0.393	0.0783715				ENSMUSG00000020886	ENSG00000132535	0.0105	0.3844	0.0273153				ENSG00000148468	ENSMUSG00000050530	0.0397	0.589	0.0674024				ENSG00000011566	ENSMUSG00000024242	0.0198	0.5131	0.038589
ENSG00000064651	ENSMUSG00000024597	0.0284	0.3933	0.0722095				ENSMUSG00000025892	ENSG00000152578	0.0015	0.3846	0.00390016				ENSG00000154027	ENSMUSG00000039058	0.0445	0.5896	0.0754749				ENSG00000169851	ENSMUSG00000029108	0.0183	0.5132	0.0356586
ENSG00000079819	ENSMUSG00000019978	0.0932	0.3933	0.236969				ENSMUSG00000031119	ENSG00000076716	0.0241	0.3846	0.0626625				ENSG00000105875	ENSMUSG00000058486	0.0387	0.5904	0.0655488				ENSG00000135525	ENSMUSG00000019996	0.1154	0.5141	0.22447
ENSG00000213619	ENSMUSG00000005510	0.0726	0.3937	0.184404				ENSMUSG00000020882	ENSG00000067191	0.0083	0.385	0.0215584				ENSG00000171246	ENSMUSG00000025582	0.0162	0.5904	0.027439				ENSG00000196090	ENSMUSG00000053141	0.0067	0.5148	0.0130148
ENSG00000008056	ENSMUSG00000037217	0.022	0.3939	0.0558517				ENSMUSG00000008859	ENSG00000006451	0.0022	0.3853	0.00570984				ENSG00000090861	ENSMUSG00000031960	0.0222	0.5914	0.037538				ENSG00000109016	ENSMUSG00000042569	0.1285	0.5157	0.249176
ENSG00000165283	ENSMUSG00000028455	0.0282	0.3944	0.071501				ENSMUSG00000032186	ENSG00000128872	0.0264	0.3853	0.068518				ENSG00000204590	ENSMUSG00000024429	0.0221	0.5949	0.0371491				ENSG00000080854	ENSMUSG00000034275	0.0189	0.5163	0.0366066
ENSG00000014641	ENSMUSG00000020321	0.0188	0.3945	0.0476553				ENSMUSG00000051615	ENSG00000125249	0.0022	0.3854	0.00570835				ENSG00000187134	ENSMUSG00000021214	0.1729	0.5957	0.290247				ENSG00000155849	ENSMUSG00000041112	0.0019	0.5164	0.00367932
ENSG00000164209	ENSMUSG00000024259	0.0572	0.3956	0.14459				ENSMUSG00000030842	ENSG00000149357	0.0028	0.3854	0.00726518				ENSG00000157483	ENSMUSG00000032220	0.0194	0.5965	0.0325231				ENSG00000114646	ENSMUSG00000032482	0.0705	0.517	0.136364
ENSG00000022355	ENSMUSG00000010803	0.0061	0.3962	0.0153963				ENSMUSG00000013593	ENSG00000158864	0.0413	0.3856	0.107106				ENSG00000002746	ENSMUSG00000021301	0.0629	0.5967	0.105413				ENSG00000106803	ENSMUSG00000067657	0.0315	0.5188	0.060717
ENSG00000114302	ENSMUSG00000032601	0.0903	0.3968	0.227571				ENSMUSG00000062604	ENSG00000135250	0.0393	0.3859	0.10184				ENSG00000142657	ENSMUSG00000028961	0.0313	0.5972	0.0524113				ENSG00000033867	ENSMUSG00000021733	0.0318	0.5198	0.0611774
ENSG00000070367	ENSMUSG00000061244	0.0076	0.3972	0.0191339				ENSMUSG00000059447	ENSG00000138029	0.0464	0.3881	0.119557				ENSG00000075142	ENSMUSG00000003161	0.0196	0.5977	0.0327924				ENSG00000168539	ENSMUSG00000032773	0.0048	0.5228	0.00918133
ENSG00000033122	ENSMUSG00000028176	0.022	0.3974	0.0553598				ENSMUSG00000053769	ENSG00000163155	0.0934	0.3882	0.240598				ENSG00000170584	ENSMUSG00000020328	0.0028	0.5989	0.00467524				ENSG00000177600	ENSMUSG00000091018	0.0088	0.5233	0.0168164
ENSG00000117592	ENSMUSG00000026701	0.0671	0.3975	0.168805				ENSMUSG00000024286	ENSG00000108100	0.0094	0.3884	0.0242019				ENSG00000147471	ENSMUSG00000031485	0.0775	0.6006	0.129038				ENSG00000106803	ENSMUSG00000053317	0.005	0.5236	0.00954927
ENSG00000115484	ENSMUSG00000007739	0.0158	0.3979	0.0397085				ENSMUSG00000052539	ENSG00000081026	0.0724	0.3884	0.186406				ENSG00000181789	ENSMUSG00000030058	0.0126	0.6014	0.0209511				ENSG00000138623	ENSMUSG00000038264	0.0528	0.5243	0.100706
ENSG00000187118	ENSMUSG00000039163	0.0515	0.398	0.129397				ENSMUSG00000037815	ENSG00000044115	0.0031	0.3889	0.0079712				ENSG00000134202	ENSMUSG00000004032	0.0661	0.6021	0.109782				ENSG00000142655	ENSMUSG00000028975	0.0338	0.5244	0.0644546
ENSG00000122218	ENSMUSG00000026553	0.0074	0.3982	0.0185836				ENSMUSG00000005069	ENSG00000139197	0.0316	0.3889	0.0812548				ENSG00000112304	ENSMUSG00000006717	0.0991	0.6022	0.164563				ENSG00000111726	ENSMUSG00000030282	0.0322	0.5266	0.061147
ENSG00000077380	ENSMUSG00000027012	0.0099	0.3989	0.0248183				ENSMUSG00000039824	ENSG00000196465	0.0403	0.3892	0.103546				ENSG00000111731	ENSMUSG00000030279	0.0187	0.6047	0.0309244				ENSG00000176204	ENSMUSG00000052581	0.0228	0.5273	0.0432391
ENSG00000152413	ENSMUSG00000007617	0.0111	0.3996	0.0277778				ENSMUSG00000070880	ENSG00000128683	0.0126	0.3894	0.0323575				ENSG00000164111	ENSMUSG00000027712	0.0374	0.6054	0.0617773				ENSG00000110917	ENSMUSG00000048578	0.0453	0.5295	0.0855524
ENSG00000135720	ENSMUSG00000035770	0.0146	0.3996	0.0365365				ENSMUSG00000001783	ENSG00000100220	0.0028	0.3895	0.0071887				ENSG00000119705	ENSMUSG00000021040	0.1906	0.6069	0.314055				ENSG00000162522	ENSMUSG00000050390	0.1061	0.5301	0.200151
ENSG00000198561	ENSMUSG00000034101	0.0116	0.3998	0.0290145				ENSMUSG00000028868	ENSG00000158195	0.0454	0.3902	0.116351				ENSG00000143870	ENSMUSG00000020571	0.0276	0.6075	0.0454321				ENSG00000165478	ENSMUSG00000046240	0.0246	0.5304	0.0463801
ENSG00000165914	ENSMUSG00000033530	0.0157	0.3999	0.0392598				ENSMUSG00000031467	ENSG00000155189	0.1094	0.3902	0.280369				ENSG00000187134	ENSMUSG00000033715	0.2061	0.6091	0.338368				ENSG00000114331	ENSMUSG00000049076	0.0178	0.5313	0.0335027
ENSG00000169764	ENSMUSG00000001891	0.0053	0.4002	0.0132434				ENSMUSG00000000563	ENSG00000116459	0.1043	0.3906	0.267025				ENSG00000122778	ENSMUSG00000063455	0.1824	0.6095	0.299262				ENSG00000176049	ENSMUSG00000024502	0.0098	0.5322	0.0184141
ENSG00000167699	ENSMUSG00000017286	0.0448	0.4002	0.111944				ENSMUSG00000042425	ENSG00000147234	0.0659	0.3914	0.16837				ENSG00000137486	ENSMUSG00000018909	0.0064	0.6096	0.0104987				ENSG00000137843	ENSMUSG00000074923	0.0359	0.5326	0.0674052
ENSG00000100554	ENSMUSG00000021114	0.0077	0.401	0.019202				ENSMUSG00000026202	ENSG00000127824	0	0.3919	0				ENSG00000138363	ENSMUSG00000026192	0.0476	0.6118	0.0778032				ENSG00000154822	ENSMUSG00000038910	0.0109	0.5346	0.0203891
ENSG00000165434	ENSMUSG00000030729	0.0314	0.4018	0.0781483				ENSMUSG00000022377	ENSG00000153317	0.0188	0.392	0.0479592				ENSG00000116977	ENSMUSG00000057554	0.1274	0.6123	0.208068				ENSG00000119777	ENSMUSG00000038828	0.1035	0.5362	0.193025
ENSG00000158560	ENSMUSG00000029757	0.0096	0.4019	0.0238865				ENSMUSG00000033419	ENSG00000065609	0.0399	0.3921	0.10176				ENSG00000120899	ENSMUSG00000059456	0.0221	0.6142	0.0359818				ENSG00000143862	ENSMUSG00000026426	0.0023	0.5373	0.00428066
ENSG00000143776	ENSMUSG00000026490	0.0196	0.402	0.0487562				ENSMUSG00000029212	ENSG00000163288	0.0087	0.3924	0.0221713				ENSG00000108561	ENSMUSG00000018446	0.0713	0.6147	0.115992				ENSG00000102218	ENSMUSG00000060090	0.0605	0.5378	0.112495
ENSG00000140600	ENSMUSG00000030638	0.0748	0.4024	0.185885				ENSMUSG00000052572	ENSG00000150672	0.0308	0.393	0.0783715				ENSG00000112186	ENSMUSG00000021373	0.0584	0.6148	0.0949902				ENSG00000163214	ENSMUSG00000035051	0.0781	0.5384	0.145059
ENSG00000135439	ENSMUSG00000025422	0.024	0.4026	0.0596125				ENSMUSG00000024597	ENSG00000064651	0.0284	0.3933	0.0722095				ENSG00000128564	ENSMUSG00000037428	0.0702	0.615	0.114146				ENSG00000185477	ENSMUSG00000045441	0.3075	0.5403	0.569128
ENSG00000133318	ENSMUSG00000024758	0.2087	0.4031	0.517738				ENSMUSG00000019978	ENSG00000079819	0.0932	0.3933	0.236969				ENSG00000213366	ENSMUSG00000040562	0.1219	0.6156	0.198018				ENSG00000072195	ENSMUSG00000026207	0.0441	0.5432	0.0811856
ENSG00000116871	ENSMUSG00000028849	0.0688	0.4033	0.170593				ENSMUSG00000005510	ENSG00000213619	0.0726	0.3937	0.184404				ENSG00000128609	ENSMUSG00000023089	0.0967	0.616	0.156981				ENSG00000155858	ENSMUSG00000044847	0.0664	0.5433	0.122216
ENSG00000165280	ENSMUSG00000028452	0.0004	0.4043	0.000989364				ENSMUSG00000037217	ENSG00000008056	0.022	0.3939	0.0558517				ENSG00000165566	ENSMUSG00000021986	0.1048	0.6182	0.169524				ENSG00000105767	ENSMUSG00000054793	0.0083	0.5453	0.015221
ENSG00000100764	ENSMUSG00000021178	0.0004	0.4044	0.00098912				ENSMUSG00000028455	ENSG00000165283	0.0282	0.3944	0.071501				ENSG00000151632	ENSMUSG00000033715	0.2123	0.6193	0.342806				ENSG00000092051	ENSMUSG00000022208	0.0194	0.546	0.0355311
ENSG00000106771	ENSMUSG00000055296	0.0396	0.4049	0.0978019				ENSMUSG00000020321	ENSG00000014641	0.0188	0.3945	0.0476553				ENSG00000186197	ENSMUSG00000039309	0.1439	0.6197	0.232209				ENSG00000186468	ENSMUSG00000073559	0.0203	0.5483	0.0370235
ENSG00000141367	ENSMUSG00000047126	0.0005	0.4052	0.00123396				ENSMUSG00000037259	ENSG00000089091	0.1332	0.3953	0.336959				ENSG00000152137	ENSMUSG00000041548	0.0286	0.6201	0.0461216				ENSG00000004777	ENSMUSG00000036882	0.0433	0.5488	0.0788994
ENSG00000196405	ENSMUSG00000021262	0.0297	0.4054	0.073261				ENSMUSG00000024259	ENSG00000164209	0.0572	0.3956	0.14459				ENSG00000156453	ENSMUSG00000051375	0.0329	0.6215	0.0529364				ENSG00000130956	ENSMUSG00000021476	0.0857	0.549	0.156102
ENSG00000205339	ENSMUSG00000066232	0.0026	0.4057	0.00640868				ENSMUSG00000018733	ENSG00000108733	0.0646	0.3957	0.163255				ENSG00000157020	ENSMUSG00000030298	0.0141	0.6215	0.022687				ENSG00000036530	ENSMUSG00000021259	0.0236	0.5504	0.0428779
ENSG00000179915	ENSMUSG00000024109	0.0051	0.4068	0.0125369				ENSMUSG00000010803	ENSG00000022355	0.0061	0.3962	0.0153963				ENSG00000103415	ENSMUSG00000004070	0.0548	0.6257	0.0875819				ENSG00000121057	ENSMUSG00000018428	0.19	0.5512	0.344702
ENSG00000069329	ENSMUSG00000031696	0.003	0.407	0.00737101				ENSMUSG00000032601	ENSG00000114302	0.0903	0.3968	0.227571				ENSG00000198721	ENSMUSG00000021417	0.1493	0.6274	0.237966				ENSG00000154127	ENSMUSG00000032020	0.0115	0.5518	0.0208409
ENSG00000147853	ENSMUSG00000024782	0.0381	0.4072	0.0935658				ENSMUSG00000061244	ENSG00000070367	0.0076	0.3972	0.0191339				ENSG00000066557	ENSMUSG00000063052	0.0996	0.6275	0.158725				ENSG00000134115	ENSMUSG00000030092	0.054	0.5524	0.0977552
ENSG00000156508	ENSMUSG00000037742	0.001	0.4075	0.00245399				ENSMUSG00000028176	ENSG00000033122	0.022	0.3974	0.0553598				ENSG00000100401	ENSMUSG00000022391	0.0574	0.629	0.091256				ENSG00000164199	ENSMUSG00000069170	0.1138	0.5551	0.205008
ENSG00000067900	ENSMUSG00000024290	0.015	0.4076	0.0368008				ENSMUSG00000007739	ENSG00000115484	0.0158	0.3979	0.0397085				ENSG00000213088	ENSMUSG00000037872	0.3473	0.6352	0.546757				ENSG00000162300	ENSMUSG00000024792	0.0386	0.5566	0.0693496
ENSG00000106299	ENSMUSG00000029684	0.0195	0.4078	0.0478176				ENSMUSG00000026553	ENSG00000122218	0.0074	0.3982	0.0185836				ENSG00000068903	ENSMUSG00000015149	0.0681	0.6381	0.106723				ENSG00000107816	ENSMUSG00000035342	0.0376	0.5571	0.0674924
ENSG00000149269	ENSMUSG00000030774	0.0323	0.4086	0.0790504				ENSMUSG00000021124	ENSG00000100568	0.0378	0.3987	0.0948081				ENSG00000075539	ENSMUSG00000070733	0.0266	0.6381	0.0416863				ENSG00000197969	ENSMUSG00000046230	0.0856	0.5577	0.153488
ENSG00000104490	ENSMUSG00000051359	0	0.4093	0				ENSMUSG00000027012	ENSG00000077380	0.0099	0.3989	0.0248183				ENSG00000102606	ENSMUSG00000031511	0.0266	0.6396	0.0415885				ENSG00000124222	ENSMUSG00000027522	0.0322	0.5613	0.0573668
ENSG00000047849	ENSMUSG00000032479	0.2619	0.4097	0.639248				ENSMUSG00000007617	ENSG00000152413	0.0111	0.3996	0.0277778				ENSG00000162688	ENSMUSG00000033400	0.0409	0.6401	0.0638963				ENSG00000123908	ENSMUSG00000036698	0.0036	0.5629	0.00639545
ENSG00000134287	ENSMUSG00000051853	0	0.41	0				ENSMUSG00000035770	ENSG00000135720	0.0146	0.3996	0.0365365				ENSG00000125633	ENSMUSG00000026339	0.0403	0.6421	0.0627628				ENSG00000161267	ENSMUSG00000046598	0.0722	0.5645	0.127901
ENSG00000198513	ENSMUSG00000021066	0.0165	0.4112	0.0401265				ENSMUSG00000034101	ENSG00000198561	0.0116	0.3998	0.0290145				ENSG00000105223	ENSMUSG00000003363	0.0301	0.644	0.0467391				ENSG00000177600	ENSMUSG00000025508	0.0044	0.5649	0.00778899
ENSG00000087470	ENSMUSG00000022789	0.006	0.4124	0.014549				ENSMUSG00000032740	ENSG00000115355	0.0254	0.3998	0.0635318				ENSG00000177963	ENSMUSG00000025485	0.0647	0.6446	0.100372				ENSG00000149658	ENSMUSG00000038848	0.0309	0.565	0.0546903
ENSG00000142507	ENSMUSG00000018286	0.0335	0.4127	0.0811728				ENSMUSG00000033530	ENSG00000165914	0.0157	0.3999	0.0392598				ENSG00000175220	ENSMUSG00000027247	0.0176	0.6471	0.0271983				ENSG00000161647	ENSMUSG00000052373	0.0448	0.5651	0.079278
ENSG00000169398	ENSMUSG00000022607	0.0128	0.4129	0.0310002				ENSMUSG00000045302	ENSG00000138073	0.0646	0.4006	0.161258				ENSG00000115520	ENSMUSG00000025981	0.0822	0.6477	0.126911				ENSG00000175497	ENSMUSG00000036815	0.0625	0.5655	0.110522
ENSG00000136152	ENSMUSG00000034893	0.0202	0.4131	0.0488986				ENSMUSG00000046671	ENSG00000117640	0.0202	0.4009	0.0503866				ENSG00000144908	ENSMUSG00000030088	0.0395	0.6484	0.0609192				ENSG00000163637	ENSMUSG00000030020	0.0209	0.5697	0.036686
ENSG00000145819	ENSMUSG00000036452	0.0141	0.4133	0.0341157				ENSMUSG00000021114	ENSG00000100554	0.0077	0.401	0.019202				ENSG00000148175	ENSMUSG00000026880	0.0726	0.6487	0.111916				ENSG00000119523	ENSMUSG00000039740	0.1188	0.5698	0.208494
ENSG00000080371	ENSMUSG00000020132	0.0108	0.4142	0.0260744				ENSMUSG00000029757	ENSG00000158560	0.0096	0.4019	0.0238865				ENSG00000116266	ENSMUSG00000071640	0.0789	0.649	0.121572				ENSG00000136531	ENSMUSG00000075318	0.0103	0.5714	0.0180259
ENSG00000185046	ENSMUSG00000058589	0.0421	0.4145	0.101568				ENSMUSG00000026490	ENSG00000143776	0.0196	0.402	0.0487562				ENSG00000050405	ENSMUSG00000023022	0.1394	0.6493	0.214693				ENSG00000149256	ENSMUSG00000048078	0.0126	0.5715	0.0220472
ENSG00000137076	ENSMUSG00000028465	0.0063	0.4148	0.015188				ENSMUSG00000034653	ENSG00000047188	0.0135	0.4024	0.0335487				ENSG00000156931	ENSMUSG00000033653	0.0376	0.6509	0.0577662				ENSG00000103018	ENSMUSG00000031924	0.1457	0.5729	0.25432
ENSG00000075711	ENSMUSG00000022770	0.0213	0.4152	0.0513006				ENSMUSG00000024777	ENSG00000068971	0.0054	0.4026	0.0134128				ENSG00000102189	ENSMUSG00000036499	0.0842	0.6518	0.129181				ENSG00000150995	ENSMUSG00000030102	0.0053	0.576	0.00920139
ENSG00000163344	ENSMUSG00000027952	0.0907	0.4165	0.217767				ENSMUSG00000025422	ENSG00000135439	0.024	0.4026	0.0596125				ENSG00000132932	ENSMUSG00000021983	0.0291	0.6525	0.0445977				ENSG00000128524	ENSMUSG00000004285	0.0072	0.5789	0.0124374
ENSG00000138138	ENSMUSG00000013662	0	0.417	0				ENSMUSG00000024758	ENSG00000133318	0.2087	0.4031	0.517738				ENSG00000177156	ENSMUSG00000025503	0.0273	0.6536	0.0417687				ENSG00000176406	ENSMUSG00000037386	0.0526	0.579	0.0908463
ENSG00000109107	ENSMUSG00000017390	0.0106	0.417	0.0254197				ENSMUSG00000028849	ENSG00000116871	0.0688	0.4033	0.170593				ENSG00000121053	ENSMUSG00000052234	0.0558	0.6549	0.0852038				ENSG00000147403	ENSMUSG00000008682	0	0.5791	0
ENSG00000213281	ENSMUSG00000027852	0.0024	0.4173	0.00575126				ENSMUSG00000047976	ENSG00000111262	0.0069	0.4036	0.0170961				ENSG00000163346	ENSMUSG00000042613	0.1718	0.6559	0.26193				ENSG00000147403	ENSMUSG00000058443	0	0.5791	0
ENSG00000196220	ENSMUSG00000030257	0.006	0.4174	0.0143747				ENSMUSG00000028452	ENSG00000165280	0.0004	0.4043	0.000989364				ENSG00000168589	ENSMUSG00000034467	0.0097	0.6574	0.0147551				ENSG00000130724	ENSMUSG00000033916	0.0019	0.5797	0.00327756
ENSG00000176105	ENSMUSG00000014932	0.0173	0.4174	0.0414471				ENSMUSG00000021178	ENSG00000100764	0.0004	0.4044	0.00098912				ENSG00000147459	ENSMUSG00000044447	0.0305	0.6582	0.0463385				ENSG00000151846	ENSMUSG00000046173	0.1326	0.5842	0.226977
ENSG00000106028	ENSMUSG00000029911	0.1028	0.4174	0.246287				ENSMUSG00000036948	ENSG00000146826	0.0178	0.405	0.0439506				ENSG00000171564	ENSMUSG00000033831	0.0916	0.6627	0.138222				ENSG00000005108	ENSMUSG00000032625	0.0467	0.5845	0.0798973
ENSG00000109846	ENSMUSG00000032060	0.0106	0.4183	0.0253407				ENSMUSG00000047126	ENSG00000141367	0.0005	0.4052	0.00123396				ENSG00000182054	ENSMUSG00000030541	0.0218	0.6628	0.0328908				ENSG00000089693	ENSMUSG00000030120	0.0125	0.5845	0.0213858
ENSG00000106278	ENSMUSG00000068748	0.097	0.4203	0.230788				ENSMUSG00000021262	ENSG00000196405	0.0297	0.4054	0.073261				ENSG00000132612	ENSMUSG00000031913	0.0041	0.6648	0.00616727				ENSG00000184368	ENSMUSG00000041020	0.1463	0.5857	0.249787
ENSG00000075239	ENSMUSG00000032047	0.086	0.4204	0.204567				ENSMUSG00000020486	ENSG00000108387	0.0369	0.4058	0.0909315				ENSG00000100266	ENSMUSG00000016664	0.0308	0.6693	0.0460182				ENSG00000198055	ENSMUSG00000074886	0.0199	0.5865	0.0339301
ENSG00000068796	ENSMUSG00000021693	0.0106	0.4211	0.0251722				ENSMUSG00000073422	ENSG00000204228	0.0647	0.4059	0.159399				ENSG00000075624	ENSMUSG00000029580	0.0022	0.6694	0.00328653				ENSG00000099968	ENSMUSG00000009112	0.1496	0.5871	0.254812
ENSG00000108774	ENSMUSG00000019173	0.0063	0.4212	0.0149573				ENSMUSG00000041688	ENSG00000126016	0.0597	0.4066	0.146827				ENSG00000214253	ENSMUSG00000019054	0.0202	0.6698	0.0301583				ENSG00000078070	ENSMUSG00000027709	0.0855	0.5883	0.145334
ENSG00000175166	ENSMUSG00000006998	0.0063	0.4226	0.0149077				ENSMUSG00000024109	ENSG00000179915	0.0051	0.4068	0.0125369				ENSG00000104267	ENSMUSG00000027562	0.1117	0.6729	0.165998				ENSG00000138650	ENSMUSG00000049100	0.0161	0.589	0.0273345
ENSG00000163618	ENSMUSG00000054423	0.0065	0.4227	0.0153773				ENSMUSG00000007440	ENSG00000243232	0.0356	0.4068	0.0875123				ENSG00000115415	ENSMUSG00000026104	0.0336	0.6756	0.0497336				ENSG00000196230	ENSMUSG00000001525	0	0.5904	0
ENSG00000028528	ENSMUSG00000032382	0.0249	0.4228	0.0588931				ENSMUSG00000031696	ENSG00000069329	0.003	0.407	0.00737101				ENSG00000137168	ENSMUSG00000024007	0.0084	0.678	0.0123894				ENSG00000141404	ENSMUSG00000024524	0.0402	0.5909	0.0680318
ENSG00000101557	ENSMUSG00000047879	0.0158	0.4229	0.0373611				ENSMUSG00000037742	ENSG00000156508	0.001	0.4075	0.00245399				ENSG00000187134	ENSMUSG00000021211	0.2088	0.6793	0.307375				ENSG00000169282	ENSMUSG00000027827	0.0842	0.5909	0.142494
ENSG00000111674	ENSMUSG00000004267	0.0083	0.4236	0.019594				ENSMUSG00000029684	ENSG00000106299	0.0195	0.4078	0.0478176				ENSG00000187134	ENSMUSG00000021213	0.2224	0.6807	0.326722				ENSG00000119401	ENSMUSG00000051675	0.0208	0.5942	0.035005
ENSG00000156467	ENSMUSG00000021520	0.068	0.4249	0.160038				ENSMUSG00000030774	ENSG00000149269	0.0323	0.4086	0.0790504				ENSG00000065054	ENSMUSG00000002504	0.0395	0.6812	0.0579859				ENSG00000147642	ENSMUSG00000022340	0.0788	0.5951	0.132415
ENSG00000118705	ENSMUSG00000027642	0.0421	0.425	0.0990588				ENSMUSG00000033676	ENSG00000166206	0.0329	0.4092	0.0804008				ENSG00000102178	ENSMUSG00000015290	0.0519	0.6824	0.0760551				ENSG00000151846	ENSMUSG00000051732	0.1459	0.5952	0.245128
ENSG00000171497	ENSMUSG00000027804	0.0294	0.4253	0.0691277				ENSMUSG00000051359	ENSG00000104490	0	0.4093	0				ENSG00000187134	ENSMUSG00000054757	0.1593	0.6827	0.233338				ENSG00000153820	ENSMUSG00000026163	0.1635	0.5961	0.274283
ENSG00000115419	ENSMUSG00000026103	0.0522	0.4254	0.122708				ENSMUSG00000051853	ENSG00000134287	0	0.41	0				ENSG00000215642	ENSMUSG00000059854	0.1013	0.6834	0.148229				ENSG00000138669	ENSMUSG00000029334	0.0153	0.599	0.0255426
ENSG00000133812	ENSMUSG00000038371	0.03	0.4257	0.0704722				ENSMUSG00000040612	ENSG00000143195	0.0438	0.4103	0.106751				ENSG00000102882	ENSMUSG00000063065	0.0124	0.6846	0.0181128				ENSG00000119013	ENSMUSG00000026032	0.1361	0.6023	0.225967
ENSG00000087274	ENSMUSG00000029106	0.0394	0.4258	0.0925317				ENSMUSG00000015214	ENSG00000063601	0.0335	0.4107	0.0815681				ENSG00000139116	ENSMUSG00000022629	0.0291	0.6856	0.0424446				ENSG00000111664	ENSMUSG00000023439	0.0141	0.6037	0.023356
ENSG00000151729	ENSMUSG00000031633	0.0207	0.4262	0.0485687				ENSMUSG00000027737	ENSG00000151012	0.0572	0.4114	0.139037				ENSG00000213366	ENSMUSG00000004035	0.0893	0.6867	0.130042				ENSG00000103502	ENSMUSG00000030682	0.0165	0.6038	0.0273269
ENSG00000170606	ENSMUSG00000020361	0.02	0.4267	0.0468713				ENSMUSG00000025277	ENSG00000163686	0.0281	0.4117	0.0682536				ENSG00000213366	ENSMUSG00000068762	0.1386	0.6914	0.200463				ENSG00000184408	ENSMUSG00000060882	0.0044	0.6038	0.00728718
ENSG00000186298	ENSMUSG00000004455	0.0014	0.4273	0.00327639				ENSMUSG00000027944	ENSG00000143575	0.1024	0.4118	0.248664				ENSG00000138768	ENSMUSG00000029407	0.0749	0.6955	0.107692				ENSG00000061918	ENSMUSG00000028005	0.0053	0.6052	0.00875744
ENSG00000090621	ENSMUSG00000011257	0.0109	0.4273	0.025509				ENSMUSG00000022789	ENSG00000087470	0.006	0.4124	0.014549				ENSG00000013364	ENSMUSG00000030681	0.045	0.696	0.0646552				ENSG00000196497	ENSMUSG00000002319	0.1035	0.6073	0.170426
ENSG00000122359	ENSMUSG00000021866	0.0339	0.4273	0.0793354				ENSMUSG00000018286	ENSG00000142507	0.0335	0.4127	0.0811728				ENSG00000198721	ENSMUSG00000021416	0.2112	0.6961	0.303405				ENSG00000118733	ENSMUSG00000027965	0.024	0.6078	0.0394867
ENSG00000136888	ENSMUSG00000039105	0.0258	0.4274	0.060365				ENSMUSG00000022489	ENSG00000123360	0.02	0.4128	0.0484496				ENSG00000076356	ENSMUSG00000026640	0.0167	0.6968	0.0239667				ENSG00000177272	ENSMUSG00000047959	0.0124	0.608	0.0203947
ENSG00000100934	ENSMUSG00000020986	0.0048	0.4276	0.0112254				ENSMUSG00000036452	ENSG00000145819	0.0141	0.4133	0.0341157				ENSG00000151632	ENSMUSG00000054757	0.1659	0.6987	0.237441				ENSG00000165802	ENSMUSG00000006476	0.0261	0.609	0.0428571
ENSG00000155008	ENSMUSG00000025525	0.1334	0.4276	0.311974				ENSMUSG00000027134	ENSG00000176454	0.0346	0.4133	0.0837164				ENSG00000108828	ENSMUSG00000034993	0.0463	0.6988	0.0662564				ENSG00000071553	ENSMUSG00000019087	0.0777	0.6121	0.12694
ENSG00000084764	ENSMUSG00000029166	0.0032	0.428	0.00747664				ENSMUSG00000058589	ENSG00000185046	0.0421	0.4145	0.101568				ENSG00000173599	ENSMUSG00000024892	0.0151	0.6994	0.0215899				ENSG00000168481	ENSMUSG00000033595	0.0156	0.6148	0.0253741
ENSG00000161203	ENSMUSG00000022841	0	0.4282	0				ENSMUSG00000042846	ENSG00000198739	0.011	0.4146	0.0265316				ENSG00000151632	ENSMUSG00000021211	0.2109	0.6996	0.301458				ENSG00000006071	ENSMUSG00000040136	0.0229	0.6173	0.037097
ENSG00000070808	ENSMUSG00000024617	0.0009	0.4282	0.00210182				ENSMUSG00000022770	ENSG00000075711	0.0213	0.4152	0.0513006				ENSG00000151632	ENSMUSG00000021213	0.225	0.7002	0.321337				ENSG00000157654	ENSMUSG00000089945	0.1013	0.6212	0.163071
ENSG00000166974	ENSMUSG00000024277	0.0125	0.4283	0.0291852				ENSMUSG00000013662	ENSG00000138138	0	0.417	0				ENSG00000125844	ENSMUSG00000027422	0.0765	0.704	0.108665				ENSG00000166689	ENSMUSG00000045659	0.0611	0.622	0.0982315
ENSG00000107679	ENSMUSG00000040268	0.0515	0.4284	0.120215				ENSMUSG00000017390	ENSG00000109107	0.0106	0.417	0.0254197				ENSG00000171557	ENSMUSG00000033860	0.0947	0.7046	0.134402				ENSG00000093100	ENSMUSG00000003178	0.0549	0.6221	0.0882495
ENSG00000034713	ENSMUSG00000031950	0	0.4287	0				ENSMUSG00000030257	ENSG00000196220	0.006	0.4174	0.0143747				ENSG00000187134	ENSMUSG00000025955	0.1779	0.706	0.251983				ENSG00000103035	ENSMUSG00000039067	0.0166	0.6257	0.0265303
ENSG00000111667	ENSMUSG00000038429	0.0077	0.4289	0.0179529				ENSMUSG00000014932	ENSG00000176105	0.0173	0.4174	0.0414471				ENSG00000151632	ENSMUSG00000071551	0.1806	0.7062	0.255735				ENSG00000148719	ENSMUSG00000020109	0.0273	0.6303	0.0433127
ENSG00000065427	ENSMUSG00000031948	0.0397	0.4295	0.0924331				ENSMUSG00000029911	ENSG00000106028	0.1028	0.4174	0.246287				ENSG00000076864	ENSMUSG00000041351	0.0149	0.7072	0.021069				ENSG00000105894	ENSMUSG00000029838	0.0134	0.6304	0.0212563
ENSG00000149084	ENSMUSG00000027195	0.1113	0.4298	0.258958				ENSMUSG00000023036	ENSG00000240764	0.0377	0.4175	0.0902994				ENSG00000107957	ENSMUSG00000053617	0.0443	0.7077	0.0625971				ENSG00000108298	ENSMUSG00000017404	0	0.6307	0
ENSG00000120438	ENSMUSG00000068039	0.0182	0.4307	0.0422568				ENSMUSG00000031007	ENSG00000182220	0.034	0.4176	0.0814176				ENSG00000183735	ENSMUSG00000020115	0.0307	0.7089	0.0433065				ENSG00000008988	ENSMUSG00000028234	0	0.6308	0
ENSG00000091140	ENSMUSG00000020664	0.0243	0.4311	0.0563674				ENSMUSG00000058558	ENSG00000122406	0.0075	0.4179	0.0179469				ENSG00000133315	ENSMUSG00000036278	0.0735	0.7103	0.103477				ENSG00000188089	ENSMUSG00000050211	0.1452	0.6314	0.229965
ENSG00000092964	ENSMUSG00000022048	0.0056	0.4314	0.012981				ENSMUSG00000071415	ENSG00000125691	0	0.4184	0				ENSG00000112294	ENSMUSG00000035936	0.0867	0.7109	0.121958				ENSG00000134313	ENSMUSG00000036333	0.0297	0.6315	0.0470309
ENSG00000173210	ENSMUSG00000032735	0.0091	0.432	0.0210648				ENSMUSG00000001175	ENSG00000198668	0	0.4188	0				ENSG00000151632	ENSMUSG00000025955	0.1894	0.7113	0.266273				ENSG00000196361	ENSMUSG00000003410	0.0023	0.6316	0.00364155
ENSG00000197157	ENSMUSG00000001424	0.0122	0.4321	0.0282342				ENSMUSG00000036026	ENSG00000137216	0.0082	0.4203	0.0195099				ENSG00000204128	ENSMUSG00000026227	0.1803	0.7135	0.252698				ENSG00000141452	ENSMUSG00000024410	0.0255	0.6335	0.0402526
ENSG00000008277	ENSMUSG00000040537	0.0444	0.4321	0.102754				ENSMUSG00000068748	ENSG00000106278	0.097	0.4203	0.230788				ENSG00000096696	ENSMUSG00000054889	0.0232	0.7152	0.0324385				ENSG00000176749	ENSMUSG00000048895	0.0067	0.6357	0.0105396
ENSG00000165219	ENSMUSG00000026867	0.0102	0.4329	0.023562				ENSMUSG00000032047	ENSG00000075239	0.086	0.4204	0.204567				ENSG00000005381	ENSMUSG00000009350	0.0775	0.7161	0.108225				ENSG00000131323	ENSMUSG00000021277	0.017	0.6361	0.0267254
ENSG00000151929	ENSMUSG00000030847	0.0798	0.4333	0.184168				ENSMUSG00000021693	ENSG00000068796	0.0106	0.4211	0.0251722				ENSG00000187134	ENSMUSG00000071551	0.1769	0.7165	0.246895				ENSG00000073670	ENSMUSG00000020926	0.0305	0.6376	0.0478356
ENSG00000074319	ENSMUSG00000014402	0.0255	0.4334	0.0588371				ENSMUSG00000019173	ENSG00000108774	0.0063	0.4212	0.0149573				ENSG00000161618	ENSMUSG00000007833	0.1104	0.7177	0.153825				ENSG00000117114	ENSMUSG00000028184	0.0213	0.6402	0.0332709
ENSG00000100387	ENSMUSG00000022400	0	0.4341	0				ENSMUSG00000053310	ENSG00000154146	0.0175	0.4213	0.0415381				ENSG00000105254	ENSMUSG00000006095	0.0558	0.7186	0.077651				ENSG00000135824	ENSMUSG00000042671	0.03	0.6404	0.0468457
ENSG00000149182	ENSMUSG00000027255	0.0363	0.4342	0.083602				ENSMUSG00000028759	ENSG00000127483	0.0512	0.4217	0.121413				ENSG00000132613	ENSMUSG00000033763	0.0226	0.7192	0.0314238				ENSG00000185274	ENSMUSG00000034040	0.0067	0.644	0.0104037
ENSG00000127838	ENSMUSG00000026179	0.0192	0.4354	0.0440974				ENSMUSG00000078622	ENSG00000108588	0.009	0.4225	0.0213018				ENSG00000071127	ENSMUSG00000005103	0.0227	0.7209	0.0314884				ENSG00000213023	ENSMUSG00000030731	0.0167	0.6464	0.0258354
ENSG00000197535	ENSMUSG00000034593	0.0148	0.4356	0.0339761				ENSMUSG00000006998	ENSG00000175166	0.0063	0.4226	0.0149077				ENSG00000089220	ENSMUSG00000047104	0.0911	0.7227	0.126055				ENSG00000079691	ENSMUSG00000021338	0.056	0.6471	0.0865399
ENSG00000120063	ENSMUSG00000020611	0.017	0.4358	0.0390087				ENSMUSG00000054423	ENSG00000163618	0.0065	0.4227	0.0153773				ENSG00000159231	ENSMUSG00000022947	0.0796	0.7241	0.10993				ENSG00000110697	ENSMUSG00000024851	0.0325	0.6473	0.0502086
ENSG00000147684	ENSMUSG00000022354	0.0802	0.4361	0.183903				ENSMUSG00000028351	ENSG00000078725	0.0052	0.4229	0.0122961				ENSG00000116288	ENSMUSG00000028964	0.0495	0.7255	0.0682288				ENSG00000119421	ENSMUSG00000026895	0.0786	0.6481	0.121278
ENSG00000130830	ENSMUSG00000031402	0.0381	0.4365	0.0872852				ENSMUSG00000024588	ENSG00000066926	0.063	0.4231	0.148901				ENSG00000174791	ENSMUSG00000024883	0.1283	0.7291	0.17597				ENSG00000100284	ENSMUSG00000042870	0.0561	0.6503	0.0862679
ENSG00000130725	ENSMUSG00000005575	0	0.4368	0				ENSMUSG00000004267	ENSG00000111674	0.0083	0.4236	0.019594				ENSG00000004939	ENSMUSG00000006574	0.103	0.73	0.141096				ENSG00000100284	ENSMUSG00000037827	0.0561	0.6503	0.0862679
ENSG00000123338	ENSMUSG00000022488	0.0255	0.4368	0.0583791				ENSMUSG00000037533	ENSG00000158987	0.0425	0.4236	0.100331				ENSG00000068976	ENSMUSG00000032648	0.0139	0.7326	0.0189735				ENSG00000189127	ENSMUSG00000045034	0.1044	0.6524	0.160025
ENSG00000069535	ENSMUSG00000040147	0.0575	0.4372	0.131519				ENSMUSG00000027642	ENSG00000118705	0.0421	0.425	0.0990588				ENSG00000110931	ENSMUSG00000029471	0.0545	0.7363	0.0740187				ENSG00000196730	ENSMUSG00000021559	0.0238	0.6527	0.0364639
ENSG00000172164	ENSMUSG00000060429	0.0325	0.4378	0.0742348				ENSMUSG00000027804	ENSG00000171497	0.0294	0.4253	0.0691277				ENSG00000187134	ENSMUSG00000021207	0.1679	0.7402	0.226831				ENSG00000143811	ENSMUSG00000026520	0.0377	0.6544	0.05761
ENSG00000163539	ENSMUSG00000033392	0.019	0.438	0.043379				ENSMUSG00000026103	ENSG00000115419	0.0522	0.4254	0.122708				ENSG00000100092	ENSMUSG00000022436	0.1038	0.7427	0.13976				ENSG00000108370	ENSMUSG00000020599	0.0451	0.6546	0.068897
ENSG00000166340	ENSMUSG00000030894	0.0637	0.4385	0.145268				ENSMUSG00000029106	ENSG00000087274	0.0394	0.4258	0.0925317				ENSG00000138796	ENSMUSG00000027984	0.0516	0.7449	0.069271				ENSG00000169213	ENSMUSG00000003411	0.0121	0.6558	0.0184507
ENSG00000127603	ENSMUSG00000028649	0.1143	0.4386	0.260602				ENSMUSG00000031633	ENSG00000151729	0.0207	0.4262	0.0485687				ENSG00000148356	ENSMUSG00000026792	0.0637	0.7472	0.0852516				ENSG00000104427	ENSMUSG00000043542	0.0684	0.6588	0.103825
ENSG00000125354	ENSMUSG00000050379	0.0187	0.439	0.0425968				ENSMUSG00000020361	ENSG00000170606	0.02	0.4267	0.0468713				ENSG00000168439	ENSMUSG00000024966	0.0128	0.7489	0.0170917				ENSG00000074416	ENSMUSG00000033174	0.0864	0.6651	0.129905
ENSG00000166794	ENSMUSG00000032383	0.0294	0.439	0.0669704				ENSMUSG00000004455	ENSG00000186298	0.0014	0.4273	0.00327639				ENSG00000187134	ENSMUSG00000021210	0.1443	0.7499	0.192426				ENSG00000089154	ENSMUSG00000041638	0.031	0.6682	0.0463933
ENSG00000142945	ENSMUSG00000028678	0.0642	0.4395	0.146075				ENSMUSG00000011257	ENSG00000090621	0.0109	0.4273	0.025509				ENSG00000213366	ENSMUSG00000027890	0.1278	0.751	0.170173				ENSG00000138326	ENSMUSG00000025290	0.0106	0.6687	0.0158517
ENSG00000110514	ENSMUSG00000040687	0.0258	0.4406	0.0585565				ENSMUSG00000039105	ENSG00000136888	0.0258	0.4274	0.060365				ENSG00000010278	ENSMUSG00000030342	0.0606	0.7533	0.080446				ENSG00000110108	ENSMUSG00000034659	0.1588	0.6688	0.23744
ENSG00000061676	ENSMUSG00000027002	0.0028	0.4409	0.00635065				ENSMUSG00000025525	ENSG00000155008	0.1334	0.4276	0.311974				ENSG00000106992	ENSMUSG00000026817	0.0574	0.7554	0.0759862				ENSG00000103056	ENSMUSG00000031906	0.0438	0.67	0.0653731
ENSG00000180228	ENSMUSG00000002731	0.0106	0.4413	0.0240199				ENSMUSG00000029166	ENSG00000084764	0.0032	0.428	0.00747664				ENSG00000151632	ENSMUSG00000021207	0.1673	0.7571	0.220975				ENSG00000073910	ENSMUSG00000056602	0.0156	0.6716	0.0232281
ENSG00000134769	ENSMUSG00000024302	0.0164	0.4414	0.0371545				ENSMUSG00000022841	ENSG00000161203	0	0.4282	0				ENSG00000111344	ENSMUSG00000029602	0.0738	0.7601	0.0970925				ENSG00000161835	ENSMUSG00000000531	0.0425	0.6724	0.0632064
ENSG00000104412	ENSMUSG00000022337	0.0118	0.4419	0.0267029				ENSMUSG00000024617	ENSG00000070808	0.0009	0.4282	0.00210182				ENSG00000103496	ENSMUSG00000030805	0.0454	0.7624	0.0595488				ENSG00000100243	ENSMUSG00000018042	0.0588	0.6755	0.0870466
ENSG00000175203	ENSMUSG00000025410	0.0204	0.442	0.0461538				ENSMUSG00000004366	ENSG00000157005	0.0162	0.4283	0.037824				ENSG00000151632	ENSMUSG00000021210	0.1532	0.7634	0.200681				ENSG00000122574	ENSMUSG00000086040	0.1499	0.6774	0.221287
ENSG00000088367	ENSMUSG00000027624	0.0218	0.4422	0.049299				ENSMUSG00000031950	ENSG00000034713	0	0.4287	0				ENSG00000143799	ENSMUSG00000026496	0.0373	0.7647	0.0487773				ENSG00000152128	ENSMUSG00000026347	0.0533	0.6781	0.078602
ENSG00000140416	ENSMUSG00000032366	0.0955	0.4424	0.215868				ENSMUSG00000039913	ENSG00000101349	0.0291	0.4288	0.0678638				ENSG00000196924	ENSMUSG00000031328	0.0138	0.7686	0.0179547				ENSG00000068383	ENSMUSG00000025477	0.029	0.6795	0.0426784
ENSG00000031698	ENSMUSG00000068739	0.0207	0.4427	0.0467585				ENSMUSG00000038429	ENSG00000111667	0.0077	0.4289	0.0179529				ENSG00000167460	ENSMUSG00000031799	0.1017	0.771	0.131907				ENSG00000184588	ENSMUSG00000028525	0.0905	0.6815	0.132795
ENSG00000138411	ENSMUSG00000042807	0.0241	0.4432	0.0543773				ENSMUSG00000000600	ENSG00000001631	0.0277	0.4293	0.0645236				ENSG00000110711	ENSMUSG00000024847	0.0254	0.7783	0.0326352				ENSG00000086289	ENSMUSG00000002808	0.1132	0.6823	0.165909
ENSG00000186469	ENSMUSG00000043004	0	0.444	0				ENSMUSG00000031948	ENSG00000065427	0.0397	0.4295	0.0924331				ENSG00000121769	ENSMUSG00000028773	0.0788	0.7823	0.100729				ENSG00000067248	ENSMUSG00000042426	0.0477	0.6825	0.0698901
ENSG00000092108	ENSMUSG00000020952	0.0175	0.4441	0.0394055				ENSMUSG00000027195	ENSG00000149084	0.1113	0.4298	0.258958				ENSG00000181061	ENSMUSG00000038412	0.0705	0.7946	0.0887239				ENSG00000173175	ENSMUSG00000022840	0.0197	0.6839	0.0288054
ENSG00000164398	ENSMUSG00000020333	0.0585	0.4443	0.131668				ENSMUSG00000052146	ENSG00000124614	0.0058	0.4299	0.0134915				ENSG00000105379	ENSMUSG00000004610	0.0886	0.7979	0.111041				ENSG00000122026	ENSMUSG00000060566	0.0244	0.6842	0.0356621
ENSG00000128512	ENSMUSG00000035954	0.0075	0.4453	0.0168426				ENSMUSG00000022995	ENSG00000154380	0.0542	0.4306	0.125871				ENSG00000141556	ENSMUSG00000039230	0.1059	0.7989	0.132557				ENSG00000196072	ENSMUSG00000057506	0.0253	0.6866	0.0368482
ENSG00000198399	ENSMUSG00000020640	0.033	0.4453	0.0741073				ENSMUSG00000068039	ENSG00000120438	0.0182	0.4307	0.0422568				ENSG00000159423	ENSMUSG00000028737	0.0406	0.7993	0.0507944				ENSG00000131469	ENSMUSG00000063316	0.0007	0.6875	0.00101818
ENSG00000108528	ENSMUSG00000014606	0.0165	0.4454	0.0370454				ENSMUSG00000027810	ENSG00000144895	0.0331	0.4307	0.0768516				ENSG00000197448	ENSMUSG00000029864	0.1658	0.8	0.20725				ENSG00000180096	ENSMUSG00000000486	0.0197	0.6884	0.0286171
ENSG00000083799	ENSMUSG00000036712	0.0245	0.4456	0.054982				ENSMUSG00000020664	ENSG00000091140	0.0243	0.4311	0.0563674				ENSG00000170634	ENSMUSG00000060923	0.0908	0.8036	0.112992				ENSG00000165238	ENSMUSG00000037989	0.1176	0.6931	0.169672
ENSG00000103423	ENSMUSG00000004069	0.0704	0.4459	0.157883				ENSMUSG00000022048	ENSG00000092964	0.0056	0.4314	0.012981				ENSG00000186907	ENSMUSG00000050896	0.0212	0.8065	0.0262864				ENSG00000170473	ENSMUSG00000064030	0.0501	0.6956	0.0720242
ENSG00000144040	ENSMUSG00000033720	0.0155	0.4461	0.0347456				ENSMUSG00000032735	ENSG00000173210	0.0091	0.432	0.0210648				ENSG00000133731	ENSMUSG00000027531	0.073	0.8171	0.0893404				ENSG00000099889	ENSMUSG00000000325	0.0434	0.6987	0.0621154
ENSG00000188846	ENSMUSG00000025794	0.0773	0.4462	0.173241				ENSMUSG00000001424	ENSG00000197157	0.0122	0.4321	0.0282342				ENSG00000168490	ENSMUSG00000003469	0.0025	0.8175	0.0030581				ENSG00000142549	ENSMUSG00000013367	0.0089	0.701	0.0126961
ENSG00000134318	ENSMUSG00000020580	0.0159	0.4467	0.0355944				ENSMUSG00000040537	ENSG00000008277	0.0444	0.4321	0.102754				ENSG00000149823	ENSMUSG00000024797	0.0194	0.8226	0.0235838				ENSG00000151491	ENSMUSG00000015766	0.055	0.7059	0.0779147
ENSG00000183715	ENSMUSG00000062257	0.0346	0.4475	0.0773184				ENSMUSG00000014402	ENSG00000074319	0.0255	0.4334	0.0588371				ENSG00000213366	ENSMUSG00000091578	0.1129	0.8274	0.136452				ENSG00000137154	ENSMUSG00000028495	0.0007	0.7072	0.000989819
ENSG00000204681	ENSMUSG00000024462	0.0057	0.4478	0.0127289				ENSMUSG00000022400	ENSG00000100387	0	0.4341	0				ENSG00000144712	ENSMUSG00000030319	0.0501	0.8325	0.0601802				ENSG00000163517	ENSMUSG00000034245	0.0398	0.7085	0.056175
ENSG00000167085	ENSMUSG00000038845	0.0017	0.4479	0.00379549				ENSMUSG00000020015	ENSG00000059758	0.0063	0.4341	0.0145128				ENSG00000163931	ENSMUSG00000021957	0.0265	0.8431	0.0314316				ENSG00000067829	ENSMUSG00000002010	0.0252	0.7095	0.035518
ENSG00000004864	ENSMUSG00000015112	0.0228	0.448	0.0508929				ENSMUSG00000027255	ENSG00000149182	0.0363	0.4342	0.083602				ENSG00000213366	ENSMUSG00000058135	0.1363	0.8457	0.161168				ENSG00000185774	ENSMUSG00000029088	0.0741	0.7101	0.104351
ENSG00000166501	ENSMUSG00000052889	0.0054	0.4495	0.0120133				ENSMUSG00000000560	ENSG00000151834	0.0114	0.4344	0.0262431				ENSG00000117115	ENSMUSG00000028927	0.0347	0.8459	0.0410214				ENSG00000007047	ENSMUSG00000030397	0.0506	0.7135	0.070918
ENSG00000138190	ENSMUSG00000053799	0.0354	0.4502	0.0786317				ENSMUSG00000026179	ENSG00000127838	0.0192	0.4354	0.0440974				ENSG00000132702	ENSMUSG00000004894	0.0411	0.8487	0.048427				ENSG00000144647	ENSMUSG00000066235	0.0302	0.7156	0.0422023
ENSG00000140740	ENSMUSG00000030884	0.077	0.4502	0.171035				ENSMUSG00000034593	ENSG00000197535	0.0148	0.4356	0.0339761				ENSG00000167378	ENSMUSG00000041037	0.109	0.8487	0.128432				ENSG00000161682	ENSMUSG00000034685	0.0256	0.7157	0.0357692
ENSG00000110955	ENSMUSG00000025393	0.0195	0.4505	0.0432852				ENSMUSG00000020611	ENSG00000120063	0.017	0.4358	0.0390087				ENSG00000171224	ENSMUSG00000020083	0.0366	0.857	0.0427071				ENSG00000106078	ENSMUSG00000020173	0.2314	0.7176	0.322464
ENSG00000132912	ENSMUSG00000024603	0.0156	0.4506	0.0346205				ENSMUSG00000028782	ENSG00000121753	0.0175	0.4358	0.040156				ENSG00000103197	ENSMUSG00000002496	0.0467	0.8606	0.0542645				ENSG00000108669	ENSMUSG00000017132	0.0068	0.7229	0.00940656
ENSG00000182901	ENSMUSG00000026527	0.0079	0.4508	0.0175244				ENSMUSG00000022354	ENSG00000147684	0.0802	0.4361	0.183903				ENSG00000143727	ENSMUSG00000044573	0.1248	0.8613	0.144897				ENSG00000148408	ENSMUSG00000004113	0.0336	0.7256	0.0463065
ENSG00000103316	ENSMUSG00000030905	0.0634	0.4512	0.140514				ENSMUSG00000031402	ENSG00000130830	0.0381	0.4365	0.0872852				ENSG00000079435	ENSMUSG00000003123	0.0941	0.8634	0.108988				ENSG00000122547	ENSMUSG00000036611	0.0502	0.726	0.069146
ENSG00000020129	ENSMUSG00000028833	0.0091	0.4514	0.0201595				ENSMUSG00000020170	ENSG00000166225	0.0216	0.4369	0.0494392				ENSG00000160211	ENSMUSG00000031400	0.0296	0.864	0.0342593				ENSG00000117118	ENSMUSG00000009863	0.047	0.7292	0.0644542
ENSG00000168036	ENSMUSG00000006932	0.0006	0.4516	0.00132861				ENSMUSG00000032120	ENSG00000172375	0.0469	0.4369	0.107347				ENSG00000213366	ENSMUSG00000004038	0.1395	0.8655	0.161179				ENSG00000149575	ENSMUSG00000070304	0.0378	0.7327	0.05159
ENSG00000174437	ENSMUSG00000029467	0.0055	0.452	0.0121681				ENSMUSG00000040147	ENSG00000069535	0.0575	0.4372	0.131519				ENSG00000111275	ENSMUSG00000029455	0.0255	0.8733	0.0291996				ENSG00000137766	ENSMUSG00000062151	0.0528	0.7339	0.0719444
ENSG00000164061	ENSMUSG00000032589	0.0559	0.452	0.123673				ENSMUSG00000033392	ENSG00000163539	0.019	0.438	0.043379				ENSG00000104946	ENSMUSG00000038520	0.0536	0.8749	0.0612641				ENSG00000171488	ENSMUSG00000054720	0.0147	0.7345	0.0200136
ENSG00000087460	ENSMUSG00000027523	0.2024	0.452	0.447788				ENSMUSG00000028649	ENSG00000127603	0.1143	0.4386	0.260602				ENSG00000100994	ENSMUSG00000033059	0.0203	0.8789	0.0230971				ENSG00000196072	ENSMUSG00000025201	0.0251	0.7346	0.0341683
ENSG00000117528	ENSMUSG00000028127	0.023	0.4522	0.0508625				ENSMUSG00000050379	ENSG00000125354	0.0187	0.439	0.0425968				ENSG00000055332	ENSMUSG00000024079	0.3148	0.8795	0.357931				ENSG00000187688	ENSMUSG00000018507	0.1113	0.7394	0.150527
ENSG00000159023	ENSMUSG00000028906	0.045	0.4525	0.0994475				ENSMUSG00000032383	ENSG00000166794	0.0294	0.439	0.0669704				ENSG00000185359	ENSMUSG00000025793	0.0344	0.8852	0.0388613				ENSG00000179841	ENSMUSG00000021057	0.254	0.7406	0.342965
ENSG00000119471	ENSMUSG00000028383	0.0697	0.453	0.153863				ENSMUSG00000028678	ENSG00000142945	0.0642	0.4395	0.146075				ENSG00000014216	ENSMUSG00000024942	0.0522	0.8853	0.0589631				ENSG00000149091	ENSMUSG00000040479	0.0457	0.7437	0.0614495
ENSG00000111237	ENSMUSG00000029462	0.0028	0.4533	0.00617692				ENSMUSG00000025967	ENSG00000114942	0.0293	0.44	0.0665909				ENSG00000100033	ENSMUSG00000003526	0.0973	0.8868	0.10972				ENSG00000188803	ENSMUSG00000053930	0.0497	0.7442	0.0667831
ENSG00000074054	ENSMUSG00000064302	0.0099	0.4533	0.0218398				ENSMUSG00000002741	ENSG00000106636	0.0354	0.4404	0.0803815				ENSG00000123143	ENSMUSG00000057672	0.0434	0.8869	0.0489345				ENSG00000111696	ENSMUSG00000054027	0.038	0.745	0.0510067
ENSG00000180834	ENSMUSG00000041205	0.1478	0.4536	0.325838				ENSMUSG00000027002	ENSG00000061676	0.0028	0.4409	0.00635065				ENSG00000148834	ENSMUSG00000025068	0.1754	0.8878	0.197567				ENSG00000151148	ENSMUSG00000029577	0.0395	0.7467	0.0528994
ENSG00000084754	ENSMUSG00000025745	0.0772	0.4537	0.170156				ENSMUSG00000024077	ENSG00000115808	0.0161	0.4409	0.0365162				ENSG00000127445	ENSMUSG00000032171	0.0232	0.8882	0.0261202				ENSG00000069712	ENSMUSG00000044060	0.2828	0.7575	0.373333
ENSG00000138107	ENSMUSG00000025228	0	0.454	0				ENSMUSG00000021684	ENSG00000113231	0.0205	0.4411	0.0464747				ENSG00000187091	ENSMUSG00000010660	0.0486	0.894	0.0543624				ENSG00000159788	ENSMUSG00000029101	0.0808	0.7595	0.106386
ENSG00000164076	ENSMUSG00000032936	0.025	0.4544	0.0550176				ENSMUSG00000040389	ENSG00000085433	0.023	0.4412	0.0521306				ENSG00000095321	ENSMUSG00000026853	0.0459	0.9014	0.0509208				ENSG00000157103	ENSMUSG00000030310	0.0093	0.7661	0.0121394
ENSG00000062485	ENSMUSG00000005683	0.0316	0.4544	0.0695423				ENSMUSG00000024302	ENSG00000134769	0.0164	0.4414	0.0371545				ENSG00000171840	ENSMUSG00000041377	0.1589	0.9018	0.176203				ENSG00000124159	ENSMUSG00000016995	0.0485	0.7724	0.0627913
ENSG00000058404	ENSMUSG00000057897	0.0064	0.4547	0.0140752				ENSMUSG00000022551	ENSG00000179091	0.0525	0.4416	0.118886				ENSG00000130827	ENSMUSG00000031398	0.0282	0.907	0.0310915				ENSG00000170989	ENSMUSG00000045092	0.0273	0.775	0.0352258
ENSG00000123983	ENSMUSG00000032883	0.0362	0.4565	0.079299				ENSMUSG00000022337	ENSG00000104412	0.0118	0.4419	0.0267029				ENSG00000180900	ENSMUSG00000022568	0.0661	0.9091	0.0727093				ENSG00000165757	ENSMUSG00000033960	0.3317	0.7751	0.427945
ENSG00000012822	ENSMUSG00000023055	0.0561	0.4568	0.122811				ENSMUSG00000025410	ENSG00000175203	0.0204	0.442	0.0461538				ENSG00000160211	ENSMUSG00000089992	0.0638	0.9123	0.0699331				ENSG00000134780	ENSMUSG00000035735	0.0127	0.7828	0.0162238
ENSG00000197283	ENSMUSG00000067629	0.0111	0.4581	0.0242305				ENSMUSG00000027624	ENSG00000088367	0.0218	0.4422	0.049299				ENSG00000116791	ENSMUSG00000028199	0.1114	0.9239	0.120576				ENSG00000116039	ENSMUSG00000006269	0.0316	0.7838	0.0403164
ENSG00000170390	ENSMUSG00000028078	0.0299	0.4582	0.0652553				ENSMUSG00000019809	ENSG00000034693	0.0293	0.4424	0.0662297				ENSG00000167363	ENSMUSG00000025175	0.0658	0.9293	0.070806				ENSG00000106638	ENSMUSG00000005374	0.0594	0.7897	0.0752184
ENSG00000086061	ENSMUSG00000028410	0.0022	0.4583	0.00480035				ENSMUSG00000032366	ENSG00000140416	0.0955	0.4424	0.215868				ENSG00000161714	ENSMUSG00000020937	0.059	0.9294	0.0634818				ENSG00000141837	ENSMUSG00000034656	0.0474	0.7899	0.0600076
ENSG00000166986	ENSMUSG00000040354	0.0587	0.4592	0.127831				ENSMUSG00000041133	ENSG00000072501	0.0007	0.4427	0.00158121				ENSG00000106211	ENSMUSG00000004951	0.0803	0.9334	0.0860296				ENSG00000162738	ENSMUSG00000026556	0.0025	0.7899	0.00316496
ENSG00000132294	ENSMUSG00000015002	0.0132	0.4593	0.0287394				ENSMUSG00000042807	ENSG00000138411	0.0241	0.4432	0.0543773				ENSG00000160209	ENSMUSG00000032788	0.07	0.9384	0.0745951				ENSG00000130559	ENSMUSG00000026933	0.0842	0.7915	0.10638
ENSG00000105245	ENSMUSG00000063160	0.0222	0.4593	0.0483344				ENSMUSG00000030286	ENSG00000125037	0.0018	0.4433	0.00406046				ENSG00000165752	ENSMUSG00000015981	0.0423	0.9443	0.0447951				ENSG00000165959	ENSMUSG00000021097	0.1807	0.7918	0.228214
ENSG00000180979	ENSMUSG00000027286	0.0226	0.4594	0.0491946				ENSMUSG00000043004	ENSG00000186469	0	0.444	0				ENSG00000205531	ENSMUSG00000059119	0.0246	0.9462	0.0259987				ENSG00000090971	ENSMUSG00000035285	0.0245	0.7955	0.0307982
ENSG00000157827	ENSMUSG00000036053	0.0346	0.4596	0.0752829				ENSMUSG00000020952	ENSG00000092108	0.0175	0.4441	0.0394055				ENSG00000135709	ENSMUSG00000031824	0.0503	0.9539	0.0527309				ENSG00000141543	ENSMUSG00000060782	0.0144	0.797	0.0180678
ENSG00000114520	ENSMUSG00000022808	0.0322	0.46	0.07				ENSMUSG00000020333	ENSG00000164398	0.0585	0.4443	0.131668				ENSG00000104419	ENSMUSG00000005125	0.0282	0.96	0.029375				ENSG00000099904	ENSMUSG00000060166	0.0415	0.7986	0.0519659
ENSG00000198171	ENSMUSG00000068290	0.0933	0.4605	0.202606				ENSMUSG00000074305	ENSG00000173517	0.0735	0.4451	0.165131				ENSG00000124126	ENSMUSG00000039621	0.0404	0.9659	0.0418263				ENSG00000131148	ENSMUSG00000031819	0.0322	0.8012	0.0401897
ENSG00000112851	ENSMUSG00000021709	0.0504	0.4606	0.109422				ENSMUSG00000035954	ENSG00000128512	0.0075	0.4453	0.0168426				ENSG00000108064	ENSMUSG00000003923	0.2531	0.9679	0.261494				ENSG00000136156	ENSMUSG00000022108	0.0217	0.8014	0.0270776
ENSG00000151025	ENSMUSG00000045967	0.0687	0.4607	0.149121				ENSMUSG00000020640	ENSG00000198399	0.033	0.4453	0.0741073				ENSG00000211899	ENSMUSG00000076617	0.2497	0.9696	0.257529				ENSG00000137825	ENSMUSG00000027296	0.0371	0.8021	0.0462536
ENSG00000162616	ENSMUSG00000028035	0.0285	0.4608	0.061849				ENSMUSG00000014606	ENSG00000108528	0.0165	0.4454	0.0370454				ENSG00000125730	ENSMUSG00000024164	0.1335	0.972	0.137346				ENSG00000089250	ENSMUSG00000029361	0.0295	0.806	0.0366005
ENSG00000137100	ENSMUSG00000028447	0.031	0.4614	0.0671868				ENSMUSG00000036712	ENSG00000083799	0.0245	0.4456	0.054982				ENSG00000133313	ENSMUSG00000024644	0.0449	1.0031	0.0447612				ENSG00000144559	ENSMUSG00000030316	0.1255	0.8077	0.155379
ENSG00000176148	ENSMUSG00000027175	0.0822	0.4615	0.178115				ENSMUSG00000007653	ENSG00000145864	0.001	0.4457	0.00224366				ENSG00000131016	ENSMUSG00000038587	0.3012	1.0045	0.299851				ENSG00000054793	ENSMUSG00000027546	0.0088	0.8081	0.0108897
ENSG00000104067	ENSMUSG00000030516	0.0465	0.4619	0.100671				ENSMUSG00000022450	ENSG00000184983	0.0855	0.4458	0.19179				ENSG00000130764	ENSMUSG00000029028	0.0678	1.0048	0.0674761				ENSG00000164929	ENSMUSG00000022296	0.2638	0.8112	0.325197
ENSG00000173166	ENSMUSG00000026014	0.0502	0.4627	0.108494				ENSMUSG00000004069	ENSG00000103423	0.0704	0.4459	0.157883				ENSG00000203485	ENSMUSG00000037679	0.1279	1.0263	0.124622				ENSG00000147509	ENSMUSG00000002459	0.2541	0.8122	0.312854
ENSG00000082898	ENSMUSG00000020290	0.0091	0.4631	0.0196502				ENSMUSG00000033720	ENSG00000144040	0.0155	0.4461	0.0347456				ENSG00000103202	ENSMUSG00000024177	0.0872	1.0328	0.0844307				ENSG00000139174	ENSMUSG00000036158	0.0342	0.8131	0.0420612
ENSG00000172260	ENSMUSG00000040037	0.0249	0.4634	0.0537333				ENSMUSG00000041236	ENSG00000006715	0.0122	0.4462	0.027342				ENSG00000167037	ENSMUSG00000042216	0.0276	1.0363	0.0266332				ENSG00000181467	ENSMUSG00000036894	0	0.8131	0
ENSG00000091129	ENSMUSG00000020598	0.0354	0.4634	0.0763919				ENSMUSG00000025794	ENSG00000188846	0.0773	0.4462	0.173241				ENSG00000142347	ENSMUSG00000024300	0.03	1.0404	0.0288351				ENSG00000102119	ENSMUSG00000001964	0.1396	0.8184	0.170577
ENSG00000083312	ENSMUSG00000009470	0.0016	0.4638	0.00344976				ENSMUSG00000020580	ENSG00000134318	0.0159	0.4467	0.0355944				ENSG00000159189	ENSMUSG00000036896	0.1503	1.0613	0.141619				ENSG00000100364	ENSMUSG00000036046	0.052	0.8308	0.0625903
ENSG00000135924	ENSMUSG00000026203	0.0687	0.4639	0.148092				ENSMUSG00000062257	ENSG00000183715	0.0346	0.4475	0.0773184				ENSG00000179604	ENSMUSG00000041598	0.1522	1.064	0.143045				ENSG00000099800	ENSMUSG00000020219	0.0252	0.8409	0.0299679
ENSG00000130985	ENSMUSG00000001924	0.0228	0.4641	0.0491273				ENSMUSG00000079426	ENSG00000241553	0	0.4478	0				ENSG00000186111	ENSMUSG00000034902	0.0307	1.0714	0.0286541				ENSG00000090975	ENSMUSG00000029406	0.0463	0.8495	0.0545026
ENSG00000187164	ENSMUSG00000041362	0.0455	0.4643	0.097997				ENSMUSG00000024462	ENSG00000204681	0.0057	0.4478	0.0127289				ENSG00000169710	ENSMUSG00000025153	0.1023	1.0734	0.0953046				ENSG00000100427	ENSMUSG00000035805	0.0588	0.8511	0.0690871
ENSG00000204427	ENSMUSG00000007036	0.0193	0.4644	0.041559				ENSMUSG00000038845	ENSG00000167085	0.0017	0.4479	0.00379549				ENSG00000110090	ENSMUSG00000024900	0.0684	1.0786	0.0634155				ENSG00000141543	ENSMUSG00000063692	0.0122	0.8532	0.0142991
ENSG00000214338	ENSMUSG00000038916	0.0454	0.4644	0.0977606				ENSMUSG00000015112	ENSG00000004864	0.0228	0.448	0.0508929				ENSG00000103160	ENSMUSG00000034189	0.0688	1.0883	0.0632179				ENSG00000197380	ENSMUSG00000078794	0.0597	0.8595	0.069459
ENSG00000119321	ENSMUSG00000066151	0.123	0.4645	0.264801				ENSMUSG00000026587	ENSG00000152092	0.0096	0.4484	0.0214095				ENSG00000213366	ENSMUSG00000091561	0.1669	1.0971	0.152128				ENSG00000154096	ENSMUSG00000032011	0.2074	0.8602	0.241107
ENSG00000157823	ENSMUSG00000063801	0	0.4651	0				ENSMUSG00000029861	ENSG00000159784	0.0192	0.4492	0.0427427				ENSG00000172992	ENSMUSG00000020935	0.0431	1.1234	0.0383657				ENSG00000105679	ENSMUSG00000061099	0.1098	0.8671	0.126629
ENSG00000138698	ENSMUSG00000028149	0.0242	0.4654	0.0519983				ENSMUSG00000053799	ENSG00000138190	0.0354	0.4502	0.0786317				ENSG00000197256	ENSMUSG00000032194	0.0889	1.1647	0.0763287				ENSG00000085733	ENSMUSG00000031078	0.0375	0.8682	0.0431928
ENSG00000110171	ENSMUSG00000036989	0.007	0.466	0.0150215				ENSMUSG00000030884	ENSG00000140740	0.077	0.4502	0.171035				ENSG00000160360	ENSMUSG00000026930	0.0358	1.1868	0.0301651				ENSG00000165912	ENSMUSG00000027257	0.0262	0.8731	0.030008
ENSG00000067715	ENSMUSG00000035864	0.0112	0.4661	0.0240292				ENSMUSG00000026904	ENSG00000144290	0.0105	0.4503	0.0233178				ENSG00000072958	ENSMUSG00000003033	0.003	1.189	0.00252313				ENSG00000103154	ENSMUSG00000031837	0.075	0.8762	0.0855969
ENSG00000138685	ENSMUSG00000037225	0.0206	0.4669	0.0441208				ENSMUSG00000025393	ENSG00000110955	0.0195	0.4505	0.0432852				ENSG00000099795	ENSMUSG00000033938	0.096	1.1901	0.0806655				ENSG00000154429	ENSMUSG00000031971	0.1766	0.8773	0.201299
ENSG00000154556	ENSMUSG00000031626	0.0368	0.4678	0.0786661				ENSMUSG00000024603	ENSG00000132912	0.0156	0.4506	0.0346205				ENSG00000176595	ENSMUSG00000055675	0.0981	1.239	0.0791768				ENSG00000171603	ENSMUSG00000039953	0.0433	0.8834	0.0490152
ENSG00000171132	ENSMUSG00000045038	0.0104	0.4679	0.022227				ENSMUSG00000026527	ENSG00000182901	0.0079	0.4508	0.0175244				ENSG00000126934	ENSMUSG00000035027	0.0246	1.2561	0.0195844				ENSG00000075399	ENSMUSG00000001062	0.093	0.8837	0.105239
ENSG00000136051	ENSMUSG00000034560	0.0156	0.4679	0.0333405				ENSMUSG00000028833	ENSG00000020129	0.0091	0.4514	0.0201595				ENSG00000127948	ENSMUSG00000005514	0.0356	1.297	0.027448				ENSG00000040608	ENSMUSG00000043811	0.0622	0.8844	0.0703302
ENSG00000164885	ENSMUSG00000028969	0.0016	0.4681	0.00341807				ENSMUSG00000006932	ENSG00000168036	0.0006	0.4516	0.00132861				ENSG00000065000	ENSMUSG00000020198	0.0442	1.3155	0.0335994				ENSG00000187630	ENSMUSG00000022210	0.1963	0.8955	0.219207
ENSG00000026025	ENSMUSG00000026728	0.0111	0.4681	0.0237129				ENSMUSG00000029467	ENSG00000174437	0.0055	0.452	0.0121681				ENSG00000143774	ENSMUSG00000020444	0.0625	1.4153	0.0441602				ENSG00000128011	ENSMUSG00000030600	0.0207	0.8982	0.0230461
ENSG00000154174	ENSMUSG00000022752	0.0429	0.4694	0.0913933				ENSMUSG00000032589	ENSG00000164061	0.0559	0.452	0.123673				ENSG00000204388	ENSMUSG00000091971	0.0183	1.4379	0.0127269				ENSG00000174672	ENSMUSG00000053046	0.0098	0.899	0.010901
ENSG00000144381	ENSMUSG00000025980	0.0121	0.4699	0.0257502				ENSMUSG00000027523	ENSG00000087460	0.2024	0.452	0.447788				ENSG00000204388	ENSMUSG00000090877	0.0183	1.4565	0.0125644				ENSG00000161671	ENSMUSG00000008140	0.0788	0.9021	0.0873517
ENSG00000166925	ENSMUSG00000029723	0.0862	0.4702	0.183326				ENSMUSG00000028127	ENSG00000117528	0.023	0.4522	0.0508625				ENSG00000196365	ENSMUSG00000041168	0.0621	1.466	0.0423602				ENSG00000161970	ENSMUSG00000059150	0.0412	0.9028	0.0456358
ENSG00000105993	ENSMUSG00000029131	0.089	0.4705	0.18916				ENSMUSG00000028820	ENSG00000116560	0.0364	0.4532	0.0803177				ENSG00000007080	ENSMUSG00000007721	0.0423	1.4903	0.0283835				ENSG00000168298	ENSMUSG00000051627	0.029	0.9049	0.0320477
ENSG00000070961	ENSMUSG00000019943	0.0023	0.4708	0.0048853				ENSMUSG00000029462	ENSG00000111237	0.0028	0.4533	0.00617692				ENSG00000167671	ENSMUSG00000019578	0.1087	1.5206	0.0714849				ENSG00000154118	ENSMUSG00000025318	0.0319	0.9092	0.0350858
ENSG00000145681	ENSMUSG00000021613	0.0181	0.4711	0.0384207				ENSMUSG00000064302	ENSG00000074054	0.0099	0.4533	0.0218398				ENSG00000130193	ENSMUSG00000056665	0.0614	1.5821	0.0388092				ENSG00000123104	ENSMUSG00000030287	0.0205	0.9164	0.0223701
ENSG00000006530	ENSMUSG00000029916	0.0419	0.4711	0.0889408				ENSMUSG00000057378	ENSG00000198838	0.021	0.4535	0.0463065				ENSG00000110047	ENSMUSG00000024772	0.0022	1.6009	0.00137423				ENSG00000076641	ENSMUSG00000027508	0.1093	0.9167	0.119232
ENSG00000168959	ENSMUSG00000049583	0.0179	0.4715	0.0379639				ENSMUSG00000057335	ENSG00000143702	0.0508	0.4536	0.111993				ENSG00000103024	ENSMUSG00000073435	0.0578	1.7278	0.0334529				ENSG00000141543	ENSMUSG00000025580	0.0033	0.9217	0.00358034
ENSG00000215021	ENSMUSG00000004264	0.0005	0.4716	0.00106022				ENSMUSG00000041205	ENSG00000180834	0.1478	0.4536	0.325838				ENSG00000176619	ENSMUSG00000062075	0.0867	2.2395	0.038714				ENSG00000143858	ENSMUSG00000026452	0.0093	0.9239	0.010066
ENSG00000147065	ENSMUSG00000031207	0.006	0.4717	0.0127199				ENSMUSG00000025745	ENSG00000084754	0.0772	0.4537	0.170156				ENSG00000170373	ENSMUSG00000027442	0.9662	3.142	0.307511				ENSG00000162551	ENSMUSG00000028766	0.0569	0.9249	0.0615202
ENSG00000132002	ENSMUSG00000005483	0.0211	0.4718	0.0447223				ENSMUSG00000025228	ENSG00000138107	0	0.454	0				ENSG00000170373	ENSMUSG00000036924	13.4209	11.1545	1.20318				ENSG00000105520	ENSMUSG00000040563	0.0681	0.9269	0.0734707
ENSG00000125971	ENSMUSG00000047459	0.0136	0.472	0.0288136				ENSMUSG00000030075	ENSG00000113805	0.0429	0.4542	0.0944518				ENSG00000085063	ENSMUSG00000068686	0.5046	34.08	0.0148063				ENSG00000184985	ENSMUSG00000029093	0.0968	0.9435	0.102597
ENSG00000090013	ENSMUSG00000040466	0.0389	0.472	0.0824153				ENSMUSG00000034813	ENSG00000155974	0.0188	0.4543	0.0413823												ENSG00000066248	ENSMUSG00000026259	0.0729	0.9538	0.0764311
ENSG00000137343	ENSMUSG00000024426	0.046	0.4724	0.0973751				ENSMUSG00000032936	ENSG00000164076	0.025	0.4544	0.0550176												ENSG00000004139	ENSMUSG00000050132	0.0697	0.9598	0.0726193
ENSG00000122733	ENSMUSG00000036062	0.0501	0.4731	0.105897				ENSMUSG00000005683	ENSG00000062485	0.0316	0.4544	0.0695423												ENSG00000184009	ENSMUSG00000062825	0.001	0.9622	0.00103928
ENSG00000090621	ENSMUSG00000062093	0.0139	0.4737	0.0293435				ENSMUSG00000039530	ENSG00000104723	0.0122	0.4546	0.0268368												ENSG00000116991	ENSMUSG00000001995	0.0419	0.9637	0.0434783
ENSG00000171885	ENSMUSG00000024411	0.0367	0.4737	0.0774752				ENSMUSG00000057897	ENSG00000058404	0.0064	0.4547	0.0140752												ENSG00000140511	ENSMUSG00000030606	0.1096	0.9773	0.112146
ENSG00000150471	ENSMUSG00000037605	0.019	0.4742	0.0400675				ENSMUSG00000045589	ENSG00000136805	0.0409	0.4557	0.089752												ENSG00000104980	ENSMUSG00000002949	0.0521	0.9819	0.0530604
ENSG00000161791	ENSMUSG00000023008	0.0226	0.4743	0.0476492				ENSMUSG00000074785	ENSG00000136040	0.0494	0.456	0.108333												ENSG00000185340	ENSMUSG00000034201	0.0827	0.9828	0.0841473
ENSG00000138674	ENSMUSG00000035325	0.0432	0.4748	0.0909857				ENSMUSG00000073557	ENSG00000077157	0.0628	0.4561	0.137689												ENSG00000096433	ENSMUSG00000042644	0.0208	0.9861	0.0210932
ENSG00000116106	ENSMUSG00000026235	0.0069	0.4754	0.0145141				ENSMUSG00000032883	ENSG00000123983	0.0362	0.4565	0.079299												ENSG00000161970	ENSMUSG00000063754	0.0065	0.9896	0.00656831
ENSG00000125868	ENSMUSG00000015932	0.0188	0.4755	0.0395373				ENSMUSG00000023055	ENSG00000012822	0.0561	0.4568	0.122811												ENSG00000138311	ENSMUSG00000037855	0.2516	0.996	0.25261
ENSG00000182389	ENSMUSG00000017412	0.008	0.4756	0.0168209				ENSMUSG00000055782	ENSG00000173208	0.0302	0.4578	0.0659677												ENSG00000158445	ENSMUSG00000050556	0.0293	1.0026	0.029224
ENSG00000152556	ENSMUSG00000033065	0.0103	0.4757	0.0216523				ENSMUSG00000067629	ENSG00000197283	0.0111	0.4581	0.0242305												ENSG00000158792	ENSMUSG00000033594	0.0849	1.0277	0.0826117
ENSG00000141503	ENSMUSG00000020827	0.0118	0.476	0.0247899				ENSMUSG00000028078	ENSG00000170390	0.0299	0.4582	0.0652553												ENSG00000135916	ENSMUSG00000026223	0.0291	1.0311	0.0282223
ENSG00000175198	ENSMUSG00000041650	0.0574	0.4767	0.120411				ENSMUSG00000028410	ENSG00000086061	0.0022	0.4583	0.00480035												ENSG00000170889	ENSMUSG00000006333	0	1.0328	0
ENSG00000135821	ENSMUSG00000026473	0.0267	0.4769	0.0559866				ENSMUSG00000015002	ENSG00000132294	0.0132	0.4593	0.0287394												ENSG00000172247	ENSMUSG00000040794	0.021	1.039	0.0202117
ENSG00000115944	ENSMUSG00000068537	0.1855	0.4771	0.388807				ENSMUSG00000063160	ENSG00000105245	0.0222	0.4593	0.0483344												ENSG00000117245	ENSMUSG00000028758	0.1058	1.0469	0.10106
ENSG00000077549	ENSMUSG00000028745	0.0497	0.4775	0.104084				ENSMUSG00000027286	ENSG00000180979	0.0226	0.4594	0.0491946												ENSG00000143740	ENSMUSG00000009894	0.1995	1.0484	0.19029
ENSG00000215305	ENSMUSG00000027411	0.0154	0.4777	0.0322378				ENSMUSG00000036053	ENSG00000157827	0.0346	0.4596	0.0752829												ENSG00000124831	ENSMUSG00000026305	0.3234	1.0524	0.307298
ENSG00000154229	ENSMUSG00000050965	0.0027	0.4785	0.00564263				ENSMUSG00000021709	ENSG00000112851	0.0504	0.4606	0.109422												ENSG00000185989	ENSMUSG00000031453	0.0226	1.0637	0.0212466
ENSG00000105926	ENSMUSG00000038388	0.0077	0.4788	0.0160819				ENSMUSG00000045967	ENSG00000151025	0.0687	0.4607	0.149121												ENSG00000175274	ENSMUSG00000068735	0.0414	1.071	0.0386555
ENSG00000166963	ENSMUSG00000027254	0.1106	0.4788	0.230994				ENSMUSG00000028035	ENSG00000162616	0.0285	0.4608	0.061849												ENSG00000197530	ENSMUSG00000029060	0.0377	1.0822	0.0348364
ENSG00000136267	ENSMUSG00000036095	0.0155	0.479	0.0323591				ENSMUSG00000018470	ENSG00000170049	0.0345	0.4611	0.0748211												ENSG00000196358	ENSMUSG00000035513	0.0256	1.096	0.0233577
ENSG00000160469	ENSMUSG00000035390	0.004	0.4793	0.0083455				ENSMUSG00000028447	ENSG00000137100	0.031	0.4614	0.0671868												ENSG00000188191	ENSMUSG00000025855	0.0274	1.0984	0.0249454
ENSG00000131100	ENSMUSG00000019210	0.0061	0.4794	0.0127242				ENSMUSG00000024983	ENSG00000151532	0.0235	0.4617	0.0508989												ENSG00000157911	ENSMUSG00000029047	0.1056	1.1063	0.0954533
ENSG00000135624	ENSMUSG00000030007	0.0219	0.4797	0.0456535				ENSMUSG00000030516	ENSG00000104067	0.0465	0.4619	0.100671												ENSG00000187664	ENSMUSG00000007594	0.0456	1.1147	0.0409079
ENSG00000149273	ENSMUSG00000030744	0.0019	0.4799	0.00395916				ENSMUSG00000041444	ENSG00000134909	0.0672	0.4619	0.145486												ENSG00000171700	ENSMUSG00000002458	0.0405	1.1504	0.0352051
ENSG00000007402	ENSMUSG00000010066	0.0155	0.4799	0.0322984				ENSMUSG00000007411	ENSG00000075413	0.0149	0.462	0.0322511												ENSG00000116663	ENSMUSG00000055401	0.1966	1.1544	0.170305
ENSG00000151239	ENSMUSG00000022451	0.0256	0.48	0.0533333				ENSMUSG00000021248	ENSG00000170348	0.0335	0.4625	0.0724324												ENSG00000105088	ENSMUSG00000032172	0.0277	1.1615	0.0238485
ENSG00000101333	ENSMUSG00000039943	0.0221	0.4806	0.0459842				ENSMUSG00000026014	ENSG00000173166	0.0502	0.4627	0.108494												ENSG00000161970	ENSMUSG00000060938	0	1.1622	0
ENSG00000135318	ENSMUSG00000032420	0.0752	0.4812	0.156276				ENSMUSG00000052428	ENSG00000143183	0	0.4633	0												ENSG00000099308	ENSMUSG00000031833	0.0552	1.1683	0.0472481
ENSG00000156642	ENSMUSG00000032336	0.0968	0.4823	0.200705				ENSMUSG00000040037	ENSG00000172260	0.0249	0.4634	0.0537333												ENSG00000073150	ENSMUSG00000058441	0.0321	1.1734	0.0273564
ENSG00000005810	ENSMUSG00000033004	0.0131	0.4827	0.027139				ENSMUSG00000020598	ENSG00000091129	0.0354	0.4634	0.0763919												ENSG00000184992	ENSMUSG00000037905	0.1016	1.1931	0.0851563
ENSG00000167792	ENSMUSG00000037916	0.0195	0.4828	0.0403894				ENSMUSG00000001924	ENSG00000130985	0.0228	0.4641	0.0491273												ENSG00000125912	ENSMUSG00000020238	0.0321	1.2	0.02675
ENSG00000113657	ENSMUSG00000024501	0.0072	0.483	0.0149068				ENSMUSG00000007036	ENSG00000204427	0.0193	0.4644	0.041559												ENSG00000197177	ENSMUSG00000025475	0.0905	1.2028	0.0752411
ENSG00000066084	ENSMUSG00000023026	0.0099	0.4831	0.0204927				ENSMUSG00000038916	ENSG00000255330	0.0454	0.4644	0.0977606												ENSG00000061337	ENSMUSG00000036306	0.0466	1.205	0.0386722
ENSG00000004660	ENSMUSG00000020785	0.0317	0.4835	0.0655636				ENSMUSG00000038916	ENSG00000214338	0.0454	0.4644	0.0977606												ENSG00000051128	ENSMUSG00000003573	0.0564	1.2201	0.0462257
ENSG00000074696	ENSMUSG00000033629	0.0415	0.4835	0.0858325				ENSMUSG00000029153	ENSG00000145247	0.0783	0.4644	0.168605												ENSG00000152969	ENSMUSG00000063646	0.0349	1.2232	0.0285317
ENSG00000136143	ENSMUSG00000022110	0.0458	0.4842	0.094589				ENSMUSG00000063801	ENSG00000157823	0	0.4651	0												ENSG00000130813	ENSMUSG00000038884	0.0208	1.2248	0.0169824
ENSG00000138246	ENSMUSG00000032560	0.0159	0.4846	0.0328106				ENSMUSG00000028149	ENSG00000138698	0.0242	0.4654	0.0519983												ENSG00000176108	ENSMUSG00000025371	0.0306	1.2719	0.0240585
ENSG00000168291	ENSMUSG00000021748	0.0313	0.4852	0.0645095				ENSMUSG00000036989	ENSG00000110171	0.007	0.466	0.0150215												ENSG00000164114	ENSMUSG00000033900	0.209	1.304	0.160276
ENSG00000176658	ENSMUSG00000035441	0.0108	0.4856	0.0222405				ENSMUSG00000035864	ENSG00000067715	0.0112	0.4661	0.0240292												ENSG00000142408	ENSMUSG00000053395	0.013	1.3586	0.00956867
ENSG00000183775	ENSMUSG00000051401	0.017	0.486	0.0349794				ENSMUSG00000021704	ENSG00000177034	0.0536	0.4673	0.114701												ENSG00000099822	ENSMUSG00000020331	0.0276	1.3785	0.0200218
ENSG00000023734	ENSMUSG00000030224	0.0105	0.4861	0.0216005				ENSMUSG00000042492	ENSG00000169221	0.0517	0.4677	0.110541												ENSG00000118898	ENSMUSG00000039457	0.0625	1.3948	0.0448093
ENSG00000117868	ENSMUSG00000021171	0.039	0.487	0.0800821				ENSMUSG00000009647	ENSG00000156026	0.0196	0.4678	0.0418982												ENSG00000174775	ENSMUSG00000025499	0	1.4086	0
ENSG00000140992	ENSMUSG00000024122	0.0244	0.4876	0.050041				ENSMUSG00000031626	ENSG00000154556	0.0368	0.4678	0.0786661												ENSG00000119242	ENSMUSG00000037979	0.068	1.5494	0.043888
ENSG00000124164	ENSMUSG00000054455	0.0488	0.4876	0.100082				ENSMUSG00000045038	ENSG00000171132	0.0104	0.4679	0.022227												ENSG00000125741	ENSMUSG00000052214	0.1685	1.7863	0.0943291
ENSG00000000419	ENSMUSG00000078919	0.0536	0.4881	0.109814				ENSMUSG00000028969	ENSG00000164885	0.0016	0.4681	0.00341807												ENSG00000124575	ENSMUSG00000052565	0.0729	1.8636	0.0391178
ENSG00000149925	ENSMUSG00000063129	0.0371	0.4886	0.0759312				ENSMUSG00000026728	ENSG00000026025	0.0111	0.4681	0.0237129												ENSG00000177733	ENSMUSG00000007836	0.0322	1.9088	0.0168692
ENSG00000170248	ENSMUSG00000032504	0.0271	0.4888	0.0554419				ENSMUSG00000031059	ENSG00000147123	0.1345	0.4682	0.28727												ENSG00000142444	ENSMUSG00000048429	0.0959	2.1873	0.043844
ENSG00000100201	ENSMUSG00000055065	0.0057	0.4889	0.0116588				ENSMUSG00000004110	ENSG00000198216	0.0156	0.4688	0.0332765												ENSG00000141933	ENSMUSG00000020308	0.0736	2.203	0.033409
ENSG00000008086	ENSMUSG00000031292	0.0208	0.4894	0.042501				ENSMUSG00000040022	ENSG00000107560	0.0413	0.4692	0.0880222												ENSG00000198576	ENSMUSG00000022602	0.0324	2.2847	0.0141813
ENSG00000078018	ENSMUSG00000015222	0.0406	0.4898	0.082891				ENSMUSG00000022752	ENSG00000154174	0.0429	0.4694	0.0913933												ENSG00000176022	ENSMUSG00000050796	0.0793	2.3042	0.0344154
ENSG00000181013	ENSMUSG00000090107	0.3441	0.4898	0.702532				ENSMUSG00000025980	ENSG00000144381	0.0121	0.4699	0.0257502												ENSG00000187837	ENSMUSG00000036181	0.061	2.3826	0.0256023
ENSG00000116161	ENSMUSG00000014226	0.0305	0.4899	0.0622576				ENSMUSG00000029131	ENSG00000105993	0.089	0.4705	0.18916												ENSG00000129951	ENSMUSG00000035835	0.0523	2.477	0.0211143
ENSG00000064042	ENSMUSG00000037736	0.0685	0.4899	0.139824				ENSMUSG00000026335	ENSG00000145730	0.0475	0.4706	0.100935												ENSG00000115268	ENSMUSG00000063457	0.0028	2.8141	0.00099499
ENSG00000104093	ENSMUSG00000041268	0.0368	0.49	0.075102				ENSMUSG00000019943	ENSG00000070961	0.0023	0.4708	0.0048853												ENSG00000115268	ENSMUSG00000090538	0.0664	3.4555	0.0192157
ENSG00000115365	ENSMUSG00000026000	0.0442	0.4901	0.0901857				ENSMUSG00000031673	ENSG00000140937	0.0126	0.4711	0.0267459												ENSG00000130479	ENSMUSG00000019261	0.1929	4.4571	0.0432793
ENSG00000148943	ENSMUSG00000027162	0	0.4904	0				ENSMUSG00000021613	ENSG00000145681	0.0181	0.4711	0.0384207												ENSG00000184357	ENSMUSG00000058773	0.0421	6.1729	0.00682013
ENSG00000167578	ENSMUSG00000053291	0.0042	0.4904	0.00856444				ENSMUSG00000029916	ENSG00000006530	0.0419	0.4711	0.0889408												ENSG00000184357	ENSMUSG00000091230	0.1728	7.0301	0.02458
ENSG00000105197	ENSMUSG00000003438	0.0421	0.4904	0.0858483				ENSMUSG00000049583	ENSG00000168959	0.0179	0.4715	0.0379639												ENSG00000178695	ENSMUSG00000041633	0.2745	26.69	0.0102848
ENSG00000144566	ENSMUSG00000017831	0.0083	0.4923	0.0168596				ENSMUSG00000004264	ENSG00000215021	0.0005	0.4716	0.00106022
ENSG00000129562	ENSMUSG00000022174	0	0.4926	0				ENSMUSG00000031207	ENSG00000147065	0.006	0.4717	0.0127199
ENSG00000153956	ENSMUSG00000040118	0.0192	0.4929	0.0389531				ENSMUSG00000005483	ENSG00000132002	0.0211	0.4718	0.0447223
ENSG00000079785	ENSMUSG00000037149	0.0118	0.4935	0.0239108				ENSMUSG00000024426	ENSG00000137343	0.046	0.4724	0.0973751
ENSG00000106554	ENSMUSG00000053768	0.0514	0.4943	0.103985				ENSMUSG00000033768	ENSG00000110076	0.0078	0.4736	0.0164696
ENSG00000113013	ENSMUSG00000024359	0.0076	0.4944	0.0153722				ENSMUSG00000024411	ENSG00000171885	0.0367	0.4737	0.0774752
ENSG00000126777	ENSMUSG00000021843	0.0896	0.4946	0.181156				ENSMUSG00000048388	ENSG00000144369	0.0587	0.4741	0.123814
ENSG00000160145	ENSMUSG00000061751	0.0049	0.4947	0.00990499				ENSMUSG00000037605	ENSG00000150471	0.019	0.4742	0.0400675
ENSG00000163468	ENSMUSG00000001416	0.0137	0.4951	0.0276712				ENSMUSG00000023008	ENSG00000161791	0.0226	0.4743	0.0476492
ENSG00000107020	ENSMUSG00000016495	0.0919	0.4952	0.185582				ENSMUSG00000040028	ENSG00000066044	0.0069	0.475	0.0145263
ENSG00000159082	ENSMUSG00000022973	0.0522	0.4954	0.105369				ENSMUSG00000018796	ENSG00000151726	0.0807	0.4753	0.169788
ENSG00000143933	ENSMUSG00000036438	0	0.496	0				ENSMUSG00000026235	ENSG00000116106	0.0069	0.4754	0.0145141
ENSG00000084774	ENSMUSG00000013629	0.0236	0.4962	0.0475615				ENSMUSG00000015932	ENSG00000125868	0.0188	0.4755	0.0395373
ENSG00000136193	ENSMUSG00000019124	0.0618	0.4963	0.124521				ENSMUSG00000017412	ENSG00000182389	0.008	0.4756	0.0168209
ENSG00000127463	ENSMUSG00000078517	0.0337	0.4965	0.0678751				ENSMUSG00000033065	ENSG00000152556	0.0103	0.4757	0.0216523
ENSG00000131462	ENSMUSG00000035198	0.0047	0.4967	0.00946245				ENSMUSG00000040374	ENSG00000164751	0.0652	0.4758	0.137032
ENSG00000047249	ENSMUSG00000033793	0.0065	0.4968	0.0130837				ENSMUSG00000031320	ENSG00000198034	0	0.476	0
ENSG00000136044	ENSMUSG00000020263	0.0399	0.4969	0.0802978				ENSMUSG00000020827	ENSG00000141503	0.0118	0.476	0.0247899
ENSG00000115252	ENSMUSG00000059173	0.038	0.4975	0.0763819				ENSMUSG00000026473	ENSG00000135821	0.0267	0.4769	0.0559866
ENSG00000143847	ENSMUSG00000026458	0.0365	0.498	0.0732932				ENSMUSG00000028745	ENSG00000077549	0.0497	0.4775	0.104084
ENSG00000114391	ENSMUSG00000091285	0.0662	0.4982	0.132878				ENSMUSG00000027411	ENSG00000215305	0.0154	0.4777	0.0322378
ENSG00000138279	ENSMUSG00000021814	0.0394	0.4984	0.079053				ENSMUSG00000029621	ENSG00000241685	0.0074	0.4784	0.0154682
ENSG00000136717	ENSMUSG00000024381	0.02	0.4994	0.0400481				ENSMUSG00000038388	ENSG00000105926	0.0077	0.4788	0.0160819
ENSG00000079841	ENSMUSG00000041670	0.0597	0.4994	0.119543				ENSMUSG00000027254	ENSG00000166963	0.1106	0.4788	0.230994
ENSG00000135655	ENSMUSG00000020124	0.0111	0.4995	0.0222222				ENSMUSG00000036095	ENSG00000136267	0.0155	0.479	0.0323591
ENSG00000114948	ENSMUSG00000025964	0.0481	0.4999	0.0962192				ENSMUSG00000009418	ENSG00000134369	0.0173	0.479	0.0361169
ENSG00000102003	ENSMUSG00000031144	0.0216	0.5	0.0432				ENSMUSG00000035390	ENSG00000160469	0.004	0.4793	0.0083455
ENSG00000060971	ENSMUSG00000010651	0.0789	0.5	0.1578				ENSMUSG00000019210	ENSG00000131100	0.0061	0.4794	0.0127242
ENSG00000137575	ENSMUSG00000028249	0.0504	0.5001	0.10078				ENSMUSG00000030007	ENSG00000135624	0.0219	0.4797	0.0456535
ENSG00000198677	ENSMUSG00000033991	0.0856	0.5002	0.171132				ENSMUSG00000030744	ENSG00000149273	0.0019	0.4799	0.00395916
ENSG00000166913	ENSMUSG00000018326	0.0056	0.5013	0.011171				ENSMUSG00000010066	ENSG00000007402	0.0155	0.4799	0.0322984
ENSG00000153904	ENSMUSG00000028194	0.0317	0.5016	0.0631978				ENSMUSG00000022451	ENSG00000151239	0.0256	0.48	0.0533333
ENSG00000159164	ENSMUSG00000038486	0.0056	0.502	0.0111554				ENSMUSG00000039943	ENSG00000101333	0.0221	0.4806	0.0459842
ENSG00000204843	ENSMUSG00000031865	0.0145	0.502	0.0288845				ENSMUSG00000042766	ENSG00000163462	0.0102	0.4807	0.0212191
ENSG00000064787	ENSMUSG00000013523	0.2772	0.5022	0.551971				ENSMUSG00000000276	ENSG00000153933	0.0456	0.4811	0.0947828
ENSG00000163032	ENSMUSG00000054459	0	0.5023	0				ENSMUSG00000032420	ENSG00000135318	0.0752	0.4812	0.156276
ENSG00000065150	ENSMUSG00000030662	0.0082	0.5029	0.0163054				ENSMUSG00000032336	ENSG00000156642	0.0968	0.4823	0.200705
ENSG00000213672	ENSMUSG00000032598	0.054	0.5029	0.107377				ENSMUSG00000022601	ENSG00000066422	0.0575	0.4825	0.119171
ENSG00000116688	ENSMUSG00000029020	0.0238	0.5035	0.0472691				ENSMUSG00000033004	ENSG00000005810	0.0131	0.4827	0.027139
ENSG00000176956	ENSMUSG00000022577	0.0532	0.5035	0.10566				ENSMUSG00000037916	ENSG00000167792	0.0195	0.4828	0.0403894
ENSG00000136842	ENSMUSG00000028328	0.0143	0.5037	0.0283899				ENSMUSG00000025816	ENSG00000065665	0.0005	0.4829	0.00103541
ENSG00000170759	ENSMUSG00000006740	0.0143	0.5038	0.0283843				ENSMUSG00000024501	ENSG00000113657	0.0072	0.483	0.0149068
ENSG00000112640	ENSMUSG00000059409	0.0136	0.5043	0.0269681				ENSMUSG00000023026	ENSG00000066084	0.0099	0.4831	0.0204927
ENSG00000141252	ENSMUSG00000017288	0.0158	0.5049	0.0312933				ENSMUSG00000033629	ENSG00000074696	0.0415	0.4835	0.0858325
ENSG00000117448	ENSMUSG00000028692	0.0356	0.5052	0.0704671				ENSMUSG00000034613	ENSG00000111110	0.0158	0.4837	0.0326649
ENSG00000160007	ENSMUSG00000058230	0.0109	0.5054	0.0215671				ENSMUSG00000042535	ENSG00000100226	0.0127	0.4842	0.0262288
ENSG00000071967	ENSMUSG00000027015	0.1663	0.5054	0.329046				ENSMUSG00000022110	ENSG00000136143	0.0458	0.4842	0.094589
ENSG00000165629	ENSMUSG00000025781	0.044	0.5055	0.0870425				ENSMUSG00000028760	ENSG00000075151	0.0712	0.4842	0.147047
ENSG00000151835	ENSMUSG00000048279	0.0663	0.5055	0.131157				ENSMUSG00000032560	ENSG00000138246	0.0159	0.4846	0.0328106
ENSG00000112855	ENSMUSG00000019143	0.0912	0.5056	0.18038				ENSMUSG00000021748	ENSG00000168291	0.0313	0.4852	0.0645095
ENSG00000134684	ENSMUSG00000028811	0.0176	0.5058	0.0347964				ENSMUSG00000045348	ENSG00000166924	0.0396	0.4852	0.0816158
ENSG00000203879	ENSMUSG00000015291	0.0092	0.5061	0.0181782				ENSMUSG00000035441	ENSG00000176658	0.0108	0.4856	0.0222405
ENSG00000137106	ENSMUSG00000035637	0.0764	0.5064	0.150869				ENSMUSG00000051401	ENSG00000183775	0.017	0.486	0.0349794
ENSG00000099204	ENSMUSG00000025085	0.052	0.5067	0.102625				ENSMUSG00000059439	ENSG00000141376	0.0151	0.4863	0.0310508
ENSG00000107897	ENSMUSG00000026781	0.1025	0.5087	0.201494				ENSMUSG00000040225	ENSG00000117523	0.0702	0.4869	0.144177
ENSG00000168172	ENSMUSG00000037234	0.0102	0.5088	0.0200472				ENSMUSG00000027406	ENSG00000101365	0.0311	0.4874	0.063808
ENSG00000090863	ENSMUSG00000003316	0.0171	0.509	0.0335953				ENSMUSG00000024122	ENSG00000140992	0.0244	0.4876	0.050041
ENSG00000007237	ENSMUSG00000033066	0.0126	0.5091	0.0247496				ENSMUSG00000054455	ENSG00000124164	0.0488	0.4876	0.100082
ENSG00000155511	ENSMUSG00000020524	0.0056	0.5092	0.0109976				ENSMUSG00000078919	ENSG00000000419	0.0536	0.4881	0.109814
ENSG00000142235	ENSMUSG00000062044	0.0507	0.5098	0.0994508				ENSMUSG00000055065	ENSG00000100201	0.0057	0.4889	0.0116588
ENSG00000150768	ENSMUSG00000000168	0.0823	0.5099	0.161404				ENSMUSG00000031292	ENSG00000008086	0.0208	0.4894	0.042501
ENSG00000151552	ENSMUSG00000015806	0.0319	0.51	0.062549				ENSMUSG00000015222	ENSG00000078018	0.0406	0.4898	0.082891
ENSG00000135046	ENSMUSG00000024659	0.0626	0.5101	0.122721				ENSMUSG00000041268	ENSG00000104093	0.0368	0.49	0.075102
ENSG00000066032	ENSMUSG00000063063	0.0005	0.5102	0.000980008				ENSMUSG00000026000	ENSG00000115365	0.0442	0.4901	0.0901857
ENSG00000171914	ENSMUSG00000052698	0.0062	0.5102	0.0121521				ENSMUSG00000027162	ENSG00000148943	0	0.4904	0
ENSG00000058272	ENSMUSG00000019907	0.0429	0.5106	0.0840188				ENSMUSG00000027799	ENSG00000172915	0.0125	0.4914	0.0254375
ENSG00000197959	ENSMUSG00000040265	0.0099	0.5111	0.01937				ENSMUSG00000026074	ENSG00000071054	0.0072	0.4916	0.0146461
ENSG00000073417	ENSMUSG00000025584	0.1218	0.5117	0.23803				ENSMUSG00000017831	ENSG00000144566	0.0083	0.4923	0.0168596
ENSG00000158856	ENSMUSG00000022099	0.0202	0.5122	0.0394377				ENSMUSG00000022174	ENSG00000129562	0	0.4926	0
ENSG00000197386	ENSMUSG00000029104	0.049	0.5122	0.0956658				ENSMUSG00000037149	ENSG00000079785	0.0118	0.4935	0.0239108
ENSG00000080493	ENSMUSG00000060961	0.0154	0.5123	0.0300605				ENSMUSG00000041624	ENSG00000152402	0.0501	0.4942	0.101376
ENSG00000145349	ENSMUSG00000053819	0.0088	0.5124	0.0171741				ENSMUSG00000053768	ENSG00000106554	0.0514	0.4943	0.103985
ENSG00000109158	ENSMUSG00000029211	0.0479	0.5126	0.0934452				ENSMUSG00000024359	ENSG00000113013	0.0076	0.4944	0.0153722
ENSG00000131558	ENSMUSG00000029763	0.02	0.5129	0.038994				ENSMUSG00000021843	ENSG00000126777	0.0896	0.4946	0.181156
ENSG00000211455	ENSMUSG00000001630	0.0111	0.514	0.0215953				ENSMUSG00000061751	ENSG00000160145	0.0049	0.4947	0.00990499
ENSG00000155097	ENSMUSG00000022295	0.0089	0.5141	0.0173118				ENSMUSG00000001416	ENSG00000163468	0.0137	0.4951	0.0276712
ENSG00000164070	ENSMUSG00000025757	0.0382	0.5143	0.0742757				ENSMUSG00000022973	ENSG00000159082	0.0522	0.4954	0.105369
ENSG00000060971	ENSMUSG00000036138	0.0832	0.5145	0.16171				ENSMUSG00000036438	ENSG00000143933	0	0.496	0
ENSG00000147416	ENSMUSG00000006273	0.0056	0.5148	0.010878				ENSMUSG00000078517	ENSG00000127463	0.0337	0.4965	0.0678751
ENSG00000125814	ENSMUSG00000027438	0	0.5154	0				ENSMUSG00000033793	ENSG00000047249	0.0065	0.4968	0.0130837
ENSG00000137824	ENSMUSG00000070730	0.0822	0.5157	0.159395				ENSMUSG00000020263	ENSG00000136044	0.0399	0.4969	0.0802978
ENSG00000132153	ENSMUSG00000032480	0.0115	0.516	0.0222868				ENSMUSG00000026458	ENSG00000143847	0.0365	0.498	0.0732932
ENSG00000002549	ENSMUSG00000039682	0.0478	0.5163	0.0925818				ENSMUSG00000038555	ENSG00000132563	0.0331	0.4986	0.0663859
ENSG00000148341	ENSMUSG00000026860	0.0149	0.5166	0.0288424				ENSMUSG00000024381	ENSG00000136717	0.02	0.4994	0.0400481
ENSG00000205726	ENSMUSG00000022957	0.0247	0.5166	0.0478126				ENSMUSG00000041670	ENSG00000079841	0.0597	0.4994	0.119543
ENSG00000169032	ENSMUSG00000004936	0.0046	0.5169	0.00889921				ENSMUSG00000026113	ENSG00000040933	0.0159	0.4998	0.0318127
ENSG00000120053	ENSMUSG00000025190	0.0468	0.5173	0.0904697				ENSMUSG00000025964	ENSG00000114948	0.0481	0.4999	0.0962192
ENSG00000105953	ENSMUSG00000020456	0.0216	0.5175	0.0417391				ENSMUSG00000031144	ENSG00000102003	0.0216	0.5	0.0432
ENSG00000204655	ENSMUSG00000076439	0.0831	0.5175	0.16058				ENSMUSG00000028249	ENSG00000137575	0.0504	0.5001	0.10078
ENSG00000125166	ENSMUSG00000031672	0.025	0.5176	0.0482998				ENSMUSG00000032046	ENSG00000100997	0.0572	0.5006	0.114263
ENSG00000134278	ENSMUSG00000024533	0.0359	0.5176	0.0693586				ENSMUSG00000018326	ENSG00000166913	0.0056	0.5013	0.011171
ENSG00000166411	ENSMUSG00000032279	0.0117	0.5181	0.0225825				ENSMUSG00000028556	ENSG00000116641	0.0084	0.5016	0.0167464
ENSG00000164904	ENSMUSG00000053644	0.064	0.5181	0.123528				ENSMUSG00000028194	ENSG00000153904	0.0317	0.5016	0.0631978
ENSG00000164506	ENSMUSG00000019790	0.0223	0.5182	0.0430336				ENSMUSG00000038486	ENSG00000159164	0.0056	0.502	0.0111554
ENSG00000014123	ENSMUSG00000040359	0.0497	0.5188	0.095798				ENSMUSG00000031865	ENSG00000204843	0.0145	0.502	0.0288845
ENSG00000149930	ENSMUSG00000059981	0.0388	0.519	0.0747592				ENSMUSG00000020828	ENSG00000129219	0.0526	0.502	0.104781
ENSG00000116147	ENSMUSG00000015829	0.0334	0.5191	0.0643421				ENSMUSG00000029016	ENSG00000011021	0.0146	0.5021	0.0290779
ENSG00000155816	ENSMUSG00000028354	0.1126	0.5191	0.216914				ENSMUSG00000013523	ENSG00000064787	0.2772	0.5022	0.551971
ENSG00000213585	ENSMUSG00000020402	0.0065	0.5192	0.0125193				ENSMUSG00000054459	ENSG00000163032	0	0.5023	0
ENSG00000149925	ENSMUSG00000030695	0.0101	0.5192	0.019453				ENSMUSG00000022103	ENSG00000168546	0.0279	0.5026	0.0555113
ENSG00000130396	ENSMUSG00000068036	0.031	0.5195	0.0596728				ENSMUSG00000030662	ENSG00000065150	0.0082	0.5029	0.0163054
ENSG00000133742	ENSMUSG00000027556	0.134	0.5197	0.257841				ENSMUSG00000032598	ENSG00000213672	0.054	0.5029	0.107377
ENSG00000150086	ENSMUSG00000030209	0.0058	0.5199	0.011156				ENSMUSG00000029020	ENSG00000116688	0.0238	0.5035	0.0472691
ENSG00000109654	ENSMUSG00000027993	0.0041	0.5205	0.00787704				ENSMUSG00000022577	ENSG00000176956	0.0532	0.5035	0.10566
ENSG00000164961	ENSMUSG00000022350	0.0204	0.5205	0.0391931				ENSMUSG00000028328	ENSG00000136842	0.0143	0.5037	0.0283899
ENSG00000067992	ENSMUSG00000035232	0.0151	0.5213	0.028966				ENSMUSG00000006740	ENSG00000170759	0.0143	0.5038	0.0283843
ENSG00000139970	ENSMUSG00000021087	0.107	0.5217	0.205099				ENSMUSG00000061718	ENSG00000131771	0.0664	0.5038	0.131798
ENSG00000139220	ENSMUSG00000053825	0.0105	0.5218	0.0201227				ENSMUSG00000035226	ENSG00000101098	0.0032	0.5045	0.00634291
ENSG00000162729	ENSMUSG00000038034	0.0782	0.5218	0.149866				ENSMUSG00000049550	ENSG00000130779	0.0538	0.5045	0.10664
ENSG00000042493	ENSMUSG00000056737	0.0341	0.522	0.0653257				ENSMUSG00000031969	ENSG00000151498	0.0554	0.5049	0.109725
ENSG00000139641	ENSMUSG00000025366	0.063	0.5224	0.120597				ENSMUSG00000059213	ENSG00000181418	0.1404	0.5051	0.277965
ENSG00000078053	ENSMUSG00000021314	0.086	0.5226	0.164562				ENSMUSG00000050043	ENSG00000213593	0.0362	0.5052	0.0716548
ENSG00000148180	ENSMUSG00000026879	0.0363	0.5227	0.0694471				ENSMUSG00000025781	ENSG00000165629	0.044	0.5055	0.0870425
ENSG00000115677	ENSMUSG00000034088	0.011	0.5235	0.0210124				ENSMUSG00000028373	ENSG00000148219	0.0121	0.5057	0.0239272
ENSG00000108465	ENSMUSG00000018669	0.0586	0.5235	0.111939				ENSMUSG00000068923	ENSG00000132718	0.0212	0.5057	0.0419221
ENSG00000114573	ENSMUSG00000052459	0.0099	0.5239	0.0188967				ENSMUSG00000028811	ENSG00000134684	0.0176	0.5058	0.0347964
ENSG00000185722	ENSMUSG00000020790	0.0268	0.5246	0.0510865				ENSMUSG00000018574	ENSG00000072778	0.0917	0.5059	0.181261
ENSG00000132141	ENSMUSG00000020698	0.0985	0.5247	0.187726				ENSMUSG00000015291	ENSG00000203879	0.0092	0.5061	0.0181782
ENSG00000106125	ENSMUSG00000038022	0.1503	0.5249	0.28634				ENSMUSG00000023017	ENSG00000110881	0.0083	0.5065	0.016387
ENSG00000134982	ENSMUSG00000005871	0.0467	0.5251	0.0889354				ENSMUSG00000052516	ENSG00000185008	0.0207	0.5067	0.0408526
ENSG00000175115	ENSMUSG00000024855	0.0119	0.5252	0.022658				ENSMUSG00000026781	ENSG00000107897	0.1025	0.5087	0.201494
ENSG00000021645	ENSMUSG00000066392	0.0046	0.5253	0.0087569				ENSMUSG00000037234	ENSG00000168172	0.0102	0.5088	0.0200472
ENSG00000151475	ENSMUSG00000069041	0.0592	0.5261	0.112526				ENSMUSG00000060780	ENSG00000162951	0.0138	0.5088	0.0271226
ENSG00000091483	ENSMUSG00000026526	0.0361	0.5267	0.06854				ENSMUSG00000021991	ENSG00000157445	0.0093	0.5089	0.0182747
ENSG00000143761	ENSMUSG00000048076	0	0.5271	0				ENSMUSG00000001036	ENSG00000072134	0.0586	0.5089	0.11515
ENSG00000197043	ENSMUSG00000018340	0.0283	0.5271	0.05369				ENSMUSG00000003316	ENSG00000090863	0.0171	0.509	0.0335953
ENSG00000116675	ENSMUSG00000028528	0.0359	0.5271	0.0681085				ENSMUSG00000033066	ENSG00000007237	0.0126	0.5091	0.0247496
ENSG00000107295	ENSMUSG00000028488	0.0051	0.5276	0.00966641				ENSMUSG00000020524	ENSG00000155511	0.0056	0.5092	0.0109976
ENSG00000143153	ENSMUSG00000026576	0.0306	0.5283	0.0579216				ENSMUSG00000021730	ENSG00000164588	0.0183	0.5097	0.0359035
ENSG00000101421	ENSMUSG00000038467	0.0019	0.5288	0.00359304				ENSMUSG00000062044	ENSG00000142235	0.0507	0.5098	0.0994508
ENSG00000121905	ENSMUSG00000028785	0	0.5289	0				ENSMUSG00000000168	ENSG00000150768	0.0823	0.5099	0.161404
ENSG00000092621	ENSMUSG00000053398	0.0302	0.5289	0.0570996				ENSMUSG00000063063	ENSG00000066032	0.0005	0.5102	0.000980008
ENSG00000154917	ENSMUSG00000032549	0	0.529	0				ENSMUSG00000052698	ENSG00000171914	0.0062	0.5102	0.0121521
ENSG00000057608	ENSMUSG00000021218	0.0178	0.529	0.0336484				ENSMUSG00000019907	ENSG00000058272	0.0429	0.5106	0.0840188
ENSG00000100714	ENSMUSG00000021048	0.0357	0.5292	0.0674603				ENSMUSG00000040265	ENSG00000197959	0.0099	0.5111	0.01937
ENSG00000130340	ENSMUSG00000002365	0.0452	0.5294	0.0853797				ENSMUSG00000066189	ENSG00000006116	0.0057	0.5112	0.0111502
ENSG00000134056	ENSMUSG00000021631	0.0744	0.5296	0.140483				ENSMUSG00000022099	ENSG00000158856	0.0202	0.5122	0.0394377
ENSG00000134056	ENSMUSG00000061474	0.0748	0.5302	0.141079				ENSMUSG00000060961	ENSG00000080493	0.0154	0.5123	0.0300605
ENSG00000173171	ENSMUSG00000064068	0.1537	0.5302	0.289891				ENSMUSG00000053819	ENSG00000145349	0.0088	0.5124	0.0171741
ENSG00000159176	ENSMUSG00000026421	0.0024	0.5303	0.00452574				ENSMUSG00000029211	ENSG00000109158	0.0479	0.5126	0.0934452
ENSG00000110436	ENSMUSG00000005089	0.0227	0.5306	0.0427818				ENSMUSG00000003974	ENSG00000198822	0.0152	0.5129	0.0296354
ENSG00000075785	ENSMUSG00000079477	0	0.531	0				ENSMUSG00000029763	ENSG00000131558	0.02	0.5129	0.038994
ENSG00000184752	ENSMUSG00000020022	0.0632	0.5313	0.118954				ENSMUSG00000024242	ENSG00000011566	0.0198	0.5131	0.038589
ENSG00000174444	ENSMUSG00000032399	0.0305	0.5323	0.0572985				ENSMUSG00000029108	ENSG00000169851	0.0183	0.5132	0.0356586
ENSG00000127481	ENSMUSG00000066036	0.0151	0.5326	0.0283515				ENSMUSG00000022295	ENSG00000155097	0.0089	0.5141	0.0173118
ENSG00000038427	ENSMUSG00000021614	0.2379	0.5329	0.446425				ENSMUSG00000019996	ENSG00000135525	0.1154	0.5141	0.22447
ENSG00000009335	ENSMUSG00000039000	0.0333	0.5335	0.062418				ENSMUSG00000025757	ENSG00000164070	0.0382	0.5143	0.0742757
ENSG00000010256	ENSMUSG00000025651	0.0656	0.5345	0.122732				ENSMUSG00000006273	ENSG00000147416	0.0056	0.5148	0.010878
ENSG00000100412	ENSMUSG00000022477	0.0158	0.5347	0.0295493				ENSMUSG00000053141	ENSG00000196090	0.0067	0.5148	0.0130148
ENSG00000163399	ENSMUSG00000033161	0.0158	0.5353	0.0295162				ENSMUSG00000027438	ENSG00000125814	0	0.5154	0
ENSG00000004478	ENSMUSG00000030357	0.0525	0.5355	0.0980392				ENSMUSG00000070730	ENSG00000137824	0.0822	0.5157	0.159395
ENSG00000169992	ENSMUSG00000051790	0.0079	0.5359	0.0147416				ENSMUSG00000042569	ENSG00000109016	0.1285	0.5157	0.249176
ENSG00000134516	ENSMUSG00000020143	0.0235	0.5363	0.0438188				ENSMUSG00000032480	ENSG00000132153	0.0115	0.516	0.0222868
ENSG00000162869	ENSMUSG00000034709	0.0431	0.5363	0.0803655				ENSMUSG00000034275	ENSG00000080854	0.0189	0.5163	0.0366066
ENSG00000198130	ENSMUSG00000041426	0.0968	0.5368	0.180328				ENSMUSG00000041112	ENSG00000155849	0.0019	0.5164	0.00367932
ENSG00000103723	ENSMUSG00000062444	0.0243	0.5369	0.0452598				ENSMUSG00000022957	ENSG00000205726	0.0247	0.5166	0.0478126
ENSG00000018189	ENSMUSG00000029291	0.0343	0.5373	0.0638377				ENSMUSG00000004936	ENSG00000169032	0.0046	0.5169	0.00889921
ENSG00000006740	ENSMUSG00000033389	0.0324	0.5374	0.0602903				ENSMUSG00000032482	ENSG00000114646	0.0705	0.517	0.136364
ENSG00000128641	ENSMUSG00000018417	0.0103	0.5375	0.0191628				ENSMUSG00000020456	ENSG00000105953	0.0216	0.5175	0.0417391
ENSG00000168385	ENSMUSG00000026276	0.0063	0.5378	0.0117144				ENSMUSG00000076439	ENSG00000204655	0.0831	0.5175	0.16058
ENSG00000171533	ENSMUSG00000055407	0.1828	0.538	0.339777				ENSMUSG00000024533	ENSG00000134278	0.0359	0.5176	0.0693586
ENSG00000197872	ENSMUSG00000020589	0.0014	0.5381	0.00260175				ENSMUSG00000032279	ENSG00000166411	0.0117	0.5181	0.0225825
ENSG00000186522	ENSMUSG00000019917	0.0761	0.5381	0.141424				ENSMUSG00000019790	ENSG00000164506	0.0223	0.5182	0.0430336
ENSG00000009844	ENSMUSG00000019868	0.0393	0.5383	0.0730076				ENSMUSG00000040359	ENSG00000014123	0.0497	0.5188	0.095798
ENSG00000129625	ENSMUSG00000005873	0.027	0.5391	0.0500835				ENSMUSG00000059981	ENSG00000149930	0.0388	0.519	0.0747592
ENSG00000187231	ENSMUSG00000042272	0.0086	0.5394	0.0159436				ENSMUSG00000015829	ENSG00000116147	0.0334	0.5191	0.0643421
ENSG00000136167	ENSMUSG00000021998	0.0152	0.5394	0.0281795				ENSMUSG00000028354	ENSG00000155816	0.1126	0.5191	0.216914
ENSG00000124198	ENSMUSG00000074582	0.0219	0.5399	0.0405631				ENSMUSG00000020402	ENSG00000213585	0.0065	0.5192	0.0125193
ENSG00000185666	ENSMUSG00000059602	0.0387	0.5401	0.0716534				ENSMUSG00000030695	ENSG00000149925	0.0101	0.5192	0.019453
ENSG00000100592	ENSMUSG00000034574	0.0138	0.5404	0.0255366				ENSMUSG00000068036	ENSG00000130396	0.031	0.5195	0.0596728
ENSG00000124406	ENSMUSG00000037685	0.0089	0.5405	0.0164662				ENSMUSG00000021733	ENSG00000033867	0.0318	0.5198	0.0611774
ENSG00000107819	ENSMUSG00000025212	0.0313	0.5413	0.0578238				ENSMUSG00000030209	ENSG00000150086	0.0058	0.5199	0.011156
ENSG00000140575	ENSMUSG00000030536	0.0213	0.5419	0.0393061				ENSMUSG00000021087	ENSG00000139970	0.107	0.5217	0.205099
ENSG00000149294	ENSMUSG00000039542	0.0278	0.5432	0.0511782				ENSMUSG00000053825	ENSG00000139220	0.0105	0.5218	0.0201227
ENSG00000006747	ENSMUSG00000002565	0.0465	0.5432	0.0856038				ENSMUSG00000038034	ENSG00000162729	0.0782	0.5218	0.149866
ENSG00000111669	ENSMUSG00000023456	0.0244	0.5433	0.0449107				ENSMUSG00000021314	ENSG00000078053	0.086	0.5226	0.164562
ENSG00000108262	ENSMUSG00000011877	0.0106	0.5442	0.0194781				ENSMUSG00000026879	ENSG00000148180	0.0363	0.5227	0.0694471
ENSG00000108797	ENSMUSG00000017167	0.0339	0.5446	0.0622475				ENSMUSG00000032773	ENSG00000168539	0.0048	0.5228	0.00918133
ENSG00000150054	ENSMUSG00000057440	0.0356	0.5448	0.0653451				ENSMUSG00000034088	ENSG00000115677	0.011	0.5235	0.0210124
ENSG00000145362	ENSMUSG00000032826	0.0419	0.5448	0.076909				ENSMUSG00000053317	ENSG00000106803	0.005	0.5236	0.00954927
ENSG00000124194	ENSMUSG00000017943	0.0093	0.5451	0.0170611				ENSMUSG00000052459	ENSG00000114573	0.0099	0.5239	0.0188967
ENSG00000073969	ENSMUSG00000034187	0.0089	0.5455	0.0163153				ENSMUSG00000038264	ENSG00000138623	0.0528	0.5243	0.100706
ENSG00000166947	ENSMUSG00000023216	0.1688	0.5456	0.309384				ENSMUSG00000028975	ENSG00000142655	0.0338	0.5244	0.0644546
ENSG00000186472	ENSMUSG00000061601	0.0926	0.5459	0.169628				ENSMUSG00000020698	ENSG00000132141	0.0985	0.5247	0.187726
ENSG00000125447	ENSMUSG00000020740	0.0668	0.546	0.122344				ENSMUSG00000005871	ENSG00000134982	0.0467	0.5251	0.0889354
ENSG00000116266	ENSMUSG00000027882	0.0413	0.5461	0.0756272				ENSMUSG00000024855	ENSG00000175115	0.0119	0.5252	0.022658
ENSG00000113643	ENSMUSG00000018848	0.044	0.5462	0.0805566				ENSMUSG00000066392	ENSG00000021645	0.0046	0.5253	0.0087569
ENSG00000100167	ENSMUSG00000022456	0.028	0.5463	0.0512539				ENSMUSG00000030282	ENSG00000111726	0.0322	0.5266	0.061147
ENSG00000131473	ENSMUSG00000020917	0.0088	0.5464	0.0161054				ENSMUSG00000048076	ENSG00000143761	0	0.5271	0
ENSG00000100003	ENSMUSG00000003585	0.033	0.5466	0.0603732				ENSMUSG00000028528	ENSG00000116675	0.0359	0.5271	0.0681085
ENSG00000124207	ENSMUSG00000002718	0.0048	0.5475	0.00876712				ENSMUSG00000052581	ENSG00000176204	0.0228	0.5273	0.0432391
ENSG00000163541	ENSMUSG00000052738	0.0396	0.548	0.0722628				ENSMUSG00000028488	ENSG00000107295	0.0051	0.5276	0.00966641
ENSG00000126432	ENSMUSG00000024953	0.1489	0.5481	0.271666				ENSMUSG00000026576	ENSG00000143153	0.0306	0.5283	0.0579216
ENSG00000120549	ENSMUSG00000036617	0.113	0.5482	0.206129				ENSMUSG00000038467	ENSG00000101421	0.0019	0.5288	0.00359304
ENSG00000197555	ENSMUSG00000042700	0.0195	0.5492	0.0355062				ENSMUSG00000028785	ENSG00000121905	0	0.5289	0
ENSG00000115306	ENSMUSG00000020315	0.0077	0.5493	0.0140178				ENSMUSG00000053398	ENSG00000092621	0.0302	0.5289	0.0570996
ENSG00000099365	ENSMUSG00000030806	0	0.5497	0				ENSMUSG00000032549	ENSG00000154917	0	0.529	0
ENSG00000058668	ENSMUSG00000026463	0.0884	0.5502	0.160669				ENSMUSG00000021048	ENSG00000100714	0.0357	0.5292	0.0674603
ENSG00000037042	ENSMUSG00000045007	0.0104	0.5504	0.0188953				ENSMUSG00000048578	ENSG00000110917	0.0453	0.5295	0.0855524
ENSG00000189043	ENSMUSG00000029632	0.057	0.5509	0.103467				ENSMUSG00000050390	ENSG00000162522	0.1061	0.5301	0.200151
ENSG00000079215	ENSMUSG00000005360	0.0156	0.5511	0.028307				ENSMUSG00000061474	ENSG00000134056	0.0748	0.5302	0.141079
ENSG00000141720	ENSMUSG00000018547	0.0041	0.5521	0.00742619				ENSMUSG00000064068	ENSG00000173171	0.1537	0.5302	0.289891
ENSG00000082805	ENSMUSG00000030172	0.0128	0.5522	0.02318				ENSMUSG00000046240	ENSG00000165478	0.0246	0.5304	0.0463801
ENSG00000122966	ENSMUSG00000029516	0.0152	0.5522	0.0275263				ENSMUSG00000005089	ENSG00000110436	0.0227	0.5306	0.0427818
ENSG00000152234	ENSMUSG00000025428	0.0123	0.5525	0.0222624				ENSMUSG00000079477	ENSG00000075785	0	0.531	0
ENSG00000129515	ENSMUSG00000005656	0.0022	0.5535	0.00397471				ENSMUSG00000049076	ENSG00000114331	0.0178	0.5313	0.0335027
ENSG00000124942	ENSMUSG00000069833	0.0905	0.5535	0.163505				ENSMUSG00000024502	ENSG00000176049	0.0098	0.5322	0.0184141
ENSG00000171202	ENSMUSG00000030615	0.1702	0.5536	0.307442				ENSMUSG00000020621	ENSG00000240857	0.0506	0.5322	0.095077
ENSG00000115840	ENSMUSG00000027010	0.0167	0.5537	0.0301607				ENSMUSG00000032399	ENSG00000174444	0.0305	0.5323	0.0572985
ENSG00000152932	ENSMUSG00000021700	0.0124	0.5538	0.0223908				ENSMUSG00000074923	ENSG00000137843	0.0359	0.5326	0.0674052
ENSG00000011347	ENSMUSG00000024743	0.0082	0.5541	0.0147988				ENSMUSG00000021614	ENSG00000038427	0.2379	0.5329	0.446425
ENSG00000204351	ENSMUSG00000040356	0.0339	0.5542	0.0611693				ENSMUSG00000025651	ENSG00000010256	0.0656	0.5345	0.122732
ENSG00000105568	ENSMUSG00000007564	0.0008	0.5548	0.00144196				ENSMUSG00000038910	ENSG00000154822	0.0109	0.5346	0.0203891
ENSG00000189221	ENSMUSG00000025037	0.0711	0.555	0.128108				ENSMUSG00000033161	ENSG00000163399	0.0158	0.5353	0.0295162
ENSG00000111530	ENSMUSG00000020114	0.0027	0.5551	0.00486399				ENSMUSG00000051790	ENSG00000169992	0.0079	0.5359	0.0147416
ENSG00000132842	ENSMUSG00000021686	0.0717	0.5554	0.129096				ENSMUSG00000038828	ENSG00000119777	0.1035	0.5362	0.193025
ENSG00000110435	ENSMUSG00000010914	0.0838	0.5554	0.150882				ENSMUSG00000034709	ENSG00000162869	0.0431	0.5363	0.0803655
ENSG00000182621	ENSMUSG00000051177	0.0126	0.556	0.0226619				ENSMUSG00000062444	ENSG00000103723	0.0243	0.5369	0.0452598
ENSG00000133835	ENSMUSG00000024507	0.0735	0.5563	0.132123				ENSMUSG00000026426	ENSG00000143862	0.0023	0.5373	0.00428066
ENSG00000069966	ENSMUSG00000032192	0.0034	0.5567	0.00610742				ENSMUSG00000029291	ENSG00000018189	0.0343	0.5373	0.0638377
ENSG00000170579	ENSMUSG00000003279	0.0178	0.5573	0.0319397				ENSMUSG00000033389	ENSG00000006740	0.0324	0.5374	0.0602903
ENSG00000078369	ENSMUSG00000029064	0.0006	0.5577	0.00107585				ENSMUSG00000018417	ENSG00000128641	0.0103	0.5375	0.0191628
ENSG00000149541	ENSMUSG00000071649	0.0209	0.5588	0.0374016				ENSMUSG00000026276	ENSG00000168385	0.0063	0.5378	0.0117144
ENSG00000103647	ENSMUSG00000041729	0.008	0.5591	0.0143087				ENSMUSG00000060090	ENSG00000102218	0.0605	0.5378	0.112495
ENSG00000161204	ENSMUSG00000003234	0.0171	0.5595	0.030563				ENSMUSG00000055407	ENSG00000171533	0.1828	0.538	0.339777
ENSG00000166136	ENSMUSG00000025204	0.0979	0.5596	0.174946				ENSMUSG00000019917	ENSG00000186522	0.0761	0.5381	0.141424
ENSG00000174903	ENSMUSG00000024870	0.0043	0.5598	0.00768131				ENSMUSG00000035051	ENSG00000163214	0.0781	0.5384	0.145059
ENSG00000080845	ENSMUSG00000061689	0.0184	0.5601	0.0328513				ENSMUSG00000005873	ENSG00000129625	0.027	0.5391	0.0500835
ENSG00000130638	ENSMUSG00000016541	0.0988	0.5604	0.176303				ENSMUSG00000059602	ENSG00000185666	0.0387	0.5401	0.0716534
ENSG00000136153	ENSMUSG00000033060	0.1163	0.561	0.207308				ENSMUSG00000045441	ENSG00000185477	0.3075	0.5403	0.569128
ENSG00000019144	ENSMUSG00000048537	0.0283	0.5618	0.0503738				ENSMUSG00000034574	ENSG00000100592	0.0138	0.5404	0.0255366
ENSG00000070756	ENSMUSG00000051732	0.1049	0.5619	0.186688				ENSMUSG00000037685	ENSG00000124406	0.0089	0.5405	0.0164662
ENSG00000146676	ENSMUSG00000091207	0.0076	0.5626	0.0135087				ENSMUSG00000025212	ENSG00000107819	0.0313	0.5413	0.0578238
ENSG00000054116	ENSMUSG00000028847	0.0079	0.5627	0.0140395				ENSMUSG00000004748	ENSG00000242114	0.0658	0.5414	0.121537
ENSG00000033627	ENSMUSG00000019302	0.0187	0.5628	0.0332267				ENSMUSG00000039542	ENSG00000149294	0.0278	0.5432	0.0511782
ENSG00000105193	ENSMUSG00000037563	0	0.5629	0				ENSMUSG00000026207	ENSG00000072195	0.0441	0.5432	0.0811856
ENSG00000215301	ENSMUSG00000039224	0.0221	0.5631	0.039247				ENSMUSG00000023456	ENSG00000111669	0.0244	0.5433	0.0449107
ENSG00000156011	ENSMUSG00000030465	0.1148	0.5639	0.203582				ENSMUSG00000044847	ENSG00000155858	0.0664	0.5433	0.122216
ENSG00000166226	ENSMUSG00000034024	0.0114	0.564	0.0202128				ENSMUSG00000011877	ENSG00000108262	0.0106	0.5442	0.0194781
ENSG00000065613	ENSMUSG00000025060	0.0932	0.564	0.165248				ENSMUSG00000017167	ENSG00000108797	0.0339	0.5446	0.0622475
ENSG00000068120	ENSMUSG00000001755	0.0692	0.5641	0.122673				ENSMUSG00000032826	ENSG00000145362	0.0419	0.5448	0.076909
ENSG00000160014	ENSMUSG00000019370	0	0.5644	0				ENSMUSG00000017943	ENSG00000124194	0.0093	0.5451	0.0170611
ENSG00000136854	ENSMUSG00000026797	0	0.5646	0				ENSMUSG00000054793	ENSG00000105767	0.0083	0.5453	0.015221
ENSG00000116120	ENSMUSG00000026245	0.036	0.5649	0.0637281				ENSMUSG00000034187	ENSG00000073969	0.0089	0.5455	0.0163153
ENSG00000169021	ENSMUSG00000038462	0.0652	0.5649	0.115419				ENSMUSG00000011752	ENSG00000226784	0.0215	0.5459	0.0393845
ENSG00000143850	ENSMUSG00000041757	0.0671	0.5649	0.118782				ENSMUSG00000061601	ENSG00000186472	0.0926	0.5459	0.169628
ENSG00000136628	ENSMUSG00000026615	0.057	0.5657	0.10076				ENSMUSG00000022208	ENSG00000092051	0.0194	0.546	0.0355311
ENSG00000187672	ENSMUSG00000040640	0.0084	0.5661	0.0148384				ENSMUSG00000018848	ENSG00000113643	0.044	0.5462	0.0805566
ENSG00000135905	ENSMUSG00000038608	0.0312	0.5663	0.0550945				ENSMUSG00000022456	ENSG00000100167	0.028	0.5463	0.0512539
ENSG00000132589	ENSMUSG00000061981	0.0032	0.5667	0.00564673				ENSMUSG00000020917	ENSG00000131473	0.0088	0.5464	0.0161054
ENSG00000108861	ENSMUSG00000003518	0.0323	0.5669	0.0569765				ENSMUSG00000052738	ENSG00000163541	0.0396	0.548	0.0722628
ENSG00000068793	ENSMUSG00000030447	0.0043	0.5683	0.00756643				ENSMUSG00000024953	ENSG00000126432	0.1489	0.5481	0.271666
ENSG00000164830	ENSMUSG00000022307	0.0919	0.5683	0.16171				ENSMUSG00000036882	ENSG00000004777	0.0433	0.5488	0.0788994
ENSG00000204394	ENSMUSG00000007029	0.0331	0.5686	0.0582132				ENSMUSG00000021476	ENSG00000130956	0.0857	0.549	0.156102
ENSG00000115685	ENSMUSG00000026275	0.0272	0.5688	0.04782				ENSMUSG00000042700	ENSG00000197555	0.0195	0.5492	0.0355062
ENSG00000133083	ENSMUSG00000027797	0.0363	0.5688	0.0638186				ENSMUSG00000020315	ENSG00000115306	0.0077	0.5493	0.0140178
ENSG00000124181	ENSMUSG00000016933	0.019	0.5689	0.0333978				ENSMUSG00000030806	ENSG00000099365	0	0.5497	0
ENSG00000083845	ENSMUSG00000012848	0.0044	0.5691	0.00773151				ENSMUSG00000026463	ENSG00000058668	0.0884	0.5502	0.160669
ENSG00000112992	ENSMUSG00000025453	0.0322	0.5693	0.0565607				ENSMUSG00000021259	ENSG00000036530	0.0236	0.5504	0.0428779
ENSG00000148700	ENSMUSG00000025026	0.0393	0.5694	0.06902				ENSMUSG00000029632	ENSG00000189043	0.057	0.5509	0.103467
ENSG00000112685	ENSMUSG00000021357	0.0334	0.5696	0.0586376				ENSMUSG00000005360	ENSG00000079215	0.0156	0.5511	0.028307
ENSG00000141551	ENSMUSG00000025162	0.0011	0.5699	0.00193016				ENSMUSG00000018428	ENSG00000121057	0.19	0.5512	0.344702
ENSG00000217930	ENSMUSG00000014301	0.0228	0.57	0.04				ENSMUSG00000032020	ENSG00000154127	0.0115	0.5518	0.0208409
ENSG00000091157	ENSMUSG00000040560	0.0253	0.5704	0.0443548				ENSMUSG00000011752	ENSG00000171314	0.0017	0.552	0.00307971
ENSG00000041982	ENSMUSG00000028364	0.0676	0.5717	0.118244				ENSMUSG00000018547	ENSG00000141720	0.0041	0.5521	0.00742619
ENSG00000149313	ENSMUSG00000025894	0.0417	0.5718	0.0729276				ENSMUSG00000030172	ENSG00000082805	0.0128	0.5522	0.02318
ENSG00000164919	ENSMUSG00000014313	0.1536	0.572	0.268531				ENSMUSG00000029516	ENSG00000122966	0.0152	0.5522	0.0275263
ENSG00000047056	ENSMUSG00000021147	0.0157	0.5722	0.027438				ENSMUSG00000038525	ENSG00000170632	0.1319	0.5522	0.238863
ENSG00000182199	ENSMUSG00000025403	0.0316	0.5725	0.0551965				ENSMUSG00000030092	ENSG00000134115	0.054	0.5524	0.0977552
ENSG00000160752	ENSMUSG00000059743	0.0855	0.5731	0.149189				ENSMUSG00000025428	ENSG00000152234	0.0123	0.5525	0.0222624
ENSG00000151632	ENSMUSG00000021214	0.1846	0.5738	0.321715				ENSMUSG00000027010	ENSG00000115840	0.0167	0.5537	0.0301607
ENSG00000127527	ENSMUSG00000006276	0.0404	0.574	0.0703833				ENSMUSG00000021700	ENSG00000152932	0.0124	0.5538	0.0223908
ENSG00000105270	ENSMUSG00000013921	0.0068	0.5742	0.0118426				ENSMUSG00000024743	ENSG00000011347	0.0082	0.5541	0.0147988
ENSG00000182718	ENSMUSG00000032231	0.0121	0.5743	0.0210691				ENSMUSG00000007564	ENSG00000105568	0.0008	0.5548	0.00144196
ENSG00000178952	ENSMUSG00000073838	0.0349	0.5743	0.0607696				ENSMUSG00000025037	ENSG00000189221	0.0711	0.555	0.128108
ENSG00000184524	ENSMUSG00000060240	0.1118	0.5743	0.194672				ENSMUSG00000020114	ENSG00000111530	0.0027	0.5551	0.00486399
ENSG00000137710	ENSMUSG00000032050	0.007	0.5745	0.0121845				ENSMUSG00000069170	ENSG00000164199	0.1138	0.5551	0.205008
ENSG00000172053	ENSMUSG00000032604	0.0547	0.5746	0.0951967				ENSMUSG00000010914	ENSG00000110435	0.0838	0.5554	0.150882
ENSG00000129244	ENSMUSG00000041329	0.0121	0.5747	0.0210545				ENSMUSG00000051177	ENSG00000182621	0.0126	0.556	0.0226619
ENSG00000103043	ENSMUSG00000010936	0.0265	0.5747	0.046111				ENSMUSG00000024507	ENSG00000133835	0.0735	0.5563	0.132123
ENSG00000131711	ENSMUSG00000052727	0.0494	0.5754	0.0858533				ENSMUSG00000024792	ENSG00000162300	0.0386	0.5566	0.0693496
ENSG00000170558	ENSMUSG00000024304	0.0165	0.576	0.0286458				ENSMUSG00000032192	ENSG00000069966	0.0034	0.5567	0.00610742
ENSG00000189058	ENSMUSG00000022548	0.1916	0.5761	0.332581				ENSMUSG00000035342	ENSG00000107816	0.0376	0.5571	0.0674924
ENSG00000133943	ENSMUSG00000021185	0.1624	0.5769	0.281505				ENSMUSG00000003279	ENSG00000170579	0.0178	0.5573	0.0319397
ENSG00000164434	ENSMUSG00000019874	0.0754	0.5773	0.130608				ENSMUSG00000029064	ENSG00000078369	0.0006	0.5577	0.00107585
ENSG00000184277	ENSMUSG00000078681	0.0789	0.5773	0.136671				ENSMUSG00000046230	ENSG00000197969	0.0856	0.5577	0.153488
ENSG00000108829	ENSMUSG00000020869	0.0207	0.5784	0.0357884				ENSMUSG00000041729	ENSG00000103647	0.008	0.5591	0.0143087
ENSG00000137409	ENSMUSG00000024012	0.0083	0.5785	0.0143475				ENSMUSG00000025204	ENSG00000166136	0.0979	0.5596	0.174946
ENSG00000100280	ENSMUSG00000009090	0.0142	0.5787	0.0245378				ENSMUSG00000024870	ENSG00000174903	0.0043	0.5598	0.00768131
ENSG00000158710	ENSMUSG00000026547	0.0156	0.5787	0.026957				ENSMUSG00000061689	ENSG00000080845	0.0184	0.5601	0.0328513
ENSG00000137992	ENSMUSG00000000340	0.0654	0.5801	0.112739				ENSMUSG00000041720	ENSG00000241973	0.012	0.5606	0.0214056
ENSG00000178952	ENSMUSG00000030735	0.0361	0.5802	0.0622199				ENSMUSG00000049807	ENSG00000225485	0.0459	0.5609	0.0818328
ENSG00000175662	ENSMUSG00000000538	0.0264	0.5805	0.045478				ENSMUSG00000033060	ENSG00000136153	0.1163	0.561	0.207308
ENSG00000075673	ENSMUSG00000022229	0.0721	0.5805	0.124203				ENSMUSG00000027522	ENSG00000124222	0.0322	0.5613	0.0573668
ENSG00000196305	ENSMUSG00000037851	0.0493	0.5806	0.0849122				ENSMUSG00000048537	ENSG00000019144	0.0283	0.5618	0.0503738
ENSG00000115839	ENSMUSG00000036104	0.036	0.5807	0.0619941				ENSMUSG00000051732	ENSG00000070756	0.1049	0.5619	0.186688
ENSG00000083720	ENSMUSG00000022186	0.0404	0.5812	0.0695114				ENSMUSG00000028847	ENSG00000054116	0.0079	0.5627	0.0140395
ENSG00000132434	ENSMUSG00000062190	0.0582	0.5812	0.100138				ENSMUSG00000019302	ENSG00000033627	0.0187	0.5628	0.0332267
ENSG00000113758	ENSMUSG00000034675	0.0792	0.5821	0.136059				ENSMUSG00000037563	ENSG00000105193	0	0.5629	0
ENSG00000147526	ENSMUSG00000065954	0.1486	0.5821	0.255283				ENSMUSG00000036698	ENSG00000123908	0.0036	0.5629	0.00639545
ENSG00000174469	ENSMUSG00000039419	0.0322	0.5834	0.0551937				ENSMUSG00000022820	ENSG00000065518	0.179	0.563	0.31794
ENSG00000117266	ENSMUSG00000026437	0.04	0.5835	0.0685518				ENSMUSG00000034024	ENSG00000166226	0.0114	0.564	0.0202128
ENSG00000214021	ENSMUSG00000030276	0.1469	0.584	0.251541				ENSMUSG00000019370	ENSG00000160014	0	0.5644	0
ENSG00000076201	ENSMUSG00000036057	0.0438	0.5844	0.0749487				ENSMUSG00000046598	ENSG00000161267	0.0722	0.5645	0.127901
ENSG00000164082	ENSMUSG00000023192	0.0119	0.5848	0.0203488				ENSMUSG00000026797	ENSG00000136854	0	0.5646	0
ENSG00000100884	ENSMUSG00000022212	0.0097	0.5853	0.0165727				ENSMUSG00000025508	ENSG00000177600	0.0044	0.5649	0.00778899
ENSG00000077279	ENSMUSG00000031285	0.0025	0.5857	0.0042684				ENSMUSG00000026245	ENSG00000116120	0.036	0.5649	0.0637281
ENSG00000134121	ENSMUSG00000030077	0.0814	0.5857	0.138979				ENSMUSG00000038462	ENSG00000169021	0.0652	0.5649	0.115419
ENSG00000157087	ENSMUSG00000030302	0.0049	0.5859	0.0083632				ENSMUSG00000041757	ENSG00000143850	0.0671	0.5649	0.118782
ENSG00000101400	ENSMUSG00000027488	0.038	0.5859	0.0648575				ENSMUSG00000038848	ENSG00000149658	0.0309	0.565	0.0546903
ENSG00000102934	ENSMUSG00000031775	0.0572	0.5859	0.0976276				ENSMUSG00000052373	ENSG00000161647	0.0448	0.5651	0.079278
ENSG00000117600	ENSMUSG00000044667	0.018	0.5861	0.0307115				ENSMUSG00000036815	ENSG00000175497	0.0625	0.5655	0.110522
ENSG00000198836	ENSMUSG00000038084	0.0189	0.5863	0.0322361				ENSMUSG00000031149	ENSG00000243279	0.0462	0.5656	0.0816832
ENSG00000183454	ENSMUSG00000059003	0.0229	0.5876	0.0389721				ENSMUSG00000026615	ENSG00000136628	0.057	0.5657	0.10076
ENSG00000101997	ENSMUSG00000031143	0.0641	0.5878	0.109051				ENSMUSG00000040640	ENSG00000187672	0.0084	0.5661	0.0148384
ENSG00000070756	ENSMUSG00000046173	0.1005	0.5879	0.170947				ENSMUSG00000038608	ENSG00000135905	0.0312	0.5663	0.0550945
ENSG00000138182	ENSMUSG00000024795	0.1617	0.5879	0.275047				ENSMUSG00000061981	ENSG00000132589	0.0032	0.5667	0.00564673
ENSG00000138095	ENSMUSG00000024120	0.156	0.5881	0.265261				ENSMUSG00000030447	ENSG00000068793	0.0043	0.5683	0.00756643
ENSG00000122694	ENSMUSG00000028480	0.0331	0.5882	0.0562734				ENSMUSG00000007029	ENSG00000204394	0.0331	0.5686	0.0582132
ENSG00000156049	ENSMUSG00000024697	0.0152	0.5885	0.0258284				ENSMUSG00000027797	ENSG00000133083	0.0363	0.5688	0.0638186
ENSG00000158186	ENSMUSG00000032470	0.0157	0.5888	0.0266644				ENSMUSG00000012848	ENSG00000083845	0.0044	0.5691	0.00773151
ENSG00000148468	ENSMUSG00000050530	0.0397	0.589	0.0674024				ENSMUSG00000025453	ENSG00000112992	0.0322	0.5693	0.0565607
ENSG00000154027	ENSMUSG00000039058	0.0445	0.5896	0.0754749				ENSMUSG00000025026	ENSG00000148700	0.0393	0.5694	0.06902
ENSG00000148798	ENSMUSG00000034336	0.0277	0.5903	0.0469253				ENSMUSG00000021357	ENSG00000112685	0.0334	0.5696	0.0586376
ENSG00000171246	ENSMUSG00000025582	0.0162	0.5904	0.027439				ENSMUSG00000030020	ENSG00000163637	0.0209	0.5697	0.036686
ENSG00000105875	ENSMUSG00000058486	0.0387	0.5904	0.0655488				ENSMUSG00000039740	ENSG00000119523	0.1188	0.5698	0.208494
ENSG00000165264	ENSMUSG00000071014	0.2153	0.5905	0.364606				ENSMUSG00000025162	ENSG00000141551	0.0011	0.5699	0.00193016
ENSG00000106976	ENSMUSG00000026825	0.0069	0.5908	0.0116791				ENSMUSG00000040560	ENSG00000091157	0.0253	0.5704	0.0443548
ENSG00000144635	ENSMUSG00000032435	0.0277	0.5908	0.0468856				ENSMUSG00000075318	ENSG00000136531	0.0103	0.5714	0.0180259
ENSG00000090861	ENSMUSG00000031960	0.0222	0.5914	0.037538				ENSMUSG00000014313	ENSG00000164919	0.1536	0.572	0.268531
ENSG00000140945	ENSMUSG00000031841	0.049	0.5914	0.0828542				ENSMUSG00000021147	ENSG00000047056	0.0157	0.5722	0.027438
ENSG00000182149	ENSMUSG00000031729	0.1346	0.5914	0.227596				ENSMUSG00000031924	ENSG00000103018	0.1457	0.5729	0.25432
ENSG00000132692	ENSMUSG00000004892	0.0928	0.5917	0.156836				ENSMUSG00000006276	ENSG00000127527	0.0404	0.574	0.0703833
ENSG00000108515	ENSMUSG00000060600	0.0104	0.5918	0.0175735				ENSMUSG00000013921	ENSG00000105270	0.0068	0.5742	0.0118426
ENSG00000072110	ENSMUSG00000015143	0.0039	0.5925	0.00658228				ENSMUSG00000073838	ENSG00000178952	0.0349	0.5743	0.0607696
ENSG00000128487	ENSMUSG00000042331	0.0844	0.5929	0.142351				ENSMUSG00000060240	ENSG00000184524	0.1118	0.5743	0.194672
ENSG00000204590	ENSMUSG00000024429	0.0221	0.5949	0.0371491				ENSMUSG00000032050	ENSG00000137710	0.007	0.5745	0.0121845
ENSG00000007923	ENSMUSG00000039768	0.0154	0.5956	0.0258563				ENSMUSG00000032604	ENSG00000172053	0.0547	0.5746	0.0951967
ENSG00000187134	ENSMUSG00000021214	0.1729	0.5957	0.290247				ENSMUSG00000041329	ENSG00000129244	0.0121	0.5747	0.0210545
ENSG00000157483	ENSMUSG00000032220	0.0194	0.5965	0.0325231				ENSMUSG00000052727	ENSG00000131711	0.0494	0.5754	0.0858533
ENSG00000143878	ENSMUSG00000054364	0	0.5967	0				ENSMUSG00000030102	ENSG00000150995	0.0053	0.576	0.00920139
ENSG00000002746	ENSMUSG00000021301	0.0629	0.5967	0.105413				ENSMUSG00000024304	ENSG00000170558	0.0165	0.576	0.0286458
ENSG00000142657	ENSMUSG00000028961	0.0313	0.5972	0.0524113				ENSMUSG00000020869	ENSG00000108829	0.0207	0.5784	0.0357884
ENSG00000075142	ENSMUSG00000003161	0.0196	0.5977	0.0327924				ENSMUSG00000024012	ENSG00000137409	0.0083	0.5785	0.0143475
ENSG00000170584	ENSMUSG00000020328	0.0028	0.5989	0.00467524				ENSMUSG00000009090	ENSG00000100280	0.0142	0.5787	0.0245378
ENSG00000162105	ENSMUSG00000037541	0.0774	0.5993	0.129151				ENSMUSG00000004285	ENSG00000128524	0.0072	0.5789	0.0124374
ENSG00000147471	ENSMUSG00000031485	0.0775	0.6006	0.129038				ENSMUSG00000037386	ENSG00000176406	0.0526	0.579	0.0908463
ENSG00000149925	ENSMUSG00000059343	0.0315	0.6008	0.0524301				ENSMUSG00000008682	ENSG00000147403	0	0.5791	0
ENSG00000181789	ENSMUSG00000030058	0.0126	0.6014	0.0209511				ENSMUSG00000033916	ENSG00000130724	0.0019	0.5797	0.00327756
ENSG00000101473	ENSMUSG00000017307	0.0799	0.6017	0.13279				ENSMUSG00000000538	ENSG00000175662	0.0264	0.5805	0.045478
ENSG00000124140	ENSMUSG00000017740	0.0139	0.6018	0.0230974				ENSMUSG00000022229	ENSG00000075673	0.0721	0.5805	0.124203
ENSG00000128050	ENSMUSG00000029247	0.025	0.602	0.0415282				ENSMUSG00000062190	ENSG00000132434	0.0582	0.5812	0.100138
ENSG00000134202	ENSMUSG00000004032	0.0661	0.6021	0.109782				ENSMUSG00000034675	ENSG00000113758	0.0792	0.5821	0.136059
ENSG00000131828	ENSMUSG00000031299	0.0108	0.6022	0.0179342				ENSMUSG00000039419	ENSG00000174469	0.0322	0.5834	0.0551937
ENSG00000112304	ENSMUSG00000006717	0.0991	0.6022	0.164563				ENSMUSG00000026437	ENSG00000117266	0.04	0.5835	0.0685518
ENSG00000115275	ENSMUSG00000030036	0.0782	0.6034	0.129599				ENSMUSG00000046173	ENSG00000151846	0.1326	0.5842	0.226977
ENSG00000079950	ENSMUSG00000019998	0.0298	0.604	0.0493377				ENSMUSG00000030120	ENSG00000089693	0.0125	0.5845	0.0213858
ENSG00000154277	ENSMUSG00000029223	0.0213	0.6044	0.0352416				ENSMUSG00000032625	ENSG00000005108	0.0467	0.5845	0.0798973
ENSG00000111731	ENSMUSG00000030279	0.0187	0.6047	0.0309244				ENSMUSG00000023192	ENSG00000164082	0.0119	0.5848	0.0203488
ENSG00000090989	ENSMUSG00000036435	0.0129	0.6049	0.0213258				ENSMUSG00000041020	ENSG00000184368	0.1463	0.5857	0.249787
ENSG00000069424	ENSMUSG00000028931	0.0047	0.6052	0.00776603				ENSMUSG00000030302	ENSG00000157087	0.0049	0.5859	0.0083632
ENSG00000164111	ENSMUSG00000027712	0.0374	0.6054	0.0617773				ENSMUSG00000031775	ENSG00000102934	0.0572	0.5859	0.0976276
ENSG00000137312	ENSMUSG00000059714	0.0074	0.6061	0.0122092				ENSMUSG00000044667	ENSG00000117600	0.018	0.5861	0.0307115
ENSG00000075415	ENSMUSG00000061904	0.0598	0.6065	0.0985985				ENSMUSG00000038084	ENSG00000198836	0.0189	0.5863	0.0322361
ENSG00000119705	ENSMUSG00000021040	0.1906	0.6069	0.314055				ENSMUSG00000074886	ENSG00000198055	0.0199	0.5865	0.0339301
ENSG00000156261	ENSMUSG00000025613	0.018	0.6072	0.0296443				ENSMUSG00000009112	ENSG00000099968	0.1496	0.5871	0.254812
ENSG00000108946	ENSMUSG00000020612	0.016	0.6073	0.0263461				ENSMUSG00000059003	ENSG00000183454	0.0229	0.5876	0.0389721
ENSG00000143870	ENSMUSG00000020571	0.0276	0.6075	0.0454321				ENSMUSG00000046173	ENSG00000070756	0.1005	0.5879	0.170947
ENSG00000186642	ENSMUSG00000030653	0.0306	0.6083	0.0503041				ENSMUSG00000028480	ENSG00000122694	0.0331	0.5882	0.0562734
ENSG00000070718	ENSMUSG00000031539	0.0079	0.6085	0.0129827				ENSMUSG00000027709	ENSG00000078070	0.0855	0.5883	0.145334
ENSG00000147475	ENSMUSG00000031483	0.0121	0.6086	0.0198817				ENSMUSG00000024697	ENSG00000156049	0.0152	0.5885	0.0258284
ENSG00000084710	ENSMUSG00000020658	0.0115	0.6091	0.0188803				ENSMUSG00000049100	ENSG00000138650	0.0161	0.589	0.0273345
ENSG00000187134	ENSMUSG00000033715	0.2061	0.6091	0.338368				ENSMUSG00000034336	ENSG00000148798	0.0277	0.5903	0.0469253
ENSG00000122778	ENSMUSG00000063455	0.1824	0.6095	0.299262				ENSMUSG00000001525	ENSG00000196230	0	0.5904	0
ENSG00000137486	ENSMUSG00000018909	0.0064	0.6096	0.0104987				ENSMUSG00000071014	ENSG00000165264	0.2153	0.5905	0.364606
ENSG00000102879	ENSMUSG00000030707	0.0268	0.6098	0.0439488				ENSMUSG00000026825	ENSG00000106976	0.0069	0.5908	0.0116791
ENSG00000171992	ENSMUSG00000043079	0.0903	0.6098	0.148081				ENSMUSG00000032435	ENSG00000144635	0.0277	0.5908	0.0468856
ENSG00000080824	ENSMUSG00000021270	0.0036	0.61	0.00590164				ENSMUSG00000024524	ENSG00000141404	0.0402	0.5909	0.0680318
ENSG00000038382	ENSMUSG00000022263	0.0161	0.6108	0.0263589				ENSMUSG00000027827	ENSG00000169282	0.0842	0.5909	0.142494
ENSG00000072210	ENSMUSG00000010025	0.0879	0.6114	0.143768				ENSMUSG00000024319	ENSG00000223501	0.0098	0.5914	0.0165708
ENSG00000138363	ENSMUSG00000026192	0.0476	0.6118	0.0778032				ENSMUSG00000042228	ENSG00000254087	0.0175	0.5914	0.0295908
ENSG00000158528	ENSMUSG00000032827	0.0496	0.6123	0.081006				ENSMUSG00000031841	ENSG00000140945	0.049	0.5914	0.0828542
ENSG00000116977	ENSMUSG00000057554	0.1274	0.6123	0.208068				ENSMUSG00000031729	ENSG00000182149	0.1346	0.5914	0.227596
ENSG00000148303	ENSMUSG00000070778	0.0236	0.6126	0.0385243				ENSMUSG00000004892	ENSG00000132692	0.0928	0.5917	0.156836
ENSG00000182667	ENSMUSG00000059974	0.0655	0.6133	0.106799				ENSMUSG00000060600	ENSG00000108515	0.0104	0.5918	0.0175735
ENSG00000018625	ENSMUSG00000007097	0.004	0.6139	0.00651572				ENSMUSG00000015143	ENSG00000072110	0.0039	0.5925	0.00658228
ENSG00000150867	ENSMUSG00000026737	0.0078	0.6142	0.0126994				ENSMUSG00000042331	ENSG00000128487	0.0844	0.5929	0.142351
ENSG00000120899	ENSMUSG00000059456	0.0221	0.6142	0.0359818				ENSMUSG00000051675	ENSG00000119401	0.0208	0.5942	0.035005
ENSG00000165868	ENSMUSG00000025092	0.016	0.6143	0.0260459				ENSMUSG00000022340	ENSG00000147642	0.0788	0.5951	0.132415
ENSG00000196296	ENSMUSG00000030730	0.0173	0.6144	0.0281576				ENSMUSG00000051732	ENSG00000151846	0.1459	0.5952	0.245128
ENSG00000108561	ENSMUSG00000018446	0.0713	0.6147	0.115992				ENSMUSG00000039768	ENSG00000007923	0.0154	0.5956	0.0258563
ENSG00000112186	ENSMUSG00000021373	0.0584	0.6148	0.0949902				ENSMUSG00000026163	ENSG00000153820	0.1635	0.5961	0.274283
ENSG00000128564	ENSMUSG00000037428	0.0702	0.615	0.114146				ENSMUSG00000054364	ENSG00000143878	0	0.5967	0
ENSG00000114742	ENSMUSG00000032512	0.0049	0.6151	0.00796618				ENSMUSG00000029334	ENSG00000138669	0.0153	0.599	0.0255426
ENSG00000055163	ENSMUSG00000020340	0.0006	0.6155	0.000974817				ENSMUSG00000037541	ENSG00000162105	0.0774	0.5993	0.129151
ENSG00000177105	ENSMUSG00000073982	0	0.6156	0				ENSMUSG00000017307	ENSG00000101473	0.0799	0.6017	0.13279
ENSG00000213366	ENSMUSG00000040562	0.1219	0.6156	0.198018				ENSMUSG00000017740	ENSG00000124140	0.0139	0.6018	0.0230974
ENSG00000128609	ENSMUSG00000023089	0.0967	0.616	0.156981				ENSMUSG00000029247	ENSG00000128050	0.025	0.602	0.0415282
ENSG00000168280	ENSMUSG00000026764	0.0076	0.6162	0.0123337				ENSMUSG00000031299	ENSG00000131828	0.0108	0.6022	0.0179342
ENSG00000116141	ENSMUSG00000026620	0.028	0.6167	0.045403				ENSMUSG00000026032	ENSG00000119013	0.1361	0.6023	0.225967
ENSG00000118873	ENSMUSG00000039318	0.0577	0.6172	0.0934867				ENSMUSG00000030036	ENSG00000115275	0.0782	0.6034	0.129599
ENSG00000159685	ENSMUSG00000030086	0.2027	0.618	0.327994				ENSMUSG00000023439	ENSG00000111664	0.0141	0.6037	0.023356
ENSG00000052126	ENSMUSG00000030231	0.0859	0.6182	0.138952				ENSMUSG00000060882	ENSG00000184408	0.0044	0.6038	0.00728718
ENSG00000165566	ENSMUSG00000021986	0.1048	0.6182	0.169524				ENSMUSG00000030682	ENSG00000103502	0.0165	0.6038	0.0273269
ENSG00000198242	ENSMUSG00000058546	0	0.6187	0				ENSMUSG00000019998	ENSG00000079950	0.0298	0.604	0.0493377
ENSG00000159842	ENSMUSG00000017631	0.0166	0.6189	0.0268218				ENSMUSG00000029223	ENSG00000154277	0.0213	0.6044	0.0352416
ENSG00000151632	ENSMUSG00000033715	0.2123	0.6193	0.342806				ENSMUSG00000036435	ENSG00000090989	0.0129	0.6049	0.0213258
ENSG00000186197	ENSMUSG00000039309	0.1439	0.6197	0.232209				ENSMUSG00000028931	ENSG00000069424	0.0047	0.6052	0.00776603
ENSG00000040731	ENSMUSG00000022321	0.0167	0.6199	0.0269398				ENSMUSG00000028005	ENSG00000061918	0.0053	0.6052	0.00875744
ENSG00000108852	ENSMUSG00000017314	0.012	0.62	0.0193548				ENSMUSG00000059714	ENSG00000137312	0.0074	0.6061	0.0122092
ENSG00000152137	ENSMUSG00000041548	0.0286	0.6201	0.0461216				ENSMUSG00000061904	ENSG00000075415	0.0598	0.6065	0.0985985
ENSG00000155980	ENSMUSG00000074657	0.0098	0.6205	0.0157937				ENSMUSG00000025613	ENSG00000156261	0.018	0.6072	0.0296443
ENSG00000133612	ENSMUSG00000023353	0.0191	0.6205	0.0307816				ENSMUSG00000020612	ENSG00000108946	0.016	0.6073	0.0263461
ENSG00000157654	ENSMUSG00000089945	0.1013	0.6212	0.163071				ENSMUSG00000002319	ENSG00000196497	0.1035	0.6073	0.170426
ENSG00000157020	ENSMUSG00000030298	0.0141	0.6215	0.022687				ENSMUSG00000027965	ENSG00000118733	0.024	0.6078	0.0394867
ENSG00000156453	ENSMUSG00000051375	0.0329	0.6215	0.0529364				ENSMUSG00000047959	ENSG00000177272	0.0124	0.608	0.0203947
ENSG00000198242	ENSMUSG00000078126	0.0029	0.6225	0.00465863				ENSMUSG00000030653	ENSG00000186642	0.0306	0.6083	0.0503041
ENSG00000117480	ENSMUSG00000034171	0.0895	0.6231	0.143637				ENSMUSG00000031539	ENSG00000070718	0.0079	0.6085	0.0129827
ENSG00000101298	ENSMUSG00000027457	0.0426	0.6239	0.0682802				ENSMUSG00000031483	ENSG00000147475	0.0121	0.6086	0.0198817
ENSG00000103942	ENSMUSG00000025813	0.0242	0.6251	0.0387138				ENSMUSG00000006476	ENSG00000165802	0.0261	0.609	0.0428571
ENSG00000103415	ENSMUSG00000004070	0.0548	0.6257	0.0875819				ENSMUSG00000020658	ENSG00000084710	0.0115	0.6091	0.0188803
ENSG00000167114	ENSMUSG00000059316	0.0399	0.626	0.063738				ENSMUSG00000030707	ENSG00000102879	0.0268	0.6098	0.0439488
ENSG00000104722	ENSMUSG00000022054	0.0413	0.6263	0.0659428				ENSMUSG00000043079	ENSG00000171992	0.0903	0.6098	0.148081
ENSG00000120254	ENSMUSG00000040675	0.0652	0.6263	0.104103				ENSMUSG00000021270	ENSG00000080824	0.0036	0.61	0.00590164
ENSG00000198721	ENSMUSG00000021417	0.1493	0.6274	0.237966				ENSMUSG00000003178	ENSG00000243156	0.0483	0.6107	0.0790896
ENSG00000066557	ENSMUSG00000063052	0.0996	0.6275	0.158725				ENSMUSG00000022263	ENSG00000038382	0.0161	0.6108	0.0263589
ENSG00000167815	ENSMUSG00000005161	0.0305	0.6278	0.0485824				ENSMUSG00000010025	ENSG00000072210	0.0879	0.6114	0.143768
ENSG00000100401	ENSMUSG00000022391	0.0574	0.629	0.091256				ENSMUSG00000019087	ENSG00000071553	0.0777	0.6121	0.12694
ENSG00000163995	ENSMUSG00000029095	0.0407	0.6307	0.0645315				ENSMUSG00000032827	ENSG00000158528	0.0496	0.6123	0.081006
ENSG00000151150	ENSMUSG00000069601	0.0274	0.6311	0.0434163				ENSMUSG00000059974	ENSG00000182667	0.0655	0.6133	0.106799
ENSG00000146731	ENSMUSG00000029447	0.0641	0.6315	0.101504				ENSMUSG00000007097	ENSG00000018625	0.004	0.6139	0.00651572
ENSG00000109971	ENSMUSG00000015656	0.0007	0.633	0.00110585				ENSMUSG00000026737	ENSG00000150867	0.0078	0.6142	0.0126994
ENSG00000196586	ENSMUSG00000033577	0.0153	0.6336	0.0241477				ENSMUSG00000025092	ENSG00000165868	0.016	0.6143	0.0260459
ENSG00000175084	ENSMUSG00000026208	0.0099	0.6349	0.015593				ENSMUSG00000030730	ENSG00000196296	0.0173	0.6144	0.0281576
ENSG00000213088	ENSMUSG00000037872	0.3473	0.6352	0.546757				ENSMUSG00000033595	ENSG00000168481	0.0156	0.6148	0.0253741
ENSG00000072832	ENSMUSG00000029121	0.0157	0.6366	0.0246623				ENSMUSG00000032512	ENSG00000114742	0.0049	0.6151	0.00796618
ENSG00000119139	ENSMUSG00000024812	0.0674	0.6369	0.105825				ENSMUSG00000020340	ENSG00000055163	0.0006	0.6155	0.000974817
ENSG00000103507	ENSMUSG00000030802	0.0236	0.637	0.0370487				ENSMUSG00000073982	ENSG00000177105	0	0.6156	0
ENSG00000131188	ENSMUSG00000034686	0.0126	0.6372	0.019774				ENSMUSG00000026764	ENSG00000168280	0.0076	0.6162	0.0123337
ENSG00000198242	ENSMUSG00000063556	0	0.6375	0				ENSMUSG00000026620	ENSG00000116141	0.028	0.6167	0.045403
ENSG00000075539	ENSMUSG00000070733	0.0266	0.6381	0.0416863				ENSMUSG00000039318	ENSG00000118873	0.0577	0.6172	0.0934867
ENSG00000068903	ENSMUSG00000015149	0.0681	0.6381	0.106723				ENSMUSG00000040136	ENSG00000006071	0.0229	0.6173	0.037097
ENSG00000172809	ENSMUSG00000057322	0.0065	0.6395	0.0101642				ENSMUSG00000030086	ENSG00000159685	0.2027	0.618	0.327994
ENSG00000102606	ENSMUSG00000031511	0.0266	0.6396	0.0415885				ENSMUSG00000030231	ENSG00000052126	0.0859	0.6182	0.138952
ENSG00000107863	ENSMUSG00000036591	0.0742	0.6397	0.115992				ENSMUSG00000058546	ENSG00000198242	0	0.6187	0
ENSG00000162688	ENSMUSG00000033400	0.0409	0.6401	0.0638963				ENSMUSG00000017631	ENSG00000159842	0.0166	0.6189	0.0268218
ENSG00000186868	ENSMUSG00000018411	0.0469	0.6411	0.0731555				ENSMUSG00000022321	ENSG00000040731	0.0167	0.6199	0.0269398
ENSG00000125633	ENSMUSG00000026339	0.0403	0.6421	0.0627628				ENSMUSG00000017314	ENSG00000108852	0.012	0.62	0.0193548
ENSG00000184144	ENSMUSG00000053024	0.0495	0.6432	0.076959				ENSMUSG00000074657	ENSG00000155980	0.0098	0.6205	0.0157937
ENSG00000136848	ENSMUSG00000026883	0.0192	0.6433	0.0298461				ENSMUSG00000023353	ENSG00000133612	0.0191	0.6205	0.0307816
ENSG00000105223	ENSMUSG00000003363	0.0301	0.644	0.0467391				ENSMUSG00000045659	ENSG00000166689	0.0611	0.622	0.0982315
ENSG00000090372	ENSMUSG00000030374	0.0261	0.6442	0.0405154				ENSMUSG00000003178	ENSG00000093100	0.0549	0.6221	0.0882495
ENSG00000182902	ENSMUSG00000004902	0.0638	0.6443	0.0990222				ENSMUSG00000034171	ENSG00000117480	0.0895	0.6231	0.143637
ENSG00000177963	ENSMUSG00000025485	0.0647	0.6446	0.100372				ENSMUSG00000027457	ENSG00000101298	0.0426	0.6239	0.0682802
ENSG00000175220	ENSMUSG00000027247	0.0176	0.6471	0.0271983				ENSMUSG00000025813	ENSG00000103942	0.0242	0.6251	0.0387138
ENSG00000115520	ENSMUSG00000025981	0.0822	0.6477	0.126911				ENSMUSG00000039067	ENSG00000103035	0.0166	0.6257	0.0265303
ENSG00000088387	ENSMUSG00000025558	0.0254	0.6482	0.0391854				ENSMUSG00000047675	ENSG00000142937	0	0.6259	0
ENSG00000104325	ENSMUSG00000028223	0.0988	0.6483	0.152399				ENSMUSG00000059316	ENSG00000167114	0.0399	0.626	0.063738
ENSG00000144908	ENSMUSG00000030088	0.0395	0.6484	0.0609192				ENSMUSG00000022054	ENSG00000104722	0.0413	0.6263	0.0659428
ENSG00000148175	ENSMUSG00000026880	0.0726	0.6487	0.111916				ENSMUSG00000040675	ENSG00000120254	0.0652	0.6263	0.104103
ENSG00000116266	ENSMUSG00000071640	0.0789	0.649	0.121572				ENSMUSG00000005161	ENSG00000167815	0.0305	0.6278	0.0485824
ENSG00000050405	ENSMUSG00000023022	0.1394	0.6493	0.214693				ENSMUSG00000020109	ENSG00000148719	0.0273	0.6303	0.0433127
ENSG00000204314	ENSMUSG00000015476	0.0146	0.6498	0.0224685				ENSMUSG00000029838	ENSG00000105894	0.0134	0.6304	0.0212563
ENSG00000163902	ENSMUSG00000030062	0.0243	0.6499	0.0373904				ENSMUSG00000017404	ENSG00000108298	0	0.6307	0
ENSG00000156931	ENSMUSG00000033653	0.0376	0.6509	0.0577662				ENSMUSG00000029095	ENSG00000163995	0.0407	0.6307	0.0645315
ENSG00000102189	ENSMUSG00000036499	0.0842	0.6518	0.129181				ENSMUSG00000028234	ENSG00000008988	0	0.6308	0
ENSG00000133026	ENSMUSG00000020900	0.0041	0.652	0.00628834				ENSMUSG00000069601	ENSG00000151150	0.0274	0.6311	0.0434163
ENSG00000106367	ENSMUSG00000004849	0	0.6521	0				ENSMUSG00000050211	ENSG00000188089	0.1452	0.6314	0.229965
ENSG00000132932	ENSMUSG00000021983	0.0291	0.6525	0.0445977				ENSMUSG00000036333	ENSG00000134313	0.0297	0.6315	0.0470309
ENSG00000177156	ENSMUSG00000025503	0.0273	0.6536	0.0417687				ENSMUSG00000029447	ENSG00000146731	0.0641	0.6315	0.101504
ENSG00000173786	ENSMUSG00000006782	0.0728	0.6544	0.111247				ENSMUSG00000003410	ENSG00000196361	0.0023	0.6316	0.00364155
ENSG00000105402	ENSMUSG00000006024	0.0074	0.6545	0.0113063				ENSMUSG00000015656	ENSG00000109971	0.0007	0.633	0.00110585
ENSG00000197694	ENSMUSG00000057738	0.0075	0.6547	0.0114556				ENSMUSG00000078695	ENSG00000230055	0.0959	0.6331	0.151477
ENSG00000121053	ENSMUSG00000052234	0.0558	0.6549	0.0852038				ENSMUSG00000024410	ENSG00000141452	0.0255	0.6335	0.0402526
ENSG00000182473	ENSMUSG00000020792	0.0163	0.6551	0.0248817				ENSMUSG00000033577	ENSG00000196586	0.0153	0.6336	0.0241477
ENSG00000029534	ENSMUSG00000031543	0.0478	0.6551	0.072966				ENSMUSG00000004285	ENSG00000226138	0.0579	0.6348	0.0912098
ENSG00000116337	ENSMUSG00000027889	0.014	0.6553	0.0213643				ENSMUSG00000026208	ENSG00000175084	0.0099	0.6349	0.015593
ENSG00000017373	ENSMUSG00000038453	0.017	0.6555	0.0259344				ENSMUSG00000048895	ENSG00000176749	0.0067	0.6357	0.0105396
ENSG00000163346	ENSMUSG00000042613	0.1718	0.6559	0.26193				ENSMUSG00000021277	ENSG00000131323	0.017	0.6361	0.0267254
ENSG00000168589	ENSMUSG00000034467	0.0097	0.6574	0.0147551				ENSMUSG00000029121	ENSG00000072832	0.0157	0.6366	0.0246623
ENSG00000142949	ENSMUSG00000033295	0.0199	0.6578	0.0302524				ENSMUSG00000024812	ENSG00000119139	0.0674	0.6369	0.105825
ENSG00000147459	ENSMUSG00000044447	0.0305	0.6582	0.0463385				ENSMUSG00000030802	ENSG00000103507	0.0236	0.637	0.0370487
ENSG00000134265	ENSMUSG00000024581	0.0091	0.6585	0.0138193				ENSMUSG00000034686	ENSG00000131188	0.0126	0.6372	0.019774
ENSG00000115159	ENSMUSG00000026827	0.0359	0.6586	0.0545096				ENSMUSG00000020926	ENSG00000073670	0.0305	0.6376	0.0478356
ENSG00000116584	ENSMUSG00000028059	0.0603	0.6601	0.0913498				ENSMUSG00000057322	ENSG00000172809	0.0065	0.6395	0.0101642
ENSG00000144867	ENSMUSG00000032553	0.045	0.6603	0.0681508				ENSMUSG00000036591	ENSG00000107863	0.0742	0.6397	0.115992
ENSG00000114353	ENSMUSG00000032562	0.0083	0.6606	0.0125643				ENSMUSG00000028184	ENSG00000117114	0.0213	0.6402	0.0332709
ENSG00000042753	ENSMUSG00000008036	0	0.6616	0				ENSMUSG00000042671	ENSG00000135824	0.03	0.6404	0.0468457
ENSG00000067225	ENSMUSG00000032294	0.0387	0.662	0.0584592				ENSMUSG00000018411	ENSG00000186868	0.0469	0.6411	0.0731555
ENSG00000134419	ENSMUSG00000067351	0.031	0.6627	0.0467783				ENSMUSG00000053024	ENSG00000184144	0.0495	0.6432	0.076959
ENSG00000171564	ENSMUSG00000033831	0.0916	0.6627	0.138222				ENSMUSG00000026883	ENSG00000136848	0.0192	0.6433	0.0298461
ENSG00000182054	ENSMUSG00000030541	0.0218	0.6628	0.0328908				ENSMUSG00000034040	ENSG00000185274	0.0067	0.644	0.0104037
ENSG00000077522	ENSMUSG00000052374	0.0033	0.6637	0.00497213				ENSMUSG00000030374	ENSG00000090372	0.0261	0.6442	0.0405154
ENSG00000172531	ENSMUSG00000040385	0.0013	0.6645	0.00195636				ENSMUSG00000004902	ENSG00000182902	0.0638	0.6443	0.0990222
ENSG00000132612	ENSMUSG00000031913	0.0041	0.6648	0.00616727				ENSMUSG00000030731	ENSG00000213023	0.0167	0.6464	0.0258354
ENSG00000198910	ENSMUSG00000031391	0.0592	0.6655	0.0889557				ENSMUSG00000021338	ENSG00000079691	0.056	0.6471	0.0865399
ENSG00000131844	ENSMUSG00000021646	0.0623	0.6656	0.0935998				ENSMUSG00000024851	ENSG00000110697	0.0325	0.6473	0.0502086
ENSG00000113319	ENSMUSG00000021708	0.0752	0.6659	0.11293				ENSMUSG00000026895	ENSG00000119421	0.0786	0.6481	0.121278
ENSG00000185236	ENSMUSG00000077450	0.0039	0.6664	0.00585234				ENSMUSG00000025558	ENSG00000088387	0.0254	0.6482	0.0391854
ENSG00000117394	ENSMUSG00000028645	0.0156	0.6669	0.0233918				ENSMUSG00000028223	ENSG00000104325	0.0988	0.6483	0.152399
ENSG00000132970	ENSMUSG00000029636	0.0318	0.6677	0.0476262				ENSMUSG00000015476	ENSG00000204314	0.0146	0.6498	0.0224685
ENSG00000116906	ENSMUSG00000031985	0.1116	0.6678	0.167116				ENSMUSG00000030062	ENSG00000163902	0.0243	0.6499	0.0373904
ENSG00000100266	ENSMUSG00000016664	0.0308	0.6693	0.0460182				ENSMUSG00000042870	ENSG00000100284	0.0561	0.6503	0.0862679
ENSG00000075624	ENSMUSG00000029580	0.0022	0.6694	0.00328653				ENSMUSG00000025204	ENSG00000255339	0.1511	0.6505	0.232283
ENSG00000214253	ENSMUSG00000019054	0.0202	0.6698	0.0301583				ENSMUSG00000020900	ENSG00000133026	0.0041	0.652	0.00628834
ENSG00000157985	ENSMUSG00000055013	0.0106	0.671	0.0157973				ENSMUSG00000004849	ENSG00000106367	0	0.6521	0
ENSG00000139180	ENSMUSG00000000399	0.1431	0.6714	0.213137				ENSMUSG00000045034	ENSG00000189127	0.1044	0.6524	0.160025
ENSG00000154654	ENSMUSG00000022762	0.0311	0.6715	0.0463142				ENSMUSG00000021559	ENSG00000196730	0.0238	0.6527	0.0364639
ENSG00000148303	ENSMUSG00000068579	0.0105	0.6723	0.015618				ENSMUSG00000078137	ENSG00000230778	0.0419	0.6527	0.0641949
ENSG00000148303	ENSMUSG00000062758	0.0035	0.6724	0.00520523				ENSMUSG00000026520	ENSG00000143811	0.0377	0.6544	0.05761
ENSG00000175416	ENSMUSG00000047547	0.0228	0.6725	0.0339033				ENSMUSG00000006782	ENSG00000173786	0.0728	0.6544	0.111247
ENSG00000104267	ENSMUSG00000027562	0.1117	0.6729	0.165998				ENSMUSG00000006024	ENSG00000105402	0.0074	0.6545	0.0113063
ENSG00000164303	ENSMUSG00000038173	0.0738	0.6733	0.109609				ENSMUSG00000020599	ENSG00000108370	0.0451	0.6546	0.068897
ENSG00000130427	ENSMUSG00000029711	0.1276	0.6737	0.189402				ENSMUSG00000057738	ENSG00000197694	0.0075	0.6547	0.0114556
ENSG00000115073	ENSMUSG00000037351	0.0047	0.674	0.00697329				ENSMUSG00000020792	ENSG00000182473	0.0163	0.6551	0.0248817
ENSG00000183783	ENSMUSG00000037653	0.0211	0.6743	0.0312917				ENSMUSG00000031543	ENSG00000029534	0.0478	0.6551	0.072966
ENSG00000198053	ENSMUSG00000037902	0.2395	0.6746	0.355025				ENSMUSG00000027889	ENSG00000116337	0.014	0.6553	0.0213643
ENSG00000115415	ENSMUSG00000026104	0.0336	0.6756	0.0497336				ENSMUSG00000038453	ENSG00000017373	0.017	0.6555	0.0259344
ENSG00000150753	ENSMUSG00000022234	0.0208	0.6757	0.0307829				ENSMUSG00000003411	ENSG00000169213	0.0121	0.6558	0.0184507
ENSG00000148090	ENSMUSG00000021460	0.0435	0.6771	0.0642446				ENSMUSG00000033295	ENSG00000142949	0.0199	0.6578	0.0302524
ENSG00000137168	ENSMUSG00000024007	0.0084	0.678	0.0123894				ENSMUSG00000024581	ENSG00000134265	0.0091	0.6585	0.0138193
ENSG00000131378	ENSMUSG00000039316	0.1897	0.679	0.279381				ENSMUSG00000026827	ENSG00000115159	0.0359	0.6586	0.0545096
ENSG00000187134	ENSMUSG00000021211	0.2088	0.6793	0.307375				ENSMUSG00000043542	ENSG00000104427	0.0684	0.6588	0.103825
ENSG00000106789	ENSMUSG00000028337	0.0761	0.6803	0.111862				ENSMUSG00000028059	ENSG00000116584	0.0603	0.6601	0.0913498
ENSG00000104529	ENSMUSG00000055762	0.0799	0.6803	0.117448				ENSMUSG00000032553	ENSG00000144867	0.045	0.6603	0.0681508
ENSG00000187134	ENSMUSG00000021213	0.2224	0.6807	0.326722				ENSMUSG00000032562	ENSG00000114353	0.0083	0.6606	0.0125643
ENSG00000197150	ENSMUSG00000028973	0.0932	0.6808	0.136898				ENSMUSG00000008036	ENSG00000042753	0	0.6616	0
ENSG00000163531	ENSMUSG00000026442	0.0157	0.6811	0.0230509				ENSMUSG00000032294	ENSG00000067225	0.0387	0.662	0.0584592
ENSG00000065054	ENSMUSG00000002504	0.0395	0.6812	0.0579859				ENSMUSG00000052374	ENSG00000077522	0.0033	0.6637	0.00497213
ENSG00000110880	ENSMUSG00000004530	0.0122	0.6823	0.0178807				ENSMUSG00000040385	ENSG00000172531	0.0013	0.6645	0.00195636
ENSG00000102178	ENSMUSG00000015290	0.0519	0.6824	0.0760551				ENSMUSG00000033174	ENSG00000074416	0.0864	0.6651	0.129905
ENSG00000187134	ENSMUSG00000054757	0.1593	0.6827	0.233338				ENSMUSG00000031391	ENSG00000198910	0.0592	0.6655	0.0889557
ENSG00000215642	ENSMUSG00000059854	0.1013	0.6834	0.148229				ENSMUSG00000021646	ENSG00000131844	0.0623	0.6656	0.0935998
ENSG00000102882	ENSMUSG00000063065	0.0124	0.6846	0.0181128				ENSMUSG00000021708	ENSG00000113319	0.0752	0.6659	0.11293
ENSG00000148303	ENSMUSG00000070289	0.0105	0.6853	0.0153218				ENSMUSG00000077450	ENSG00000185236	0.0039	0.6664	0.00585234
ENSG00000139116	ENSMUSG00000022629	0.0291	0.6856	0.0424446				ENSMUSG00000028645	ENSG00000117394	0.0156	0.6669	0.0233918
ENSG00000135631	ENSMUSG00000051343	0.0675	0.686	0.0983965				ENSMUSG00000029636	ENSG00000132970	0.0318	0.6677	0.0476262
ENSG00000213366	ENSMUSG00000004035	0.0893	0.6867	0.130042				ENSMUSG00000031985	ENSG00000116906	0.1116	0.6678	0.167116
ENSG00000103226	ENSMUSG00000030835	0.0363	0.6876	0.0527923				ENSMUSG00000041638	ENSG00000089154	0.031	0.6682	0.0463933
ENSG00000146729	ENSMUSG00000029432	0.0399	0.6884	0.0579605				ENSMUSG00000025290	ENSG00000138326	0.0106	0.6687	0.0158517
ENSG00000049245	ENSMUSG00000028955	0.0331	0.6885	0.0480755				ENSMUSG00000034659	ENSG00000110108	0.1588	0.6688	0.23744
ENSG00000177380	ENSMUSG00000003863	0.0089	0.6891	0.0129154				ENSMUSG00000031906	ENSG00000103056	0.0438	0.67	0.0653731
ENSG00000155265	ENSMUSG00000042532	0.005	0.6892	0.00725479				ENSMUSG00000055013	ENSG00000157985	0.0106	0.671	0.0157973
ENSG00000148303	ENSMUSG00000062358	0.0053	0.6905	0.0076756				ENSMUSG00000000399	ENSG00000139180	0.1431	0.6714	0.213137
ENSG00000196535	ENSMUSG00000000631	0.0241	0.6905	0.0349022				ENSMUSG00000022762	ENSG00000154654	0.0311	0.6715	0.0463142
ENSG00000213366	ENSMUSG00000068762	0.1386	0.6914	0.200463				ENSMUSG00000056602	ENSG00000073910	0.0156	0.6716	0.0232281
ENSG00000110427	ENSMUSG00000068373	0.1466	0.6921	0.211819				ENSMUSG00000000531	ENSG00000161835	0.0425	0.6724	0.0632064
ENSG00000213923	ENSMUSG00000022433	0.0051	0.6924	0.00736568				ENSMUSG00000047547	ENSG00000175416	0.0228	0.6725	0.0339033
ENSG00000104888	ENSMUSG00000070570	0.0062	0.6934	0.00894145				ENSMUSG00000038173	ENSG00000164303	0.0738	0.6733	0.109609
ENSG00000132681	ENSMUSG00000007107	0.099	0.6935	0.142754				ENSMUSG00000029711	ENSG00000130427	0.1276	0.6737	0.189402
ENSG00000126583	ENSMUSG00000078816	0.0096	0.6942	0.0138289				ENSMUSG00000037351	ENSG00000115073	0.0047	0.674	0.00697329
ENSG00000159720	ENSMUSG00000013160	0.0013	0.6943	0.00187239				ENSMUSG00000037653	ENSG00000183783	0.0211	0.6743	0.0312917
ENSG00000101336	ENSMUSG00000003283	0.0502	0.6948	0.072251				ENSMUSG00000037902	ENSG00000198053	0.2395	0.6746	0.355025
ENSG00000138768	ENSMUSG00000029407	0.0749	0.6955	0.107692				ENSMUSG00000018042	ENSG00000100243	0.0588	0.6755	0.0870466
ENSG00000013364	ENSMUSG00000030681	0.045	0.696	0.0646552				ENSMUSG00000022234	ENSG00000150753	0.0208	0.6757	0.0307829
ENSG00000198721	ENSMUSG00000021416	0.2112	0.6961	0.303405				ENSMUSG00000021460	ENSG00000148090	0.0435	0.6771	0.0642446
ENSG00000076356	ENSMUSG00000026640	0.0167	0.6968	0.0239667				ENSMUSG00000026347	ENSG00000152128	0.0533	0.6781	0.078602
ENSG00000164402	ENSMUSG00000018398	0.0097	0.6978	0.0139008				ENSMUSG00000039316	ENSG00000131378	0.1897	0.679	0.279381
ENSG00000148303	ENSMUSG00000066452	0.0018	0.6987	0.00257621				ENSMUSG00000025477	ENSG00000068383	0.029	0.6795	0.0426784
ENSG00000151632	ENSMUSG00000054757	0.1659	0.6987	0.237441				ENSMUSG00000028337	ENSG00000106789	0.0761	0.6803	0.111862
ENSG00000108828	ENSMUSG00000034993	0.0463	0.6988	0.0662564				ENSMUSG00000055762	ENSG00000104529	0.0799	0.6803	0.117448
ENSG00000173599	ENSMUSG00000024892	0.0151	0.6994	0.0215899				ENSMUSG00000028973	ENSG00000197150	0.0932	0.6808	0.136898
ENSG00000167191	ENSMUSG00000008734	0.068	0.6994	0.0972262				ENSMUSG00000026442	ENSG00000163531	0.0157	0.6811	0.0230509
ENSG00000151632	ENSMUSG00000021211	0.2109	0.6996	0.301458				ENSMUSG00000028757	ENSG00000244038	0.0253	0.6815	0.037124
ENSG00000120694	ENSMUSG00000029657	0.0347	0.6998	0.0495856				ENSMUSG00000028525	ENSG00000184588	0.0905	0.6815	0.132795
ENSG00000184117	ENSMUSG00000034285	0.0295	0.7001	0.0421368				ENSMUSG00000022623	ENSG00000251322	0.0231	0.6816	0.0338908
ENSG00000151632	ENSMUSG00000021213	0.225	0.7002	0.321337				ENSMUSG00000004530	ENSG00000110880	0.0122	0.6823	0.0178807
ENSG00000166676	ENSMUSG00000050908	0.0618	0.7007	0.0881975				ENSMUSG00000002808	ENSG00000086289	0.1132	0.6823	0.165909
ENSG00000125844	ENSMUSG00000027422	0.0765	0.704	0.108665				ENSMUSG00000042426	ENSG00000067248	0.0477	0.6825	0.0698901
ENSG00000171557	ENSMUSG00000033860	0.0947	0.7046	0.134402				ENSMUSG00000022840	ENSG00000173175	0.0197	0.6839	0.0288054
ENSG00000197102	ENSMUSG00000018707	0.0036	0.7054	0.00510349				ENSMUSG00000051343	ENSG00000135631	0.0675	0.686	0.0983965
ENSG00000187134	ENSMUSG00000025955	0.1779	0.706	0.251983				ENSMUSG00000057506	ENSG00000196072	0.0253	0.6866	0.0368482
ENSG00000151632	ENSMUSG00000071551	0.1806	0.7062	0.255735				ENSMUSG00000063316	ENSG00000131469	0.0007	0.6875	0.00101818
ENSG00000186716	ENSMUSG00000009681	0.026	0.7067	0.0367907				ENSMUSG00000030835	ENSG00000103226	0.0363	0.6876	0.0527923
ENSG00000076864	ENSMUSG00000041351	0.0149	0.7072	0.021069				ENSMUSG00000000486	ENSG00000180096	0.0197	0.6884	0.0286171
ENSG00000095713	ENSMUSG00000042401	0.0664	0.7072	0.0938914				ENSMUSG00000029432	ENSG00000146729	0.0399	0.6884	0.0579605
ENSG00000107957	ENSMUSG00000053617	0.0443	0.7077	0.0625971				ENSMUSG00000028955	ENSG00000049245	0.0331	0.6885	0.0480755
ENSG00000148303	ENSMUSG00000062647	0.0018	0.7085	0.00254058				ENSMUSG00000003863	ENSG00000177380	0.0089	0.6891	0.0129154
ENSG00000156515	ENSMUSG00000037012	0.0478	0.7085	0.0674665				ENSMUSG00000042532	ENSG00000155265	0.005	0.6892	0.00725479
ENSG00000152767	ENSMUSG00000025555	0.0396	0.7088	0.0558691				ENSMUSG00000000631	ENSG00000196535	0.0241	0.6905	0.0349022
ENSG00000148303	ENSMUSG00000071052	0.0071	0.7089	0.0100155				ENSMUSG00000029765	ENSG00000221866	0.01	0.6911	0.0144697
ENSG00000183735	ENSMUSG00000020115	0.0307	0.7089	0.0433065				ENSMUSG00000030835	ENSG00000185164	0.0363	0.6911	0.052525
ENSG00000163013	ENSMUSG00000047013	0.0133	0.7097	0.0187403				ENSMUSG00000068373	ENSG00000110427	0.1466	0.6921	0.211819
ENSG00000173230	ENSMUSG00000034243	0.1541	0.7098	0.217103				ENSMUSG00000022433	ENSG00000213923	0.0051	0.6924	0.00736568
ENSG00000133315	ENSMUSG00000036278	0.0735	0.7103	0.103477				ENSMUSG00000037989	ENSG00000165238	0.1176	0.6931	0.169672
ENSG00000112294	ENSMUSG00000035936	0.0867	0.7109	0.121958				ENSMUSG00000070570	ENSG00000104888	0.0062	0.6934	0.00894145
ENSG00000151632	ENSMUSG00000025955	0.1894	0.7113	0.266273				ENSMUSG00000007107	ENSG00000132681	0.099	0.6935	0.142754
ENSG00000067842	ENSMUSG00000031376	0.0088	0.7116	0.0123665				ENSMUSG00000078816	ENSG00000126583	0.0096	0.6942	0.0138289
ENSG00000088899	ENSMUSG00000037703	0.021	0.7118	0.0295027				ENSMUSG00000013160	ENSG00000159720	0.0013	0.6943	0.00187239
ENSG00000082397	ENSMUSG00000024044	0.0644	0.7119	0.0904621				ENSMUSG00000003283	ENSG00000101336	0.0502	0.6948	0.072251
ENSG00000204128	ENSMUSG00000026227	0.1803	0.7135	0.252698				ENSMUSG00000064030	ENSG00000170473	0.0501	0.6956	0.0720242
ENSG00000002834	ENSMUSG00000038366	0.019	0.715	0.0265734				ENSMUSG00000018398	ENSG00000164402	0.0097	0.6978	0.0139008
ENSG00000096696	ENSMUSG00000054889	0.0232	0.7152	0.0324385				ENSMUSG00000030835	ENSG00000103512	0.0354	0.6978	0.0507309
ENSG00000162407	ENSMUSG00000028517	0.0232	0.716	0.0324022				ENSMUSG00000000325	ENSG00000099889	0.0434	0.6987	0.0621154
ENSG00000005381	ENSMUSG00000009350	0.0775	0.7161	0.108225				ENSMUSG00000008734	ENSG00000167191	0.068	0.6994	0.0972262
ENSG00000187134	ENSMUSG00000071551	0.1769	0.7165	0.246895				ENSMUSG00000029657	ENSG00000120694	0.0347	0.6998	0.0495856
ENSG00000141385	ENSMUSG00000024527	0.0364	0.7166	0.0507954				ENSMUSG00000034285	ENSG00000184117	0.0295	0.7001	0.0421368
ENSG00000100075	ENSMUSG00000003528	0.0256	0.7173	0.0356894				ENSMUSG00000050908	ENSG00000166676	0.0618	0.7007	0.0881975
ENSG00000161618	ENSMUSG00000007833	0.1104	0.7177	0.153825				ENSMUSG00000013367	ENSG00000142549	0.0089	0.701	0.0126961
ENSG00000105254	ENSMUSG00000006095	0.0558	0.7186	0.077651				ENSMUSG00000018707	ENSG00000197102	0.0036	0.7054	0.00510349
ENSG00000150760	ENSMUSG00000058325	0.017	0.7208	0.0235849				ENSMUSG00000015766	ENSG00000151491	0.055	0.7059	0.0779147
ENSG00000071127	ENSMUSG00000005103	0.0227	0.7209	0.0314884				ENSMUSG00000009681	ENSG00000186716	0.026	0.7067	0.0367907
ENSG00000138758	ENSMUSG00000058013	0.0043	0.7227	0.00594991				ENSMUSG00000028495	ENSG00000137154	0.0007	0.7072	0.000989819
ENSG00000089220	ENSMUSG00000047104	0.0911	0.7227	0.126055				ENSMUSG00000042401	ENSG00000095713	0.0664	0.7072	0.0938914
ENSG00000103966	ENSMUSG00000027293	0.0146	0.723	0.0201936				ENSMUSG00000062647	ENSG00000148303	0.0018	0.7085	0.00254058
ENSG00000174996	ENSMUSG00000024862	0.0205	0.7236	0.0283306				ENSMUSG00000034245	ENSG00000163517	0.0398	0.7085	0.056175
ENSG00000159231	ENSMUSG00000022947	0.0796	0.7241	0.10993				ENSMUSG00000037012	ENSG00000156515	0.0478	0.7085	0.0674665
ENSG00000075340	ENSMUSG00000030000	0.0351	0.7255	0.0483804				ENSMUSG00000025555	ENSG00000152767	0.0396	0.7088	0.0558691
ENSG00000116288	ENSMUSG00000028964	0.0495	0.7255	0.0682288				ENSMUSG00000002010	ENSG00000067829	0.0252	0.7095	0.035518
ENSG00000131018	ENSMUSG00000019769	0.0735	0.7274	0.101045				ENSMUSG00000047013	ENSG00000163013	0.0133	0.7097	0.0187403
ENSG00000089009	ENSMUSG00000029614	0.0595	0.7275	0.0817869				ENSMUSG00000029088	ENSG00000185774	0.0741	0.7101	0.104351
ENSG00000105726	ENSMUSG00000031862	0.0255	0.7278	0.0350371				ENSMUSG00000031376	ENSG00000067842	0.0088	0.7116	0.0123665
ENSG00000105443	ENSMUSG00000003269	0.0032	0.728	0.0043956				ENSMUSG00000037703	ENSG00000088899	0.021	0.7118	0.0295027
ENSG00000109756	ENSMUSG00000062232	0.0328	0.7285	0.045024				ENSMUSG00000024044	ENSG00000082397	0.0644	0.7119	0.0904621
ENSG00000174791	ENSMUSG00000024883	0.1283	0.7291	0.17597				ENSMUSG00000030397	ENSG00000007047	0.0506	0.7135	0.070918
ENSG00000126803	ENSMUSG00000059970	0.0019	0.7296	0.00260417				ENSMUSG00000038366	ENSG00000002834	0.019	0.715	0.0265734
ENSG00000184779	ENSMUSG00000050978	0.0775	0.7299	0.106179				ENSMUSG00000066235	ENSG00000144647	0.0302	0.7156	0.0422023
ENSG00000004939	ENSMUSG00000006574	0.103	0.73	0.141096				ENSMUSG00000034685	ENSG00000161682	0.0256	0.7157	0.0357692
ENSG00000146122	ENSMUSG00000040260	0.0401	0.7303	0.0549089				ENSMUSG00000028517	ENSG00000162407	0.0232	0.716	0.0324022
ENSG00000105220	ENSMUSG00000036427	0.0596	0.7309	0.0815433				ENSMUSG00000037601	ENSG00000239672	0.0295	0.716	0.0412011
ENSG00000068976	ENSMUSG00000032648	0.0139	0.7326	0.0189735				ENSMUSG00000024527	ENSG00000141385	0.0364	0.7166	0.0507954
ENSG00000196961	ENSMUSG00000060279	0.0062	0.7345	0.00844112				ENSMUSG00000003528	ENSG00000100075	0.0256	0.7173	0.0356894
ENSG00000184922	ENSMUSG00000055805	0.0601	0.736	0.0816576				ENSMUSG00000020173	ENSG00000106078	0.2314	0.7176	0.322464
ENSG00000110931	ENSMUSG00000029471	0.0545	0.7363	0.0740187				ENSMUSG00000022210	ENSG00000157326	0.121	0.7189	0.168313
ENSG00000197444	ENSMUSG00000021913	0.0325	0.7382	0.044026				ENSMUSG00000058325	ENSG00000150760	0.017	0.7208	0.0235849
ENSG00000168003	ENSMUSG00000010095	0.1946	0.7392	0.263258				ENSMUSG00000058013	ENSG00000138758	0.0043	0.7227	0.00594991
ENSG00000187134	ENSMUSG00000021207	0.1679	0.7402	0.226831				ENSMUSG00000017132	ENSG00000108669	0.0068	0.7229	0.00940656
ENSG00000131899	ENSMUSG00000020536	0.0541	0.7409	0.0730193				ENSMUSG00000027293	ENSG00000103966	0.0146	0.723	0.0201936
ENSG00000169258	ENSMUSG00000069227	0.3717	0.7413	0.501416				ENSMUSG00000024862	ENSG00000174996	0.0205	0.7236	0.0283306
ENSG00000124772	ENSMUSG00000024008	0.0087	0.7424	0.0117188				ENSMUSG00000030000	ENSG00000075340	0.0351	0.7255	0.0483804
ENSG00000100092	ENSMUSG00000022436	0.1038	0.7427	0.13976				ENSMUSG00000004113	ENSG00000148408	0.0336	0.7256	0.0463065
ENSG00000138796	ENSMUSG00000027984	0.0516	0.7449	0.069271				ENSMUSG00000036611	ENSG00000122547	0.0502	0.726	0.069146
ENSG00000072071	ENSMUSG00000013033	0.0071	0.7464	0.00951233				ENSMUSG00000019769	ENSG00000131018	0.0735	0.7274	0.101045
ENSG00000139719	ENSMUSG00000029434	0.0102	0.7471	0.0136528				ENSMUSG00000029614	ENSG00000089009	0.0595	0.7275	0.0817869
ENSG00000148356	ENSMUSG00000026792	0.0637	0.7472	0.0852516				ENSMUSG00000031862	ENSG00000105726	0.0255	0.7278	0.0350371
ENSG00000131626	ENSMUSG00000037519	0.0211	0.7474	0.0282312				ENSMUSG00000003269	ENSG00000105443	0.0032	0.728	0.0043956
ENSG00000169020	ENSMUSG00000050856	0.0622	0.7477	0.0831884				ENSMUSG00000062232	ENSG00000109756	0.0328	0.7285	0.045024
ENSG00000168439	ENSMUSG00000024966	0.0128	0.7489	0.0170917				ENSMUSG00000009863	ENSG00000117118	0.047	0.7292	0.0644542
ENSG00000134333	ENSMUSG00000063229	0.0332	0.7492	0.0443139				ENSMUSG00000059970	ENSG00000126803	0.0019	0.7296	0.00260417
ENSG00000176884	ENSMUSG00000026959	0.0041	0.7495	0.00547031				ENSMUSG00000040260	ENSG00000146122	0.0401	0.7303	0.0549089
ENSG00000132024	ENSMUSG00000036686	0.0928	0.7498	0.123766				ENSMUSG00000036427	ENSG00000105220	0.0596	0.7309	0.0815433
ENSG00000187134	ENSMUSG00000021210	0.1443	0.7499	0.192426				ENSMUSG00000070304	ENSG00000149575	0.0378	0.7327	0.05159
ENSG00000176894	ENSMUSG00000029499	0.1378	0.7509	0.183513				ENSMUSG00000062151	ENSG00000137766	0.0528	0.7339	0.0719444
ENSG00000213366	ENSMUSG00000027890	0.1278	0.751	0.170173				ENSMUSG00000060279	ENSG00000196961	0.0062	0.7345	0.00844112
ENSG00000205981	ENSMUSG00000027679	0.1616	0.7521	0.214865				ENSMUSG00000054720	ENSG00000171488	0.0147	0.7345	0.0200136
ENSG00000100285	ENSMUSG00000020396	0.0925	0.7524	0.12294				ENSMUSG00000055805	ENSG00000184922	0.0601	0.736	0.0816576
ENSG00000136928	ENSMUSG00000039809	0.0088	0.7527	0.0116912				ENSMUSG00000021913	ENSG00000197444	0.0325	0.7382	0.044026
ENSG00000010278	ENSMUSG00000030342	0.0606	0.7533	0.080446				ENSMUSG00000010095	ENSG00000168003	0.1946	0.7392	0.263258
ENSG00000142875	ENSMUSG00000005034	0.0402	0.7537	0.0533369				ENSMUSG00000018507	ENSG00000187688	0.1113	0.7394	0.150527
ENSG00000117154	ENSMUSG00000040972	0.0298	0.7553	0.0394545				ENSMUSG00000021057	ENSG00000179841	0.254	0.7406	0.342965
ENSG00000106992	ENSMUSG00000026817	0.0574	0.7554	0.0759862				ENSMUSG00000020536	ENSG00000131899	0.0541	0.7409	0.0730193
ENSG00000197879	ENSMUSG00000017774	0.0183	0.7564	0.0241935				ENSMUSG00000069227	ENSG00000169258	0.3717	0.7413	0.501416
ENSG00000110700	ENSMUSG00000090862	0	0.7565	0				ENSMUSG00000024008	ENSG00000124772	0.0087	0.7424	0.0117188
ENSG00000110700	ENSMUSG00000069972	0	0.7565	0				ENSMUSG00000040479	ENSG00000149091	0.0457	0.7437	0.0614495
ENSG00000151632	ENSMUSG00000021207	0.1673	0.7571	0.220975				ENSMUSG00000060244	ENSG00000183684	0.0465	0.744	0.0625
ENSG00000131437	ENSMUSG00000018395	0.01	0.7572	0.0132066				ENSMUSG00000053930	ENSG00000188803	0.0497	0.7442	0.0667831
ENSG00000161681	ENSMUSG00000038738	0.0297	0.7582	0.0391717				ENSMUSG00000054027	ENSG00000111696	0.038	0.745	0.0510067
ENSG00000104142	ENSMUSG00000034216	0.0194	0.7583	0.0255835				ENSMUSG00000013033	ENSG00000072071	0.0071	0.7464	0.00951233
ENSG00000167863	ENSMUSG00000061992	0.1563	0.7583	0.206119				ENSMUSG00000029577	ENSG00000151148	0.0395	0.7467	0.0528994
ENSG00000131095	ENSMUSG00000020932	0.0372	0.7595	0.0489796				ENSMUSG00000029434	ENSG00000139719	0.0102	0.7471	0.0136528
ENSG00000110700	ENSMUSG00000066362	0	0.7601	0				ENSMUSG00000037519	ENSG00000131626	0.0211	0.7474	0.0282312
ENSG00000111344	ENSMUSG00000029602	0.0738	0.7601	0.0970925				ENSMUSG00000050856	ENSG00000169020	0.0622	0.7477	0.0831884
ENSG00000100241	ENSMUSG00000036529	0.0265	0.7612	0.0348135				ENSMUSG00000023944	ENSG00000096384	0.0018	0.7489	0.00240353
ENSG00000089009	ENSMUSG00000057605	0.0666	0.7615	0.087459				ENSMUSG00000063229	ENSG00000134333	0.0332	0.7492	0.0443139
ENSG00000103496	ENSMUSG00000030805	0.0454	0.7624	0.0595488				ENSMUSG00000026959	ENSG00000176884	0.0041	0.7495	0.00547031
ENSG00000173898	ENSMUSG00000067889	0.0255	0.7634	0.0334032				ENSMUSG00000036686	ENSG00000132024	0.0928	0.7498	0.123766
ENSG00000151632	ENSMUSG00000021210	0.1532	0.7634	0.200681				ENSMUSG00000027679	ENSG00000205981	0.1616	0.7521	0.214865
ENSG00000089009	ENSMUSG00000091086	0.0791	0.7637	0.103575				ENSMUSG00000020396	ENSG00000100285	0.0925	0.7524	0.12294
ENSG00000143799	ENSMUSG00000026496	0.0373	0.7647	0.0487773				ENSMUSG00000039809	ENSG00000136928	0.0088	0.7527	0.0116912
ENSG00000018236	ENSMUSG00000055022	0.0222	0.7658	0.0289893				ENSMUSG00000005034	ENSG00000142875	0.0402	0.7537	0.0533369
ENSG00000100316	ENSMUSG00000068262	0.0129	0.7661	0.0168385				ENSMUSG00000026520	ENSG00000255835	0.1846	0.7539	0.24486
ENSG00000127946	ENSMUSG00000039959	0.0578	0.7663	0.0754274				ENSMUSG00000040972	ENSG00000117154	0.0298	0.7553	0.0394545
ENSG00000177731	ENSMUSG00000002812	0.0221	0.7666	0.0288286				ENSMUSG00000017774	ENSG00000197879	0.0183	0.7564	0.0241935
ENSG00000149260	ENSMUSG00000035547	0.036	0.7682	0.0468628				ENSMUSG00000018395	ENSG00000131437	0.01	0.7572	0.0132066
ENSG00000196924	ENSMUSG00000031328	0.0138	0.7686	0.0179547				ENSMUSG00000044060	ENSG00000069712	0.2828	0.7575	0.373333
ENSG00000198626	ENSMUSG00000021313	0.0227	0.7696	0.0294958				ENSMUSG00000038738	ENSG00000161681	0.0297	0.7582	0.0391717
ENSG00000128266	ENSMUSG00000040009	0.0068	0.7701	0.00883002				ENSMUSG00000034216	ENSG00000104142	0.0194	0.7583	0.0255835
ENSG00000060709	ENSMUSG00000029420	0.0722	0.7701	0.0937541				ENSMUSG00000020932	ENSG00000131095	0.0372	0.7595	0.0489796
ENSG00000167460	ENSMUSG00000031799	0.1017	0.771	0.131907				ENSMUSG00000029101	ENSG00000159788	0.0808	0.7595	0.106386
ENSG00000198752	ENSMUSG00000021279	0.0403	0.7723	0.0521818				ENSMUSG00000066362	ENSG00000110700	0	0.7601	0
ENSG00000100316	ENSMUSG00000060036	0.0075	0.7726	0.00970748				ENSMUSG00000036529	ENSG00000100241	0.0265	0.7612	0.0348135
ENSG00000105409	ENSMUSG00000040907	0.0054	0.7731	0.00698487				ENSMUSG00000067889	ENSG00000173898	0.0255	0.7634	0.0334032
ENSG00000133030	ENSMUSG00000005417	0.0448	0.7735	0.0579186				ENSMUSG00000055022	ENSG00000018236	0.0222	0.7658	0.0289893
ENSG00000127955	ENSMUSG00000057614	0	0.7738	0				ENSMUSG00000030310	ENSG00000157103	0.0093	0.7661	0.0121394
ENSG00000203685	ENSMUSG00000053963	0.0088	0.7745	0.0113622				ENSMUSG00000039959	ENSG00000127946	0.0578	0.7663	0.0754274
ENSG00000110711	ENSMUSG00000024847	0.0254	0.7783	0.0326352				ENSMUSG00000002812	ENSG00000177731	0.0221	0.7666	0.0288286
ENSG00000183773	ENSMUSG00000022763	0.0183	0.78	0.0234615				ENSMUSG00000035547	ENSG00000149260	0.036	0.7682	0.0468628
ENSG00000181790	ENSMUSG00000034730	0.0263	0.7801	0.0337136				ENSMUSG00000021313	ENSG00000198626	0.0227	0.7696	0.0294958
ENSG00000105701	ENSMUSG00000019428	0.0327	0.7803	0.041907				ENSMUSG00000040009	ENSG00000128266	0.0068	0.7701	0.00883002
ENSG00000151914	ENSMUSG00000026131	0.067	0.7804	0.0858534				ENSMUSG00000029420	ENSG00000060709	0.0722	0.7701	0.0937541
ENSG00000123384	ENSMUSG00000040249	0.0089	0.782	0.0113811				ENSMUSG00000021279	ENSG00000198752	0.0403	0.7723	0.0521818
ENSG00000121769	ENSMUSG00000028773	0.0788	0.7823	0.100729				ENSMUSG00000016995	ENSG00000124159	0.0485	0.7724	0.0627913
ENSG00000167863	ENSMUSG00000034566	0.1217	0.7834	0.155348				ENSMUSG00000060036	ENSG00000100316	0.0075	0.7726	0.00970748
ENSG00000117791	ENSMUSG00000073481	0.1399	0.7844	0.178353				ENSMUSG00000040907	ENSG00000105409	0.0054	0.7731	0.00698487
ENSG00000136026	ENSMUSG00000046841	0.0852	0.7854	0.10848				ENSMUSG00000005417	ENSG00000133030	0.0448	0.7735	0.0579186
ENSG00000100347	ENSMUSG00000022437	0.0216	0.786	0.0274809				ENSMUSG00000057614	ENSG00000127955	0	0.7738	0
ENSG00000070182	ENSMUSG00000021061	0.0449	0.786	0.0571247				ENSMUSG00000053963	ENSG00000203685	0.0088	0.7745	0.0113622
ENSG00000105376	ENSMUSG00000032174	0.0812	0.788	0.103046				ENSMUSG00000045092	ENSG00000170989	0.0273	0.775	0.0352258
ENSG00000130558	ENSMUSG00000026833	0.0448	0.7883	0.0568312				ENSMUSG00000033960	ENSG00000165757	0.3317	0.7751	0.427945
ENSG00000079805	ENSMUSG00000033335	0.0079	0.7914	0.00998231				ENSMUSG00000022763	ENSG00000183773	0.0183	0.78	0.0234615
ENSG00000105675	ENSMUSG00000005553	0.0099	0.7919	0.0125016				ENSMUSG00000034730	ENSG00000181790	0.0263	0.7801	0.0337136
ENSG00000181061	ENSMUSG00000038412	0.0705	0.7946	0.0887239				ENSMUSG00000019428	ENSG00000105701	0.0327	0.7803	0.041907
ENSG00000131495	ENSMUSG00000014294	0.0665	0.7972	0.083417				ENSMUSG00000026131	ENSG00000151914	0.067	0.7804	0.0858534
ENSG00000130294	ENSMUSG00000014602	0.0111	0.7975	0.0139185				ENSMUSG00000040249	ENSG00000123384	0.0089	0.782	0.0113811
ENSG00000105379	ENSMUSG00000004610	0.0886	0.7979	0.111041				ENSMUSG00000035735	ENSG00000134780	0.0127	0.7828	0.0162238
ENSG00000167863	ENSMUSG00000068706	0.123	0.7986	0.15402				ENSMUSG00000034566	ENSG00000167863	0.1217	0.7834	0.155348
ENSG00000141556	ENSMUSG00000039230	0.1059	0.7989	0.132557				ENSMUSG00000006269	ENSG00000116039	0.0316	0.7838	0.0403164
ENSG00000159423	ENSMUSG00000028737	0.0406	0.7993	0.0507944				ENSMUSG00000073481	ENSG00000117791	0.1399	0.7844	0.178353
ENSG00000188229	ENSMUSG00000036752	0.0008	0.7997	0.00100038				ENSMUSG00000046841	ENSG00000136026	0.0852	0.7854	0.10848
ENSG00000197448	ENSMUSG00000029864	0.1658	0.8	0.20725				ENSMUSG00000022437	ENSG00000100347	0.0216	0.786	0.0274809
ENSG00000183020	ENSMUSG00000002957	0.0117	0.8013	0.0146013				ENSMUSG00000021061	ENSG00000070182	0.0449	0.786	0.0571247
ENSG00000126267	ENSMUSG00000036751	0.0696	0.8014	0.086848				ENSMUSG00000037902	ENSG00000089012	0.3809	0.7874	0.483744
ENSG00000177542	ENSMUSG00000019082	0.0195	0.8019	0.0243172				ENSMUSG00000032174	ENSG00000105376	0.0812	0.788	0.103046
ENSG00000164715	ENSMUSG00000038970	0.1289	0.8023	0.160663				ENSMUSG00000026833	ENSG00000130558	0.0448	0.7883	0.0568312
ENSG00000062598	ENSMUSG00000017670	0.0566	0.8029	0.0704945				ENSMUSG00000005374	ENSG00000106638	0.0594	0.7897	0.0752184
ENSG00000213760	ENSMUSG00000024403	0.0228	0.8032	0.0283865				ENSMUSG00000026556	ENSG00000162738	0.0025	0.7899	0.00316496
ENSG00000170634	ENSMUSG00000060923	0.0908	0.8036	0.112992				ENSMUSG00000034656	ENSG00000141837	0.0474	0.7899	0.0600076
ENSG00000186907	ENSMUSG00000050896	0.0212	0.8065	0.0262864				ENSMUSG00000033335	ENSG00000079805	0.0079	0.7914	0.00998231
ENSG00000172725	ENSMUSG00000024835	0.0284	0.8084	0.0351311				ENSMUSG00000026933	ENSG00000130559	0.0842	0.7915	0.10638
ENSG00000185800	ENSMUSG00000030410	0.0379	0.8105	0.0467613				ENSMUSG00000021097	ENSG00000165959	0.1807	0.7918	0.228214
ENSG00000164466	ENSMUSG00000021474	0.0325	0.8115	0.0400493				ENSMUSG00000005553	ENSG00000105675	0.0099	0.7919	0.0125016
ENSG00000145494	ENSMUSG00000021606	0.0777	0.8129	0.0955837				ENSMUSG00000035285	ENSG00000090971	0.0245	0.7955	0.0307982
ENSG00000133731	ENSMUSG00000027531	0.073	0.8171	0.0893404				ENSMUSG00000014294	ENSG00000131495	0.0665	0.7972	0.083417
ENSG00000105220	ENSMUSG00000043192	0.0765	0.8172	0.0936123				ENSMUSG00000014602	ENSG00000130294	0.0111	0.7975	0.0139185
ENSG00000168490	ENSMUSG00000003469	0.0025	0.8175	0.0030581				ENSMUSG00000060166	ENSG00000099904	0.0415	0.7986	0.0519659
ENSG00000141200	ENSMUSG00000046755	0.1201	0.8178	0.146857				ENSMUSG00000036752	ENSG00000188229	0.0008	0.7997	0.00100038
ENSG00000167774	ENSMUSG00000041881	0.0503	0.8185	0.0614539				ENSMUSG00000031819	ENSG00000131148	0.0322	0.8012	0.0401897
ENSG00000149823	ENSMUSG00000024797	0.0194	0.8226	0.0235838				ENSMUSG00000002957	ENSG00000183020	0.0117	0.8013	0.0146013
ENSG00000164366	ENSMUSG00000021578	0.0951	0.8238	0.115441				ENSMUSG00000022108	ENSG00000136156	0.0217	0.8014	0.0270776
ENSG00000159692	ENSMUSG00000037373	0.005	0.8246	0.00606355				ENSMUSG00000036751	ENSG00000126267	0.0696	0.8014	0.086848
ENSG00000126602	ENSMUSG00000005981	0.059	0.8247	0.0715412				ENSMUSG00000019082	ENSG00000177542	0.0195	0.8019	0.0243172
ENSG00000180104	ENSMUSG00000034152	0.0189	0.8253	0.0229008				ENSMUSG00000027296	ENSG00000137825	0.0371	0.8021	0.0462536
ENSG00000213366	ENSMUSG00000091578	0.1129	0.8274	0.136452				ENSMUSG00000038970	ENSG00000164715	0.1289	0.8023	0.160663
ENSG00000137285	ENSMUSG00000045136	0	0.8292	0				ENSMUSG00000017670	ENSG00000062598	0.0566	0.8029	0.0704945
ENSG00000130414	ENSMUSG00000026260	0.1407	0.8297	0.169579				ENSMUSG00000024403	ENSG00000213760	0.0228	0.8032	0.0283865
ENSG00000144712	ENSMUSG00000030319	0.0501	0.8325	0.0601802				ENSMUSG00000029361	ENSG00000089250	0.0295	0.806	0.0366005
ENSG00000136279	ENSMUSG00000020476	0.0775	0.8369	0.0926037				ENSMUSG00000030316	ENSG00000144559	0.1255	0.8077	0.155379
ENSG00000124507	ENSMUSG00000040276	0.0201	0.84	0.0239286				ENSMUSG00000027546	ENSG00000054793	0.0088	0.8081	0.0108897
ENSG00000179295	ENSMUSG00000043733	0.0024	0.8403	0.00285612				ENSMUSG00000024835	ENSG00000172725	0.0284	0.8084	0.0351311
ENSG00000169783	ENSMUSG00000049556	0.0027	0.8426	0.00320437				ENSMUSG00000030410	ENSG00000185800	0.0379	0.8105	0.0467613
ENSG00000163931	ENSMUSG00000021957	0.0265	0.8431	0.0314316				ENSMUSG00000022296	ENSG00000164929	0.2638	0.8112	0.325197
ENSG00000178950	ENSMUSG00000062234	0.0985	0.8448	0.116596				ENSMUSG00000021474	ENSG00000164466	0.0325	0.8115	0.0400493
ENSG00000160460	ENSMUSG00000011751	0.0205	0.8451	0.0242575				ENSMUSG00000002459	ENSG00000147509	0.2541	0.8122	0.312854
ENSG00000213366	ENSMUSG00000058135	0.1363	0.8457	0.161168				ENSMUSG00000021606	ENSG00000145494	0.0777	0.8129	0.0955837
ENSG00000117115	ENSMUSG00000028927	0.0347	0.8459	0.0410214				ENSMUSG00000036894	ENSG00000181467	0	0.8131	0
ENSG00000032444	ENSMUSG00000004565	0.0178	0.8466	0.0210253				ENSMUSG00000036158	ENSG00000139174	0.0342	0.8131	0.0420612
ENSG00000130226	ENSMUSG00000061576	0.0356	0.8467	0.0420456				ENSMUSG00000029434	ENSG00000256861	0.0194	0.8134	0.0238505
ENSG00000089169	ENSMUSG00000029608	0.0526	0.8476	0.0620576				ENSMUSG00000046755	ENSG00000141200	0.1201	0.8178	0.146857
ENSG00000144711	ENSMUSG00000034312	0.0272	0.8483	0.0320641				ENSMUSG00000014313	ENSG00000255792	0.2161	0.8179	0.264213
ENSG00000132702	ENSMUSG00000004894	0.0411	0.8487	0.048427				ENSMUSG00000001964	ENSG00000102119	0.1396	0.8184	0.170577
ENSG00000167378	ENSMUSG00000041037	0.109	0.8487	0.128432				ENSMUSG00000041881	ENSG00000167774	0.0503	0.8185	0.0614539
ENSG00000171224	ENSMUSG00000020083	0.0366	0.857	0.0427071				ENSMUSG00000022055	ENSG00000256228	0.0182	0.8189	0.0222249
ENSG00000137267	ENSMUSG00000058672	0.0009	0.8588	0.00104797				ENSMUSG00000021578	ENSG00000164366	0.0951	0.8238	0.115441
ENSG00000103197	ENSMUSG00000002496	0.0467	0.8606	0.0542645				ENSMUSG00000037373	ENSG00000159692	0.005	0.8246	0.00606355
ENSG00000143727	ENSMUSG00000044573	0.1248	0.8613	0.144897				ENSMUSG00000005981	ENSG00000126602	0.059	0.8247	0.0715412
ENSG00000076826	ENSMUSG00000044433	0.0469	0.8631	0.054339				ENSMUSG00000034152	ENSG00000180104	0.0189	0.8253	0.0229008
ENSG00000079435	ENSMUSG00000003123	0.0941	0.8634	0.108988				ENSMUSG00000045136	ENSG00000137285	0	0.8292	0
ENSG00000197122	ENSMUSG00000027646	0.0039	0.8637	0.00451546				ENSMUSG00000026260	ENSG00000130414	0.1407	0.8297	0.169579
ENSG00000160211	ENSMUSG00000031400	0.0296	0.864	0.0342593				ENSMUSG00000036046	ENSG00000100364	0.052	0.8308	0.0625903
ENSG00000105255	ENSMUSG00000011589	0.0358	0.8641	0.0414304				ENSMUSG00000020476	ENSG00000136279	0.0775	0.8369	0.0926037
ENSG00000166165	ENSMUSG00000001270	0.0184	0.8655	0.0212594				ENSMUSG00000037902	ENSG00000101307	0.3737	0.8369	0.446529
ENSG00000213366	ENSMUSG00000004038	0.1395	0.8655	0.161179				ENSMUSG00000040276	ENSG00000124507	0.0201	0.84	0.0239286
ENSG00000129990	ENSMUSG00000004961	0.0444	0.867	0.0512111				ENSMUSG00000043733	ENSG00000179295	0.0024	0.8403	0.00285612
ENSG00000187902	ENSMUSG00000053550	0.0336	0.8709	0.0385808				ENSMUSG00000020219	ENSG00000099800	0.0252	0.8409	0.0299679
ENSG00000166170	ENSMUSG00000049792	0.049	0.8718	0.0562056				ENSMUSG00000049556	ENSG00000169783	0.0027	0.8426	0.00320437
ENSG00000111275	ENSMUSG00000029455	0.0255	0.8733	0.0291996				ENSMUSG00000062234	ENSG00000178950	0.0985	0.8448	0.116596
ENSG00000104946	ENSMUSG00000038520	0.0536	0.8749	0.0612641				ENSMUSG00000004565	ENSG00000032444	0.0178	0.8466	0.0210253
ENSG00000111716	ENSMUSG00000030246	0.0101	0.8754	0.0115376				ENSMUSG00000061576	ENSG00000130226	0.0356	0.8467	0.0420456
ENSG00000136802	ENSMUSG00000007476	0.0045	0.8757	0.00513875				ENSMUSG00000029608	ENSG00000089169	0.0526	0.8476	0.0620576
ENSG00000100994	ENSMUSG00000033059	0.0203	0.8789	0.0230971				ENSMUSG00000034312	ENSG00000144711	0.0272	0.8483	0.0320641
ENSG00000055332	ENSMUSG00000024079	0.3148	0.8795	0.357931				ENSMUSG00000029406	ENSG00000090975	0.0463	0.8495	0.0545026
ENSG00000185359	ENSMUSG00000025793	0.0344	0.8852	0.0388613				ENSMUSG00000035805	ENSG00000100427	0.0588	0.8511	0.0690871
ENSG00000014216	ENSMUSG00000024942	0.0522	0.8853	0.0589631				ENSMUSG00000053375	ENSG00000250565	0.122	0.8535	0.142941
ENSG00000100033	ENSMUSG00000003526	0.0973	0.8868	0.10972				ENSMUSG00000058672	ENSG00000137267	0.0009	0.8588	0.00104797
ENSG00000123143	ENSMUSG00000057672	0.0434	0.8869	0.0489345				ENSMUSG00000078794	ENSG00000197380	0.0597	0.8595	0.069459
ENSG00000148834	ENSMUSG00000025068	0.1754	0.8878	0.197567				ENSMUSG00000032011	ENSG00000154096	0.2074	0.8602	0.241107
ENSG00000127445	ENSMUSG00000032171	0.0232	0.8882	0.0261202				ENSMUSG00000044433	ENSG00000076826	0.0469	0.8631	0.054339
ENSG00000168924	ENSMUSG00000005299	0.1041	0.8928	0.116599				ENSMUSG00000027646	ENSG00000197122	0.0039	0.8637	0.00451546
ENSG00000187091	ENSMUSG00000010660	0.0486	0.894	0.0543624				ENSMUSG00000011589	ENSG00000105255	0.0358	0.8641	0.0414304
ENSG00000172380	ENSMUSG00000036402	0.0128	0.8982	0.0142507				ENSMUSG00000001270	ENSG00000166165	0.0184	0.8655	0.0212594
ENSG00000146701	ENSMUSG00000019179	0.025	0.8983	0.0278303				ENSMUSG00000022956	ENSG00000241837	0.1025	0.8657	0.118401
ENSG00000063660	ENSMUSG00000034220	0.0533	0.8995	0.0592551				ENSMUSG00000004961	ENSG00000129990	0.0444	0.867	0.0512111
ENSG00000095321	ENSMUSG00000026853	0.0459	0.9014	0.0509208				ENSMUSG00000061099	ENSG00000105679	0.1098	0.8671	0.126629
ENSG00000171840	ENSMUSG00000041377	0.1589	0.9018	0.176203				ENSMUSG00000031078	ENSG00000085733	0.0375	0.8682	0.0431928
ENSG00000106089	ENSMUSG00000007207	0.0097	0.9028	0.0107444				ENSMUSG00000053550	ENSG00000187902	0.0336	0.8709	0.0385808
ENSG00000114450	ENSMUSG00000027669	0.0155	0.9059	0.0171101				ENSMUSG00000049792	ENSG00000166170	0.049	0.8718	0.0562056
ENSG00000130827	ENSMUSG00000031398	0.0282	0.907	0.0310915				ENSMUSG00000027257	ENSG00000165912	0.0262	0.8731	0.030008
ENSG00000180900	ENSMUSG00000022568	0.0661	0.9091	0.0727093				ENSMUSG00000030246	ENSG00000111716	0.0101	0.8754	0.0115376
ENSG00000118160	ENSMUSG00000030376	0.0254	0.9112	0.0278753				ENSMUSG00000007476	ENSG00000136802	0.0045	0.8757	0.00513875
ENSG00000123159	ENSMUSG00000019433	0.0159	0.9119	0.0174361				ENSMUSG00000031837	ENSG00000103154	0.075	0.8762	0.0855969
ENSG00000161016	ENSMUSG00000003970	0.0009	0.9123	0.000986518				ENSMUSG00000031971	ENSG00000154429	0.1766	0.8773	0.201299
ENSG00000160211	ENSMUSG00000089992	0.0638	0.9123	0.0699331				ENSMUSG00000067288	ENSG00000233927	0	0.8803	0
ENSG00000105464	ENSMUSG00000002771	0.0103	0.9129	0.0112827				ENSMUSG00000039953	ENSG00000171603	0.0433	0.8834	0.0490152
ENSG00000167971	ENSMUSG00000033597	0.0498	0.9154	0.0544024				ENSMUSG00000001062	ENSG00000075399	0.093	0.8837	0.105239
ENSG00000138834	ENSMUSG00000024163	0.0317	0.9165	0.0345881				ENSMUSG00000043811	ENSG00000040608	0.0622	0.8844	0.0703302
ENSG00000130402	ENSMUSG00000054808	0.0063	0.9179	0.00686349				ENSMUSG00000054277	ENSG00000242247	0.1012	0.8861	0.114208
ENSG00000151640	ENSMUSG00000025478	0.0319	0.9203	0.0346626				ENSMUSG00000005299	ENSG00000168924	0.1041	0.8928	0.116599
ENSG00000141959	ENSMUSG00000020277	0.0289	0.9206	0.0313926				ENSMUSG00000022210	ENSG00000187630	0.1963	0.8955	0.219207
ENSG00000120885	ENSMUSG00000022037	0.1295	0.9207	0.140654				ENSMUSG00000036402	ENSG00000172380	0.0128	0.8982	0.0142507
ENSG00000142534	ENSMUSG00000003429	0	0.9212	0				ENSMUSG00000030600	ENSG00000128011	0.0207	0.8982	0.0230461
ENSG00000116791	ENSMUSG00000028199	0.1114	0.9239	0.120576				ENSMUSG00000019179	ENSG00000146701	0.025	0.8983	0.0278303
ENSG00000167363	ENSMUSG00000025175	0.0658	0.9293	0.070806				ENSMUSG00000053046	ENSG00000174672	0.0098	0.899	0.010901
ENSG00000161714	ENSMUSG00000020937	0.059	0.9294	0.0634818				ENSMUSG00000034220	ENSG00000063660	0.0533	0.8995	0.0592551
ENSG00000106211	ENSMUSG00000004951	0.0803	0.9334	0.0860296				ENSMUSG00000008140	ENSG00000161671	0.0788	0.9021	0.0873517
ENSG00000130787	ENSMUSG00000000915	0.0444	0.9341	0.0475324				ENSMUSG00000007207	ENSG00000106089	0.0097	0.9028	0.0107444
ENSG00000130287	ENSMUSG00000002341	0.2121	0.9356	0.226699				ENSMUSG00000051627	ENSG00000168298	0.029	0.9049	0.0320477
ENSG00000160209	ENSMUSG00000032788	0.07	0.9384	0.0745951				ENSMUSG00000027669	ENSG00000114450	0.0155	0.9059	0.0171101
ENSG00000099814	ENSMUSG00000072825	0.1133	0.9393	0.120622				ENSMUSG00000025318	ENSG00000154118	0.0319	0.9092	0.0350858
ENSG00000005007	ENSMUSG00000058301	0.0054	0.9394	0.00574835				ENSMUSG00000030376	ENSG00000118160	0.0254	0.9112	0.0278753
ENSG00000116661	ENSMUSG00000041556	0.0613	0.9421	0.0650674				ENSMUSG00000019433	ENSG00000123159	0.0159	0.9119	0.0174361
ENSG00000184640	ENSMUSG00000059248	0.0449	0.9425	0.0476393				ENSMUSG00000003970	ENSG00000161016	0.0009	0.9123	0.000986518
ENSG00000075043	ENSMUSG00000016346	0.0219	0.9436	0.023209				ENSMUSG00000002771	ENSG00000105464	0.0103	0.9129	0.0112827
ENSG00000165752	ENSMUSG00000015981	0.0423	0.9443	0.0447951				ENSMUSG00000022210	ENSG00000225766	0.2198	0.9134	0.240639
ENSG00000205531	ENSMUSG00000059119	0.0246	0.9462	0.0259987				ENSMUSG00000033597	ENSG00000167971	0.0498	0.9154	0.0544024
ENSG00000135709	ENSMUSG00000031824	0.0503	0.9539	0.0527309				ENSMUSG00000030287	ENSG00000123104	0.0205	0.9164	0.0223701
ENSG00000170027	ENSMUSG00000051391	0	0.9543	0				ENSMUSG00000024163	ENSG00000138834	0.0317	0.9165	0.0345881
ENSG00000173801	ENSMUSG00000001552	0.0068	0.9569	0.00710628				ENSMUSG00000027508	ENSG00000076641	0.1093	0.9167	0.119232
ENSG00000104419	ENSMUSG00000005125	0.0282	0.96	0.029375				ENSMUSG00000054808	ENSG00000130402	0.0063	0.9179	0.00686349
ENSG00000124126	ENSMUSG00000039621	0.0404	0.9659	0.0418263				ENSMUSG00000025478	ENSG00000151640	0.0319	0.9203	0.0346626
ENSG00000105695	ENSMUSG00000036634	0.0365	0.966	0.0377847				ENSMUSG00000020277	ENSG00000141959	0.0289	0.9206	0.0313926
ENSG00000108064	ENSMUSG00000003923	0.2531	0.9679	0.261494				ENSMUSG00000022037	ENSG00000120885	0.1295	0.9207	0.140654
ENSG00000211899	ENSMUSG00000076617	0.2497	0.9696	0.257529				ENSMUSG00000003429	ENSG00000142534	0	0.9212	0
ENSG00000135406	ENSMUSG00000023484	0.0198	0.9702	0.0204082				ENSMUSG00000025580	ENSG00000141543	0.0033	0.9217	0.00358034
ENSG00000125730	ENSMUSG00000024164	0.1335	0.972	0.137346				ENSMUSG00000026452	ENSG00000143858	0.0093	0.9239	0.010066
ENSG00000183092	ENSMUSG00000040867	0.0559	0.9731	0.0574453				ENSMUSG00000028766	ENSG00000162551	0.0569	0.9249	0.0615202
ENSG00000114554	ENSMUSG00000030084	0.0177	0.9755	0.0181445				ENSMUSG00000040563	ENSG00000105520	0.0681	0.9269	0.0734707
ENSG00000130477	ENSMUSG00000034799	0.0193	0.978	0.0197342				ENSMUSG00000000915	ENSG00000130787	0.0444	0.9341	0.0475324
ENSG00000104863	ENSMUSG00000003872	0.0086	0.9789	0.00878537				ENSMUSG00000002341	ENSG00000130287	0.2121	0.9356	0.226699
ENSG00000013016	ENSMUSG00000024065	0.0115	0.9795	0.0117407				ENSMUSG00000072825	ENSG00000099814	0.1133	0.9393	0.120622
ENSG00000118680	ENSMUSG00000034868	0	0.9801	0				ENSMUSG00000058301	ENSG00000005007	0.0054	0.9394	0.00574835
ENSG00000126214	ENSMUSG00000021288	0.0184	0.9803	0.0187698				ENSMUSG00000041556	ENSG00000116661	0.0613	0.9421	0.0650674
ENSG00000067057	ENSMUSG00000021196	0.0657	0.9898	0.066377				ENSMUSG00000059248	ENSG00000184640	0.0449	0.9425	0.0476393
ENSG00000198755	ENSMUSG00000061988	0.048	0.9903	0.0484702				ENSMUSG00000029093	ENSG00000184985	0.0968	0.9435	0.102597
ENSG00000111229	ENSMUSG00000029465	0.01	0.9927	0.0100735				ENSMUSG00000016346	ENSG00000075043	0.0219	0.9436	0.023209
ENSG00000204390	ENSMUSG00000007033	0.0277	0.9936	0.0278784				ENSMUSG00000026259	ENSG00000066248	0.0729	0.9538	0.0764311
ENSG00000167434	ENSMUSG00000000805	0.34	0.9936	0.34219				ENSMUSG00000051391	ENSG00000170027	0	0.9543	0
ENSG00000008256	ENSMUSG00000018001	0.0042	0.997	0.00421264				ENSMUSG00000001552	ENSG00000173801	0.0068	0.9569	0.00710628
ENSG00000133313	ENSMUSG00000024644	0.0449	1.0031	0.0447612				ENSMUSG00000050132	ENSG00000004139	0.0697	0.9598	0.0726193
ENSG00000131016	ENSMUSG00000038587	0.3012	1.0045	0.299851				ENSMUSG00000062825	ENSG00000184009	0.001	0.9622	0.00103928
ENSG00000130764	ENSMUSG00000029028	0.0678	1.0048	0.0674761				ENSMUSG00000036634	ENSG00000105695	0.0365	0.966	0.0377847
ENSG00000173020	ENSMUSG00000024858	0.0054	1.0073	0.00536087				ENSMUSG00000023484	ENSG00000135406	0.0198	0.9702	0.0204082
ENSG00000167632	ENSMUSG00000047921	0.0384	1.0073	0.0381217				ENSMUSG00000040867	ENSG00000183092	0.0559	0.9731	0.0574453
ENSG00000100345	ENSMUSG00000022443	0.0128	1.011	0.0126607				ENSMUSG00000030084	ENSG00000114554	0.0177	0.9755	0.0181445
ENSG00000092820	ENSMUSG00000052397	0.0153	1.0119	0.0151201				ENSMUSG00000030606	ENSG00000140511	0.1096	0.9773	0.112146
ENSG00000179115	ENSMUSG00000003808	0.0392	1.012	0.0387352				ENSMUSG00000003872	ENSG00000104863	0.0086	0.9789	0.00878537
ENSG00000104524	ENSMUSG00000022571	0.1072	1.017	0.105408				ENSMUSG00000024065	ENSG00000013016	0.0115	0.9795	0.0117407
ENSG00000175866	ENSMUSG00000025372	0.0244	1.0195	0.0239333				ENSMUSG00000004952	ENSG00000105808	0.0722	0.9799	0.073681
ENSG00000203485	ENSMUSG00000037679	0.1279	1.0263	0.124622				ENSMUSG00000034868	ENSG00000118680	0	0.9801	0
ENSG00000196872	ENSMUSG00000026090	0.2563	1.0272	0.249513				ENSMUSG00000021288	ENSG00000126214	0.0184	0.9803	0.0187698
ENSG00000103202	ENSMUSG00000024177	0.0872	1.0328	0.0844307				ENSMUSG00000002949	ENSG00000104980	0.0521	0.9819	0.0530604
ENSG00000167037	ENSMUSG00000042216	0.0276	1.0363	0.0266332				ENSMUSG00000034201	ENSG00000185340	0.0827	0.9828	0.0841473
ENSG00000142347	ENSMUSG00000024300	0.03	1.0404	0.0288351				ENSMUSG00000004952	ENSG00000170667	0.0735	0.9848	0.0746344
ENSG00000131143	ENSMUSG00000031818	0.1136	1.06	0.10717				ENSMUSG00000042644	ENSG00000096433	0.0208	0.9861	0.0210932
ENSG00000159189	ENSMUSG00000036896	0.1503	1.0613	0.141619				ENSMUSG00000021196	ENSG00000067057	0.0657	0.9898	0.066377
ENSG00000165023	ENSMUSG00000047842	0.004	1.0622	0.00376577				ENSMUSG00000029465	ENSG00000111229	0.01	0.9927	0.0100735
ENSG00000119280	ENSMUSG00000031983	0.1155	1.0624	0.108716				ENSMUSG00000007033	ENSG00000204390	0.0277	0.9936	0.0278784
ENSG00000179604	ENSMUSG00000041598	0.1522	1.064	0.143045				ENSMUSG00000000805	ENSG00000167434	0.34	0.9936	0.34219
ENSG00000120645	ENSMUSG00000040797	0.0692	1.0711	0.0646065				ENSMUSG00000037855	ENSG00000138311	0.2516	0.996	0.25261
ENSG00000186111	ENSMUSG00000034902	0.0307	1.0714	0.0286541				ENSMUSG00000018001	ENSG00000008256	0.0042	0.997	0.00421264
ENSG00000169710	ENSMUSG00000025153	0.1023	1.0734	0.0953046				ENSMUSG00000050556	ENSG00000158445	0.0293	1.0026	0.029224
ENSG00000110090	ENSMUSG00000024900	0.0684	1.0786	0.0634155				ENSMUSG00000024858	ENSG00000173020	0.0054	1.0073	0.00536087
ENSG00000105649	ENSMUSG00000031840	0.0037	1.0814	0.00342149				ENSMUSG00000047921	ENSG00000167632	0.0384	1.0073	0.0381217
ENSG00000133392	ENSMUSG00000018830	0.0166	1.0852	0.0152967				ENSMUSG00000022443	ENSG00000100345	0.0128	1.011	0.0126607
ENSG00000182809	ENSMUSG00000006356	0.0321	1.0883	0.0294955				ENSMUSG00000052397	ENSG00000092820	0.0153	1.0119	0.0151201
ENSG00000103160	ENSMUSG00000034189	0.0688	1.0883	0.0632179				ENSMUSG00000003808	ENSG00000179115	0.0392	1.012	0.0387352
ENSG00000175793	ENSMUSG00000047281	0.0133	1.0953	0.0121428				ENSMUSG00000022571	ENSG00000104524	0.1072	1.017	0.105408
ENSG00000213366	ENSMUSG00000091561	0.1669	1.0971	0.152128				ENSMUSG00000025372	ENSG00000175866	0.0244	1.0195	0.0239333
ENSG00000198053	ENSMUSG00000078783	0.5762	1.1022	0.522773				ENSMUSG00000026090	ENSG00000196872	0.2563	1.0272	0.249513
ENSG00000130203	ENSMUSG00000002985	0.1621	1.1109	0.145918				ENSMUSG00000033594	ENSG00000158792	0.0849	1.0277	0.0826117
ENSG00000105426	ENSMUSG00000013236	0.028	1.1169	0.0250694				ENSMUSG00000026223	ENSG00000135916	0.0291	1.0311	0.0282223
ENSG00000172992	ENSMUSG00000020935	0.0431	1.1234	0.0383657				ENSMUSG00000006333	ENSG00000170889	0	1.0328	0
ENSG00000078902	ENSMUSG00000025139	0.0337	1.1253	0.0299476				ENSMUSG00000040794	ENSG00000172247	0.021	1.039	0.0202117
ENSG00000198053	ENSMUSG00000074677	0.3661	1.1364	0.322158				ENSMUSG00000028758	ENSG00000117245	0.1058	1.0469	0.10106
ENSG00000130304	ENSMUSG00000031808	0.0504	1.1428	0.0441022				ENSMUSG00000009894	ENSG00000143740	0.1995	1.0484	0.19029
ENSG00000140983	ENSMUSG00000025733	0.0816	1.1552	0.0706371				ENSMUSG00000026305	ENSG00000124831	0.3234	1.0524	0.307298
ENSG00000106665	ENSMUSG00000063146	0.0402	1.1555	0.0347901				ENSMUSG00000031818	ENSG00000131143	0.1136	1.06	0.10717
ENSG00000197256	ENSMUSG00000032194	0.0889	1.1647	0.0763287				ENSMUSG00000047842	ENSG00000165023	0.004	1.0622	0.00376577
ENSG00000198053	ENSMUSG00000078780	0.5605	1.172	0.478242				ENSMUSG00000029500	ENSG00000247077	0.0685	1.0624	0.0644767
ENSG00000147799	ENSMUSG00000033697	0.0512	1.1761	0.0435337				ENSMUSG00000031983	ENSG00000119280	0.1155	1.0624	0.108716
ENSG00000184702	ENSMUSG00000072214	0.0044	1.179	0.00373198				ENSMUSG00000031453	ENSG00000185989	0.0226	1.0637	0.0212466
ENSG00000198053	ENSMUSG00000078781	0.3648	1.1834	0.308264				ENSMUSG00000022956	ENSG00000249209	0.4239	1.0697	0.396279
ENSG00000162065	ENSMUSG00000036473	0.0347	1.1848	0.0292876				ENSMUSG00000068735	ENSG00000175274	0.0414	1.071	0.0386555
ENSG00000160360	ENSMUSG00000026930	0.0358	1.1868	0.0301651				ENSMUSG00000040797	ENSG00000120645	0.0692	1.0711	0.0646065
ENSG00000072958	ENSMUSG00000003033	0.003	1.189	0.00252313				ENSMUSG00000031840	ENSG00000105649	0.0037	1.0814	0.00342149
ENSG00000099795	ENSMUSG00000033938	0.096	1.1901	0.0806655				ENSMUSG00000029060	ENSG00000197530	0.0377	1.0822	0.0348364
ENSG00000067836	ENSMUSG00000022540	0.0256	1.2029	0.0212819				ENSMUSG00000018830	ENSG00000133392	0.0166	1.0852	0.0152967
ENSG00000166897	ENSMUSG00000043460	0.017	1.2052	0.0141055				ENSMUSG00000006356	ENSG00000182809	0.0321	1.0883	0.0294955
ENSG00000122873	ENSMUSG00000037710	0.0756	1.2145	0.0622478				ENSMUSG00000047281	ENSG00000175793	0.0133	1.0953	0.0121428
ENSG00000075618	ENSMUSG00000029581	0.0146	1.2161	0.0120056				ENSMUSG00000035513	ENSG00000196358	0.0256	1.096	0.0233577
ENSG00000198053	ENSMUSG00000044138	0.363	1.227	0.295844				ENSMUSG00000025855	ENSG00000188191	0.0274	1.0984	0.0249454
ENSG00000167468	ENSMUSG00000075706	0.1129	1.233	0.0915653				ENSMUSG00000029047	ENSG00000157911	0.1056	1.1063	0.0954533
ENSG00000103266	ENSMUSG00000039615	0.0098	1.238	0.00791599				ENSMUSG00000000202	ENSG00000204347	0.0347	1.1077	0.0313262
ENSG00000176595	ENSMUSG00000055675	0.0981	1.239	0.0791768				ENSMUSG00000002985	ENSG00000130203	0.1621	1.1109	0.145918
ENSG00000126934	ENSMUSG00000035027	0.0246	1.2561	0.0195844				ENSMUSG00000007594	ENSG00000187664	0.0456	1.1147	0.0409079
ENSG00000111640	ENSMUSG00000063885	0.2797	1.2636	0.221352				ENSMUSG00000013236	ENSG00000105426	0.028	1.1169	0.0250694
ENSG00000105357	ENSMUSG00000030739	0.0334	1.2706	0.0262868				ENSMUSG00000025139	ENSG00000078902	0.0337	1.1253	0.0299476
ENSG00000109501	ENSMUSG00000039474	0.061	1.2797	0.0476674				ENSMUSG00000031808	ENSG00000130304	0.0504	1.1428	0.0441022
ENSG00000198211	ENSMUSG00000062380	0.0013	1.289	0.00100853				ENSMUSG00000055401	ENSG00000116663	0.1966	1.1544	0.170305
ENSG00000141985	ENSMUSG00000003200	0.025	1.2899	0.0193813				ENSMUSG00000025733	ENSG00000140983	0.0816	1.1552	0.0706371
ENSG00000127948	ENSMUSG00000005514	0.0356	1.297	0.027448				ENSMUSG00000063146	ENSG00000106665	0.0402	1.1555	0.0347901
ENSG00000101460	ENSMUSG00000027602	0.0736	1.3014	0.0565545				ENSMUSG00000032172	ENSG00000105088	0.0277	1.1615	0.0238485
ENSG00000065000	ENSMUSG00000020198	0.0442	1.3155	0.0335994				ENSMUSG00000060938	ENSG00000161970	0	1.1622	0
ENSG00000176788	ENSMUSG00000045763	0.1544	1.3343	0.115716				ENSMUSG00000031833	ENSG00000099308	0.0552	1.1683	0.0472481
ENSG00000167658	ENSMUSG00000034994	0.0043	1.348	0.00318991				ENSMUSG00000058441	ENSG00000073150	0.0321	1.1734	0.0273564
ENSG00000179242	ENSMUSG00000000305	0.0384	1.3552	0.0283353				ENSMUSG00000033697	ENSG00000147799	0.0512	1.1761	0.0435337
ENSG00000183186	ENSMUSG00000045912	0.0433	1.3797	0.0313836				ENSMUSG00000072214	ENSG00000184702	0.0044	1.179	0.00373198
ENSG00000099864	ENSMUSG00000035863	0.1249	1.3825	0.0903436				ENSMUSG00000036473	ENSG00000162065	0.0347	1.1848	0.0292876
ENSG00000101210	ENSMUSG00000016349	0.0014	1.3919	0.00100582				ENSMUSG00000037905	ENSG00000184992	0.1016	1.1931	0.0851563
ENSG00000204389	ENSMUSG00000091971	0.0183	1.3928	0.013139				ENSMUSG00000020238	ENSG00000125912	0.0321	1.2	0.02675
ENSG00000204389	ENSMUSG00000090877	0.0182	1.4097	0.0129105				ENSMUSG00000025475	ENSG00000197177	0.0905	1.2028	0.0752411
ENSG00000143774	ENSMUSG00000020444	0.0625	1.4153	0.0441602				ENSMUSG00000022540	ENSG00000067836	0.0256	1.2029	0.0212819
ENSG00000198010	ENSMUSG00000047495	0.0519	1.4223	0.0364902				ENSMUSG00000029036	ENSG00000160072	0.0743	1.2043	0.0616956
ENSG00000140990	ENSMUSG00000040048	0.1058	1.426	0.0741935				ENSMUSG00000036306	ENSG00000061337	0.0466	1.205	0.0386722
ENSG00000204388	ENSMUSG00000091971	0.0183	1.4379	0.0127269				ENSMUSG00000043460	ENSG00000166897	0.017	1.2052	0.0141055
ENSG00000204388	ENSMUSG00000090877	0.0183	1.4565	0.0125644				ENSMUSG00000008348	ENSG00000170315	0.0039	1.213	0.00321517
ENSG00000116903	ENSMUSG00000074030	0.0299	1.4609	0.0204668				ENSMUSG00000037710	ENSG00000122873	0.0756	1.2145	0.0622478
ENSG00000196365	ENSMUSG00000041168	0.0621	1.466	0.0423602				ENSMUSG00000029581	ENSG00000075618	0.0146	1.2161	0.0120056
ENSG00000171368	ENSMUSG00000021573	0.0369	1.486	0.0248318				ENSMUSG00000003573	ENSG00000051128	0.0564	1.2201	0.0462257
ENSG00000115286	ENSMUSG00000020153	0.0606	1.4872	0.0407477				ENSMUSG00000063646	ENSG00000152969	0.0349	1.2232	0.0285317
ENSG00000007080	ENSMUSG00000007721	0.0423	1.4903	0.0283835				ENSMUSG00000038884	ENSG00000130813	0.0208	1.2248	0.0169824
ENSG00000167671	ENSMUSG00000019578	0.1087	1.5206	0.0714849				ENSMUSG00000075706	ENSG00000167468	0.1129	1.233	0.0915653
ENSG00000142634	ENSMUSG00000040659	0.0249	1.549	0.0160749				ENSMUSG00000039615	ENSG00000103266	0.0098	1.238	0.00791599
ENSG00000127561	ENSMUSG00000007021	0.0288	1.5509	0.0185699				ENSMUSG00000029036	ENSG00000215915	0.1602	1.2527	0.127884
ENSG00000168309	ENSMUSG00000021750	0.0416	1.565	0.0265815				ENSMUSG00000000399	ENSG00000255639	0.2092	1.2606	0.165953
ENSG00000130193	ENSMUSG00000056665	0.0614	1.5821	0.0388092				ENSMUSG00000038690	ENSG00000241468	0.1134	1.2649	0.0896514
ENSG00000178209	ENSMUSG00000022565	0.0299	1.595	0.0187461				ENSMUSG00000030739	ENSG00000105357	0.0334	1.2706	0.0262868
ENSG00000110047	ENSMUSG00000024772	0.0022	1.6009	0.00137423				ENSMUSG00000029036	ENSG00000197785	0.0468	1.2715	0.0368069
ENSG00000172270	ENSMUSG00000023175	0.2229	1.6011	0.139217				ENSMUSG00000025371	ENSG00000176108	0.0306	1.2719	0.0240585
ENSG00000103024	ENSMUSG00000073435	0.0578	1.7278	0.0334529				ENSMUSG00000039474	ENSG00000109501	0.061	1.2797	0.0476674
ENSG00000166136	ENSMUSG00000091471	0.3498	1.7419	0.200815				ENSMUSG00000062380	ENSG00000198211	0.0013	1.289	0.00100853
ENSG00000104833	ENSMUSG00000062591	0.0018	1.8334	0.000981782				ENSMUSG00000003200	ENSG00000141985	0.025	1.2899	0.0193813
ENSG00000099624	ENSMUSG00000003072	0.0757	2.0109	0.0376448				ENSMUSG00000027602	ENSG00000101460	0.0736	1.3014	0.0565545
ENSG00000176619	ENSMUSG00000062075	0.0867	2.2395	0.038714				ENSMUSG00000033900	ENSG00000164114	0.209	1.304	0.160276
ENSG00000180155	ENSMUSG00000075605	0.4135	2.4725	0.16724				ENSMUSG00000055013	ENSG00000204172	0.2136	1.3086	0.163228
ENSG00000170373	ENSMUSG00000027442	0.9662	3.142	0.307511				ENSMUSG00000055013	ENSG00000198035	0.2138	1.3102	0.163181
ENSG00000130255	ENSMUSG00000057863	0.0043	4.2774	0.00100528				ENSMUSG00000045763	ENSG00000176788	0.1544	1.3343	0.115716
ENSG00000088256	ENSMUSG00000034781	0.0089	4.6581	0.00191065				ENSMUSG00000034994	ENSG00000167658	0.0043	1.348	0.00318991
ENSG00000170373	ENSMUSG00000036924	13.4209	11.1545	1.20318				ENSMUSG00000053395	ENSG00000142408	0.013	1.3586	0.00956867
ENSG00000178695	ENSMUSG00000041633	0.2745	26.69	0.0102848				ENSMUSG00000020331	ENSG00000099822	0.0276	1.3785	0.0200218
ENSG00000085063	ENSMUSG00000068686	0.5046	34.08	0.0148063				ENSMUSG00000045912	ENSG00000183186	0.0433	1.3797	0.0313836
								ENSMUSG00000035863	ENSG00000099864	0.1249	1.3825	0.0903436
								ENSMUSG00000016349	ENSG00000101210	0.0014	1.3919	0.00100582
								ENSMUSG00000039457	ENSG00000118898	0.0625	1.3948	0.0448093
								ENSMUSG00000025499	ENSG00000174775	0	1.4086	0
								ENSMUSG00000047495	ENSG00000198010	0.0519	1.4223	0.0364902
								ENSMUSG00000048240	ENSG00000176533	0.0263	1.4239	0.0184704
								ENSMUSG00000040048	ENSG00000140990	0.1058	1.426	0.0741935
								ENSMUSG00000055013	ENSG00000204169	0.2432	1.4276	0.170356
								ENSMUSG00000029419	ENSG00000232434	0.0678	1.4407	0.0470605
								ENSMUSG00000055013	ENSG00000174194	0.2407	1.4521	0.16576
								ENSMUSG00000074030	ENSG00000116903	0.0299	1.4609	0.0204668
								ENSMUSG00000055013	ENSG00000188234	0.2414	1.4623	0.165082
								ENSMUSG00000021573	ENSG00000171368	0.0369	1.486	0.0248318
								ENSMUSG00000020153	ENSG00000115286	0.0606	1.4872	0.0407477
								ENSMUSG00000055013	ENSG00000172650	0.2629	1.5077	0.174372
								ENSMUSG00000055013	ENSG00000204149	0.2716	1.5174	0.17899
								ENSMUSG00000040659	ENSG00000142634	0.0249	1.549	0.0160749
								ENSMUSG00000037979	ENSG00000119242	0.068	1.5494	0.043888
								ENSMUSG00000007021	ENSG00000127561	0.0288	1.5509	0.0185699
								ENSMUSG00000021750	ENSG00000168309	0.0416	1.565	0.0265815
								ENSMUSG00000022565	ENSG00000178209	0.0299	1.595	0.0187461
								ENSMUSG00000023175	ENSG00000172270	0.2229	1.6011	0.139217
								ENSMUSG00000052214	ENSG00000125741	0.1685	1.7863	0.0943291
								ENSMUSG00000062591	ENSG00000104833	0.0018	1.8334	0.000981782
								ENSMUSG00000052565	ENSG00000124575	0.0729	1.8636	0.0391178
								ENSMUSG00000007836	ENSG00000177733	0.0322	1.9088	0.0168692
								ENSMUSG00000036199	ENSG00000186010	0.0818	1.989	0.0411262
								ENSMUSG00000003072	ENSG00000099624	0.0757	2.0109	0.0376448
								ENSMUSG00000048429	ENSG00000142444	0.0959	2.1873	0.043844
								ENSMUSG00000020308	ENSG00000141933	0.0736	2.203	0.033409
								ENSMUSG00000022602	ENSG00000198576	0.0324	2.2847	0.0141813
								ENSMUSG00000050796	ENSG00000176022	0.0793	2.3042	0.0344154
								ENSMUSG00000036181	ENSG00000187837	0.061	2.3826	0.0256023
								ENSMUSG00000020331	ENSG00000256952	0.0238	2.4115	0.00986938
								ENSMUSG00000035835	ENSG00000129951	0.0523	2.477	0.0211143
								ENSMUSG00000064125	ENSG00000183248	0.7099	2.7757	0.255755
								ENSMUSG00000063457	ENSG00000115268	0.0028	2.8141	0.00099499
								ENSMUSG00000057863	ENSG00000130255	0.0043	4.2774	0.00100528
								ENSMUSG00000019261	ENSG00000130479	0.1929	4.4571	0.0432793
								ENSMUSG00000034781	ENSG00000088256	0.0089	4.6581	0.00191065
								ENSMUSG00000046691	ENSG00000178928	1.09	5.3777	0.202689
								ENSMUSG00000058773	ENSG00000184357	0.0421	6.1729	0.00682013
								ENSMUSG00000041633	ENSG00000178695	0.2745	26.69	0.0102848
								ENSMUSG00000024403	ENSG00000254870	0.3693	59.4828	0.00620852
